# Supplementary material
Source: PubMed Central journal article supplement (PMC6299113)
Supplement: 41396_2018_254_MOESM1_ESM.pdf [file 41396_2018_254_MOESM1_ESM.pdf]

# Supplemental Information

Extrachromosomal circular elements targeted by CRISPR-Cas in *Dehalococcoides mccartyi* are linked to mobilization of reductive dehalogenase genes

Olivia Molenda, Shuiquan Tang, Line Lomheim, Vasu Guatam, Sofia Lemak, Alexander F. Yakunin, Karen L. Maxwell and Elizabeth A. Edwards

## Table of Contents

### Additional Method Details

#### Supplementary Figures

- Figure S1.** Diagram of the concatenated gene plasmid used as a qPCR standard
- Figure S2.** *Dehalococcoides mccartyi* KBVC1 and KBDCA3 complete genomes and homology to related genomes.
- Figure S3.** CRISPR-Cas operon from *D. mccartyi* Type I-E and Type I-C.
- Figure S4.** CRISPR Cas1 maximum likelihood tree constructed from an alignment of two hundred and twenty seven Cas1 protein sequences
- Figure S5.** MAUVE nucleotide sequence alignment diagram between two similar KB-1 prophages
- Figure S6.** Representation of *Dehalococcoides mccartyi* KBVC1 CRISPR type I-E Cascade action on prophage target
- Figure S7.** Metagenomic evidence for circular existence of integrative mobilizable elements (IMEs) in *D. mccartyi*
- Figure S8.** Quantitative PCR (qPCR) and gas chromatography (GC) tracking of two KB-1/VC-H<sub>2</sub> cultures during routine growth.

#### Supplementary Tables

- Table S1.** All PCR primers used in this study (qPCR, long and short range PCR and internal primers used for sequencing)
- Table S2.** General features of *Dehalococcoides mccartyi* genomes
- Table S3.** Potential targets of *Dehalococcoides mccartyi* KBVC1, KBDCA3, CBDB1, GT and DCMB5 CRISPRs. Results from BLAST searches
- Table S4.** Putative annotation of open reading frames (ORFs) found in *Dehalococcoides mccartyi* prophages and Enterobacteria lambda and HK97 phages
- Table S5.** Integrative Mobilizable Elements (IMEs) found targeted by the CRISPR systems of *D. mccartyi* KBVC1 and KBDCA3. Names and nucleotide sequences
- Table S6.** IME1-like constructs found in other bacteria available in NCBI
- Table S7.** Quantitative PCR (qPCR) raw data used to make Figures 5 & S8
- Table S8.** Details of standard curves generated for qPCR

#### DNA sequence files:

- File S1.** All *D. mccartyi* CRISPR spacer sequences.
- File S2.** Sequencing of PCR amplified CRISPR array over time from KB-1-VC/H<sub>2</sub>.
- File S3.** *D. mccartyi* prophage nucleotide sequences.
- File S4.** Sequencing of two PCR-amplified products: genomic and circular *vcrA*-islands from KB1/VC/H<sub>2</sub> culture.

### References for Supplemental Information

## Additional Method Details

### Detailed description of enrichment cultures used in the study

The KB-1 set of enrichment cultures originated from microcosms prepared with aquifer materials from a trichloroethene (TCE)-contaminated site in southern Ontario in 1996 as previously described (1). The KB-1 parent enrichment culture, referred to as KB-1/TCE-MeOH, has been maintained in a glass 2L bottle (0.7 L headspace) in anaerobic mineral medium amended with 100 mg/L TCE as electron acceptor and methanol (MeOH) as electron donor, added at 5x the electron equivalents (eeq) required for complete dechlorination, as previously described (1, 2). TCE is completely dechlorinated to ethene prior to refeeding, approximately every 2-4 weeks. Acetogens in the mixed culture ferment added methanol to hydrogen required for energy by *D. mccartyi* and acetate required as carbon source. This parent enrichment culture served as the inoculum for several sub-cultures that were established between 2001 and 2003 and maintained on different chlorinated acceptors, including TCE daughter products *cis*-dichloroethene (cDCE) and vinyl chloride (VC), as well as 1,2-dichloroethane (1,2-DCA). Specifically, in 2001, a sub-culture was created with a 2% transfer into pre-reduced anaerobic mineral medium and maintained on VC and hydrogen as described by Duhamel, Mo (2) and is referred to as KB-1/VC-H<sub>2</sub>. This VC enrichment (200 mL) was maintained in a 250 mL glass bottle sealed using a teflon mininert cap and was amended with 55 mg/L VC (supplied as 5mL pure VC gas) and 5x eeq hydrogen gas (supplied as 5mL H<sub>2</sub>:CO<sub>2</sub> (80:20) Praxair). The KB-1/VC-H<sub>2</sub> enrichment bottle was also amended with 0.5 mM sodium acetate as a carbon source every ten feedings. In 2003, a 1,2-dichloroethane (DCA)-fed enrichment culture was created (KB-1/1,2-DCA-MeOH culture) fed with 250mg/L 1,2-DCA and 5x MeOH, in a 2L glass pyrex bottle containing 1.6 L culture with 0.7 L headspace). Approximately every 6 months, half of each culture was removed and substituted with fresh pre-reduced anaerobic mineral medium to replenish vitamins and buffer. In all enrichment cultures, chlorinated ethenes, methane and ethene concentrations were monitored using gas chromatography with an FID detector (Agilent 7890A GC system, G1888 auto-sampler, helium used as carrier gas, packed inlet, Agilent GSQ-Plot column 0.53mm x 30m), calibrated with external standards.

## Experimental Details for monitoring *vcrA* genomic island

An experiment to specifically monitor the behavior of the *vcrA* genomic island was established using a VC-dechlorinating enrichment culture (KB-1/VC-H<sub>2</sub>). This culture was established in 2001 with hydrogen (H<sub>2</sub>) as electron donor with a goal towards enriching or isolating a *D. mccartyi* strain (2). This mixed culture dechlorinated VC consistently but more slowly than MeOH-amended cultures. For the experiments described herein, three 250 mL bottles containing 150 mL of anaerobic mineral medium were each inoculated with 50 mL of KB-1/VC-H<sub>2</sub> culture. These triplicate cultures were provided an electron donor mix of MeOH and EtOH as 7.5 x eqq rather than H<sub>2</sub> to boost slow dechlorination rates. Three feedings of VC (~25 mg/L) were each dechlorinated to ethene over ~34 days. The next three dechlorination cycles were intensively monitored for VC depletion and ethene production using gas chromatography and samples (2 mL) were taken for subsequent DNA extraction three times a week. These samples were immediately centrifuged (13,000x g, 15 min, 21°C Eppendorf centrifuge 5417R), decanted and stored frozen at -80°C.

## Nucleotide sequence of concatenated *D. mccartyi* gene fragment

This sequence was cloned into a plasmid and used as calibration standard for qPCR.

>*vcrA* – *D.mccartyi* 16s rRNA – *tceA* – *bvcA*

```
>AGGCCCTCCAGATGCTCCCTTACATCATGGGGCAATAGGCTTCAGATGAGAATGT
CAGATGAAGAGCAAAGAAGCGAATTTGGCCGCTAAAAAAGAGAGGTTCCCTGGT
TGGGACGGTGGGTTACACGGGAGAGGGGATCAGCGGGCGGATGCACTATTTTACGC
AGTAACTCAACCATTTCCTGGTAGTGGTGAGGAAGGGCACGGATGAACGCTAGCGG
CGTGCCTTATGCATGCAAGTCGAACGGTCTTAAGCAATTAAGATAGTGGCGAACGG
GTGAGTAACGCGTAAGTAACCTACCTCTAAGTGGGGGATAGCTTCGGGAAACTGAA
GGTAATACCGCATGTGGTGGGCGACATATGTTGGTTCCTAAAGCCGTAAGGCGCT
TGGTGAGGGGCTTGCGTCCGATTAGCTAGTTGGTGGGGTAATGGCCTACCAAGGCTT
CGATCGGTAGCTGGTCTGAGAGGATCCTAATATATGCCGCCACGAATGGCTCACATA
ATTGCTGGGAGAACCCGCTTATGGACGCTATGAAGGTTCTAGGCCTTATCTCTCTA
TGCGAACCATGAATGGAATAAACGGCTTGCATGAATTTGGTCACGCAGATATCAAA
ACCACCAACTACCCGAAGTGGGAGGGTACGCCTGAAGAGAACCTGTTAATCATGCG
CACCGCCGCGCGCTACTTCGGGGCTTCTCCGTTGGCGCCATTAAGATAACGGATAA
CGTGAAGAAAATCTTCTATACCAAAGCCCAGCCCTTATCCTCGGGCCTTGGTATAC
GATTATTATTTAGCGTGGGCAAACAGCAATTTCTGACTGGGAACCAGGAATTAAT
GGCCATGGGCCAACAAGGGACGAAGCTTTATGGTTTGCCTCAAGTACAGGTGGTAT
CGGTAGGTATAGAATTCCTGGTACCCAGCAAATGATGTCCACAATGCGTCTTGACGG
GTCTACTGGTGGTTGGGGTTATTTCAATCAACCACCGGCAGCAGTCTGGGGAGGGAA
ATACCAAGGTGGGAAGGAA
```

## Supplementary Figures

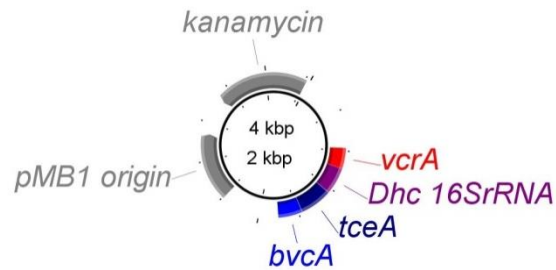

**Figure S1. Diagram of the concatenated gene plasmid used as a qPCR standard.** The plasmid containing fragments of the *D. mccartyi* 16S rRNA, *vcrA*, *bvCA* and *tceA* genes. Full nucleotide sequence is listed in Additional Method details above.

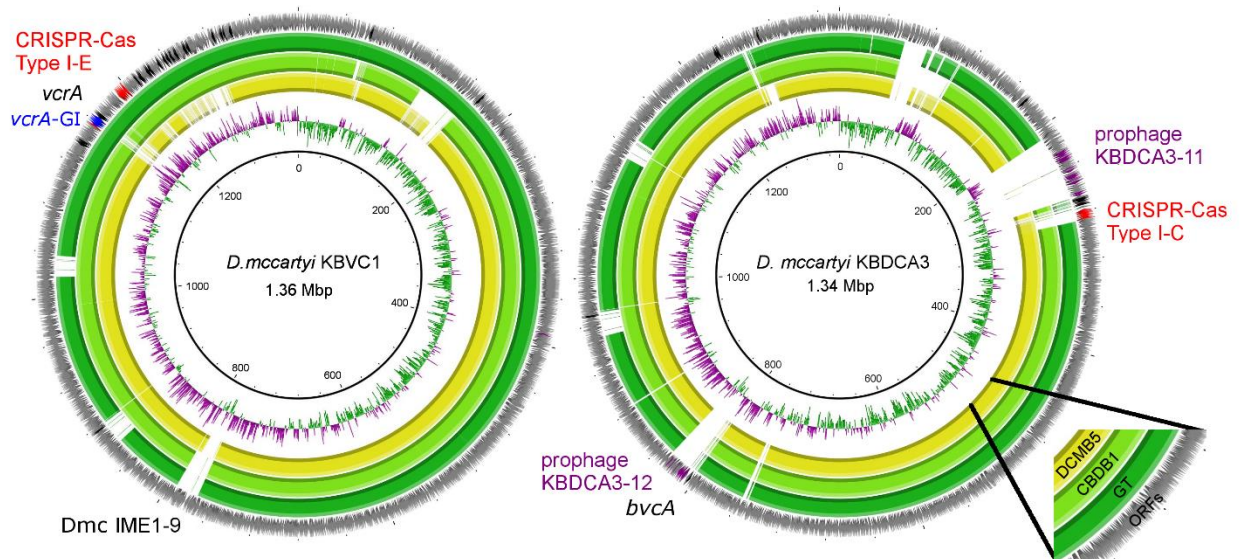

**Figure S2. *Dehalococcoides mccartyi* KBVC1 and KBDC3 complete genomes and homology to related genomes.** Rings inner to outer: (1) position on genome, (2) GC skew where green (+)/purple (-), (3-5) BLASTN hits (>70% identity) to other *D. mccartyi* strains with CRISPR systems including DCMB5, CBDB1, and GT, (6) open reading frames (ORFs). Predicted prophage genes are highlighted in purple, reductive dehalogenase (*rdhA*) in black, CRISPR-associated proteins in red.

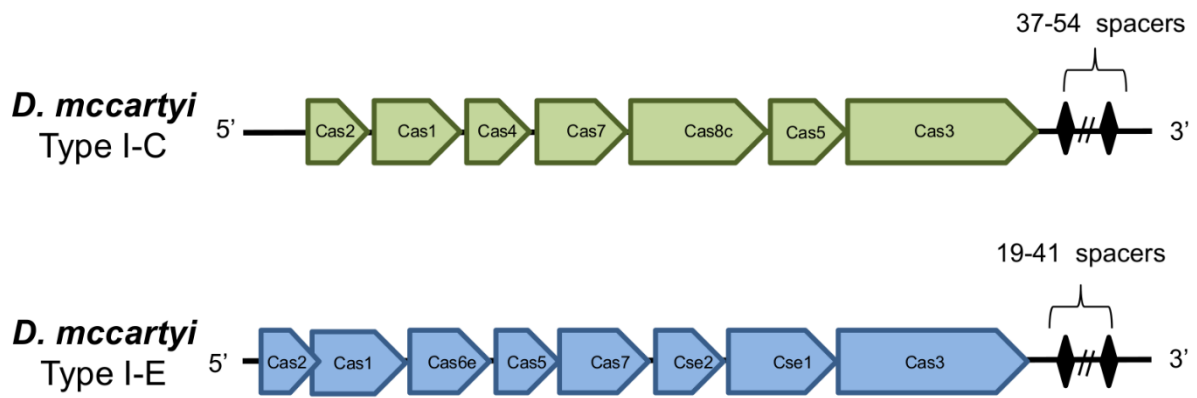

**Figure S3. CRISPR-Cas operon from *D. mccartyi* Type I-E and Type I-C.** Black diamonds indicate repeats in CRISPR array – which differ based on strain (CBDB1, KBVC1, KBDCA3, GT or DMCB5).

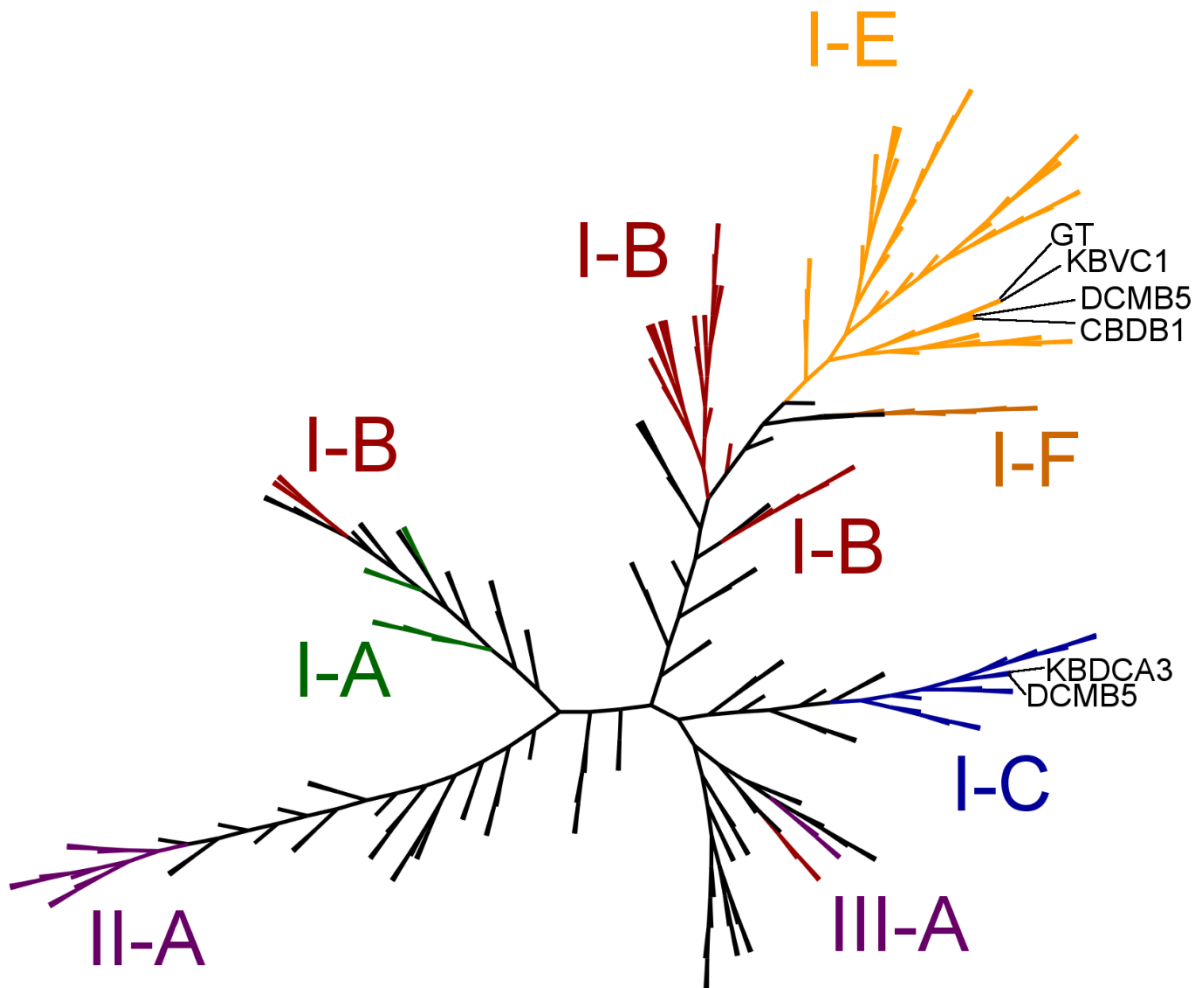

**Figure S4. CRISPR Cas1 maximum likelihood tree constructed from an alignment of 227 Cas1 protein sequences.** Only Cas1 sequences found in closed genomes were used in the alignment. Cas1 come from different types of CRISPR systems. Systems with clear clades are highlighted in different colours and identified by type. *Dehalococcoides mccartyi* Cas1 are type I-E (orange) and I-C (blue) labeled by strain name. Scale shows number of amino acid substitutions per site. Shown is most likely tree of 100 bootstraps.

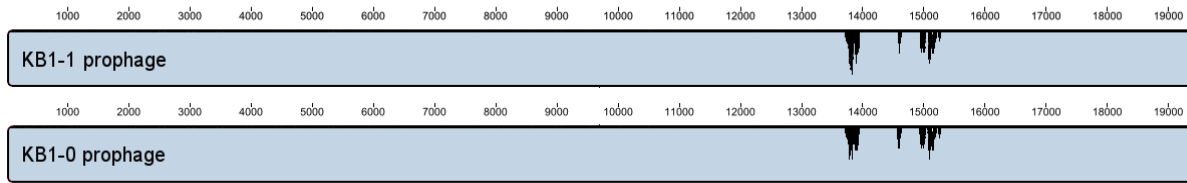

**Figure S5. MAUVE nucleotide sequence alignment diagram between two similar KB-1 prophages.** Prophage KB1/TCE-0 was found in the KB-1/TCE-MeOH culture in 2007 and prophage KBTCE1/VC2-1 was found in the same culture in 2013. Solid block region indicates sequence homology across entire prophage sequence (blue). Sequence similarity profiles (black) correspond to the average level of conservation in the region. The height of the profile is inversely proportional to the average alignment column change over the alignment. In total 71 of 19,420 bp are different which results in 24 amino acid substitutions (based on predicted open reading frames).

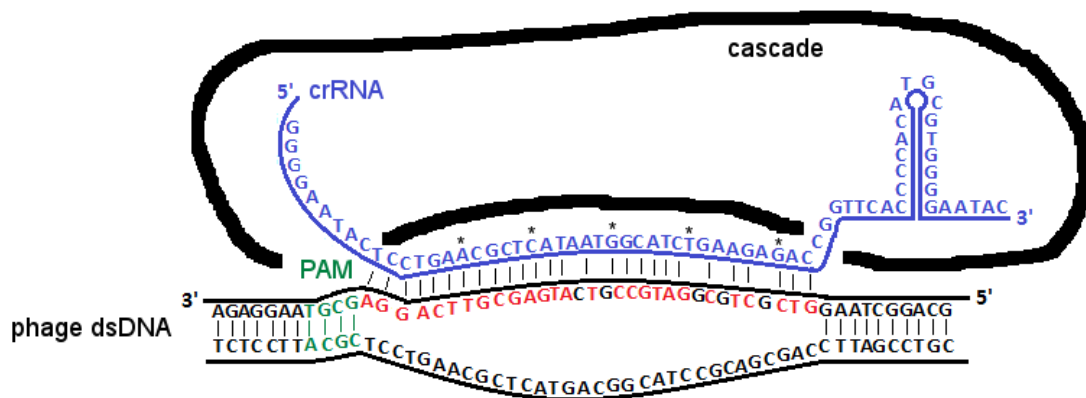

**Figure S6. Representation of *Dehalococcoides mccartyi* KBVC1 CRISPR type I-E Cascade action on prophage target.** *D. mccartyi* crRNA from the CRISPR array from sequencing information is shown in blue. Protospacer adjacent motif (PAM) is shown in green. Matching DNA sequence from prophage KBDCA3-12 is shown in red. Stars indicate positions that were found to readily tolerate mutations in *E. coli* type I-E CRISPR system (3). Due to the small number of mismatches and none in the PAM or seed regions (seed comprises 8-12 PAM-proximal bases), we expect strain KBVC1 CRISPR system to be able to run interference against this prophage.



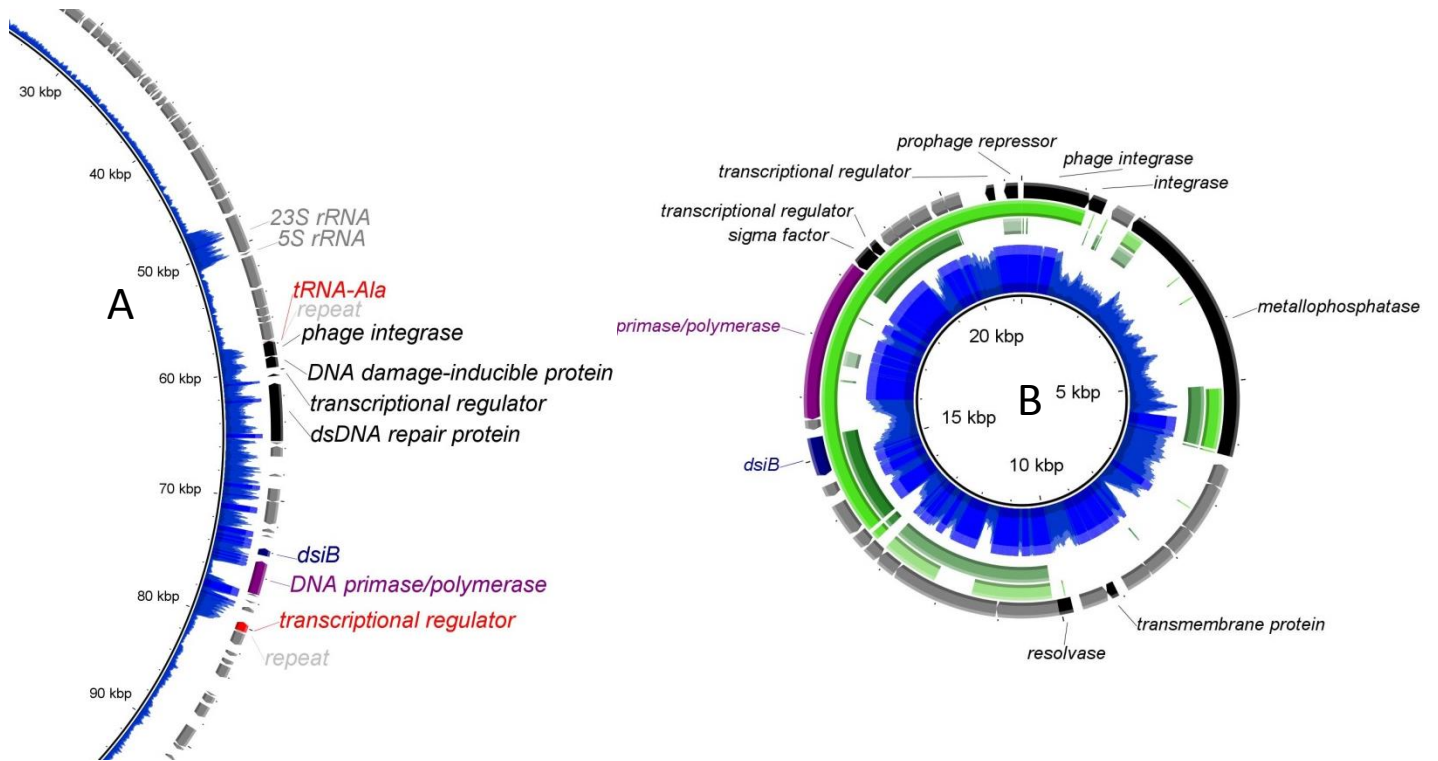

**Figure S7. Metagenomic evidence for circular existence of integrative mobilizable elements (IMEs) in *D. mccartyi*.** (A) Illustration of partial *D. mccartyi* genome (strain KBTCE2) showing high read depth over IME1-8 region (IME1-8). Strain KBTCE2 has average read depth of 100x with ~700x over IME1-8 region. (B) IME1-1 found circularized from metagenomic data (mate-pair and paired-end reads map only to itself). Read depth is shown in blue ranging from 0 to 1000x. (B) Inner dark green circle indicates significant blast hits to IME1-8 and IME1-2 (70-100% lighter to darker). Coding regions are shown as arrows: colored are annotated genes, in black showing conserved domains (domains annotated individually). In (A) 23S and 5S have high read depth due to multiple strains of *D. mccartyi* in this culture and 100% sequence identity across this region among all strains. See Figure 3a in main text for different IMEs found.

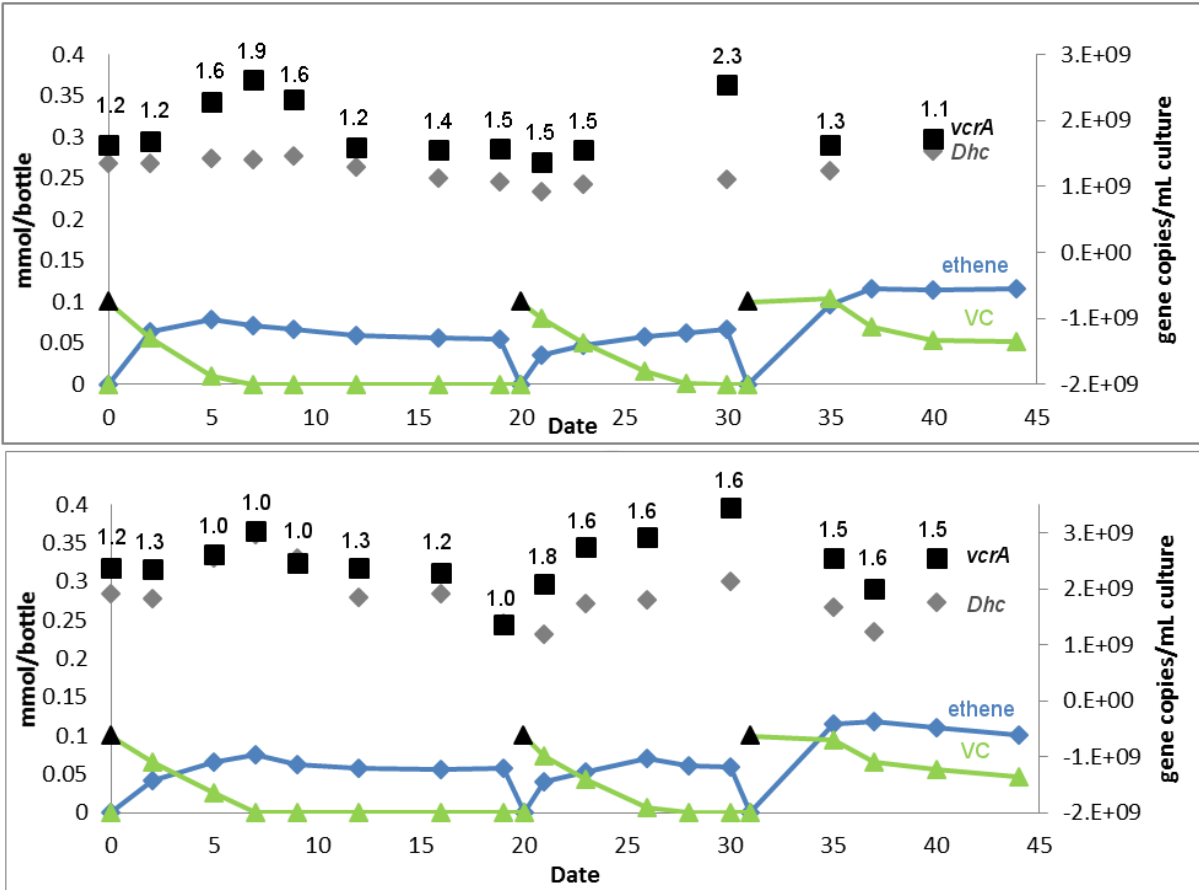

**Figure S8. Quantitative PCR (qPCR) and gas chromatography (GC) tracking of two KB-1/VC-H<sub>2</sub> cultures during routine growth.** Vinyl chloride (VC) is degraded to ethene (left axes). The number of gene copies of *D. mccartyi* 16S rRNA (*Dhc*, grey triangle) vinyl chloride reductase (*vcrA*, black square) tracked using quantitative qPCR (right axes). Cultures were maintained in batch mode, with periodic purging of gases and re-feeding with VC as indicated on graphs with black triangles. Graphs A and B are two of triplicate cultures studied. The third culture can be found in main text Figure 5. All qPCR raw data is in Table S7, standard curves S8.

**Table S1.** Primers used in this study

| Primer Name                  | Direction | Sequence                        | Target                                   | Use        | Annealing temp. (°C) | Reference  |
|------------------------------|-----------|---------------------------------|------------------------------------------|------------|----------------------|------------|
| CRISPR I-E 1f                | f         | 5'-TTGCCCGGTTTCGTCATTA-3'       | Annealing outside CRISPR array           | PCR        | 65                   | This paper |
| CRISPR I-E 4561r             | r         | 5'-GCCAATCCAACCGACCTT-3'        | Annealing outside CRISPR array           | PCR        | 65                   | This paper |
| CRISPR I-E 1f                | f         | 5'-TACCTAGGAGTCAAGCATCG-3'      | Half of CRISPR array                     | PCR        | 59                   | This paper |
| CRISPR I-E 1725r             | r         | 5'-AAAACGCAAATTTCTGACAC-3'      | Half of CRISPR array                     | PCR        | 59                   | This paper |
| <i>Dhc</i> 1f                | f         | 5'-GATGAACGCTAGCGGCG-3'         | <i>D. mccartyi</i> 16S rRNA gene         | qPCR       | 60                   | 1          |
| <i>Dhc</i> 265r              | r         | 5'-CCTCTCAGACCAGCTACCGATCGAA-3' | <i>D. mccartyi</i> 16S rRNA gene         | qPCR       | 60                   | 1          |
| <i>vcrA</i> 670f             | f         | 5'-GCCCTCCAGATGCTCCCTTTAC-3'    | <i>vcrA</i> gene                         | qPCR       | 60                   | 2          |
| <i>vcrA</i> 440r             | r         | 5'-TGCCCTTCCTCACCCTACCAG-3'     | <i>vcrA</i> gene                         | qPCR       | 60                   | 2          |
| <i>vcrA</i> -GI PCR 1 1f     | f         | 5'-CTAGATTCTTAATAAATTCGCGTGT-3' | genome region outside of <i>vcrA</i> -GI | PCR        | 65                   | This paper |
| <i>vcrA</i> -GI PCR 1 19361r | r         | 5'-AAATAACAAATGAGCTCTCAGAAAA-3' | genome region outside of <i>vcrA</i> -GI | PCR        | 65                   | This paper |
| <i>vcrA</i> GI PCR 2 1f      | f         | 5'-GTA AAACTTACCGGGTTGAT-3'     | circular <i>vcrA</i> genomic island      | PCR        | 59.5                 | This paper |
| <i>vcrA</i> GI PCR 2 10426r  | r         | 5'-TTGTTGCTAACACGACTGTT-3'      | circular <i>vcrA</i> genomic island      | PCR        | 59.5                 | This paper |
| seq-1                        | f         | 5'-ACAGGAACGAAGACGAACGGGG-3'    | 100 bp before CRISPR                     | sequencing | n/a                  | This paper |
| seq-2                        | f         | 5'-AGTGCCTACCCTACGAGCAAGG-3'    | 31 bp before CRISPR                      | sequencing | n/a                  | This paper |
| seq-3                        | f         | 5'-ATCGCTAGGGCTTGCCGAACT-3'     | spacer # 6                               | sequencing | n/a                  | This paper |
| seq-1                        | r         | 5'-ACGCTTCGTTCTGGTGGAA-3'       | spacer # 16                              | sequencing | n/a                  | This paper |
| seq-2                        | r         | 5'-GGCGTTTAGACCATTTTCACGC-3'    | spacer # 27                              | sequencing | n/a                  | This paper |
| seq-3                        | r         | 5'-GCGAGTCGTA CTGTATTGAGG-3'    | spacer # 33                              | sequencing | n/a                  | This paper |
| seq-4                        | r         | 5'-ACCAGCACTATCAAAAACGCA-3'     | 48 bp after the end of CRISPR            | sequencing | n/a                  | This paper |
| seq-T3-1348-1f               | f         | 5'-GAGATCTCTCCATGCCCAGC3-3'     | 300 bp after <i>vcrA</i> -GI             | sequencing | n/a                  | This paper |
| seq-T1-1572r                 | r         | 5'-GAGCAGGCTGGGAAACTCAT-3'      | 233 bp after <i>vcrA</i> -GI             | sequencing | n/a                  | This paper |

<sup>1</sup> Hendrickson et al. (2002) AEM 68, 485-495, <sup>2</sup> Molenda et al. (2016) AEM 82,40-50

**Table S2.** General features of *Dehalococcoides mccartyi* genomes. Genomes closed from KB-1 derived enrichment cultures compared with other CRISPR-Cas containing strains GT, CBDB1 and DCMB5.

| Strain                                      | KBVC1                            | GT                                    | CBDB1                           | DCMB5                  | KBDC3                                   |
|---------------------------------------------|----------------------------------|---------------------------------------|---------------------------------|------------------------|-----------------------------------------|
| <b>Origin</b>                               | KB-1VC enrichment S.Ontario, CAN | Cont. aquifer, Cottage Grove, WI, USA | Saale river near Jena, GER      | Bitterfeld region, GER | KB-1 1,2-DCA enrichment S. Ontario, CAN |
| <b>Genome size (Mbp)</b>                    | 1.39                             | 1.36                                  | 1.4                             | 1.43                   | 1.34                                    |
| <b>G+C content (%)</b>                      | 47.3                             | 47                                    | 47                              | 47.1                   | 47.6                                    |
| <b>Protein coding genes</b>                 | 1468                             | 1416                                  | 1460                            | 1458                   | 1404                                    |
| <b>Hypothetical genes (%)</b>               | 31.1                             | 18.6                                  | 28.7                            | 25.4                   | 29.1                                    |
| <b>tRNA</b>                                 | 47                               | 46                                    | 47                              | 46                     | 46                                      |
| <b>Number of Recombinases</b>               | 4                                | 7                                     | 4                               | 7                      | 4                                       |
| <b>Sub-group/Clade</b>                      | Pinellas                         | Pinellas                              | Pinellas                        | Pinellas               | Pinellas                                |
| <b>Chlorinated substrate</b>                | VC                               | TCE                                   | 1,2,3-TCB <sup>1</sup> & 1,2,4- | 1,2,3-TCB              | 1,2-DCA                                 |
| <b>CRISPR-Cas type</b>                      | I-E                              | I-E                                   | I-E                             | I-E & I-C              | I-C                                     |
| <b><i>rdhA</i> genes</b>                    | 22                               | 20                                    | 32                              | 23                     | 9                                       |
| <b>Characterized<sup>2</sup> RDases</b>     | VcrA, PceA                       | VcrA, PceA                            | MbrA, CbrA, PceA                | MbrA, CbrA             | BvcA                                    |
| <b>Genomic position of CRISPR-Cas (kbp)</b> | 1208                             | 1176                                  | 1201                            | 1318 (I-E)             | 276                                     |
|                                             |                                  |                                       |                                 | 97 (I-C)               |                                         |
| <b>No. of CRISPR spacers</b>                | 41                               | 37                                    | 19                              | 28 (I-E)               | 38                                      |
|                                             |                                  |                                       |                                 | 54 (I-C)               |                                         |
| <b>NCBI accession number</b>                | CP019968                         | CP001924                              | AJ965256                        | CP004079               | CP019946                                |

<sup>1</sup>1,2,3-trichlorobenzene (1,2,3-TCB). 1,2,4-trichlorobenzene (1,2,4-TCB) <sup>2</sup> *characterized* indicates any RDase which has been at least partially biochemically characterized, not what is being expressed in culture by each strain.

**Table S3.** Potential targets of *Dehalococcoides mccartyi* KBVC1, KBDCA3, CBDB1, GT and DCMB5 CRISPRs. Results from BLAST searches: (1) against a database of KB-1 prophages and all *D. mccartyi* prophages from NCBI closed genomes and (2) against a database of all *D. mccartyi* genomes. A fasta file with all spacer sequences is provided in supplemental information separately from this excel file. GI: Genomic Island. Hit was listed in table if e-value < 1e<sup>-1</sup>. *rdhA*-containing genomic islands (GI) are highlighted in red. New spacers acquired between 2002 and 2013 are highlighted in blue.

| strain | CRISPR type | spacer # | FASTA name of spacer     | spacer length (bp) | Type of mobile DNA which matched to spacer | <i>D.mccartyi</i> Mobile DNA name | BLAST hit length | % pairwise identity | e-value  | Gene annotation of BLAST hit    | best assignment for spacer |
|--------|-------------|----------|--------------------------|--------------------|--------------------------------------------|-----------------------------------|------------------|---------------------|----------|---------------------------------|----------------------------|
| CBDB1  | I-E         | 1        | CBDB1_AJ965256_spacer_1  | 33                 | prophage                                   | KBTCE1/KBVC2-12 prophage          | 16               | 93.8                | 3.22E-01 | hypothetical protein            | *                          |
| CBDB1  | I-E         | 2        | CBDB1_AJ965256_spacer_2  | 33                 | prophage                                   | KBTCE1/KBVC2-12 prophage          | 13               | 100                 | 3.03E-01 | CBS-domain containing protein   | *                          |
| CBDB1  | I-E         | 3        | CBDB1_AJ965256_spacer_3  | 34                 | IME1                                       | IME1-13                           | 32               | 96.9                | 2.50E-08 | hypothetical protein            | *                          |
| CBDB1  | I-E         | 4        | CBDB1_AJ965256_spacer_4  | 33                 | prophage                                   | BTF08 prophage                    | 13               | 100                 | 3.03E-01 | hypothetical protein            | *                          |
| CBDB1  | I-E         | 4        | CBDB1_AJ965256_spacer_4  | 33                 | prophage                                   | KBTCE1/KBVC2-12 prophage          | 13               | 100                 | 3.03E-01 | hypothetical protein            | *                          |
| CBDB1  | I-E         | 5        | CBDB1_AJ965256_spacer_5  | 33                 | no hits                                    |                                   |                  |                     |          |                                 | *                          |
| CBDB1  | I-E         | 6        | CBDB1_AJ965256_spacer_6  | 33                 | prophage                                   | CG1 prophage                      | 32               | 93.8                | 7.60E-09 | endolysin                       | *                          |
| CBDB1  | I-E         | 6        | CBDB1_AJ965256_spacer_6  | 33                 | prophage                                   | 195 prophage                      | 18               | 88.9                | 3.03E-01 | hypothetical protein            | *                          |
| CBDB1  | I-E         | 6        | CBDB1_AJ965256_spacer_6  | 33                 | prophage                                   | 195 prophage                      | 21               | 85.7                | 3.03E-01 | hypothetical protein            | *                          |
| CBDB1  | I-E         | 7        | CBDB1_AJ965256_spacer_7  | 33                 | no hits                                    |                                   |                  |                     |          |                                 | *                          |
| CBDB1  | I-E         | 8        | CBDB1_AJ965256_spacer_8  | 33                 | no hits                                    |                                   |                  |                     |          |                                 | *                          |
| CBDB1  | I-E         | 9        | CBDB1_AJ965256_spacer_9  | 34                 | IME1                                       | IME1-9                            | 33               | 97                  | 7.81E-09 | hypothetical protein            | *                          |
| CBDB1  | I-E         | 10       | CBDB1_AJ965256_spacer_10 | 33                 | prophage                                   | BTF08 prophage                    | 25               | 96                  | 3.94E-06 | hypothetical protein            | *                          |
| CBDB1  | I-E         | 10       | CBDB1_AJ965256_spacer_10 | 33                 | prophage                                   | CG1 prophage                      | 33               | 97                  | 1.79E-10 | hypothetical protein            | *                          |
| CBDB1  | I-E         | 10       | CBDB1_AJ965256_spacer_10 | 33                 | prophage                                   | pg11a5 prophage                   | 25               | 96                  | 3.94E-06 | hypothetical protein            | *                          |
| CBDB1  | I-E         | 10       | CBDB1_AJ965256_spacer_10 | 33                 | prophage                                   | KB1/cDCE-4 prophage               | 33               | 87.9                | 1.13E-06 | non-coding hypothetical protein | *                          |
| CBDB1  | I-E         | 10       | CBDB1_AJ965256_spacer_10 | 33                 | prophage                                   | KB1/TCE-0 prophage                | 33               | 87.9                | 1.13E-06 | hypothetical protein            | *                          |
| CBDB1  | I-E         | 10       | CBDB1_AJ965256_spacer_10 | 33                 | prophage                                   | KBDCA1/KBDCA2-6 prophage          | 33               | 87.9                | 1.13E-06 | hypothetical protein            | *                          |
| CBDB1  | I-E         | 10       | CBDB1_AJ965256_spacer_10 | 33                 | prophage                                   | KBTCE1/KBVC2-1 prophage           | 33               | 87.9                | 1.13E-06 | hypothetical protein            | *                          |

|       |     |    |                             |    |          |                          |    |      |          |                      |   |
|-------|-----|----|-----------------------------|----|----------|--------------------------|----|------|----------|----------------------|---|
| CBDB1 | I-E | 10 | CBDB1_AJ965256_spacer_10    | 33 | prophage | KBTCE1/KBVC2-5 prophage  | 33 | 87.9 | 1.13E-06 | hypothetical protein |   |
| CBDB1 | I-E | 11 | CBDB1_AJ965256_spacer_11    | 34 | prophage | CG1 prophage             | 27 | 92.6 | 1.61E-04 | hypothetical protein | * |
| CBDB1 | I-E | 12 | CBDB1_AJ965256_spacer_12    | 34 | prophage | KBTCE1/KBVC2-11 prophage | 13 | 100  | 3.22E-01 | phage antirepressor  | * |
| CBDB1 | I-E | 13 | CBDB1_AJ965256_spacer_13    | 33 | prophage | CG3 prophage             | 32 | 96.9 | 6.24E-10 | non-coding           |   |
| CBDB1 | I-E | 13 | CBDB1_AJ965256_spacer_13    | 33 | prophage | KB1/cDCE-8 prophage      | 33 | 100  | 4.10E-12 | hypothetical protein | * |
| CBDB1 | I-E | 14 | CBDB1_AJ965256_spacer_14    | 33 | no hits  |                          |    |      |          |                      | * |
| CBDB1 | I-E | 15 | CBDB1_AJ965256_spacer_15    | 33 | no hits  |                          |    |      |          |                      | * |
| CBDB1 | I-E | 16 | CBDB1_AJ965256_spacer_16    | 33 | prophage | KBTCE1/KBVC2-10 prophage | 13 | 100  | 3.03E-01 | phage tail protein   | * |
| CBDB1 | I-E | 17 | CBDB1_AJ965256_spacer_17    | 33 | prophage | WBC-2 prophage           | 13 | 100  | 3.03E-01 | non-coding           | * |
| CBDB1 | I-E | 17 | CBDB1_AJ965256_spacer_17    | 33 | prophage | KBDCA1-9 prophage        | 13 | 100  | 3.03E-01 | RNA polymerase       |   |
| CBDB1 | I-E | 17 | CBDB1_AJ965256_spacer_17    | 33 | prophage | KBTCE1/KBVC2-10 prophage | 13 | 100  | 3.03E-01 | RNA polymerase       |   |
| CBDB1 | I-E | 18 | CBDB1_AJ965256_spacer_18    | 33 | IME1     | IME1-10                  | 33 | 93.9 | 8.22E-08 | non-coding           |   |
| CBDB1 | I-E | 18 | CBDB1_AJ965256_spacer_18    | 33 | IME1     | IME1-11                  | 33 | 93.9 | 8.22E-08 | hypothetical protein |   |
| CBDB1 | I-E | 18 | CBDB1_AJ965256_spacer_18    | 33 | IME1     | IME1-12                  | 33 | 97   | 8.22E-08 | non-coding           |   |
| CBDB1 | I-E | 18 | CBDB1_AJ965256_spacer_18    | 33 | IME1     | IME1-13                  | 33 | 100  | 6.74E-09 | non-coding           | * |
| CBDB1 | I-E | 19 | CBDB1_AJ965256_spacer_19    | 33 | prophage | pg1a5 prophage           | 33 | 100  | 4.2E-12  | hypothetical protein |   |
| CBDB1 | I-E | 19 | CBDB1_AJ965256_spacer_19    | 33 | prophage | KB1/TCE-0 prophage       | 33 | 100  | 4.2E-12  | hypothetical protein | * |
| CBDB1 | I-E | 19 | CBDB1_AJ965256_spacer_19    | 33 | prophage | KBDCA1/KBDCA2-6 prophage | 33 | 100  | 4.2E-12  | hypothetical protein |   |
| CBDB1 | I-E | 19 | CBDB1_AJ965256_spacer_19    | 33 | prophage | KBTCE1/KBVC2-1 prophage  | 33 | 100  | 4.2E-12  | hypothetical protein |   |
| CBDB1 | I-E | 19 | CBDB1_AJ965256_spacer_19    | 33 | prophage | KBTCE1/KBVC2-5 prophage  | 33 | 100  | 4.2E-12  | hypothetical protein |   |
| DCMB5 | I-C | 1  | DCMB5_CP004079_I-C_spacer_1 | 36 | prophage | KBTCE1/KBVC2-12 prophage | 25 | 84   | 2.95E-02 | non-coding           | * |
| DCMB5 | I-E | 1  | DCMB5_CP004079_I-E_spacer_1 | 33 | no hits  |                          |    |      |          |                      | * |
| DCMB5 | I-C | 2  | DCMB5_CP004079_I-C_spacer_2 | 35 | no hits  |                          |    |      |          |                      | * |
| DCMB5 | I-E | 2  | DCMB5_CP004079_I-E_spacer_2 | 33 | no hits  |                          |    |      |          |                      | * |
| DCMB5 | I-C | 3  | DCMB5_CP004079_I-C_spacer_3 | 33 | no hits  |                          |    |      |          |                      | * |
| DCMB5 | I-E | 3  | DCMB5_CP004079_I-E_spacer_3 | 33 | no hits  |                          |    |      |          |                      | * |
| DCMB5 | I-C | 4  | DCMB5_CP004079_I-C_spacer_4 | 34 | no hits  |                          |    |      |          |                      | * |
| DCMB5 | I-E | 4  | DCMB5_CP004079_I-E_spacer_4 | 33 | no hits  |                          |    |      |          |                      | * |
| DCMB5 | I-E | 5  | DCMB5_CP004079_I-E_spacer_5 | 33 | IME1     | IME1-13                  | 32 | 100  | 7.70E-02 | hypothetical protein | * |
| DCMB5 | I-C | 5  | DCMB5_CP004079_I-C_spacer_5 | 34 | no hits  |                          |    |      |          |                      | * |

|       |     |    |                              |    |          |                          |    |     |          |                                 |   |
|-------|-----|----|------------------------------|----|----------|--------------------------|----|-----|----------|---------------------------------|---|
| DCMB5 | I-E | 6  | DCMB5_CP004079_I-E_spacer_6  | 33 | prophage | KB1/cDCE-4 prophage      | 33 | 100 | 4.20E-12 | phage tail tape measure         |   |
| DCMB5 | I-E | 6  | DCMB5_CP004079_I-E_spacer_6  | 33 | prophage | KB1/cDCE-7 prophage      | 33 | 100 | 4.20E-12 | phage tail tape measure         |   |
| DCMB5 | I-E | 6  | DCMB5_CP004079_I-E_spacer_6  | 33 | prophage | KB1/TCE-0 prophage       | 33 | 100 | 4.20E-12 | phage tail tape measure         | * |
| DCMB5 | I-E | 6  | DCMB5_CP004079_I-E_spacer_6  | 33 | prophage | KBDCA1/KBDCA2-6 prophage | 33 | 100 | 4.20E-12 | phage tail tape measure         |   |
| DCMB5 | I-E | 6  | DCMB5_CP004079_I-E_spacer_6  | 33 | prophage | KBTC1/KBVC2-1 prophage   | 33 | 100 | 4.20E-12 | phage tail tape measure         |   |
| DCMB5 | I-E | 6  | DCMB5_CP004079_I-E_spacer_6  | 33 | prophage | KBTC1/KBVC2-5 prophage   | 33 | 100 | 4.20E-12 | phage tail tape measure         |   |
| DCMB5 | I-C | 6  | DCMB5_CP004079_I-C_spacer_6  | 34 | no hits  |                          |    |     |          |                                 | * |
| DCMB5 | I-C | 7  | DCMB5_CP004079_I-C_spacer_7  | 32 | prophage | WBC-2 prophage           | 13 | 100 | 2.84E-01 | s-adenosylmethionine synthetase | * |
| DCMB5 | I-C | 7  | DCMB5_CP004079_I-C_spacer_7  | 32 | prophage | KBTC1/KBVC2-12 prophage  | 12 | 100 | 9.90E-01 | phage integrase                 |   |
| DCMB5 | I-C | 7  | DCMB5_CP004079_I-C_spacer_7  | 32 | prophage | KBTC2-2 prophage         | 12 | 100 | 9.90E-01 | phage terminase                 |   |
| DCMB5 | I-C | 7  | DCMB5_CP004079_I-C_spacer_7  | 32 | prophage | KBTC3-3 prophage         | 12 | 100 | 9.90E-01 | phage terminase                 |   |
| DCMB5 | I-E | 7  | DCMB5_CP004079_I-E_spacer_7  | 33 | no hits  |                          |    |     |          |                                 | * |
| DCMB5 | I-E | 8  | DCMB5_CP004079_I-E_spacer_8  | 33 | prophage | KB1/cDCE-8 prophage      | 33 | 100 | 4.20E-12 | hypothetical protein            | * |
| DCMB5 | I-C | 8  | DCMB5_CP004079_I-C_spacer_8  | 35 | no hits  |                          |    |     |          |                                 | * |
| DCMB5 | I-E | 9  | DCMB5_CP004079_I-E_spacer_9  | 33 | IME1     | IME1-12                  | 33 | 100 | 1.59E-10 | hypothetical protein            | * |
| DCMB5 | I-E | 9  | DCMB5_CP004079_I-E_spacer_9  | 33 | IME1     | IME1-8                   | 31 | 100 | 1.93E-09 | non-coding                      |   |
| DCMB5 | I-E | 9  | DCMB5_CP004079_I-E_spacer_9  | 33 | IME1     | IME1-9                   | 33 | 100 | 1.59E-10 | hypothetical protein            |   |
| DCMB5 | I-E | 9  | DCMB5_CP004079_I-E_spacer_9  | 33 | IME1     | IME1-13                  | 33 | 100 | 1.59E-10 | hypothetical protein            |   |
| DCMB5 | I-C | 9  | DCMB5_CP004079_I-C_spacer_9  | 35 | prophage | BTF08 prophage           | 13 | 100 | 3.40E-01 | DNA polymerase                  | * |
| DCMB5 | I-E | 9  | DCMB5_CP004079_I-E_spacer_9  | 33 | no hits  |                          |    |     |          |                                 | * |
| DCMB5 | I-E | 10 | DCMB5_CP004079_I-E_spacer_10 | 33 | prophage | KBTC2-2 prophage         | 13 | 13  | 3.03E-01 | phage intergrase                | * |
| DCMB5 | I-E | 10 | DCMB5_CP004079_I-E_spacer_10 | 33 | prophage | KBTC3-3 prophage         | 13 | 13  | 3.03E-01 | phage intergrase                |   |
| DCMB5 | I-C | 10 | DCMB5_CP004079_I-C_spacer_10 | 35 | IME1     | IME1-10                  | 35 | 100 | 1.41E-11 | hypothetical protein            | * |
| DCMB5 | I-C | 10 | DCMB5_CP004079_I-C_spacer_10 | 35 | IME1     | IME1-8                   | 35 | 100 | 1.41E-11 | hypothetical protein            |   |
| DCMB5 | I-C | 10 | DCMB5_CP004079_I-C_spacer_10 | 35 | IME1     | IME1-8                   | 17 | 100 | 8.34E-02 | hypothetical protein            |   |
| DCMB5 | I-C | 10 | DCMB5_CP004079_I-C_spacer_10 | 35 | IME1     | IME1-13                  | 35 | 100 | 1.41E-11 | hypothetical protein            |   |
| DCMB5 | I-C | 11 | DCMB5_CP004079_I-C_spacer_11 | 32 | no hits  |                          |    |     |          |                                 | * |

|       |     |    |                              |    |                 |                       |    |      |          |                 |   |
|-------|-----|----|------------------------------|----|-----------------|-----------------------|----|------|----------|-----------------|---|
| DCMB5 | I-E | 11 | DCMB5_CP004079_I-E_spacer_11 | 33 | no hits         |                       |    |      |          |                 | * |
| DCMB5 | I-E | 12 | DCMB5_CP004079_I-E_spacer_12 | 33 | prophage        | BTF08 prophage        | 31 | 83.9 | 5.84E-04 | portal protein  | * |
|       |     |    |                              | 33 |                 | KBTCE1/KBVC2-12       |    |      |          | hypothetical    |   |
| DCMB5 | I-E | 12 | DCMB5_CP004079_I-E_spacer_12 | 33 | prophage        | prophage              | 31 | 83.9 | 5.84E-04 | protein         | * |
| DCMB5 | I-C | 12 | DCMB5_CP004079_I-C_spacer_12 | 30 | no hits         |                       |    |      |          |                 | * |
|       |     |    |                              | 33 |                 | KBTCE1/KBVC2-11       |    |      |          |                 |   |
| DCMB5 | I-E | 13 | DCMB5_CP004079_I-E_spacer_13 | 33 | prophage        | prophage              | 12 | 100  | 3.03E-01 | DNA primase     | * |
| DCMB5 | I-C | 13 | DCMB5_CP004079_I-C_spacer_13 | 34 | no hits         |                       |    |      |          |                 | * |
| DCMB5 | I-E | 14 | DCMB5_CP004079_I-E_spacer_14 | 33 | prophage        | BTF08 prophage        | 21 | 90.5 | 8.67E-02 | nuclease        |   |
| DCMB5 | I-E | 14 | DCMB5_CP004079_I-E_spacer_14 | 33 | prophage        | KBDCA1-9 prophage     | 13 | 100  | 3.03E-01 | nuclease        |   |
|       |     |    |                              | 33 |                 | KBTCE1/KBVC2-10       |    |      |          | hypothetical    |   |
| DCMB5 | I-E | 14 | DCMB5_CP004079_I-E_spacer_14 | 33 | prophage        | prophage              | 13 | 100  | 3.03E-01 | protein         | * |
| DCMB5 | I-C | 14 | DCMB5_CP004079_I-C_spacer_14 | 34 | no hits         |                       |    |      |          |                 | * |
|       |     |    |                              | 34 |                 | KB1/cDCE-4 prophage   | 13 | 100  | 3.22E-01 | hypothetical    |   |
| DCMB5 | I-C | 15 | DCMB5_CP004079_I-C_spacer_15 | 34 | prophage        | prophage              | 13 | 100  | 3.22E-01 | protein         | * |
|       |     |    |                              | 34 |                 | KB1/cDCE-7 prophage   | 13 | 100  | 3.22E-01 | hypothetical    |   |
| DCMB5 | I-C | 15 | DCMB5_CP004079_I-C_spacer_15 | 34 | prophage        | prophage              | 13 | 100  | 3.22E-01 | protein         | * |
| DCMB5 | I-E | 15 | DCMB5_CP004079_I-E_spacer_15 | 33 | no hits         |                       |    |      |          |                 | * |
| DCMB5 | I-C | 16 | DCMB5_CP004079_I-C_spacer_16 | 35 | no hits         |                       |    |      |          |                 | * |
| DCMB5 | I-E | 16 | DCMB5_CP004079_I-E_spacer_16 | 33 | no hits         |                       |    |      |          |                 | * |
|       |     |    |                              | 33 |                 | BTF08 prophage        | 18 | 94.4 | 2.48E-02 | DNA polymerase  |   |
| DCMB5 | I-E | 17 | DCMB5_CP004079_I-E_spacer_17 | 33 | prophage        | CG1 prophage          | 33 | 93.9 | 2.18E-09 | phage terminase |   |
| DCMB5 | I-E | 17 | DCMB5_CP004079_I-E_spacer_17 | 33 | prophage        | CG3 prophage          | 33 | 93.9 | 2.18E-09 | protein         |   |
| DCMB5 | I-E | 17 | DCMB5_CP004079_I-E_spacer_17 | 33 | IME- <i>vrA</i> | IME- <i>vrA</i> GT    | 13 | 100  | 5.36E-02 | dsiB            | * |
| DCMB5 | I-E | 17 | DCMB5_CP004079_I-E_spacer_17 | 33 | IME- <i>vrA</i> | IME- <i>vrA</i> KBVC1 | 13 | 100  | 5.36E-02 | dsiB            |   |
| DCMB5 | I-E | 17 | DCMB5_CP004079_I-E_spacer_17 | 33 | IME- <i>vrA</i> | IME- <i>vrA</i> VS    | 13 | 100  | 5.36E-02 | dsiB            |   |
| DCMB5 | I-C | 17 | DCMB5_CP004079_I-C_spacer_17 | 37 | no hits         |                       |    |      |          |                 | * |
| DCMB5 | I-C | 18 | DCMB5_CP004079_I-C_spacer_18 | 36 | no hits         |                       |    |      |          |                 | * |
| DCMB5 | I-E | 18 | DCMB5_CP004079_I-E_spacer_18 | 33 | no hits         |                       |    |      |          |                 | * |
| DCMB5 | I-C | 19 | DCMB5_CP004079_I-C_spacer_19 | 37 | no hits         |                       |    |      |          |                 | * |
| DCMB5 | I-E | 19 | DCMB5_CP004079_I-E_spacer_19 | 33 | no hits         |                       |    |      |          |                 | * |
|       |     |    |                              | 34 |                 | KBTCE1/KBVC2-1        |    |      |          | hypothetical    |   |
| DCMB5 | I-E | 20 | DCMB5_CP004079_I-E_spacer_20 | 34 | prophage        | prophage              | 34 | 100  | 4.92E-11 | protein         |   |
|       |     |    |                              | 34 |                 | KBTCE1/KBVC2-11       |    |      |          | hypothetical    |   |
| DCMB5 | I-E | 20 | DCMB5_CP004079_I-E_spacer_20 | 34 | prophage        | prophage              | 34 | 100  | 4.92E-11 | protein         |   |
|       |     |    |                              | 36 |                 | IME1-10               | 36 | 91.7 | 9.59E-08 | hypothetical    |   |
| DCMB5 | I-C | 20 | DCMB5_CP004079_I-C_spacer_20 | 36 | IME1            | IME1-10               | 36 | 91.7 | 9.59E-08 | protein         | * |
|       |     |    |                              | 36 |                 | IME1-11               | 36 | 91.7 | 9.59E-08 | hypothetical    |   |
| DCMB5 | I-C | 20 | DCMB5_CP004079_I-C_spacer_20 | 36 | IME1            | IME1-11               | 36 | 91.7 | 9.59E-08 | protein         |   |
|       |     |    |                              | 36 |                 | IME1-10               | 36 | 91.7 | 9.59E-08 | hypothetical    |   |
| DCMB5 | I-C | 20 | DCMB5_CP004079_I-C_spacer_20 | 36 | IME1            | IME1-10               | 36 | 91.7 | 9.59E-08 | protein         |   |
| DCMB5 | I-C | 21 | DCMB5_CP004079_I-C_spacer_21 | 33 | no hits         |                       |    |      |          |                 | * |
| DCMB5 | I-E | 21 | DCMB5_CP004079_I-E_spacer_21 | 34 | no hits         |                       |    |      |          |                 | * |



|       |     |    |                              |    |                 |                          |    |      |          |                      |   |
|-------|-----|----|------------------------------|----|-----------------|--------------------------|----|------|----------|----------------------|---|
| DCMB5 | I-E | 22 | DCMB5_CP004079_I-E_spacer_22 | 33 | prophage        | CG1 prophage             | 31 | 100  | 5.12E-11 | prohead protease     | * |
| DCMB5 | I-E | 22 | DCMB5_CP004079_I-E_spacer_22 | 33 | prophage        | CG3 prophage             | 26 | 88.5 | 5.84E-04 | hypothetical protein | * |
| DCMB5 | I-C | 22 | DCMB5_CP004079_I-C_spacer_22 | 33 | no hits         |                          |    |      |          |                      | * |
| DCMB5 | I-C | 23 | DCMB5_CP004079_I-C_spacer_23 | 33 | unknown GI      | KBDCA1                   | 27 | 85.2 | 7.70E-01 | hypothetical protein | * |
| DCMB5 | I-C | 23 | DCMB5_CP004079_I-C_spacer_23 | 33 | unknown GI      | KBDCA2                   | 27 | 85.2 | 7.70E-01 | hypothetical protein | * |
| DCMB5 | I-E | 23 | DCMB5_CP004079_I-E_spacer_23 | 33 | no hits         |                          |    |      |          |                      | * |
| DCMB5 | I-C | 24 | DCMB5_CP004079_I-C_spacer_24 | 32 | IME-OG19        | IME-OG19 CG1             | 22 | 90.9 | 7.05E-02 | <i>rdhA</i> OG19     | * |
| DCMB5 | I-C | 24 | DCMB5_CP004079_I-C_spacer_24 | 32 | IME-OG19        | IME-OG19 VS              | 22 | 90.9 | 7.05E-02 | <i>rdhA</i> OG19     | * |
| DCMB5 | I-E | 24 | DCMB5_CP004079_I-E_spacer_24 | 33 | no hits         |                          |    |      |          |                      | * |
| DCMB5 | I-E | 25 | DCMB5_CP004079_I-E_spacer_25 | 33 | prophage        | KBDCA1-9 prophage        | 25 | 84   | 3.03E-01 | hypothetical protein |   |
| DCMB5 | I-E | 25 | DCMB5_CP004079_I-E_spacer_25 | 33 | prophage        | KBTCE1/KBVC2-10 prophage | 25 | 84   | 3.03E-01 | hypothetical protein |   |
| DCMB5 | I-E | 25 | DCMB5_CP004079_I-E_spacer_25 | 33 | prophage        | KBTCE1/KBVC2-11 prophage | 25 | 84   | 3.03E-01 | hypothetical protein |   |
| DCMB5 | I-E | 25 | DCMB5_CP004079_I-E_spacer_25 | 33 | IME- <i>vrA</i> | IME- <i>vrA</i> KBVC1    | 12 | 100  | 1.87E-01 | hypr-nap             | * |
| DCMB5 | I-C | 25 | DCMB5_CP004079_I-C_spacer_25 | 34 | prophage        | 195 prophage             | 13 | 100  | 3.22E-01 | phage terminase      | * |
| DCMB5 | I-C | 26 | DCMB5_CP004079_I-C_spacer_26 | 34 | no hits         |                          |    |      |          |                      | * |
| DCMB5 | I-E | 26 | DCMB5_CP004079_I-E_spacer_26 | 33 | no hits         |                          |    |      |          |                      | * |
| DCMB5 | I-E | 27 | DCMB5_CP004079_I-E_spacer_27 | 33 | prophage        | CG3 prophage             | 32 | 90.6 | 3.32E-07 | hypothetical protein |   |
| DCMB5 | I-C | 27 | DCMB5_CP004079_I-C_spacer_27 | 34 | prophage        | KBTCE1/KBVC2-10 prophage | 18 | 94.4 | 3.22E-01 | non-coding           | * |
| DCMB5 | I-E | 28 | DCMB5_CP004079_I-E_spacer_28 | 33 | prophage        | CG1 prophage             | 33 | 90.6 | 9.26E-08 | portal protein       | * |
| DCMB5 | I-C | 28 | DCMB5_CP004079_I-C_spacer_28 | 36 | no hits         |                          |    |      |          |                      | * |
| DCMB5 | I-C | 29 | DCMB5_CP004079_I-C_spacer_29 | 33 | prophage        | KBTCE1/KBVC2-11 prophage | 13 | 100  | 3.03E-01 | hypothetical protein | * |
| DCMB5 | I-C | 30 | DCMB5_CP004079_I-C_spacer_30 | 35 | prophage        | BTF08 prophage           | 13 | 100  | 3.40E-01 | hypothetical protein | * |
| DCMB5 | I-C | 31 | DCMB5_CP004079_I-C_spacer_31 | 34 | no hits         |                          |    |      |          |                      | * |
| DCMB5 | I-C | 32 | DCMB5_CP004079_I-C_spacer_32 | 35 | IME1            | IME1-10                  | 35 | 85.7 | 1.61E-04 | hypothetical protein | * |
| DCMB5 | I-C | 32 | DCMB5_CP004079_I-C_spacer_32 | 35 | IME1            | IME1-8                   | 35 | 85.7 | 1.61E-04 | hypothetical protein | * |
| DCMB5 | I-C | 32 | DCMB5_CP004079_I-C_spacer_32 | 35 | IME1            | IME1-13                  | 35 | 85.7 | 1.61E-04 | hypothetical protein | * |
| DCMB5 | I-C | 33 | DCMB5_CP004079_I-C_spacer_33 | 36 | unknown GI      | GT                       | 18 | 100  | 2.57E-02 | peptidase            |   |
| DCMB5 | I-C | 33 | DCMB5_CP004079_I-C_spacer_33 | 36 | unknown target  | WBC-2                    | 18 | 100  | 2.57E-02 | TldD                 |   |
| DCMB5 | I-C | 33 | DCMB5_CP004079_I-C_spacer_33 | 36 | unknown GI      | 11a5-GI                  | 18 | 100  | 2.57E-02 | TldD                 | * |
| DCMB5 | I-C | 34 | DCMB5_CP004079_I-C_spacer_34 | 35 | no hits         |                          |    |      |          |                      | * |
| DCMB5 | I-C | 35 | DCMB5_CP004079_I-C_spacer_35 | 34 | no hits         |                          |    |      |          |                      | * |

|       |     |    |                              |    |          |                          |    |      |          |                                    |   |
|-------|-----|----|------------------------------|----|----------|--------------------------|----|------|----------|------------------------------------|---|
| DCMB5 | I-C | 36 | DCMB5_CP004079_I-C_spacer_36 | 32 | prophage | KB1/cDCE-7 prophage      | 18 | 94.4 | 2.84E-01 | hypothetical protein               |   |
| DCMB5 | I-C | 36 | DCMB5_CP004079_I-C_spacer_36 | 32 | prophage | KB1/TCE-0 prophage       | 18 | 94.4 | 2.84E-01 | hypothetical protein               |   |
| DCMB5 | I-C | 36 | DCMB5_CP004079_I-C_spacer_36 | 32 | prophage | KBDCA1/KBDCA2-6 prophage | 18 | 94.4 | 2.84E-01 | hypothetical protein               |   |
| DCMB5 | I-C | 36 | DCMB5_CP004079_I-C_spacer_36 | 32 | prophage | KBTCE1/KBVC2-1 prophage  | 18 | 94.4 | 2.84E-01 | AMP-binding protein                |   |
| DCMB5 | I-C | 36 | DCMB5_CP004079_I-C_spacer_36 | 32 | prophage | KBTCE1/KBVC2-12 prophage | 13 | 100  | 2.84E-01 | hypothetical protein               | * |
| DCMB5 | I-C | 36 | DCMB5_CP004079_I-C_spacer_36 | 32 | prophage | KBTCE1/KBVC2-5 prophage  | 18 | 94.4 | 2.84E-01 | hypothetical protein               |   |
| DCMB5 | I-C | 37 | DCMB5_CP004079_I-C_spacer_37 | 35 | IME1     | IME1-13                  | 23 | 100  | 4.61E-05 | hypothetical protein               | * |
| DCMB5 | I-C | 38 | DCMB5_CP004079_I-C_spacer_38 | 35 | no hits  |                          |    |      |          |                                    | * |
| DCMB5 | I-C | 39 | DCMB5_CP004079_I-C_spacer_39 | 34 | no hits  |                          |    |      |          |                                    | * |
| DCMB5 | I-C | 40 | DCMB5_CP004079_I-C_spacer_40 | 32 | prophage | pg11a5 prophage          | 18 | 94.4 | 2.84E-01 | hypothetical protein               | * |
| DCMB5 | I-C | 41 | DCMB5_CP004079_I-C_spacer_41 | 33 | IME1     | IME1-10                  | 30 | 80   | 9.37E-01 | hypothetical protein               | * |
| DCMB5 | I-C | 41 | DCMB5_CP004079_I-C_spacer_41 | 33 | IME1     | IME1-8                   | 30 | 80   | 9.37E-01 | hypothetical protein               |   |
| DCMB5 | I-C | 42 | DCMB5_CP004079_I-C_spacer_42 | 32 | prophage | BTF08 prophage           | 17 | 88.2 | 9.90E-01 | hypothetical protein               | * |
| DCMB5 | I-C | 42 | DCMB5_CP004079_I-C_spacer_42 | 32 | prophage | WBC-2 prophage           | 17 | 88.2 | 9.90E-01 | hypothetical protein               |   |
| DCMB5 | I-C | 43 | DCMB5_CP004079_I-C_spacer_43 | 31 | prophage | BTF08 prophage           | 16 | 93.8 | 2.65E-01 | hypothetical protein               | * |
| DCMB5 | I-C | 43 | DCMB5_CP004079_I-C_spacer_43 | 31 | prophage | KBTCE2-2 prophage        | 16 | 93.8 | 2.65E-01 | hypothetical protein               |   |
| DCMB5 | I-C | 43 | DCMB5_CP004079_I-C_spacer_43 | 31 | prophage | KBTCE3-3 prophage        | 16 | 93.8 | 2.65E-01 | hypothetical protein               |   |
| DCMB5 | I-C | 44 | DCMB5_CP004079_I-C_spacer_44 | 36 | prophage | 195 prophage             | 13 | 100  | 3.59E-01 | adenine-specific methyltransferase | * |
| DCMB5 | I-C | 45 | DCMB5_CP004079_I-C_spacer_45 | 35 | no hits  |                          |    |      |          |                                    | * |
| DCMB5 | I-C | 46 | DCMB5_CP004079_I-C_spacer_46 | 36 | prophage | pg11a5 prophage          | 36 | 97.2 | 4.99E-12 | hypothetical protein               | * |
| DCMB5 | I-C | 46 | DCMB5_CP004079_I-C_spacer_46 | 36 | prophage | KB1/cDCE-4 prophage      | 36 | 97.2 | 4.99E-12 | hypothetical protein               |   |
| DCMB5 | I-C | 46 | DCMB5_CP004079_I-C_spacer_46 | 36 | prophage | KB1/cDCE-7 prophage      | 36 | 97.2 | 4.99E-12 | hypothetical protein               |   |
| DCMB5 | I-C | 47 | DCMB5_CP004079_I-C_spacer_47 | 35 | prophage | CG1 prophage             | 31 | 87.1 | 1.55E-05 | hypothetical protein               |   |

|       |     |    |                              |    |          |                             |    |      |          |                                    |   |
|-------|-----|----|------------------------------|----|----------|-----------------------------|----|------|----------|------------------------------------|---|
| DCMB5 | I-C | 47 | DCMB5_CP004079_I-C_spacer_47 | 35 | prophage | CG3 prophage                | 32 | 87.5 | 4.43E-06 | phage major capsid<br>hypothetical |   |
| DCMB5 | I-C | 47 | DCMB5_CP004079_I-C_spacer_47 | 35 | prophage | 195 prophage                | 13 | 100  | 3.40E-01 | protein                            | * |
| DCMB5 | I-C | 48 | DCMB5_CP004079_I-C_spacer_48 | 34 | no hits  |                             |    |      |          |                                    | * |
| DCMB5 | I-C | 49 | DCMB5_CP004079_I-C_spacer_49 | 35 | no hits  |                             |    |      |          |                                    | * |
| DCMB5 | I-C | 50 | DCMB5_CP004079_I-C_spacer_50 | 37 | no hits  |                             |    |      |          |                                    | * |
| DCMB5 | I-C | 51 | DCMB5_CP004079_I-C_spacer_51 | 32 | no hits  |                             |    |      |          |                                    | * |
|       |     |    |                              |    |          | KBTCE1/KBVC2-11<br>prophage |    |      |          | hypothetical<br>protein            |   |
| DCMB5 | I-C | 52 | DCMB5_CP004079_I-C_spacer_52 | 30 | prophage |                             | 12 | 100  | 8.58E-01 |                                    | * |
| DCMB5 | I-C | 53 | DCMB5_CP004079_I-C_spacer_53 | 35 | no hits  |                             |    |      |          |                                    | * |
|       |     |    |                              |    |          |                             |    |      |          | hypothetical<br>protein            |   |
| DCMB5 | I-C | 54 | DCMB5_CP004079_I-C_spacer_54 | 36 | prophage | CG3 prophage                | 13 | 100  | 3.59E-01 | phage tape<br>measure              | * |
| GT    | I-E | 1  | GT_CP001924_spacer_1         | 31 | prophage | 195 prophage                | 17 | 88.2 | 9.24E-01 |                                    | * |
| GT    | I-E | 2  | GT_CP001924_spacer_2         | 32 | no hits  |                             |    |      |          |                                    | * |
|       |     |    |                              |    |          |                             |    |      |          | hypothetical<br>protein            |   |
| GT    | I-E | 3  | GT_CP001924_spacer_3         | 32 | prophage | pg11a5 prophage             | 12 | 100  | 9.90E-01 | protease                           |   |
| GT    | I-E | 3  | GT_CP001924_spacer_3         | 32 | prophage | KB1/cDCE-4 prophage         | 12 | 100  | 9.90E-01 | hypothetical<br>protein            |   |
| GT    | I-E | 3  | GT_CP001924_spacer_3         | 32 | prophage | KB1/cDCE-7 prophage         | 12 | 100  | 9.90E-01 | hypothetical<br>protein            |   |
| GT    | I-E | 3  | GT_CP001924_spacer_3         | 32 | prophage | KB1/TCE-0 prophage          | 12 | 100  | 9.90E-01 | hypothetical<br>protein            |   |
| GT    | I-E | 3  | GT_CP001924_spacer_3         | 32 | prophage | KBDCA1/KBDCA2-6<br>prophage | 12 | 100  | 9.90E-01 | hypothetical<br>protein            |   |
| GT    | I-E | 3  | GT_CP001924_spacer_3         | 32 | prophage | KBTCE1/KBVC2-1<br>prophage  | 12 | 100  | 9.90E-01 | hypothetical<br>protein            |   |
| GT    | I-E | 3  | GT_CP001924_spacer_3         | 32 | prophage | KBTCE1/KBVC2-11<br>prophage | 21 | 85.7 | 2.84E-01 | hypothetical<br>protein            | * |
| GT    | I-E | 3  | GT_CP001924_spacer_3         | 32 | prophage | KBTCE1/KBVC2-5<br>prophage  | 12 | 100  | 9.90E-01 | hypothetical<br>protein            |   |
| GT    | I-E | 3  | GT_CP001924_spacer_3         | 32 | prophage | KBTCE2-2 prophage           | 12 | 100  | 9.90E-01 | hypothetical<br>protein            |   |
| GT    | I-E | 3  | GT_CP001924_spacer_3         | 32 | prophage | KBTCE3-3 prophage           | 12 | 100  | 9.90E-01 | protease                           |   |
| GT    | I-E | 4  | GT_CP001924_spacer_4         | 33 | no hits  |                             |    |      |          |                                    | * |
| GT    | I-E | 5  | GT_CP001924_spacer_5         | 32 | prophage | CG1 prophage                | 32 | 90.6 | 3.03E-07 | phage terminase<br>hypothetical    | * |
| GT    | I-E | 5  | GT_CP001924_spacer_5         | 32 | prophage | CG3 prophage                | 32 | 90.6 | 3.03E-07 | protein                            |   |
| GT    | I-E | 6  | GT_CP001924_spacer_6         | 32 | no hits  |                             |    |      |          |                                    | * |
|       |     |    |                              |    |          |                             |    |      |          | hypothetical<br>protein            |   |
| GT    | I-E | 7  | GT_CP001924_spacer_7         | 32 | prophage | KBTCE2-2 prophage           | 12 | 100  | 9.90E-01 | hypothetical<br>protein            | * |
| GT    | I-E | 7  | GT_CP001924_spacer_7         | 32 | prophage | KBTCE3-3 prophage           | 12 | 100  | 9.90E-01 | protein                            |   |
| GT    | I-E | 8  | GT_CP001924_spacer_8         | 32 | no hits  |                             |    |      |          |                                    | * |
| GT    | I-E | 9  | GT_CP001924_spacer_9         | 32 | prophage | KB1/cDCE-8 prophage         | 32 | 100  | 1.38E-11 | non-coding                         | * |

|    |     |    |                       |    |                  |                          |    |      |          |                      |   |
|----|-----|----|-----------------------|----|------------------|--------------------------|----|------|----------|----------------------|---|
| GT | I-E | 10 | GT_CP001924_spacer_10 | 32 | prophage         | CG3 prophage             | 12 | 100  | 9.90E-01 | hypothetical protein | * |
| GT | I-E | 11 | GT_CP001924_spacer_11 | 32 | prophage         | WBC-2 prophage           | 14 | 100  | 8.13E-02 | hypothetical protein | * |
| GT | I-E | 11 | GT_CP001924_spacer_11 | 32 | prophage         | KBDCA1-9 prophage        | 14 | 100  | 8.13E-02 | phage terminase      |   |
| GT | I-E | 11 | GT_CP001924_spacer_11 | 32 | prophage         | KBTCE1/KBVC2-10 prophage | 14 | 100  | 8.13E-02 | phage terminase      |   |
| GT | I-E | 11 | GT_CP001924_spacer_11 | 32 | prophage         | KBTCE1/KBVC2-11 prophage | 14 | 100  | 8.13E-02 | phage terminase      |   |
| GT | I-E | 12 | GT_CP001924_spacer_12 | 32 | IME- <i>vcrA</i> | IME- <i>vcrA</i> KBVC2   | 14 | 92.9 | 6.19E-01 | dsiB                 | * |
| GT | I-E | 13 | GT_CP001924_spacer_13 | 32 | prophage         | 195 prophage             | 12 | 100  | 9.90E-01 | phage integrase      | * |
| GT | I-E | 14 | GT_CP001924_spacer_14 | 32 | unknown GI       | CG1 GI                   | 24 | 87.5 | 2.46E-01 | hypothetical protein | * |
| GT | I-E | 15 | GT_CP001924_spacer_15 | 32 | prophage         | BTF08 prophage           | 32 | 84.4 | 1.57E-04 | hypothetical protein | * |
| GT | I-E | 15 | GT_CP001924_spacer_15 | 32 | prophage         | KBDCA1-9 prophage        | 16 | 93.8 | 2.84E-01 | non-coding           |   |
| GT | I-E | 15 | GT_CP001924_spacer_15 | 32 | prophage         | KBTCE1/KBVC2-10 prophage | 16 | 93.8 | 2.84E-01 | phage terminase      |   |
| GT | I-E | 15 | GT_CP001924_spacer_15 | 32 | prophage         | KBTCE1/KBVC2-11 prophage | 16 | 93.8 | 2.84E-01 | non-coding           |   |
| GT | I-E | 15 | GT_CP001924_spacer_15 | 32 | prophage         | KBTCE1/KBVC2-12 prophage | 32 | 84.4 | 1.57E-04 | non-coding           |   |
| GT | I-E | 16 | GT_CP001924_spacer_16 | 33 | prophage         | CG1 prophage             | 33 | 87.9 | 1.13E-06 | phage terminase      | * |
| GT | I-E | 16 | GT_CP001924_spacer_16 | 33 | prophage         | CG3 prophage             | 33 | 87.9 | 1.13E-06 | hypothetical protein |   |
| GT | I-E | 17 | GT_CP001924_spacer_17 | 33 | unknown GI       | BAV1 GI                  | 22 | 90.9 | 7.70E-02 | hypothetical protein | * |
| GT | I-E | 18 | GT_CP001924_spacer_18 | 32 | no hits          |                          |    |      |          |                      | * |
| GT | I-E | 19 | GT_CP001924_spacer_19 | 32 | prophage         | BTF08 prophage           | 18 | 94.4 | 2.33E-02 | DNA polymerase       |   |
| GT | I-E | 19 | GT_CP001924_spacer_19 | 32 | prophage         | CG1 prophage             | 32 | 93.8 | 7.12E-09 | phage terminase      | * |
| GT | I-E | 19 | GT_CP001924_spacer_19 | 32 | prophage         | CG3 prophage             | 32 | 93.8 | 7.12E-09 | hypothetical protein |   |
| GT | I-E | 20 | GT_CP001924_spacer_20 | 32 | IME1             | IME1-14                  | 32 | 94.4 | 8.59E-01 | hypothetical protein | * |
| GT | I-E | 21 | GT_CP001924_spacer_21 | 32 | no hits          |                          |    |      |          |                      | * |
| GT | I-E | 22 | GT_CP001924_spacer_22 | 32 | prophage         | BTF08 prophage           | 21 | 90.5 | 8.13E-02 | nuclease             |   |
| GT | I-E | 22 | GT_CP001924_spacer_22 | 32 | prophage         | KBDCA1-9 prophage        | 13 | 100  | 2.84E-01 | nuclease             |   |
| GT | I-E | 22 | GT_CP001924_spacer_22 | 32 | prophage         | KBTCE1/KBVC2-10 prophage | 13 | 100  | 2.84E-01 | hypothetical protein | * |
| GT | I-E | 23 | GT_CP001924_spacer_23 | 32 | prophage         | KBTCE1/KBVC2-11 prophage | 13 | 100  | 2.84E-01 | DNA primase          | * |
| GT | I-E | 24 | GT_CP001924_spacer_24 | 32 | prophage         | BTF08 prophage           | 28 | 85.7 | 5.84E-04 | DNA polymerase I     |   |

|        |     |    |                          |    |          |                          |    |      |          |                      |   |
|--------|-----|----|--------------------------|----|----------|--------------------------|----|------|----------|----------------------|---|
| GT     | I-E | 24 | GT_CP001924_spacer_24    | 32 | prophage | KBTCE1/KBVC2-12 prophage | 28 | 85.7 | 5.84E-04 | DNA polymerase I     |   |
| GT     | I-E | 24 | GT_CP001924_spacer_24    | 32 | prophage | KBTCE2-2 prophage        | 15 | 93.3 | 9.90E-01 | phage portal protein | * |
| GT     | I-E | 24 | GT_CP001924_spacer_24    | 32 | prophage | KBTCE3-3 prophage        | 15 | 93.3 | 9.90E-01 | phage portal protein |   |
| GT     | I-E | 25 | GT_CP001924_spacer_25    | 32 | no hits  |                          |    |      |          |                      | * |
| GT     | I-E | 26 | GT_CP001924_spacer_26    | 32 | prophage | KBTCE2-2 prophage        | 13 | 100  | 2.84E-01 | phage integrase      | * |
| GT     | I-E | 26 | GT_CP001924_spacer_26    | 32 | prophage | KBTCE3-3 prophage        | 13 | 100  | 2.84E-01 | phage integrase      |   |
| GT     | I-E | 27 | GT_CP001924_spacer_27    | 32 | IME1     | IME1-13                  | 32 | 100  | 5.07E-10 | hypothetical protein | * |
| GT     | I-E | 28 | GT_CP001924_spacer_28    | 32 | no hits  |                          |    |      |          |                      | * |
| GT     | I-E | 29 | GT_CP001924_spacer_29    | 33 | no hits  |                          |    |      |          |                      | * |
| GT     | I-E | 30 | GT_CP001924_spacer_30    | 32 | no hits  |                          |    |      |          |                      | * |
| GT     | I-E | 31 | GT_CP001924_spacer_31    | 32 | prophage | KBTCE1/KBVC2-12 prophage | 13 | 100  | 2.84E-01 | non-coding           | * |
| GT     | I-E | 32 | GT_CP001924_spacer_32    | 33 | no hits  |                          |    |      |          |                      | * |
| GT     | I-E | 33 | GT_CP001924_spacer_33    | 33 | IME1     | IME1-13                  | 33 | 100  | 1.59E-10 | hypothetical protein | * |
| GT     | I-E | 34 | GT_CP001924_spacer_34    | 32 | no hits  |                          |    |      |          |                      | * |
| GT     | I-E | 35 | GT_CP001924_spacer_35    | 31 | prophage | KBTCE1/KBVC2-10 prophage | 13 | 100  | 2.65E-01 | hypothetical protein |   |
| GT     | I-E | 35 | GT_CP001924_spacer_35    | 31 | prophage | KBTCE2-2 prophage        | 12 | 100  | 9.24E-01 | hypothetical protein |   |
| GT     | I-E | 35 | GT_CP001924_spacer_35    | 31 | prophage | KBTCE3-3 prophage        | 12 | 100  | 9.24E-01 | hypothetical protein |   |
| GT     | I-E | 35 | GT_CP001924_spacer_35    | 32 | prophage | KBDCA1-9 prophage        | 13 | 100  | 2.65E-01 | hypothetical protein | * |
| GT     | I-E | 36 | GT_CP001924_spacer_36    | 32 | no hits  |                          |    |      |          |                      | * |
| GT     | I-E | 37 | GT_CP001924_spacer_37    | 32 | prophage | CG3 prophage             | 12 | 100  | 9.90E-01 | hypothetical protein | * |
| KBDCA3 | I-C | 1  | KBDCA3_CP019946_spacer_1 | 34 | no hits  |                          |    |      |          |                      | * |
| KBDCA3 | I-C | 2  | KBDCA3_CP019946_spacer_2 | 34 | prophage | KBTCE2-2 prophage        | 12 | 100  | 8.01E-01 | phage protein        | * |
| KBDCA3 | I-C | 2  | KBDCA3_CP019946_spacer_2 | 34 | prophage | KBTCE3-3 prophage        | 12 | 100  | 8.01E-01 | phage protein        |   |
| KBDCA3 | I-C | 3  | KBDCA3_CP019946_spacer_3 | 34 | prophage | KBDCA1/KBDCA2-6 prophage | 12 | 100  | 8.01E-01 | phage tape measure   |   |
| KBDCA3 | I-C | 3  | KBDCA3_CP019946_spacer_3 | 34 | prophage | KBTCE1/KBVC2-1 prophage  | 12 | 100  | 8.01E-01 | phage tape measure   | * |
| KBDCA3 | I-C | 3  | KBDCA3_CP019946_spacer_3 | 34 | prophage | KBTCE1/KBVC2-1 prophage  | 12 | 100  | 8.01E-01 | phage tape measure   |   |
| KBDCA3 | I-C | 3  | KBDCA3_CP019946_spacer_3 | 34 | prophage | KBTCE1/KBVC2-5 prophage  | 12 | 100  | 8.01E-01 | hypothetical protein |   |
| KBDCA3 | I-C | 4  | KBDCA3_CP019946_spacer_4 | 31 | no hits  |                          |    |      |          |                      | * |
| KBDCA3 | I-C | 5  | KBDCA3_CP019946_spacer_5 | 33 | prophage | pg11a5 prophage          | 12 | 100  | 7.56E-01 | hypothetical protein | * |

|        |     |    |                           |    |                  |                                 |    |      |          |                                   |   |
|--------|-----|----|---------------------------|----|------------------|---------------------------------|----|------|----------|-----------------------------------|---|
| KBDCA3 | I-C | 5  | KBDCA3_CP019946_spacer_5  | 33 | prophage         | 195 prophage                    | 12 | 100  | 7.56E-01 | phage protein                     |   |
| KBDCA3 | I-C | 5  | KBDCA3_CP019946_spacer_5  | 33 | prophage         | KBTC1/KBVC2-1 prophage          | 12 | 100  | 7.56E-01 | hypothetical protein              |   |
| KBDCA3 | I-C | 6  | KBDCA3_CP019946_spacer_6  | 35 | unknown GI       | BTF08 GI                        | 25 | 92   | 1.96E-03 | transcriptional repressor LexA    |   |
| KBDCA3 | I-C | 6  | KBDCA3_CP019946_spacer_6  | 35 | prophage         | CG1 prophage                    | 24 | 91.7 | 6.84E-03 | transcriptional regulator         | * |
| KBDCA3 | I-C | 6  | KBDCA3_CP019946_spacer_6  | 35 | prophage         | CG1 prophage                    | 12 | 100  | 8.45E-01 | hypothetical protein              |   |
| KBDCA3 | I-C | 6  | KBDCA3_CP019946_spacer_6  | 35 | unknown GI       | 11a5-GI                         | 25 | 92   | 1.96E-03 | phage tape                        |   |
| KBDCA3 | I-C | 7  | KBDCA3_CP019946_spacer_7  | 35 | prophage         | 195 prophage                    | 15 | 93.3 | 8.45E-01 | measure reductive dehalogenase OG | * |
| KBDCA3 | I-C | 8  | KBDCA3_CP019946_spacer_8  | 34 | IME-OG49         | DCMB5 GI <i>rdhA</i> containing | 29 | 90.9 | 8.34E-02 | 49                                | * |
| KBDCA3 | I-C | 9  | KBDCA3_CP019946_spacer_9  | 34 | IME- <i>vcrA</i> | IME- <i>vcrA</i> KBVC2          | 12 | 100  | 1.87E-01 | parBc                             | * |
| KBDCA3 | I-C | 10 | KBDCA3_CP019946_spacer_10 | 35 | no hits          |                                 |    |      |          |                                   | * |
| KBDCA3 | I-C | 11 | KBDCA3_CP019946_spacer_11 | 34 | prophage         | pg11a5 prophage                 | 26 | 84.6 | 6.57E-02 | phage terminase                   | * |
| KBDCA3 | I-C | 12 | KBDCA3_CP019946_spacer_12 | 34 | no hits          |                                 |    |      |          |                                   | * |
| KBDCA3 | I-C | 13 | KBDCA3_CP019946_spacer_13 | 35 | IME1             | IME1-11                         | 18 | 94.4 | 8.73E-01 | DsiB                              | * |
| KBDCA3 | I-C | 13 | KBDCA3_CP019946_spacer_13 | 35 | IME1             | IME1-8                          | 18 | 94.4 | 8.73E-01 | DsiB                              |   |
| KBDCA3 | I-C | 14 | KBDCA3_CP019946_spacer_14 | 36 | prophage         | 195 prophage                    | 12 | 100  | 8.90E-01 | hypothetical protein              |   |
| KBDCA3 | I-C | 14 | KBDCA3_CP019946_spacer_14 | 36 | IME1             | IME1-13                         | 35 | 94.3 | 7.87E-09 | hypothetical protein              | * |
| KBDCA3 | I-C | 14 | KBDCA3_CP019946_spacer_14 | 36 | prophage         | KB1/cDCE-4 prophage             | 22 | 86.4 | 2.55E-01 | non-coding hypothetical           |   |
| KBDCA3 | I-C | 14 | KBDCA3_CP019946_spacer_14 | 36 | prophage         | KBDCA1/KBDCA2-6 prophage        | 22 | 86.4 | 2.55E-01 | hypothetical protein              |   |
| KBDCA3 | I-C | 14 | KBDCA3_CP019946_spacer_14 | 36 | prophage         | KBTC1/KBVC2-1 prophage          | 17 | 88.2 | 8.90E-01 | hypothetical protein              |   |
| KBDCA3 | I-C | 14 | KBDCA3_CP019946_spacer_14 | 36 | prophage         | KBTC1/KBVC2-1 prophage          | 22 | 86.4 | 2.55E-01 | hypothetical protein              |   |
| KBDCA3 | I-C | 14 | KBDCA3_CP019946_spacer_14 | 36 | prophage         | KBTC1/KBVC2-1 prophage          | 22 | 86.4 | 2.55E-01 | hypothetical protein              |   |
| KBDCA3 | I-C | 14 | KBDCA3_CP019946_spacer_14 | 36 | prophage         | KBTC1/KBVC2-10 prophage         | 15 | 93.3 | 8.90E-01 | hypothetical protein              |   |
| KBDCA3 | I-C | 14 | KBDCA3_CP019946_spacer_14 | 36 | prophage         | KBTC1/KBVC2-11 prophage         | 15 | 93.3 | 8.90E-01 | phage tape                        |   |
| KBDCA3 | I-C | 14 | KBDCA3_CP019946_spacer_14 | 36 | prophage         | KBTC1/KBVC2-11 prophage         | 15 | 93.3 | 8.90E-01 | measure phage tape                |   |
| KBDCA3 | I-C | 14 | KBDCA3_CP019946_spacer_14 | 36 | prophage         | KBTC1/KBVC2-5 prophage          | 22 | 86.4 | 2.55E-01 | measure phage tape                |   |
| KBDCA3 | I-C | 14 | KBDCA3_CP019946_spacer_14 | 36 | IME- <i>tceA</i> | IME- <i>tceA</i>                | 36 | 91.7 | 9.59E-08 | phage portal protein              |   |
| KBDCA3 | I-C | 15 | KBDCA3_CP019946_spacer_15 | 34 | no hits          |                                 |    |      |          |                                   | * |

|         |     |    |                            |    |            |                            |    |      |          |                           |   |
|---------|-----|----|----------------------------|----|------------|----------------------------|----|------|----------|---------------------------|---|
| KBDC A3 | I-C | 16 | KBDC A3_CP019946_spacer_16 | 34 | prophage   | KBTC E2-2 prophage         | 12 | 100  | 8.01E-01 | site-specific recombinase | * |
| KBDC A3 | I-C | 16 | KBDC A3_CP019946_spacer_16 | 34 | prophage   | KBTC E3-3 prophage         | 12 | 100  | 8.01E-01 | site-specific recombinase |   |
| KBDC A3 | I-C | 17 | KBDC A3_CP019946_spacer_17 | 35 | no hits    |                            |    |      |          |                           | * |
| KBDC A3 | I-C | 18 | KBDC A3_CP019946_spacer_18 | 34 | prophage   | CG1 prophage               | 12 | 100  | 8.01E-01 | major capsid protein      | * |
| KBDC A3 | I-C | 19 | KBDC A3_CP019946_spacer_19 | 34 | no hits    |                            |    |      |          |                           | * |
| KBDC A3 | I-C | 20 | KBDC A3_CP019946_spacer_20 | 33 | prophage   | KB1/cDCE-4 prophage        | 33 | 87.9 | 8.08E-07 | hypothetical protein      |   |
| KBDC A3 | I-C | 20 | KBDC A3_CP019946_spacer_20 | 33 | prophage   | KBDC A1/KBDC A2-6 prophage | 33 | 87.9 | 8.08E-07 | hypothetical protein      |   |
| KBDC A3 | I-C | 20 | KBDC A3_CP019946_spacer_20 | 33 | prophage   | KBTC E1/KBVC2-1 prophage   | 33 | 87.9 | 8.08E-07 | hypothetical protein      | * |
| KBDC A3 | I-C | 20 | KBDC A3_CP019946_spacer_20 | 33 | prophage   | KBTC E1/KBVC2-1 prophage   | 33 | 87.9 | 8.08E-07 | hypothetical protein      |   |
| KBDC A3 | I-C | 21 | KBDC A3_CP019946_spacer_21 | 34 | IME1       | IME1-9                     | 34 | 100  | 4.92E-11 | hypothetical protein      | * |
| KBDC A3 | I-C | 21 | KBDC A3_CP019946_spacer_21 | 34 | prophage   | KBDC A1/KBDC A2-6 prophage | 12 | 100  | 8.01E-01 | phage prohead protease    |   |
| KBDC A3 | I-C | 21 | KBDC A3_CP019946_spacer_21 | 34 | prophage   | KBTC E1/KBVC2-1 prophage   | 12 | 100  | 8.01E-01 | phage prohead protease    |   |
| KBDC A3 | I-C | 21 | KBDC A3_CP019946_spacer_21 | 34 | prophage   | KBTC E1/KBVC2-1 prophage   | 12 | 100  | 8.01E-01 | phage prohead protease    |   |
| KBDC A3 | I-C | 21 | KBDC A3_CP019946_spacer_21 | 34 | prophage   | KBTC E1/KBVC2-5 prophage   | 12 | 100  | 8.01E-01 | phage prohead protease    |   |
| KBDC A3 | I-C | 22 | KBDC A3_CP019946_spacer_22 | 35 | unknown GI | 195 GI                     | 35 | 85.7 | 1.60E-04 | DNA primase               |   |
| KBDC A3 | I-C | 22 | KBDC A3_CP019946_spacer_22 | 35 | IME1       | IME1-14                    | 35 | 85.7 | 1.60E-04 | dsiB                      |   |
| KBDC A3 | I-C | 22 | KBDC A3_CP019946_spacer_22 | 35 | IME1       | IME1-10                    | 35 | 100  | 1.41E-11 | hypothetical protein      | * |
| KBDC A3 | I-C | 22 | KBDC A3_CP019946_spacer_22 | 35 | IME1       | IME1-11                    | 35 | 85.7 | 1.60E-04 | phage tape measure        |   |
| KBDC A3 | I-C | 22 | KBDC A3_CP019946_spacer_22 | 35 | IME1       | IME1-8                     | 35 | 100  | 1.41E-11 | hypothetical protein      |   |
| KBDC A3 | I-C | 22 | KBDC A3_CP019946_spacer_22 | 35 | IME1       | IME1-8                     | 35 | 85.7 | 1.60E-04 | phage tape measure        |   |
| KBDC A3 | I-C | 22 | KBDC A3_CP019946_spacer_22 | 35 | IME1       | IME1-9                     | 35 | 85.7 | 1.60E-04 | phage tape measure        |   |
| KBDC A3 | I-C | 22 | KBDC A3_CP019946_spacer_22 | 35 | IME1       | IME1-13                    | 35 | 100  | 1.41E-11 | hypothetical protein      |   |
| KBDC A3 | I-C | 22 | KBDC A3_CP019946_spacer_22 | 35 | IME1       | IME1-13                    | 35 | 85.7 | 1.60E-04 | hypothetical protein      |   |
| KBDC A3 | I-C | 22 | KBDC A3_CP019946_spacer_22 | 35 | prophage   | KBDC A1/KBDC A2-6 prophage | 12 | 100  | 8.45E-01 | hypothetical protein      |   |

|        |     |    |                           |    |                  |                          |    |      |          |                                 |   |
|--------|-----|----|---------------------------|----|------------------|--------------------------|----|------|----------|---------------------------------|---|
| KBDCA3 | I-C | 22 | KBDCA3_CP019946_spacer_22 | 35 | prophage         | KBTCE1/KBVC2-1 prophage  | 12 | 100  | 8.45E-01 | hypothetical protein            |   |
| KBDCA3 | I-C | 22 | KBDCA3_CP019946_spacer_22 | 35 | prophage         | KBTCE1/KBVC2-1 prophage  | 12 | 100  | 8.45E-01 | hypothetical protein            |   |
| KBDCA3 | I-C | 22 | KBDCA3_CP019946_spacer_22 | 35 | prophage         | KBTCE1/KBVC2-5 prophage  | 12 | 100  | 8.45E-01 | hypothetical protein            |   |
| KBDCA3 | I-C | 22 | KBDCA3_CP019946_spacer_22 | 35 | IME- <i>vcrA</i> | IME- <i>vcrA</i> GT      | 14 | 92.9 | 6.88E-01 | hypothetical protein            |   |
| KBDCA3 | I-C | 22 | KBDCA3_CP019946_spacer_22 | 35 | IME- <i>vcrA</i> | IME- <i>vcrA</i> KBVC1   | 14 | 92.9 | 6.88E-01 | dsiB                            |   |
| KBDCA3 | I-C | 22 | KBDCA3_CP019946_spacer_22 | 35 | IME- <i>vcrA</i> | IME- <i>vcrA</i> WBC-2   | 14 | 92.9 | 6.88E-01 | dsiB                            |   |
| KBDCA3 | I-C | 23 | KBDCA3_CP019946_spacer_23 | 36 | prophage         | KBTCE2-2 prophage        | 16 | 100  | 6.00E-03 | hypothetical protein            | * |
| KBDCA3 | I-C | 23 | KBDCA3_CP019946_spacer_23 | 36 | prophage         | KBTCE3-3 prophage        | 16 | 100  | 6.00E-03 | hypothetical protein            |   |
| KBDCA3 | I-C | 24 | KBDCA3_CP019946_spacer_24 | 36 | prophage         | BTF08 prophage           | 12 | 100  | 7.65E-01 | phage tape measure              |   |
| KBDCA3 | I-C | 24 | KBDCA3_CP019946_spacer_24 | 36 | prophage         | KBTCE1/KBVC2-12 prophage | 12 | 100  | 8.90E-01 | non-coding hypothetical protein |   |
| KBDCA3 | I-C | 24 | KBDCA3_CP019946_spacer_24 | 36 | prophage         | KBTCE2-2 prophage        | 14 | 100  | 7.30E-02 | hypothetical protein            | * |
| KBDCA3 | I-C | 24 | KBDCA3_CP019946_spacer_24 | 36 | prophage         | KBTCE2-2 prophage        | 15 | 93.3 | 8.90E-01 | non-coding hypothetical protein |   |
| KBDCA3 | I-C | 24 | KBDCA3_CP019946_spacer_24 | 36 | prophage         | KBTCE3-3 prophage        | 14 | 100  | 7.30E-02 | hypothetical protein            |   |
| KBDCA3 | I-C | 24 | KBDCA3_CP019946_spacer_24 | 36 | prophage         | KBTCE3-3 prophage        | 15 | 93.3 | 8.90E-01 | hypothetical protein            |   |
| KBDCA3 | I-C | 25 | KBDCA3_CP019946_spacer_25 | 36 | no hits          |                          |    |      |          |                                 | * |
| KBDCA3 | I-C | 26 | KBDCA3_CP019946_spacer_26 | 34 | prophage         | 195 prophage             | 12 | 100  | 8.01E-01 | hypothetical protein            |   |
| KBDCA3 | I-C | 26 | KBDCA3_CP019946_spacer_26 | 34 | IME1             | IME1-9                   | 20 | 90   | 9.35E-01 | phage DNA helicase              | * |
| KBDCA3 | I-C | 27 | KBDCA3_CP019946_spacer_27 | 32 | IME1             | IME1-13                  | 32 | 100  | 5.07E-10 | hypothetical protein            | * |
| KBDCA3 | I-C | 28 | KBDCA3_CP019946_spacer_28 | 32 | prophage         | pg11a5 prophage          | 12 | 100  | 7.12E-01 | hypothetical protein            | * |
| KBDCA3 | I-C | 28 | KBDCA3_CP019946_spacer_28 | 32 | prophage         | KB1/cDCE-4 prophage      | 12 | 100  | 7.12E-01 | hypothetical protein            |   |
| KBDCA3 | I-C | 28 | KBDCA3_CP019946_spacer_28 | 32 | prophage         | KBDCA1/KBDCA2-6 prophage | 12 | 100  | 7.12E-01 | hypothetical protein            |   |
| KBDCA3 | I-C | 28 | KBDCA3_CP019946_spacer_28 | 32 | prophage         | KBTCE1/KBVC2-1 prophage  | 12 | 100  | 7.12E-01 | hypothetical protein            |   |
| KBDCA3 | I-C | 28 | KBDCA3_CP019946_spacer_28 | 32 | prophage         | KBTCE1/KBVC2-1 prophage  | 12 | 100  | 7.12E-01 | hypothetical protein            |   |
| KBDCA3 | I-C | 28 | KBDCA3_CP019946_spacer_28 | 32 | prophage         | KBTCE1/KBVC2-5 prophage  | 12 | 100  | 7.12E-01 | hypothetical protein            |   |
| KBDCA3 | I-C | 28 | KBDCA3_CP019946_spacer_28 | 32 | prophage         | KBTCE1/KBVC2-5 prophage  | 12 | 100  | 7.12E-01 | hypothetical protein            |   |
| KBDCA3 | I-C | 28 | KBDCA3_CP019946_spacer_28 | 32 | prophage         | KBTCE2-2 prophage        | 12 | 100  | 7.12E-01 | phage terminase                 |   |



|         |     |    |                            |    |          |                            |    |      |          |                       |   |
|---------|-----|----|----------------------------|----|----------|----------------------------|----|------|----------|-----------------------|---|
| KBDC A3 | I-C | 28 | KBDC A3_CP019946_spacer_28 | 32 | prophage | KBTCE3-3 prophage          | 12 | 100  | 7.12E-01 | phage terminase       |   |
| KBDC A3 | I-C | 29 | KBDC A3_CP019946_spacer_29 | 34 | prophage | KB1/cDCE-4 prophage        | 12 | 100  | 8.01E-01 | hypothetical protein  |   |
| KBDC A3 | I-C | 29 | KBDC A3_CP019946_spacer_29 | 34 | prophage | KBDC A1/KBDC A2-6 prophage | 12 | 100  | 8.01E-01 | phage related protein |   |
| KBDC A3 | I-C | 29 | KBDC A3_CP019946_spacer_29 | 34 | prophage | KBTCE1/KBVC2-1 prophage    | 12 | 100  | 8.01E-01 | hypothetical protein  | * |
| KBDC A3 | I-C | 29 | KBDC A3_CP019946_spacer_29 | 34 | prophage | KBTCE1/KBVC2-1 prophage    | 12 | 100  | 8.01E-01 | hypothetical protein  |   |
| KBDC A3 | I-C | 30 | KBDC A3_CP019946_spacer_30 | 35 | prophage | KB1/cDCE-4 prophage        | 12 | 100  | 8.45E-01 | hypothetical protein  |   |
| KBDC A3 | I-C | 30 | KBDC A3_CP019946_spacer_30 | 35 | prophage | KBDC A1/KBDC A2-6 prophage | 12 | 100  | 8.45E-01 | phage related protein |   |
| KBDC A3 | I-C | 30 | KBDC A3_CP019946_spacer_30 | 35 | prophage | KBTCE1/KBVC2-1 prophage    | 12 | 100  | 8.45E-01 | hypothetical protein  | * |
| KBDC A3 | I-C | 30 | KBDC A3_CP019946_spacer_30 | 35 | prophage | KBTCE1/KBVC2-1 prophage    | 12 | 100  | 8.45E-01 | hypothetical protein  |   |
| KBDC A3 | I-C | 31 | KBDC A3_CP019946_spacer_31 | 36 | IME1     | IME1-10                    | 36 | 100  | 3.72E-12 | hypothetical protein  | * |
| KBDC A3 | I-C | 31 | KBDC A3_CP019946_spacer_31 | 36 | IME1     | IME1-8                     | 36 | 100  | 3.72E-12 | hypothetical protein  |   |
| KBDC A3 | I-C | 32 | KBDC A3_CP019946_spacer_32 | 35 | IME1     | IME1-10                    | 26 | 88.5 | 2.05E-02 | hypothetical protein  | * |
| KBDC A3 | I-C | 32 | KBDC A3_CP019946_spacer_32 | 35 | IME1     | IME1-11                    | 26 | 88.5 | 2.05E-02 | hypothetical protein  |   |
| KBDC A3 | I-C | 32 | KBDC A3_CP019946_spacer_32 | 35 | IME1     | IME1-9                     | 26 | 88.5 | 2.05E-02 | hypothetical protein  |   |
| KBDC A3 | I-C | 33 | KBDC A3_CP019946_spacer_33 | 35 | IME1     | IME1-8                     | 33 | 97   | 6.28E-09 | phage protein         | * |
| KBDC A3 | I-C | 33 | KBDC A3_CP019946_spacer_33 | 35 | prophage | KBDC A1/KBDC A2-6 prophage | 12 | 100  | 8.45E-01 | phage protein         |   |
| KBDC A3 | I-C | 33 | KBDC A3_CP019946_spacer_33 | 35 | prophage | KBTCE1/KBVC2-1 prophage    | 12 | 100  | 8.45E-01 | non-coding            |   |
| KBDC A3 | I-C | 33 | KBDC A3_CP019946_spacer_33 | 35 | prophage | KBTCE1/KBVC2-1 prophage    | 12 | 100  | 8.45E-01 | phage portal protein  |   |
| KBDC A3 | I-C | 33 | KBDC A3_CP019946_spacer_33 | 35 | prophage | KBTCE1/KBVC2-5 prophage    | 12 | 100  | 8.45E-01 | phage portal protein  |   |
| KBDC A3 | I-C | 33 | KBDC A3_CP019946_spacer_33 | 35 | prophage | KBTCE2-2 prophage          | 27 | 81.5 | 8.45E-01 | phage portal protein  |   |
| KBDC A3 | I-C | 33 | KBDC A3_CP019946_spacer_33 | 35 | prophage | KBTCE3-3 prophage          | 27 | 81.5 | 8.45E-01 | phage portal protein  |   |
| KBDC A3 | I-C | 34 | KBDC A3_CP019946_spacer_34 | 34 | prophage | KBTCE2-2 prophage          | 16 | 93.8 | 1.97E-01 | phage tape measure    | * |
| KBDC A3 | I-C | 34 | KBDC A3_CP019946_spacer_34 | 34 | prophage | KBTCE3-3 prophage          | 16 | 93.8 | 1.97E-01 | phage tape measure    |   |
| KBDC A3 | I-C | 35 | KBDC A3_CP019946_spacer_35 | 35 | no hits  |                            |    |      |          |                       | * |



|       |     |    |                          |    |                  |                          |    |      |          |                      |   |
|-------|-----|----|--------------------------|----|------------------|--------------------------|----|------|----------|----------------------|---|
| KBVC1 | I-E | 9  | KBVC1_CP019968_spacer_9  | 32 | IME1             | IME1-13                  | 32 | 100  | 5.07E-10 | hypothetical protein |   |
| KBVC1 | I-E | 9  | KBVC1_CP019968_spacer_9  | 32 | prophage         | KBTCE2-2 prophage        | 12 | 100  | 7.12E-01 | hypothetical protein |   |
| KBVC1 | I-E | 9  | KBVC1_CP019968_spacer_9  | 32 | prophage         | KBTCE3-3 prophage        | 12 | 100  | 7.12E-01 | hypothetical protein |   |
| KBVC1 | I-E | 10 | KBVC1_CP019968_spacer_10 | 32 | IME1             | IME1-11                  | 32 | 96.6 | 1.72E-08 | hypothetical protein |   |
| KBVC1 | I-E | 10 | KBVC1_CP019968_spacer_10 | 32 | IME1             | IME1-8                   | 32 | 100  | 4.05E-10 | hypothetical protein | * |
| KBVC1 | I-E | 11 | KBVC1_CP019968_spacer_11 | 32 | prophage         | CG1 prophage             | 31 | 96.8 | 7.53E-08 | hypothetical protein |   |
| KBVC1 | I-E | 11 | KBVC1_CP019968_spacer_11 | 32 | prophage         | KB1/cDCE-8 prophage      | 32 | 100  | 9.89E-12 | hypothetical protein | * |
| KBVC1 | I-E | 12 | KBVC1_CP019968_spacer_12 | 32 | no hits          |                          |    |      |          |                      | * |
| KBVC1 | I-E | 13 | KBVC1_CP019968_spacer_13 | 32 | no hits          |                          |    |      |          |                      | * |
| KBVC1 | I-E | 14 | KBVC1_CP019968_spacer_14 | 32 | no hits          |                          |    |      |          |                      | * |
| KBVC1 | I-E | 15 | KBVC1_CP019968_spacer_15 | 32 | prophage         | 195 prophage             | 12 | 100  | 7.12E-01 | hypothetical protein |   |
| KBVC1 | I-E | 15 | KBVC1_CP019968_spacer_15 | 32 | IME1             | IME1-10                  | 32 | 96.9 | 2.16E-08 | hypothetical protein | * |
| KBVC1 | I-E | 15 | KBVC1_CP019968_spacer_15 | 32 | IME1             | IME1-10                  | 32 | 93.8 | 2.63E-07 | hypothetical protein |   |
| KBVC1 | I-E | 15 | KBVC1_CP019968_spacer_15 | 32 | IME1             | IME1-8                   | 32 | 93.8 | 2.63E-07 | hypothetical protein |   |
| KBVC1 | I-E | 15 | KBVC1_CP019968_spacer_15 | 32 | IME1             | IME1-8                   | 32 | 93.8 | 2.63E-07 | hypothetical protein |   |
| KBVC1 | I-E | 15 | KBVC1_CP019968_spacer_15 | 32 | IME1             | IME1-8                   | 32 | 93.8 | 2.63E-07 | hypothetical protein |   |
| KBVC1 | I-E | 15 | KBVC1_CP019968_spacer_15 | 32 | IME1             | IME1-13                  | 32 | 90.6 | 1.12E-05 | phage integrase      |   |
| KBVC1 | I-E | 15 | KBVC1_CP019968_spacer_15 | 32 | IME- <i>tceA</i> | IME- <i>tceA</i>         | 32 | 93.8 | 2.63E-07 | hypothetical protein |   |
| KBVC1 | I-E | 16 | KBVC1_CP019968_spacer_16 | 32 | IME1             | IME1-10                  | 32 | 96.6 | 1.72E-08 | non-coding           |   |
| KBVC1 | I-E | 16 | KBVC1_CP019968_spacer_16 | 32 | IME1             | IME1-8                   | 32 | 96.6 | 1.72E-08 | non-coding           |   |
| KBVC1 | I-E | 16 | KBVC1_CP019968_spacer_16 | 32 | IME1             | IME1-8                   | 32 | 93.8 | 2.10E-07 | non-coding           | * |
| KBVC1 | I-E | 17 | KBVC1_CP019968_spacer_17 | 32 | prophage         | BTF08-2 prophage         | 32 | 84.4 | 1.13E-04 | hypothetical protein | * |
| KBVC1 | I-E | 17 | KBVC1_CP019968_spacer_17 | 32 | prophage         | KBTCE1/KBVC2-10 prophage | 16 | 93.8 | 2.04E-01 | hypothetical protein |   |
| KBVC1 | I-E | 17 | KBVC1_CP019968_spacer_17 | 32 | prophage         | KBTCE1/KBVC2-11 prophage | 16 | 93.8 | 2.04E-01 | hypothetical protein |   |
| KBVC1 | I-E | 17 | KBVC1_CP019968_spacer_17 | 32 | prophage         | KBTCE1/KBVC2-12 prophage | 32 | 84.4 | 1.13E-04 | hypothetical protein |   |
| KBVC1 | I-E | 17 | KBVC1_CP019968_spacer_17 | 32 | prophage         | KBTCE1/KBVC2-12 prophage | 32 | 84.4 | 1.13E-04 | phage terminase      |   |

|       |     |    |                          |    |                  |                          |    |      |          |                      |   |
|-------|-----|----|--------------------------|----|------------------|--------------------------|----|------|----------|----------------------|---|
| KBVC1 | I-E | 18 | KBVC1_CP019968_spacer_18 | 33 | prophage         | CG1 prophage             | 33 | 87.9 | 8.08E-07 | major capsid protein | * |
| KBVC1 | I-E | 18 | KBVC1_CP019968_spacer_18 | 33 | prophage         | KBDCA1/KBDCA2-6 prophage | 15 | 93.3 | 7.56E-01 | major capsid protein |   |
| KBVC1 | I-E | 18 | KBVC1_CP019968_spacer_18 | 33 | prophage         | KBTC1/KBVC2-1 prophage   | 15 | 93.3 | 7.56E-01 | phage terminase      |   |
| KBVC1 | I-E | 18 | KBVC1_CP019968_spacer_18 | 33 | prophage         | KBTC1/KBVC2-1 prophage   | 15 | 93.3 | 7.56E-01 | major capsid protein |   |
| KBVC1 | I-E | 18 | KBVC1_CP019968_spacer_18 | 33 | prophage         | KBTC1/KBVC2-5 prophage   | 15 | 93.3 | 7.56E-01 | major capsid protein |   |
| KBVC1 | I-E | 19 | KBVC1_CP019968_spacer_19 | 33 | unknown GI       | BAV1 GI                  | 22 | 90.9 | 7.70E-02 | hypothetical protein | * |
| KBVC1 | I-E | 20 | KBVC1_CP019968_spacer_20 | 32 | prophage         | KBTC2-2 prophage         | 12 | 100  | 7.12E-01 | phage portal protein | * |
| KBVC1 | I-E | 20 | KBVC1_CP019968_spacer_20 | 32 | prophage         | KBTC3-3 prophage         | 12 | 100  | 7.12E-01 | phage portal protein |   |
| KBVC1 | I-E | 21 | KBVC1_CP019968_spacer_21 | 32 | no hits          |                          |    |      |          |                      | * |
| KBVC1 | I-E | 22 | KBVC1_CP019968_spacer_22 | 32 | prophage         | CG1 prophage             | 32 | 93.8 | 5.12E-09 | phage terminase      | * |
| KBVC1 | I-E | 22 | KBVC1_CP019968_spacer_22 | 32 | prophage         | CG1 prophage             | 32 | 93.8 | 2.63E-07 | terminase            |   |
| KBVC1 | I-E | 22 | KBVC1_CP019968_spacer_22 | 32 | IME- <i>vcrA</i> | IME- <i>vcrA</i> GT      | 13 | 100  | 5.08E-02 | dsiB                 |   |
| KBVC1 | I-E | 22 | KBVC1_CP019968_spacer_22 | 32 | IME- <i>vcrA</i> | IME- <i>vcrA</i> KBVC1   | 13 | 100  | 5.08E-02 | dsiB                 |   |
| KBVC1 | I-E | 23 | KBVC1_CP019968_spacer_23 | 32 | no hits          |                          |    |      |          |                      | * |
| KBVC1 | I-E | 24 | KBVC1_CP019968_spacer_24 | 32 | no hits          |                          |    |      |          |                      | * |
| KBVC1 | I-E | 25 | KBVC1_CP019968_spacer_25 | 32 | no hits          |                          |    |      |          |                      | * |
| KBVC1 | I-E | 26 | KBVC1_CP019968_spacer_26 | 32 | no hits          |                          |    |      |          |                      | * |
| KBVC1 | I-E | 27 | KBVC1_CP019968_spacer_27 | 32 | prophage         | BTF08-2 prophage         | 28 | 85.7 | 3.94E-04 | hypothetical protein | * |
| KBVC1 | I-E | 27 | KBVC1_CP019968_spacer_27 | 32 | prophage         | KBTC1/KBVC2-12 prophage  | 28 | 85.7 | 3.94E-04 | DNA polymerase I     |   |
| KBVC1 | I-E | 27 | KBVC1_CP019968_spacer_27 | 32 | prophage         | KBTC1/KBVC2-12 prophage  | 28 | 85.7 | 3.94E-04 | DNA polymerase I     |   |
| KBVC1 | I-E | 27 | KBVC1_CP019968_spacer_27 | 32 | prophage         | KBTC2-2 prophage         | 15 | 93.3 | 7.12E-01 | hypothetical protein |   |
| KBVC1 | I-E | 27 | KBVC1_CP019968_spacer_27 | 32 | prophage         | KBTC3-3 prophage         | 15 | 93.3 | 7.12E-01 | phage portal protein |   |
| KBVC1 | I-E | 28 | KBVC1_CP019968_spacer_28 | 32 | no hits          |                          |    |      |          |                      | * |
| KBVC1 | I-E | 29 | KBVC1_CP019968_spacer_30 | 32 | prophage         | KBTC2-2 prophage         | 13 | 100  | 2.04E-01 | phage integrase      |   |
| KBVC1 | I-E | 29 | KBVC1_CP019968_spacer_29 | 32 | no hits          |                          |    |      |          |                      | * |
| KBVC1 | I-E | 30 | KBVC1_CP019968_spacer_30 | 32 | IME1             | IME1-13                  | 32 | 100  | 5.07E-10 | hypothetical protein | * |
| KBVC1 | I-E | 30 | KBVC1_CP019968_spacer_30 | 32 | prophage         | KBTC3-3 prophage         | 13 | 100  | 2.04E-01 | phage integrase      |   |
| KBVC1 | I-E | 31 | KBVC1_CP019968_spacer_31 | 32 | no hits          |                          |    |      |          |                      | * |
| KBVC1 | I-E | 32 | KBVC1_CP019968_spacer_32 | 33 | no hits          |                          |    |      |          |                      | * |
| KBVC1 | I-E | 33 | KBVC1_CP019968_spacer_33 | 32 | IME- <i>vcrA</i> | IME- <i>vcrA</i> GT      | 19 | 89.5 | 1.46E-02 | dsiB                 | * |
| KBVC1 | I-E | 33 | KBVC1_CP019968_spacer_33 | 32 | IME- <i>vcrA</i> | IME- <i>vcrA</i> KBVC1   | 19 | 89.5 | 1.46E-02 | dsiB                 |   |

|       |     |    |                          |    |                  |                        |    |      |          |                      |   |
|-------|-----|----|--------------------------|----|------------------|------------------------|----|------|----------|----------------------|---|
| KBVC1 | I-E | 33 | KBVC1_CP019968_spacer_33 | 32 | IME- <i>verA</i> | IME- <i>verA</i> WBC-2 | 19 | 89.5 | 1.46E-02 | dsiB                 |   |
| KBVC1 | I-E | 34 | KBVC1_CP019968_spacer_34 | 32 | no hits          |                        |    |      |          |                      | * |
| KBVC1 | I-E | 35 | KBVC1_CP019968_spacer_35 | 33 | no hits          |                        |    |      |          |                      | * |
| KBVC1 | I-E | 36 | KBVC1_CP019968_spacer_36 | 33 | IME1             | IME1-13                | 33 | 100  | 1.59E-10 | hypothetical protein | * |
| KBVC1 | I-E | 37 | KBVC1_CP019968_spacer_37 | 32 | no hits          |                        |    |      |          |                      | * |
| KBVC1 | I-E | 38 | KBVC1_CP019968_spacer_38 | 31 | prophage         | KBTCE2-2 prophage      | 12 | 100  | 6.67E-01 | hypothetical protein | * |
| KBVC1 | I-E | 38 | KBVC1_CP019968_spacer_38 | 31 | prophage         | KBTCE3-3 prophage      | 12 | 100  | 6.67E-01 | hypothetical protein | * |
| KBVC1 | I-E | 39 | KBVC1_CP019968_spacer_39 | 32 | no hits          |                        |    |      |          |                      | * |
| KBVC1 | I-E | 40 | KBVC1_CP019968_spacer_40 | 32 | no hits          |                        |    |      |          |                      | * |
| KBVC1 | I-E | 41 | KBVC1_CP019968_spacer_41 | 34 | no hits          |                        |    |      |          |                      | * |



**Table S5.** Integrative Mobilizable Elements (IMEs) found targeted by the CRISPR systems of *D. mccartyi* KBVC1 and KBDCA3. Nucleotide sequences in File S5.

| <i>D. mccartyi</i> host strain             | circularized? | evidence for circularization                                      | type                       | name         | notes                  |
|--------------------------------------------|---------------|-------------------------------------------------------------------|----------------------------|--------------|------------------------|
| <i>D. mccartyi</i> contigs from metagenome | yes           | Illumina sequencing: mate-pair and paired-end                     | IME1                       | Dmc IME1-1   |                        |
| <i>D. mccartyi</i> contigs from metagenome | yes           | Illumina sequencing: mate-pair and paired-end                     | IME1                       | Dmc IME1-2   |                        |
| <i>D. mccartyi</i> contigs from metagenome |               |                                                                   | IME1                       | Dmc IME1-3   |                        |
| <i>D. mccartyi</i> contigs from metagenome |               |                                                                   | IME1                       | Dmc IME1-4   |                        |
| <i>D. mccartyi</i> contigs from metagenome |               |                                                                   | IME1                       | Dmc IME1-5   |                        |
| <i>D. mccartyi</i> contigs from metagenome |               |                                                                   | IME1                       | Dmc IME1-6   |                        |
| <i>D. mccartyi</i> contigs from metagenome |               |                                                                   | IME1                       | Dmc IME1-7   |                        |
| KBTCE2                                     |               |                                                                   | IME1                       | Dmc IME1-8   |                        |
| KBVC1                                      | yes           | Illumina sequencing: mate-pair and paired-end                     | IME1                       | Dmc IME1-9   |                        |
| KBDCA1                                     |               |                                                                   | IME1                       | Dmc IME1-10  |                        |
| KBDCA1                                     |               |                                                                   | IME1                       | Dmc IME1-11  |                        |
| KBDCA2                                     |               |                                                                   | IME1                       | Dmc IME1-12  |                        |
| WBC-2                                      |               |                                                                   | IME1                       | Dmc IME1-13  |                        |
| BAV1                                       |               |                                                                   | IME1                       | Dmc IME1-14  |                        |
| 195                                        | yes           | published as tandem repeat                                        | IME1                       | Dmc IME1-15  |                        |
| 11a5                                       |               |                                                                   | IME2                       | Dmc IME2     | no <i>rdhA</i>         |
| BAV1                                       |               |                                                                   | <i>rdhA</i> containing IME | Dmc IME-OG24 | <i>rdhA</i> containing |
| DCMB5                                      |               |                                                                   | <i>rdhA</i> containing IME | Dmc IME-OG49 | <i>rdhA</i> containing |
| KBVC1, KBVC2, KBTCE1, WBC-2                | yes           | 1) Illumina sequencing: mate-pair and paired-end 2) qPCR plus PCR | <i>rdhA</i> containing IME | Dmc IME-vcrA | <i>rdhA</i> containing |
| 195, KBTCE2, KBTCE3                        |               | sequence alignments indicate mobilization in last 100 years       | <i>rdhA</i> containing IME | Dmc IME-tceA | <i>rdhA</i> containing |

**Table S6.** IME1-like constructs found in other bacteria whose genomes are available in NCBI

| Phylum  | Class        | Species                                   | NCBI Accession                | # plasmids published on NCBI | # IME1-like constructs in genome | is IME1-like construct adjacent to prophage | CRISPR type if present | Do CRISPR spacers have matches to IME1-like sequence? |
|---------|--------------|-------------------------------------------|-------------------------------|------------------------------|----------------------------------|---------------------------------------------|------------------------|-------------------------------------------------------|
| Proteo. | Betaproteo.  | <i>Nitrosomonas communis</i>              | <a href="#">NZ_CP011451.1</a> | 0                            | 1                                | no                                          |                        |                                                       |
| Proteo. | Betaproteo.  | <i>Paucibacter</i> sp. KCTC               | <a href="#">NZ_CP013692.1</a> | 0                            | 1                                | yes                                         |                        |                                                       |
| Proteo. | Betaproteo.  | <i>Ralstonia solanacearum</i> FJACT-1458  | <a href="#">NZ_CP016554.1</a> | 1 MP                         | 3                                | no                                          |                        |                                                       |
| Proteo. | Betaproteo.  | <i>Ralstonia solanacearum</i> FJAT-91     | <a href="#">NZ_CP016612.1</a> | 1 MP                         | 4                                | no                                          |                        |                                                       |
| Proteo. | Betaproteo.  | <i>Ralstonia solanacearum</i> CMR15       | <a href="#">NC_017559.1</a>   | 1+ 1 MP                      | 1                                | no                                          |                        |                                                       |
| Proteo. | Betaproteo.  | <i>Ralstonia solanacearum</i> p082        | <a href="#">NC_017574.1</a>   | 1 MP                         | 1                                | yes                                         | CAS-I-E                | yes                                                   |
| Proteo. | Betaproteo.  | <i>Ralstonia solanacearum</i> pS107       | <a href="#">NC_014311.1</a>   | 1 MP                         | 1                                | yes                                         |                        |                                                       |
| Proteo. | Betaproteo.  | <i>Ralstonia solanacearum</i> GM1000      | <a href="#">NC_003295.1</a>   | 1 MP                         | 2                                | yes                                         |                        |                                                       |
| Proteo. | Betaproteo.  | <i>Ralstonia solanacearum</i> OE1-1       | <a href="#">NZ_CP009764.1</a> | 1 MP                         | 1                                | yes                                         |                        |                                                       |
| Proteo. | Betaproteo.  | <i>Hydrogenophaga</i> sp. PBC             | <a href="#">NZ_CP017311.1</a> | 0                            | 2                                | tandem duplicate                            |                        |                                                       |
| Proteo. | Betaproteo.  | <i>Rugosibacter aromaticivorans</i>       | <a href="#">CP010554.1</a>    | 0                            | 1                                | yes                                         |                        |                                                       |
| Proteo. | Betaproteo.  | <i>Janthinobacterium marseille</i>        | <a href="#">NC_009659.1</a>   | 0                            | 1                                | yes                                         |                        |                                                       |
| Proteo. | Betaproteo.  | <i>Acidovorax ebreus</i>                  | <a href="#">NC_011992.1</a>   | 0                            | 1                                | yes                                         |                        |                                                       |
| Proteo. | Betaproteo.  | <i>Burkholderiales bacterium</i> GJ-E10   | <a href="#">NZ_AP014683.1</a> | 0                            | 1                                | yes                                         |                        |                                                       |
| Proteo. | Betaproteo.  | <i>Comamonadaceae bacterium</i> B1        | <a href="#">NZ_AP014569.1</a> | 1                            | 1                                | yes                                         |                        |                                                       |
| Proteo. | Betaproteo.  | <i>Cupriavidus gilardii</i>               | <a href="#">NZ_CP010516.1</a> | 0                            | 1                                | yes                                         |                        |                                                       |
| Proteo. | Betaproteo.  | <i>Polyangium brachysporum</i>            | <a href="#">NZ_CP011371.1</a> | 0                            | 1                                | yes                                         |                        |                                                       |
| Proteo. | Betaproteo.  | <i>Variovorax</i> sp. HW608               | <a href="#">NZ_LT607803.1</a> | 0                            | 1                                | yes                                         |                        |                                                       |
| Proteo. | Betaproteo.  | <i>Alicyclophilus denitrificans</i> K601  | <a href="#">NC_015422.1</a>   | 1                            | 1                                | yes                                         | CAS-II-C               | no                                                    |
| Proteo. | Betaproteo.  | <i>Burkholderia vietnamiensis</i> G4      | <a href="#">CP000614.1</a>    | 5                            | 1                                | yes                                         |                        |                                                       |
| Proteo. | Gammaproteo. | <i>Hahella chejunsis</i>                  | <a href="#">NC_007645.1</a>   | 0                            | 1                                | yes                                         | CAS-I-C                | no                                                    |
| Proteo. | Gammaproteo. | <i>Stenotrophomonas maltophilia</i> K279a | <a href="#">NC_010943.1</a>   | 2                            | 1                                | yes                                         |                        |                                                       |
| Proteo. | Gammaproteo. | <i>Lysobacter gummosus</i>                | <a href="#">NZ_CP011131.1</a> | 0                            | 1                                | yes                                         |                        |                                                       |
| Proteo. | Gammaproteo. | <i>Xanthomonas albilineans</i>            | <a href="#">NC_013722.1</a>   | 3                            | 1                                | yes                                         | CAS-I-C and I-F        | yes                                                   |
| Proteo. | Deltaproteo. | <i>Desulfovibrio vulgaris</i> DP4         | <a href="#">NC_008751.1</a>   | 1                            | 1                                | yes                                         |                        |                                                       |



|         |                   |                                            |                               |          |   |     |                                 |    |
|---------|-------------------|--------------------------------------------|-------------------------------|----------|---|-----|---------------------------------|----|
| Proteo. | Deltaproteo.      | <i>Desulfarculus baarsii</i>               | <a href="#">NC_014365.1</a>   | 0        | 1 | yes | CAS-I-C<br>and III-D<br>CAS-I-E | no |
| Proteo. | Deltaproteo.      | <i>Geobacter sulfurreducens</i> AM-1       | <a href="#">NZ_CP010430.1</a> | 0        | 1 | yes | and I-U                         | no |
| Proteo. | Acidithiobacillia | <i>Acidithiobacillus caldus</i> ATCC 51756 | <a href="#">NZ_CP005986.1</a> | 2 + 1 MP | 1 | yes | CAS-IV-A                        | no |
| Nitro.  | Nitrospira        | <i>Nitrospira defluvii</i>                 | <a href="#">NC_014355.1</a>   | 0        | 1 | yes | CAS-I-E                         | no |

Proteo-Proteobacteria, Nitro-Nitrospirae, MP- Megaplasmid

**Table S7.** Quantitative PCR (qPCR) raw data used to make Figure 5 & S8. *Dhc* - *Dehalococcoides mccartyi*. DNA extracts from 2mL culture.

| Sub-culture | Day | See Figure in text | number of qPCR reactions <i>vcrA</i> | number of qPCR reactions <i>Dhc</i> | Raw data - Mean Starting Quantity (copies/uL) or calculated as range if from 2 qPCR reactions |                     | Concentration in culture (copies/mL culture) |                     | Ratio           |
|-------------|-----|--------------------|--------------------------------------|-------------------------------------|-----------------------------------------------------------------------------------------------|---------------------|----------------------------------------------|---------------------|-----------------|
|             |     |                    |                                      |                                     | <i>vcrA</i>                                                                                   | <i>Dhc</i> 16S rRNA | <i>vcrA</i>                                  | <i>Dhc</i> 16S rRNA | <i>vcrA/Dhc</i> |
| KB1/VC-ME b | 0   | 5                  | 3                                    | 2                                   | 3.98E+06                                                                                      | 3.33E+06            | 1.99E+09                                     | 1.67E+09            | 1.2             |
| KB1/VC-ME b | 2   | 5                  | 2                                    | 3                                   | 3.06E+06                                                                                      | 2.54E+06            | 1.53E+09                                     | 1.27E+09            | 1.2             |
| KB1/VC-ME b | 5   | 5                  | 3                                    | 2                                   | 4.52E+06                                                                                      | 3.35E+06            | 2.26E+09                                     | 1.67E+09            | 1.3             |
| KB1/VC-ME b | 7   | 5                  | 3                                    | 3                                   | 4.33E+06                                                                                      | 3.64E+06            | 2.17E+09                                     | 1.82E+09            | 1.2             |
| KB1/VC-ME b | 9   | 5                  | 2                                    | 3                                   | 4.47E+06                                                                                      | 3.62E+06            | 2.23E+09                                     | 1.81E+09            | 1.2             |
| KB1/VC-ME b | 12  | 5                  | 2                                    | 3                                   | 3.49E+06                                                                                      | 2.97E+06            | 1.75E+09                                     | 1.48E+09            | 1.2             |
| KB1/VC-ME b | 16  | 5                  | 3                                    | 3                                   | 3.76E+06                                                                                      | 3.20E+06            | 1.88E+09                                     | 1.60E+09            | 1.2             |
| KB1/VC-ME b | 19  | 5                  | 3                                    | 2                                   | 3.99E+06                                                                                      | 3.37E+06            | 2.00E+09                                     | 1.69E+09            | 1.2             |
| KB1/VC-ME b | 21  | 5                  | 3                                    | 2                                   | 3.72E+06                                                                                      | 3.19E+06            | 1.86E+09                                     | 1.59E+09            | 1.2             |
| KB1/VC-ME b | 23  | 5                  | 3                                    | 2                                   | 6.28E+06                                                                                      | 3.31E+06            | 3.14E+09                                     | 1.66E+09            | 1.9             |
| KB1/VC-ME b | 26  | 5                  | 2                                    | 2                                   | 7.32E+06                                                                                      | 3.49E+06            | 3.66E+09                                     | 1.75E+09            | 2.1             |
| KB1/VC-ME b | 30  | 5                  | 3                                    | 3                                   | 5.64E+06                                                                                      | 3.39E+06            | 2.82E+09                                     | 1.70E+09            | 1.7             |
| KB1/VC-ME b | 35  | 5                  | 2                                    | 2                                   | 5.30E+06                                                                                      | 3.32E+06            | 2.65E+09                                     | 1.66E+09            | 1.6             |
| KB1/VC-ME b | 37  | 5                  | 3                                    | 3                                   | 5.68E+06                                                                                      | 3.79E+06            | 2.84E+09                                     | 1.90E+09            | 1.5             |
| KB1/VC-ME b | 40  | 5                  | 3                                    | 3                                   | 4.50E+06                                                                                      | 3.46E+06            | 2.25E+09                                     | 1.73E+09            | 1.3             |
| KB1/VC-ME c | 0   | S8 (b)             | 3                                    | 3                                   | 4.76E+06                                                                                      | 3.82E+06            | 2.38E+09                                     | 1.91E+09            | 1.2             |
| KB1/VC-ME c | 2   | S8 (b)             | 3                                    | 3                                   | 4.72E+06                                                                                      | 3.65E+06            | 2.36E+09                                     | 1.82E+09            | 1.3             |
| KB1/VC-ME c | 5   | S8 (b)             | 3                                    | 2                                   | 5.25E+06                                                                                      | 5.08E+06            | 2.62E+09                                     | 2.54E+09            | 1.0             |
| KB1/VC-ME c | 7   | S8 (b)             | 3                                    | 2                                   | 6.06E+06                                                                                      | 5.91E+06            | 3.03E+09                                     | 2.96E+09            | 1.0             |
| KB1/VC-ME c | 9   | S8 (b)             | 3                                    | 3                                   | 4.94E+06                                                                                      | 5.08E+06            | 2.47E+09                                     | 2.54E+09            | 1.0             |
| KB1/VC-ME c | 12  | S8 (b)             | 3                                    | 2                                   | 4.76E+06                                                                                      | 3.70E+06            | 2.38E+09                                     | 1.85E+09            | 1.3             |
| KB1/VC-ME c | 16  | S8 (b)             | 3                                    | 3                                   | 4.57E+06                                                                                      | 3.83E+06            | 2.28E+09                                     | 1.91E+09            | 1.2             |
| KB1/VC-ME c | 19  | S8 (b)             | 3                                    | 3                                   | 2.75E+06                                                                                      | 2.76E+06            | 1.37E+09                                     | 1.38E+09            | 1.0             |

|             |    |        |   |   |          |          |          |          |     |
|-------------|----|--------|---|---|----------|----------|----------|----------|-----|
| KB1/VC-ME c | 21 | S8 (b) | 3 | 3 | 4.17E+06 | 2.37E+06 | 2.09E+09 | 1.19E+09 | 1.8 |
| KB1/VC-ME c | 23 | S8 (b) | 3 | 3 | 5.48E+06 | 3.49E+06 | 2.74E+09 | 1.74E+09 | 1.6 |
| KB1/VC-ME c | 26 | S8 (b) | 3 | 3 | 5.85E+06 | 3.58E+06 | 2.93E+09 | 1.79E+09 | 1.6 |
| KB1/VC-ME c | 30 | S8 (b) | 3 | 3 | 6.91E+06 | 4.26E+06 | 3.45E+09 | 2.13E+09 | 1.6 |
| KB1/VC-ME c | 35 | S8 (b) | 3 | 3 | 5.08E+06 | 3.35E+06 | 2.54E+09 | 1.68E+09 | 1.5 |
| KB1/VC-ME c | 37 | S8 (b) | 3 | 3 | 3.99E+06 | 2.46E+06 | 1.99E+09 | 1.23E+09 | 1.6 |
| KB1/VC-ME c | 40 | S8 (b) | 3 | 3 | 5.10E+06 | 3.50E+06 | 2.55E+09 | 1.75E+09 | 1.5 |
| KB1/VC-ME a | 0  | S8 (a) | 3 | 3 | 3.26E+06 | 2.71E+06 | 1.63E+09 | 1.36E+09 | 1.2 |
| KB1/VC-ME a | 2  | S8 (a) | 3 | 2 | 3.36E+06 | 2.72E+06 | 1.68E+09 | 1.36E+09 | 1.2 |
| KB1/VC-ME a | 5  | S8 (a) | 3 | 3 | 4.56E+06 | 2.87E+06 | 2.28E+09 | 1.44E+09 | 1.6 |
| KB1/VC-ME a | 7  | S8 (a) | 3 | 2 | 5.24E+06 | 2.81E+06 | 2.62E+09 | 1.40E+09 | 1.9 |
| KB1/VC-ME a | 9  | S8 (a) | 3 | 2 | 4.63E+06 | 2.94E+06 | 2.31E+09 | 1.47E+09 | 1.6 |
| KB1/VC-ME a | 12 | S8 (a) | 3 | 3 | 3.19E+06 | 2.58E+06 | 1.59E+09 | 1.29E+09 | 1.2 |
| KB1/VC-ME a | 16 | S8 (a) | 3 | 2 | 3.13E+06 | 2.24E+06 | 1.56E+09 | 1.12E+09 | 1.4 |
| KB1/VC-ME a | 19 | S8 (a) | 3 | 2 | 3.16E+06 | 2.14E+06 | 1.58E+09 | 1.07E+09 | 1.5 |
| KB1/VC-ME a | 21 | S8 (a) | 3 | 3 | 2.74E+06 | 1.86E+06 | 1.37E+09 | 9.32E+08 | 1.5 |
| KB1/VC-ME a | 23 | S8 (a) | 3 | 3 | 3.13E+06 | 2.09E+06 | 1.56E+09 | 1.05E+09 | 1.5 |
| KB1/VC-ME a | 30 | S8 (a) | 3 | 3 | 5.08E+06 | 2.24E+06 | 2.54E+09 | 1.12E+09 | 2.3 |
| KB1/VC-ME a | 35 | S8 (a) | 3 | 2 | 3.26E+06 | 2.49E+06 | 1.63E+09 | 1.25E+09 | 1.3 |
| KB1/VC-ME a | 40 | S8 (a) | 3 | 2 | 3.44E+06 | 3.06E+06 | 1.72E+09 | 1.53E+09 | 1.1 |

**Table S8.** Details of standard curves generated for qPCR including slope, efficiency, R2, and Y-intercepts. *Dhc* - *Dehalococcoides mccartyi*

| Run # | Samples quantified    | gene target         | slope  | y-intercept | efficiency | R <sup>2</sup> |
|-------|-----------------------|---------------------|--------|-------------|------------|----------------|
| 1     | KB1/VC-ME a day 0-12  | <i>Dhc</i> 16S rRNA | -3.905 | 38.2        | 80.3       | 0.997          |
| 1     | KB1/VC-ME a day 0-12  | <i>vcrA</i>         | -3.910 | 39.9        | 80.2       | 0.998          |
| 2     | KB1/VC-ME a day 16-40 | <i>Dhc</i> 16S rRNA | -3.918 | 39.0        | 80.0       | 0.999          |
| 2     | KB1/VC-ME a day 16-40 | <i>vcrA</i>         | -3.908 | 39.7        | 80.3       | 0.993          |
| 3     | KB1/VC-ME b day 0-40  | <i>Dhc</i> 16S rRNA | -3.916 | 41.4        | 80.0       | 0.998          |
| 3     | KB1/VC-ME b day 0-40  | <i>vcrA</i>         | -3.907 | 43.4        | 80.3       | 1.000          |
| 4     | KB1/VC-ME c day 0-16  | <i>Dhc</i> 16S rRNA | -3.841 | 39.5        | 80.7       | 1.000          |
| 4     | KB1/VC-ME c day 0-16  | <i>vcrA</i>         | -3.917 | 40.3        | 80.0       | 0.999          |
| 5     | KB1/VC-ME c day 19-40 | <i>Dhc</i> 16S rRNA | -3.912 | 40.7        | 80.1       | 0.996          |
| 5     | KB1/VC-ME c day 19-40 | <i>vcrA</i>         | -3.741 | 42.6        | 85.0       | 0.996          |

## References for Supplemental Information

1. Duhamel M, Wehr SD, Yu L, Rizvi H, Seepersad D, Dworatzek S, Cox EE, Edwards EA. Comparison of anaerobic dechlorinating enrichment cultures maintained on tetrachloroethene, trichloroethene, *cis*-dichloroethene and vinyl chloride. *Water Res.* 2002;36(17):4193-202.
2. Duhamel M, Mo K, Edwards EA. Characterization of a highly enriched *Dehalococcoides*-containing culture that grows on vinyl chloride and trichloroethene. *Appl Environ Microbiol.* 2004;70(9):5538-45.
3. Fineran PC, Gerritzen MJH, Suárez-Diez M, Künne T, Boekhorst J, van Hijum SAFT, Staals RHJ, Brouns SJJ. Degenerate target sites mediate rapid primed CRISPR adaptation. *Proc Natl Acad Sci USA.* 2014;111(16):E1629-E38.
