# Supplementary material
Source: PubMed Central journal article supplement (PMC6299113)
Supplement: 41396_2018_254_MOESM2_ESM.pdf [file 41396_2018_254_MOESM2_ESM.pdf]

>2016 KB1-VC/H2 CRISPR I-E array

AGAATATGACGTAGCACTTCTTTTTTTAAGTGCCTACCCTACGAGCAAGGCTACACGGGCAT  
TTTCATCCGAAAGCTAAAGCGGTTACCCCCACATGCGTGGGGAATACCCCTCCGTTCCCT  
TTATTAGAGATATTTAACCGGTTACCCCCACATGCGTGGGGAATACCCTAACCGACAATTA  
DCACATAACTCGCCCTGCGGTTACCCCCACATGCGTGGGGAATACATAATGGACGCTGTGG  
AACTGTAGAGATGCACGGTTACCCCCACATGCGTGGGGAATACTGCCGCAAATAGTGC  
CCACATGGCGCCTATCGGTTACCCCCACATGCGTGGGGAATACTGGGGCTAAGATGCACGA  
ATACATAGTCAACTACGGTTACCCCCACATGCGTGGGGAATACATCGCTAGGGCTTGCCGA  
ACTAAGTATTTACTCCGGTTACCCCCACATGCGTGGGGAATACCACGCAGTAATATAATAT  
TCATTCACATAAGGCGGTTACCCCCACATGCGTGGGGAATACGGTTGGGGAGAATACTGTA  
AGGCTTCCGAGGACGGTTACCCCCACATGCGTGGGGAATACACCAGCTAGTGAATTAATA  
CTAATAATGCGACCGGTTACCCCCACATGCGTGGGGAATACCAATAGGAAAAGTCTTGTC  
ATCCCTTCCAGCGGTTACCCCCACATGCGTGGGGAATACACCTTCAATTTT CAGAAGCTAG  
TTTGGGAGAGACGGTTACCCCCACATGCGTGGGGAATACTCTCTGGCTAGTTGTTCTAT  
GATTGCATCACGGTTACCCCCNACATGCGTGGGGAATACTTTGTTCTTTGAAATATGCCGC  
ATCGCTAGGGCGGTTACCCCCACATGCGTGGGGAATACCTAGGAGTCAAGCATCGAGTAG  
CCAAAGAGGCCGGTTACCCCCACATGCGTGGGGAATACAGACAGATGTGCGTATAAACGG  
GTGGTCATCTCGGTTACCCCCACATGCGTGGGGAATACTTCCACCAGAWCGAAGCGTTTT  
WCATAACCACCGGTTACCCCCACATGCGTGGGGAATACTTTAGTCTTTTCGCTACCCATCC  
TGTAGTTCCAGGTTACCCCCACATGCGTGGGGAATACGTCTCTGGACATATCACCGCTGGC  
CTTGATTTCCGGTTACCCCCACATGCGTGGGGAATACGCAGTAGAGGATATCCCGTCTTGGC  
CCGCGTTCGGTTACCCCCACATGCGTGGGGAATACGTGCATCTATTGCGTACCGCCAGTMC  
ACGTKCSGKTYACCCCCACA KSKKGGGAWWASKGSAGCCACA KTKWGGACASTKYAC  
RGCTRTCCGKTYMACCCCCMMWTGSKKGGGAWWMCCCWGGYRMAAYTGAARMAGACM  
AGGAMYTKACRCKKYWCMCCMCAYRTGYGKGGRRATMCKTRYGRWAYGGRMSGWRT  
MGGCRGRATTRMRSKSKYACMCCMCACRYGYGKGGRRWAYRYWCSKKAWSGCYCRTA  
WWGGCAKSWGWRRAGACSGGTYACCCCCMCWKSGTGGGRAWWAYGTWKMCSTWYA  
TAWTGSCAYAAAAKAGMYACGGTYACCCCCMCKWSSKGGGRAWWASTAYTSCCTATA  
TWTACCRMAAAAGWAGMWACSGTTACCCCCMCATGCGTGGGGAATACTWCTGGCTATG  
GTGCATGGAAACAGATGAATTCGGTTACCCCCACATGCGTGGGGAATACGGGTBTACAGC  
GTGAAAATGGTCTAAACGCCACGGTTACCCCCACATGCGTGGGGAATACTTATAGTTGTGT  
ATGATGAGCCAGAATTAGTACGGTTACCCCCACATGCGTGGGGAATACTTGGTAACCG  
GCTTTGATAACCATGCTAACGGTTACCCCCACATGCGTGGGGAATACACCAATGGTTAGAG  
GTGCACCCTTTTTGTAGCCGGTTACCCCCACATGCGTGGGGAATACTTCTCCCGCACAAAG  
CACATAACCCGTTGCTCCGGTTACCCCCACATGCGTGGGGAATACTATCATATGGCACTAG  
GGGGTGTTCAGATCCGGTNCACCCCCACATGCGTGGGGAATACCCCTCAATACAGTACG  
ACTCGCAATTAGTACCGGTTACCCCCACATGCGTGGGGAATACGCGTCCATCATATGGCTG  
TACTGGTGGGTGGTCCGGTTACCCCCACATGCGTGGGGAATACTTCAGCTGCTTTTTCGGGCT  
TGTCACCTTGTCCGGTTACCCCCACATGCGTGGGGAATACCATTYTTTTTGAMTGATTTTT  
MTCTCGGCTGTCGGTTACCCCCACATGCGTGGGGAATACTAGCTAGTGAGTTGACTACTAA  
TAATGCCACTCGGTTACCCCCACATGCGTGGGGAATACGTTTGACGTCTTTGAGTTGTCTGG  
CATATTGCGGTTACCCYCACATGCGTGGGGAATAACKGCTCGCATYGAAGCCAGAACGKCC  
AGCTTGCCGGTTACCCCCACATGCGTGGGGAATACTCTTTGATAGCGGTCAAGTCAACCAG  
CCCCATCGGTTACCCCCACATGCGTGGGGAATACCTAAAATAACAAAGCTGACCTTAAAC  
AGGTCATCCTGATAGGGAT

>2015 KB1-VC/H2 CRISPR I-E array

GGGCAGAATATGACGTAGCACTTCTTTTTTTAAGTGCCTACCCTACGAGCAAGGCTACACGG  
GCATTTTCATCCGAAAGCTAAAGCGGTTACCCCCACATGCGTGGGGAATACCCCCTCCGTT  
CCCTTTATTAGAGATATTTAACCGGTTACCCCCACATGCGTGGGGAATACCCTAACCGACA  
ATTAGCACATAACTCGCCCTGCGGTTACCCCCACATGCGTGGGGAATACATAATGGACGCT  
GTGGAAGTGTAGAGATGCACGGTTACCCCCACATGCGTGGGGAATACACTGCCGCAAATA  
GTGCCACATGGCGCCTATCGGTTACCCCCACATGCGTGGGGAATACTGGGGCTAAGATGC  
ACGAATACATAGTCAACTACGGTTACCCCCACATGCGTGGGGAATACATCGCTAGGGCTTG  
CCGAACTAAGTATTTACTCCGGTTACCCCCACATGCGTGGGGAATACCACGCAGTAATATA  
ATATTCATTACATAAGGCGGTTACCCCCACATGCGTGGGGAATACGGTTGGGGAGAATAC  
TGTAAGGCTTCCGAGGACGGTTACCCCCACATGCGTGGGGAATACACCAGCTAGTGAATTA  
ACTACTAATAATGCGACCGGTTACCCCCACATGCGTGGGGAATACCAATAGGAAAAGTCTT  
GTCAATTCCTTCCAGCGGTTACCCCCACATGCGTGGGGAATACACCTTCAATTTCAGAAG  
CTAGTTTGGGAGAGACGGTTACCCCCACATGCGTGGGGAATACACTCTCTGGCTAGTTGTT  
CTATGATTGCATACGGTTACCCCCACATGCGTGGGGAATACTTTGTTCTTTGAAATATGCC  
GCATCGCTAGGGCGGTTACCCCCACATGCGTGGGGAATACCTAGGAGTCAAGCATCGAGT  
AGCCAAAGAGGCCGGTTACCCCCACATGCGTGGGGAATACAGACAGATGTGCGTATAAAC  
GGGTGGTCATCTCGGTTACCCCCACATGCGTGGGGAATACTTCCACCAGAACGAAGCGTTT  
TTCATAACCACCGGTTACCCCCACATGCGTGGGGAATACTTTAGTCTTTTCGCTACCCATCC  
TGTAAGTTCCAGGTTACCCCCACATGCGTGGGGAATACGTCTCTGGACATATCACCGCTGGC  
CTTGATTTCCGGTTACCCCCACATGCGTGGGGAATACGCAGTAGAGGATATCCCGTCTTGGC  
CCGCGTTCGGTTACCCCCACATGCGTGGGGAATACGTGCATCTATTGCGTACCGCCAGTAC  
AGGTGCCGGTTACCCCCACATGCGTGGGGAATACGGGAGCCACATTTAGGACAGTTCATG  
GCTATCCGGTTACCCCCACATGCGTGGGGAATACCCTGGTGAAGTGAAGAAGACAAGGA  
ACTGACACGGTTACCCCCACATGCGTGGGGAATACGTACGGTCTGGGCCGTATAGGCAGG  
ATTGAGGGCGGTTACCCCCACATGCGTGGGGAATACTCCTGAACGCTCATAATGGCATCTG  
AAGAGACCGGTTACCCCCACATGCGTGGGGAATACGTATCCCCTATATATTGCCACAAAAA  
TAGCTACGGTTACCCCCACATGCGTGGGGAATACTACTGGCTATGGTGCATGGAAACAGAT  
GAATTCGGTTACCCCCACATGCGTGGGGAATACGGGTBTACAGCGTGAAAATGGTCTAAAC  
GCCMCGGTTACCCCCACATGCGTGGGGAATACTTATAGTWGTGTATGATGAGCCAGAATT  
AGTACGGTTACCCCCACATGCGTGGGGAATACAACCTGGTAACCGGCTTTGATAACCATGC  
TAACGGTTACCCCCACATGCGTGGGGAATACACCAATGGTTAGAGGTGCACCCTTTTTGTA  
GCCGGTTACCCCCACATGCGTGGGGAATACTTCTCCCGCACAAGGCACATAACCCCGTTGCT  
CCGGTTACCCCCACATGCGTGGGGAATACTATCATATGGCACTAGGGGGTGTGTCAGATC  
CGGTTACCCCCACATGCGTGGGGAATACCCCTCAATACAGTACGACTCGCAATTAGTACC  
GGTTACCCCCACATGCGTGGGGAATACGCGTCCATCATATGGCTGTACTGGTGGGTGGTCCG  
GTTACCCCCACATGCGTGGGGAATACTTCAGCTGCTTTTTTCGGGCTTGCCACCTTGTCGGG  
TTCACCCCCACATGCGTGGGGAATACCATTCTTTTTGACWGATTTTTATCTCGGCTGTCGGTT  
CACCCCCACATGCGTGGGGAATACTAGCTAGTGAGTTGACTACTAATAATGCCACTCGGTTCC  
ACCCCCACATGCGTGGGGAATACGTTTGACGTCTTTGAGTTGTCTGGCATATTGCGGTTACCC  
CCCACATGCGTGGGGAATACGGCTCGCATTGAAGCCAGAACGGCCAGCTTGCCGGTTACCCC  
CCACATGCGTGGGGAATACTCTTTGATAGCGGTCAAGTACCACGCCCATCGGTTACCCS  
CACATGCGTGGGGAATACCTAAAATAACAAAGCTGACCTAAAACAGGTATCCTGATAGG

>2013 KB1-VC/H2 CRISPR I-E array

CAGAATATGACGTAGCACTTCTTTTTTTAAGTGCCTACCCTACGAGCAAGGCTACACGGGCA  
TTTTTCATCCGAAAGCTAAAGCGGTTACCCCCACATGCGTGGGGAATACCCCCTCCGTTCCC  
TTTATTAGAGATATTTAACCGGTTACCCCCACATGCGTGGGGAATACCCTAACCGACAATT

AGCACATAACTCGCCCTGCGGTTACCCCCACATGCGTGGGGAATACATAATGGACGCTGTG  
GAACTGTAGAGATGCACGGTTACCCCCACATGCGTGGGGAATACACTGCCGCAAATAGTG  
CCCACATGGCGCCTATCGGTTACCCCCACATGCGTGGGGAATACTGGGGCTAAGATGCACG  
AATACATAGTCAACTACGGTTACCCCCACATGCGTGGGGAATACATCGCTAGGGCTTGCCG  
AACTAAGTATTTACTCCGGTTACCCCCACATGCGTGGGGAATACCACGCAGTAATATAATA  
TTCATTACATAAGGCGGTTACCCCCACATGCGTGGGGAATACGGTTGGGGAGAATACTGT  
AAGGCTTCCGAGGACGGTTACCCCCACATGCGTGGGGAATACACCAGCTAGTGAATTA  
ACTAATAATGCGACCGGTTACCCCCACATGCGTGGGGAATACCAATAGGAAAAGTCTTGT  
AATTCCCTTCCAGCGGTTACCCCCACATGCGTGGGGAATACACCTTCAATTTT  
GAGAAGCTA  
GTTTGGGAGAGACGGTTACCCCCACATGCGTGGGGAATACACTCTCTGGCTAGTTGTTCTA  
TGATTGCATCACGGTTACCCCCACATGCGTGGGGAATACTTTGTTCTTTGAAATATGCCGCA  
TCGCTAGGGCGGTTACCCCCACATGCGTGGGGAATACCTAGGAGTCAAGCATCGAGTAGC  
CAAAGAGGCCGGTTACCCCCACATGCGTGGGGAATACAGACAGATGTGCGTATAAACGGG  
TGGTCATCTCGGTTACCCCCACATGCSYGGGGAATASTTSCACCABAMCGAAACGHTWKAC  
ARAACCACCGGTTCAWCCCCACATGCGTGGGGAATACTTTGGTMKTTTCGSTACCYATCCTG  
WARYTCCAGGTTYAYCCCCAYATGYSTGGGGAATACGTSTCTGGACATATCWCCSTGGMC  
WTGATTYCRGKTCAMYCCCACWTGCGTGGGGAATACGCAGTAGAKGATATCCCGTCTTGGC  
CCGCGTTCGGTTACCCCCACATGCGTGGGGAATACGTGCATCTCTWGMGTACCGCCMGTW  
CAGGTGCCGGTTACCYCCACWYGSRWGGGGAATWCGGGAGCCACATKKARGACAGTTCA  
WGGCTATCCRGTTACCCCCACAWGCGTGGGGAATACCCTGGTGAACYGAAGAWGACAA  
GGA  
ACTGACACGGTTACCCYCACATGCGTKGGGAATACGTACGGTMKSGRCCGTATAGGC  
AGGATTGAGGGCGGTTACCCCCACATGYSWGGGGAATACTCCTGAAYGCTCATAAYGGCA  
TCTGAAGAGACCGGTTACCCCCACATGCGTGGGGAATACGTATCCCCTATATATTGCCACA  
AAAATAGCTACGGTTACCCCCACATGCGTGGGGAATACTACTGGCTATGGTGCATGGAAAC  
AGATGAATTCGGTNCACCCCCACATGCGTGGGGAATACGGGTYTACAGYGTGAAAATGSCA  
AAACRCCMCGKTTACCCCCACAWGCGTGGGGAATWCTYATARTWGTGTAKGAWRARCCA  
YAATTRGRASKKTTCAICYCCACAWGYGTGGGGAATACMACYKGGTAMCCGGCTTTKATA  
ACCATSCTAWYGGTTACCYCCACAYKCGTGGGGAATACACCAATGGTTAGAGGTGCACCC  
TTTTTGTAGCCGGTTACCCCCACATGCGTGGGGAATACTTCTCCCGCACAAAGGCACATA  
CCCGTTGCTCCGGTTACCCCCACATGCGTGGGGAATACTATCATATGGCACTAGGGGGTGT  
GCAGATCCGGTTACCCCCACWTKCGTWGGGAATACCCCTCAATMCAGTWYGACTCGCA  
AWTAGTWSGCGTTACCCCCACATGSGTGGGGAATMCGCGTCCATCATATGGCTGTACTGST  
SRGWGGTTCGGTTACCCCCACATGCGTGGGGAAWACTTCARMTGCTTTTTYGGKCWTGTCC  
RCYTTGTMCGGTTACCCCCACATKYGTGGGGAATMCCATTYTTTTKGAMWGATTTTTYMTS  
TCRKCMGTTCGGTTACCCCCACATGCGTGGGGAATWCTAGCTAKWGAGTTGRSTASTAATA  
MTGCCRSTSGGTTACCCCCACATGCGTGGGGAATACGTTTGACGTCTTTGAGTTKTCTGGCA  
TATTGCGGTTACCCCCACATGCGTGGGGAATAACKGCTMGCATYGAAGCCAGAACGGCCAG  
YTTGCCGGTTACCCCCACATGCGTGGGGAATACTCTTTGATAGCGGTCAAGTACCACGCC  
CCATCGGTTACCCSCACATGCGTGGGGAATACCTAAAATAACAAAGCTGACCTTAAAACAG  
GTCATCCTGATA

>2002 KB1-VC/H2 CRISPR I-E array

GGCAGATATATGACGTAGCACTTCTTTTTTTAAGTGCCTACCCTACGAGCAAGGCTACACGG  
GCATTTTCATCCGAAAGCTAAAGCGGTTACCCCCACATGCGTGGGGAATACCCCTCCGTT  
CCCTTTATTAGAGATATTTAACCGGTTACCCCCACATGCGTGGGGAATACCCTAACCGACA  
ATTAGCACATAACTCGCCCTGCGGTTACCCCCACATGCGTGGGGAATACATAATGGACGCT  
GTGGA  
ACTGTAGAGATGCACGGTTACCCCCACATGCGTGGGGAATACACTGCCGCAAATA

GTGCCACATGGCGCCTATCGGTTACCCCCACATGCGTGGGGAATACTGGGGCTAAGATGC  
ACGAATACATAGTCAACTACGGTTACCCCCACATGCGTGGGGAATACATCGCTAGGGCTTG  
CCGAACTAAGTATTTACTCCGGTTACCCCCACATGCGTGGGGAATACCACGCAGTAATATA  
ATATTCATTCACATAAGGCGGTTACCCCCACATGCGTGGGGAATACGGTTGGGGAGAATAC  
TGTAAGGCTTCCGAGGACGGTTACCCCCACATGCGTGGGGAATACACCAGCTAGTGAATTA  
ACTACTAATAATGCGACCGGTTACCCCCACATGCGTGGGGAATACCAATAGGAAAAGTCTT  
GTCAATTCCTTCCAGCGGTTACCCCCACATGCGTGGGGAATACACCTTCAATTTTCAGAAG  
CTAGTTTGGGAGAGACGGTTACCCCCACATGCGTGGGGAATACACTCTCTGGCTAGTTGTT  
CTATGATTGCATACGGTTACCCCCACATGCGTGGGGAATACTTTGTTCTTTGAAATATGCC  
GCATCGCTAGGGCGGTTACCCCCACATGCGTGGGGAATACCTAGGAGTCAAGCATCGAGT  
AGCCAAAGAGGCCGGTTACCCCCACATGCGTGGGGAATACAGACAGATGTGCGTATAAAC  
GGGTGNGTCATCTCGGTTACCCCCACATGCGTGGGGAATACTTCCACNAGAACGAAGCGTT  
TTTCATAACCACCGSTNCANCCCCACATGCGTGGGGAATACTTTAGTCTTTTCGCTACCCAT  
CCTGTAGTTCCAGGTTACCCCCACATGCGTGGGGAATACGTCTCTGGACATATCACCGCTG  
GCCTTGATTTTCGGTTACCCCCACATGCGTGGGGAATACGCAGTAGAGGATATCCCGTCTTG  
GCCCCGCTTCGGTTACCCCCACATGCGTGGGGAATACGTGCATCTATTGCGTACCGCCAGT  
ACAGGTGCCGGTTACCCCCACATGCGTGGGGAATACCCTGGTGAAACTGAAGAAGACAAG  
GAACTGACACGGTTACCCCCACATGCGTGGGGAATACGTACGGTCTGGGCCGTATAGGCA  
GGATTGAGGGCGGTTACCCCCACATGCGTGGGGAATACTCCTGAACGCTCATAATGGCATC  
TGAAGAGACCGGTTACCCCCACATGCGTGGGGAATACGTATCCCCTATATATTGCCACAAA  
AATAGCTACGGTTACCCCCACATGCGTGGGGAATACTACTGGCTATGGTGCATGGAAACAG  
ATNNGAATTCGGTTACCCCCACATGCGTGGGGAATACGGGTCTACAGCGTGAAAATGGTCT  
AAACGCCACGGTTACCCCCACATGCGTGGGGAATACTTATAGTTGTGTATGATGAGCCAGA  
ATTAGTACGGTTACCCCCACATGCGTGGGGAATACAACCTGGTAACCGGCTTTGATAACCA  
TGCTAACGGTTACCCCCACATGCGTGGGGAATACACCAATGGTTAGAGGTGCACCCTTTTT  
GTAGCCGGTTACCCCCACATGCGTGGGGAATACTTCTCCCGCACAAGGCACATACCCCGTT  
GCTCCGGTTACCCCCACATGCGTGGGGAATACTATCATATGGCACTAGGGGGTGTTCAGA  
TCCGGTTACCCCCACATGCGKGGGGAAYACCCCTCAAKACAGTMCGACTCGCAATTAGT  
ACCGGTTACCCCCACAKKYGTGGGGAATACGCKTYCATCATATRKCTGTACYRGTGRGTGG  
YCGGTTACCCCCACAWGCGTGGGGAATWCTTACGMTGCTTTTTSGGGCTWGTCCMCCTKG  
TSYGGTTCWCCCCACATKCGTGGGGAATRCCATTCTTTTGWCTGATTWTTATYTCGGCKG  
TCGGTTACCCCCACATGCGTGGGGAATWCTAGYTAGYAGTTGACTACTAATAATGCCACT  
CGGTTACCCCCACATGCGTGGGGAATACGTTTGACGTCTTTGAGTTGTCTGGCATATTGCG  
GTTACCCCCACATGCGTGGGGAATACCTAAAATAACAAAGCTGACCTTAAAACAGGTCATC  
CTGATAGG
