# Supplementary material
Source: PubMed Central journal article supplement (PMC6299113)
Supplement: 41396_2018_254_MOESM3_ESM.pdf [file 41396_2018_254_MOESM3_ESM.pdf]

>KBDCA3\_CP019946\_spacer\_37  
AATAATTTTAAACATATGCTTCTTTAGTATACCTA  
>KBDCA3\_CP019946\_spacer\_36  
GCCCTTATCATCAATAGCCACAGGACGTTTTAAATG  
>KBDCA3\_CP019946\_spacer\_35  
TCTTTTTACCTTTCCTAGCCGGATTACGATTAGGG  
>KBDCA3\_CP019946\_spacer\_34  
TAACGGTTTGTACCGTCTGTAGAAGCCCTTAATG  
>KBDCA3\_CP019946\_spacer\_33  
CCAAAAATCTTACCGGATGGGAGGCTTCAAAAATC  
>KBDCA3\_CP019946\_spacer\_32  
TTACAGGCTATAGTAGGCTATGAGGTGAATTGAG  
>KBDCA3\_CP019946\_spacer\_31  
CGGAGGTGTTGATCTGCCGCATCTCTAATTTGTT  
>KBDCA3\_CP019946\_spacer\_30  
TTATATCATTTTCCAATGCACTATACCCCTGATTT  
>KBDCA3\_CP019946\_spacer\_29  
TTCCTTACCTACTCCGTTACAGAACACCTTTGGG  
>KBDCA3\_CP019946\_spacer\_28  
TGGAGGTGTTCAAATGACAACGATACCGAAGG  
>KBDCA3\_CP019946\_spacer\_27  
CTGCCTCAGTAGAAACAACCAAAGCTATGGAT  
>KBDCA3\_CP019946\_spacer\_26  
GAGTGTTATACCTTGCTGCATAACCTGATAAACA  
>KBDCA3\_CP019946\_spacer\_25  
ACGCTAACATCTTCAACCCACGTATATTCACCTACCT  
>KBDCA3\_CP019946\_spacer\_24  
TTACACCTTTTGCTTGTGCCATAAGATGCTCATAACC  
>KBDCA3\_CP019946\_spacer\_23  
TTGATTTTTCGCTTCCAGACCGCCACGATATACTG  
>KBDCA3\_CP019946\_spacer\_22  
GACGATATCCTTGCCCGACTTCAGGGCGTCAAAAA  
>KBDCA3\_CP019946\_spacer\_21  
CCTAAAGGTATGTGCTTATTCCGCGTTTGATGCC  
>KBDCA3\_CP019946\_spacer\_20  
GCCATGACTAAAGAAGAAACCACCCAGTTAAAC  
>KBDCA3\_CP019946\_spacer\_19  
AAGGAACAGATAGCAAGAGAGTATAAGAACCGAA  
>KBDCA3\_CP019946\_spacer\_18  
AATCTGTTTCGAGACGCTGGTTATCGCATCCATAG  
>KBDCA3\_CP019946\_spacer\_17  
GTCGCCATTCCCGCCCTCTCTTTCTCGCGCAAATA  
>KBDCA3\_CP019946\_spacer\_16  
ATAAGGCAGCAAAAAATGACTGCTTATCTGTAA  
>KBDCA3\_CP019946\_spacer\_15  
TTTGCCCTTTAGTTCAGGTGTCAGTTTAGAGCGGA  
>KBDCA3\_CP019946\_spacer\_14  
GTTCTCTGCTGCAAATGGTTACTCCGGACTGGTTT  
>KBDCA3\_CP019946\_spacer\_13  
ATATTCTCTGGTTATTTTCAGTATCCATATGAATTA  
>KBDCA3\_CP019946\_spacer\_12

TGATTACCTTCAACTCATGAGTGA CTGCCACGAT  
>KBDCA3\_CP019946\_spacer\_11  
CACCAACAGCTACAGCAGGTATAAATACAGAACT  
>KBDCA3\_CP019946\_spacer\_10  
TTAGATCATCATTTGTAGCGTCTCCTTTAGCAATG  
>KBDCA3\_CP019946\_spacer\_9  
ACTATATCGCCATATATCAGGCAGGGCTAAAACC  
>KBDCA3\_CP019946\_spacer\_8  
GTTTAGGGTTATATCTTTACTCCCAAATAGCTTT  
>KBDCA3\_CP019946\_spacer\_7  
TCCATGCCAGCGGGCCTGACCGCCACAGATTATT  
>KBDCA3\_CP019946\_spacer\_6  
AGGTGTAGTGAGAGTACCGAGAGAAGTAGTAGAGG  
>KBDCA3\_CP019946\_spacer\_5  
GTCTAACGGTATAGCGTCATCCTCCCGAAGAAG  
>KBDCA3\_CP019946\_spacer\_4  
TTTTAATTCAGAAGTACTACACGGATACGTT  
>KBDCA3\_CP019946\_spacer\_3  
ATTTACCCGCTGATAAAATCGTACGTGATGCCAC  
>KBDCA3\_CP019946\_spacer\_2  
GCCCAACAATAATGGCGCGTATAACGGCTCTCCC  
>KBDCA3\_CP019946\_spacer\_1  
AGTATACCCAAAGCTAAATAATGCTAGAGTTGTT  
>DCMB5\_CP004079\_I-C\_spacer\_1  
ATAATAATTTTAACATATGCTTCTTTAGTATACCTA  
>DCMB5\_CP004079\_I-C\_spacer\_2  
ACAAAGATATAAGACAATGGGTAACGCAGTGACCA  
>DCMB5\_CP004079\_I-C\_spacer\_3  
CTGGTGGAAGGGCGAAGTAGTATACGAGGAGG  
>DCMB5\_CP004079\_I-C\_spacer\_4  
GCCCACACCTCGCAATGCCAGGTATCCGGTACG  
>DCMB5\_CP004079\_I-C\_spacer\_5  
CCAGTGTATTTTCAGTTGGTTTCAGCGAGTATATA  
>DCMB5\_CP004079\_I-C\_spacer\_6  
CATGGAGAAATGGCAGGTCACAACCCCGCTAGC  
>DCMB5\_CP004079\_I-C\_spacer\_7  
TCCAGAGGCTGTAGAATGGCATAAGAAGGCAG  
>DCMB5\_CP004079\_I-C\_spacer\_8  
TAGTTATTGTAGCCAGGGACAGCCAATTAATTA  
>DCMB5\_CP004079\_I-C\_spacer\_9  
GTACTCCGGCAGAGACTTTCTTTACCAGAGGTAAA  
>DCMB5\_CP004079\_I-C\_spacer\_10  
TATTTACGCGTTTTACACCGGTTATGTCTTTATGG  
>DCMB5\_CP004079\_I-C\_spacer\_11  
TTAGAGCCAGATGGCACGCATAGGGAGAGTCA  
>DCMB5\_CP004079\_I-C\_spacer\_12  
TCATCTGGATGAGCTATACGTTGCTAAAGT  
>DCMB5\_CP004079\_I-C\_spacer\_13  
GATAGTCAAATAATGCGTCTAGCCCATCGTAGCA  
>DCMB5\_CP004079\_I-C\_spacer\_14  
TTGTGTCGTTATGCTGTGAATACGCTGAGTACGA

>DCMB5\_CP004079\_I-C\_spacer\_15  
AAGGATAGCTTAGATATTGGTGTACATCAGGAGT  
>DCMB5\_CP004079\_I-C\_spacer\_16  
CGTATATCCTCACCTAATAATTATACTCCATCGTC  
>DCMB5\_CP004079\_I-C\_spacer\_17  
GGGCTCATCCTGTTAGTGTGTGAGGTAAGTACTAGAGTCC  
>DCMB5\_CP004079\_I-C\_spacer\_18  
GACGTCAATGAAAAAATTTATTAGTCTATTGGAAAT  
>DCMB5\_CP004079\_I-C\_spacer\_19  
AAGGAATGCAAGACCGTGCGAGACGCACTTAATTGGA  
>DCMB5\_CP004079\_I-C\_spacer\_20  
GCGGAATCAACAACGCTCATACCGGCTGTACCAGGG  
>DCMB5\_CP004079\_I-C\_spacer\_21  
CTGGTGGAAAGGGCGAAGTAGTATACGAGGAGG  
>DCMB5\_CP004079\_I-C\_spacer\_22  
TCTTCATGCCTTGAGTGCCCTTTTGAGGCTTGC  
>DCMB5\_CP004079\_I-C\_spacer\_23  
TATAGATATAACATTAGGTATTATTATGATTTG  
>DCMB5\_CP004079\_I-C\_spacer\_24  
TTATGACCCTTTGCCACAAATATGTACTCCT  
>DCMB5\_CP004079\_I-C\_spacer\_25  
TTGCTCTGGGATTTGCCCTCAACTGGAAGTGGCA  
>DCMB5\_CP004079\_I-C\_spacer\_26  
GATAGTCAAATAATGCGTCTAGCCCATCGTAGCA  
>DCMB5\_CP004079\_I-C\_spacer\_27  
CCACCAGTTATATCAGTTGGTCAATATCGGGTGT  
>DCMB5\_CP004079\_I-C\_spacer\_28  
AACAGCATCCCACCACAAGTATTTCCCTATCGGAGG  
>DCMB5\_CP004079\_I-C\_spacer\_29  
TGGCTCATCTACGGGATATAACATATGGGTTTT  
>DCMB5\_CP004079\_I-C\_spacer\_30  
GTGTCCCACAATCCGCAAAGCACTTGAGCTATACG  
>DCMB5\_CP004079\_I-C\_spacer\_31  
CTGCAACCCACGCGGAGCTGGGCAATGGAAAGAG  
>DCMB5\_CP004079\_I-C\_spacer\_32  
ACCGTGACTGTATTGATAGGGGCATTTCAGTTTTTT  
>DCMB5\_CP004079\_I-C\_spacer\_33  
ACTAGCTTATCTTCTTCATCATCGTATTTATTATCG  
>DCMB5\_CP004079\_I-C\_spacer\_34  
TTATGAGATATACTATATGGTTTTCCGCTGTAAAC  
>DCMB5\_CP004079\_I-C\_spacer\_35  
CTATTTGTTCTTTAGCAATACCTGTAACCTCAAT  
>DCMB5\_CP004079\_I-C\_spacer\_36  
ATCGCCTATAATAATTAACCTCTTAATACAAT  
>DCMB5\_CP004079\_I-C\_spacer\_37  
CTTCTATACTCCTATTGCCTGTTGTGCTCTCTGGT  
>DCMB5\_CP004079\_I-C\_spacer\_38  
TGGTAAGACTGCTCATTCCATGCCCCCTAATGTA  
>DCMB5\_CP004079\_I-C\_spacer\_39  
GAAGTGCCTGCAATGCAGTAAAGAGTATAGCAAC  
>DCMB5\_CP004079\_I-C\_spacer\_40

CAGCACATATGCCTGTTATCGGCTATGCGGGG  
>DCMB5\_CP004079\_I-C\_spacer\_41  
TAAATGCTAAGAGGCAGGCAGAATATAATCTGA  
>DCMB5\_CP004079\_I-C\_spacer\_42  
GCAGTGTTAACTGCTGTTATTACCGTAGGAGT  
>DCMB5\_CP004079\_I-C\_spacer\_43  
GTAGAGATTGACCTTGCCATTACACTCGGTC  
>DCMB5\_CP004079\_I-C\_spacer\_44  
GCGGATAGCTCCGCCTTTTAGCATAATTACCTAAC  
>DCMB5\_CP004079\_I-C\_spacer\_45  
CTACTAACATTTATTATAACCTCCACCATTAGTTA  
>DCMB5\_CP004079\_I-C\_spacer\_46  
GGCAATATCTCCTTTAACCCTGCGGAGTATTTGGCA  
>DCMB5\_CP004079\_I-C\_spacer\_47  
CTGTTCAGGTACGAGGTAGAGACCGGTAGTGTCCCT  
>DCMB5\_CP004079\_I-C\_spacer\_48  
AATCTATCTGAGGCAATTCATCTATTAGTAGCTT  
>DCMB5\_CP004079\_I-C\_spacer\_49  
ATTATCCCTATACCCATCTTCATAGATACTTTTAG  
>DCMB5\_CP004079\_I-C\_spacer\_50  
GCCAGTCATTTAGTTCTAGCCTGTCCTGCCATTTCTT  
>DCMB5\_CP004079\_I-C\_spacer\_51  
TAAGTACCTATTAGGTGTGCAGTATCGGGCGT  
>DCMB5\_CP004079\_I-C\_spacer\_52  
GGCTATTGTTATGCCTCCCAAATATAAAA  
>DCMB5\_CP004079\_I-C\_spacer\_53  
CTATACTCGTATGCACACTATTAATAGCCCTCGCT  
>DCMB5\_CP004079\_I-C\_spacer\_54  
AGTATACCCAAAGCTAAATAATGCTAGAGTTGTTTA  
>GT\_CP001924\_spacer\_37  
CCCCTCCGTTCCCTTTATTAGAGATATTTAAC  
>GT\_CP001924\_spacer\_36  
CCTAACCGACAATTAGCACATAACTCGCCCTG  
>GT\_CP001924\_spacer\_35  
ATAATGGACGCTGTGGAAGTGTAGAGATGCA  
>GT\_CP001924\_spacer\_34  
ACTGCCGCAAATAGTGCCACATGGCGCCTAT  
>GT\_CP001924\_spacer\_33  
TGGGGCTAAGATGCACGAATACATAGTCAACTA  
>GT\_CP001924\_spacer\_32  
ATCGCTAGGGCTTGCCGAAGTATTTACTC  
>GT\_CP001924\_spacer\_31  
CACGCAGTAATATAATATTCATTCACATAAGG  
>GT\_CP001924\_spacer\_30  
GGTTGGGGAGAATACTGTAAGGCTTCCGAGGA  
>GT\_CP001924\_spacer\_29  
ACCAGCTAGTGAATTAATACTACTAATAATGCGAC  
>GT\_CP001924\_spacer\_28  
CAATAGGAAAAGTCTTGTCAATTCCTTCCAG  
>GT\_CP001924\_spacer\_27  
ACCTTCAATTCAGAAGCTAGTTTGGGAGAGA

>GT\_CP001924\_spacer\_26  
ACTCTCTGGCTAGTTGTTCTATGATTGCATCA  
>GT\_CP001924\_spacer\_25  
TTTGTTCTTTGAAATATGCCGCATCGCTAGGG  
>GT\_CP001924\_spacer\_24  
CTAGGAGTCAAGCATCGAGTAGCCAAAGAGGC  
>GT\_CP001924\_spacer\_23  
AGACAGATGTGCGTATAAACGGGTGGTCATCT  
>GT\_CP001924\_spacer\_22  
TTCCACCAGAACGAAGCGTTTTTCATAACCAC  
>GT\_CP001924\_spacer\_21  
TTTAGTCTTTTCGCTACCCATCCTGTAGTTCC  
>GT\_CP001924\_spacer\_20  
GTCTCTGGACATATCACCGCTGGCCTTGATTT  
>GT\_CP001924\_spacer\_19  
GCAGTAGAGGATATCCCGTCTTGGCCCGCGTT  
>GT\_CP001924\_spacer\_18  
GTGCATCTATTGCGTACCGCCAGTACAGGTGC  
>GT\_CP001924\_spacer\_17  
CCTGGTGAAACTGAAGAAGACAAGGAACTGACA  
>GT\_CP001924\_spacer\_16  
GTACGGTCTGGGCCGTATAGGCAGGATTGAGGG  
>GT\_CP001924\_spacer\_15  
TCCTGAACGCTCATAATGGCATCTGAAGAGAC  
>GT\_CP001924\_spacer\_14  
GTATCCCCTATATATTGCCACAAAATAGCTA  
>GT\_CP001924\_spacer\_13  
TACTGGCTATGGTGCATGGAAACAGATGAATT  
>GT\_CP001924\_spacer\_12  
GGGTCTACAGCGTGAAAATGGTCTAAACGCCA  
>GT\_CP001924\_spacer\_11  
TTATAGTTGTGTATGATGAGCCAGAATTAGTA  
>GT\_CP001924\_spacer\_10  
AACTTGGTAACCGGCTTTGATAACCATGCTAA  
>GT\_CP001924\_spacer\_9  
ACCAATGGTTAGAGGTGCACCCTTTTTGTAGC  
>GT\_CP001924\_spacer\_8  
TTCTCCCGCACAAGGCACATACCCCGTTGCTC  
>GT\_CP001924\_spacer\_7  
TATCATATGGCACTAGGGGGTGTTCAGATC  
>GT\_CP001924\_spacer\_6  
CCCCTCAATACAGTACGACTCGCAATTAGTAC  
>GT\_CP001924\_spacer\_5  
GCGTCCATCATATGGCTGTACTGGTGGGTGGT  
>GT\_CP001924\_spacer\_4  
TTCAGCTGCTTTTCGGGCTTGCCACCTTGTC  
>GT\_CP001924\_spacer\_3  
CATTCTTTTACTGATTTTTATCTCGGCTGT  
>GT\_CP001924\_spacer\_2  
TAGCTAGTGAGTTGACTACTAATAATGCCACT  
>GT\_CP001924\_spacer\_1

GTTTGACGTCTTTGAGTTGTCTGGCATATTG  
>KBVC1\_CP019968\_spacer\_41  
AGGCTACACGGGCATTTTCATCCGAAAGCTAAAG  
>KBVC1\_CP019968\_spacer\_40  
CCCCTCCGTTCCCTTTATTAGAGATATTTAAC  
>KBVC1\_CP019968\_spacer\_39  
CCTAACCGACAATTAGCACATAACTCGCCCTG  
>KBVC1\_CP019968\_spacer\_38  
ATAATGGACGCTGTGGAAGTGTAGAGATGCA  
>KBVC1\_CP019968\_spacer\_37  
ACTGCCGCAAATAGTGCCACATGGCGCCTAT  
>KBVC1\_CP019968\_spacer\_36  
TGGGGCTAAGATGCACGAATACATAGTCAACTA  
>KBVC1\_CP019968\_spacer\_35  
ATCGCTAGGGCTTGCCGAAGTAAAGTATTTACTC  
>KBVC1\_CP019968\_spacer\_34  
CACGCAGTAATATAATATTCATTCACATAAGG  
>KBVC1\_CP019968\_spacer\_33  
GGTTGGGGAGAATACTGTAAGGCTTCCGAGGA  
>KBVC1\_CP019968\_spacer\_32  
ACCAGCTAGTGAATTAATACTAATAATGCGAC  
>KBVC1\_CP019968\_spacer\_31  
CAATAGGAAAAGTCTTGTCAATTCCCTTCCAG  
>KBVC1\_CP019968\_spacer\_30  
ACCTTCAATTTTCAGAAGCTAGTTTGGGAGAGA  
>KBVC1\_CP019968\_spacer\_29  
ACTCTCTGGCTAGTTGTTCTATGATTGCATCA  
>KBVC1\_CP019968\_spacer\_28  
TTTGTTCTTTGAAATATGCCGCATCGCTAGGG  
>KBVC1\_CP019968\_spacer\_27  
CTAGGAGTCAAGCATCGAGTAGCCAAAGAGGC  
>KBVC1\_CP019968\_spacer\_26  
AGACAGATGTGCGTATAAACGGGTGGTCATCT  
>KBVC1\_CP019968\_spacer\_25  
TTCCACCAGAACGAAGCGTTTTTCATAACCAC  
>KBVC1\_CP019968\_spacer\_24  
TTTAGTCTTTTCGCTACCCATCCTGTAGTTCC  
>KBVC1\_CP019968\_spacer\_23  
GTCTCTGGACATATCACCGCTGGCCTTGATTT  
>KBVC1\_CP019968\_spacer\_22  
GCAGTAGAGGATATCCCGTCTTGGCCCGCGTT  
>KBVC1\_CP019968\_spacer\_21  
GTGCATCTATTGCGTACCGCCAGTACAGGTGC  
>KBVC1\_CP019968\_spacer\_20  
GGGAGCCACATTTAGGACAGTTCATGGCTATC  
>KBVC1\_CP019968\_spacer\_19  
CCTGGTGAAACTGAAGAAGACAAGGAACTGACA  
>KBVC1\_CP019968\_spacer\_18  
GTACGGTCTGGGCCGTATAGGCAGGATTGAGGG  
>KBVC1\_CP019968\_spacer\_17  
TCCTGAACGCTCATAATGGCATCTGAAGAGAC

>KBVC1\_CP019968\_spacer\_16  
GTATCCCCTATATATTGCCACAAAAATAGCTA  
>KBVC1\_CP019968\_spacer\_15  
TACTGGCTATGGTGCATGGAAACAGATGAATT  
>KBVC1\_CP019968\_spacer\_14  
GGGTCTACAGCGTGAAAATGGTCTAAACGCCA  
>KBVC1\_CP019968\_spacer\_13  
TTATAGTTGTGTATGATGAGCCAGAATTAGTA  
>KBVC1\_CP019968\_spacer\_12  
AACTTGGTAACCGGCTTTGATAACCATGCTAA  
>KBVC1\_CP019968\_spacer\_11  
ACCAATGGTTAGAGGTGCACCCTTTTTGTAGC  
>KBVC1\_CP019968\_spacer\_10  
TTCTCCCGCACAAGGCACATACCCCGTTGCTC  
>KBVC1\_CP019968\_spacer\_8  
TATCATATGGCACTAGGGGGTGTTCGAGATC  
>KBVC1\_CP019968\_spacer\_8  
CCCCTCAATACAGTACGACTCGCAATTAGTAC  
>KBVC1\_CP019968\_spacer\_7  
GCGTCCATCATATGGCTGTACTGGTGGGTGGT  
>KBVC1\_CP019968\_spacer\_6  
TTCAGCTGCTTTTTTCGGGCTTGTCCACCTTGTC  
>KBVC1\_CP019968\_spacer\_5  
CATTCTTTTTGACTGATTTTTATCTCGGCTGT  
>KBVC1\_CP019968\_spacer\_4  
TAGCTAGTGAGTTGACTACTAATAATGCCACT  
>KBVC1\_CP019968\_spacer\_3  
GTTTGACGTCTTTGAGTTGTCTGGCATATTG  
>KBVC1\_CP019968\_spacer\_2  
GGCTCGCATTGAAGCCAGAACGGCCAGCTTGC  
>KBVC1\_CP019968\_spacer\_1  
TCTTTGATAGCGGTCAAGTCACCACGCCCCAT  
>DCMB5\_CP004079\_I-E\_spacer\_28  
GCCACCCTCAATATGCGGATAGCCCCCTGTAC  
>DCMB5\_CP004079\_I-E\_spacer\_27  
CCCATCTGTAGTATCCCCTGTATTACCCGCCTG  
>DCMB5\_CP004079\_I-E\_spacer\_26  
GTATACCGCTACGTGGAAAGAAAAACGGCTCAT  
>DCMB5\_CP004079\_I-E\_spacer\_25  
GATAAGCCGGGCACGTAATTCAGAAGAAGATGG  
>DCMB5\_CP004079\_I-E\_spacer\_24  
AGCTGGTAAATGTCATATTGTGGCAACTTGTAC  
>DCMB5\_CP004079\_I-E\_spacer\_23  
GTTGCTTTTTAACCACAACGCCAATGAGCCAAT  
>DCMB5\_CP004079\_I-E\_spacer\_22  
GTCCTGCCCTGAAAAGTAAGGGTTAGGGTTGGCC  
>DCMB5\_CP004079\_I-E\_spacer\_21  
TTCTAATGGGGAGTTCAAACGTATAGAAGCTACC  
>DCMB5\_CP004079\_I-E\_spacer\_20  
GTGTCAGTTCCTTGTCTTCTTCAGTTTCACCAGG  
>DCMB5\_CP004079\_I-E\_spacer\_19

GGCACCTGTACTGGCGGTACGCAATAGATGCAC  
>DCMB5\_CP004079\_I-E\_spacer\_18  
GAACGCGGGCCAAGACGGGATATCCTCTACTGC  
>DCMB5\_CP004079\_I-E\_spacer\_17  
GAAATCAAGGCCAGCGGTGATATGTCCAGAGAC  
>DCMB5\_CP004079\_I-E\_spacer\_16  
TGGAACTACAGGATGGGTAGCGAAAAGACTAAA  
>DCMB5\_CP004079\_I-E\_spacer\_15  
GGTGGTTATGAAAAACGCTTCGTTCTGGTGGAA  
>DCMB5\_CP004079\_I-E\_spacer\_14  
GAGATGACCACCCGTTTATACGCACATCTGTCT  
>DCMB5\_CP004079\_I-E\_spacer\_13  
GGCCTCTTTGGCTACTCGATGCTTGACTCCTAG  
>DCMB5\_CP004079\_I-E\_spacer\_12  
GCCCTAGCGATGCGGCATATTTCAAAGAACAAA  
>DCMB5\_CP004079\_I-E\_spacer\_11  
GTGATGCAATCATAGAACAAGTCCAGAGAGT  
>DCMB5\_CP004079\_I-E\_spacer\_10  
GTCCGGCTGGACAGCTGAAAAGTGGTGGTACG  
>DCMB5\_CP004079\_I-E\_spacer\_9  
GATATGTGCAGTATCGTTTGACCACTGTAGCAC  
>DCMB5\_CP004079\_I-E\_spacer\_8  
GGGCTAATATTACTTCAGACCCGATACCCAGAG  
>DCMB5\_CP004079\_I-E\_spacer\_7  
GATAATTACTCTGGTGTATCAACTTATGCTGAT  
>DCMB5\_CP004079\_I-E\_spacer\_6  
GGTAGGTGAGCCAATCGGTCCTGGTACTGTCCC  
>DCMB5\_CP004079\_I-E\_spacer\_5  
GCCGGCATCGGTCTTTTTCCAACCTAGTTCCGA  
>DCMB5\_CP004079\_I-E\_spacer\_4  
GTAACCTCCGCCGCCGCCACCGCCTTCTCC  
>DCMB5\_CP004079\_I-E\_spacer\_3  
GCAGTCATGGCAAATGTAATCCCTCGGTGTAA  
>DCMB5\_CP004079\_I-E\_spacer\_2  
GTCATTAAGGCAAATTAGAGGCCTTACTCAAGG  
>DCMB5\_CP004079\_I-E\_spacer\_1  
GTAGCAGATAGAATACATATGCATGCTACTAGA  
>CBDB1\_AJ965256\_spacer\_19  
CATTTCTCCATCAGCTATAGCACCCACTCTTGC  
>CBDB1\_AJ965256\_spacer\_18  
AATCCAAGTGCCCTCAAATATCAGGCACATTAC  
>CBDB1\_AJ965256\_spacer\_17  
TCCAGCTTGTTTGACTGCTGTGCCAACTGCATC  
>CBDB1\_AJ965256\_spacer\_16  
ACATATCAACCCTTTCATGCTCATAATTTTCCC  
>CBDB1\_AJ965256\_spacer\_15  
CAAATTATGACTAGAATACCTAGTGTAGACAAC  
>CBDB1\_AJ965256\_spacer\_14  
AACTTGGTAACCGGCTTTGATAACCATGCTAAC  
>CBDB1\_AJ965256\_spacer\_13  
ACCAATGGTTAGAGGTGCACCCTTTTTGTAGCC



>CBDB1\_AJ965256\_spacer\_12  
GGGAAGCTGGCTCCTTTTAAAGTGCCTGCGGCTTC  
>CBDB1\_AJ965256\_spacer\_11  
GCAAACCCATTAGGGGGTAAGGGGGTATATATAC  
>CBDB1\_AJ965256\_spacer\_10  
ATCAAAGGACTTGGACTACTACATGGAGTTACC  
>CBDB1\_AJ965256\_spacer\_9  
TCTGGGGCAGGTCAGGCCCGCTGGCATGGATAC  
>CBDB1\_AJ965256\_spacer\_8  
AAGGGCATATAACTCCTGTTCCAGCCTTCAAAC  
>CBDB1\_AJ965256\_spacer\_7  
TTCTGCTATGTATTCTCTTTTAGCCCTGGTAGC  
>CBDB1\_AJ965256\_spacer\_6  
GTATTCAAGCTGTATCCGCTTGGAGATACCCAC  
>CBDB1\_AJ965256\_spacer\_5  
ACCGAAACATTGAGTCGCCTCTTTATACCAATC  
>CBDB1\_AJ965256\_spacer\_4  
CTGTCTATTTCTGAATTAGCATAACTACTGAAC  
>CBDB1\_AJ965256\_spacer\_3  
GGCAACCCTGTAATGCCTGTTAATCTCTGTAAAT  
>CBDB1\_AJ965256\_spacer\_2  
ATATGTTTTTCAGTATCCCAGAAGTCACGTACC  
>CBDB1\_AJ965256\_spacer\_1  
CCTAAAATAACAAAGCTGACCTTAAAACAGGTCA
