# Supplementary material
Source: PubMed Central journal article supplement (PMC6299113)
Supplement: 41396_2018_254_MOESM4_ESM.pdf [file 41396_2018_254_MOESM4_ESM.pdf]

>pg11a5

TTAAGCAATAAGTTTTGTATAATCGTTGAACTTCTGCTGCGGTTTCAGGAATGGATGCCCCGTC  
AGCCAATTGGGATTCAATCCACATTCTCTTGTGGATAGCCAGACTTTCAAGGGCTTCTTCTGG  
AGTGTCTCCATCGCCTATGCAACCTGTTAATTCTAAGGCTCTGGCAACATAGTAAGTCCCGC  
CGTCATTATCTTCGTCTGGTTCAATGACTACTGTATATGGCAATCCCATGTAGTAGTCCAAGT  
TCTTTGAGATTGTTTCCATAAATTAAGCCTTACGCTCAGACAGTTTATGCACCATGTACGTAT  
TCAGGCTGACGTTATTCTGCTCAGCTGCCCTGTCAAGTTTGGCATGAAGCTCTTTGGGCATAC  
GCACCACAAACCGCCCCGCTATACTCCCGCTCGGTTCTGGGAAGCGGAATATCCTGCCCATCT  
TCATAAGCGGTTTCTATCCAGAGTTGACGGGCCTCCTGAATATTGGCAAGTGCTTCTTCTGAA  
GTATCACCCCTCAGAGAGACAACCAGGAAGTTCTTCAATTTCAACTACATACCCGCCCACTTT  
TGAGGGAATAAGTTTAATTGGGTATTCCAGACCAAGGTAATATTCTAGTGGTTGACGTCTAG  
TTTTAATAGCATTGGCATTCTTAACCTCTATCCAAGCTGGGGATTATCCCCCAGCTTTAG  
CATCTTTGTCATTTCGTTCTACGTATTACAGGTCTAACATACTTTGATGACTTAGGGCTTATTATC  
GTGATTGGCATTGAATTTGCTTTGTGATAAACCTTGTGACTTCCTGCTGACCTTCTCAGTTTCG  
TAGCCAGAAGCGATAAGAAGTTTATCACAATCAGCTTCAGTTACTTTGTTTGGGTTAGCCTTT  
ATCTGGTTTATCAGTTTCTCTATACTCATCGCTCAGTCCTAATTTATTATACTTAGATGATACT  
ATATTTAGTATCATTTGTCAATACCCTAAGCAAGATATTTTTAGTTTTAATTTTGTCCATTATT  
TAGCCAACTGGCATATGAGGTTAATGCTCTATCATGTATAACCAGAGCTATAGAGTACATGCT  
CTCCAACATAAAGCACGTCAAGCGTGGAAAGAGTTATGTAATCCACGCTGTTACTCGGCTG  
CCAATAACTCTCTAGCTATCGCAATGCTAGGTGTCCCTACTGATGACCGAGGTATTGCCCTTA  
ATAATCTCAGGGAGATAATAGCGGATTACGAGAGAGCTGCGAGGGTGCCTAGCTGATTGGA  
TTGACGCCCATGCATTCATAGCATCGGCTTAGCCGTACCGACCTATCCCCATGAAAGGAACC  
GAATAAGCAATGCCCTATAAACTCCCCACATATGCGCAAAGCCCCGGATGCTCAGAACTCAC  
CTTAAACAGGTACTGCCAAAAGCATGAATATCTTCCGTTTCCCAAGATGAAAGGGACAAAC  
GCATTGAATATGACAGGGGGAGGGGTAGCGCATCAAGCAGGGGGTATGATTCCAGATGGCG  
AGGGGTACGTCTCACAAAATTAACAAGACCCCTATGTGAAGATTGCAGGGGTATAGGC  
TTAACAGTCCCTGCCACAGATGTAGACCACATAGACGGGCATGTCCGCAATTTATCACCAGA  
TAACCTGCGCTCACTATGCCATGCATGTCATAGCCGTAAGACCATAAGGGAAAATGGCGGGT  
TTGGGAAAAGAAAAGCTTTAGAATTCTCCGCCAGTGGCTGGGGGAAGGGGGATGAAATC  
CTTGGGGCTTTTTGCATGGAAACCGCAGGCCGAACCTCCGTGTAATTTTCGGGAAATTAGA  
AACTTTTAGGTGAAGAGACCATGACAACCAGGGGAAGAAAACCAAAACCAACCAGAATTCA  
TGAGTTAAATGGGAACCTTACGCTTAAATCTTGAAGCACGCAAAGCAAAGAAATTCTCA  
CACCTCAATTGCTCCGACTTGCCCATCATGGTTGGATGCTGAAGCAAAAAAAGAATGGAAA  
CGTATTGTTCCCTGAGCTGACGAACTGGGGATTATTTTCGAGATTGACCGGGTTGCATTGAC  
CGGTTACTGTGCTGTTTATAGCCGATGGCGTAAGGCCGAGGAGGAAATCAGTAAAGGATTTA  
CATACCTTTATGAGGATTTCAAACATTAGCAATGAAGCGTGCTGTAAAGCCTGAGGTCAGA  
ATTGCAAAGATGCATTAGCGCAGATTAAGCATTCTGTGTGCAATTTGGTTGACTCCTTCT  
TCACGTTACGCATGAGTGTACCCGGTGCTTCAGATGAGCCTGTTGATGAGATGGAAAAAGC  
ATTAGAGGAGGCTAACGCGAGAGCAAAGAAAGTCTTACCGAATTGAGGTAATTTCTCATGG  
CCAACAAAGACCGCTGGTTCAATAAAGACTAAACCGCCAAAGGCTCGCCTAAGGGCGT  
TTTCTTTAGCCAAGAGTATGCCGACCACGCAGTCAGATTCATTACGGCTCTTAAACATACAA  
AGGGTAAATGGGCCGGACAGCCATTCGTACTCTTCCATGGCAACGTAAGATTATTGAGGAA  
GTCTTCGGATGGCGCAAGGCTAACGGCACCCGACTATATAAGACTGTATACGTTGAGATACC  
CAAGAAAACGGCAAGTCGGAATTGGCTGCCGCTGTCGCTTTATACCTGCTATTTGCTGATG  
GTGAGCATGGGGCTGAAGTATATGGCGCTGCTGTAGACCGCGACCAAGCACGCATCGTATTT  
GATGTAGCAGCTGATATGGTTTGTATGTCACCTGCCCTTCTTAAGCGAAGCAATATATTAGA

CAGTGTCAAACGTGTTGTAGTTTCCAGCACCAACTCATTTTACCGGGTACTGAGTAAAGAGG  
TTAAAGCTAAGCATGGCTTCAATACTTCAGGTCTGGTGCTTGACGAATTACACGCACAGCCT  
GACAGAGACCTTGTAGATGTGCTTACTAAAGGTGCAGGTGCGGCCCGTGAGCAGCCTCTCTT  
TTTCATGATAACCACAGCAGGCGTAGACAGGGAAAGTATCTGCCGCGAGTATCACGATAAA  
GCCCCGATATTCTTGATGGCAAACGTGAAGAACCCACTTTCTACCCTGTCATATATGGCCC  
GCCTGAGGATACCAAGGGATGGGATTGGGAAGACGAAAACAACCTGGTATGACGTTAATCCT  
TCCCTCGGTGAGGTGTTGTCCATTGATGAGATGCGCGAAGCATATCAATCTGCTAAAGGCAA  
TCCGGCCGAGGAAAACGTATTCAAGCAGCTACGTCTCAATATGTGGATTAGCTGCTTCGTAA  
AGGGTATGCCGATGGAGAATTGGGATAAATGCGGGCCGTCTAAATTTGAACTTGAAAAATA  
CGAGCAGTGGTGTGCTGAGATGGAAGGTCAGGAATGTTATGCCGCCCTGGACTTATCATCTA  
CCACCGACCTTACATCACTCAACCTAGTATTTCCGTTAGAAGATGGTTATTACCGAACAATC  
CCGTTCTTTTGGCTGCCATTAGATAACCTTGAAATGGCTGCCCGCCGTGACCGAATACCATAT  
CCGATTTGGGCGGCTCAAAGCTGGTTCGGCCAACTCCGGGAAATGTAGTGGACTACAGTGC  
GGTCAAGGTGACATTAAGCGAATTGGCTCTGAAATACCGGATACGCGAAATAGCCTTTGACC  
CTTGGAATGCCATGCATCTGGTTACTGAGTTATCAGATGAGGGATATCCGCTAGTTGAGTTC  
AAACAGTCTGTCCAGAACATGTCACCGCCAACCAAAGAGCTACTGCGAGTTGTCCTGAATGG  
AAAGTTACAGCACGGCGGTAACCCGGTTCTCAGGTGGAATGCGGATAATCTCCAGCTGTATT  
GGGATGCCAATGACAACGTCAAACCTAACAAACAAAAGGCCACCGGCCGTATTGATGGCGT  
AGTGGCCTTAATTATGGCACTGAGCCGGGCTATCTCACATAGCAATGAGACTGAACCCCTCCG  
TATATGAAAGCCGGGGCGTATTAACCCTGTGAACGGGAGTGATAAATGAATCCGATAAAAG  
CATTCTTAAAAAGTTTCGTTATTAATCTACAGCCTGGAGAAAGAAGCATATTCTCTTCTGAA  
AGTCTGACAGGTGTTTATGTAAATGAGGAAACGGCTCTTAACAATGTTACTGTATACGCCTG  
TATCAGGCTCCTGTCCGAAACATTAGCATCCTTACCCTTGATTGTATACAAACGCAATGGCA  
AAGGTAAAATCAGGGCAACAGAACATCCCCTGTACACCCTTTTGCATAATCAGCCTAATCCT  
GAAATGAACTCTTTGACCCTGCGCGAAACCCTTATGAGCCATCTTCTGACGTGGGGTAATGC  
CTATGCGCAGATAGACTGGGAGGATTACACACACATAAAAGCTTTGTGGCCATTATTCCCAA  
ATAGAATTAGAAAAACCAGAGACCCTCAAACCTAAACAAATTGTCTATCATTATCCCCGTCT  
GATGGCGGCAGGCCCGTTGATTTGCCTGCTTGGAGAGTATTGCATATCCCCGGTTTAGGGTT  
TGATGGGTTATTGGGTTATGCACCTATTACAATGGCCCGTAACACAATAGGTCTGGCACAAG  
CGACAGAGGAATTTGGCAGTAAATCTTTAAAAATGGTATCAACCCTTCAGGCATACTGGAA  
CACCCGTCCAAAATGAGTGATACCGCTTACAAGAACCTCAAGGAATCGTTCACGAATCAGTA  
TGCCGGACTAGGTAATTCAAACAAGCCTATCATCCTTGAAGAGGGCGCGAAATTCAAACAAA  
ATCTCTGTCTCGCCTGAAGACGCACAGTTTTTLAGAACTCGTAAATTCCAGCGGTCAGAGAT  
TGCCAGTTTCTTTCACGTGCCCCCTCATATGATAGGAGACTTAGAGCGGTCTACCAATAACA  
ACATAGAACAACAGTCATTGGAATTCGTCATCTACCCATGCGCCCATGGCTCGTGCGCTGG  
GAACAAGCGATAAATACCCAATTATTGACTGAAGATGAACGCTCTGATTATTTGCGCGAGTT  
TTTGGTGGAAGGATTACTCCGAGGCTCTCCCGTTACGCGTGCCGGTTTCTATAAGGAAGTGT  
TTATCTAGGTGCTCTATCCCCAATGATATCCGGGAAAAAAGAAAATCTTGACCCTATTAATG  
ACCCAGGTGGCGACAAATATTACGTGCAAGCAAATATGGTTCCAATGGATATGGTTCGGAAA  
AACGCCGGCTGTTAATCCTGCAAATAAGTAAAGGAGTATAGGTATGGATAAAGTTACTGCTG  
AGACCCAGCACAAAGTCATTTGTTGGGCTTGACCTTAAATCAGACAGCCCTGGTACTTTTACA  
GCCCCGATCGCCACATTAAACGTCAATTGACAAAGACGGAGATGTGACCTTGCTGGTGCTTT  
TCCGAATGGGAAAAACATTCTGATATCAGCTTATATGCACTCTATCTGGGCCGATTCAATTAC  
CAGTGGGAAAGGGCGTCATCCGAGAAGAAAAAACGAGGTATTCGTAGATGGTACGTTTTTA  
CTTAAACACCACTGCCGGTAAAGAACATTACGAGACCATCAAAAATGCCCCGAACTGCAG  
GAGTGGTCAATATGGGTTTCAGAGTGCTGGAAGTGGCCGAAAATACCCCGTGGAAATGATAACC  
CTAAAGTCTGGCGAGTGCTTAAAAAGATGGATGTCTTTGAAGCGTCTCCTGTGTTGCGAGGT

GCTGGTGTAAACACTGGTACTTTATCTATCAAGTCTGAGGAAGGCATAACTTTCACTGGTCA  
ATCTGAGGCAGTGCTTGCTGCTGTCAAAGATTTAACTACCCGTGTTAAATCGCTTGCTGATTT  
GAGACGGAAAGAAGGACGCAAATTATCACCTGCTTTCAGGGAAAAGCTAGAGGAACAAATC  
AAAATAACTGAAATGACCGAAGAGCTTAAATCCTTGTTAGCTACCCCGCAACAGCCGG  
ATAAGGCCATAATCGCAAGCCTATACCTGCGCTGTCAAAAAACATTAAAAAAACTGGAGGA  
AATCTAAATGAAAACCATTACCGAAATCAAGGGCGAAATCAAAGCCAAATCCGACCTTATA  
CATAAGGTATTTGCTGAGGCTGGTGACAATCTGGACTTTGACAAGGTTACTTGTCTGCAGGG  
CAAGACCACCGAAGAAAAGGTTGCCGAAATGAATGTTCTGGACAAACAACCTCGCAGAACTG  
AATACCGATTATCAGAAGGTTTCTAAATTGACCGAACTGCGCAAATCCGCAGATGAAGGCGT  
GAAGTTGGCCAGTGAAGAACCCTCAGAAACCTAACCTGCAGGTTAGCAAGAAAACAATTGGC  
GAGTTGATTATGGCCTCAACTTTCCGCAAAGGCAAGGTGAGTCTGGATATTTCTCCCGCTGA  
AGCATTGTCCTTAAAGCCGACTTCTTACCAGCTCTGGTTGGGCTCCTCCACTTTTCGCCA  
GCCCCGTTATGTGGAATCTCCACCCGCCCTCTGGTCTTCTGGATTATATGCCGGTTTATCC  
GACCAACCAGAATGCTGTCTCCTATATGTTGGAGACCACATTTACCAACTCCGCAGCTGAAA  
AATCTGAAGGTGGCGCTGCAGCTGAATCTGCTCTGGCACTCACTGAAACCACACAGGCTGCT  
CAGGAAATTGCAACCTTTGTGCCTGTTTCCAAGGTTCAACTGGAAGATGTCGCTCTGGCTGA  
AGCCTATCTGACCAATAGACTGGCCTTCATGGTGGCCAGAACTGGAAAAACAGTGTCTAG  
AAGGTTCAGGAAGTACCCCGTTCTGCTCGGCACTCTGCACTTGGGTAGTATCCAGTCACAG  
GCTAAAGGCTCTGACCCCACTCCTGATGCTATCTACAAAGCCTTTAACCTGATTTCGCGTCAAT  
GGCTTCACCGAACCTCTGTACTGTTTATCAATCCGACAGATTGGGAGGCTATACGCCTGCT  
CAGAACTTCTGATGGCGTATACATTTTCGGTAGCCCAATGACTCTGGAATTAACCGCATCT  
GGGGTGTACCGGTAGTTCAGACCACTGCTGTAACCGCCAATACTGCCATTACTGGCGATTAT  
GCCAACTTTGCCTATCTGGCTGAACGCAAAGGGGTTGAGGTTGAAATGTCCAGCGGTTATTC  
CGACTACTTTGTAAAGGCAAGCTGGCCGTTCTGGCTTCAATGCGAGCCGCTATGGTTCACA  
CCAGAATACTGCCTTTGCCACGATAACCGGAATATAAGGAGAGCCAGTTAGAGAGGGGGT  
TGAAATCATATCCCCCTCTCTAACTGGCGAAAGGAAGAAAACATGAAAAAGTTAAATCGA  
ATGCTCATGCTTATGTTGCGGGTTTTCTGCATGACAATATTCATGTGCCCGCCTGACAGCGGT  
GAGTCGGCATATATCATAGAAGGTTACCGCAAACGGGCATGGCGAAATGCCGGTGCCCTT  
CAGATGGCACCAGTGGTACTTATGCAGGCATAGCCGATAAAGGCGACCTGTTGATTGATACC  
ACCAATGGCACCTCTATCAGAATACAAATACTAAGGCTTCGCCACATGGACACAGAAATC  
GTCTCTGGCTACATATGGGCTGGTCGGTGATATGGCTGCCAATGGAACGGCTGTCGCCAATG  
CTGTCCGTACTTCTTCAGCTCCGGCAAGAGTCGACCATGTCCACAAAGTCCGGTGAACATGAC  
CATTCTGACAATACTAAGGGTTCACCAGTTGTAGAAGCCGGCATTACCCAGCCTCTTTGAC  
TGGTCTGGTAGCCAAGCAGGTAGCAGACGTCAATGTTATTGGTGGGCTGGTGGTATTACACC  
GGATAGACGTGGCCGATGCTTCAGGTGATAACGATGTGACACTGACTCATAAACTAGAGT  
GATTGATGTCTGGGGTCTGAACACCGGTATTGCTGCCCATGCTACTGATGACACGTGGCAGG  
TCAAAAATGGCTCAAATGCCATTTAGACGCGGTTGCTAAAACGGCTGCGGTCAATGCTATC  
AAGCGTATTGGTACTATTGACCCGACTTATGCCGAAATTGCCGCCGGTGGTACCCTGCGTAT  
TACAGCGGTAAAGGACACTAACGCCGCTGTTACTGTCTATGTTTTGGGAATCAGAGTGTTCAT  
AAAAGGGGAGAGAATGCTTTGCAAGTGCAAATATTTTAACTATGTGAATGGTCAGCTGGTTT  
GCTCCGTTTGTGGGCGGCCAGCTGGCGCCCCCAAATTGAGGACAAAATAGGTACAGACCAT  
GAAAGTAAAACCGAAGTAATCTCTCCAAGAGAGGTAACCAATATGGCAATAAAAATCATA  
ACCCCGCCTGCGTCCGAACCAGTAAGCCTCTCAGAGGCAAACTGCATCTACGGGTTGATAC  
GTCTGCTGATGATACCTATATATCAAATCTGATAACAGCGGCAAGGCAATATCTGGAAAGTG  
TCGCTCTTCAAAAAACACTTGGTACACAGACTTTAGAATATGTTTTAAGCCAGTTTCTTTGTG  
GTGAGATACAAATCCCCGCCGCTTTGCAGTCTATTACCAGCATTAAATATACGGACAGC  
GAAGGTGTGGAGCATAACGATTGATTCAGGTGATTACATAGTCAATACGGATTGCTCGCCTGG

ACTAGTTGTCCCGGCATATGGTTCAGACTGGCCATCAAATAGCCTTATACCTTCTGGTGGTAT  
CCGCATCCGGTATCAAGCTGGGTATACCACTGTGCCAGAGATGTTTAAGCATGCAATCAAAC  
TGCTTATTGGACATTGGTACGAAAACAGAGGGACTGTGTCTTCGGGTCAATACCTAGCAAT  
ATCCAGTTTACGATTAACGCTCTCTGTGGCGACCGGTGTTATGGCGTCTGGGAGGATTAAT  
GAATATCGGCCAACTCAGACAAAGAATAATTATTGAAACTCCCACTACTAGCCAAGATATG  
GCTGGCGGGTACCCAAACATGGAGTACTTCCCTACTGTCTGGGCATCTGTTGAGCCTCTC  
AGCGGGCACAAGCTATTCCAGGCAAACAGGCTAATGCTGATATCACGGGTATTGTCAGAA  
TCAGGTATCAGGCCGGCATTGAACCGACCATGAGAATCAAATATGGTAGCCGGACACTCAG  
TATTGTTTCTATTATCAATTCTGGTGAACGGAACATAGAGCTTCAGATTATGTACAAAGAGG  
CTCTAGATTAGATATGGACATTAACCTTGAGGGCAAAGCGAGTTACAACGGACTATCCTCC  
AGTTAGCGAAATCAGTACAAGCTGACAAAGTAGAGCCCATCCTGATGGACGCTGCCAAAAT  
GGTCAAGAATGAAATTAACAGAGTACCAGTTAAAACCTGGGGCACTTAAAAGGCTGTA  
ACCGCTAAGAAGATGAAACGGCGTGACTTGTATAAGCCCGCGCCGGCTATTGCTGCTATAGA  
CCGGAAGAAAGCCCCTCACGCCATTTGGTGAATATGGCAGCCCAGGCCGTTATGCCAAA  
AAGGGTAAGAACAAGGGCATTACTTTGGAGCAATGCCAGCCCGCCCTTTCTTACGTCCTGC  
ATGGGACGCCTCACGTGACCGCGCCCTTAATCAAATAAAAGACGGGCTAGAAAAGCAGATT  
GCGAGTGCAAAATGAGCTTTGAATCATCTTTTTATACTTGGCTTAAAGCCAATGTGCCGCTA  
GCAGACAATCAGGTATATGCCGTAATGCACCGCAGGATGTCAGTCCGCCGTATATCGTGTA  
TACCCTTATCTCTGCTCCGCGTGATTATACTCATGATGGCCCATCTGGCATTGTAGAAGCGCG  
TTACCAGTTCAATCTTTGTGCGGAAACATATGCCGGAGCCAAAGCAATGGCAGACCAACTCA  
GGGCTACCTTGAGTGGTTTTAGTGGGTTGTTTGAATCGGTTACTGTTTTCTCAGCTATGCTTG  
ATACCGAACTGGATAGCCATGAGGACAATACCGACCTATACGTAATATTTTGGCATTACATT  
ATTTTCATATAAGGAGTAAATAAATGACTAACGGGAAGAAAGCCTTTGGGACGATGATTGCC  
AGAAATGGCAATACCATTGCTGAATTGACCACTATCAACGGCCCGGCGATGACTGCTGATAC  
CATTGAAATGACTAATCATCAATCTTCAGATGATTCAGGGAGTTCATCCAGGGGTTGAAAG  
ATGCCGGCGAAATCGCGCTGGAAGGGAACCTTATTCCGGGAGACAGTGACGGGCAAATCGG  
GCTGAACACCGACTTTTTAAACGGCATAAGTACAGAGCTTTGTAATCACTTTCCCGGCAATA  
TTGCAACATGGACATTCTCCGGTATTGTAACCTCGGATTGAAACTCAAGCTCCGTTTGATGGC  
AAATTGGCTTTCATGGCAACCATCAAAGTGACTGGTAAGCCTGCACTGGGCATCAGTTTATC  
TACTGGTTTTAACTACACCTTTCTTTGTCAATTTCTGAGAGCGCTGTTATCACTCCCGACCCTGC  
CAATGATGATTACACCTATGTGGCTACTGTCTTACCAGGTGTTACATCCGTTACTGTTACCCC  
TACTGCTTCCGCTGGGGTCATTACAGTAAATGGCAATGTGGTTGCGACCGGGGAAGCTTCCA  
GCGCTATTGCCCTGGGTGCAGCTGGTAGTGTAACCTGTCATTACAATCGTAGTAACCGAAACC  
AATAAAGCCCCAAGACCTATACCATCTACTTGAGCAGGGCTGCCAGTTAAGGAGTGAAGT  
ATGCCTGATATCGTAAAAAATATCCCATTACTCTGGATAAAGTCCGTAACCTCCGGCTTGA  
CCTCAATGCAATGGTCTTATTTGAAGAAGCCACAGGAAAGAGCGTGTTCAAATCGGAGCT  
GATATGTCGGCTCGCGATATACGCGCTCTTCTCTGGGCTTGCCTGCGGCATGAGGATAAAAA  
TTTGACAGTTGAAGCCGTTGGGCAAATGGTAACACCTGAGAATATCCCTGATTTATCAGCCC  
AATTGATAGAAGCCTTTAACTGCCATGCCTGAGCCTGAGAGCGAAACTCAGGGGGAAGC  
CCTAAGCCGCTAACTGGCTGGAACCTGTGGGCGACTGCTAGGTATGACCTGAGACTCACAG  
ATACACAGTTTTGGCGGCTAACATTCAAAGAATATGTAGCCCTGCTTAAACGGATAGAAATT  
AACCATGAATGGGAAAACCTACCGGGCAGGGCTTATCTGTTCAAGTAATAGCAAACGTAAACC  
GAGATTCACGAAGACATCCGATAGCGTATAAGCCAGATGATTTTATGCCCAAGAAAAAAC  
CACAATGACCGCTGACCAAATGCTTAAACAACATTAAGGCATTGAATATCGCGTATGGCGGTA  
AAGAGGTATAACCATGGCCGGTGAATAGGAAAATTATTTGTAACCCTGAGTGCTAATACC  
ACTGACTTTTCCGACAAGATGGTTCGGGGCTGATAAGTCTCTTGGGAAACTGCAGCGCTCTAT  
TGACGCCACTGGCCAGAATTTCCAAAAGCTCGGCCTGAAGATGGCAGCGGTTGGGGGAGCT

ATGATTGGCTCCCTCGGCCTGCTGGTAAACAAGTATGCCGAGACGGGTGATGAAATAGCCA  
AGATGGCCAAGCGTACAGGATTCGGGGCAGAATCATTATCTGAACTGAAATATGCAGCTGA  
GATGAGCGGCCAGCTTGACTGATTTGGAAAGCGCTGCCAAGAAAATGAGCAAATCAATC  
GTAGATGCTTCAGAAGGCTCAGCGTCTATGATTGAAAATTTTGATTATCTCAACCTCAATAT  
AGAGGCCTTGCGGGATTTAAGCCCTGAAGAACAATTCTGGGCTATTGCTAATGCGATGTCCG  
AACTTGAAGACCAGACATTGCAGGCAAGTATTGCTCAGGATATATTCGGTGGGTGAGGTACT  
AATCTATTACCGCTTCTGGCCGAAAGTAAAGACAGCATCGCTTCCCTTCGCCAAGAAGCCCA  
TGACCTCAATATGGTCTACAGTGAAGAATCAGCAACCGCAGCCGAACAATTTCAAGATAGT  
AAAGAGCGCTTGGTATCTGCTCTGCAAGGCATCGGTGTTACTATTGCTGAAACAGTAATGCC  
TAAATCACAGAGCTTATAAACAGCCTAACCGAAAACTTAAACCAGCTATGGCATGGCTA  
TCAGAACACCCTGAAGTAGTAGACGCCTTCACAAAATTCGGATTAATATTCGTAGCGGGTGG  
CGCTTTGATGTTGGGTATTTACAAGCACTCAAGGCTTTTAAGCTGATAAAGACGGCAATTA  
TGGGTGTAAATGCCGCTTTGGTATTTATGCATAGTCTGACAGGAGTTGGAATAGCTAAAGCC  
CTAGCCGGCTTGGCTATTGGCGCAGGCGCAGTTATCGGCATGAATGCTCTGATTGATAATGC  
TCTCGGTTTCAGATTCAAATTCGAACAAGCCGTTACTCAAGTGTACTCAGCCGCTACCGGTA  
CTACGACAATCAGTGCATCACAAGTTCAGCCTTTGCGCTGGGAGGGACTGTACCTGGGCCA  
ATAGGTGCACCCACACTGGCGTTAGTACACGGAGGCGAAGAGGTCATTCCAGTTGGACAAT  
CTAAGTCTCAAACAGGGCAGACAGTAAACATCAGTATCAATAACCCTGTTATCCGTGAGGA  
AACTGATATTAACGTATTACACAGCAAGTATCTGAGGAGATGCAGCGAGTATACCAACGC  
AATCTCAGACGGGCAGGTGCTTAAATGTCAAGCAGCCTAACTTTTAACAGTGTAGACCTGAG  
CACTTACGGCATAACAATCACCAGAATCAAAGATAACCAAACATCTTTCAAACGTGGCGTTA  
CACAATTGGATACCAGAGCTTACGCCTCAAAGGGTAAACGTGAATCGCTGAAAATAGATGC  
TGAATTTATCTTGGCAGGTTCTAGTCTGTCAGATGTACAGGACAAGTTGGCCAGTATAAAAA  
GCATACTAACCGCAGTAGAAACCGGCGAGCTGATTTTTGATTATCGTCTGAAATTTATTAT  
AACGCCGCCTTAGATGAGATTGACGGCGAAAATTTAACGCAAAAATACATCTCAGGCACGA  
TGTCTTCTCTGTGCTGACCCTTACGGCTACTCCACTACTGAGACCGACCAGACTGACAATA  
TAACTACTGACCCCAAAGCAGTCACCATAACTGTCTGGAGGCTCGGCATTAACCCTGCCAGTA  
TTTACCCTGACAGCTGGAGAATCCCTATCCGGGCGGATATCCGTCAAAAACAACGATACCGG  
CGAAGAGTTAATTTGGGATAACAGCCTGGTTGATACAGACGAGTTGGAGATAGACACCGAA  
CACTGGGTAGTCAAAAAGAACGGCACAGAATCTATGACTGACGTATCCGGTCAATTCCCAA  
GGCTATTACCCGGACGAACCAATGCAATTGTTATTACCGGATTTGGAACAACCGGCACATTA  
CAGACTGTATTCCGAAGTAGATATATTTAAAAGGAGTTAATTATGGGTAACGCACTGTACGC  
AAAGGCAAAAGAGGCTTTTTTATCCGGGCTTATTGACCTTACCACAGACACTATCAAGGCAA  
CACTTCTGGACAGCGCTGATTATACCCACAGACCTTGCCGCCATGATTTCTAGATGACGTA  
CCTTCAGGTGCGAGAGTGGCCACTGTTACACTTACCGGTAATCAGTAACCGGGGGCGTATT  
TGATGCCGCTGATGCCACTTTCAGTTCGGTTACGGGTGACCAGTGCAGATATATCATTATCTG  
GCAAGACACTGGGACAGAAAGCACCTCGCGTCTAATTGCCATTATAGATACTGCTACCGGTT  
TGCCCATTACTCCCAATGGAGCAGATATAAATATAGTCTGGGATAACGGGTCAAACAAGAT  
ATTCAAACTTTAGGGGTGACTAATGTACGCCAGAATTGACAGCACCCAAGTTAATAAAAAG  
GGACAGGAATTTGTCCGGGTAGATTTTTACCTTGAGAAGGGTGAGCCTCTTTATGACGGATA  
TCGTGTCCGTATGCCGGCCCGTGAGCTAACCGAGAAGGAGCTATCCAGCTTAACCAGTAAAG  
ACGGGGCAATCTCAAAGCTGATTATGAGGCTTATGTGGATAAACATATCGGCTGGGAGAT  
GAAGGACACCCCGTTTAACTGCCATATGTTTCGCACATCCTGCCACCCTTGAAGACCTTGACG  
ATGCGGTACAGGCACGTATAAAGCTACTGAAAGCTAACTGTGCCGAGAATGAACAGACTGG  
CTGGGAGTTTAAACCTGCACGGCAACTCTGTCCGTTGACTGTATGCTCTGCCAAATACTCCG  
CAGGGTTAAAGGAGATACTGCCCGGCACAGAATAATGGAGGCTTGATATGGGTGAAATAG  
ATATTGGGCCGGGTGCGACAAATAGAGGAGATAACCGAAGCTCTGGTTACACTAGGATAGA

CGCCAATAATCCTGCCAATGATACCGGAATATTAGATACGATTGAAGTATGGGCTATAGCTC  
TAAATCTTTCTAATTTTAAAATAGGTACATTCTCAGGGTCTGGTACAAGCTATGATGACAGA  
GATTATGAAACTATAGGGTCAGTAACGGCTGGGTCAAAGCAAACATTTACAGGCCTCTCTAT  
TGATGTAGCAGCTAATGATTTGCTAGGTTGTTACTATAGTAATGGCTTTTTGGAAAGTGATAC  
CGCTGGTTACAATGGTATCTATAATAAAAATAGCAGCGGTGACGCGTTTGGCTCTGGTTTCA  
ATACGTATGTCCTTGCTGCAGGCGATGCTTTATCCATATATGGCACTGGTGAACCTCTGCCG  
CAACCATTTCTCCATCAGCTATAGCACCCACTCTTGCTTTTGGCACTGCAAAGTTAAACCAA  
ACATTGTACCTTCAGGAATTTCTGCCGGTCTTATTTTCGGAACGGTTAATCTAAACCTGAACA  
TTCTACCCTCTGGAATTGCCAGCACTTTGGGCATTGGCGCACCTATCATATCATTTGGTGGGT  
TTAGTATTGCGCCAGCGGTATAGCTTCCACACTGTCCTTTGGTATAGCTAAATTAACCTGA  
ATATCCTGCCATCTGGTATAGCGTCAGGGCTTGCTTTGGGTGAACCTGAGCTTAGTATCATTG  
TATCAGGCGTTATAAGACCCAGTGGCATAACCATCTGGTGTGGTATTTGGCACGCCTATTCTCT  
CGGCCGCAGGCCTGCATATACCGCCCCAAAGCAGATATGTAGTTGAACTGCATAATCCGATA  
ACTCAGGGTTGGGAAATACCGAATAGCCATAATGACCCGTCAGTGCATGGGAAGGTGAAC  
CTCTTACATATGACGGCAGCCTTGTTTCTGGACAGGCGTATACACTAACCACCAACGCAAAA  
CTGGAACCTGATACCTGACAGCCCCCTCTATACCAGCAAATTACGTATTTATGGCGGTGCGAC  
TAATAACGGCACCCCCCTATAACCCAAATATTGTGCTGGATGTGTATTACAGCAGTGCTTGGC  
ACAATGTATATACGGGTGGGATACAGTATGATGCTTGGGTGGAGAAATCTTTAGCGTCTCCT  
CAAATATAGAAAAAGCCAGAGTTTCTGTACCGACACTTTATCAGCTTCATATCCGATTAA  
GAACTTTTATGTCACAGAATTCTGGTTCTATGCAGCCCCAAGCGGCGGCGAATTGCTCTCAA  
TATTGGAAAATGCTCACTCCATAGCCATAGAACAATCCCTGAACAAATCCCCGGTAATTTCC  
CTTTCCCTGCCAGCTGGCGATGATAAATCTGTACTGTTGACCAGAGCTAACGAGGTCTGGAT  
ACGGGATATTGTTACTGGGGATGTCATTGCATCAGGCATACTTGATGAACGAGTGGATACGA  
GATGATAACGGACGTTGAATATAACAGGATATCTGGCCAACTGGCCAACGAGTGGATTAGC  
AGTTACTCAGGCTCTTTTGTCTCAACTGCTACCCTCATTGATGAACTATTATCATACCAGACT  
TCACCTTACCCTATAATTCGGGGAGATGTCAGCGAACAGAGCGGTGCGATAAGCATATCATT  
TACCAATTGCTCTATTCTGGCTGCTCTGGAACAGTTGCAAACCGTATACGCCCCAGGGCATA  
TGGAAGTTGATAATAACCGCCAGCTGAACTGGTATCGTTTTGGCGCACATGGTTATGCCGGC  
CAGCAAATCCGCTACCGCAAAAACCTTATCGGAATATCCCGCAGCATAGATTATCGCCAGTT  
AGCCAACAAGATATACGCCTATGGTGCCGGCACATGGGGTAGCCGAGTGCATTTATCCTCTG  
CTCCCGGATATGCCCTTGATTATGTATATGACACTACCTCTCAGGCCACATGGGGAGTTATTA  
CTAAGACCATCTGGGACAATAACCAAACCAGCGCCCAATTGCTTAAAGGGTGGGCAGACTC  
GGAACCTGGCCAAGCGGAAAGACCCTATATATACCTATAAAAATTAATATGGTTGACCTCTCCA  
AAGAGGCAGGATTTGAGTTTAAATAGCCTCAATCTACTTGAGCCGTACCAGGTGATTGATGAA  
GAGCTTGGCATATCGGTTGAAACCCGTATTACCCGCATCAATCGGCGAGACTTATCCAATCC  
TTATGACATTGACGTGGAGCTATCCAACAATGTGGTCAATATCAGCGACACCATCGCAGAAC  
TCGCCCGGCGCAAATAA

>195

TTATGCCTCTATATCAATTGTGATCCCGGACTTGAATTCCACAGTGAAGTGGTCGGCAAAGA  
CGGTGATCTTCTCGATGAGCTTTTTTACCAGAGCTTCGTCGAACTCTGTGATGTCTGTTTTCT  
GCTTGAAGATAAAGTCCTGCAGTTCCTTGATCCGGTTCATGGCTTCTTCCCGGTGGTGGCTGT  
CGACCTCGGACTGTTCTTCTGTTCCCTGAGTCTGAGGATTTTCGTCAGCGATGGCATCGTAAT  
CCTGTTTGTGTTTGCCTTCTTGATGAGCTCTTTTTGCAGTTCTTCCAGCCGAGCTTGAATGCC  
ATCCGGCGATAGGGTATCGGCGCTGACTACGGCCTTGGCGATATTGGCCTGCAACTGTTTTA  
GAAAGGTGCCGCGCTCTGTCAGAATCTGATTGATGACTGTGACCGTGACTTCTGCAGCAGG  
AGCTCGTTAACCGTCCGGTTGGTGCAGTTTGTGTCTGCGGAGCCCGGCTCCAATCGGCTGAT

GCAGCGCCAGACGATGGACTTGCAGCCGTGGTTATTCCAGTGAACGCGCCGGTAAAGCTCG  
CCGCAGTCTCCGCAGAAAACCATCTGTGCAAAACAGTGATTGCAGGAGAAGCTGCGTTTTCTT  
GCCTGTCGGGCTGACGTGGACTACTCGGGACGGACAAGCTCCGCCTGCACCTGCATGAAG  
AGGTCTTTTGAATGATCGCTTCGTGGTCGCCTTCAACGTAGTATTGAGGTACGGTGCCGTTG  
TTCTTGATGCGCTTCTTCGTACAGGAAGTCTGTGGTGTAGGTCTTTTGAAGCAGCGCGTCACCC  
ATATACTTCTCGTTTTCGGAGAATCTTGTTGATGGTGCTTGTGTGCCATTTTTCTTTTCTGCAC  
CGGTTAAAATGCCGTCAGCCATAAGACCGGAAGCAATCTTGTCCATGCTGGAGCCTTCGAGG  
TATTCCCGGTAGATGCGTTTTACGATCTCGGCCTGTTCCGGATCAATGACAAGGTTGCCGTTT  
TCATCCTTGGTATAGCCGAGGAAGCGGTTGTGGTTAACCTGAACCTTGCCCTGCTGATAGCG  
GTATTGAAGGCCGAGCTTTATGTTCTCGCTCATTGATTGGCTTTCCTGCTGAGCAAGGCTCGC  
CATGATCGTAAGGAGCACCTCGCCTTTGGCATCCAGCGTGTTTATGGATTCCCTTCTCGAAATA  
GACCGGAATGTTCTTGTCTTGTAGCTGCCGGATGTATTGGAGGCAGTCGAGAGTGTTTCGGG  
CAAATCGGCTGATGGACTTGGTGATGATCATGTCAATGTTTCCGGACATGCACTCGTCAATC  
ATGCGGTTGAACTCGTCACGCTTTTTGGTGTTGGTACCGGATATGCCATCGTCCGCAAATATG  
CCTGCCAGTTCCAGTCGGGATTCTTCTGGATGTACTCCGTGTAATGCGTGACCTGCGCCTCA  
TAGCTGCTTTTCTGTTTCGTTCGGAATCCGTGCTGACTCGGCAATAGGCTGCGACGCGGAGCTT  
TTTTCTGCTCGGATTGTTTTACCGTGTTCCCGACCTGCCTTTTTGGCCGGGATGACCATAACATT  
TCCATTAGATCGCCTCGCTTCAATGAGGCTGTACAGATACTCTGCCTGTAGCCTCGGATCT  
TCGTATTCTTTCTCCGCTTCTGCAAACCAGAAGTGTGTTCGGAACCTTTATAGGCTTTGAGCTT  
TTCAGAAGGTTTCAGCCTTCCGAGCTTACCGGCACGTTCCAGACGAATCGCTTCTGCCTTGTGC  
AAGGTCTCTTGATCGATGATTGCCGGGTAGAAATCATCGCCAAGGTAGTGCCTGTTTTGCAT  
TAGGCGCTTGGCTGAGCTGTGGTAGGTCTCGATGCCTGCCTCGATGGCAGCTTTTGACTGTG  
CCATTCCGGCGATGTAATTCTCGTATAGGTTCTGATTTTTAGCGGCTTCTTCTTCGTTAATCA  
CAGCGCAACCGCTCTTAATTCTGTATCCGTATGGTGTATGTCCCATATCCTCACTTCCTTTCC  
CTGAGCGTCAGGCCGCATTTCAAGTTCAAACCGGATATCGTTTTCTGGAATGAACGATGATGCG  
CTTTACATATCTGTCAAATAAGTCTTTGTGCAACTCCTGAAGCATGGCGCTCTTTTCTGCGAA  
ATGAATCAGTGCTGTGGTTTTCCGGTGACTTTATTTACATCCCCGGAGACTTCATTCTTCAGGGC  
TTCAATCTCATCTCGGAAACTGTCTGCCTGTGAAAGCAGTTCGTTTTGTTTCTGACTGTAGAG  
TACGGGATCAATGATTCCCTGCGTCATGAGCATTGTAAGAGTCTCACGCTTTTCGGTATTCTG  
AGCCAGAAGGGTTTGAATCTGCTGAATACGATGAAGGGAATCATCTGACGATGAGGTTTTTTA  
ACGATTCTAAGTAAGGCTTCAGGATTTGCCGGTGTGAAAAAATCAGCTTGTTCAACATCGTG  
GTGAATGCCTGCTTCAGCGCATCGTCTTTTACAAATAGCATGTGGCACCTATCCTTGTCTTTG  
ATATGGGTGTTGCAGCACCACGCGATGTATTTGTGATCGGTGCAGCTATGAATCCGGCGCTT  
GAAGGTGTCCCGCATTACCCGCAGATGATCTTGCCGGAGAAAGCATATCGGTTTTGGTATT  
TATCGGTACCTTTTGTACGCTTTTTTCGGAAGCCCGCTGACTTATAAAAATCCTTGCAGCTT  
CAAATCCTCACGACTGATGATCGGTTTCGTGATGCTCCGTGACCATGTATTGCGTCTGCTCAC  
CGTGGTTGTTGTGTTCGGACAAATTGTGAATCAGAATAGGTTTTTCTGGAAAAGGCAGTCGCCG  
ACGTATTTCTCATTGAAAGCATGCCGCGTATAGTTGTGGCCGTCCAGCGTCCGCCTCGCTTG  
GAAGAAACGCCGCGACGGTTCAAGTCATCCGCGATGGCGTGTGTGCCTTTGCCGGAGAGCA  
GAGCTGCGAAGATTTCTTTTACCACAGCTGCCTGCTCAGGTTGATTACCATCTGTTTCGCCGT  
CCCAATCATATCCGTAGGGTGGGTAGCTGCATTTGAAGGTTCCGTTTTTGAAGCGTTTCTGA  
ATTGACCACTTGCTGTTTTCTGATATGGAAACAGATTCATTTCCGGCCATGCCGGAGAGGAT  
TGCCAGAAAAAGCTCGCTCTCCATCGATCCGGTGTGATGTTCTCCTTCTCGAAGAAGATCG  
GAATGTTTCAGATCAAGCAGCTTTCTGACCAACTCTAAGCAGTCCGTTGTATTTCTGCTGAAG  
CGGCTGATAGACTTCGTAACAATGAAATCTATCCTACCGGCTTTGCAGTCACCGATGAGCCG  
CATGAGCTCCGGACGCTTATCTTTCTTAGTACCGGTGATACCCTCGTCGTAGTAGAGGCCTGC  
GAACTCCAGTCATCACGGGAAGTGATGTAGGTTTCGTAGTGCGTCTTCTGAGCCTCAAGGC

TTTCAAGCTGTGCATCGGAATCTGTGGAGACGCGGCAGTAGGCGGCTACCCTGATCTTCTTG  
AGCTTGACTTTTGTGTTTCGCTGCTTCCGCGATTTTTGTTACTTTTTTCAAGGGAAGTCCCTCCT  
TTCCGTACGTCTATACATCACTCTAAAGCCGCTACATATCAAGGTATTTCTGGCATTATTTCC  
GCGAACAAGGGAGAGAAAAGTTTCCCGATTGATGGCGGTTAATTTGTTGAATTCAGCCACAG  
AAATCAGGCCGTCATCGAGCATCTTTTTGGAGATATCCTGCGCCCGGCTATAGTCCAGATCG  
CCTTGAATCCGCTCCTGTGTAATAATCCAGATTGAACATTTGTATTTTCGTTTGGCATAACA  
TATCCACCTCCAGTTTCCACTGGAGATTGCAGGCTGTTTTGAGCGGAGGAAAATAAAAAAAAA  
CCTGCGGGTATTCCGAAGAACAACCTCGCAGGCATAGCAGATGGGATATTCGGTTATTTCACTC  
TAATCTTCCAGCCGGTCAGGATCAGGTTTACGTTTTTGGATGAGCGTTGGATTGAGTTTTTAA  
TCGCAGAAACAACCTGGTGTACATACTTTTGGGCGATGGAAGAGAGGGTATCGCCGCTTTTCACG  
GTATAGAAAACAGCAGATTCCTCTTTGCTTTCACCAGAGCATTGACCTTTGCCTGCACAGC  
AGAATAATCATACCCGGCAGCGGTGAGGCGTCTTTGCGGTCAGTTCGGTTTCCCAATTTGCC  
GTCCAGCACTTCTTGGCGAGCTCGTCCACGGTCTTTCTCAGAGCAACCGGATCAGGAGTGA  
CGGAGCCGGTATTGTACTTCGGTACGCCATAGCCACGGATGTATTTGCCGTTGACCTGCAGC  
GTTCGTCTGCTGACAGAATCGCTCTTATTTCTTCGATGATGGTGTGGTCTTGCCGAAACC  
TCTTCGACGATAACCGACGTGATCTGGCCAGCCGGTGTGTCTCCGGAACCAGAATCCTGCCA  
GTCATAGAAGATAACATCGCCGGGAGAAGGGAGATAAGCATCATTTTCAATCCACTCACCG  
AGCTTTTGGAAAAGGGTGACCATCTGACCGCAGCCGCATTTCGGTCGGAATGATATCGGTCAG  
GCCGCACTTGATGGCGAGGGCAGAAACAAAAGTTGCACACCATGCGTCTGTGTATTTACCG  
CATATCCTCTGGCGAGGGGCTTGTGGCTGTTATAGACGTCAATAATTTCTCTATGGCTGCCGT  
CGGATTCCTTCTTCCAAGCCATGCTCTTGTGCGATGATCTGGTACGCTGGGAGTTTG  
TCGCTGGAGCAGGGGTGTTGTCGTCAAAGGCATCCTTCGTATAGCCGTTGAAGCCGCCGCTC  
TTGATGATGGCGGGATAATCCACATAGCCATAGTCCAGATCTACGTTGCCGCTGATGCCATC  
GACAGAGCCTTTGGAAGAATACTGCCAGATGCCGTAGTTGCCCTTATAGGAACAACCTTGCTGG  
CATATTGTGCTACCCAGTGAGCGTAAGGCGTGAGCTTCGTGTCGTCCATGCGCTCTTTGAAG  
CCAGAAACAGCGGAGCCGTAAATGCCGACGAAGTATCCGGCGGATTCCATTGTCTCGCAGA  
AAGCAATGGTGGCCTCCGTGATAACCGACCTTGGCAGAAGCAGGTTGTGCTTCATTATCCATG  
TAGACCGGGTATTCAAGCTGTTTTCCCTTCAGGATTTTCAGAAAGCGCTCTGCATCAGCTTTT  
CCGGCGGCAGCGGTCACGCAGTCCTTACCGACAAAATAATATGCGCCGATAGGAATACCGG  
CTGCTTTTCGCACCTTTGTAATTTGCTTCCCACTTACTATCCGTATAAAAACCGGCATCGGAGC  
CGCCAGCTTTGATGATGGCAAACCTCGATAACCGGCCTTTTTGACCTTGTTCAGTCAATGTTTC  
CCTGCCAATGGGATACGTCAATTCCTTTATTCATCATGCTTGTGTTCCCTCCTCACTGTGCGGG  
TCGTGGAGCTGCTCTAAAACCGCTTTCAATTTCTCAGGGATAGGTAGTCCGAGATGAGCGGA  
GTTTTCTGTGACAGACAGACCCTCATTGGACAAATAGAAAAGATGATCGCCGTTCTGAGCA  
CTCCCGGCTGGCCGAGCACCTGAACATCAACGACGTTTCCAATACCGACAAGCACGAAGAT  
GAGCACTTTGCGGCAGATGCCTTTGAAGCCCCTTCGCTGGACAGCTTCTTATCGACGATGG  
CGCACATAACACCAGTGATATAGTCGCAGACAGCAAAGATAATCAGGGCAATCAGCAGCCC  
GTCACATCCTCCAAGGAAGTAGCCAGCCATCCTCCGACAGCGGCAAAGCTAATTGAATA  
GAGTTCCAGAATTCTTTCATGTTGTGATTCCCTCCTTTTTCTTGGCATGAAAAAAGCAGCTGCC  
GCCTTGGCGCTGCCTAATTCAGGTTACAGGTTATAGTATTCTTTTTGGCTTCCCGCCGCTACC  
GATGCGTGCAGGAGTAGGAATACAAATTGTTGAAAATGGTGTCCGTATCATCATAGCGGTCAA  
CCAGCTTATAGCGGAGACATACGGGTCAAAGTATCTCAGGTCTTCTGGCTCGATATATGCT  
GACTGCTGTTTCCCTTTTACAGAGAAGCGCTGTGCAGCTTGAACAGACGCGTTTCAATTCCTTG  
GCGTAGTTTTCCGGTGTATCGCCTTTAAGGAACCAGTGCTCGTCATGCCATTTGCAGTCATGG  
TAGCAGGCGCTGTTTGAATCATGGTGTACTGATAGCCGGTCCGGGAGCTGTTGCAGAGCTTC  
CAGATGCCGGGCAAACCAGTGGAACAATAACAATCCGGTCATACATGGAATAATCACCGGTT  
TGAAGCTCGGATAGGGTCAGCGCCCGCTGATGGATAACGTAAGCCGCACTTCCGGATATTC



CTGCTTGATCCTTGCCGCCAGCTTGTCATCATTGAGAATAAACTGGTGGATGCCAAGGGCGC  
GGTATTTTCGGATCATGGTGATGGTTGTCTTCTTCTGGGCGAGTATGCAGACAGGGATGCCG  
AGGGCGAGAAGGCTTTTGATGCGCTCGACATATTCCTCGTAGGTTTTTCGGATAGTCGCTCCG  
GAAGGTAATGTCAAAGCGGGTATTATCGCAGTCATCCTTCCACGCAGCGGCATAGATGCAAT  
CAATGTACGGAATCAGAGCAGGCTCTGCAGGAGCTTTTCCGGATAGGCCGGATCAAGGTT  
ATATGGGATTTCAAACCTTTATCATGCTTCTCCGTTTCTGTTCAGCGTATAGGTGACTTTCATA  
GTTTTATCCGCCGTCTTGATAACGGGTGTGGAGAGATTGTTGATGGTGGCGAGGTACGGCGT  
ATACAAATACAGCTCCTTACGGAAATGATATCCGTAGTAGCTGTAGAAAAATTCCTGATAGG  
CGTAGGTCTTATACATAGAGACCATACGATGTCCCACTGCTCACCGTCCGTATAAGTGTCC  
TTATTTCTTACGTAGAGGGCAGGTCTGCCGTCGTAGTAGTACCAGCCATTGATGACAACCTC  
ATCATCGATACAGAAGGTGTAAGTGTACTGCTGGTTATTGTTATAGCTGGCGTTTGCCACGACCTCTAT  
GTTTGCCACATTCGTCTGATCGAGGGCGATAGACGGTGTCTCCGATAGCAAACATCAGCCATT  
TGCCGCTCATGCCGATATTGGAAATGTCAGTAGTGTCCGAAGGCAGGATGATCCTTTGGGTC  
GTGCATCTGTCACCACTGATCTTATCCATATAACCACTCAAAGCCGGTGGCGTCTGATACTTCA  
GAACCGTATCGCACGCCAGTGTAGGTGCGGATTTCTTTTCGGGCAATGCCGTACCAGTTGCC  
ATCCGAAGCGTGGAAAAGATAATCCATTCGGTTTTTCATCATTCCAGTAAGGAGCGTCGGTAT  
CGTCTTTGCTCCCGCCTCCGGTGTAGTGCCTCAATAAAGGGTAGTGGTTCATTTTCGATGTTTG  
TTTCTCGATGGCCTCTGTGCGCATCTGAGTATAAGTTCTGACCATCAGGCGTGGCGTGGATGT  
AGTCTCCGGAACCTTTCTAAGATTCACAGAAGTGTGTTGCGGACAGCAATCATCTCCAGT  
CGGTATCCATCAGCAATAAAAGTCCGATGGTTATGCCGATAGCTGTTATTATCAATCTCTCC  
GCTGATAGGGGTGTCGCCCTTTCAGACGAACAAAATAGTTTGCACCATACTTGCAGCCGCGTC  
CGGCGAGAACATTTGTCAGGCAAATGCAGGAGATGGTGCCATTGGCCTGCGAAGTGGCAA  
GTCCCATACATATTTGAAGCCGCCGTCCACAGCCTTGCTCTCTGTCAGGTTGCGGCTGCCGCG  
CTGGATATCCTCCGTATTGTTAGCATCATTGAGGCATACCCGATCAGTGGATTATTGAGGG  
GAGCGTATATAACGGATGGATCTTCTCAATCTCGTCCTGATAAAGAAGAATGCCGCCAGTG  
AGCCGCTGATATATAGGTAGAAGCCATGCTTCACCGCTCTGGCTGTCAAAGCTGGGACTGTT  
ATACATCGCGCCTTGAATATTTGTGTTGAGAATATCAAAGATGGCTTCCGTTACAAGGTTTTC  
ATCTTCATAGATTTCTTTTTACCGGTATGGACATCTGTGAGCTCTATAATACTTTTTCTTTG  
AGCATAGTTATTCCTCCGTGTTTCAGATAGTCTGTGGTGATTGAACGTACATATCCGTTCTCGC  
CGCTAATCACAAAGCGGTACATCAGCTGGCCGGTGTATGGCTTTCTCTGCCATGCATTTGTA  
GAGATAGCTTCCAGTGCAGGCTTTTCGACATAACCGGATGCTTCTCCGATAACCTTGCCACGA  
GGAGCCGGTATAAGTCCACCAGCTTTCTCCGGCATCAAAGGAAACGGCAAAGAGCGCTGAA  
TCATCGCAGTCTACTGTGACCTTCTCAATGCCAATAATAGATGAATCGGACATGTCGATATTT  
TCCGAGTAGATTACCTGCGGTTTTCGGCACGCCGGTATAACTCGCTGTGAAGGGCGGGAACT  
GTTCTCGGAATCGTGCCAGTAGAGGATGGTCGGATCTACGAGCGTAAGAAGCAGGGCTCCG  
TCCGGGATATCCTGCACGCCGTAAGTTTCAAACACTTCTGCGGTCAGCTCGGTTTCACTGAG  
CTTTAAAAGGCTTCTTCTCCACGGTATAAAGGGCTCCTGTGGCGTCTGTTATCAGATAGCG  
TCGGTTGTATGGATCGAGAAGCACCAGGCTCATCTGAACGGACGAAGGCTGTCCCACTGT  
CATTCTGGTGCAAAAAAGTCAACATCCTCCTGCAACAGGCGTGAAGGAAATATTCCCGGTA  
CCGTTACAAGGGTGCACCTCGCAAGGTAGGAAGGGTTTTGTGGTATCGTTTTCAAATGAA  
GAACGATATCGCCGGTATCCAAAAGCAGCAGATCCAGACCAGCTTACATCAGCACTCGTC  
ATGCTGTACTGTGAGTATCCCTCCCAGCGGACGCGCAAAAACCTATAGTAGTTGTAGATCGT  
CCCTTCTCTCGACGGATTGTCCAGCTCATTGCGTCCGCGCCGGTGGACTTTTACCTGTTCCGC  
ATTGGTGCCAATCCCCATCCACGAGTTTCCATTTACATAGATATTCTCAGCGGTCACGGAATT  
GTAGGTAAACCAGCTGACACCGGGAACAATGTCCGTGCCACTGTCATTTCCGACGTTGTTTC  
GTATATAGGTCATGTTATCAGTGCTTTGAAGAAGCTCTGAGATAGAAAAGTAATCAGCCACT  
TTGCACCTCCAATTCTGTTATCGATTGCAACCGGTAAGTCCAAGCGGATAAACTGCAAGTC

TGCCTCGGTTCGATTTCTGCGGCCTCACCCCTCGATGAGTTCGCGCATACTCGGTCTTTAGCTTCA  
GGCTGCCATTTTCATGAATGGTATAGGCAGTGTCTGTGAGTACCCGTGCCGGGAGGATTCTT  
CCATTTATGAATGGTTCGGTAACAAACGGATTGATTACGATGCTTGTGAGTGAATCAAATC  
TGCTGTTGAAATGGTCAGCGAATCCATACGGCCACGGTTCAGGTTTCGCTCAGTGCCACCAA  
AAATTGTGTAAGACTTCCGGAGAGAAAACCTGTGTATCATCCTCTATATAGTCTCGGCTGTAT  
GACATCTTCCGTTTGTGCGTTACATCCACGATGTCATGAACAATAGGCGCAAAGGTGCGCAC  
GTTGTGCGAAAGGGCATAAAGTGCCATGCCGGATAGGAGCATCGGCGACACAGCATCAGAA  
GCTCCGGCTGGTTCGGGTGTATGGAGAATGGTCTCCATGGCTTCTTCAAAGGGGAGATGCTG  
AAGGCCAGAAAGCACGAGCGGAATATAATCGTCACTGGCATCAATGCGGCCATTCCATCTG  
TCCTGAGCACCCAAGCCTTGACCGGTGATGGAAGCAATGATGTTCTGAGCATTATCGTTGC  
GCTGCCGGGAGCAATAGTGATCCATACGGCAAAGGTGTGCAAGTGTCTTTTCTGTCATATCCA  
GAAGCGGATAAAACAGGTTCCAGGATATGAGCACCGGTGTGCCAAGTCTCCATCGGATGGAA  
TTCTCCACCTCATGGCCGTCAACAACATACCCGACTCTGATGACAGACTGGCCGTCCTCCT  
GCCATTCCACAGGTACGGTAACAGTGGTTTCAAGTCTCTGTCATTGGTGTATGGGATTATCGT  
TCTCATTCTGTGGTTTCTTCGGGGAGAATAGTGGTTCCTGTGCCCTCGGCAGTAACGGAACGA  
TCCACTGGCGCTGCCGTACATTTATAAAGGACAGCAGCTTTGAACTCGCAGTCTGTTTCTTCC  
TGCGTGGCAAACCTCCAAGCTGACGATGAATACTGGCTCCTCGCCAAGGGTGTAGGGCATGG  
CATTATATAGGAATAGGTCGCCATTTTTGTGCTCTCAACAGAATTGATAAAGGCCGGTGTATG  
TCCTTATCATTCTTGCTTTTTGCTTCCGCAAGGCGAGGATTTTTGCCGACACATTTTAAAGAG  
CATTCCCATTTATCTTTGTTGTGATGGAAGTAATCGCAGCCATCTGGGAGGAGTCCGCCTGC  
CCGCCGGTAAAAGTGAGCACATCGCCGGGTTCCAGAGCAGGATCACCTATGGTCTCGGAAT  
CAAACGGAACATAACCGAATGACCGAGATTGCATTACAGGATGTTGTTGAGAATACGGCTTCTG  
GTCTCATCAAGTCCAAACTGCAGCAGAGGATTTGTCTCAAGATTCATGGTGTAGGCCGTCGTC  
GGGATCGAGAGAATAAATATTCGGCGGTATTAGTACGTCGGTTTGTGGAGCTGATCGCAGTAT  
ACCTTGTACGAAATCCGAGAAGCTGCTGGAATAGCGGTGGGTGTTATTTACCGTACATACT  
GGGCTTTCACCGTACTGAACCAGCTGCAGCTTTCCTCGCGGTTGATAAAGGCAAACGAGCA  
GAGCGCCTGCGCGAGATAATGCAGGAAGTACGCCAAGTTTCGATATCATTATCCGGATAA  
ATACCAAGGAGCTCTGCGCCGTTTGGCAGGGCTTCGATTTCTTCCCTGCGTATGAGCAAGCTC  
CACATGGCATGTGCTACACATTGCAGTGAGAAAATCATAAGGATACCCGCTGGATTGCGCCT  
CGCTATACGCCTTATCAAATTCAGCATCGCGTCATAGGCTTTTATCTCAAGCGTTTTTATTT  
TCCGGTTTGCCTCAGCGACATAGAAGATGCCCATCGGGACGTCCTCAACGGTGTGATCAGAG  
AGGTTTATATGAAAGATGAGCTCAACCTCTGCATTTTCCAAGGAATATCGGTCAATATCGGA  
AAACAGAGAAATTCCAAGCTCTGCCGCATAGACAGAGCCGAGCTCGATTTTCAAGGAACCG  
GAGCACTGCCGGGAAACATACCCGGAGCCCTTACGATGTCTCGTTTGTGAAAGGATATTC  
TCGTCCGGCGGTTGTGGTGTATCTTCCAGACCATGTGAAGGAGCGAGTGTTCCTGTATCG  
CAGTTTTATATGCGTCTGATACGCTGTACATGAGCATCGCTCCTTCCCGTTAATATTCCTTC  
AGCGTGAAGCTGACCTTCCATAAGCCTTTCTTGCTGGTGTGCTGGGCAAGGGAAACCTTGAA  
GCCGTCCATGTACATCTCACGTTTTTCCCTGACCATCGTCTCGGTATTGAAAAAGTCCACAG  
AGAGCCGAGGGAGGCTCCGCATTGCTGACAGGGTTTTAAGCCATGCGGGAGACACCTGAAA  
GGCCACAGATATTTCTGCCACGCCGGAGCGGACAATATCTCGCTGGGTGGTTCCGGCCTCCG  
TCTCTCCGGAGCTGTCCGCTCCACATCAGAGAGGGACAGGTCATAGGAGGCTGGAAGCGG  
CATCTTACGCCGTCAATATTCAAATAGTGTGAAAAAGCCATCATCTGCCTCCTGACCGGAG  
CGCCATTGCTGCTGAGCTGTGACAATCGTCTCGTCAAGCAGCGTGCCTCCAAGATAAACCG  
GGATGGTGTATATCGCCTCCGCCGCCGACACCTGCAAGAGCAGTAACGATAGCCGAGGTCTG  
TCCGGCCACTGCATCCTGAATCATGCCGCGCAGGGAGTCAACACCGACAATAGCCTCCGCAC  
CGGCTTCTCCTGCGCCAAGGAGCGTATTCCCGCTCATGCCGAAGATGGTTCGGTGAATCGAGG  
ATCATGCCGTTTCCCATCGCCTTCTTGTACCATTCCACAGAAAAATGCGGGATAGACGGCGG

GTTTAGAGAGAAGCTCCCGGAGATGGAGAAGTGCGGCAGTTTGATCTTTGGCAGCTCCCAGT  
GGAAGTTGAATACGTTCTTCAGCTTGTTACGATGCCGGAAATAAAGTTCCAGATCCCGTTG  
AACACATTAGAGACGGTATTCTTGATGCCGTTTAGGACATTTCGATATCGTATTTTTTATGGCG  
TTGAAGGCTGTGGTGATGCCGTTTTTACGGTATTTACCACAGTCATGATGGTGGTCTTTATC  
CCGTTCCAGACCGTAGATACCACAGTTTTTATGGCATTTCATCACAGTAGTGACCGCTGTCTTT  
ATGGCATTCCAAGCCGTGGTGATGAAGGTCTGGATTGCCGTGACGACTGTTGTGACCACGGT  
TTTTATTGCGTTCCATACCGTCGTGACCACTGCCTTTATCACATTTCAGGACGGTCTCGATGAT  
CGTCTTGTAGATATTGAAGTAGGTGGTGACGATAGTTTTTATCACATTGAACACGGTCTCAA  
AAACAGTCTTTATGGCGTTCCAGATCGTTTTCAAAGAAAGTCTTTATGGCATTAAAAACCGTC  
TGCACCGTGGTCGTGATCGCCATCCATGCATTTGTGAGGAAGGTGCTGATGCCGTTACCCGC  
AGCTTCGAAGATTCCCTTGATGGTCTCCAGACAGTGGAGAAGAAGCTCTTGATCGCCTCCC  
ATGCCGTAACGACTGCCTGCTTGATGTTTTCCACAGGTCGATCCAGAACTGCCTAAAGCCC  
TCGTTTCGTGTTCCAAAGATAGATGAAGGCAGCCACCAGCGCCGCAATCGCAGCGATGATTA  
GGACGATAGGATTGGCCAGCATGGTCGCGTTCAGGGCTGCCATCGCGCCTTTTACCACACCG  
ATTGCAGCAGAAACCTGCGGTATGATCGTCATAATCGTGCCGACCGCCGAGATGATCTTTCC  
GACCACCACAGAATCGGGCCGATAGCCGCAGCCACAAGGGCGATCTTTACAATCGTCTGCT  
GAACCGGAGCCGGAATCTTGCTCCACATTTTCAGCAAATGCCTTCAGGGCTGCGGAGATGTCC  
TTTAAGACCGGAGCCAGAACGGTAGCGAGGGTGTTCGATTTCGCGCCGGTTTCCTTCAG  
GGAGTTCATCGTCATCTTGAACCTGGTCAATCGGGTCGAGGGTCTCGTTGAAGGTGTTCTCGA  
CACTTCCCTCAAAGTCACCGAGGGAACCGGCAAGGTCATCAAGACTCAGTTTTCCCGGTCTGG  
ACGGCATTGTAAATCGACGCACCTGCCTTGCTTCCGAAAAGGTCATAGGCCGCCTGCAGCTT  
TTCCGTTTCAGAGCCGTTGCCTTTCATGGTCTGGGAGAAATCAGCAAGCGCCTGATCCAGCG  
TTTTGCCGTCCTTCGTGCGATTCTTCATGGCGGTCTTAAGACCCATCATGGCAGATGAGGTAT  
CAAGACCGGACATTTCCACCATGCCATGAAACCGGCAGCCTGCTGGGCGGTCAGTCCCATT  
TCCTTTAGCTGGATGGCATTGGAGGAAAGAGCGCCCGCAGGGTATCCATATCAATGCCGGT  
CGCCTGACCGGTGGCGTTAATGCATCAAGAAGGGAGTCTGCTTCAGATGCGTCCATAACCGA  
AGGCGTTCATAACCGAGGACACGTTGTGATAGATGTCGAAACATCGGTGTCGTTGAGCTGG  
GCAAACCTTTATGAATTTTGCAGAGAGATCATCAAGCGCCTGCCCGGTTAAGCCGAAGCGGGT  
GTTGACCTCGCCGACAGCGGCACCGGCAGTTTCGAAGTCCGTGCGTATCTCTGTGGCGAGGT  
CTTTGACGATCTGGTTCATGTCTTCCAGAGCTTTTTCCCGTAGCGCCGGTTTTTCTGCGCCACGA  
TATCAAGCCCTGCATCCACTTCATTAAGGCAGCAAGGGAAGCTGCGCCGATGGCCATAATC  
GGAGCCGTGACATGCGTGGTCAGTCCTGTGCCCACTGGATATCTTGCCGCCGACTTCCTG  
CAGCTTGCTTCCGGTCTGCTTTAAGGTAGCTGAGATATGGGAGTCTGTTTCTCTGCACTGCTG  
TTCGAGGTTTCTAAGCTCGTTTTTCTGTCTCTATGATCTCACGCTGCCATGCATCGTATTGCTGC  
TGGGTGACGGTACCGTTTTTGTAGTCCAGCATCCATCTGGTCTTGACGGACTTCAGCTGTGTG  
AGCTTATCTTTCGTTTTCGGAGACAGCCTGTTAAGGAGCTTCTGTTTCTGCTCAAGCAGCGTG  
GTATTCGTGCGGTCGAGCTTTAGGAGCTTATTGACGTCTTTAAGCTGCGACTGCGTGTTTTTG  
ATTTCTTGTTTACGTGCGGAGAGCGCTTTGGAAAGGCCGGTTCGTATCGCCGCCGATTTCCAC  
GGTTATGCCTTTTATCCTGTCAGCCATGCGATGACCTCCTTCTGTTAAAATCGATCCATCTG  
TGCCTGCGTTGCGACCTCGGCGAACGGATAATCGTCCATGTCCATTTCTGAATACATGTCGTT  
GACAGTCCCGATGGTGAGCAAATCGAGCTCCGAGATTTGAAGCCCGATCTGCACGCATCGG  
AGTAAAAGAGCGGGGTCGTCAATTTCCCGCTCAGTGTTGCGATGTTTTTTTTAGAGGTAACC  
TGCTGTTCCACGTTTCAGTCCCCAAAGCTCTATGATCTGCGGGAGAATCTCGTAAATCGAGAA  
GGTATTGAACTGGTCGAGCCAGTCCTCCGGAGTATCCGGGACATCCGGGTTCTGGTGCTTTG  
CCATGAGCCACGCGATGTTCTCGAAAAGCTCAAGGGAGAAGGTATCCAGATTAGAGTTTTCC  
GGATCGTTCTCGTCGATGCCTTTCTGCAGCTCATTCAAGTCCTTGTAGATATCCCGGTGAAAC  
TTGTTTCTGTAAAGACGAGGGATGGCGGCAGAGGCACGGAAGGTGACCTCCTTGCCGTCAAT

CTCGACGGATTTTGTACTGCCATAGTGCGCCTCCTTACTCAGTCACATCTTCCGCAGGCGTC  
TCAGGGACATTCACAGCGGCCTGCGGCTGATAGACTGCGTTGTACCAGTTGTTGTAGGTCTC  
CTCACTGGTATTGGTGCCGGTCTTGACCTTCACGAGACCGGAAGGCAGAGGCGTTGCCGTAA  
TGGAGAGCGTTTCCGTCTGCACCTCGGTGGAGTCCTCCTTTGTGCTGCCGGAGACAGAGGGA  
CGGGTCGCGCTGCAGTAGTACATGCAGTGACGGATCTTCCTCTGGTCGCCGGAGAACTCAA  
GAGCAGCGCAAATGCTCAGGCTCCACGTCTTGTTCAGCGATGACGCCGTTGGCATCCT  
CAACCTCGTGATGACATCCGTAAGAAAGCTCTCCGGAATCAGCGCCAGCTCGAAGTCGCCG  
GAATAGCCGTTGTTGTTAGAGACCATGTAATATACGGAGTCGTCCGCATAGAACGGGTGCTT  
TTCACCTCTGCATCAAGCGAAAGGGATACTGCGCCGGGCATCGCAACAGGTGTACCGAAG  
GTGACGGTGCCGTCCTCGGCCAGCGTTGCGATAGCGTAGTGGCAGTTTTTCAGGCCAAACTT  
GACCTTGTTTTTCTTATTAGCCATAGTGGTTTATCCTCCTATCATCTGTGTTTGATAAAGAACC  
TCGTACATCTTTCCGATTTCGATCCAGACCTCCGACTTCTCATAGGGAAGCTCATGGGAGAG  
GAGGATGTCTCGATGGTGGTTTCTATCTCCGGGTCTTCTTGTCCGTGTAAAGCTCGATGTT  
TAACTGGTCGATTTTCTTATAGACCGTGTGCATCAGCGAACACGTTATCCGTTCCCGGAAACA  
GAAAAACGAGGAAGGGCGGGTCTGGCGACTCACCTTCGGCAAATGGTTCGTAGGCAAGTGG  
GAGCCCGGCTTCTCCAGCATTTCGATTACATTGTGCGTATGTCATATCAGCCGCCTTTCAGTT  
TCTGCTCGATGGTCTGCATCAGCTTTTCAATTCGCGCTGCTCGGCAGAGGGCGATATGAGGCT  
TTGCAGCAACTCGGCCTCCTCCGCGCTTGGCGTGGCCATGTTCCAAGAGGTGCGCGATCTGG  
TAGCGGTTCCTCGAATGCACCACAAGCTTGATGCTCTCGGAATCCTCCCGGACGTTTTTGACC  
GACCAGTTTTTCTTGTACTTGCCGGTATCCACGGGAGCGCCTGACTGTATGTCTTGGCGACG  
GAAGCTGCCGTTTTCTTGACCGCAGCTTTCAGCTCATCAGCGGCAAGGTCCGGCATACTTTTC  
AAGCTCCTCCATGATCGCGTTATCCATTTTCGTGCGATTGATACGGTTCTGCTCATTTCCGTTTCT  
CCAGCTTGCAAGTTGAATTTGATGCTGTTTCGCTTGTAGCCCATCGGATTTACATAGGTGATGT  
TGTAGGTCTTGCCCTCAGCTATGATCCGGTACTTCGTGGATTCCACGACAGACAGCTCGGAG  
CAGTAGCGGCAGGTAATAATCCAGCGATTCTCTGGGTTTATCACGACGCCGGTGGACTCGGA  
ACCGGTGCTTGTGCCTACGGTCGCCCAGCAGGAGAAGTAATCCGTCCAGCCGTTTTTGTGGT  
TTCCGTAATTATCAACCGTGACCGCATTCTTCTGAAAGGTGACGCGCACCCGCATTGCTGCA  
ATATTCATCAGAAGCCCTCCTTCCGGGTGCCAAAGAGAAGAGACCGAAGCGTCATATTGAG  
CGCATGGTGTCTGCTTCCCTCCCGGTGCTCGTACAGGTAGCCTACGGTATAGAGCACGGCCA  
CACGGATGCGGATCAGGGCTTTTTCTTCAATTTGCCATAAACTCCTCGTCGGACTGTCTTGTGA  
TGTCCTGCACCTGCTTTGTGCGCAGCAGAGATCAGGCTTTCAATCAGGCTGTCTCTGTCACCTG  
TAGAGACGCGGAGATAGGTCTTTGCTTCTTCCAGTGTTACTTCCATGTCCGCCTCCTTTAAAT  
GAAACCGCCCGCAGAGAGGGTGATCCCTGCGGACGGCTGGTTACAGTAGTTTCTTATCCTCT  
CGAAGAAGAGGGCCGCTTGACGGACAGACCCTTTACAGCCTCCGGAAGGATGAGCTTGCCG  
TCCACGCGCTCGGAAGCAAGGAAGCCAATCTGGCCGTTTGCCGCATAGAGCTCGGAGAGGC  
GCTTGAAGGAGCGTCCCTGACGGTCAGCGATCCAGTAGAAGCTGAAGTCGCCAAAGAGGAT  
CGCGGTATTGCCCGCAGCAAGCTCCGGCGCGTAGATGCTGGTCTTGTAAAGGACGGTTCAAGA  
TGGTGTGCGGGCTGGCCAGCCACAACAGAGGGCTGCCAGATGTAGTTCCCGTTGTTGTCTTG  
ATCTTCTGAGCGCCTTGATGGTGGTATCGTTCAAGATCCAGATGGCCTTGTTCCTGTAGACG  
CTGCGGAGCGAATGGAACACGTCCATGATGTGTCGAAGGACACCGTGGCATTGTTGATCTC  
TGTGGTTCGCGCCGGTAGTGGCTGCCACCTTGGTGAACACGCCTTCGGGCTTTTTGTTGCCGTC  
GCCGATCAGGAAAGCCTCCTCCTCGGCAGCACCGATCCTGCGTGCAAACCTCGGTGGAGATGT  
ACTTTTCGAGGTGCAAAACGGAGTCGTTTCATCAGCTCCTCGGAAACCTTGATCGCCGTGCC  
AGCTTGTAAAGCGGAAAGGCTGATCTGGTTCGAAGGTATCGTCGGATTCAGGGTACAGGCCGTT  
CTCATCCATCCAAGCGGCAGTGCCGTGAGAGGGCAGCACCAGGAAATGGTGTGGGTGCCGGAC  
TGGGTCTGAATGACCGTAGCGAGGGAACGGAAGAAGTTCTCCTCCTGAAGCGCGTCGATCA  
GCTGCTTTTCGTAATCGTCCGGGACGAGATATCCGCCGTTGGCATCGGTGCCGACCTCCAGC

ACGTTCTGGACATCGTAGTAGTTGCGCTTGCGGATGTTGTTCCAGAAGGCGGAGCGGTATGC  
CTTGGAAGCGATGCCGGGCTTATCCTCCGGCTCATCCTTGGCACCGGGCTTTCCGGTAAGGG  
GAGCAGAGGTTCGGTTCGCTCATCATCTTGTGATCTGCTCCTGACGCTGCAGGCGCTCGATA  
TCGTGGGTGAGGTTCGGTACTTCTTCTCCATCTTGTGATAGGTTGCGGCATCCTCCGCAGAA  
ACCATGCCGCCGTTCTGAGAGTGGGTGTTAAGAAAAGCCTTTGCAGCCTCCCATGCCTTCGC  
TCTCTTTCCATGAGTTCATAATCTGAGTCATAATAAAAATCCTCCTTTAATGTGTGAGAAG  
CGAAAGGCGCTTCTCAAGATCGGTTACTGGTACCATGTGTTTATTTGCCTCCGGCTTTTTCTT  
AGGGATAAGCCGCGATAGCAGTGAGTCAGTGACGGCCTTGCGGGAGAAAAGCATCTCCGTA  
TCGGCCTCATCGTCCGAGGCAGGTTCTCGCCCGCTTGAACAGAATCTCGTCAGCGAAGCC  
GAGCTTAACGGCCTCCTTGGCGTTCATCCATGTCTCGGCATCCATCAGCTGTGAAATCTTGTG  
GCGGAAAGCCCGACTTGATTTTCGTAGGCGTTCATGATGGATTCTTACTTCGTTTAAACA  
TGTCGATGGCCTTCTGCATCTCCTCGGTATCACCGATGGCGATGGTCGCAGGATTGTGGATC  
ATCATCATGGCCACAGGGCTCATGCAGACCTTGGTACCGGCCATAGCGATGACGGATGCCG  
CGAGGCAGCAAGGGCGTCGATCTTGACCGTTACGTCATGCGGGTAATCCATCAGCATGTTGT  
AAATCTGTGCAGCAGCAAAAACATCACCGCCCGACTGTTGATCCAGAGGGTGATGTTTCCG  
TCTCCGCTGCTTAATTCATCTTTGAATAACTGTGGTGTGACCTCGTCGCCGAACCATGTCTCA  
TCGGAGATTTCCCGTCGAGGTAGAGCGTTCGGTCTGAGCCAAAGCTGTCCGGTTCCTCGTT  
TCGCACCCAGTTCAAAACCTTTCTGGTCATAGTGCCTCCTTCTTTTCGTGGCCGGGTGCGCTCA  
CTTTGCTGTGGCTGTTCCGGCTCTTGTTTTGATTCTTCTGTTTCATCTGGCTCCTCCTGTCCCT  
GAGACGAGGCTGCAAAAATGCCTGCGTCCTTGAGCTTGGTCATGTTGCCGTTTATAAGATAC  
AGGTGCGCCGCTTCTCCTCCGGGATACGGTCGAGATTTTCCAGCTCCCTGATATCGTTAGCG  
CTCATCCAGCCGTTCTGGCGTCCGGTCGCATAGCCGTTTCATGCGGCTCTGGTAATCTCCGCGA  
AGCAGGCCGTCCACATTGAACTTGAAGAAGTATTCCTTCTTCTCGTCCATAGACAAAAGCGC  
CCGCTGCATGGACTGTTCCAGCGGCAGACCCACGGGTCGAGCGTGTATTTACGAACCTCCA  
GCGACTGCTGCTCGATGTTGGAAAAGCTCGATTTCTCAAGGTCGCCGATCATATGAGGCGGG  
ATGCGGAAGATACGAGCGATCTCATTGATCTGGAACCTCCGCGTCTCCAAGAAGTGCGCCTG  
CTCCGGTCAAATGGAGATGGGCGTGTATTTTCATGCCCTCCTCAAGAACCAGCCACCTTGTTG  
CATTGGCGCTGCCGCCGAAGGCTGAGTTCAGCTTTCCCTGACACGCTCCGGGTCTTTTATCA  
CACCGGGATGCTCCAAGATGCCGCCGGGCGTCGCGCCGTTAGCGAAGAAGTACTAGCTCCGTAT  
TCCTCACAGGCAATCGCCATGCCGATAGCGTTCCTTTGCCATCGCAATCGGGCTGTAGCCCAT  
CAGGCCGTCAAAGCCAAGGCCGGGAATATGGAGCACATCGCTTGGAGAGAGCCTGACGCGG  
CTGCCATCCATCGTGTGCGCCTCATCCTGCGAGGTCTGATATTTCGTAGTAGAGGTGACCGTCT  
GCGTCGCGGTCAACCGTCATGCGGTTTGGCATAAGCGGATAGAGAGCCACGACCTCGCCCTT  
GCCATTTCCGATGATCTGCGCGTAGGCGTTTCCCCACAGCAAAAAGGTGCGTCATCAGCGTTT  
CCCGAAAGACAAAGGATGTCATTTCCGGGTTTGGCTCATCATGCAATAGGAAGTAGAGCGG  
ATGAGTGGTCGCTTTTTCTTGGCCCGCTGCCGTCGTACCGGTACAGGTGAACGGGCAGGC  
CAGCAATCGCCTCGGATAGAATCCGAACGCAGGAGTAGACCGCCGTCATCTGCATGGCGGA  
GCGTTCCGTTACAGCTTTGCCGGAGGTGCTGCCGCCGAAGAAGAAGCGGTAGGAGCTTCCGG  
TGGTCGCGTCTTGGGCTTATCCCGGCTCCGAAATAATCCTGAAAATATACTCATAGCCATC  
CCTCCAATCCGTTAAGGGCTTCCCGGATCACAGAAAGCCAATCAGTGAAAGTATCAACATT  
GTTTTTGTCCCTATATGAAAAGGATGCCTCTGCCGTCATACACAGAAGCACCGTTGTGCTTGC  
CGCAGCGGATCGCCCGGTCAAGTGCCATGATGGTTGCGATGGCACCGTCGATCTTCTCCGTG  
GACTTCTCCTTGTGCGCCTTGATGTTTCCGGCAGGATCAGTACGGATGAAGATGTTGTCCATA  
TTCCAGCGGAGCACCGGGTGGCCGCCGTGGGCGAGTTTCTTTTCCAGTGTGAGCTTCATCAG  
CTCTTTTCGTGGGCGGGCTCATATCCTTGAAGCCCTGACCGAAGGGAACGACAGTGAAGCCCA  
TGTTCTCAAGGTTTTGTACCATCTGGACGGCTCCCCAGCGGTCGAAGGCAATCTCACGGATG  
TTGAACCGCTCGCCAGCCGCTCGATGAATTTCTCGATGTAGCCGTAGTGGATGACGTTGCC

CTCCGTGGTTTCGAGGTATCCTTCCTTTTCCCAAGTGTCGTAAGGCACATGGTCACGCCGGAC  
ACGCTGATCCAGCGTATCCTCCGGCACCCAGAAGTACGGAAGGATCACATACTTGTCATCCT  
CATCCCTTGGCGGGAAGACCAGCACAAAGGAAGTGATATCTGTGGTGGAGGAGAGGGTCAAG  
GCCGCCGTAACAGACACGGCCTTCGAGGTCGTCCTCATTTACCGGGAAAGCACAGGCGTCCC  
ATTTCTCCATTGGCATCCAGCGAATCGCCTGCTTTACCCATTGATTTAAGCGGAGCTGTCTAA  
AGGAGTTCTCCTCGCCGGGATTTTGTGTTGCCGACTCGCAGGCGGCTTCCACCTTGTCGATGC  
CGACCGTGATACCGAGCGAGGGATTTGCCTTCTTCCAGACCTCCGGGTCTGTCCAGTCCTCG  
GAAGTGTCCGCACCGTAGATGACCGGATAGAAGGTCGGATCAACCTTTCTGCCGTCAAGGAT  
GTCCTGCGCTTTCTGGTGGACTTCGTAGCAGATGGTGTTCGTATCGTTTCCGGCAGTCGTGAT  
CAGGAAGTAGAGCGGCTGCATTCTGGCGTCGCCGGAGCCCTTGGTCATAACATCAAAGAGC  
TTTCGGTTGGGCTGGGTATGCAGCTCATCAAAGACCACGCCGTGGATATTGAAACCGTGCTT  
CGAATAGGCCCTCGGCCGACAGCACCTGATAGAAGCTGTTTCGTCCGGCTCGTAGATGATCCGCT  
TCTGGGAGGCCAGTATCTTCACGCGTCGGTTTAAAGGCAGGGCACATCCTGACCATATCCGCA  
GCCACATCAAAAACGATGGTGGCCTGCTGGCGGTCCGGCAGCGCAGCCGTAGACCTCGGCCG  
GTTCTCTCCGTCGCCGACGAAAGAAGCAGGGCGACCCGACGCGCAAGCTCTGACTTGCC  
ATCTTCTTTGGTATCTCGATGTAGGCCGTGTTGAACTGGCGGTAGCCGTTTGGTTTCAGCGTT  
CCGAACAGGTCGCGGATGATTCTTTCCTGCCAGTCGATAAGCTCGAAGGGCTTTCCCGCCCA  
TGTGCCTTTGGTATGGCAGAGCTGCTCGATGAACATCACAGCGAAATCCGCCATCTGCTTGC  
TGTAAGTGAAGGACTCGGCCATGAAGCGGGTCCGGCTTGTAGTTTTTTCAGTTTTTCGCAATTGGC  
ATGAAAGCCGCCTCCTTCCGGGCAAAAATAAAAGACCGCCAGCCGACGTGTTCCGGCATGCGA  
TTCTTGGTATCAGTACGAGAGAAAGAGCCCTGCGGCTCAGTCTCCCGGAATATTCATTCTCA  
GGGGTTTTAGTTGTAGTTTTTGCAGGAGGATCATGTAGGCGAGCTGCGTCCGGCTCATCCTCCG  
GCTCGATGTCCCAGCCTCTGTCTGATTTGGCTGTGACGGTCCGTTGATCTTGATCATCAGCT  
TTGAAATCTTCCCGCGTTGATCCCATAATCCTCGCTGGGCTCCTCGTAGTGCTTTACCCAGT  
AGTGGCAAACCGTGTATTTTCTTTGTCCTTTGCATCCGGTATTCCGATTGTTCTTTCGCTCCA  
CATGGTTTACGCCTCCTTTACCGTCATCTTGAAAGCCGGGATCAGGGCGCGGTCGTCGCTTCC  
GAAGTGGGTGTAGCGCTCCTTACTCTGACGATGCCGTCCAAGGTGCAGCCGAGCTCCTCGA  
AGCGGGCGATGGTCTCGATCAGGCTGGAGAAGGTGGAGCTTATCGTGAATTCCTTCACTCCC  
AGCTTCTGACGTCGAAAGGATCGTCTCGATGTCGTGTCGCCAAATGACCTCGGCGAAGTT  
CGGCAGGTCGTTTCCGGCTTCTTGTCTGTAAGGTAGGCCTGTCCGAGTGTCCAGTGGC  
CGATCTCGTCCCATTTCATTCCGGGCTTTGCGTTCTCAATGGCTTCGATTGTGTACTTCATGGT  
GGTTTCTCCTTGTCTGTGTTCTTTTGGTATGTACATATATCACTCTGAACGCCTGTAATAG  
CAAGTTAATTCGGAGAATATATGTGACAATCCTGCGGGAATATCCGAGGCCGTAATTGTGTA  
GTTTACGCCTCGCCGGTCCAGGATAAATTTTGCATTTCTGACCGGTGATCCTCAAGGTAGAG  
AACCAGCTCGTAGAAGTCTCTCTCGTAGGCCAGCCGCTGGACGGCGGTGACATCAAACATAT  
TCGTGAGGCCGGTGTCCCGGATGGCGAGGATCTGCTCTTTTACTTTTTTCATCCATCTTAGTCC  
ACCACCTTCTGACAAAGTCGATGCCGTAGATCACGTTCCAGGCCGACCCGTTATCCCAGTT  
CACCATAAGGCTTCCGGTATCATCGACACCCGTAACCGTTCCTTTGGTGCCAATGGGTGGAG  
CATGCACATCGTCCATCTGAAGAAGCTCCACGCGGGTGCCTGCCGGGTAGCGCAGGCGGAG  
CGCTTCAAGCTCGTGCTGCTTTATCATTTCGATGCCGCCACCTCCTTTCCGGTGCGCCGTT  
TTCCAGCTGGAGTTGCCGGAAGGTTCTGAAGGAGAATCTTGCCTCGGCCTTGTACTCGTT  
TCCGATGAAGCCAAGCCGACAGGAGGAAGCAGCGGAAGGCGTATTTCTCGTTGTCGACTTCT  
TCTCGGTGGCGCTTACCCGCTTCAAATCCTTACTCATCTTGCAAAGGGCTGCGATGAAGTGG  
GTGTAAGCCTTACTGCTTCCGGCTCCGGCAGTTCGGAAAACCAAGGGAAGGTGACCTTATC  
CTCTGTGATCTCGATGCCGAGATCGTCAATGCCGAGTGCCTTCTTGATGAGGCTTTCTTGGC  
GGTTAGGAGGTTGGTGAGGTTCCGACCGCAGCCTTCTCCAGCGGGAGGCTGACCGTGAGGC  
CGGTGCCTTCGTCCGCTTCCGGTTCCTCTGCGGTGGCTTCTCGTCCGGTGCCTTCGATTTCTC

AGCCGGAGTGAAGCCGTCCGCGATGAGGTTGTGGATCAGGCGCTCCAGCTTGTCCGCGTCCT  
CGCAGGTGACGCCGCTTCCTTGTGCGACCGTGATGTCGCCGATCTCGAAGGCGCAGGTGGGC  
ATGAACTTGTAGACTGCCTTGTGCGCCGGTGAGCTCTGCGATGGCTGCGACCAGTGCTTTTTCTT  
TCTTTTCCGGTTACGTTGTAGTTTGCTTTCATTGTGTGTACCTCCGTTTTTCAAATGTGGTTTT  
TGGCTGTGCCTTTTGGCATGTATATACATCACTCTGAAAGCCTTATATAGCAAGCGTTTTCTC  
GATATTTCAAAGGAATATAATCGACAAATATACAGGGCAGAAATTGTGTACTATACACCCGC  
CGTCGGAGAGGTCTCGACCTCTTTTGCCAGAGCGGAGTAGTAGAGCTTTTCGCCGTTTCTTAC  
TACATACACATTTTCCGTATCGCCAGTATCCTCCACATAGCGCCGGAGGATGACAGAGGCGT  
ATTTCCGATCAAGCTCCATCATGCAGCAGATACGGTTGAGCTGTTTCGCAGGCCATGAGCGTG  
GAGCCGGAGCCGCCAAATGTATCAATGACCACAGAATTCTCCTGAGAGGAGTTCTTTATAGG  
ATAGCCCAGAAGATCCAGCGGTTTGCTGGTCGGGTGATCCTTATTACGCTTTGGTTTGTGATA  
GTTCCAGATGGTCGTCTGCTTTCTGTGCGAATACCACGGGTGTTTGCCGTTTTGCAAAAATCC  
GTAGAGCACCGGCTCATGCTGCCACTGATAATCGGAGCGACCGAGCACGAGGCTGTTCTTTA  
CCCAGATACACACACCGGCGAGATGGAAGCCTGCGTCAATGAATGCCTTCTAAAGGTGAG  
GCCTTCGGTGTCTGCATGGAAGCAGTAGGCCGCTCCGCCTTTTTTCGAGGTGGTCAGCCATGT  
TCTTGAATGCCGCCAGAAGGAAGTTGTAATAATTCCTCGCCCTTTAAGGAGTCGTTCTGGATC  
GTCAGACCGTCCGAGGCTTTGAAGGATACGCCGTAAGGAGGATCGGTCAGGATGAGGTTTG  
CTTTCTTGCCGTCCATGAGCTTTTCCACATCTTCCGGAGAAGTGGCGTCGCCACACATGAGGC  
GGTGCCTGCCGACTGTCCAGATGTCGCCGGGCTCCACGAAGGAAGCCTTCTCAAAGCGGA  
AGTCAGGTCAAAGTCGTCATCGGCGATGTCCTTTTCGTTTTTCGGTGCCGAGGAGCTTGTCGA  
GTTACCCGGCATCAAAGCCAAGGAGCGAGAGGTCAAAGGACTGATCCTGCAGGTCCGATAA  
TTCGACCGACAGCATTTCCTCATCCATCCGGCATTGAGCGCCAGCTGATTATCCGCAAGGA  
TATATGCTCGCTTCTGGGCTTCCGTCAGGTTCTCGGCAAAGACGCAGGGCACGTTTTTCATAG  
CCTTCCTCGCGGGCAGCCTGTACACGTCCGTGTCCGACGAGGATGTTATAGTCCGCGTCAAT  
GACCGCAGGGCTAACAAAGCCAAACTCCCGAAGGGAAGCTCTAAGCTGCGCGATCTGTTCC  
TTGGAATGCGTTCTGGCGTTCCGGGCGTAGGGTACCAGCTTATCTATAGGTACCTGTTCAA  
TCTTTCTGTATTCATTTACATGTTCTCCTGCTTCGAAGCAGCTGCTCCATCACGCTGTCCTGC  
GGACTGCCTTCAAATGGCTCGGTGCAGTTCTGCTTTACAATGTCGTAAATCTCATAACCAGAG  
CAGGTTGGCCTGCTTCTGGAAATTAAGAGAGAGCTGCACGAATGGACTCGCAATCGCAGCTC  
CCGTAGTCGGGTGTTTTCCGAGCAGGCCGTATTTGCTGACCGCCTCGGAGCACTGAATATAT  
CTGGCAAAGGCCTCGGAGTAGCTTTCGAGTAGGCGCTTGTTTACGAGCCTGTGCGCAGCCGCG  
CTCCTTGAGCCACAGCCATGTTTCCCTTATAGATTTATCTGCGCCAGCGGCTTGCCGTCCTT  
CTGCTGTGCAGATAGGTAGTCGTCCGGGCTTGGCATATCCATGCCTTCGAGCTCCACGCCGT  
CACCGATGTTCTCTGTATCGAGGTCAGTTAAGTCGTCTGTGAAGTCGGGAAGCTCCATGCGC  
CTTGCCGGTGCTCCTCTTGTGATTTTGTGCGGCGAGGGCGTCAGGTTGGAGCCTGCTTTTACA  
CGCCGCCCGCCGCGATTGGTTCGGTCTTTTGCCACGTCAATCACTCCTTGTCTTATCGGGCTG  
GGTTTAATACCCCGTTTGAATTGCAATTTTTGCGAAGAAGACCCCGCGCCGTTTTCCGGGAA  
AACAGGTTCGTAGAGATTTACCCGCCCTACCGGTCGCCGCGCTCGTGGTGAATCTTCTCGTG  
GCACGAACGACAAAGGCTCATGAGATTGGACTCCTCGTTCGTTCCCTCCGTCAGCAAGAGGAA  
TGATGTGGTGGACTTCCTCGACCGCGACGTAGCGTCCGGCCTTTAAGCACTGCTCACAGAGC  
GGGTGCTTGTGGACATACCTGTCACGGATTTCGTTTCCAAGCTCTGCCGTAGCGTTTGCCGGG  
AGAGTAGCCGCGCTGGAAGTTCTCGTAGTGTGTTCCATCACCTTGGCGTGCTCCTCGCAGTA  
AGCACCGTCGGTCAGGTTCCGGCAGCCGGGAAAGCGGCACGGTCGTTTTGGTTTCTTGGCA  
TAAGCCGCGCCTCCTTTCCGGGCAAAGAAAAAGCCCTGCAGGATAATCCACAAGGCTTGGT  
GGCTGCGCGTGACAGCCGTTTCTTTATTCTGTTTTCGCTGATTATATACTATCATAAGTGGCAGG  
TGGGCATCTTAGGACAAATATGGACATTTCCGGGCGCATTTTCATATTTTCGATAGGATTTTTCAG  
GGAGAGATGCATGCAGCAGTGCCTTCCGTGCCAGCGCCGGATGGTGCGGGCATCTGCACA

AAGCTCGGTGCCGATCTGCTCCCATGTATAGTTGTGGATGTAACGGTACTTCAAACCCATGC  
GCTCGTCGGTGTCCGGAAGTGCCTCGATCACTTCCCGGATCTGCTTTTTTCAGGTCGGAAAGC  
ATCTCAAGCTCCCGTGCAATCTTTGTTCCAAGTCCCAGAGCTTTTCAAGCGTCCGGGCAA  
GGGAGCCTCGGTGTTCTTGAAGTCTGCACCCGGTCTTATCATATTGGATAGCCGACACGC  
TGCCCGCCATCTCACGAAGTTCTGGGCTTCCATCGTATCGGACTTGATTCTCTGATCAAGGC  
GGTAGGCCTGATGGAGATATTCTTTTACTGTCATTTAGGCTTAGCCTCCTCTCGTAGTTTTGT  
GATTAGGTACTCGCCGTCCACGCTCGTTAGGGTCTTGTACCAGCCGGAGCGGAAGAAGCGCT  
CGCATTCCAGCGCGTCTGCCATCGCGGCCTTGTGCGGACTTCTTTTTTCAGGCGCTTCAGGG  
CGTTGCGGTAATCCTTACAGGCCTGCAGCACGATTGCGTTTGCAGGATTTTCATAAGGATCG  
CTCATCACACCACCTCGGCTTTGACCGCGTTCGATCAGTGCCGACTGTGTGAGTTCTTTCTTGG  
TGAGTGCCCGCATGATCCGCTCATCAATGGTGCCCTTTGTGATGATGTGCTGGATCACCACG  
GTATGGGACTCTTGGCCTTGCCTCCAGAGGCGGGCGTTGGTCTGCTGGTAGAGTTCCAGCGA  
CCATGTGAGCCCGAACCATAACAAGGGTGGAGCCTCCGGCCTGAAGGTTTAGGCCATGACCG  
GCAGAGGCCGGATGTATGACTGCTACAGGAATCTTTCCCGCATTCCAGTCAGCGATATCGCG  
GCTTGTCTTGATCTCCCGAACATTGAAGCGGTTCTTTATGCGGGATAAGTCGTGCCGGAACC  
AGTAGGCTACAAGGAGCGGTTTTTTCATTGGCGGCCTCGATAAATCCTCCAAAGCGTCCAGC  
TTTTCTGTCGTGAAACTCGATGATTTCTCCGGTATCCGCATAAATCGCACCATTTGGCCAGCTGG  
GAGAGCTTCCCGGTGAGGGATGCTGCATTGGCAGCGGTGACTTCGCCGTCTGGGAGCTGCAG  
GATGAACTCCTGCTTCAAATCCTCGTAGCGGTCACGCTCCGATTCCGAAAGCTGCACCTCAT  
AGGCCGTGGATACCAGCTCCGGCATCTTAAAGTGGTCCGGTCGATTTTCATGGAAATCGTGATA  
TCCGAGATTTTCCGGTAAATCGCGTCCCTCCGCATAGAGCAGCGGCTTGTAGGAGTAGATGAT  
CTCGCCGTTTTCGCTTGTCCGGCATGAAGTAATTTGTCCGGTATTGTGTGATGAAGCGTCCGAG  
GCGCTCACCCATATCCAGCACTTTGAACTCTGCCACAGATCCATGAGACCGTTGGAGGAAG  
GTGTGCCGGTGAGGCCGATAATGCGATGGAGTCTGGGTCTAACCTTCATCAGAGACTTGAAG  
CGCTTTGACTTGTGGTTTTTGAAGGACGATAGCTCGTCGATAATCACCATATCGTAGTCAA  
GGGAAAGCCGGACTCGTCAATGAGCCACTGCAGGTTTTTCGCGGTTGATGATCGTGATGTCCG  
CTTGCTGCATAAGTGCTGCTTTTCGCTCCTTGGCAGTCCCGACTGCGACCGAAAAGGTTAGA  
CCCGCAAGGTGACTCCATTTCTGGATTTCCGAAGGCCAAGTATCACGGGCGACTCGTAAGGG  
AGCGACCACAGAACGCGCCGTACCTCGAAGCTGTCAAACAAGAGATCATATACAGCAGTC  
AGGGAGATACCGTTTTTGCCAAGTCCCATATCTAAAAGGACAGCGGCCACGGGATGCTTTTT  
GATGTAGCGGATGGCATAGTCCTGATAATCATGTGGCGTGAAGTTCATCAAGCATCCCTCCA  
ATCTGTGAGATATCGTCAATGACGTAAACCTTGAATCCCAGCTCCCGAAGAAGTCGGTGTCT  
TGCCAGCTGGAGCGGGCGCGTTTTCTTTCCCGGAGCCTTTAGCTCCGCAAAGCCATAACAC  
CTCCCGGAAGAAGGACAAGCCTGTCCGGCATCCCGTCAAAGCCCGGAGAGACGAACCTGGG  
CGCGATGCCTCCCATGATTTCACTGCATTTATCAGCTTTTTCTCAATTGTCTTTTCATCTATT  
TTCATTTCCATTCATCTCCTTTGAGTGGACAAGGTGGAACAAGCGGACAGCTTTTTTCTATAT  
TTATCTACGCGGGTGTGCGCAGGTGCCTGTGTGGCCTCCTTTTTCTGTTTTGCCGGATTAAT  
AAAGGGAAAAAGTTGTCCTTGTCCACGAGGTTGTCCACCTATGTTGTGCGTTCGTACAATCG  
CTGACGTCCGTAAAGAGGCTGGGAAGCCCTGCGATTGGTACGCTTCCAGCCGTCCACCTGTG  
TCATAAGTGCCCGCATGGCATAAAGAGTCGGTGGGCTTTAAGTCAGCGATATTCTTCCGAAG  
CATTACACCAGATTTCCGCATTGCTGACCTCGGTGCGTTCCACGGTGCCGGAATCAGATGT  
GATGTCATCACCGTCAAGGAAATTCGACGCTGGTAGAGATCCATCTCAGACCAGTTTTCCG  
GCAGGAGCTTTGACAGGTACTGTTCCACGAGGCCTTGGCGCTCGTCTGTTTTCCATAGCGCTTC  
TCTGGGCTTCTTCACTTCCGCAAGAAGGTCACCTTCGAGATACAGCTTTTTCGCCTTGCTCGT  
AGTAATACTTGGCCTCCGCCATATCTGGTACGTTCTTCGGGCGTGATTTTCCAGCGCACGG  
CATTTTCCGTCTGGCGACATTTACAATCCAGAAGCGCCGGTTTTCCGGTGATATCACGGAGG  
TATCCATGCTCGCCGTTGACCGTAGCGACCACAACACACTGCCTCCGATGACTTTTCGACCAC



CTTGCCGTAGCTGGGACGGTACTTATCATCTGAAGTGGAGAGGAAGGACTTGACCTTCTCGA  
TGTCGGCCTTTTTTCATTCCGGCCAGTTCGCCGATTTCAATGATCCAGAAGCCCTGCAGCTTTT  
CCGCACCGGACTTGTTCGTCCATGTTCAGTAAGCGAAAGGGCGTTCGGAGAAATATTCATCACCG  
GCAAGAGACTTCCACATGGTGCTCTTGCCGATACCCTGTGCGCCGTCAAGGACGGGAACGGT  
ATCGAACTTGGTGCCGGGATGGTAGATGCGGGTCACGGCGGCCACTAAGGTTTTTCTGGTGA  
CTGCCCGGACATACTTCGTGTCATCTGCCTGCAGGCAGCGGATAAAGAGCTCGTCCACGCGA  
GGCACCTGATCCCATTTTCGGCAGGTTCGTTAAGTAGTTCCTCACGGGATGGAACCGGCGGTC  
GTCTGCCACTTTTCGTAAAGCTGACATTGTGGTTTCTGTTCAGAGAAGCAGACATAGCGGATGT  
CGATCAGGGCTTTTCAGCTGCGCCGTATCGGCATCGCGCCAGAACTTATTGTCAGCGGGACGA  
TCCAAGGAACATCGCCGATCACCTGTATGCGGTTGGCCATCTCGTTATAGGCAAAGCCCTG  
ACAATCCGGATCGTTATTCAAGATCAGCATCTCGTTCCAGACGCTGTTCTGAAGGACGGTGC  
TGCGGGACTGATATTGGAGCTTGGCTTTCCAGTCATCATCGGAGCCGTCGTCTGTAGCGGCA  
AACTCCTCACCGGCTGCGCCTGCTTCTCCGAAAGCAGCAGGATTTTCACCTTGTTCGCAGCC  
GGAGGCAAAGTCCATCATGGCCTTATAGGACGGCATCTTCGACGAGGTTGACTCATCCAGCA  
CATCCTTGTCCAGATCGCTGAAGCGGTGGACGCGGACAAGGTCAAAGCATTTCAGGAGCTTT  
TTGCAGGCAGGGTCTGAGGAGTGATGCGAATACAAAACTTATCTCCGTAGGAAACGGCAC  
CGGCGGGACTGTCCGCAGGGATATAGTCGTAGCGGTTCTCGTCATCGGTTCGGAGCATATACA  
TCGGAGAGGAACTCCGGGATTACCTCCGAGATCGGATAAGCCCGGCAGAACGCACCGATGA  
TTCCCGGCTTGGCAAGAGGATCAGCCTGCTTGTGCTGGCACCGTGATCTTCCACGCAGGACTCA  
CGGGAGGATAACCGCCATGTGCTGGAGTCCTGCCAGTCATCGTATTTGGCAAAGGTAGGCATC  
CGGGTCTAAGGCGTCGCCGTCCTTTTCCCTGAATACATACTCGCCGTTGACGGAAGTGGAAG  
GCCAGTACATGAGGCGGTTGGCCTCATAGGTGCTGTTCGTCGAACATATCAATGCCGACTTCC  
TTGGCGAACATTCTGGCGACTGGCTCATATTCGGGCTCGCTGATCTCGCGGGTGAGCGGGAT  
TACCAGACGGAGCCTCGGATTTTCCGGTGTATGCTTATGCGTCGAGTGGCACAGGCACTGGT  
ACGGGATTTTGTGCTGATGGTGGTATCCACACATCCGGCTCGCCGTAGTCCATGTTCGAGAGTC  
AGCATGGAGCGGCAAAGCACATATCCCTTTTTACGGCGACCGTTCCGAAGATGCCCGCCAC  
GAAACCGCCGATGTCTTTGATGTCTGCCTGCTGGGCTTTGGACATCTTGCGGTATTCCCTCAAT  
GGTCTCCGTGGTGCAGGCGGTGTTCTGGAATCTGGCCTTTAAGGCATCCATCGAAGTGTCCG  
CGTTTTTCCATTTGATAGCCTTGCGGCTATTGGCGGTGGCGTATTTTCAT

>KB1/TCE-0

ATGACACTATACTATCAGGACGACTTTGTTCAGTATTTTCAACGGTAACTGCATTGAAATCCT  
AAAAGAACTCCCCTCGAAAAGCATAGACCTCGTAATAACTGACCCGCTTACGGTATAGATT  
TTCACGGCCGTGGCAAAGGTGCAGAAAAGATAGCCAACGATAAGTCCTTTGACAATGTAGC  
CCAGCTGATTCAACAGGTTATCCCGGAGCTGGTCCGGCTTCTGAAGGATGATGCCGAAATCT  
ACTGGTTCTGCTCAGGTGGTAGCCAGAAGCCTCTTATAGCTCAGGTCTGGCTGGAATTCATA  
AAACTCAAACCACAGGTAGTCGTTAAGAACCTCATAATCTGGGATAAGTTATAACCCGGCCT  
CGGCTGGGACTGGCGCTTCCAGTATGAAACCATCTTTCAACTCTATAAGGGCAAAGGCATCA  
AATCAGAAGGCCACTGCCGGGGTAATGTGATATCCGCCCCTAAAGTAATAACCAAATTCGG  
CGAACACCCCCTCCAAAAGTCCGGATATCATAGAGAAGCTTTTGCTACCCAAATCAAAGC  
CCGGTGTGTTATACTCGACCCTTTCCTGGGCGGTGGTACAACAGCCGCGGTTGCCAAGAAA  
CATGGCCGTCCTGCATTGGAATAGAACTAATAGACAAATACTGCGAGTTTGCAGCCGAAA  
GATGCCGGGGCATAACATAACAATAATTTAATGATTAACCCCAAGACGATTGCCAAGGTGTT  
TAAGGCGTTTCGCCAACATCTTCCATTTCTTCGCCCAAGGTCATCCTATGATCTTCTGTTCCCT  
GAAAATAAAATATAAAATAACAACCTGCTACTGTCAATAAAGCGGCGATTATCACAATGTGC  
CCAAGAACAAAATTCCAAAAACCTCACCCTGCGATTAGCGATAAAAACCGTAGCAACAA  
CGAAAAATATGCAAGCAAGAATAGTCGCAATTGATAGATGAATACGTCTTGTAAAGACCAG

AACTGACGGAATAGCAATAACAAGGATATAAAGACCAATCCACCACCACAACATACTGTTA  
TCCTCCCTTTAGAGCTTTTTAGATTATCCGCCAAGAGGCATAGTTACGCAATAAGTTTTGTTA  
TATTTATAAATTTGAGGCAGTTATGCCATATAAGCTACCGCATCCATGTGCCACCCCGGGT  
GTCCGGAACCTAACTCTAAAAAGATACTGCCCCATCATCATCATGAGCAACAAGGGGTACCC  
CCTCAAGAACAGTTAAAGAAATCCCAATACGATAAGGACAGAGGCAGTGCTTCCAAGCGAG  
GGTATGGGAGGCAATGGCAAGCGATACGTATATGCAAATTGAAACAAGACCCCTATGCTC  
TGATTGTTTGGGGGCGGGGTTGGTGGTGGCGGCCACTGATGTAGACCACATAGATGGTAATG  
TACACAACCTTGTGAGTGAATAACCTTCGTTCCCTCTGCCACGCCTGTCATAGCCGCAAGACT  
ATTAGAGAAAACCTACGGATTTGGAAATAAACCTCGATAATCTAAATGTAGAACCACAGG  
GGCAGGGGGAGTCAATTCTCTACAGCTTAAAACACGGAGACCGCAGGCCGAACCTTCGCGC  
AAGAATTCGGGAAATTCGAAAATCGGAAATGAAATATGACAACAAGAGGTAGAAAACCCA  
AACCGACTAAAATACACGAGTTAAACGGCAATCCTTCTCGTCTCAATTTGGGAAAAAGAAA  
AGAGAAGGAAATCAAACCATCTACTGGTGCGCCCACTTGTCCATCATGGCTTGATACCGAAG  
CAAACGAGAATGGAAAAGAATTGTTCCGGAACCTTGCCAAATTGGGCGTTATTACCATGATT  
GATAGAGCAGCCTTGGCTGGTTATTGCGTAGCGTACAGCCGATGGCGTACTGCCGAAGAAG  
AATTGGGCAAGGGCTTTACCTACGAATATTATGATTCAAAAACGTTTCAACTCAAGCGTACT  
GTAAAGCCAGAAGTGCAAATTGCCCGTAACTCGCTCAATCAAGTCAAGGCGTTCTGCTCTGA  
ATTCGGATTGACGCCTTCCTCGCGCAGCAGACTAGTACTGCCGGGTGAACCGAAGGACGAA  
GACCCTGTAGACAAAATGTTAAAAGAGGCTGGCTTATAGATGAATGATTATCAATCAAGAC  
GCGGTAAACAGGGCACTCACATTTATAGAGAACCTGAAACATACCAAGGGAGAATGGGCAG  
GCCAGCCATTCAAACCTCATGGCATGGCAAAAAGATATAGTAACTCGGCTCTTTGGAACCCTT  
AACCTGATGGCACAAGGCAGTATCGTACATGCTATATAGAAGTACCCCGAAAAAATGGAA  
AATCAACTTTGGCTGCTGCTATTGCCAATTACCTCTTGTGTTGCTGACGGTGAAGCCGGTGCTG  
AAATCTACTCGGCTGCAGCTGACCGGGGACAGGCTTCCCTGGTATTTAATGAAGCCGCTCAC  
ATGGTTTCGCACCCACCCTGCACTTCTATCCCGGTCTAAAGTGCTAGACAGTGTTAAACGCAT  
AATCATACCCAGAAACAACCTCGTTCTATCAAACCCTCTCAGCTGAAGCATATACCAAGCATG  
GTCTTAATGCTCACGGTATCATATTTGACGAACTGCACACTCAGAAAAATAGGGAGCTCTGG  
GATGTACTCACTACTTCAGGTGGTACCAGACGGCAACCATTAAACAGTCGCCATTACCACTGC  
TGGAGTTGACCGCAATAGCATCTGCTGGGAACTACATGACTACGCCCAGAAGATATTAAGTG  
GAATAGTTGAAGACGATAACATTCCTGCCAGTTATCTATGCGGCAACTGACGATGACAATTGG  
GAAGACGAGTCTGTCTGGTACAAAGCAAACCCGGGGCTTGGTGAATTCCGCTCTATTGATGA  
AATGAAGCAGATGTACCGGCGGGCAAAAAGAAACCCAGCCCTTGAAATGACCTTTCGCCAA  
CTCTATCTGAACCAGTGGGTATCATCATACGAGCGTTGGCTCCCTATGGATAAATGGGACAC  
ATGCGGTGCGCCCTTTGCCCTGAAAGAATTGGACGGGCAGGATTGTTATGCTGGGTTAGATC  
TGGCCAGTACCACAGACCTGACCGCTCTAGTCCTAGTATCCCGAATGGAGAAGGCGGATTT  
CAAGTCATACCGCACTTCTGGATACCTCTTGATAACATCCATGAGGCGGCCAAACGCGACAG  
GGTCCCTATCCGCTATGGTAAAACAGGGATTAATCCATGCAACAGCCGGCAACATCATCG  
ACTACACTGCCGTTGAAGCCACTATTGACGAGTTGGCAGAGATATACCACATCAGAGAAATT  
GCCTTTGATAACTGGAACGCCTGCCGGCTAAGCCAGGACCTTACGGATAAAGGGCTATACCAT  
GGTCCCTTTCTCTCAGAGCGTTAAAAACATGTCACCGCCCACCAAAGAATTAATGAACATCA  
CTCTGAGCGGAAAACCTTAAACACGGCGGGCATCCAGTGTTGCGCTGGAATGCAGACAATAT  
GATGGTCTATCGAGACTCTAACGATAACCTCAAGCCTAACAAACAAAAGCCACTGGGAGA  
ATAGACGGCATGGTTGCACTAATCATGGCCCTCGATAGAGCAATTAACACGAAAATATTAC  
GCCTCACTCAGTCTATGAAAATCGTGGCGTCATTTTCAATTTGACCTTTAACCACTGACTATTAT  
CCCAGGAGGACTATATGGCTAACCTATATTCAGGGTAAAACAGCTATTGTCTGGTATAAC  
CCGCCGCTCTGAAGGCGTAAACATCACCGACCCACGATATTGGAACCATTATGCTATGGCAT  
ACTCCGGAGTGAACGTCACAGAGCAAACCTCCCTAAGAGTCACAGCCGTCTGGTCATCTGTA

AGGCTCTTGTCGTGGACATTGGCAGGACTACCTCTCGTTGTGTACCAGCGTATGGAACGAGG  
TAAACAAAGAGCTGGGGGTATTAATCTTCATAAGCTTCTCCACGATAGCCCCAACCCCGAAC  
AAACCTCTTTACATTCCGTTCCCTTACTTCAAACCTCACCTACTACTCTGGGGCAATGGTTATG  
CAGAAATTGAATTTGATAACTGGGGTAATCCGGTGGGCCTCTGGCCTATACCACCCTGGCAT  
TGTGAACCGTCTCGAACACAATCAAAAGAAGTGTATTACAAAGTCACCTTACCGGATGGACA  
AATAAAAATATACCTCCATACCGAATGCTCCATTTTATGGGATTGACTACTGATGGAGTAC  
ATGGTTTGTCCCCATCGCATATGCCAGAGAAGCTATCGGGCTTTCACTTTCAGCAGAGGAA  
TTCGGTTCAAGGTTTTTTGGGCAAGGGACTAATATCGGTGGATTTTTTACCACCCTGGTCAA  
CTAAACGATAAGACCCGAGCTAACCTGACAAAAACCCTCGCTGAAGGTTATGAAGGTTTATC  
TAAAGCCCACAGAGCTATTTTACTTGAGGAGGGTATGAAATTTGAAAAAATTGGTATCCCTC  
CTGAAGATGCACAGTTTCTTGAGCTCAGGCAATTTAGGTAACCGATATCGCTCGAATATTC  
AACGTACCTCCTCACATGATAGGAGACCTCTCAAAGGCAACATTCTCAAACATCGAGCATCA  
GGCCATAGAATTTGTGGTTCACACCATGAGGCCGTGGTTCGTGAATTGGGAACAGGAAATCA  
ACCGCAAGCTCATGTGGACGCTCGGCCGATGATTACTTCGCTGAATTCGTAGTTGACGGCCTC  
CTGCGGGGGGATACAAAGAGCCGCTACGAGTCTACGCTATCGGCAGACAATGGGGCTGGT  
TATCTGCAAACGATATCCGGTCACTTGAAAATATGAACCCGATTAAGGGTGGAGATGAATAC  
CTTGTCCCCTTGAATATGATACCAGCTGGCACGCCATTAAAAGAGCCTGATCAGAAAACAAG  
TAACAATCGCTCCGTAATTGCGGCCGTCATCTCTCAGATTGCTGAGCGAGAAACAATCAAAC  
TCGCACGAGCAGTTAAAAAATACTCTGGCCAAACCCTGACTCAATGGATAGACGACTACTAC  
CGAGACTTGCCAGATTACATCGCGGTGAAATTTGCATGCAGTGGACTTAGACTACCAGAGGA  
ATATGTCAGTGAATTCACCCGTCGGTATGTTGAAGATTCTAAAAGCCAGATTACCACGGCCA  
CTGAGACTAATTCTTTAGCAATGTTAATTGACACATGGAAGATAAACAGATGCCAAGTTATA  
ACAAACACCGAAACAGCATTATTGGAGGATTGGTATGCCTAAACTAAACCCGAATATGTA  
ACCCGTAGTTACGATGTAACCGAACTCAGGGCAGAGGCTGACTCCGAAGGCACTCCCAAGA  
TTAAAGGCCATGCCGCTGTCTTTAACAAACAAGCGTTGCCTTAGTGGGATTTTCGCGAGCAA  
ATTCTGCCTGGCGCATTTGCGAAAACAATTACGAAATCAGATATTCGAGCACTCTGGAATCA  
TGACCCAAACTATGTACTGGGGAGAAATAAGAGCGATACTCTCCGTTTAGTCGAGGATGAA  
AAAGGCCTTTCAATTGAAATTGACCCGCCGGATACTCAGTGGGCCAGGGATCTAATGGTATC  
CATCAAACGCGGTGACGTCTCGAAATGTCATTTCGGATTCCATGTGATTAAGACCACTGGG  
ATAATGATAACAGCCTCCGAACACTGGTTGAGGTAGAAGTGTGATGTGTCACCGGTGACT  
TACCCTGCATATCCTCAGACAGATGTATCTGTCCGGTCAGCCCTGACAGAAGCAGGCATAGA  
CTATAACAACCTGTCTACCATCATCACCCGAACCAGCCATCAAATACCCCTCACCCAAACTG  
ATTATGACAACCTTGAATACTGCTATTAACGTACTAAGGAGTTATTTGCCAAAGAGGAAACAT  
CCGTTCAACCGGGCTCTCGCACTGACGGGTGTGTGGCTGAGGTGGAATACTCCGCCGGCA  
ATTAGAACTCGTAAAGTACGGATAGATATTAACCTAAATTAAGGAGAATACTCAAATGA  
CCAATGTTGAAACCCTAAACAAACGCAAGGCTGAATTGATTGCTCAATCTGAAGCCCTATTA  
GCTCTGGCAACTAAAGAAACCCGGGGATTGACCGACAAGGAACGGGAAGACGCTGATAAGC  
TAATGGGTGACATCAAATCCTTGGGTGATCTCATTACCCGCACTGTGGAACCTTCAGCAAATG  
GAGATGTCTGTCGGTAAATCTGACAACAACCCACCAATGAGACTGGATTCCGTAACCTTCGG  
CGAGTTCATTACGGCAGCCATCGCCAATCCTCGTGATTCTCGCCTTACCCGAGCCCAGACCA  
CGGGTGC GGCTGCTGACGGTGGCGTACTTGTACCTCCGCAGTATCTAGATGAACTTCTGGCA  
GTCAAGCCCGCGGATGGTATTTTCCGCCCTCGTGCCCGGGTTATCCCTGCTGACAGTGCCCA  
GCCTGATGCATCAATATCCATGCCTGCCATTGACCACTCCGGTTCTTACGGCGTTTATGGGGG  
TGTAACCTGTCAGCTGGATATCTGAAGGTGGCACTAAACCAGAACTGGCATGAAATTCAAA  
GAAATCACCTCAACCCAGCGAAGTCGCTGCGTATATTCCGGTAACTGATCGCTTGCTGAG  
GAATGCGCCCAAGGTTTCTGCTACTCTGACTGGTATGCTCAGATCAGCCATTATCGGTAGCG  
AAGACTATGCTTTCTTGC GCGTAATGGTGTAGGAAAACCCACCGGAATTATCGGGCATGCT

TCCACCAAGACTATTACCCGTACCACCAGTAGTGATGTTGTGTTTCGCTGATATCCGTAATATG  
TTCGCTGCCTGTCTTTTTGGTGGCCGCTATCTTTGGATTGCCTCTCAGACAATCCTGCCTAAA  
CTGATGACCATGAAAGATGAGGCGAACAACCTCATCTGGCTGCCGAATGCAGTTGATGGAC  
TACCCGGCAGTCTGCTCGGCATCCCTGTATTTATTAACCCTCGCAGTCCGGTCTTGGTAGTG  
CGGGAGACCTCGTACTGGTGGACCTGGAATATTACCTGATTAAGGATGGATTTCGGCATAGCT  
GTTGAGGCTAGCAATGCCCCCTTGTTTACCAGCAACAAAACCGTCATCAAGGCTTACCGAAC  
TGTGGATGGACAACCGTGGCTTACTGCCCTGTCCAGTTGGAGGATGGAACCTACCACTGTGA  
GCCCCTTTGTAGTACTCCAATAAACAACAACACTGGGGGTGGAATTACCGCCCCCAGTGAC  
TAACAAAGAGAGGAATTGAATGAGGTTAACTGATAAAACCAAAATTGATATTGGTCTGGTA  
CCCCAGGCTCTTAATAACACCAATGCAACTGGTGCTTATTACAAATTAAGCGGGTACGGTCT  
GGTGTCTGGTTTTACTGGTAGTAGGTGCAATGGCAGCCACTAAAACCGCTATCGTTGAATTAT  
TGCAAGCTAAATCTGCTACAGGCACTGATGCCAAAGGGATACCGACCACTGCAGGTCAGTT  
GGCCAAGGCTACAATCACAGCTAACACCGAGGTAGTAGCCGGCACCATAGACCTGGCATCG  
GTCGCAAATACTGATGTTATTACCATCAACGGCGTTAGTTTTACTAAGGCGGGCCGCTACCGA  
TACTACTAAACAAGAATTTGCAGATGCGGCAGGGCTGGTAGCTTGTATCAACCATGCCACCT  
ATGGCGTACCTGGGGTAACTGCCAGTGCGGCAAGTGCAGTAGTCACTGTCACAGCCACTAAC  
CCCGGAGATACTCTGGTAACTCTGGATAAAACAGAGAATGCCGGTACTGTTACCCTGGCAAC  
TACAAAAGCCATCGCCTATGTTGAAGTGAATACCGACGGTCTCGACCATAACAATGGATTCA  
TTTATGTAGCTGCGAAAGTCACAACCACAGCTAACACTGTGGCCTCTATTGCCACAATCCGG  
GGAGATGCTGAGGTTACACCTACCCAGGTTGTCTCAGCCTCTGCCCACTATTAAGCTTAATC  
GCCGGGGGGTGGCAATTCCTTCTACTCCCCGGCGGGAGTCAATCATGCATAAAAATATTCTG  
TTTGAACAACCAACCTTTATCCAGATGAAACTGCAATGCTGGTGCACATCAGTATCAAGCG  
AGGTATTAAGATGGCCTTAAAAATAATAACTGCCCCACCGTAGAACCTGTGAATTTGGCA  
GAGACCAAAATACACCTCAGAGTCGACAGTTCAACCGAAGACAATTATATAAATTCACTGA  
TTAAATCCGCCCCGGAAGCAGTAGAAAACCTCACTGGTCGAGCACTCATCACCCAGACGTTA  
GAATATCTAATCAGCAATTGGCCAAACCATGAAATCAAGCTTCCTCGCGCGCCTTTACAATC  
GGTAACCAATATTAATAACACCGACAGTGCAGGGAATGAATATATACTTGACGTCTCAAAAT  
ACGTCTGTAACCCCTGATACCGAACCGGGACTAATCGTACCGGCTATCGGTTACAGCTGGCCA  
TCAATTAGTCTGAGACCCACTGGTGCTATCACCATCAACTATATTGCCGGATATCCTCCATCA  
AATAGTGAACCTCCCTGACTATCAGGCAAACGTACCTGCTGGCCTTAAACATGCAATATTGCT  
ACTGGTGGGGCACTGGTATGAGCAACGCCAACCAATCAACATTGGCACCTCGGTAACCTCAA  
ATACCGTTCACCGTCAAATGGCTCTGCGATTATATAGGGTTCATTACTGGGGATTTGAGGC  
ATGACATGGACATAGGCAAATTTAATCATCGAATAACTATTGAAAAACCCACCACGAACCA  
AGATGCAGCTGGAGGAATTAATCAGACATGGGCGGCTTTTGCCACTGTTTGGGCTTCGATTG  
AACCACTCGCTGGCCATCGGCTATTCCAGTCTAAGCAAGTAAATGCTGATGTTACCGGGGTT  
ATCAATATGCGCTATCTAGCAGGTGTAGAACCCAATATGCGTGTTAAATACGGCAGTCGGAT  
ACTTACCATTATCTCCATAATAAACACCAAAGAGCATAATATTGAACTCCAGTTGCTTTATA  
AAGAGGCCCTCGATTAAATGCAAATAAAATTAGAGGGACAAGCAGAATTACAACAGACTAT  
TTTAAAACTGTCAAATCCGTACAATCCGATAAAGTAGAGCCGATTCTCTTTGATGCAGCCA  
AAATGGTTAAAACCGAAATTAATCTCGGGTACCGATAGATACTGGACGATTGAAAAAAGC  
GGTCATCGCCAAGAAGCTGAAACGACGTGATAATTATAAACCGGCCCATCTATTGCTGGCA  
TCGACCGCAAGAAAGCCCCACATGCCCATATTGTGGAGTTTGGAAAGCGCTGGCAGGTACGC  
CAAAAAAGGGAAACATAAAGGCCGTTATTTTGGCCCTATGCCAGCCAAGCCTTACTTTTCGTC  
CGGCTTGGGATACAACCAGAGACAAAGCCCTTAATCAGATAAAGACCGGCCCTGGAAAAACA  
GATAGAGAGTGTGCGCAAATGAGCTTTGAAACATCGTTTGTGACATGGCTAAAAGCCAACGT  
ATCGCTTGTTACTAACCGCATATATGCGGTTATTGCCCCCCAAGACATTACTCAACCTTACTT  
GGTATACACCCTCATATCCGCACCCAGAGCATATTCGCACTCTGGTGTCTCTGGAATAGTTG

AAGCCCGATATCAAATAAACATTTGTACCGACTCCTATGCAACCACCAAGAGTATTGCCAAG  
CAGTTACGGGATGCTCTAAGTGGTTACCGCGGGGCTATTGGTACAGAGATTGTGTATTCAGC  
TTTCTGTGACACCGAATTGGACAGTCATGATGACAACCTCAGAATTATACGTCAGTATCAGTG  
ATTACATGATTTTCATATAAAGAGTAGAAAGGAGTTAACACAATGGTAGAGGCAATAAAGGC  
TTATGGTACTACCCTTGCTCGGGCTGGCAACACCATCGCCGAATTGACTGGCATTAAATGGCC  
CAGCCATGTCAGCAGACACAATTGAGGTAACCTCATCATCAATCTGAGAATGGGTTTCAGGGA  
GTATATTCAAGGGCTGAAAGATGGAGGCGAAATATCGCTCGAGGGAAGCTTTATCCCTGGG  
GATACGAACGGACAAGTTGGTTTGATATCCGACTTTAACGAAGGCAATTCACAAACATTTGT  
AATTACATTCCCTGGCAACATCGCGACCTGGTCTTTTTCTGGTATCGTCACCAAGATAGAAA  
ACCAAGCGCCATTTGATGGCAAATTAGCATTAAATGCTGCCGTTAAAATAACCGGCAAACCT  
ACCCTCGGAATAAGTATATCTGATGGATTGACCACCCCGTATTTTGCTATATCGGAAAGCGC  
AGTAATTACACCTGTCCCAGCCGAGATAAATACACCTATGTAGCTACTGTATTGAATGGTA  
TAACTTCGGTCACAGTCACACCTACCGCCTTAACCGGGGTAATAACAATCAATGGTAACGTG  
GTTGCTACTGGTATTGCATCCAGCGCGATAACTTTGGGTGCAGCTGGCAGCGTAACCGTTAT  
TACTATCGTAGTAACTGAGACCGGCAAGGCCCCCAAGACTTACACAATCTATCTCAGCAGAG  
CGAGTTAAGGATAAAATTATGACTGAAATAGTAAAGGGTACACCTATTACCCTGGATAAACT  
CCGTAACCTGCGGCTAGATTTAAATGCCATGGCTTTATTTGAAGAAGCTACCGGTAAGAGTG  
TGTTTAAAATCGGCTCGGATATGTCTGCTCGTGATTTACGAGCGCTACTCTGGGCTTGCCTCC  
GCTATGAGGACAAGAACCTTACGTTGGAGTCTGTGGGAGGAATGGTTACTCCCCAAAATTTG  
GCAGAGATTAACACTCGGTTAGTGGCAGCCTTACCGCTGCTATGCCCGAAGTGGAAGTGA  
AGTAAGCCAGGGGGAAGCTCCAAGCCGTTAGTCTGGCTGGAATTGTGGGCCACGGCCCGCT  
ATGACCTCCATCTTACAGAAGACCAGTTCTGGCGGCTAACATTGAAGGAATACGCTGCTCTA  
CTAAAGCACCACCGCATCAACATGGAATGGCAGGATTACCGGGCAGGTCTAATATGCTCAG  
TCTTAGCAAACATTAATCGAGACCCCAAAAAACATAACCAAACCCTACACTCCAGCTGATTTT  
ATGCCTCAAAAAAATCCGACGAAAATGACACCTGAGCAGATGCTTGCTCAAATTAACCTCTT  
GAATACCGTATATAACGGGAACGAGGTCTAAATTATGGCCAGTGAAATAGCTAACTTATTCG  
TCACTTTAAGCGCCAATACCACTGATTTTCGCTGATAAAATGCAGGGCGTGCATAAATCCCTC  
GGTAAACTCCAACGCTCAGTTGATTCTACTGGTCAGAATTTCCAGAACTGGGACTCAAATT  
TGCAGCTGTGCGCGGAGCTATGCTTGGTTCGCTTGGCTTACTGGTAGATAAATACTCTGAAG  
CTGGCGATGAGATAGCCAAAATGTCAAACGAACCGGTTTCGGTGCTGAATCTCTTTCAGAG  
TTGAAATACGCGGCGGGTATGAGTGGTGCCAGTCTAGATGACCTTGAAACAGCTACCAAAA  
AAATGAGTAAGGCCATCATAGATGCCAATAGCGGGTCCAAGGCCATGATAGATAATTTTGA  
CGCCCTTGGTTTGAATGTTACCGCCATCAGGGATATGGCACCAGAAGAGCAGTTCTGGACTA  
TCGCTTACGCCTTAGCCGATATGGAAGACCAGACCTTGAAAACAACACTCGCACAGGATTTG  
TTTGGTAAATCAGGCACTAACATGCTGCCTCTACTCGCTGAAGGTCAGGCAGGCATTGCTTC  
TCTACGGCAAGAAGCCCACGAACTAAACGTGGTATACAGCGATGAGTCAGCAGCTGCGGCT  
GAGAAATTTTCAGGATAGTAAAGAACGCCTGACAACCTGCCATGCAAGGCATTGGGGCAACTA  
TCGCCGAAACGGTCATGCCAAAATCACCGAACTTATAAACTCTCTAACCGAAAACTAAA  
ACCTGCAATGGCATGGTTATCCGAACATCCCGAAATGGTTGATGCCTTTGTTAAATTTGGAG  
CTATCTTCTTAGCTGGTGAACATTAATGATTGGTATAGCACAAGCACTAAAAGCTTTTAAA  
CTGATACGCACAGCTGTAATGGGGGTTTTCAGCTGCTATGGCAATCTTACAAGGTATGACAGG  
CGTTGGGTTAGTCAAGGTTTTAGCTGGCGTTGCTATAGGTGGCGCTGCCATCTTAGGCATGA  
ATAAACTTGTTGACGATGCCATGAATTCTGATGACAGCGGCCCATGACACAAGTGTACTCT  
GCTGCAACTGGGGTACTGAGATATCCGCCTCCGGAACATCCCGGATTTGCACTGGGTGG  
GACAGTACCAGGACCGATTGGCTCACCTACCTTAGCTCTGGTACATGGGGGTGAAACTATTA  
TTCCCGCCGGCCAATCCGGAGGAGCCATGGGCGCAACTTTTAACTGAACTTAAACGGTGCG  
GTAATACGAGAAGATGCCGACATAGGCCGTATTGCAGAGCAAGTATCTGAGGTTATCCAAC

GCACTTATGAGCGGAAACTCAGACTGGCAGGTGCCTAAATGGCCAACAGCGTATCATTAAAC  
GGAAC TGACCTCAGCGTTTATGGAATTACCATCACCCAAGCCAAAATACACCAAACGGCTTT  
TAACCGTGATGTGACCCAATTAGATACCAGAGCTTTCGCCTCTCATGGTAAAAGAGAGGCC  
GCAAAATATCAACTGAATTTGACTTGTGGGTAGTAGTCTATTAGATATTCATACCAGATTG  
GCATCAATAAAACGGCTACTAACTACAGTAGAGACTGGCCAAC TGGTATTTCGATTTTATA  
TGGTATCTACTACAACGCTGCTCTGGATGAGATAGACGCTGAAAAC TGGACCCAGACCAGCA  
TGTCTGGCGTCATATCGTTCATTTGTGCAGATCCTTACGGCTACTCTACCACTGAAACCGATC  
AGACTGACAATATAGACACAGACCCGACAGCGGTAAGCATAACTGTAGGTGGCTCGGCTAT  
TGCCTTGCCGGTTTATACCCTGACAGCTGGT GAGTCTCTATCCGGGCGGATATCCGTCAAAA  
ACAACGATACCGGCGAAGAGTTAATTTGGGATAACAGCCTGGTTGATACAGACGAGTTGGA  
GATAGACACCGAACACTGGGTAGTCAAAAAGAACGGCACGGAGTCTATGGCTGACGTATCC  
GGTCAATCCCAAGGCTATTACCTGGGCAAACCAATGCAATTGTTATTACCGGATTTGGAAT  
AAAGGGCACATTACAGACTGTATTCCGAAGTAGATATATTTAAAAGGAGTTAATTATGGCTA  
ACGCACTGTACGCAAAGGCAAAAACAGGCATTTCTTTCCAAACAAATTGATCTACTGAATGAC  
ACTATTAAGGCAACGCTAGTTGATT CAGCTGACTATACCCCGGACCTTGCTAACCATGATTT  
CATTGATGATGTACCTGCTGGGGCAAGAGTGGCTACGGTTACATTGTCCGGCAAATTCGTAA  
CAGGTGGTGTGTTTGATGCTGCAGATGTTACCGCCAGTGCGGTCACAGGAGACCAGTGCGAG  
TACATCATTATCTGGCAAGACACCGGGACAGAAAGCACCTCACGTCTGATTGCGATTATAGA  
TACCGCTACCGGTTTGCCATTACTCCCAATGGAGCAGATATAAATATAGTCTGGGATAACG  
GGTCAAAACAAGATATTCCAAC TTTAGGGGTGACTAATGTACGCCAGAATTGACAGCACCCA  
AGTTAATAAAAAGGGACAGGAATTTGTCCGGGTAGATTTTTACCTTGAGAAGGGTGAGCCTC  
TTTATGACGGATATCGTGTCCGTGTGCCGGCCCGTGAATTAACCGAGAAGGAAATGACCGGG  
CTGACCGGTAAAGACGGGGCAATCTCAAAGGCTGACTATGAGGCTTTTGTAGATAAAAACA  
TAGGCTGGGAGATGAAGGATAACCCGTTTAATTGCCACTTTTTCGCTAAGCCTGCCACTCTTG  
AAGACCTCGATGATGCGGTACAGGCACGTATAAAGCTACTGAAAGCTAACTGTGCCGAGAA  
TGAAAAGACTGGCTGGGAGTTTAAACCTGCACGGCAACTCTGTCCGCTTACTGTATGTTCTG  
CCAAGTACTCCAAAGGCGAGAAGGAGATAATGCCTGGTACAGAACTAATGGAGGCTTGATA  
TGAGCTTAATTGATATCGGCATTGCAGCTATCAATCGAGCGGGTAGCCTAACTTATAGTCTG  
ACTATTCTGGAGGCTTCCAAACCCGCTAACGACACCGGAATCCTAGATGTTATTGAAGTTTG  
GTT CAGTTTAAAGCGCTTCAGGTGTTAAAGTAGGAACTTTTTATGGTTCTGGTACAAGTTATAC  
AGGGAGAGATTATGAAACTATAGGGT CAGTAGCTTCTGGGGCAAAGCGAACATTTACAGGT  
TTATCTATAGATGTA ACTACAGGAGATTTAATAGGAGTTTATTATT CAGGGGGCCGTCTGGA  
GGCTGATACCTCTGGGGGTTCTTGCCTTATGTATAGTAGCGGAGATGCTTTCGGCAGTACTA  
AAACCTATAGTTCTGAGAGTTTCCCGATATCTCTTTATGGCACTGGTGCAACTTCTGCCGCAA  
CCATTTCTCCATCAGCTATAGCACCCACTCTTGCTTTTGGCACTGCAAAGTTAAACCAAACA  
TTGTACCTTCAGGAATTTCTGCCGGTCTTATTTTCGGAACGGTTAATCTAAACCTGAACATTC  
TACCCTCTGGAATTGCCAGCACTTTGGGCATTGGCGCACCTATCATATCATTTGGTGGGTTTA  
GTATTGCGCCAGCGGTATAGCTTCTACACTAGTCTTTGGTATAGCTAAATTAACCTGAAT  
ATCCTGCCATCTGGTATAGCGTCAGGGCTTGCTTTGGGTGAACCTGAGCTTAGTATCATTGTA  
TCAGGCGTTATAAGACCCAGTGGCATAACCATCTGGTGTGGTATTTGGCACGCCTATTATCTCT  
GTTGCCGGACTGCATATACCGCCCCAGAGCAGATATTTAGTAGAGCTGCATACCCCTATCAG  
TCAGGGTTGGCGAATACCTTCAAGCCACAATGACCCCTCCAGCGCATGGGAAGGCGAAACC  
AAGGCATATGATGGCAGCATCGCAACCGGTCAAGCATATACATTCACCACCAATGCAAAAC  
TGGAAC TGATACCTGCCAGCCGTTATACACAAGTAAAATCAGAATTTATGGCGGTGGAAT  
AATAATGGGACTCTGTATTTCCCAATATAGTGATTGATGTGTATTACAGTGGTGCTTGGCAC  
AATGTATATACGGGTGGGATACAATATGATGCTTGGGTGGAGAAATCTTTAGCGTCTCCTCA  
AACTATAGAAAAGCCAGAGTTTCCTGTACCGACACTTTATCAGCTTCATATCCGATTAAGA

ACTTTTATGTCACAGAATTCTGGTTCTATGCTGCTCCAACCGGCGGGGAGTTGCTATCTATAC  
TTGAGAATGCCACGCGATATCCATAGAACAATCATTAAATAAAGCCCCTGTTATTTCCCTTT  
AGTTTACCAGCTGATGATGATAAGTCAGCGCTACTACCAGAGCAAACGAAATATGGATAA  
GGGATATCGCCAATAATACTGTTTTGGTCTCTGGTATTCTGGACGAACGGGTGGATACGCGA  
TGATAACTGACGTTGAATACACCGGATATCTTACCCAGCTAGCCAATGAATGGATTGATAGC  
TATACCTGCGCATGGGTCTCTCTCAAACAGCCCTAGATGAGATACTGGCATATCAAATATC  
TCCATATCCAATTGTTAGAGGCACATGCGAACATGGAGGTTACTACTAGCCTTACGCTTACTA  
ATTGCACCATACTAGCAGCATTGGAAAATCTCCAGAATATGTTTTCCGCCGGCCACATGGAA  
GTAGACAACAACCGCCAACCTGAATTGGTATCGACTGGGTGCACATGGATACGCCGGCCAGC  
AGATCCGTTACAGAAAGAACCCTTGTGGTATTACCCGGACAATAAATTACCGTCAGTTAGCC  
AATATTATATATGCCTACGGTGCCGGTAACTGGGGGAGTAAGGTTAAACTTTCCCAAGCAAC  
CGGTTACTCTTATGACTATGTGCAGGATACTACCTCACAAGCTACATGGGGAGTGATTACGC  
GGACTATCTGGGATAACAACCGACAAAACGCCAATTTGTTAAAGCATGGGCAGACCAGGA  
ATTGATTATCCGCAAAGACCCCCATTTATACCTATAAAAATTAAGCTCCTTGATCTCACAAGAG  
AACCCGGCTGGGAATTTAACAAGATATCACTCCTTGACCCGTATCAAATTATTGATGAAGAG  
TTGGGCATATCAGTTGAAACCCGCATTACCCGCATCAATAAGCGTGACTTATCTAATCCATA  
TGACGTAGATGTAGAACTGGCCAACCTCCGTTGTTGATATCAGCGATACGATTGTAATCTAT  
CACGTCGCAAGTAATAGTCATAACCTCAAAGCTAACAGCCCCACAACCAAATTCTAGCCAT  
CATTATAAGCAGGTGTGTATGAATTATCACATAAACCGTATTCAACTAGGGAGTAACCTACT  
CCATGCCCGCTCAGGGGCATTGGCAAATACTTTGTGCGACTGGAATACACATATTGGACCCAG  
AGAATGGGTGCGGCGCAATTATGAAGTGTGGTGTGCTATTATTGGCATATGTCTCAGGTGGTC  
AAATACGACCCGACCCATGGCTGGATCATAGATGAAGCTACTGGAGAAGGCTCGCGACAAA  
TTCCTTTATCCGAAGTTAAGGGTCGTATTTACTTGGCCAACCTGGATACCCAGACCACTCACTG  
AGGAAGAATGTGAACGTTTTCGTAACATTCTATAAGAAGTCCGCTATGACTACGCGGCATAT  
ATCTGGACTACAGCAAACCGATTATCAAGGGGATTTATACCCCGCATTATGGACAATCGGCA  
GATGTGCTGGGAACGCAATGCTGATTTTAATGGGTTCTTTGGTTATCCATGGTGCCAGCCGA  
ATGAGATGCCGTACATGCCTTTGTTTGTCTTGAGATACATTCAGCAATATAACACTCTCCCCT  
TAGAAATCAATACTAAAGATGTAAACTTTTTGGGAGGACGGCCATGACTAAAGAGGAAACC  
AATCAGCTAAACAGATTATCATCTCAAGTAGCGGTCATGGCCGAGACCATGTCCCGGGTAGA  
AAAATACATGGATGAGGGTAACAAGCGGCAGGAAATAGCTATCAAAGAGGCACAAGAGAC  
CGCTGACCCGGGCGTGTGAAAAAGCTATCAAGGTGCAGACCCAGGTATCAACGCTTGGCTGG  
GTCGGTGGCATAAATTGCGACTCTACTAGCGGCCGCTATGGGATGGCTTATTAATGAAACCA  
CTTGTTATGACCGCCGAGGAAGCTTTTCAGTATCCTACACAACTCCATGTAAAAACCATTAT  
GATTGACGATGAACTCCTGTACTATCTCACCGAGGAAGACTGGCTGCCATACTTAAAGAGG  
CATCGGCTAATCTTCCCAGTACCAGCCAGACCGATTTGATTGTGACAATTTTTCTATAGCCG  
TTATTGCACACATATCAGAAAAGTACCGGCTAAACAGTTGTGGTATGGCCAGAGGAGAAAG  
CCCGCAAGGATATCACGCATGGAACGTTATCTTGACTGAGCATGGCCCTAAGTTTTTTGAGC  
CTCAGACCTGCACACTATTTGAATTCAACGGGGGCGGATATTCCGCCGACATGGTTTTACTTC  
GGGTAAACATTGCTAGGGTAATTACAATCTTTGAATTCTCTGCATAAACGGCAAATCTATTT  
CATACTCTCATCGGCCTCTTTCCATAGATCATAATCATATGTAGAATACCCATCCCGTTTTG  
ATAGTTTAGGCCCATGGAATAACCAAATAAAATAGCTTCCCTCTTTTGAACATGGAATGCT  
GGTAATAAGTCACCATCCCCTGCGATTACAACAACGTGGGTAAATTTGGCGTTTCCCACTGAT  
TAGTGCAAAGTCTAAACCAAGCTGTAATCTACCTTCTTCTGAACAAATATCGGTTTCCCTTT  
ATCATCATTACCCGATATGCTAATCTTCTTTCGCGAACTGAAAACCGAGGAAGTTTACCTA  
TGTTGTTAAAGAAAGATTGTTTTTTGCTAAACCGCGATGCTTCTTTCAGGTGTTGGCGGATTGC  
CCTGGTAAGGAAGACAATGGTAATAAAATGTGCGAAGTAACTCTATATTGTCTGTGCGCTT  
AAGGAGATTATCTTCCGATTTCTTCGCTAAGTTTTGTGTAATCAATATGTATATGGAECTCA

TGCTCAGCAATTTTGTCTAGGTATCCGCCGTCAATAAAAATCGCTAATCTTGGCATTATATCC  
CCCTTAAAAGAACAGGCCAGACACCAAAGTGTCTGGCCCATCCGTTACATTATCTCTTGCC  
ATCCCTTACAGAACGTCAAGAACCATTAACACTAATATTATATAGCACAGGGTGTTCGGTT  
GTCAACACCCTTATCAACATTGCCAACATATATATGCATTATACCTCGTCAAATGTCTACATA  
TCAGTACCGGTATTA AAAAAGCCCCATCATGGGGGCTGCTTTTTTATTGTTAACTTCGGTT  
AACCTATTGACATATGGTACTGAATATGGTACTATATGAATGTAAGGAGTAAATGAAATGAC  
CGCCAGCGATAAGAGAGAACAGAAGATACGCCAGAACCCAAATAATGTTTCACTTGAAGAT  
TTTGAATGGCTGGTCACCAAATACGGGACTATTA AAAATGGGCGGGTCTCATGCTAAGGCACA  
GATTGGGAAGTACTCCCTGCCTTATCCAAGAACAAACCCAATTCGTA CTTGCTATGTAAAGG  
ATTTAATAAATAAAATAGACAGCCTAAGGTA ACTGGTTGTCTGGAGGTGTATATGGAAACA  
GCATTAAGAAATTAGACTACTACATGGAGTTACCCTATACAGTTGTCATTGAGCCTGACGA  
AGATAATGACGGCGGA ACTTACTATGTTGCCAGAGCCTTAGAATTGACAGGTTGCATAGGTG  
ATGGAGATACTCCGGAAGAAGCCCTTGAAAGCTTGGCTATTCATAAAAAAATGTGGCTTGA  
AGACCAGATAGAACGAGGGTATAAAATTCCTGAACCACAACAGAAGTTCAGCGGTAAGTTC  
AATGTCCGGGTTGGCCCGAACTCCACCGGAAACTGTCCCAGAGGGCGTCTATGCACGATAT  
GAGCTTAAATCAGTTTGTACGGAAAACTGGCGGAGGCTGTCGGTTGA

>BTF08-1

TCAGCCACCTCGCTTGATTTGGTTATAAACATAGCCCGGGGTTACTTTTACCCCGGTTTGCTC  
GGTAAAAGCCGGGCTGCCCTGGTATAATTCATTTCCACGCGATTGAACGCTTCCAAA ACTT  
TTGTGAAGTCGATACTTTTCTCGGCCGACCGATTGCTTTGCCTGATTTGGTGCCATTCTCTTT  
TGCATAAGCAATTCCGGCATTAACTCTTTGTCTTATAGTTGATTGCTCCAGTTCTGCGGCCGC  
CGTCATTATGGAGAAAACAAAATTCCCCATTGGAGTAGTGGTATCAATGCCGGAGTCCATAT  
AAGATTTAAAACCGACATTATAGCTATTAAGCATCTGCATGGAATTTACGGCATGGATCACA  
GATCTAAAAGCTCGGTCAAGTTTCCAGACAAGCAGAACATTGAACTTTTTCAGTTGGGCCTC  
CTTCATCAGCGCCGTCCAAGCCTTGCGCCCGGTAAAATCTGATGCAGAAGCCTCATCTGTAT  
ATCCCGGTAGATTTCCCAACCATTGTCCGGCACAGTATTTACGAAGCGCTGCGAGCTGCAGC  
TCCGGGTTTTGTCTTTTGTCTTTAGTTGATACCCTGGCGTATAGAGCTACTTTTCA TTTAGTTGC  
TCCTTGCTTTTTCGTTGGTCCATGATGGAAAACAAAACGCCTACCGATCCGTCCACACCTAGC  
GTTTACCCCCCTGATAGAAGCATCTCCAGTACCTTTGGCCTATATTCTTCTTGTACGCCAAC  
TCTTTAACGCATGCCGACATGGTTTCCGACATTGCCATCACTACGCCGAGTTTTTTGTTTCTCG  
ACATCCGGGCTATTCAACATTTCTTAACAGTATAACTTGACCGCTGGTTTATGGTCTTCCTA  
TCAGCAATGGTGTTATCCTTTATTCGCTGTACTTTACAAAAGCATCAGTAAAACCAGCCGCT  
TAATCTTAGCAAGCATCGCGTCTGCGTTGACTTAAACGGAATACGCACCGACCTGCACACGG  
TAATATTTTTTTGGTGTGGTCCGGTGTGACGGGAACGGGTGCTTCCGTTGCAGCCAGTCCAAC  
CTTTACAGCAGCACGGAAGGTATCCATCGACTTTCCATGTTTTCGGAACCAAGTGCATGACGT  
CGCCGTGGTTGCTGGCGATGCCAGCTTACAACCCTCACTGTGGCAAATGATGTCTTCTCC  
GTAAGTCCATACTGCTTGCAGAGATATACGCAAAGCTCCACGGCTTCTCTGTA AATGGCAGA  
AAAATACGAGGCATCGGTTAGACCGTCCTCGCAGATTTCAAAGCCGATATGTGTATCGTTCCG  
CAGAACCCCCGGCGTGCCAACCTCTGTAATTCCACGGTAGAGTCTGATAGGTGGCTATGCTT  
CCGTCAGCCAACTTGCCTATGAAACCGTGAACGCAGACCTGCCTGCCATCGGGCTTGTCTTG  
ATCCAGTGGTTGTTGTACTGGTTCTTGCCAGCAGACCGTCTGTCGGGACCCACATAGCGTTT  
GAGGTTGGGGTTGTTCCGCCAGTGGAATGTACCATGATGCCTTTCCGGTGTGATGGTTTTACC  
CGCTTTGTAGCAGGCATTGTTAGTCAAAATGAGTTTGTGCAGGTTCA TTTATTCGTCTCCGT  
TCTGT CATGAAGCTGTTCCAAAATGTCTTTGAGTTTCCGCCGGAATGGGCAGTCCGAGATGCC  
CGGCATTTTCGAGCATCGAGACGCCCTCGTTGGAACAATAGAAGAAGATGACGGCTGTCCG  
CAGAACTTCTCCGTTGCCGATGAGATAGGTATCCATGATATGTCCGATACCGACCATCACAA



ATATCAGTACCTTCTTGCAGATACCCTTGAAGCCGACTTCGCTGGACAGATTTTTGTCCGCAA  
TCGCGCACATGACGCCCGTGATATAATCGGCGATCACGAACACGAGCAGTGCATAAATTA  
ACCGTCCATGCCTCCAAAGAACCAGCCGAGTGCGCCGCCGACTGCCGACAGCGCGAGTTGA  
ATCCAATTCCAGATTTCTTTTCATGTTGTTATTCCTCCATTAATAAATAGTCACGCCGTTAAA  
TTGGGTTTTTCAGATGCTTTGCCGATCAAGTCAGAAAGACGTGCTTTGCCTTTCCGCCCGCC  
CTGTTCGACAGTAAATGCGGTATAGAAACCACCCCTGCCGAAATTGTGTGCCACATCCGTGAC  
CGTACCGAGGATTTTCGGTTTTTCGCACCGCTGATGATGCGAACCTCGTCGCCAATGGTGAGCT  
GTGGCGTGAAGATGCCACGAAGCTCTCCTGTCTGCCGGAAGTGGCAATGGCTTGCGCCAGC  
TCCTCGGCCATAGCCGTTATCTCGGCAAGCGTCGCACCGTCAGCGGCTGTTACGTAGGTCGT  
TCGGTGGGAGGGCTGAACCCACCACTTGCTCCTGGGGACTGTGGCATAAACCGTGTTTTCTG  
GGTCGGCGCAGGTGACACAGACCCTGCTGACCGCTTCCGAATCGTCATATTCCACGCTGTAA  
CTCCAGCAAGTCTTGTTCGCGCTCGAAGGTATACACAGCAGGCTGGTCGAAACGGGCATCTGA  
AGCGGCCGCCACGCCGATGATGCCATTTGCCGTTTCATCGACCTTCCAGCCGTCAAGCAGAG  
AGATGACCCGCTTGATGCCGTCCAGTATGGTGACATCTGGTTCGAAGCGCAGCTTCCATGCC  
TTTTGTCTGTTCGCCGACAAAAAATCCTCCACCTCCGCGAGGCGAAGAATTTCTTGCAGGTT  
CAGCTGAAGCGTCGTTTTCTCAAATGTATTGTCCTCATTGAAGGTCTGTTCCCTTCAGCAGTTT  
GCCAATCGCGTTTTCTGGCAGATACGGATACTTTTTTCGTCCGGGTAAGGTACCGAAGCGCGGT  
CGATATAGAAGATGCCGAGCATGATTTCTCCGCTGCTGCCGAGGGAAAAGTGCAATTCCATC  
TTGGTGCCGGGTGTCACGAAAGCACGGTAGCGGTTGAGCAGTGCGCCCTTGATGTTGAGCAA  
GGTGCAAGACATCTGAGACACCTCACTGCCGATGCTGAATTTACAGAGCCGTCAATAAACG  
AATTTGTGATGTCCGGTCGGCAGCATATACATGACAAACCGATGGTCGCCCTCGGGCGCTCCAG  
AACCCGTATGCGCCGTAATGCGCCACTTTTTTGTGCTCGGATACGACACCGCTTCATCCGGT  
GAAATCCTGTGGTTTTCCGTATAGGTCAGGCTGTCATACAAACCGAGAACCGGGTCCGCCGT  
GCTGCCCGTGACAGTACCTTCGGCGGTGAGGTATATAAAACGGAGCAGGTTGTCCGAGGTGT  
GGATCACCTGCGGAAACAAGCCTGCTCCTGCGTCAAGGGAATATTCAAATGTCAGCGTCATG  
GCATCACCCCGTTGCAGCTGCACCGAGTAGGTGAAGCGCAGCAAGTTGTTTCGCGGTCTTGA  
ACGGGTACTCAAGCGCAAAGCTGGCTGTGATCGACGCACCTGCCGCAGGCGGTGTAGTGAA  
CTTTAGCCCCGGCACGGTCTTGCCAAAAAAGAAGGTTGAGCCGAAGCTCTGTCCGTCCCTTG  
TCGGAAAGCTCTGGTAATATAAATTGTATGTCCAGTTGTAGCTGACACTGCCTGCTACGGTT  
AAGGTCTCTACCTGTTTTGTTCCACATTGCCTGCGGCGTCAACTGTGGATGTCGGTATGGCG  
GTCAACCCTGTGCAAGTATCATTGCAATGCTAATATTCAGGGTAGGATCATTATCCGCAGC  
CACTTTAGCGGTCAGACGTACATATCTTCCGTTATCGGGACTGATTGTAAAGAAGTCCGTGA  
TATCGGAGTTTTGTGCGAGAGCAGCGTTTACCTTTGTCGCAACTACTGTCGAAGAGTCTCCG  
CTTGTAACCGGCACCGAAAGGGTGATCGGGGAGTTTACCATTCCAGCCGCCGTTACGACAAC  
CGTTGCGTTTTCCCGCAGTCCCTATGGTTCGGTACATAGATATTTTCTGTTGCTTTACGGC  
GGCGACTCCGGCTGTTCGTATTGGTCGAGGTTGAAACAACGGTCAGACCCGCGCAGGTGCCAT  
TTGACAGTGCATATTCAGACTTGAGACATTGGCTACCGGCGTTTTAGCGGTTAAGATCACA  
TCCGCGCCTGAGACCGACGCGTCATATACAGCTGAAATATTCGCATTGTTTTCAAGGGCTGT  
TTTTATCTTGCCTGCCACAATGCTCGCCGTATCCGATGAGGCCACAGGCACTGAAAGAGTGA  
TCGGCGAACCTGTCATACCATTTGAAGTGACGACGACGGTGGCATTGCCTTCACTACTTAAA  
AAGACTCTCCAGTACCTCGCCGATACTTCTGTGAATTTCCAGACCTGACTCGTCCTCGAAAG  
CCCTGATACATCCGTCCAGTCGGCATCGTTTGTGAATACTGAATTTAAGAGTACCGAGCCT  
TGCGGAAGGTACGGTCAGAATGTCAATCTTAAGCGTATTGCAGGCCTTTGCTGTTCCGAAAT  
CTATTTTAATCGGATTCACATCACTACCGTGCAGGAAGAGGGATATACCGTCTGTCATAA  
CAGCTCCACCAGGCAAGAGGGTCGCGATAGTCGTAGCTGCTGTTTGGCGTTTTTGTGCAAT  
ATCACCGAATGATACTCCGGCGCTTTTGCAGGTCATCGCCGCCGTATGGTAGTTTTTCATAACA  
GTCGCCGACAGTTGTTCTCAAATCCACCGTATAGTCCGTTCTTCTGTCAATTCGGTATCGTTT

GCAAAAATACGTACGGTCCCGGACTGTATCAGCGGACACTTCATACTGAACTCGGTTGTAGC  
TCCGTCACCCTCGCCGATGACGAGATGGTCGACCGTGTAGGGTGGGAAAACCTCATGGTTTG  
GGAAGGTTAAAAGCTCCGACACCTGCAACGCCAAGGTGCTTGATGATGCGGTTGTTTGACTCG  
CTGTCAAGGAACGTGGTTACGGGCAGGTCATACTGATAGGTAGTGGTATCCCCGTACCGCC  
GCTGAAGGAATAGCTTTTACTGCCGTGATATTTACGTTTCATATCTGAGGAGTACTCCACGG  
GGAAGCGGGAAAAGCGAACATAATCGTCCGTA CTTCCTGTGAGAAGCCATTTAAACAGGTA  
GTTGTTAGCCGCCGTGGGATAAATGCCGTTTGTACCGAAACCGGAAGGCGTGCAGGTAGCGT  
AGAAGGTTGCGGTTATATACACCACATCTGTATCAGTCTTTGCGATGGCGATCTGGTTCCTT  
CGGAATCCTGCAGCATGGCATGGGACATGATGTAGTAATAAGATGAAAAGGTGCCGCTGTA  
ATAACCTTCGAGTGCCACCTCGGTAATGGTGGAGCCGTTACACTCGGTCGCTTCCAGCTTGA  
TTTGCTTTGTAGTATGCGAAGTCGGATATTCATAAACCGTTTCCAGCGTCGTCACAGCTTTGC  
GCGTAAGATGTGTA AAAAGGGCGGTATCCGTAACGGCGGGCGTCCCCGTTCCAGTACCAAC  
TGCGATATATCTGAACAGGTCTGTCGTTTTACTCAGCGGAGAAGCCGTCAGCCTGCTATTAA  
AATAGTAGTTCGTAATGACGTTGAAGCCGACTGCTGTCTGCTTGATTTTACCGCTTACGGCAT  
CGACGACCTTAACGTCAAAAACGGTTGTGAAGAACAGCTCGTTCTTGTATCTTCATTTTAAA  
ACCTCCTAAATTGGTAATGTAGAAACAGGTTGCAGGCTCACAGACGAAGCTACAACCGTAA  
TAACAGCCGTATGTGCTGGTTGGTAGCAATTAATGAACACCGCCTCGTCAATCCAAGCGCCC  
GCCGATATTGTAGATATGGCTGCAGTCTCGTTTTCATAAGTGAAGTAGTCCACAGTTTCTGA  
GGCAGCGACAGCGCTCAGCGCGGGCAGAAACCATCTTTGCAAGCCAAGTTTGTAAATACCAG  
AGAGAACGGTATTCGGCATTTGTAATGGTTACCGCTACCGTCCGTGCGGATATCGGAGCTCGT  
ATATAGAACAAGCGCCTGTTCCCTCGCTGTCGTAGGAAGCGGAGATAACGGTCAACCCGGAA  
ACGGAGAGGGTGCATTTACCGGGAATCCCGCATCGATACTTCCGTTCAAAGGCTTTGTAAG  
ATGGATTTTTAAATCCATAACACAAAAGCCTGTATCGCGGTTTCCAGCTTTTCCACCGAGGCCA  
CGGAGATTTCTTCGGTGTCCGACTCGTCCAGCAGGATATAGGGATAAGCGGTATTCCCGCAC  
GAGTACTCCTTGTTTCCAGCGTGTCCAGTTCGGTTATATCGGAAATCCACATCCTTACATTAGAG  
GCGTTGATGTGGACCGTTTCCGGTCGAACACTCATTCCGGCATAGTTTCCGGTGGGTGAGTGC  
CAGCAGCATCCGTCCGTTGTTCTGCGTCAAAAATCCGATGCGGAAGTCGTTTGTTCGGATAA  
CTGACAGCGTCTGTTGCCCGTACCAAGCGTGGCTACTTCATGCTCTGCTTCCCAGACATAG  
CTTCCGTTTTCTGACAGCAGAGCGCCCGTAATACACAGAACCGCTCTTGAGGTAGCCAAT  
GATTAAGCCCTGGTCAAGGTCTTGTTCGACGCTGGACTGCCAGCCCTTGCAGGCAGATATCT  
GTGAAACATCGGTGGCAAGAAGTACAGTATTATCGCTGTCCCGCCAGACCTGAACATAGAG  
GTTTTCGTCACGGACATAAAAAATATACGGGTATTCCCTCGGTTTGAAGGTAATACCATTCCCT  
TTCGGCGTTCATTTTCCACACGCCGTTAAATTCAATCGCCACATCAGTCGCCGTGCCAAGTGT  
CCACTGGTGCTCCACGGATACTCTAAGCCAGCCGGAACTTCCGTTTATATATCTTTGCGAC  
ACCATCGTCCAGACAGATGGCATAAGCCAGAGATAAATCGGATTCGCCGGCAGTCTGGCGC  
ACAGCCACATCTCCGAAAGCCGGAGCAATATCTTCGTGAATCGGCTCGGAGAGCAGCGAAT  
TGACGGAGGTCTGTGTGGCTACCACACGGAGTTTTGCTAAGCTGTCCGTGTTTTCTACCTTGA  
AGCGGTTAGCAAGTTTTTCTTTTCCAGCGCCGTTGGTATGCTTCTCATGGGTGCTCACCTCGCT  
TACCGCCGCAAGGGTGGCTGTGACCTTATACCAGCCAGCCGCTGATAATCAAAGTCGCCGA  
GTTCAAGTAATTCTTCCGCTGAAAACGCCCTGCTTTACCGAGCACTCAAGCAGCGGAACGCTA  
TCCTCGGCTGTCATCAGCGCGGCTTTCCCGGCTTCATTAACATGGAGAGTCAGTTCATAATG  
CACGGTCGGCGAACCGAAGCGTGTGAGATACTCTGTCCCGTCAAGGGCGGTCTGCACCGTTC  
GGATGACCTCCTGCGTTTTTCTAAAAGATACAAAGCGCGTGTGATGATTTCACTTGTCTCCATAT  
TTTTCAGATAACTCATAACGCACCTCCTGTCTGAGCCTGTCGATGATGATGTCTACGACCGA  
GGTCATTTACCAGCAGAATTAACACCTTCCACGCGGATAATGCCGGTGTGCTCCACGGTTT  
TGTTACATCAAGAGCGGTGTGCTTACCACCCGATTTATATCCGAGTCAATGTCCATCTTGA  
AATCCGTCGGCAGCGCGGTCTGCATATCGTCTGCGATCCCCTTCATCGCGCCGTCGATGTCCT

TTGCCATATCAGCTACGGCATAACACGGCATCCTTGCCGTTGCTGTCGATAGATCCGGCGAGA  
CCTTCGACCATCATCTTGCCAAGCCAGCCCATTTCTTTGAGGGAGAAGCAATACCAAAGAA  
GTCGCAGATACCGTCCCATATGGAAGAAATCCAGCCAGACACTTTATCCCAGAGCCACGAG  
GCCAGTACTGTATGCCTTGCCACAGGCCTGAAACGATGTTCTTTCCGATTTCAAATACCGC  
GCCGACCGCCTGTCCGAGTCCCTGCACAATTGCTGCAATAATCTGCGGAAGGGCGGCTACGA  
GCTGCGGAATGGCTTGAATCAGTCCAGCAGCAAGCTGAACGGTGAGCTCGATGCCCATTTCA  
ATAATCTCAGGCAGATTGTCTGTAATAAAATCTATTATGGTCGTTATGATTTCCGGCAGCGC  
GTCGATCAGCTCCGGCAGTGCGTTCAGCAATCCCTCTGCCAGCCCTTTTATAATGGCAAAGG  
CCGCTCGAGGATTTTGTCCATATTGTGAGCAGCACCTGAACAATCAGGAGGATCGCCTCA  
ACGATGGAAGGAATCAATTCAGGCAGAGCTTCTGCGATACCCAATGCCAGCGTCACGATCA  
TCTGAATCGCGGCTTCTATAATGGCGGGCAGATTGTCGATAATGCCTTGAACCAGTGTAAGG  
ACAAGCTGCAGAGCGCCTTCCGTGATAGCGGGCAGAGCCTCAATCAAGCCCTCAAGCAGAG  
TCATGACGATAGAGGATGCGCATTCCACGATGGTCGGTAGATTTTCTACAATCGCATTTACG  
ATAGCCATGACGATATCCATGCCGACCTGAATGATTTTAGGCAGATGCTCCATAATCATGTC  
GGCAAGCCCGCCTACTGTATTGCCGATGACCTCGCTTATCTTGTCAAAATCGTCTCCGGCCTC  
CACTAAGCCGGAAGTGAAGTCGCCGAGCAGCGTAGTACCCTCGTCAGCAAGCGTCTGTAGC  
TGCGGAAGGAGTACCGTACCCATGACGCGCTTGGCAGCTTCCGAGCCTTGCTTCAGCCGCTG  
AACGGAATCATCAAAGGCACCGAGTTTTTCGATGCTCTCCTCACTCAGAACAGCACCCATGC  
GTTTCGCTTCTCGGTGAGCGCGGCATGCCCTCGCTTCTTGGGCGATAAGGGGATTCAAG  
TCTGCGCACTCTTGCCGAAGAGCTGCATGGCGAGCGGTACGCTCCGTTTCATTGGACAC  
GCCTCCGAGAGCATCAATGACCTCCCAGTAAACGTCTCGCTGTGCGGAAGATTGCCGTTTG  
CATCGGTAACCGACACGCCAAGCCGCGGTACGCGTCGGCATAATTTGCGGAGCCGTCCGCC  
GCGCTCGACATCGATTTAACGTTCTTGGCCATCGAGCCTGTAAGCGTATCCAGAGAAACATC  
CACGAGGTCTGCGGCATAACTGTATGCCTGCAAACTCTCAACCGACATACTGTCACGGTGG  
ACTGGGTCAGCATTTTCATCCGCGTAAGCGGCGGCTTCCACGGTCATATCGACCAGAGCTTTG  
CCTGCGCTTATAGCAGCTGCACCAACAGCAACAAAAGCCGCACCCATTGCAGCACCGATAC  
CTTTGACAACCGAACCGAGCTTTTCAAACCTTGCTGCCGGAGGAATCGGCTTCTTGCCCGTTT  
TTTCAAGCTCGTCTCCGAATTGGTCCGGCTTGCTTCTCGGCATCGTCAAAATTGTCGGCCACAT  
TGTCAGAGCCTTTTCGTTGTCCTTCAGTTCGCGCTCCATGCCGTTGAGTTCGCGCTGCGCGT  
TATTCAGCTGCACCGCCACTGCTGTGTGCGGCGGTGCTTCTCGCCAAAGGAGTCGGAGGCG  
TTTCCAGTGCTTTGCGGAGCGTTTCGATTTTATCTTTCTGGGCGTCGATTTGTTGGTCAGA  
ACCTCATTTTTGGAGGTGAGGGACTGGACGCTATTTTCGTTTTTGCCAAATTCGGATTTCGACC  
AGCTTCATCTCCGAGCCGAGTACCTTGAACGACTGGTTGATGTCGGAGAGCGCTTTTTTAAA  
CTCTTTTTCGCCCTCGACTCCAATCTTCAAGCCGAAATTGTCACCCATATCTCACCACCTCCT  
TAGATGCCATTTGGTATGATTTTCGTCGATGTAATACTCGCGTTTGGCCTTTGCCAAGCCGTTA  
AACTGCTTGTATATCTCCCACTGGTTCGAGCAGATGTCCGATCGGCATCAGCCATACTTCGGG  
CTCCGCCCGACCGAGGAGGGTTGTTCCATAAAAAATCAGCCGGGCAAACAATTCTTCATCGC  
TTACCCGACCGACACGTTTTTTGAGGGTTCATCCTCACTTTCCACATTTTCGCTTCGTTCTTTA  
TACATCGCGTCCATGATGGCATTTTTATAATCCGAAAGCTCAAAGGGCGAAGTGAGTAGTTC  
GACAGCTTCTCTGTGAGCAGCTCGCGCTTTTTGGCGGGATTTTTTCAGATTGTGTACCAGTAC  
CGACTGATTGGCGAGGAGTGTAATAAGCCATACGATTTTCATCAAGAGCCATCTCGAAATTCT  
CGCTTTTCATCAGCTTTTCGCCGAGATTGGAAAGCCACCGTAGCGCCAGCGATTTCTTCCG  
TTGCCCTTGGTGGTGAGGAGCATCTCATACTCTGCACCTCCGATGGTAATTTTGGAGCTTCTTT  
CGTCAGCCATTAGGCTTACCTCCAGTCTGCGCTGTGAACGCAGGCTCATAGACCTGCGTGT  
ACCAGCCGGTGATAACGGAAGCCGGTACGCTCGTATCGTCTCATTCACTTCGGCTTTCCAT  
GGGTGCTTGCCATTTCCGTCCAGCTTATTGCGGCGGAACACCGTGCCCTCGATGGTCCGGGT  
GGAGAAGGTGATGCTGTCGCCCTTGGTGGCGAGGTTGGTCCCGGGATACCAAATTTACCC

GGTAAAGCCAGAAATAGCGGTACTTTCCATTTGCCTTTTTTGCCCGGAAGCCTACCGCAACG  
GGAGTGCCGCCGCTCCTCGCTGCCGGACACTACGACGTTGTTATCGTCGAGTTTTGCGCCTGT  
AGGTCCTCGGCCGCTGTTACGCCGATATCGTCGATACCAAGCGAGAGAGTGCCGTTTTTAA  
TTCCTTACGACCTCGGCGGGACCGTCGTCCGCATAAAGCGTCGCCTCAGCAAGCTCGACCG  
ACAGATCCGCTTTTCATTGCTTTGGCAAGAGAGATTGGAGCGCTGTAGGTTTCTGTTCCGTCCA  
CAGCCTCCGTGATTTTTGAGTAATAAAGTTTGTCAAGCCGATAGTAGCCATTTGTTATTCT  
CCAGTTCGTAAATTTTCGCCACGTCGATGGCGTAGTGGTGATAGCCGGTATCGTCTTCATGTC  
CGATATAACCGGCGGTCTGTTATTGTAAATTCCGCGTTCAGCAAGGCGCGGACAATTTGGTTT  
TTCATAGCTGTGTAGCTTCCCTTATCAAAAAGAGAAAAGCCGCGCTTCTTGTGTTTCGTGACGG  
GGACCGTCATCGGTATACAAAGCAAAGGTATCCGCCAGCGGTGTAATCACAACGTATCTGTT  
CGGGGCGGATTCCGAAAAACGCCTGTTTCGACGGGTACAATCGGTAAGATGAGGGTGTT  
AGTTCTTGAAGCAGGCTCATATGTTTTCAACCTCCTTCTCAAACGCTGCGATCATCGCATCAA  
CACAGGCACTTTTACTTGCCGATTTTGCGGGTTTGAGAAAGGGTTTCGGAGGCTGTCCGCTTT  
TGCCGTAATCCAAAACACCTGCAATCATGGCGTTGCTTTTGCCATCAGGACGAGGTTTCAGAA  
AATCCAACCTTTTACAGTGAAATTTCCGTCCTTATCCTGTCTTGCGGAGGAAACGCCCAGCGC  
CGAGAGCAGCTCGCCAGTTGAGCGGCTTTCTTCCCTTGTTCGCTGCCGATAACGGCTTGAA  
GGTTGGACTTAACTTTTGCTTCCACAACATCGCCGCCCGCTTCCAGCACCTTTGGGATGATTT  
CATCTGTTTTTTCTCCAAGCCGGGAGAGTTTCAGAAGAAAATCCTCCGGCATTTTAAATGCTG  
CTTTAGCCACTCGGCTTACCTCCTTGGCGAGTACTTCAATGTACATCCCGCGACCTTTCACA  
TCCTCAACTGAGATGATTTCAAAGTGACAATTATCGTTTATCACAACCATCGCGGTTGTAAC  
GTAACGTCCGGGGATACAGCGAAAGCGGAAAAGGTCGGTGGCTTCCGAGAATTGAGCCCGAT  
TTGCCAATTTCTCGTTGCCGTGCCGACCCTCCCGGTACGCTCTGACCGAAGCTACGATATTGT  
CAACCTCGGTTCCGGAATCCTTCTGCATCTTTTATGGTCACTTTCTGGGCGATGTGATGAGGG  
TGTTATCTTACCAAAGCTCATGCTCACACCTTCCAATCCCGGTCAAGTCGCAAAAAGCAGAT  
TGACCGTGTTCCATACTTGCTGTCCGGCCTGCACGTTGTGTCAGAGAAAAAGCCGCCAGTGCTG  
CCGTCCCTTGATTCATAGAAATGGGACGACAGCATAATGACGGCCTGCTCTGTGGTAGGCGG  
CATCTGATGGTCCGGTGTAGTAGTTTTCTGTGAGATGCTGATAGCTCTCGGCATAGGACACAG  
AGGCGGATATGTACAACCTGCAGCAGTTCATCGTCCGCCGTGTGTTCCAGGATGAGATTTGCT  
TTCATTTTTCAAGCAGCGTCATACCGCCACCGTCCTTTCATTATTCTTCCGGTCTGCGATG  
ACCACAGTGAAGGTTGCTTCGGGATAGCCGGAAGCCCAGATGGTGAAGACCTTCGGCGTAT  
TTATGATTTTCATCGCATTTTAAACCACATGACGATATCTCTGGCTGAACCACCGACAGTAGCG  
GCTTCAGCAGCATCAGCGGCTGTAAGTTGAGAGCCGTTGTACTTAACCGCAGTAATATCTGC  
AAGTCTGTGGTAATGAGCATTCCGACCCACTTGTGCGTGCCCTGCGCCGGATTGGAGCTTG  
GAAAAGCAATCAGTTCCGATACGGAAGCCGCAACGGCAATAACACCGTCTCAATGGTGAT  
CGCCGTAACCTTACTTTGGTTGGCGATTATATCCTCGCCACTGGGTGTGGGGATTTTAGAAAC  
CGATACATTCCATGCATCCGGAGTCATAAGCCCTGCATCTTTCAGTTTGGAGCAGCAGAGCGT  
TGAAATCGTCCTTGACTCCAGCTACAGTAGCAGCTGTGCTGGTTGCTTGGTTATTTGCAGAA  
GGAAGCCCCGTTATCGAGGCTCCCTCCTTGATTTCCAACGTTCCGCCGATGACGGTTTTCTCG  
CCGCCCTGTTCCGGTGTAGTTCTTCGCATTATATTCGCTCATATCGCTACCTCCTTAGGCCTTCA  
TCTTAAGAATCTGTACGGCTTCGGGTAGTACCAGTTTGCCGTCGACACGCTCCTTTGCCACAT  
AGCCAATCATGCCGTTGCCTGCGTAGAGTTCCTTGAGTTGTGCAAAGGAACGGGAACCACGG  
TCACCGATGTTGTAGTAGCTGAAATCACCGAATGCCATAACAGGCACCCCCGGTGCAATGGT  
GGGAACGAAAGCGGAGGTGTAATGGAGTAGCCTGCTAGCTTGTCCGGTTCACCAGCCTGA  
TAGGACGGCTGCCAGATATATGCGCCGTTGCCGTCTTTCAGCTTGCAGGAGAACGGCAAGCGT  
CTGGTCAATTGGTGATGAATACGGCCTCTTACGATACGGGCGCTTGAGGGCATAGATGAGGT  
TCAATACCTCGTCTGCCGTAATCGAAGCACCGGAAGTAGTAACGCCAATCTGACCGCCGCCA  
GTTGCGGCAAAGATGCCGAGGGGCTTGCCCTGACCGTCTCCATTAAGGAAAGCATCCTCCTC

AGCATTGGACAGAGCCTTAGTGAAGTGGTCGAGGATGTGGCTTTCAAGATTA AAAAGCATTAT  
CGTAGAGCAATTCCTCCGTGACCTTTACAGCCACATGGAGCTTGTGGGCGTCAAGCAGAATC  
TGCGCAAAGGTCGCGTCGCCGAAAGTAAGCGCAGCGCCCTCATCAATCCATGCCGCCGAG  
GAGTTGTGGCTGCGATATTGATTTTATGCTCACCGCTGGTCGTGATTCTGGTAGCTAGCTTAC  
GGAAGATATTCTCTTCCTCAGACCCTGAATAAGACGGTCATCATACTCAACGGGGACAAGA  
TAACCGCCGTCCGTGTCAACACCCTTTGTAGGACATTGCTGACCTGACGGAAGTTGGAGCG  
GAGCGCCTGCAGCATTCTGCTTTGTACTCATCGGACGCTCTGCCGGTCTTGGTTTCCATTCC  
GGGGACGGCAGGCTTGCCTGTGAGAGGAGTGTTAGAGGTTTGGAAAGCTCACGGTCGAGT  
GCTTCCTGTTTTTCGAGACGGTCGATTTCTTGCCGAGAGCGACCACGTCAGTTTCCATTTTG  
TCGTAGGTAGCGGTATCCTCAGCGGAAACCAGTCCATCTGCACC GCGCTTGGTATCGAGGAA  
AGCCTTTGCAGCTTCCCATGCTTTTGC GCGCTTTTCGCGCAGTTCAAGAATTCTGTTCATTGA  
TGTTACCTCATAAAAATTTAGTGTGAAATTAAGAGAGCCGCTTTTCCAGCGACTCAACGGG  
TGTGCCCTTGTCTGTTTGGGTATCTTAGGTTTAACTTGTTCAGTAGCGAGTTCGTTACCGCC  
CGACGGCTGAAAGCATAGGTGACGTCCTCCGGTTGAATCCGCTTTTTCTCATCTTCCAGAAG  
GCCGTCCGCAAATCCTAATTCAATTGCTTTATTGGCATTGAGCCAGGTTTCGGCGTCCATAAG  
GTGGGAAAGCTTCGCACGGGACTGCCCGGTCTTGATTTTCATAGGCGTTGATGATACTCTCCT  
TGACCTCGTCCAGCATAGAGATTGCTTTCTGCATTTCTCACTGTCGCCGATTGCGATGGTCA  
ACGGGTTATGCACCATCATAAGCGCCGTGGGAGCCATTAACACCTCGGTTCCCGCCATAGCG  
ATCACGCTTGCCGCCGAAGCCGCAATGCCGTGATTTTTACGGTAACCTTGCCCTTATAATCC  
ATGAGCATGGCATAAATCTGACTCGCCGCGATACAGTCGCCGCCGGGTGAGTTGATCCAAAT  
ACAATGTCACCCTCTCTGGCAGTCAAATCTGCTTTGAATGCTTTTCGGGGTGACATCGTCGTC  
AAACCAGCTTTCCTCGGCAATCGTGCCGTCAAGGTAGAGCGTTCGGGCATCGGAATCTTCAT  
CCCGCGCCAGTTCCAGAATTTTTTTCATTCGGTTGTATCCTCCGTTCTGTTTTATTTGCGAAC  
GCACCCGCGTCCTGTAATTTGGTCATCGCGCCGTTGATAAGGTAGAGATCGCCACCCAGTTC  
CGCAGGGATGCGGTGAGGTTTTCAAGCTCACGAATGTCGTTGGCAGACATCCATCCGTTCT  
GGCGTGCTGTTGCGTAACCGCTCATAACGGCTTGCGTAATCGCCGCGTAGAAGTCCGTCCACA  
TTGAACTTGATAAACACTGTTGGCTTTTCGCTGTCGAAAGCAGGGCACGGCACATGGACTG  
CTCCCAGCGCACACCACCCACGGATCGAGTGTGTATTTACAAACTCAAGGCTCTGCTGCTCGA  
TGTTGCTGAAGGATGATTTTTCAAGGTCCGGCAGCATATGCGGCGGCACTCTGAAAATACGG  
GCGATCTCATTAAATTTGAAACTTCCGCGTTTCCAGAAACTGCGCTTGTTCGGGTGAAATCCC  
ATAGGCTGATACTTCATGCCTTCTCGAGAACGGCCACCTTATGTGAGTTGGCTGAACCTTG  
GTAGGCGGCGTTCCAGGATTCTTTGACCTTCTGCGGGTCTTTAATAGTTCCGGGATGTTCAAG  
TACACCGCCGGGCGCGGACCGTTTGCGAAAACTTCGCTCCGTATTCCTCGGTGGCAATGG  
CGAGTCCCCTGCGTTTTTTGCCATCGCAATAGGCGAATACCCGACCAGACCGTCAAAGCCC  
AAGCCAGGAATGTGCAGGACATCGGCCGGGGTAAGGTAGACCTGGCTGTCTTGCCGAGAG  
AGGGTACGTCCTCCGAGCTTCGCTGATACAAATAGAAGAGCCGGCCGTTTGAATCACGGTGC  
ACTGTCATTTTGTTCGGCATAAGTGGGTAGAGGGAAAGAACCCTCGCCGTGTGCATTGCGTAT  
AATCTGCGGTATGCGTTACCCACAGTAAAAGATGACTCATCAGCGTTTCCCGGAACGCGA  
ATGAAGTCATCTCAGGGTTCGGTTCGTCGTGGAGCAGTTTATATAACGGATGTTTTAGGTTTT  
TTTCTTGCCGCCGTTGTCATTGTA CTTATATACATGGAGCGGCAGACCCGCCAGTGTTCAG  
ACAGTATCCTTACGCAGGAATAGACCGCTGTCATCTGCATGGCTGTATGTTTCGTTGACCGGC  
TTTCCCGCGCTTGTACTGCCGAAAAGAAGTTATAACGACTACCACCAAGAGTATCTGAAGG  
CTTATCTCGAGCCTTAAAGATTCCCTGAAAGATATTCATAGGCATTTACCTCCAATCAAAA  
ACGAGCAATCCGCGTGTGTCATACACGCTTTTGTCTGATCGTTTCCGCACCGTATCGCCCG  
TCAAGCGCCATAATGGTGGCAACAGCGCCGTCGATTTTCTCAGTGGATTTCTCTTTGTCTGTT  
TTAATGTTTCCGGCAGGATCGGTGCGGATGTAGATGTTATCCATCATCCAGCGTAAAACCGG  
GTGACCGCCGTGGGCAAGTTTCTGTTCTAAGGTTAGCTTCATAAGTTCTTTGTCGGAGGGG

ACATATCCTTGAAGCCCTGCCCGAAAGGTACCACTGTGAAACCGAGGTTCTCAAGATTCTGT  
GTCATCTGAACTGCGCCCCAGCGGTCGAAAGCAATCTCACGGATGTTATATTTTGTACCGAG  
TTCCTCAATAAACTTTTCTATATATCCGTAATGGACGACATTGCCCTCGGTAGTTTTTCAGACA  
CCCTTGCTTCTTCCAAACATCATAATTCACATGGTCTCTGCACACACGCAAATCGATGTTGTC  
TTCCGGTATCCAGAAGAACGGAAGCACGATATACCGGTCATCCTCATTAAATCGGCGGAAAC  
ACCAGGACGAAAGCCGTTATATCTGTGGAGGAGGATAGGTCAAGTCCGCCGTAGCATACCC  
GACCCTGCAGCGCTTCCGGGTCGACCGTAAAAGCGCAAGCGTCCCATTTATCCATCGGCATC  
CATCGCACGGCTTGCTTGACCCATTGGTTCAAGCGGAGTTGCCGAAAGCTGTTCTCCTCGGC  
GGGGTTCTGCCTTGCCGATTCAAAGCTGCTTTTACCTTGTCATACTCACCGTAATGCCGAG  
AGAGGGGTTTGCTTTTTCCACACCTTTGGGTCTGACCAGTCGTCTTCCCTGCGCTGCTCCATA  
AATGACTGGATAAAAGGACGAGTCATGTTTTCTGCCGTCTATAATATCCAGTGCCTTCTGAT  
GCACCTCCCAGCAGATGCTGTTTTGATTGTTTCCGGCCGTTGTAATAAGAAAATACAGCGGC  
TGCATTCTCGCATCACCACTGCCCTGGAGCATAACATCGTACAGTTTCTGTTCGGCTGGGTA  
TGCAGCTCATCAAATATAACGCCGTGTGTGTTGAAGCCATGCTTGTTCCGCCACATCCGCTGA  
CAGTGCCTTGTATTTACTGCCCGTCGGAACATAATTCATAGTTTTTCAGGCTTGCCCTGGATGCT  
CATTTTGTAAACAGATGAGGGCAGCGTTTGACCATATCCATCGCCACATCGAATACGATAC  
GCGCCTGGTCTTTATCCGCAGCACAGCCGTAGACTTCGGCACCGGGTTCAAAGTCCGCGCAG  
AGAAGATACAGCGCGACAGCCGCCGCGAGTTCACTTTTCCCTTGTTTTTTTTGGTATTTCTATA  
TATGCCGTGTTGAACTGCCGGTATCCGTTCCGGTTTCAGTATCCGAATATATCCCGTATAATC  
TGTTCTGCCAGTCGATAAGCTCGAAAGGCTTGCCGTCCCATGTACCTTTGGTATGGCAGCA  
GAAGTTTTCGATAAAACACACAGCGTGGTCGGCGGCATCCTTGTCATAATGACTGTCTTCAG  
CCATAAACCGTGTGGAATGTATTTTTTGAGTTTTCTCAGAGTTGCCGCCTCCTCCCGGACAA  
AATAAAAGACACCCTCGATAGGTGCCGTACTACGAGCAAAGAGCCGTTCCGGCTCTGATGC  
TTTTTGTTTACTTAGTAATTGCTACCGTGCAGCAGGATTTGACTGCAAGCTGTGTGTCGGGA  
TCAGCGGGTTCAATGTCCCACCTCTGTCTAGTTACATACTACCTTGCCGTACAGCTTGAGC  
ATCAGCTTGCTGATCTTGCCGCCGTCGATGCCGAAGTACTGCCTTCCCTCGTACACCTTTATC  
CAGTAATGAAAAACGCTTTCGTTAATTTTCAGGCTTCCTTCTTTCCACATTCCTCGTCTCCT  
TAAAACCGCTTAATGCTGACGTTGTCATCAGCATCGAAGCTCACGTTGTAGCGAATTTCCGA  
GCCGTCAGCGTTTTTAGTAATCACTCGAATCCCGCCTTCAAAGGCTTTGTACATTCTGTGAT  
TTTTCTGCCCTGCGGGAGCTGCTTCTCGATTTGCTTAATCTGTTTCTCTGTCATGGTGGTGTTC  
CTCCGTTCTTTAGGTTGTGTGTATATTACCGTCACTTTGAGGATATATCCAGTCATTATCGAG  
ATATAAACCGGCATAAACTACACAATCATTCTGAGGTGTTTCCATCGAAAACACAGCAGATT  
ATCCTCAATCCTACGGCAGGAATCCTCACCATAGACCACGTTTCAGACCACAGCCGTTGTCC  
CATTTACCATGACACTTGCCGTGTCATCTACACCGATAACAGTACCTTTGGTGCCGACTGGC  
GGTGCTGAACATCGTCCATACGGACAAGCTCCACCCGGCAGCCCTTCGGATACTGCCTGCC  
AACCATCTCCACAATTTCTTACTCGAAAGAACATCTTTTGCACCTCTTTTGAAGCGGAGG  
AGCCGTTTCAGATTCCGCAGCAGGATTTTCCGCTCTTTTTTATACACCTCACCGATGAAACCGA  
GGCGAAGCAAAAAACAGCGGAAGGCATATTTTTCGTTCTCAACTTCTTTTTTCGGTGGCGTTG  
ACCCGCTTCTGATTCTTACTCATAGCACACAGTGCCTGATGAATTGGCTGTAGGCATTGAC  
CTCGTCCGAGTCTGGTATGGCATCAAACCAGGGGAAGGATATCGTATCCTCGTTGACCTCAA  
TTGGTGTGTCGGGATGCGGAGCGCTTTGCTGATGAGACTGCCTTTGGCTTCAAGCAGCTTC  
GTGAGGTTTCCAACCGACACCTTGTCAGCGGAAGGGTTATAACGAGTCTGTTTCATTGCC  
GCTGCCGGCGCGCTGTTCCGCCGTGTCGGGGCTATTTCTCTCCGCTGTGGTGTATCCGATGG  
TTCGGGCTCAAAGCCCTGTTCCGCAAGGCGCGCCACAAGGTTTTCAATTTCTCGCTGTCCG  
CTCTGTCATCGAAGCTGACCGCACCATTTGTCAATGGTGAATAAGTCCACCTGGTATGCC  
GTGGATGGCATTCCGAGATATTTCCGTTCCGGCTCCAGTGATTTTGTGATTGCGCCTACAAGC  
CTTTTTCGCTCCGTACCGTTCACGTTGAATCTGAATGTGAATGTCGCCATGTACAATTCCTCC

TTCAATTTGGTAGTGTGATATTACCGTCAGTGTTTCAGATATATCCAGTCATTTCTGCGAAATA  
TATCACACAATTATTCGGAGGTTTTGCCGCCATTATTACGGGCAGACCACACAATACCGGAA  
AGCAGGAAGTATACGCATGGGAGAGCGATTCCGTTGCCCCACATCTTGTATTCCGCAGCGTC  
GGAGTAAGGGTTTTTCAGCCACGCGAGTATCTGTTTCCGCGATTTCGGTTTTGAGGAGGTTCC  
GCAAATGAGCCTATGTGTCTCAAACACATCCGTCCAGAATGCGATCTCACCGTATGTGGGAG  
CGGCCGTTCCGAGGTCTGCGCACCACCAGTCAGGGAATCCCTGCAGTCTGGCGCATTCCGGTC  
GGAGTAAGGCGGCGGACAGTGTATTCCGGCTCGGCTTTCGCAACGGCTCCGGGACCTTTCGC  
CAAAGGGTCCGGCTGAAGCTCCTCCTCGACGGAGGGTTTTGACTGCGCGTTTTTTCCCTGGTT  
GAAAGCATCCCTGCCGATACCGTAGCAAGGCTCTGCAATAAATGTAGGGTCTTATAATCCC  
GCGCCAAAAGCGTAGGCGACTGCTCCTCGCCGATATTGGCAAAGGAACCAGTGGTCATAGC  
GTAAACAGCATGGCGGTCCGGCGGTGTTGAGGGTAAAGGAAATGTCCTCGTTCACACCGTCG  
CCCTGCGGACCATTCTCTTTGCGCCCGATCATCGAACCTTGAAGCACATAGGTTTGCTGC  
TTTGTGCGCTCTGCAAAGCGCACCGCTCTTGTACCCGAGGATACGGACTTCGTCACGCTG  
GTTCTGCGTAAACGGGATACCTTCCACCACGGCTATACCACCCTGGTTGCAGGTGGGGTTGC  
CGCCATTACCGTCAAGACAGCGGGACGAGTCGGCTTTATAAAAACCGCTGTGCGGATTATCC  
GATTTTCATGGAATTGGAGTCTTTGGAGCAGATGCCGTAGGCCTCTACCACGCAGTTGAAGTT  
GTCCTTATCCGGCATCCGCTGATTGCCGCCGGCATTATTCGCTGTGAGCGTGGGAGACACAT  
CACCGCCATCCCAGGCTTTCGGCTCGAAAAGCGTCTGGTCATTGTTGCAGGACAGCGTAGCT  
GACCTATCCTCCTGAATCAGAGCGCCTTTCCCGCCGCCTTCGCAGCCGCAGCGTATCTTCAA  
AGTTTTTGGCGTACCTACTACGAACGGCTGATTATTACCGCCCGTGCCGTAGGTCGAGAGTA  
CTGTGGGTGCAACATCACCTGTATCCGGTGTAGCGGGTGTCTGGCTGTGGTTTTCATACACTG  
TCGCCGGAACAACACCCGCGCGGAGCGTGGGAGACATCTCTTCTCATAGCCAATCGACCGT  
GCTTTTGCCGAATGCTCGGTACAGAAGCCCGCCGATTCCATAACACATGGAGGATGATGCGC  
TTCCGCACGAAGCGTACTGGTCAAATCATGAGTCACATCCATACGGTCTCCGCCCTGGTCAT  
TGAGCACGACGCCGTTTTCTTCCAGTGCTCATGCCGCAGTTGATGCCGAGGGTGGCGGCTTTA  
TCTTCAGTCAGACTGCCGTTATATCCGTCAAACCGACGCCTGTCTTGTGACGCGCGTTTTCA  
GACTGCGGGCAGTTCCCTTGCCACGCACGGAAGCCCTCCGAAGAATACCCTGACAGGCCTTC  
GGACTCAAATAATATTTGTCCGGCACTCCGACCTGCAAAAATCCGCGACAAGGAAGATACGTT  
TTCTTCTCTGGGGAACCTCCCCAAAACCTGCGCATCGAGAACTCTCCACGCGACGGAGAAATCA  
TCTCCAGGATTTACCTGCGGATTCCCACTTTTTATATTAGGAACATCACAGGTTTTCGTCT  
TTGATTTTGCAGACAGCGTCGAGGACTGCTTTGAAGTCTTCTCCCTTATTTGAAGAGAAGGC  
ACCGGGGACATTCTCCAGCAGATCCATCTCGGATACTTCCATCGGTTGAGCACCTCATTTTC  
TTTTACGATTCGGACAGCTTCATAGAAAAGGTTGGAGCGGCTGCCGTCCAGTCCCGCTCTCT  
TACCGGCAACGGACATATCCTGGCAGGGACTGCCGAAGGTGATAATGTCCACCGGCTCAAT  
CTCGCCGCGTTTCATCTTGCTGACATCACCATAGTGCTTCATGAACGGCAGGCGTTTTGGTGGT  
CACTCTTATGGGAAAAGGCTCAACCTCCGATGCCAGACCGGCTTAATACCGGAAAGAAGC  
CCTCCCAAAGGAAAACCCCGGAGCCATCAAACAGGCTGCCGAGGGTAAGTCCGCTTTCGG  
ACATAGACTTATTCTGTTTCATCCGTCTGCACCTCCTCAAATCTGAGGGTCTTGCCGTTCCGG  
ATGACCGATACGTTTTCCGCTTGTACCGACCTGCTCGATGTACCGTTTTACAATTACATCGCAG  
TACTTCTCATCGAGCTCGGCTGTATAACAGATACGCCCAGGACTGCTCACAGGCGATGAGCGT  
AGACCCGCTTCCCGAATGGGTTCGAGGACGATGGAGTTCGTAAGAGAGGAATTCATTATG  
GGTAAGCCAGAAGCGGTATCGGTTTCATTGTGGGGTGATCGCCGTTTTTCTTCGGTTTGTCG  
AACTCCCAGATGGTGGTTTTCTTTCTGCCGGTGTACCACTGATGCTTTCGCTTTTTCTTCCAG  
CCGTACAGCACTGGCTCGTGCTGCCACTGATACGGAGAGCGTCCAAGTACCAGAGACTGCTT  
TTCCAGATACAGCAACCGGATAGATAGAACCCCGCGTCGTCAAAGCGCGGCGGAAGTTC  
AACCTTCCGTATCAGAGTGAAATACATATATACTGGCATCGTCCGCCATGCGGCTTGCTAT  
ATTGGTAAAGGCATCCAGGAGGAATTGATAAAAACCTTCTCGTTCGCCATATTGTCGTTCTTGA

TTTTTCCGGCGGAGCCTTCGTAATTGACATTATACGGTGGGTCGGTCACTACAAGGTTGACG  
CGATGGTCACTGACAAGAATATTGTAGGTTTCTTTTTTGGTGGAGTCGCCGCAGATAAGCCT  
GTGCCGTCCGAGCGTCCAGACATCTCCGAATTTTGAGAAGGTCGGTTTTTGTAGTTCGGCTTC  
GACGTCGAAATCGTCATCCTTTACCTCGGTGTCCTTGCCGAACAAGTCCGATAGTTCCTTTTC  
ATCGAAACCCGTAAGACCAAGGTCGAAGCCGAGCCCCTCGAGTTCCTTCCAACCTCTATCTTCA  
GAAGTTCCTCGTCCCATCCGGCATCAAGCGCCATACGGTTATCGGGCAGGATATATGCTTTC  
TTCTGCGCCTCGGTTAGGTGATCAACATATACACACGGTACTTTCGGTGTATGCCTTCCTCCATA  
GCCGCCTGGATTCTGCCGTGTCCGGCTATGACGCCGTAGCTGCGGTTCGATGAGGACGGGGTT  
CACAAAACCGAATTCCCGTAAGAAGAGCGGATCTTTTTTATCTGCTCCGCCGAGTGTGTTC  
TCGATTATTCTGATAAGGCACCAGCTTTGCGATGGGCACGAGCTGCATCTCAGTCGTTGTCT  
TGCTCATGCTTTTTACCGCCTCTCGAAGTTCCTGCGAACAGTGATTCCACTCCCATCTTTTCG  
CAGCCGCCGAAGTGACCGTAGGTGCAAGTCGCGGAATAATCCGTGTGCTCAGCTTGAGAA  
ATTCAATGATGGCGGCCGGACGGAAGTTGAATGTATCAATGACAGCGTTTCTGATTGCAGTA  
TCGGAATACTTCCCTGTGCCGAAGGTGTCTACCTGAACGGATACAGGGTTCGGCCTTGCCGAT  
GGCATAGGATACGGCCACCTGGCATTATCCGCCAGGCCGTTCTGAACAACGGACACGGCG  
ACGCATCTTGCCATATATGCCGCAGAGCGGTTCGACCTTGGTGGGGTCTTTGCCGGAGAATGC  
TCCGCCACCGTGCCTCCCTCGCCGCCGTAGGTGTCCACGATGATTTTTCTGCCGGTCAGACC  
TGTGTCTGCGGCCGGACCGCCTTTACGAATCTCCCGGATGGGTTGACGAGGATTTCTGTAT  
CATTATCAAATGGAAAGCTCTCGAACACCGGCCATAGGACATTGGCGATAACTTCACTGCGG  
AGAACATCGAGGTCCTTGCCCTCGGAATGCTGAACGGAACTACGATGGTCTTCACACGCAC  
GGGCTTTCCGTCCTCATACTGAATGGTCACCTGTGCCTTGCCGTTCGGAAAAAATTCCTTGAC  
AGTACCGTCCGAGCGAACCTTGTGACCCCGCTTGCAAATCTGATGAGCAAGTTCAAGCGGCA  
GAGGTATAAGGCTTTTGGTTTCATTGGTGGCGTAGCCGTAACGGTGCCTGATCTCCGGCG  
CCGATGGTGAATAACCAGGAGGTATCTCCATTCTTGATTCAAGGGCTCTGGACACGCCGCC  
GTCGATGTCTCCGATTGTTTATGTACATATACATAAATGAGGTAAGTGGAGTGGATTGTATCC  
GGCTTTCCGCAGCGCCTGTCGTGTAATAAATCGGATATCCACACGCTTTGAGCAGGTAATTT  
CACCAGCTACGATGATTTTGTGTCCCGTTGCCATGACTTCGCAGGCTACGCGGGAGGATTTA  
TCAAGCCGCAGGCATTCGTCCAGAATGCTGTCCGGCAATAAGGTCACACAGTTTATCCGGGGT  
ACCGATGCATACGCTTTTCGAGGTTTTAAATGATGTCATATCAAATCCCTTTCTCTGATGAA  
GCAGTCGTTCCAAATCATCATTAGGGTTTGCGCCGTGAAATCCACGGTACAATTCTCCTTG  
ACGATCTGCATGATGGCGTCCCACTGACGGGCTGCCTGGTTCATATAGTTGATGCCGATATT  
TATAAACGGAGAAGTAATCGGCTTTCCGGTTGTCCGGATGCTTTGAGAGGAAACCGAGCTCAT  
TGGTCATCTCCTCGCACTGAATCCATCGCGCCACGCACATGGCATAACGCTCTATTGTCTGG  
GGAGACACATAGGAAGAGCAGCCGATATTGCTGAGCCACTGCCATGTTTCTCGTATATAAC  
CTTTGCGCGGAGCTCCGTACCATCGCGCTGTTTTGCCGAGAGGATGTCTTTCCGGCTTCGGCAT  
TGCCGTCCCCTAACATCGGGAATGTCCAGAACGGTAAGTTTCCTGCCTCCCGGATTGCCGC  
TGGCCGTTTTTTCGGTCACGGCTTTTTTCTTACGCCCGCGCCGGGTCTTTTTCCGCCCTGCC  
ACCGGTGTTATTCGATTTTGTCCGATTTTTCTCACCGCCTTCCTTTATCACCTTTTGATTTCC  
CCTTTTGTTCACACGTGACCCCAGGCCGTTGCTCGGGATTA AAAACCGTAGAGATTCGAACG  
CCCCACCGGGTGCCTCAGTCGTCAAAGCTGTGCTGCTTTTCGTGTTCCAAGTTCACCGTGCGCC  
TTCATATGGCAGGAACGGCAGAGAGACACGAGGTTTGACCGTTCATGCGTTCGGCCTTCCGA  
GAGCGGGACACGATGGTGGACTTCTCAGCCGGACGGTAGATGCCATGCTTCAAGCACTCCT  
CGCACATGGGAGACTCACGGATTTTTCTGTCCCTGATCCGTTTCCAGGCGCGTCCGTATACAT  
TCTTGTCCGTTGGTTCGCTGGTATCGGTTGTAGAAATGTTCCGGCTTCGTTTTGTGTTCCGGGC  
AGTAAATCTCACCGTCCCCGGCAAGGTTGGGACAGCCGTTACATACGGCAGGGCCTTTTTGGT  
TTCTTCGGCACTCATTTACCTCCGTTTCCGCGCATAAGAAAAGCCCTGGGGGATTGCTCCCT  
CAAGGCCTTTCGGATCATACTTTTCTATACTACCATTATACCTATATTGACCGGGACAATC



TGTGCCATAGTGTGCCAACATTCAAACCGGCACAGAAAAGTTATAAAGAGCAGTTGAATGA  
ATCCTGTGTACCGTCCGTCCGAAACATTGAGTAGCTGTGCGATGTCGTCCCAATTATAGTT  
ATTGAGGTACCGGTATCGGAGAAGCAGGCGCTCATCCACGTTAGACACCCGGTTCGATTGCCG  
CGTTCATTTCCGTTTTCAAATCCACATAGCGGTCGATGTCGCGGTTGATTACCTTTTCCAGGT  
CAACGATTTTCTCAATAATTCTTGCGAACGGGGCTTCGGTGCTGCGCGACTTGCTGACGCGC  
TCACCCTCAAACACTGCAGGATGTCAGCCTTGTGGAGTAATCCCGCAGGCGCTCCAGTTCAGT  
AATGCGGGAGTCAATCAGCTCGTTGAGCCGATATGCCTGCCGTAAGTATTCTTTTGCCGTCA  
TAGAAATGCCTCCTCTCTCAGCTTTCGTATCAGCATCTCACCATCGACGGAGGTGAGAGTTTC  
GTACCAGTCGGAACGGAAGAACCGCTCCATTTCAATTAACAGCGGCCATCGCGGATCGGCTGT  
GCGGGTTTTTGCTCAACAGCTTCAACGCTTGCTGTAATCCTTGACTGCCAGCAGGATGATG  
GCGTTTGCAGATTTTCATAAGCGTCCGTCATTTCACTGCCTCAAATCCGCCTTGACCGCAT  
CGATAAGGCTTTGCTGGGTGACGTCCTTTTGTGACAGCACCTTGAGAATCCGCTGGTCTATG  
GTGTCCTCGGTCACGATGTGCTGAAGCACCACGGTTTTGGATTCCCTGCCCTGTCCACAAT  
CGGGCGTTCGTCTGCTGGTAGAGTTCAAGACTCCATGTGAGTCCGAACCATAACGATGGCGCT  
GCCGCCGATTGAAGATTCAGTCCGTGTCCGGCAGATGCGGGGTGTATCAGACCCACGGGG  
ATCTCGCCGTTATTCCACCTCTTGATACTGTCGGCTTTATCCATTTTCGAAAACGGGATATGG  
AGACTGTGCAGCCGTTCTTTTATTGCTCAAGGTCATGCCGGAACCAGTATGCTACCAGAAC  
AGGCTTCCGTTCCGCCCTCAATTAATCCTCCAGCGCATCCAGCTTCTGTCTGGATGTG  
GGTAACAGAACCGTCATCGGCGTAGACCGCGCCGTTCCGCATCTGGGACAGCTTGTGTGTA  
GGCTTGCGGCGTTGGCGGCCGTTACCTCACCGTCCGGCAAGGCAAGCACCAGGTCGTCCTTA  
AGTGCATCGTATCGTTCACGTTCTTTTTCTGAAAGCCGCACCGTGTACTCGCTTGAAATCAGT  
TGCGGCATACGGATGAAGTCTGTGCGCTTCATGGAAATGGTCATATCGGATATTTTCTCGTAT  
ATACGTTCCCTCCGCACCCGGGAAGGGGCTTATAGCTGAATACCACCATGCCGTTTCGCTTATC  
CGGGGTAAAGTACTCGTTGCGGTAGTGGGTGATGTATCTTCCGAGCCGCTGTCCCATATCCA  
GCAGACGAAACTCCGCCATAAATCCATAAGTCCGTTTGAGGCGGGCGTACCGGTCAGTCCA  
ATAATCCGTTTTACCCTGGGTCTTACAGTCATAAGGCTTTTGAATCTTTTGCCTGTCCGTTTT  
TGAAGGAGGAAAGCTCGTCTATAACCACGGTGTGATAATCAAAGGGGACGCCGCTTTTTCC  
ACCAGCCACTGGACGTTCTCACGGTTGATAATGTAAATGTCCGGTTTTGTTTTAGTGCCGCA  
TGCCGTTCTTCTCCGTGCCAACCGCCACGCTGATTATGAGATCTTTCAGATGATCCCATTTTC  
TCAACCTCCGCAGGCCATGTATCTCTCGCGACCCGGAGGGGCGCTATAACCAGCACCCGGTG  
TGATTCAAAGCTGTGCAACAGAAGATTGATAACCGCCGTCAGCGTAATGACCGTCTTGCTCA  
GCCGAGGCCCATATCTAAGAGGACTGCGGCGTTTTTATGCTTTTTCGATGTAATCGACTGCAT  
GGCTCTGGTACTCATGTGGTATGAACTTCATCCGGCATCACCTCCTTACGATTTTGTCTATA  
TTCGTTGCGGTATCAAGGACATAAACCTTGAAGCCGAGTTTTCTAAGTAACCTGTGTCTTGCC  
ATCTGCAGCGGCTCGGCTTTTCTCCCGGAGCTTTCACCTTCTACGAAAGCCATTCTGCCGTTT  
GGAAGGAGCAGCAGTCTGTCCGGCATCCCCTCATAGCCGGGGGACACAACTTGGGGGCAA  
TACCGCCGGCCGCTTGACCGCATTACCAGTTTTCGCTCAATCTGTTTTTCTCTCATATTCCA  
GTACCTCAAATGCCACAGCTTTCGCCGCTCAAGCGTTTTCAATCCTTCGGTTTTTCCCACCACT  
GGTACGGTTCACCGTCAATGACGACCTTGTAGAATTCTCTGCCGCGATAGCTGTCTATTTCTG  
CCGTTATCGTTCTGCGGGTTTTGGGCAGTACCCTGAATCCCGCCGGATGTTCCACCCACTGCT  
TTTTCAGAAACGCTCTTTTCCGTGACTCTTTACGTTTTGCCGCATCGTCACGCTCCTGCGCCG  
CCAGCATATTCCCGGACATGGTGCCGTCGCATACGCAGCCGACCCGGAACCTCGCCGATCCAC  
TGGGGATGAACCATAACGTGGACATATCTGATGCGGTCATAGTCGCAGAGCTCACAGGTGA  
AGGTTGCATCTTCCATTGTGATGACATCCTCGCAGACCCAACCGCTGCAGGGAGCGCCGATT  
GATTCCAGTCTTGCGATGCATTTCTGCGAATATCCGCTCACTTTTACTCCTCCGTTCTGACAA  
AAATAATAAATGTAACGAAAGTAACTACTTGTAGGAGAAACATATATCTCGTATAGAGCTTT  
TTCTTTACGACCCCATGAAATTAACACTACATATATATATGGTTGTCTTCCGAATGAGGGTG

TTACGGGGGTTATTCTCGTTACAGAACTCTTCAGCCTCGGTATCGACGTCAATTTTCAGGCA  
TACGACGCGGGTGTGACGCCTTGAATCCGCTTCTGAGTCTGGTTGTTGTTGCCGCCCTCCGA  
ATTGAAAAGCTCTCGATATACTCTCTGTCAATGGAATCCCTTGATGCACTTGGTATAGATGA  
AACCGGAGTCCTCAAAGCCTCGCGCAGAACCGACGCTATAACGAATACATGATGCTTGTCG  
ATTTTGCCGTAACAGGGAGATACAGCCGTATCGAAACGGTTCTTGTGTTTCCGCGACCCATCC  
CTCAACAAAATGCCATGCTCTATCCACGGAATCTTCCTTTTCCAGCGACTTGCAAGTATGAAG  
CAGCGTCATACCTAGTTCCAACGCCTCCGCTATGGCATCCTCGTCGCTCATACTGAAAAGGC  
ACTCGGAGGAATATTTGTGCGCAAGGGTGATAGCGGCTATATTGTCCAGATGCGCGCCGGG  
GTCGCGGAGGTCAAGCATTTCAAAGGACTTTTTCAAGTTCCTGCGAATCTTGGTGTAGTCG  
CGCTTAATTTGCCTTTGACCGGCATTGCCTTTTCAACCAGATACCTTACAAACTTCTCTCCGG  
CAAAGCCATAATTGTCTCGCTGACCTGGTGGACATACCGCCCGTACTCCATGTCTCGATA  
GGCTGACCGTAGACCTCCAGAACACGGGTGTTTATGCCGTCCATAGAGGTTTTCGTTTGTGAT  
GGGCTGCTCCCCGGTAGAGATGATGCTGTTAAGCCAGGTTGGTACTTCCTGCAGGCCGCCGT  
TTTTTGAACCTCTGGTCTTGCCGTAACCGTTGCCAGAGAGTACACGATGGTGGAGGAGGAC  
AGCCGTTTTTCGTTTACGACCTGCAGCTCGTCCAGACCAAGCGGCAGATGCTTCAACGTTCC  
GGCTCTGCGTTCCAGACCGACCGCCGTGGAGTTAAAATTGCCCATGAGTTTTCAGCGGATTGC  
CCCAGACGGAAAGAGAGAATTTACGATGGCGGTCTTCCGCTCCAGATGCGTACCAGAA  
GTGGATGTTGATGATTCTGTTCTGCAGCGGACTCAACATCGGGGAAACAAAGGAACCCGCC  
AGCATGGCTCTCGATACGGCCGACTCCCGCAGCACTTTTGCGGTTTCAAGCCACACCTCGAA  
ATCACCTTTGCGTTAGCGCCGGGAGTATCTCCTCGCCGTCGTCACCGTCAAACACGATCTC  
GCCCTCTGTGACATAGGGGTAGAACTCTTTTCCTATCCATCCGATTCTGCTCACGCTGCGGAT  
AAAGGGAATGACGCCGCCGTTCTCGTTTCATAATCAGTGAAATACCGCACCATGCCCTCAG  
AGTTGTCAGAGGACACCAGAAGGCCGCTGTGCGCGTATTTTACGAGGGAGGTTTTATTGAAC  
AGATTTGACCGGGGAGCGCGAAGGGTCTTCCATTTGCCGTTTTCGCATGAAGGCGAGTTCCAT  
CATTTCATGCCGCTGTGATATTCTCAAGCCTTGCGGTGATAACCACGGGCTGATGGCAGA  
GGCTCACTTTTATTGGAACGCCGTTGATGTAGGATGTGGAGCAAATACCTTCTTCAATGCTG  
ATCTGATATCCGGCGGGTTCCTGCGCCGTTAAGGTCGATGCCGTCAAGGTTGATTTCTGC  
CTGCATACTGTCAAACCTCCGGCTCTATGGCTTTATCCGCTGTGAACCTGACAGCGTGTTCAAA  
ATCTCGAATCCCCACGCCGATGTTTTTATGAGCTGCTTGAGCCGGGCGTAGAGGGCGGGCG  
CTTTTACTTTTCGCGTACCCGGCAAGCCGAAGAGTGCGGTGCTCCAAAGCCTCATCGCCGTCA  
ATCTTCTTTTTTGGCAGCAGTATTTCAAGCTGTTTATGGAGAGAAAGCAGCGCATGGACGAC  
GGGAGCCTTTACGCCGACGCCGCCGAGGACAGTCAAAGCAGAGGTTCTCCCGGATATAC  
AGGCAGGTGACCGGGCGTTTGACCTTTTGTGAGCGCTGAATCTTCCGCTCCGTTTCTCTTCG  
GAATAGCCGTCATACAGGGCACTCCACTCGTGGAACAGCTCCGCTCCGTTCCGGGACGAGGG  
AAATGTTATCGCACATGGCTTTCCATTCCGGCTCAGTCACGCTGTTGGGGTGGTTTTTGGATT  
TCTGCACAAAAGCGCAGCGTTCATGATCCTGTTAGCGCTGCCAGTCGTTTCCGGGTCTGCCT  
CAAACGTTTCTCTGTCTGAGGACGGGGAATTTTCGTAGTACCCTGCAAAGTCCTCAAGGGTG  
TATCGGGGACCGTCAAAGACAGAACTCCACACGGCACGGGCTCGTCCAGCTTGTGGTTCA  
GACTGCCGGGGGCGCGAAACATATGTGAGATGTTATACACGTTGTCCAGTTTCCAGCCACGC  
TTTGACGCCTCCGATATCAGCAGCTTTCCGAAGCCCCGGAGCAGACCTTTCCGCCGTTACG  
GGTGTGTCATCCGCAAGGGACACGGGCTCCTCGAAAAGGTAATAGCCGTATATGCCGTAG  
CCGGAGTTACGAAGCCCGTGGGCTTTATTTTCATATCGTCAAGAAAAGCCATTGCCGAATC  
CTTGTCCGGCGGCAGTTCCGTTTCTTGTGGGCGGGACCGTGAACGTCGATATCCGCTACAA  
AGGCGATGAGGGTTTTCCACATCATCGTCCTCACCACGGAGGTGCGGCGGCAGGTCGGCTCTT  
CTCGTATTGGGATTGATATACACATTCCTGCTTTTGGCGATTTTCGACCACGCGGTCATAGACC  
TCGGCCGCGGGGACGCGGAAGTGCTTTCTGTCCGGCAGAGTCGTTATGATGACCTCATCGCC  
GAACAGCTTATAAAATTCGCGGTGCTCCATAATTTTACACCTGTCTTCTCGGTTACAAATT

TTATGGTCATGTTCTTTTCACTCGCCCTGTCAAACCTCCGCCTCCATACCGGAACTGAGGCGGT  
CGCCGCACACCCAGAATTCGCCGCATCTGTCCATGAGGGCGTTACCAAAGGACATACCGAGT  
TTTCGTTCCGCCGGGTCGTTATCGTCCATGAACTGCGGATACAGAAGATGAGGCGCAACGGG  
GATGTATCCCTTTTCAACTGCAAGGCGGCAGTATTCTCTCGCAGCCTTTACGTTCCGCCCCAC  
ATCCCCGGAGTAGGGACTGCAGATGTACACGAGGGTCTTTTGTATCCGGCATGGCGCACC  
TCCGAAATCCTGTGCGAGGAGTTCATCGACAAAAGCTCATATTCCTCCGGGGCAAGAGCGCG  
GACGTCCTCGACCTCGAAATTCTCGCAGAGTCCGTGCAGTTCATGCCGTAGCCGATATCCT  
TTAGAACATCGGTCAGACGGATAACGGTATCGATGTTAATATCGCCTCTGTGCATCATCTTC  
GCGCTGCATTCGGCACAGTTCACCTCCGTGTCAAAGGGATCTTGTGCTCCGGCGAGAATAAG  
CTCCCCGAGATCAATCTGGATTCCTTGCCGCATACGGCGCAGCGGGTATAAGTGCTCTTTG  
CCGTGACGGGACCGAACACGACCGCGCCGTCTTCAGCTTTGTTTTTGTGTAATCATCTTCT  
CTACCTCCGCAGTATTCGTGATAAACGGAAAATCCGTCTCACCTCGTACAGGACAGGCAAG  
GACGGAAACCGTACCATATTTAATCTTTTTATAAAAATCGCATTTCGTAGCCGTCCGGCACTG  
AGGATAAGACCCGGAGCCCAAGGCGGTGTTCTGCCCATCTGTTACACAGACCACGTCAAGGG  
ACATGATCCTGTCCGCTTCGATGATGACTTCATCGTGTACATGGGCAACAATGTTACAGCAG  
CGCAGAGTCTTCATGGCGTGGCAGAGGATATCCCGGCTTGTGCGCTGGACGATGTTTTCCAC  
CAGTTTTGGGCCGTAAGTTTTCAAGCCGCTCCCACTTTTTTCGTGCCGCCGGTACCCTCATAAGT  
GATAGCCTCGCCGCCGAAACGGTCTCTCCGATTCTTGGCTTCACATAGGCAAGCCGTCTGT  
CAGACGGTAGTTTTATAAAAAGGAACCCGCTCTCATAGGAAAACCTCGACGCCGTAAGCGGT  
TGTATGCGTTTTACCTCTAATAGCCGTTTTGCTGCTCGGTCGACCGCCACCAGAATTTGAC  
GATATTCGGGTTTCGCACCGCGCCATGAATCCACGATGGGCTGAAGCTCCGACTCCTTTAGAC  
CCATCTCCAGAGCGCCATTGCCTTTAGCGCGCCACGGAACCGCCGTAGCCGCAGGCCAGT  
TCCGCAACCTTACCTTTCTGCCTGAGTTCGCCGTTTACGCCGTGCTTTATCACGGGGACGAGG  
AACATCTGCGAGGCGGTGGCGCAGTAAATGTCTCACCTTGGCGAAAGCGTCCAATTTCCA  
CTGTTCTTTGGCAAACCACGATATGACCCGCGCCTCGATTGCTGAGAAGTCCGCCACTATAA  
ACTTCCTACCGTTCTGCGGCACGAAAGCCGTGCGGATAAGTTGGGACAAGGTATCCGGGATA  
TCTTCATACAGCATTTC AAGAGCGTCGTAATCTTCGGCTCCGGCGAGAGCGCGGGCTTCGTC  
AAGGTCGGGGATATGATTTTGCGGCAGATTTTGTAACTGGACAAGTCGTCCGGCGAATCGGC  
CAGTGCGCGAGGCTCCGAGGAACATGAGCATTCCCCGAACGCGGCTGTCAGTGCAGACGGC  
GTTTTCCATCGCCGTGATTTCTTTACGGACGATTTTCGCAAGCTGCTGGCGGAGCTGCAGCAC  
CGGCACAAGCTCCGCCGGAGCGGTCTTCAGCCGTGCTGACACTTCCTTTTTTACCGAGGGTGT  
CTATCTCAAGACCGTTATCCGCAAGCCAGCCCTTGACCTGCGCCACGCTGTTGGGGTTTTTCCA  
GAGCGGTGAGTTCCCGCATGGCGTCTGTCAGCGCATCTGTTGACTTTGCATCCAGGGACAGG  
CAAGCGGAAACGAACGGCATATCCACGCCGATGCCTCGGTCGTTTATTTCTTCGGACAGATG  
GTAATCGTCCCATACGAAGTCCGGCACGGGTAACCTAGAAAAGTCTCTGCGTTATCTGCATCT  
CGACCTCCACGTGCGGGAGGTTATATGACTTGAATAAATCCCACTTTTCCGGGGCGTCCGAT  
GGCAGATTCCTCACCTGCCGCTGTTTGCCTTTGTGCGGAGCACAAGGCTGACAGAAGAATTT  
AACGAGTTCCTTGCCCTCGGTCAGTTTTTTCTTTTCAAGACCGAGTATCTCTCCGACTCCCGA  
AAGGGAGAGCGGAAGGCCGAGATAAGCCGCCCATGTCATGGAGCAGCGCCAGGAGGTTGG  
GTTCAGAAAGCGGGTGCAATCCTGTTGTGACAGCGTATGGTTATCGCGGAAGGGGTCAAGA  
CTGACACCCATATCGGCGAGGTACCGTGACAGGCACACCCGCTCAAATCCGCTGTTGTGCGC  
CCATTTGACAACCTGTATCGTCCGTAAGGGCGTCGAGAATATCCTGCGGTAGTGTTCACCTT  
GCAGAAGGTCAACAACCTTCACTTCGCCGCTGTCCACGCTGTATCCGAAGAGGATAATCTGA  
AAATCCGGGGATTCCGGCTACTTATACTCCGCATTTCTGAAGGCTCACGCTGCTGAATGT  
CTCAATGTCGATTTCAAGAGTCTCATCGTCATCTTCTCCTCGCAGTATCCGCCGTCTCCG  
AATCGTTGAGGCATCTACCCTCGATATAGTCGAGGTAATCGTAATAGCTGTCATCGAACATA  
TTCGTTTTCTCCATAAGAAAAGCGGTGGAGAAAGACTGTCTCCCTCCACCGTCCGTTCCGTTT

ACTGTTTTTCTTCGTTATCCTTGCGGATGCGTTTTTCTCTCTGCGCTCATCTATCGCAAACCTT  
TACGATACAGATTGCGTTGCCGATAAAGGTTCCCTACCACGGCACCGAAGCAGACCGCAAGC  
ATCATTGACTGGATGTTTGTTCATAGTGTGACACCTCCCTTAACCCAGGAAGTCGTGCGTCCGC  
ATCACTCTGATAGCCGTCGCTAAAATCGTCTTCAGCTTTCGCTTTGCCGCCGAGGGATTGCCC  
GTCCTTGATTTTCTGGATGTTCTGAAGACCGCAGGCGACGCCTTTATTGCCGTTAGAATTTAA  
AGCATAGAAGCTGAGAGACACACGGGCATACACGCCGGAGTAGATTTCCGAGGTGTGCAAG  
ATGGGCTGGCAGTGGACATCCACGACGCCGGGAGCATTATTGCTGTTGGCGTTTACGAACCA  
GCAGCCCTGGTACGCCTCATCATCTGGGCGTTCGACATCTCCGTCGCGGAGGGGGCGTTTTCA  
GAGTGGAGAGCGGAGGCACAGTTTTGCGCTTCCGCGCAGCTTGCCCTGACCTTCCTCGTAG  
GCCGCCTGAATAGCAGCCTTGATCTTGGTGACGGTGACGGTGTGCGACTTAGGGATAAGTAC  
GGAAGTGGAGAATTTGGGCGCGCCGCCGTTAATGGATTTTGCCTGCCAGATATTTGCGTAGG  
AAAGACGGGCAAGGCCGTTACTACTTTTGTGGGGTTAACAGTATTTGTTCATGATAATAATC  
TCCTTAATTTTCGTTAGGGTCGGCGAAGTTATCCGCCGCCGTTTAGTTTCGTTACGCTTGTC  
CGATGCCGGAACAAGCACCGTTTTGCCTTCGGGTTTGCAGGTCAGCCCGCCGAGCAGTTCAT  
CAAACCTCTTCCTGCCGAGAAGCGAGGTCATTGCCGTTATTCCGAGCAATTTGTGTTTCATAG  
GGGTGCTATCCTGCGTCTTGACCGCGGCTGCAGCGGCATCATCATCTGTGTACTTGCGGTTG  
CTTCTGCCGGCCACAACCTTCCAGCCGTCATACTTCGTGCCGAAAGTGCCTGGGCAAGAGC  
GTAGTCCTTGACGTCCGACGCCAGGAAACAGTTCGTCGATTTTGCCGAGGATGTCCGCCA  
CCTCACAGATTTGAAGTAGAGCGGGTCTGTGAAGTCATAGACGGCAAGCGCCATATTTGCT  
TCGGCTCTGGTCTGCATTCCGTTTTCGCTTGCAAACCGGCAGTGATCGCCGGCCGTATAG  
CTGCCTTTGCCGTCCCATGCGAGTTTCGCTGCCGGGACAAGCACGGTTTCCGCCCATTCGATA  
AGAGCATCCGCTGTGGTTTCCAGGTCTGCACATTTCCGAGCCTCGGCTGATAGATGCTCAT  
CCGCACGGTATCGAACCGATAAAGGAAGTCGAACATCCGCATGGCACCGAGGGTGTAGATG  
CGAAGCTGGTCATTATCTACTGCATCAACTTTGACTCCGCGCCCGCTCTTGAGATCAATGATG  
TGCAGAACCGCGTCCGATACGATAAGCGCGTTCGAGGTGCCGAAGCATTCCGGGACATAGA  
GGGAACAGTCAACACGCTGCTCGACAAACACAGCCGGGTCTTTAAGTCCTTCCGTCTGCTCC  
ATTACGAAGTCGGCGTAATCGGATGTGTACTCATCCATTTCCGCGTTCGTGCAAGCAGGAGC  
GTTTTTGGCTCTGCCGAGCCGATGGTTGAGTTTCCCCTCTGCCACACTGTGGGGCAGGGTGC  
TTCAGAGGCGTAGCTTGATAACGAGTCCGCGAGGAACTCTGTAAGCCGAGCCGACGGCGGA  
CACGCAATCCACCTGTGGCTTGCCGAGGGAGAGAGGAGTGCGTGGCTCAT

>BTF08-2

ATGACACTATACTATCAGGACGACTCTGTCCAGATATTCCAGGGAAGCTGTATTGAAATCCT  
TAAACAACCTCCCCTCGCAAAGTATAAACCCTCGTTACTACTGACCCACCCTATGGCATAGATT  
TCCACGGCCGGGGTAAGGGTGGGAGAAAATAGCCAACGACAAGTCTTTTACAGCGTGGC  
CCAGCTGATACACCAAGTAATTCGGGAGCTGGTACGCTTGCTAAAAGATGATGCCGAGATTT  
ACTGGTTCTGCTCCGGTGGCAGCCAGAAGCCTTTAATAGCCCAGGTCTGGCTGGAATTCATA  
AAACTTAAGCCCCAGCTCCTGGTCAAAAACCTGATTATCTGGGACAAACTTTATCCCGGACT  
TGGTTGGGACTGGCGGTTTCAATACGAAACCATATTCCAGCTCTGCAAAGGCAAGGGGATTA  
AGTCAGATGACCACCGCCGGGGGAATGTAATATCAGCCCAGAAAATAATACCCAAATTCGG  
CGAACATCCTACTCCGAAAAGCTCTGAGATTATAGAGAAGCTATTAATCCCCAAATCTAAGC  
CGGGCGATGTTATACTTGACCCTTTTCTTGAGGGCGGTACAACGGCTGCTGTGGCCAAGAAA  
CACGGCCGGCAGTGTATCGGTATAGAGCTAGTAGATAAATACTGCGCTCTGGCTGCCGAAA  
GATGCCGGCAAGTAAAAATAAGAGAGCAATTGTAAGTCTAGCTCGTACCATTAACAGTTAA  
CCTATAGGTTATCTGCTGATGATTGGAGTATTGTTACAATCGCTCTCTAGCTAAGTCAGCCAA  
GTCGTTATAGCTCTGGGATTAGCCATTTCCAGCACAGCTAGCAAGACTCCTATACTCTTGG  
AAATCCCCTGGTATAGGATTGCCCATTTAGCACCTAAAAGAAAATGTTACGACTACCATTC

GCATTCTAGATACTAAATAGCGTGCAAATTACTCTACACCTTGCTCAATGTGGACTCAGCGG  
AGGTAAAAATAGTTTTCGAAACAAAACATCTTCCCTCCTAAGCATACCCGGTTTAAATCACC  
TGGCAGCTTGTTTCGCATTATAATATCAGGTAAATAAACTTATCAATAGCTTACTATCAAATCT  
GACGCAGGGAAGAGCAGTGGCAGTTCGCTTGGTTCATAACCAAGCGAACTCGATTCAACTCT  
GCTCTCTGCTACCATGCTGGGGTAGCTCAATGGCAAAGCATTGGAGGAAGCTGTGGTGAAA  
AGAGCTTGGGCAGAAAGCCCGTCTTAACGGCGGACTTACTATTTCCAGTGATTTATCTTTCC  
CAGCACGATGGGGTTTCAGGTTTCTTCACATCCGATCTTTGCAAATATATTACAAATCCATGC  
AATACAGACTCGTTTTCAAATTTAACAAAGTCTATTTTCATATCTATGATTTCTAATTCAGGG  
TTTAATTCTAAGAACCGTGCAATATTTTTTTCAGTTTGGTCACCACAGTCATAGTAAATTTGC  
ACTTCTTTAGCCAATATTGGTTTATTCATTAACATTTAGCCCCCTCTTTTTTAATATGATAACC  
CAAATACTAGTATTCCCGCAATCCGTAAATACACTAAAAGGGATAAAATATTGGAAGTAGC  
AGACGTTGTCATAAAAATACTGATTGTTCTTTTGGCGGGGCCGTAAATGACAGAATTAACCCCT  
AAGACGACGGGCAAGGTGCTTAAGACGTTACCAACATCTTGCATTTCTTCGCCTAAGGTCA  
TCTTATCATCATCTTCCGTTAAGTTTGAAATCAAATACAAAATAAAAACTACTACTGTTAATA  
CAGCGGCGATTATCACAAACATGCTCAAGAACAAAGTTCCAAAAAACCTCACCCTGCGATT  
AGCGATAAAAATCGTAGAGGCAGCCAATAATATGCCAGCAAGAATAGTTGCAAGTGACAAA  
TGAATACGCTTTGTTAAAGCCAGAATAACGGAAATAGCGATAGCAAGGATATAAAGGGCAA  
TCCACCACCACAGCATTTTATTACCCTCCCGCTAGAGTTTTCTGGATTATCCGCCAAGAGGAA  
TAGTTAAGCAATAAGTTTTGTATAATCGTTGAACTTCTGCTGCGGTTTCAGGAATGGATGCC  
CGTCAGCCAATTGGGATTCAATCCACATTCTCTTGTGGATAGCCAGACTTTCAAGGGCTTCTT  
CTGGAGTGTCTCCATCGCCTATGCAACCTGTTAATTCTAAGGCTCTGGCAACATAGTAAGTC  
CCGCCGTCATTATCTTCGTCTGGTTCAATGACTACTGTATATGGCAATCCCATGTAGTAGTCC  
AAGTTCTTTGAGATTGTTTCCATAAATTAAGCCTTACGCTCAGACAGTTTATGCACCATGTAC  
GTATTCAGGCTGACGTTATTCTGCTCAGCTGCCCTGTCAAGTTTGGCATGAAGCTCTTTGGGC  
ATACGCACCACAAACCGCCGCTATACTCCCGCTCGGTTCTGGGAAGCGGAATATCCTGCC  
ATCTTCATAAGCGGTTTCTATCCAGAGTTGACGGGCCTCCTGAATATTGGCAAGTGCTTCTTC  
TGAAGTATCACCCCTCAGAGAGACAACCAGGAAGTTCTTCAATTTCAACTACATACCCGCCCA  
CTTTTGAGGGAATAAGTTTAATTGGGTATTCCAGACCAAGGTAATATTCTAGTGGTTGACGT  
CTAGTTTTAATAGCATTGTCATTCTTAACTCCTATCCAAGCTGGGGATTATCCCCCAGCT  
TTAGCATCTTTGTCATTCGTTCTACGTATTCAGGTCTAACATACTTTGATGACTTAGGGCTTA  
TTATCGTGATTGGCATTGAATTTGCTTTGTGATAAACCTTGTGACTTCCTGCTGACCTTCTCA  
GTTTCGTAGCCAGAAGCGATAAGAAGTTTATCACAAATCAGCTTCAGTTACTTTGTTTGGGTTA  
GCCTTTATCTGGTTTATCAGTTTCTCTATACTCATCGCTCAGTCCTAATTTCTTATACTTAGAT  
GATACTATATTTAGTATCATATGTCAATACTCAAGGCAAATATTTTTACTCCGGGGGCGGA  
TATGCCCAACAAGAACTAACAGTCAAGCAAGAGAAATTCGCAGTTACTTACTTCAAACCTTG  
GCAATGCTACTGAAGCAGCAATAAAGGCCGTTATTTCATCCAAGACTGCTGCCGTAATAGCT  
ACGGAAAACCTAAAAAACCTAATATCTTGGAACGCCTTGAAGAACTGCAGGCTAAGGTCCG  
CTGCGGATGCCGTCATGAGCGTTCAGGAGCGTAAGGAGAGGCTGTCCGAAATAGCCAGAGC  
AAGACTATCTGATTTGGTTTCGTGCGGGCCGGACGGCTCTGGATAAATGTTGGTATAGATG  
GATGCCAGAGCGCGGCCATCCTATCAATTAATCCTCTACCGAGTATGACAAGGACGGAGA  
CCACCCTACTGTCATTACAGATATTAACCTCCATGACCCGGTTCCGGGCTATCGCCGAGCTAA  
ACAAGATGGAGCATATCTACGAAACCGGAACATTACTCAACATAGATGCACGCAGCATAAA  
TCTAAATGTTGAAAGTTACACAGATGACGAACTCATCAGAATTATCAAAGAAGGTGAAGGC  
AGCACGAGAATTACTAAGAAGGCGCCAGGCCGAAGTAATCTTCTGGATTTTACCCGGTACA  
CTTATCCAGACTACCAGGCTAACTGGCATCATATTGAGTTATGCCAATATCTGGATAAATTT  
ATTTAGGTGAAATAAACGGCTCATGGTGTTCATGCCGCCTCAAACGGCAAGTCTGAACT  
TGTATCACGGCGTCTGCCGGCTTTCATTCTGGGCAAATTCCCGGATGATTCAATAATAGCCA

CCAGTTACGGGGCTGACCTTGCTTCTATGATGAACCGAGATGTGCAGCGGATTATTGACGGA  
GACCAGTATCCAGTTTTGTTCCCAGATACTAAGCTCTTCGGTGAAAATGTCAGGACAGTATC  
TCAAGGGGCATACCTGCGCAACTCAGACATCTTTGAAGTAGTTGGGCATAAAGGCTACTACA  
AAAGTGCCGGCATCGGTGGGTCTATTACAGGTATAGGCTGCATCTGGGGAATAATAGATGA  
CCCTATTAAGAACCGGGCAGAAGCTGAATCTATAACCTATCGCAATTCCATATGGGACTGGT  
ACACCTCAACTTTCCAGACACGTCTCCGCAAGGATGCCAGAATCCTTTTTAACCATGACACGC  
TGGCACGAAGATGATTTGGCCGGGCGGCTGCTTAAGCTGGCAAAATCAGACCCCGCAGCCG  
AACAAATGGACGGTAGTTTGTTCCTCCCGCTATTGCAGATGGGCAGCTAATGGACTGTGACCCA  
AGAAAAGCAGGTGAACCTCTTTGGCCAGAACGCTACTCATTAGAAACACTGCTGAAAATA  
AGGCTACTTCAGGCGGTTATGGCTGGGAATCTCTTTACCAGCAACGGCCATCATCACCGTCA  
GGCAATATTTTAAACCGTTCCTGGTGGAAATATTATCGGCAACCACCTTCAAATTTGATTC  
AGTTATTCAATCTTGGGACTGCTCGTTCAAAGATTCCGCCGGCACCGACTTTGTGGTTGGCCA  
AGTCTGGGGCAAGGCGGGAGCTGATAAATACCTGTTAGACCAGGTAAGGGCCAGAATGGAT  
TTCCCGGCTTCTATTGCCTCTATATTAGCCTTGTGAGCCAAGTGGCCAAAGGCAACTGTGAA  
ACTGATAGAAGATAAAGCCAATGGCCCAGCCATTATATCCACCCTGAAACACCGAATAGCC  
GGGTAAATCCCAATTGAACCGGCAGGCGGCAAAATAGTCCGGGCACAAGCGGCCAGCCCGG  
ATATCGAAGCCGGCAATGTTTACCTGCCTGAAAACACCAGCTGGGTCAACGACTTTGTTGAA  
GAGTGCGCCAATTTTCAAACGGAGCACATGATGACCAAGTGGACGCTATGAGCCAAGCAA  
TAAACTACCTGAATAACTGCAACACCTATTTTGATGTGGGTAAACGGAGCGAGTATGTTAG  
ACAAAATCCGAAACAAAATAGCACTATCCATGCTGGATAAGAAGAGCTTTGATTTAACATC  
GCCGGAATTTGTTCGGCTTCTTCCAGGGGCTATATTCCATGTTTTCTTGCCCGGCAGACCAGT  
CTACACTGACATACCTGCCTCAAAGCCATCAGGGAAGGCTATAAAATGGCTATACCCATCT  
ATCGGGGTATCAGGTCATTGATTCAAGCGGTCTCCGGCATAACCATGGATTGTACTGGATAAA  
AAAGGCGAGCAGATACCTGACCATCCTTTTGTCCATGCATGGAATTATCCCAATCCTGAATT  
TTCCGGCCAGGACAATATGGAATACATTGTCGGCCACTTGATGCTAATCGGTAATGCTTATA  
TCCGCCCAGATATATGTCAACCAGCAGCCTCGCGAGTTCTGGATGGAAATGCCCGACCAAATA  
CAGCCTATTCTTCCAGAGACCGTAATAAATGGCTGGAAGGCTGGCAATATACGGACGAATC  
AGGTGTCAAACATACAGTAGCCAAAGAGACCTTTATTCAGTTTAAGCAGATAGACCCAGGT  
AATTTCTATACCGGTATGGGGGCTATCATGCCAGCTGGACGGGTTATTGATATCTACAACGA  
GGGGCTGGATACCCAAAAGGTATCTATGCAGAACCGGGGTATGCCGTCAGGTCATCTCTTCC  
CGGAAGAACCCTTGACCCCTGAACAATTTGACGACTTCAAACGCAAATTTCAAAGAGAGTTAT  
CTGGACAAATCGTCTCGGAGAATGCCCTGGCTTTATCCCCGCAAGATGAACTGGATAGAAGC  
GAATATGACTCCGATAGAGCTGGATTACAACAATTCGCTCTGGACTAACATAAGACAGCTGG  
CTGCCGCCATTGGTCTTGACCCCTGGTGGTTGGGAGACCGCGAGCATTCCTCTTTAATAATG  
TGCAAGAGGCCCGTAGGTCTCTATATGAGGACAATGCTATCCCCATGCTGGATGATATCAA  
TCCACTCTCAATCTCAAGGTGGCTCCGCTGTATGGCGGAGATATCAAATGCTTATGACGT  
ATCTAATGTTACAGCTCTCAGGGAAGACTTCAGCAAGAAGAGTGAACAGGCTGCAAGGTTA  
TGGAGCATGGGTGTCCCTTAAAGCAAATAAATAAGATTTTGGAACTGGGCATTGATGAATT  
CCCAGGTTGGGGAAGGTCATATTTACCATTTCAGCGTAGCCCCGGTTATGGAAAGCGGGCTAC  
CTGAAATAGTGGACGAGCCAGAGACCACCGGGGCTAAGTCACTTCACATGGACATGACAGA  
GGAACAAAAGGTAGCCGAATGGAAGCGCATAGATTCCC GCCGATTGGCTGGTGGGGTGT  
CTGGAAAAACGATTCGAGCCTCTATATACCAAATTTGGGCAGCGCCGTAGCCAAAAACCCG  
ATAGCCTTGATGATGTTTTCAAGAGCCTGTCCCCGAATGGGAAAAGACTTTAACCGCTATT  
ACCCTTACCCTGATAGAAGATTTTCGGCAAACAGACCGCTGACCGATTAAAAACCAATAATCA  
GTTACTGGAATTCAAATTTGACCCATTCTCAGCGGCAATTAAGCTTGGGCTACTGCTCAG  
CTGCCGAATCAGTTAAACTATCATGGAGACCCAGCAGTCCGCCATGCACGACCTTATAACC  
TATGGGATAAGCAATAACCTCTCCAACACCCAAATAGCCAAGTCAATCAAGCAATTTTATAC

AGACAACGCCCGCAGTCTGGCAATGCGAGTTGCTCGGACTGAAACAGCTATTGCAGCCGGA  
TATGGTCAATCGGCTGCAGGCAAACAATCAGGGGCTAATAAGCGCCGCTGGCTATCAAGTC  
GGGATGATAGAGTCCGGGATGCTCATGTTGCTTTAGATGGGCAGACAGTGGGCATTGATGA  
GCAATATTCCAATGGTATGGCCCATGTGGGTGACCCGGCTGGCGGGCCGGAAAATATTATCA  
ACTGCCGATGCGTGGAACAATTTTTTAAGGAGTAAAACAGGTGGAAAAGAAAACTTCCGA  
TTTCAAATGAAGGAGTTTGACGAACAAACAGGAAATTCGAGGGAATAGCCTCAGCCTATC  
GTAAGTCTCCCGATAAGGTCAAAGATATTGTGGAACCGGGGTCTTTTACCAAACCATTAG  
GAAAACAACAACGGAGTTATGCTCACCTTTCCTCCGCATGATACTGATTACCGATTGGTAT  
TGGCCCGATTACCGATAGTACGGACGGTATCGTAGTTAAAGGGCAAATCCTTAGAGGTATCC  
AAAAGGGCGAAGAGGCTTACCTGCTCATGAAAGCCGGGGTAATCAGGACGCTGTCTATAGG  
ATACGAAGCCATCAAATGGGAAATTA AAAACGGCATCCGGCATCTGCAGGAAATAAACTA  
TATGAGATAGGGTTAGTACCGGGGAATTCGCCGCAGATGATATGGCAGTAATACACAATGT  
TAAGGCGATGACCTTTGCAGAAGCCTTAACAAACGAAGAGCTTATAAGCAAACCTCTGGCGC  
ATATTTAGCACGATGGAAAACGTAATCATGGGAATTATGCGCGATGAAGAGGAAACCGATA  
AAGTCAACTCTCTGCGTCAAGCTGTTGATGAATTTTCGGGTACCTTTAATAACTGGATAGAC  
GCAATGGAGAGTAACGGCGCTTTCAAATCGGCTCTTGCCATACTCGCAAGAAAATCAGGCC  
GGATATTGAGCGCCCGAAATAAAGAAGCAGTCCAACACGCTACGGATGTCTATTAGCACTT  
CTGGCCGAAACTGAAGACGAAGCGGAGCCGGGTAAAACCACTCCCCGCCGGACGAATCAA  
AGGAAGCCGCACAGATAGACGCTATCCGGGCTAAATTATGGGGATTTGATGCTAAAACAGC  
TGATTCCCGAATAGACGAAATTACAAAACGAATAGGAGTACAAACACATGTCTGAAGGAAA  
ACAGGAAGTAAAACCGAGGATATTCTTGCTAAGGTAAATGGCCTAGCCGATGACCTTCTG  
AATTGGAGAGAGCGGGCTGACCAGGACATCAAAGCCGCCGGCGAAATATCCAAAGAAACC  
AAGTCAACAATTGCCACTTTGGAAAAGAACTTGATGACCTGCACGTACGGGTTGAAAAGA  
GCGAGACACCCGTAGGACTTCATCCGTCCACACCCGGTAAGAGCATTGGACGCCAGTTCATC  
GAGTCCAAGCCTACAAAGATATGATCCAGTCAGGGA ACTATGAATCTTCCCGGTTTGAGGT  
CAAAGAAATCATTTCAGCAACCTTTCCTCAGCGGGT GACTTGATAGTGCCTGAGCGTGTAC  
CCGGCATAGTAGCCGCACCTGAACAGGCTCTCCGAATCAGAAACCTACTCGCTCCCGGCAAC  
ACCACCTCTAACGCCATAGAATACATTGAAGAGACACTCTTCACCAATGCAGCTGCAGCGGT  
AGCCGAAAGCGTTCAGGGGTCTGTCTGTTAACAAACCTGAATCTACCCTGCGCTTTGACAAGA  
AAGTTGCCAGCGTTGGCACATATGCGCACTGGATTCTGCTTCCCGCCAGGTCATAGCTGAT  
GCTCCCCAGCTCCAGAGCTATATCAACGAGCGCCTCACTTATGGGCTTAAGTTGGTAGAGGA  
TGGCGTTTTGGCTGATGCTTTGATTGATGCAGCCACTGCCTACGACGAAACTCTGGAGACTG  
CACTGGGCGTTGAAGCCATAACTCGGATAGACAAAATCAGAGTGGCCATTCTGCAGGCCCG  
GCAGGCTCAGTACCCCGTCTCCGGCATTGTCATTAACCCGTTGATTGGGCAGCTATGGAAT  
TGCTGAAAGACACTCAGGAACGCTACATCTGGGTATCAGTTGTTGATGGCGGAACTGCCCGT  
CTGTGGCGCGTACCTGTTGTTGAAAGTGATGCCATAGAAGCGGGTACATTCCTGACCGGCGC  
ATTCCGTCTGGGCGCTCAAATTTGGGACAGGGAAGGCGTTAGCGTCCGGGTATCCGAACACC  
ATGCGTCTTATTTCAATCAAACACGGTTGCTATCTTGGTTGAAGAACGCTTCGGGTTGACCA  
TCTATCGGCCTCAGGCTTTCGTTTACGGCTCATTAGCTCCGGCAGCTAGACCAGTCTTTAGG  
CCAACAAATTAAGCTACGGGGGGGCATTTCTGCCCCCCCCGTACAGTATGAGGTGATATGA  
AATGGTGGTAGTA ACTCTTAGCCGGCGGACAAAACAAGATAACACCTGTTCAAACGTCAGTA  
GTACGCCCAATAACAATTGTCCAGACCGGACTATAAACACCCTGATAATATAAATCCAAACCA  
GCGGGTGGTTATCATGGCAGCGGGTGTCTGCCGTAGATGGAACAATTATCTGGGTATGCCAA  
AGCAATTGGCTCCCGTAAACGGTGAACCCATTATCAAACGGACTATCCGTCTCCTTAAAGAA  
CGCGGTATAAGCGATATCTGGGTTACTGTCCGAACGGCTGGCCAGTATGGAGATTTAGGGGT  
CAGAGAGTACATCAATTTGGAACATAACCAGTACTCAATAGACCGTATTTACGGGGCACGTG  
AATTATCACCAGCCATATATCTGTATGGCGATGTCCATTACACAGAACCGGCTATTGATACC

ATTCTGACCGATACTAATGATTTTCAGGTTCTTCGGCCGGAGACATGCCGGCATCATCAAAAA  
TAACAGGGAAATTTACGCTATTAAGCTAATAGCTTCATCATACAAAAGGCAGAGGAATTA  
AGGGAAATGCACGCCAGCCACCAGGTAATTAATCACTTGGCGGGCATCTACTTATTCATTG  
TCTGGGTATACCGATTAATAAACGCACCAAAGACCACACAGCAGACGATGCCAATTAACA  
CCCATGCTGACCGATATAGATGATGAGACCACCGACTTTGATTATCCCGGTGAGTATATCAA  
ATTTCTAAAGATACTTAAGCAGCCGGCACTCGTACCTATCAAAAAGACAATTACACCTCAGT  
ATATTAACCAACCTGTCAGGAATTATTACACCATTGACCGTTTGACACATGACCTCATC  
CACGAATTCTTACCCAAAATACCAGACGTAGATTTAATAGTGGGCATACCCAGAGACGGGA  
TGCTAATAGCTTATCTGGTATCAATATATCGCAACATCCCTTTTACCGACCTGGATAGTTTCA  
TATCAGGGCATATTTACCAATCCGGCATCAAACACCGCAAGGAGAAGACCGATATAAAGCG  
GGTTCTGGTTGTAGATGATATCTGTGCCTCCGGCAATGCCATGAAGGATGCTAAATCCCGAA  
TTCCCTCCGGCGACTATCAGCTGTGTTATGGCGCAGTATATGTATCAAAACCGGATGAGAAA  
CTAAGGGTCGGCATTATTGACTGTTACGGATGTGAACTGATTGGCCCTCGTCATTACCAGTG  
GACTCATTGCGATGCCGTCCACTTACCCGGCACCATGATGGATATAGACGGGATTCTATGCC  
CAAATTGGGACGGTGAGGATGATAACATCCAATCATATGTGGATTGGCTTCAGACTGTCCCT  
CTCAAAATCAAACCTCAGAACATAGGCACATTGATTACCTGGCGGAGGGAAGAACATAGAG  
CTATAACCGAAGCATGGCTGGCCATACACGGGATTTCTTACGGTCAGCTGATTATGTGTAAT  
CGTAACCAATGGGCCAACGCTGCAGAATTTAAGCATCGTTCTATGGAAAAAGTGATGCC  
GGTTATTCATTGAGAGTTCGGCCAAGCAAGCTGAGAGGATTTATCAACTACCAAAAAGACCA  
GTTGTAGCCTTTGATACTAACGAAGCATGGGGGTTAGACGAATGAAAATCAGAATTCCTAAA  
CCATTTGAAACTACTAAGGGCAGGCTAATTAAGGGCAATGTAATAGATATCACGCCGGCGG  
TAGCCCAACGCTGGATTACACAAGGTGACGCAGAGCCAATCAGAGAACCTGTTAAGAACT  
TTCTCCTGAGAATAAGGTTATTACTCCCCCTGAAAATAAACCCACCCGGCGCCAAGCCAGAA  
GGGCACGAAAATGAGCCTATCTGAATATGCGATTGTAACCCTTGAAGAAGCCAAAAACTTCT  
TGCACGTTGATGGGGATGATGATGACTTAACTTTAGAGTTTCTGATTGAAACTGCTACTGCA  
AAAACCGAGGACTACTGCAGTTCCTGTTGGGTCAAACGGGGTATAACCGAAACTCACATTG  
GGAATGGCAAACAAGCTATCAACCTATATCGGTTACCTGTAGAAAGCGTTGAGGCCGTTATT  
GTAGATGGGGTGGAACTTGAAGAATCCGACTATATCGCCCAACTCTCTATCGGGCGTTAAC  
AGGCCGGATATGGCAGAAAGACTCTGTTATTGAAATTGCGTATACAGCAGGATATGCCGATT  
CTTACGGGCAGGCAGCTATACCGTATGCGGCTAAATTGGCAGTCCTTAATGCCTTGGCAGCC  
TGGTGGAAATAACCGAATGGGAGTAACCAGTGAAAGCATCGCCGGCATTGGGTGCGGTAGCAT  
ATACCGGCGAAGAGGAATTGCCGAAAACGCCAAGGCTAAGCTCTCATCGCTCAGGAAGCG  
AATATTATGATAACCAATTTTATTAAGACCAAATGCACTATCCAGAATAAATCTTCAACCAC  
AGGGGCTATGGGCGAAACTGAAGCCTGGGTAAATGGTGAGACACGTTGGTGCAGGCGTATA  
TCCGTTGACGTGATAACCCGAACGGCCTTTATGCAAAATAATACCATCGTGACTGATAAGTT  
TCTCTTTGATGGCATAAGTTACGCTCTCTCTGGGCAAACAAAGAATATGCTACCAGGGCGTTA  
TCTATGAGTTGGCAGAGTCAGCCCAATACGTTGAAGGAAAGACTATTGTCATGACTAAGCGA  
GGTGGCTAATGGGTGTTGACATCGCCTTTCGTGAGGATATATCCGGCGTCATAAACAAGATA  
GACGAAACCGCAAGGGAAAGAATGTGGGAAGCGGCAAACCTCGTCAGAAACACAACGCTT  
GAAAACCTCTCAGGGCCGCGTTCCGGTAAGGAATACTATGTACCCGGCACTAAAACGAAAT  
ACAACGCATCAACTGAAGATGAATACCCCGCAGCCGCCACCGGCCAATTAAGGCAGTCTCTT  
AAAGCCTCTGTCGAGGTTGACGGGAAACAGGTCGCGAAAGTATGGCGAGAGCATGGGTCAA  
ATGTAGATAGCAAAATAGAACCCACCTCAGGTTCAAGTAAAACATAAATCGGGTATGTTGG  
AACTGAGGTAGTGTATGGCCCGATGCTGGAATTCGGAACATCCAAAATGAAGGCCCGTCCA  
TGGCTTAAGCGTTCGTTTGTTCAGTCTCAGAAGGTGTCAAAGATATTTTTATGCGAGTGTGG  
TTTTGATGGATACCAAGCGGCATTAATCTCAAAAGTATATGAGACTCTGACAGAAGATAGC  
CAGCTGGCAACCATCATGGACACTATCAGAGTACATCCGATAACCGCCCTGCTGATACGCC



GAAGCCCTATATAGTCCATGAGCTCTCACTTCGGGAGACAGACAAACCCTTTCCCTTCTGCA  
CAGGCGGGCTGACAATCCATTTGTGGGATACAGGCAGTAATATCACCCGAATCCTAAGTATG  
CGTTCGCGCATCATAGCCTTGTTGACCAACTACTCTATAACGATGAAGACATATCGGGAGC  
CAGATTTAATCTGCAGGCAGATAACTTCGTCACTGATGAGCCGGGTATTTATCATTATGTAA  
TCTTGTTTGATATCCGTCTTTTTAAAGCATCTGAAGCAGAATCAATACTGGAGAGAGAAGGG  
TTCATGGGATAGCAAATCGAGGCATATTTACTTTTTCCAAAATATTAGGAGGATAAAAATGAA  
AAGCGGATTAACCACGGAAACAAAAGAGAACATTGTCTTTGGCCCTGGTGAAGTACTCTTA  
AATTACAACGAGGACACCGGGGTAGGAACCTCCTGTAGGAGCAACCAGAGGCGGGGGTGAAGT  
TTAATTTAAACCGTACCTTGCGCCAGATTACGGTTGACGGGCAGCGCGGGCCGTGGAAGGGC  
AGCCAGATAATGGATAATGTAGCCCCGACCCTGACAGTTAGAATGCTGGAAATTACCAAGT  
CCAATCTGCTGGCCGCTATCGCCGGAGCTGTTGAAGATGCAGACGGCAACATCGTTGGCGGA  
GATGTAGCAGATGCTTCCTATCTGGACAACGTCACAATTGTGGGTGAAGATGCTAACGGGAA  
TGACTTTATATTCATACTGTACAACGCTTTGCCCATCTCAATAAATGCTTTTACTCTACCTGA  
TAAAGGCGAGATAGTTTCAGAAGTGGTTTTTCAGTGGCCACTTTGACCCCACTGACCCGGACT  
CTGAGCCGTGGAAAATCATTCCCTGTACCGGCAGGTAGTTAACAATGGCCACACAGGAACTG  
CAGGTACGAGAATTACAGATCAATGACCTCTTCTCCCTGGCCGAAATCATACTAAAGGCCGG  
GGAGAAGACTAAGAAACAGATCTCCGAGGCAATACAGGCCACCAAAGGCGAAGGTGAAAA  
AGACACCGAACACCTTGGGCTGACAATAATCGGAGTATTACTGGTAGACTGTAAGGACGAT  
ATCAAAGCCTGGTGTGGCTCGGTTTGTGGTATAAGCCCGAACGAGTTTGGTCAAGCCAGCTT  
AAAAGACCTTGCGGCATTATCCGGGGGCTGAAAGACCAAGAAGGATTTAAAAGTTTTTTAG  
CCGAGTTGCGGGGAATAATCCCCGCCAGGTTATTCGGCTAAAAGAACAGATAATGGACTCTC  
TCCAATCCAGATACCACCGGCCTATCGCTGAGTGCCTGATGATGTCTTGTACACGCCTGAGC  
GTAATACAAGACATGGAAACACGAGAATTTCTGGGAGAAGCTCGTTACCAGTGCGTTTACGG  
CATTTCAACTTGGTGCCGGCGGCGACAAGCCATTTCTGGAATATCTGTCCGCTATTGGACTC  
GCAGATAAAACCGCCGCGCAACAGGTTAAAGCAAAACCAACTACTGCCGATATCCTGAAAA  
AGTCCCAAAATATACGGGAACGGGCGGTAAAACAGAGAATGAAGGATAAAATTGCTTGACA  
TCTCTTAGCTGGGGTATATCGTAAAATGACTATTTGCCAAAGAGGTGACACGCAATGAGCCT  
GATGGACAGAATGCGGGCAAAGCAGGAACAACCTGCGCGATAGCATGAACGAGAAGTTTGAT  
AATTCTATCCACAAGCGCGAAGAGTCAATAGCTCGTCATAGGCAAGAATATGAGCGTAGCC  
GCCAGAACTAAGGGAACCTTGACCAACTGGCAAAAGAGCGTAAATCTCAACCCCTAGTAC  
GCTTCAAACAACCCTGCGCGTAATAGGCCTTACATTTTTTGATTATTGGGGTAATCGGACTAA  
TGCTTATCCACTGTTAAATTTAACCGGGTAATAATCTTAATTAACCCTCTCCCAAGGGTG  
GTTTTTTTGTGCCCCAAAATAAGGAGTCAAGTAGTATGGAGATATTTTCTCTCGTAGGCAAG  
ATGGCACTTGAAGGCCAAGCCAGGTGCAAGAAGGCCTCAAAAAGACAAAAGAACAACC  
AAGCAAGTTCAGGACGCACTCAAACCTGTTGGGAGCGGCTTTTACGGCGGTGGGTGCAGCTG  
GAATTGCTATGGTCTCGTCTGCCCGTAAGCTGAACGCTGAACTGGGACAAACAGCTATTACT  
CTGGGAGTATCCACTCAGGATATGCGCGACCTGGCACTAGAGACCACAAACGTGACATTCG  
GGCTGGAATCAGTAGTAGCTACCTTCGGTCTTCTAGTCCGAGCAGGAGTAAACAATACCGAA  
CAATTACAGGCTAATGCCAATGCCTTTGATGCTTTAGCTGATGCAACTGGTTCCAGCGCTGA  
AGCTGTGGCCGGTATTCTTATCCCTGCTATGAAGAATCTAGGAGAGCAATTGCCGGAAAAC  
CCACCGATATGGATAAGTATACGTGGTTAACCAAGAACACTACTATCGTGCTTGAAGACTTT  
GGCTCGGTTATGAACTACGTAGCCGCTTATGGCTCTAATCTGAACCTGACAGCGCAAGAATT  
GATTGCCACTCTGGCTGCTCTGGAAGACAAGGGCATATCGGGTAGTGCCGCAACCAGATTGC  
TGAGAACCGCTATAACTCAAGCCGATGAATCCGGTGTATCTCTGAATAAAAATACTCGGCATA  
ACACAAGCTGAAATTGATGCGTATACAGCCAAAATGAGCGCTGCTACCGGTATAACTGATG  
AGTACGCCGAAGTCGCTAACTCCCAATACGGAATCATGGACAAGGTGAAACAGAAAATCAG  
CGAAGTAGCCTTGTCTTGGGGTTCGTGGCTAACTCCATTAGAACCAGATAATATCTTTAGTAT

CCGCACTAGGCCCGGCATTAATATTCTCGCATCTGCTCAGGCCAAAGCTACCTTTCAGACA  
ATCTCTGCTACAGCTGCCTCTATCGCACAGAAAAGTCCACAATAGCACAAACAGTAGCTAC  
GAAAGCACAAACTGCAGCTCAGTGGGCAGCCAATGCAGCCCAAATGCCAATCCCATCGGA  
TTAATCATCACTGCTGTTGCCGATTGACAGCCGGGATTGTAAGTCTGGTAAAGAACTGGGA  
GAAGGTCACAGGCTTTTTTAAAGGTTTGGTTCGGTGGAGCAAAGACGATTCCAGCGCAGTAG  
ATGAACTCACTCAAAAATTGCTACCCTTACTCAGGAACAGGATAAAGCCAAAGCCAAACT  
TTCGGAGATGGAAAAGGCTCTTAAGGACGCTAAATCTACCAGCTTCGGTTATTCAGACGCAT  
TGGATGAGGCCAATGCCAATCTTAAGTCACATAAGAACGCCCTGGCAGACGCTGAAGAAGA  
ACTACAGCGCGTGCAGGCTGAATATGATGACGCTAAAGAGGTTGTAGCGGACTTTGAACAG  
CAGATATCCGATGCTAACCAGAACTGGATAAGTTGTCATCTCCTAATCTGGTAGGTATGCA  
GAAATACGAAGACCAGATATTCTCAGTTGAACAGCAGATTAATAAATTGGAATTAGCCCAG  
CTGCAGGAAGGCGAAAGCGAAGGGCGTAAACAACAAATAGAAGACCTCAGGAACCAACTA  
CAGGTATTGGAAGTGCAGCGTGATATTGAGTTTGACCCGCTGATACGCTCGGCCAAAGAGTC  
TGTAAGACTATACAGGGGCTAAATGATGAAATGGCTCCTGCGGATGTCATGGCCCGTATAT  
CAGAACTCGGACAGGAAATCAGCCCCGATGGAGTGCTTGGTAAAGGTCTGTCAGAAGCCCA  
GGCAATTCTTGAAGATAAGAACAATGCCCTTATGGCACAAACCGGTATTGTTTTCCGGCTTGA  
AAGATGAAATAGCCGGATATGAAGCTGAAATTGAAAATATCAATGATGCTATAGAAACGAT  
ATCCAGCCAATGGGATAGGGCAATCGCGGCGCAGAAGGCTGCTGTGGAATCACTGGGCAAT  
ACCATTGACGATACTAAGGCAAACTGGATTACCTGCAGACAGGCAATGGTCTGGGGATG  
AGATTAATATGCCTGGCACCATTATCAGCGGTGACCAGCGCAGGACTGACCTCAACAAGGA  
TAATTATACCGAGCATAAATCCTTTGATAAAGGTTATTACTACGTACCCAGATTTCGCTAATG  
GTGGTGATATCCCAGAACCTACCCTGCTGTATGGACTCAAGTCAATGCGCCCGTATGCCCTA  
GCTGGTGAGGCTGGTCCGGAAAAGGTTATCCCTGCGGGTAAAACGGCAGACAAAAGTGTTA  
TCAATAATTATGTCAATATCAATAATCCGATTGTTCCGGCAGGAAACCGATATTAAGCGGATT  
ACTCAACAGGTATCTGAAGAGATGCAGCGTTTGTACCAGCGTAACCTCAGACAGGCAGGTG  
CTTAATGACTGATAGCTTAATCTTCAATAGCTTAGACCTGAGCATATATGGGTAAATTATCAA  
TCGGTCTGGAAACAATCATACTTCATTTAATCGTAAACTATCCAGCTGGATACCCGCGCTTT  
TGCCTCAAGAGGTAAGCGCGAGGCATTGCAGATTAATACTGATTTTACGATTATTGGTAACA  
GTCTGTCGGATTCCCAGGAAAAGTGGCCAAACATCAAAAAGGGTTTTAATCACCTTAGAAACT  
GGCCAGTTAATCTTTGACAATATGCCCGATGTCTACTATAACGCCTCACTATCCCAATTGGAT  
TGTCAAAGACTGGGGCATAAAGATTTAGTCGGTACGATGTCTTCCCTCTGTGCTGACCCTTA  
CGGCTACTCCACTACTGAGACCGACCAGACTGACAATATAACTACTGACCCCAAAGCAGTCA  
CCATAACTGTCGGAGGCTCGGCATTAACCCTGCCAGTATTTACCCTGACAGCTGGAGAATCC  
CTATCCGGGCGGATATCCGTTAAAACAATGATACCGGTGAAGAGTTGGTCTGGGATAGCA  
GCATGGTAAGCACGGACGAGTTAGTCATAGATACCGAGCACTGGGTAGTTAAAAGAAGCG  
CACAGCATCTATGACGGACGTATCCGGTCAATTCCCCCGGCTGTTACCCGGACAGGACAATC  
ACATTGTGGTAACCGGATTCGGTACTACCGGGACTTTACAAACTGTATTCCACAGCAGATTT  
ATTTAAAGGAGTTTTATATGGCTAACGCACTATACGCAAAAAGCAAAAAGAGGCTTTTTTATCC  
GGGCTTATTGACCTTACCACAGACACTATCAAGGCAACACTTCTGGACAGCGCTGATTATAC  
CCCAGACCTTGCCGCCCATGATTTCTAGATGACGTACCTTCAGGTGCGAGAGTGGCCACTG  
TTACACTTACCGGTAATCAGTAACCGGGGGCGTATTTGATGCCGCTGATGCCACTTTCAGT  
TCGGTTACGGGTGACCAGTGCAGATATCATTATCTGGCAAGACACTGGGACAGAAAAGCA  
CCTCGCGTCTAATTGCCATTATAGATACTGCTACCGGTTTGCCATTACTCCCAATGGAGCAG  
ATATAAATATAGTCTGGGATAACGGGTCAAACAAGATATTCAAACCTTAGGGGTGACTAATG  
TACGCCAGAATTGACAGCACCCAAGTTAATAAAAAGGGACAGGAATTTGTCCGGGTAGATT  
TTACCTTGAGAAGGGTGAGCCTCTTTATGACGGATATCGTGTCCGTATGCCGGCCCGTGAA  
TTAACCGAGAAGGAATTAACCAGCCTTACTGGTAAAGGCGGCAATATCTCAAAGGCTGACT

ATGAGGCTTATGTGGATAAACATATCGGCTGGGAGATGAAGGATACCCCGTTTAATTGCCAT  
ATGTTTCGCAAAGCCTGCCACCCTTGAAGACCTTGACGATGCGGTACAGGCGCGTATCAAAC  
CCTTAAAGCTAATTGTGCCGAGAATGCGAAGACCAGTGCAGAATTTAAGCCAGTCCGAATA  
CTCTGTCCGCTTACTGTATGTGCTGCCAAGTACTCCAAAGGCTCAAAGGAGATAATGCCCGG  
TACAGAACTGGCGGAGGCTTGATATGGGTGAAATAGATATTGGGCCAGGTGCGACAAATAG  
AGGCACAAACCGTTCCGCATTAGTGACGTTTGTGATTTAAATAATCCTGCTAATGATACAG  
GTGTCATAAATTCGGTTGAGGTTTGGGGATATAATAATATTACAGGTTTAAAGATTGGGACA  
TTTTCTGGGTTCGGGGACAAGTTATAACGATAGGGATTACGCTACGATTGGTTCTGTTACAGG  
TGGTTCAAAGCAGACGTTTACTGGATTATCTATAGACGTTGTTACTAGTGATTTTCTAGGTTG  
TTATTTTAGTGATGGTGCTATAGAAAGAGATTCTTCTGGTTACTTAGGCGTTTATACATACTC  
GGGAGATGCATTTGGGTCAAGTTCTCATACGTATAACAATATTAGATGGTGATGCCATCTCTA  
TTTATGGCACTGGTGCGACTTCTACCGCTACCATATCACCTCAGGCATAGCTTCCACTCTTG  
CTTTTGGTACTGCCAAATTAATCAAATATTCTGCCGAGCGGAATAGCCTCTACTCTCGCCT  
TCGGAACGGCTAAATTAATCAGAATATACTGCCAAGCGGTATTGCCAGCATATCAGGGGTT  
GGCTACCAACGATTACTGCCATTATCCACGGGGTCATTACGCCGAGTGGTATAGCCCCAC  
TACGGCATTGCGCAGCCTATTATCTCTGTTGCCGGACTGCATATACCGCCCCAGAGCAGAT  
ATTTAGTAGAGCTGCATACCCCTATCAGTCAGGGTTGGCGAATACCTTCAAGCCACAATGAC  
CCCTCCAGCGCATGGGAAGGCGAAACCAAGGCATATGATGGCAGCCTCGTTTCTGGACAGG  
CGTATACTAACCACCAACGCAAACTGGAAGTATACCTGACAGCCCCCTCTATACCAGC  
AAATTACGTATTTATGGCGGTGCGACTAATAACGGCACCCCTATAACCCAAATATTGTGCT  
GGATGTGTATTACAGCAGTGCTTGGCACAATGTATATACGGGTGGGATACAGTATGATGCTT  
GGGTGGAGAAATCTTTAGCGTCTCCTCAAACCTATAGAAAAGCCAGAGTTTCTGTACCGAC  
ACTTTATCAGCTTCATATCCGATTAAGAACTTTTATGTCACAGAATTCTGGTTCTATGCAGCC  
CCAAGCGGCGGCGAATTGCTCTCAATATTGGAAAATGCTCACTCCATAGCCATAGAACAATC  
CCTGAACAAATCCCCGGTAATTTCCCTTCCCTGCCAGCTGGCGATGATAAATCTGTACTGTT  
GACCAGAGCTAACGAGGTCTGGATACGGGATATTGTTACTGGGGATGTCATTGCATCAGGCA  
TACTTGATGAACGAGTGGATACGAGATGATAACGGACGTTGAATATACAGGATATCTGGCC  
CAACTGGCCAACGAGTGGATTAGCAGTTACTCAGGCTCTTTTGTCTCAACTGCTACCCTCATT  
GATGAATATTATCATAACCAGACTTCACCTTACCCTATAATTCGGGGAGATGTCAGCGAACA  
GAGCGGTGCGATAAGCATATCATTTACCAATTGCTCTATTCTGGCTGCTCTGGAACAGTTGC  
AAACCGTATACGCCCCAGGGCATATGGAAGTTGATAATAACCGCCAGCTGAACTGGTATCGT  
TTTGGCGCACATGGTTATGCCGGCCAGCAAATCCGCTACCGCAAAAACCTTATCGGAATATC  
CCGCAGCATAGATTATCGCCAGTTAGCCAACAAGATATACGCCTATGGTGCCGGCACATGGG  
GTAGCCGAGTGCAATTTATCCTCTGCTCCCGGATATGCCCTTGATTATGTATATGACTACCT  
CTCAGGCCACATGGGGAGTTATTACTAAGACCATCTGGGACAATAACCAAACCAGCGCCCA  
ATTGCTTAAAGGGTGGGCAGACTCGGAACTGGCCAAGCGGAAAGACCCTATATATACCTAT  
AAAATTAATATGGTTGACCTCTCAAAGAGGCAGGATTTGAGTTTAAATAGCCTCAATCTACT  
TGAGCCGTACCAGGTGATTGATGAAGAGCTTGGCATAATCGGTTGAAACCCGTATTACCCGCA  
TCAATCGGCGAGACTTATCCAATCCTTATGACATTGACGTGGAGCTATCCAACAATGTGGTC  
AATATCAGCGACACCATCGCAGAAGCTCGCCCGGCGCAAATAA

>CG1

TTGGAAGTAGCAGACATTACAATCCCTTATGGCAGGTCTGACGTATTCAAACCTGTATCCGCT  
CGGAGATACCCATCTTGGTACTCTCCACTGCAATGAGGACTTACTTAAAGCCAAGATTAGAG  
AGATAGCCCAAACAATATGCCCGCTGGGTTGGTCTTGGAGATTACGGCGAATTTATCTCA  
CCCGGAGACAAACGCTGGGATGGCAAATGTATAGCGGCGTGGGTTGACAGGGATGATATTG  
CCGAGTGCGAAATAGATTACATCGCAAGGTTATTCCGGCCCATCGCTTCCAGTGTATCGGG

CTTATTGAGGGCAACCACGAGGACATGTTTCGCATCCATTCTCATGCTGACCCGCAGAAGAA  
CATCTGCAAGAGGCTTGAGGTGGCAAATCTGGGTGCTACGGCATTGTAAACATGCGCTTCC  
GCAGGAGCAATAACGATGCCCGCTTAATTCGGATTGTGGCGGCTCATGGTGTGGGGGTGCA  
ATAACGCCCCGGTGCCAACTTACCCGGTTACAGCGTTTTATGAACTCGCATGCGGCCCGTGT  
ATATATGCACGGCCATGTACACGATATTATCACCCACACAATCCCCTATCTGGATGTATCAG  
ATGCCAGTCGGATAGTAAGCAGGGATAAGCTGGGAGCAATGACAGGGTGTCTTTTACCCT  
TACACTCAAGGAGTAGCTCCCAGCTATGGTGAGAAAAAGAATTACCCGCCAACTTCTCTCGG  
TTGCCCTGTATTACTATTGTACCCGATAAAGGACATTGTGAAGGTGGAAGGGTAAATGGACA  
TAATAGGCTGGCTTGGCGTCTGTATAGGCGTTGTAGTGCCACTCCCCAGCTTATACGCATAT  
TCAAGACGGGTAAGGTCGCCAATATCTCAGTTTTAACCTATGCCTTACTGGTCGTCACTATCA  
CTTGTTATCTGCTCCATGCCATAAAAATAGGCGATGCCGTCTTTACAGTCAGCAACGCCTTTA  
ATCTTTTAACTAACAGCCTGGTACTGATTATGCTCGTAAGAGGCCACTATGACAGAGGCAGA  
TAGAACTGAACTTATACTGGACAGCCAGATAAACTGCGTGACCGGTTCTGCACTGAGGCCA  
TGCTGGAAGTCAAGACCGCTATCCCAGGAGGCTCTTTGTAACCGCCAGTGGTATGTAACC  
TATATCAGGCTGTGGAGCGAGTATGCAAGGACTAACTAACAACACTAGCTAATATTATTGCC  
AAATAAATAGCAATAGGAATTAGCATCGTTACTTTAAACCATGTTGTAATTCTAGGCTTTTTA  
ATATCGTTTTGATTTTTCTATATCTTGAATACCGAGTTGATTTCTGTACTTTTTGCATATTACCT  
TAGATTCGTCTAATAACTTAGTCTCTCTCAATTACGAGGAAAGCAATGACACTAAAAACG  
ATTCCAATAATAGAAAGTACTATAGAGATAATATCCCCCAGCAATCATCTAAATCTATAGT  
TAATGACCATAAAGCACCGCCAGCAATAATGTACAGTAGCCACGTGTAATGAGCTTCTTCTT  
TCCATAGCGCATCATGCACATGCCTTAATCGGTTATTGGCATTATATACAGATTTACAACAT  
CTGTGTTTTGCAGAGGTTACGTTTTATAATTCACGTATAACTCCTAAGTAAAAGATTATGGCA  
GTGGAAGTAACTACCTACTGCCTCAGCCAGCTTTTCAGTAACAAACTGGTTCAGGCTCATCTT  
ATCCATAGACGCCTTTTGAGATAGTTTGCAGTTCAGGTTCCGGGCCAACCCGGACATTGAACT  
TACCGCTGAACTTCTGCTGTGGTTCAGGAATTTTATACCCACGTTCCAGTTGGTCTTCAAGCC  
ACATTCGCTTGTGGATAGCCAACTCTCAAGGGCTTCTTCTGGAGTATCTCCATCACCTATGC  
ACCCTGATAACTCTAAGGCTCTGGCTACATAGTAAGTACCGCCGTCATTATCTTCATCCGGCT  
CAATGACAACGTATAGGGTAACTCCATGTAGTAGTCCAAGTCTTTGATGCTGTTTTCATAT  
TAACCTCAGACAGCCTGCTATTTACAGGCTGTCTATTTTATTGATTAAATCCTTTACATAGCA  
AGTGCGAATTGGGTTTGTCTCGGATAAAGGCAGGGAGTATTGCCCAATCTGTGCTTTTGCCT  
GAGACCCACCCATTTTGATTGTTCCGTATTTATTGACCAGCCATTCAAAATCTTCAAGTGAAA  
CATTCTTGGGGTTCTGGCGTATCTTCTGTTCTTTTTATCGCTGGCGGTCATTTCACTAACTCC  
TTACATTCATATAGTACCATATACAGTACCATATGTCAATACCTTATTTACTAATTATCAAAA  
TATTTTTAGCGGGCAAGTTATGAAACAGTCAGTATTTTATGCCTCACTCCCCCTATTCAATC  
AGCTATTAATAATCGGGCAGGACGGGGCAAGAATCCAGTTAGATATTCCTGAAACTGAACTG  
GATAAACTCGCTCAAATAATCCAGTGGCGGGATAAAGTCTTAAGAATAACCATTGAACCGG  
TTGAAGGTTACATTTATGGTGCAAAAAGCGAATAAAAAGACAGTTGGCAAGACAGCAAAAA  
AGGTTGGCCGTCCCCGGATAAACATAGACTGGGAGACGGCTAAAGGATTATGTGAAATACA  
CTGTACCCAAGAGGAAATAGCCAGCGTACTCAGGGTGTCTGTTGATACTTTGGACAGAGCAG  
CTATACGCAAATTTAACCCTCCCTGGCTGAGTTTATGCTTATCCATTCTGAAGCGGGCAAG  
GCTAGCTTACGCCGTGCGCAGTGGAATCGTGTATGGGTGTACCCCTCAATTGGCCACAGA  
TAAAACGGCAATGTAATTCTTGACCGCAAGGGTCAGCCAACCATTATCCCGGTATTGCTC  
CAAGCCCTGCGATGCAAATCTGGCTGGGCAAGCAATATCTCGGACAGGTTGATAAGCAGGA  
GATTACAGGGAAAGACGGGCAGGAACTTATGAACCAGCCATTATTCAAGTTATTTCTGTGT  
CTGCCCAACAGGCTACTCAGCGAATTACGGCAGGCGAAGGGACAGAACCTTGTGCAGATTA  
AACTACCCGGATTTATGAACAGAATGCCAATGCATGGCTGAAACGCAAGGAAGGTATCCG  
GCGTGCTTTAAATGAGGGTGGTACGTCCTCAAGCAAGACCTTCTCTGTATTGCAAATATCT

ATCTCATTCTCTCCCACTCAAAAACGCCATTACTGGCAACAATCGTTAGCGAATCATTACCGC  
ATCTGAAACGGGGTTGCATACGGGATTTCTTTACAATCCTTGATGAGTCTCCCGACAACAAT  
CCCAAATACAATAAGACAGACCACATTTACACCTTTGTCAATGGCTCCAAGCTGGAATTCAT  
GGGCTTGGATGAGATAGGCAAAGAACGTGGGCCGAGACGGGATATCCTCTACTGCAATGAG  
CTTAATAACCTCAAGTGGGAAGTGGTGAAGGGCTTGATGTCCGCACCAATCTGTTACATT  
TGCAGACTGGAACCCGACCTCTGAATTCTGGGTGCATGAAAAGTGGATAAACCGGTCTGAA  
AACATCTATATCCACTCAACCTATCTTGACGCTTTGAATGTATTGCCGCCGGAAGTGGTGGC  
CAATATAGAAAGCAATAAAGACACAGACCCCAACTGGTGGAAATGTGTACGGGTTGGGCCGT  
ATAGGCAAGATTGAAGGTCTGGTATATCCGATGTTTGACCAGGTCAATGAATTACCCCAAGG  
TGATATGTTCTACGGCTTGGACTTTGGTTATTCAAATGACCCTACAGCCCTTGTCCGGTGCCT  
TATTCAGGGTAAAGACCTTTACTGCCAAGAGCTTATTTACCAGTCAGGTCTTACCAATGATG  
CTATTGCCTATCGCATGAGCGAGCTTGGTATCCGTAAGGGTTATGACGAGATATTCGCAGAC  
GCGGCAGAACCCAAATCTATAGAGGAAATACATCGGCATGGGTTCAATATCAAGTCATGCC  
CTAAAGGGGCTGACAGCGTGAATACGGCTTACAAAGAGTACGCCAACATCACATCCACTG  
GACAAAGGACAGCTTAAACAGCATCAAAGAAATACGAAACTATCGGTATATAGCCGATAAA  
AACGGAGCCTTAACTTCCAAAACCACTCATCAGTACAGCCACATGATGGACGCAATGAGGT  
ATGGAGTTATAGGCAAGATAAACAGAATTCCCATTATAGTGGCTTAGGGGGAGCGTGAATG  
TTAGACACTCTAAGAGGCAATATCGCTAGTTTTATATATCCGAAGCATCAGAAGGCCAAGAC  
TGCCGATGTGGTTGGTTTCCAATTTACCTCTGACCAGCCCATCTATACCAATATGTCAGTTGA  
AAAGGGTACACGCGAAGGTTATGCCTGTTCGTTTACGTCTACCGGAGTGTGAGGACTATCA  
TTCAGGCCGCATCTGCTATCCCTTGGATGGTTGTAGATAAGGACGGGAGAACGCATACCCGGC  
CATGAATTTGAAAAGCTAATGGCCAAGCCTAACCCGTATTTTTCCGGTCAGGATTTAATAGA  
ATTCACGATAGCCATTTATGCCTGGTGGGTAATGCCCTTTGGCAGCCTATCTTTGTAAATGG  
GAAACCGCGAGAATTCTGGGTAACAATGCCGGATAGAGTTAAGCCGGTACCCGGTGGTGAC  
TGGATATCACGTTGGGAAGTCAAAGGCGAAGGTGGGAAGACAGAGAACAGGCCACCTGAA  
ACCTTTGTCCACTTCATGCAGGTAAACCCCGGTAATCCCTACTGGGGTATCGGGCCGTTACA  
GGCTGCCGCTAGAACGATAGACACCGATAACGAAGCACAGGACACCCAGAAGGTCACCATG  
CAAACCGAGCAATGCCTTCGGGTATTTTATCACCTGACACAGACATACCCCTGACCAGTT  
TGAACAGACTCAGAAGCAATTCAAAGAGCTTTATAAAACTAAGACTGCCCGGCGTGAACCC  
TGGCTGTAAATGCCGGTATGAAGTGGCAACAGATGAGTTTATCAGCTGTTGAAATGGACTT  
CATCGCTTCCCGGTTACAGAATAAACGGGATATAGCCGCCGCTTTCGGCATCTCCCCCATAT  
TCTTGGGAGACCTTGACCAGTCCAGTTATAACAACATGGTTGAGGCCCGTAAGGCTTTATAC  
CAGGATGTAGTTATCCCTATGCTTGATGATATTCAAGCCACCCTCAATATGCGGATAGCTCCT  
TTGTACGGAGATAACCTGTCAATAGCCTATGACCTTTCAGGTGTGGCGGCTCTGCGAGGAGA  
CTTACCCGCCAAGGTAACACAAGCCCAAACTCTTTTTAACATGGGCGTTCCCTTTGAACAGA  
TAAACAGCCGTCTTGAGCTTGGATTTGAGAAGTTCACAGGCTGGGATAGAAGTTATAAGCCG  
TTTAATCTGATGGCAGATGGAAAGTCCATGCAGTTACCTGCCGGCAATAAATCAGAAGGCAT  
ATCTGAGGAACAGAAGACTGCCGCGTGGAAACGGATTGACTCCCGGCGTGTGGATGGTGG  
AGTGTGTTGGCGACAAGGTTGAGGAGTTATACAAAGAAAATGGCGACCTGTTGGCAAAGA  
CCAAAGGTAAAACCCCTGCTGAATACATAAACGCCACTAAAACGCCTTGAATCAACTAC  
CCCGGAATGGGAAAAGAACTCTCTGCTATGTATATGTCCTTGATAGAGGATTTTGGGGGAG  
AGATAGCCGGTGATTTGGGTATGAGGAAAAAGGCTGATGAGCCTTTTGACCCCTTACTGAA  
GCGGCTATGGCTTGGATAAAAAAGAATGCCGCCAAGACAGTAACTACTATCATGGAAACTG  
AACTTGAAGCGATAGCCGGGATAATTGAGGCAGGCTTTGCTGAGGGTTTATCTATCCCAAT  
ATCAGCAAGCAGATAAGACAGTACTATGATGACAACCTCCGCATGGAAAGCCGCAAGAGTTG  
CCCGAACAGAAGTAGCAAAGGCTGCCGGATACGGGCAACAGGAAGCCGGCCAGACAATCCG  
GGGTGGTACAACTCACACGTGGTTAGCCGCCAGAGATGACCGCACCAGAGATTGCACTC

TTATATGGATGGCGAAACAGTACCTCTTGGGAAGCCTTATTCCAATGGGTTGAAGTATCCGG  
GTGACCCCAGCGGTAATGCAGACGAAGTAATCAACTGCCGATGCACAGAGTTGTTCCGGAGT  
AGATTAACCACTCATAAAGTTATCAAATAAGCCCCCTTAGCCGGGGGCTTTTTTTATTGGAGG  
CAATTATGGCCGATATCACAGAGGAAACACCCGTAGAGATTATTAATTGCCCTTACTGCAAT  
AACCCGAAACTCAGCCGGTCTGAACGAGTTGACGAAGGCTGGCTGTGTCTGGATTGTGGGC  
GAACATTTAATTATTTAGAGGTGATGGGTATGACACGAGTACTGGAACGCAAGGAATTTAA  
ACTTGAACCTTAAGGCGTTTGACGAAGAGGCAGGCACATTTGAGGGTTATGCCTCTACCTTTG  
GCGGTATGCCTGATTCCTACGGCGATGTAGTGGATAAAGGGGCTTTTGCTAAGACTGTTAAA  
GAAGGCATGAAGCGTATCAAGCTGCTTTTTTAACCACAACGCCAATGAGCCAATCGGCAAGA  
TATTAGAACCTTTATGAAGATGATTACGGTCTATATTTCAAAGCCAAGCTCTCTCTGGGTGTAC  
AGCGTGCAAGGGAAGTACTGGCCCTTATGAAAGACGGCGTTATTAATACCATGTCCATAGG  
ATACGACACTATAACCGAAGCTCTGGAAGGCAAAATAAGACATCTCAAAGAGGTAAGACTG  
TGGGATATCTCCCCGGTTACTTTCGCGGCCAATCCTGAGGCTGTAATTACCGGGGTTAAATC  
AGGGCGGGTATTATCCGCTTCCAACCTTATCCAAAGTTAAAGAGGCCATTGCCGCTTTACAGG  
CACTTGTGGAATCTGCTGAGCAGGACGAGGAGCCGGCTAAGTCCACTCCCCCACTGTCAGA  
GACCCAGAAGCCGCTGAATTAGAGAAAGCGATTAACGACCTTAAAGCCACTTGCAATGGTT  
TTGACTTTAAAAAAGCTGAAGCCAGTATCGCAAGCAATTTCAAGAAAATAGAAGGAGAAAA  
CAAATAAATGGACAACAAAGAATTAGCCGAACAGATACAGGGTGCAGTTGCTGACCTCAGG  
AATCATGCTGCCCTGATGGACGAGGAAGCCAAGAAATACGGCGCTGCCTCTGCCACGGCTC  
AGGCCACTATGGAAAACTGAATACCCGCATTGACGGGCTGGAGTTGAAACTTCAGAAAAA  
CGCTATCGTACCGCCCGGTGAGGCTGAAAATGCCGAAAAGAAAGCGCATTCCGCTGCCTTTT  
TCAAGTGGATGCGGCAGGGCAAATCAGGGCTGGAACCCGCTGAACGCAAAGCCCTTGTTCA  
GGACACTACCGGTCTTTATCTGGTGCCTGAGGAGATAGAGAAGGAAATCATAAGGGCTATTC  
CCCAGCTGAACATTTTCCGCACCTTGGTTCCCTTCTCGCCCTATTACCACTGACAAAATCCGCA  
AGCGGACTCTGACCGAGGTATCTATGGGTTGGGGCAAGATAGAAACTGGTGCAAGCATCAC  
CGAGTCCACCCCACTCCTGCCACTTCTACATTTACGCCGAAGACCTTTACGGCCTGACCA  
AAATCGGCGAGGATGAACTGGCTGATGTGGATGCCAACCTGTCTGCCATTATCGCTGACAGT  
TTCAGCATTGCGAGAGCTAACGCTGAGGAAGCTGCCTTCGCAATCGGTACCGGTCATACTTA  
TGCCCAGCCTTGCGGTATTGCCGTAGACTCTACCCTGCTGACCAGTATCGGTAGCGGCGCTG  
GAGCGGGTACTGTCGGCACTTATGGCCGCACTTGGACTACTGATGACACTGTCACTGTTGAA  
GACCTCCTGAAGTGCGAATATGCTCTACCAGCTCAGTACAAGAAAGGCGCTGTCTGGCTGAT  
GAACAGCAAGACTGAACTGGCTCTGCGCCTGCTTCGTGCAGGTGGCAGCACTACTACTGACG  
GCCCGTTCCTGTGGCAGCCTTCACTGATTGCCGGTCAGCCCAACACCTTTGACGGCTTCCCTG  
TACACAACAACGACAGTATGAAATACCCTGCTGATACTACTGCCGGTATCAACGTTATATTC  
GGCAATTTCCAGCAGGGTTATCGCATCGTTGACCGCCAGGGCATGTTTATCCAGAGGCTGGA  
CGAACTTTATTCCGAATCTGGTCTCGTGGGCTTCAAGGCTCACTTCCGTGTAGGTGGCGATAT  
AATCCGCCACGCTGCCTTCCAGGTTATTGCCAACGATGTCTAA

>CG3

ATGACCAGAGAGATTAATTCAGAGGCAAACGGGTTGATACAGGGGAATGGGTATTCCGGAT  
ACTTTGCTTATATAAGCGATGGCACTACAGAACATAAGAAAATACCAGTAATTTTCACTGGC  
GATACTGGGTATAACTTGTATGAAGAGTTAGTGATTAACGCTTTGAAGTTATCCCTGAAAC  
AGTAGGGCAGTATACAGGATTAAGAGATAAGAACGGCAAGGAAATATACGAAGGCGATATT  
GCCACTATAGCTTGGCATCCTGAAGAACCGCTTAAAGAAGATAAAGAATTTATGGGTAGTGCG  
ATACAGCGGATGGAAATTCAATGCAGAGCCGAACAGGGAAACACTAAAGCCTCTGGGTTCA  
ACATATGCAGAGGTATTAGAGGTTATAGGCAACATCTATGACAATCCAGAACTATTAAGG  
AGATTAATAAGATGATAAGAACAGTATTCAATAACGGTAAATATATTAATAACGAACATC

ATGGGGTAGATACTATAGTAAGAAAGGATTTAAAAGGCCAAACATAGGGAAAGTTGTTTGTG  
CTATGAGTGTTTCATTATTAATGTCTCCTTGCCCGATAGCTAAAGACTTATTCGCATTAGATAA  
AAAATATCACATTGTAACGCCAGTTTTTTGAATGCCCTGATTTTAAAGAGGAAAAAGAGGTTT  
GACTATGTACGAACCGAGTAAAGAAGTATAGAGCAGATAGCCAAAGAATTCCAAAACAGG  
AAGCCCTTAGATTATCCATTAAGTATGATGCAGAGGCATATATTAAGTATGATATATGTGTCCA  
GTTACCCACTATCCTTAAGGCTCTTGAGCACATGGAGAACCGACCTCAGTGGCAGGATAAGC  
CAGATAAAGAGGGCTGGTGGTGGGTTAAATCTTCAAACAAGGAATTAGGTATTTGGGTTGTT  
GAAATACTTAAAAAGGATGGCACTCTACTTATACCAAAGTACATATCCATGATTGGTGGAAAC  
AAAAAGTTATCTCTACATACCAGAACCAGAACCCTTATAAGGGAGAGGAATAGATTTTGCAG  
AACATATAAAAAAGTCTGATTTTTATCTTGGGAGAATGGCATAACCGGTATTATAATATAAAGC  
AGGTAGATTTGAAGGAGCTGACAGAGAAGGAAGTACCAAAGATAATAACCAAAAATCCAAGC  
CGTGAAAGAATCCGGCTTCGGAGAGGTTAAAGTCTGCATCAGAAACGGCTCTATCTACCGCA  
TTATCAAACCGAAGAGGAAATGATGGAAACCTCTAAGAACTAAAACTGAATAATTAGGT  
CCTTACAGAAGAAGTCTGAGCAGGACATTCCCGAAAGGGCGTGTCTGCTTTTTTATTTGCGCG  
AGAAAGAGAGGCTATATGGCAACCGAGTGGCTAACAGAAAAATGCCCCAGGGCTAACTGCA  
ATGGCACGCTGTATTTGGATGACACGTTAAGAAGCCATGAGCGGAGATACAAATGTTCACTT  
TGCAGCCGTGAATGGGGAGAGGCAGAAGTCAAGCGGGAAGTGGAAATCCCTTAAAGACAAAC  
TGAGAGGCCGCCAGATATGAGAGAGAGATATTTACGTTGCACTATCTGGGAGTGCCTGCCG  
GAGATAATCCAGTTGAAACTGAGGGCATTAGCGTCTGCCGGCTGGTGTCCGCCTGGGGAAC  
ATTCAGCCTTTGCAGGGCTGGAAAGCACCGAGGAGATTGACCGCTGATGAGACAAACCCC  
CAGCCATGTTAAGCGGGGTAAAGCATGGTAAGAGAGGGCGTATTTTCAGACCTGCTCAAATAC  
GTTTCAAAGTGGAAAGACGTCATGTGGGTAATCGCTACAGTTTTACCTCAGGAAGAGGGGATAC  
TGGCCGCCTGAACCCTGTATTGAAATAAGCGCCGGCGGTCAAAGGTCTATATCCCATGTCGC  
ACCATTTGAGGCAGCCTGCCAAGTCCGGGCAGAGGTATCTGAACGGCTCAGGATGACAAAG  
GAAGATGGTGAACCCCTATTGTGGGAGTTACAGAAGGGCGGAGTAGACTACTACCCTGTGC  
TGTGTCTGCGGCCCGTAAAGCCCTGTTATATATCAGCTCAGGCTGGAAAAGAAGAAGGCA  
GACATACGCCGAGTGGAAAGCCCATAGAAAAGCTACTAACAAGGTCTTCGCAGTAAAAGGA  
TAAATTTGTCTTTTTTATGTGAAAATCTGTTGACACAAACGTATGCAGTTTATATACTTAAG  
AAAAGTAAAAGTATACAAAGTTTCCAGCAAGCCGGTGTAAACAGCCGGCTTTTTTCTATTGGGT  
GAGAGATACGGCGGCATACTGGCGCAACGTGGGAAATAAATTCTCTTAATGGCAGCAAAAC  
CCTTAGGCTACCAGCCCAATAGACTTATCCCCCAAAGGAGCGTGTCTCCGATGGGAATATA  
TGGGGCAACCTGCCGAGATAAGACCGCAACTTGTCTTGGTTATATAGAAGCCCAGGGCGGT  
ATTGCAGGATGAAACCGCCACATTATCATCCCAGTTGTAAAGGGAAATTATACAACTGGC  
CACTCCGGTGTATGCGTTGCCGGAGACTATAACGCAGGGTAGAGCAGCGGTTAGCTCGTCTGG  
CTCATAACCAGAAGGAGCTGGGACAGAACCGGCACCCGTTACCAAATTCACGCTTTTGACT  
GAGGAGAATTATGCATTATCGTAAAATCCGTATTTCAAGGGCAGAGACCAAGGATGAACAC  
AGAGTAATCATGGAACGTTATTAGGTAGGCTCTAAGAAGCGACGAGGTTGTTTCATCACAT  
CAACGGTGATAAACAAGATAACCGTCTGATAATTTACAATTGATGACATATAAACAGCATA  
ATAGCCTGCATTTTTACCCGATGAGCCGCGTATTTGTTTCGATTCCCGGGTGTGGAGGAATA  
CATGATGCTCAGGGATATTGTAAAAACATTGGTTCCGATGGCGAAGGACTGGTAGTCCTTA  
TGGATTAAGGGGCATAGTAGCAGAAATACTGCGTGTATTCCTTAGCCGCCCCCTGCAACCA  
GCCTTTACCATAGCCCGCCTAACCAGCGGGCTTTATTATTTCCCTTACAAAATCTTACGTAA  
TCTTACGTTTTTTGACAAAACCTAAAGGAGAAGGTTTTGAAATTACCAGAGGGCGAAACCAAG  
GCATCTTTGTTAGCCAGATATGACCTTGCCAGAGGTGATAAGGATAAAATTATGGAGCTAAT  
GGCTCTGTGGGCGCAGTTCAAGAACTCACTCAGAGACTTTATGTCCACCTTACGCTGTG  
AGCCAGACCCTCAACCTTTCAGCATGGGTATAGCTCCAACCTTAAAAGACCATCTGGAAGCC  
TTCAAAGCCTCAGACAAAATCGTATCATACCATCAGCAAGTACCCTTTGAGTGGGTATTTGA

GATTAACAAATAAACCAGTTGCAATAGTACATACCGCAGATTGGCAATTGGGAGAGTCC  
GGGGTAGACTATGAGCAATTTGAAGCAGACCATAATACGTGGCTAATTACGCCCAATCTCCT  
CGTTAATGTTGGCGGAGATGGGTATCAGAATATCATTACAGACTTCCAAGATGGGGTCTTCGC  
ATAACCAACAGCCGATAGTAAGCCAGCGGGTATTTACTACACGGCAATTAACCTTTGAGC  
GACGCGAAAAAGCTTCTTGCCATAGGTACAGGCAACCATAACTACTGGTCTGCCTTACTTTC  
GGGAGAAGATTGGGATATGGAGTTAGCCACCGGCTTGATGTTGCCTATTCCAGACATGCTT  
CGGTAATCCACGTCAAGGTTGGCAAATGGACTATCCGATACTCAGGATGCATAAGGGCCG  
GTTTAACTCCTCGTTTAAATTTAACCCATTACAGCTAACAGCATCAGAGAATGGATTTCCCGG  
ATGCCAGAATAGTGGTTGTTGAACATCATCACTGCCAGCGGTTGAGCAATATTACTATAAC  
AATAAATGGTGTGTGCTATCCGGCCCGGAACTTACGCTGTCAATGATGATTTTGCTCAACA  
GAATGGTTTTTTTCGGTGCAAGGGTAGCAAATCCAACAGTGGTTTTATTTCTGACGAAGACA  
AGATAGTTGGCTTTTTGGATATGTACGCTGCCATTACTTAAAGGCGGTCAGTTAGGAT  
GACAGAAGAATTTGACCATGTGCAAGATAGCGGGGAACGGCAATCATTTACAGACCGGTGCA  
GTCCGAGACGCTCAAGACCACAAAGGCCGCTATGACCTGTTACCGCCATATGCCATAGAAC  
GCTTGGCAAACATTTTGAACCGGCGCAGTCAAATATGCTGCTCGCAACTGGGAAAAGGG  
TATACCCCTAATGCGCTATATAGATTCCGGTATGCGTCATATGTACAACTGATGGATGGGC  
AGACAGATGAAGACCATGCGGCAGCCGCCATGTGGAATATTGCCTGCTATATCCAACTGA  
GAAATGGATTAAGGACGGCATACTCCCTAAAGAGCTTGATGACCGCCCTGTACGGATACAA  
TGGACATAATAGGCTGGCTTGGCGTGTATAGGCGTTGTAGTGCCACTCCCCAGCTTATA  
CGCATATCAAGACGGGTAAGGTCGCAATATCTCAGTTTTAACCTACGCCTTACTGGTTCGT  
CACTATCACCTGTTATCTGCTCCATGCCATACAGATAGGCGATGCTGTTTTTACAGTGAGCAA  
TGCCTTTAATCTTTTAAACAAACAGCCTGGTGCTGATTATGCTCATAAGAGGCCGATATGACA  
GAGGCAGATAGAACTGAACTTATACTGGACAGCCAGATAAACTGCGTGACCGGTTCTGCA  
CTGAGGCCATGCTGGAAGTCAAGACCGCTATCCCGGCAGGCCTCTTTGTAACCGCCAGTGG  
TTTAAATACCTATATCAGGCTGTGGAGCGAGTACGCAAGGACTAACTAACTACTGCCTC  
AGCCAGCTTCTCAGTAACGAACTGGTTCAGGCTCATCTTATCCATAGACGCCTTTTGAGATA  
GTTTGCAGTGCAGTTCGGGGCCGACCCGGACATTGAACTTACCGCTGAACTTCTGCTGTGGT  
TCAGGAATTTTATACCCACGTTCCAGTTGGTCTTCAAGCCACATTTCGCTTGTGGATAGCCAAA  
CTCTCAAGAGCTTCTTCTGGAGTATCTCCATCACCTATGCACCCTGATAACTCTAAAGCTCTG  
GCTACATAGTAAGTACCGCCGTCATTATCTTCGTCAGGCTCAATGACAAGTGTATAAGGCAA  
TCCCATATAGTAGTCCAAGTCTTTGATGCTGTTTTCATATTAACCTCCAGACAGCCTGTTAT  
TTCAGGCTGTCTATTTTATTGATTAATCCTTTACATAGCAAGTGCGAATTGGGTTTGTCTC  
GGATAAGGCAGGGAGTATTGCCAATCTGTGCTTTTTCGCTGAGACCCACCCATTTTGATTGT  
TCCGTATTTATTGACCAGCCATTCAAAATCTTCAAGTGAAACATTCTTAGGGTTCTGGCGTAT  
CTTCTGCTCTTTTTATCGCTGGTGGTCATTTCAATTAACCTTACATTATATAGTACCATAT  
ACAGTACCATGTGTCAATACTTTAATCACTGATTATCAAAATATTTTTAGCGGGCAAGTTATG  
AAACAGTCAGTATTTTACGCCTCACTCCCCCTATTCAATCAGCAATCAAAATCGGGCAGGA  
CGGGGCAAGAATCCAGTTAGATATTCCTGAACTGAACTGGATAAACTGGCCCAAATAATC  
CAGTGGCGGGATAAAGTCTTAAGAATAACCATTGAACCGGTTGAAGGTTACATTTATGGTGC  
AAAAAGCGAATAAAAAGACATCTGACAAAACAGCAAAAAGGTTGGCCGTCCCCGAATAA  
ACATAGATTGGGAGATGGCTAAAAGATTATGTGAAATACACTGTACCCAAGAGGAAATAGC  
CAGCGTACTCAGGGTGTCTGTTGATACTCTGGACAGAGCAGCTATACGCAAATTCATCATT  
CTTTGTCTGAGTTTATGCAAAAAGAATTCAGAGATTGGCAAAGCCAGCTTACGCCGGATGCAA  
TGGGAAGCATGTATGGGTGTAGCCCTCAACTGGCAAAGGATAAGAACGGCAATGTAATTC  
TTGACCGCAAGGGCAAGCCAACAGTCATCCCCGGTATTCCTCCAAGCCCTACAATGCAAATC  
TGGCTTGGTAAACAATATCTCGGACAGGTTGATAAACATGAGATTACGGGGGAAGAACGGGC  
AGGAACTTATGAACCAGCCATTATTCAAGTTATTTCTGTGTCTGCCAACAGGCTACTCAG



CGAATTACGGCAGGCGAAGGGACAGAACCTTGTGCAGATTA AAAACTACCCGGATTTATGAA  
CAG AATGCCAATGCATGGCTGAAACGCAAGGAAGGTATCCGGCGTGCTTTAAATGAGGGTG  
GTACGTCCTCAAGCAAGACTTTCTCCGATTGCAAATCTATCTCATTCTCTCCACTCAA  
AACGCCATTACTGGCAACAATCGTTAGCGAATCATTACCGCATCTGAAACGGGGTTGCATA  
CGGGATTTCTTTACAATCCTTGATGAGTCTCCCGACAACAATCCCAAATAACAATAAGACAGA  
CCACATTTACACCTTTGTCAATGGCTCCAAGCTGGAATTCATGGGCTTGGATGAGATAGGCA  
AAGAACGTGGGCCGAGACGGGATATCCTCTACTGCAATGAGCTTAATAACCTCAAGTGGGA  
AGTGGTGCAAGGGCTTGATGTCCGAACCAATCTATTACATTTGCAGACTGGAACCCGACCT  
CTGAATTCTGGGTGCATGAAAAGTGGATAAACCGGCCCTGAAAACATCTATATCCACTCAACC  
TATCTTGACGCTTTGAATGTATTGCCGCCGGAAGTGGTGGCCAATATAGAAAGCAATAAAGA  
CACAGACCCCAACTGGTGG AATGTGTACGGGTTGGGCCGTATAGGCAAGATTGAAGGTCTG  
GTATATCCGATGTTTGACCAGGTCAATGAATTACCCCAAGGTGATATGTTCTACGGCTTGG A  
CTTTGGTTATTCAAATGACCCTACAGCCCTTGTCGGGTGCGTTATTCAGGGTAAAGACCTTTA  
CTGCCAAGAGCTTATTTACCAGTCAGGTCTTACCAATGATGCTATTGCCTATCGCATGAGCG  
AGCTTGGTATCCGTAAGGGTTATGACGAGATATTCGCAGACGCGGCAGAACCCAAATCCAT  
AGAGGAAATACATCGGCATGGGTTCAATATCAAGTCATGTCCTAAAGGGGGCTGACAGTGTG  
GAATACGGCTTACAAAGAGTACGCCAACATCGCATCCACTGGACAAAGGACAGCTTAAACA  
GCATCAAAGAAATACGAAACTATCGGTATATAGCCGATAAAAACGGAGCCTTAACTTCCAA  
AACC ACTCATCAGTACAGCCACATGATGGACGCAATGAGGTATGGAGTTATAGGCAAGATA  
AACAGAATTTCCATTATAGTGGCTTAGGGGGAGCGTGAATGTTAGACACTCTAAGAGGCAA  
TATCGCTAGTTTTATATATCCGAAGCATCAGAAGGCCAAGACTGCCGATGTGGTTGGTTTCC  
AATTTACCTCTGACCAGCCATCTATACCAATATGTCAGTTGAAAAGGGTACACGCGAAGGT  
TATGCCTGTTCCGTTTACGTCTACCGGAGTGTGAGGACTATCATT CAGGCCGCATCTGCTATC  
CCTTGGATGGTTGTAGATAAGGACGGAGAACGCATACCCGGCCATGAATTTGAAAAGCTAA  
TGGCCAAGCCTAACCCG TATTTTTCCGGGCAGGACTTGATAGAATTCACGATTGCCACTTA  
TGCTTAGTGGGCAATTCCTTTGGCAGCCTATCTTTGTAAATGGGAAACCGCGAGAATTCTG  
GGTAAACAATGCCGGATAAAGTTAAGCCTGTTCCGGGTGGT GATTGGATATCACGCTGGGAA  
GTCAAAGGAGAAGGTGGCAAACAGAAAATAGACCGCCTGAAACCTTTATCCACTTCATGC  
AGGTAAACCCCGCAATCCTTATTGGGGTATCGGGCCGCTACAGGCAGCTGCTAGA ACTGTA  
GACACCGATAACGAAGCCCAAGACACTCAGAAGGTCACCATGCAAAACAGGGCAATGCCTT  
CGGGTATTTTATCACCTGATACAGACATACCCCTGACCAGTTTGAACAGACACAAAAGCAA  
TTCAAGGAGCTTTATAAAACCAAGACTGCTCGGCGTGAACCTTGGCTCTTAAATGCGGGTAT  
GAAGTGGCAACAGATGAGCTTATCAGCTGTTGAAATGGACTTCATCGCTTCCCGATTACAGA  
ATAAACGTGATATAGCCGCCGCTTTCCGGTATCTCCCAATATTCTTGGGAGACCTTGAGCAG  
TCCAGTTATAACAACATGGCTGAGGCCCGTAAGGCTTTATACCAGGATGTAGTAATCCCCAT  
GCTTGATGATATACAAGCTACCTCAATATGCGGATAGCTCCCTTGTATGGAGATAACCTGT  
CAATAGCCTATGACCTTT CAGGTGTGGCGGCTCTGCGAGGAGACTTCACCGCCAAGGTAACA  
CAAGCCCAGACACTTTTTAACATGGGCGTACCCTTTGAACAGATAAACAGCCGCTTTGAGCT  
TGGATTTGAGAAGTTCACAGGCTGGGATAGAAGTTATAAGCCGTTTAACTGATGGCAGACG  
GAAAGTCCATGCAGTTACCTGCCGGCAATAAATCAGAAGTCATGTCTGAGGAACAGAAGAC  
TGCCCGGTGGAAACGGATTGACTCCCGACGTATTGGTTGGTGGAGTGTTGTTGGCGACAAGG  
TTGAGGAGTTATACAAAGAAAATGGCGACCTATTGGCAAAGGCCAAAGGTA AAAACCCCCAC  
TGAATACATAAACGCCGCTAAAACGCCTTGAATCAACTACCCCTGAATGGGAGAAGAAA  
CTCTCCGCCATGTATATGTCCTTGATAGAGGATTTTGGGGGAGAGATAGCCGGTGATTTAGG  
CATGAGGAAAAAGGCCGATGAGCCTTTTGACCCCTTACTGAAGCGGCTATGGCTTGGATAA  
AAAAGAATGCCGCCAAGACAGTGACTACCATCATGGAAACTGAACTTGAAGCAATAGCCGG  
GATAATAGAGGCTGGTTTTGCTGATGGTTTATCTATCCCAATATCAGTAAGCAGATTAGGC

AGTACTATGATGACAACCTCCGCATGGAAAGCCGCACGAGTTGCCAGAACAGAAGTGGCAAA  
GGCAGCCGGATATGGGCAACAGGAAGCGGCCAGACAATCCGGTGTGGTAAAACTCACACT  
TGGCTGGCTTCCAGAGATGAACGTACCAGAGATTTCGCACTCTTATATGGATGGCGAAACAGT  
ACCTCTTGGCAAGCCCTTTTCCAATGGTTTGAAGTATCCGGGTGACCCAGCGGTGGTGCAG  
ATGAGGTAATTAAGTCCCGGTGTACAGAGTTATACGGCGTAGATTAAGTAACAAGTTATCAA  
GCAAGCCCCCTTAGCCGGGGGCTTTTTTATTGGAGGCAATTATGGCTGAGACCATAGCCGAT  
ACACCTATAAACACTATCAATTGCCCATATTGCAGTAACCCGAATATCAGCCGGTCTGAGTG  
TGTTGATGAAGGCTGGTTATGTCTGGACTGCGGAAGAACATTTAATTTTTTTGAGGTGATGG  
GTATGACACGAATACTGGAACACAAAGAATACAACTCGCTATTAAGGCCGTTGATGAAGA  
AGCCGGCACTTTTGAAGGTTACGCTTCAACCTTTGACTCTGCGCCGGATTCTTACGGCGATGT  
AGTTGACAAAGGTGCGTTTACCAAACCATCAACGAGAACAAGAAGCGTATAAAGCTCTTA  
TTCAACCACAACGCTAACGAGCCAATCGGCAACATTCTTGAAGTTAGTGAAGATGATGTTGG  
GCTACATTTCAAAGCCAACTTTCCTTAGGCGTACAAAGGGCGAGGGAAAGTGCTGGCGCTG  
ATGAAGGACGATGTCATCAACACGATGTCCATCGGGTATGACACCATCACCGAGGAATGGA  
AGGACAAAATCCGCCACCTCAAAGAAGTCAGATTATGGGATATCTCCCCGGTTACCTTTGCG  
GCCAATCCTGAGGCCGTAATTACCGGGGTAAATCAGGGCGGGTATTATCCGCCTCCAATTT  
ATCCAAAGTTAAAGAGGCCATTTCCGCTTTACAGGCACTTGTGGAGTCTGCTGAGCAGGACG  
AGGAGCCGGCTAAGTCCACTCCCCCACTGTAAGAGACCCGGAAGCCGCTGAATTAGAGAA  
AGCGGTTAAAGACCTTAGGGCTGCTTGCCTAGGTTTTGACTTTCAAAAAGCTGAAGCCAGTA  
TCGCAAGCAATTTCAAGAAAATAGAAGGAGAAAGTAAATAAATGGAAAACAAGGAATTAG  
CCGAAGTCAAGGTGCAGTTGCTGACCTCAGGAATCATGCTGCCCGGATGGACGAGGA  
AGCCAAGAAATATGGCGCCGCTTCTGCCACCGCTCAGGCCACAATGGAAAACTGAATACC  
CGCATTGACGGGCTGGAGTTGAAACTTCAGAAAAACGCCATCGTACCACCCGGTGAAGGCTG  
AAAACGCCGAAAAGAAAGCACATAACCACAGCCTTCTTCAAGTGGATGCGGCATGGCAAATC  
AGGGCTGGAACCCGCTGAACGCAAAGCCCTTGTTCAGGACACTACCGGTCTTTATCTGGTGC  
CTGAAGAAATAGAGAAGGAAATCATAAGGGCTATTCCTGGGCTGAACATTTCCGCACCTTG  
GTTCTTCTCGCCCTATTACCACTGACAAAATCCGCAAGCGGACTCTGACCGAGGTGTCTAT  
GGGCTGGGGCAAGATAGAAACCGGTGCAAGCATCACCGAGTCCACCCCACTCCTGCCACT  
TCCTACATTTACGCCGAAGACCTGTACGGCCTGGCTAAAATCGGCGAGGATGAACTGGCTGA  
TGTGGATGCCAACTTGTCCGCCATTATCGCTGACAGCTTTGGGGTAGCAAGAGGCGAATCCG  
AAGAAGCTGCCTTTGCAATTGGCACCCGGGCATACGTATGAACAGCCCTGCGGTATCGCCGTA  
GACTCTACCTTGTGACCGGTATCGGTAGTGGCGCTGGAGCAGGGGCTGTGCGCACTTATGG  
CCGCACTTGGGCTACTGATAACACTGTCCTGTTGAAGACCTCCTGAAGTGCGAATATGCTC  
TGCCGGCTCAGTACAAGAAAGGCGCTGTCTGGCTGATGAACAGCAAGACCGAAGTGGCTCT  
GCGCCTGCTCCGTGCCGGTGGCAGCACTACAGGAGATGGTCCGTTCCCTTGGCAGCCTTAC  
TGATTGCCGGTCAGCCCAACACCTTTGATGGTTTCCCTGTTTACAACAACGACAGCATGAAA  
TATCCCGCTGATAACCACTGCCGGTATCAACGTCATATTCCGCAACTTCCAGTTGGGTTATCG  
ATCATTGACCGCCAGGGTATGTTTCATCCAGAGGCTTGACGAACTGTACGCCGAAGATGGTCT  
CGTGGGCTTCAAGGCTCACTTCCGCGTAGGCGGGGATATAATCCGCCACGCTGCCTTCCAGG  
TTATTGCCAACGATGTCTAAACCCTCAGAAGGGGAGCGGTTATCCCGCTCCCCTTACTAAAT  
TTAAGGAGTTGAAATGCCCATACGAGTTTCCAATGATATAGGTGCCACGATTACAGTCCGGCA  
CCCCAAGTCCGGGGGCTTTCCCGGTGAGTGTTCAGCTTACCGGGCCAAGTGGTAAAGACCTG  
CGGACAGCAAGAGTAGTCCAATATTATCTGGCCAAAGACTCTGCAGGAGATACCTTGTGTAC  
TGATGGCACAGATACGAGTGACGTAACCATCGGCACAGATGGCACACTTATTGCAGAACT  
GCAGCTGATGTTGCCGGCATAGTCAAGAGTGAGGCTGACGGCGACATTGATTTTGTCTGCAC  
AGTTATCACTACCAAACAGGCTTATCTTGTATCGTTCTTCCCTGATGGGGAAACAGTTATGTC  
TGCTGTCATGGCTTACACCGCTTAACCCCGATAGGCTTTGGGGGCTGAGCCTTTAATCAACC

CCCATTTTTAAAGAGGTATCAAGGTTATGAGACTTCGCATATTTAAAAGATTGCTATTCATTAT  
TTGGCTTGCTTAGAGCAGGTCAGATTGCAGATATAACCAGAGCCTGAAGCCACAGAATGGCA  
GAGGAGCGGCCTTGCCATGCAGGACAAGGCTTACGAACCAACTGAGAACAAAGCCGCTCAG  
ATTAACACCGAGAACCCAAGACGCAGGGCTAGAAAGAAATAGATGTACGCCATAATTGTCTG  
GCACCCAAACGAATAAAAAAGGGCAGGAATTCGTCCGGGTGGACTTTTACCTTGAGAAGGG  
CGAACCTCTGTATGATGGATACCATGTCCGTATGCCTGCCCCGGAACCTGAACGAGAAGGAAT  
TATCCAGCCTGACAAACAAAGACGGGGTAATCTCAAAGCTGATTACGAGGCTTTCGTGGAT  
AAGAACATTGGCTGGGAGATGAAAGATACCCCGTTTAACTGCCACATGTTTCGCAAAGCCTGC  
CACCTTGAAGACCTTGATGATGCGGTACAGGCACGTATCAAGCTTTTAAAGGCCAATTGTG  
CCGAGAATGCAAAGACCAGTACGGAGTTTAAAGCCATCCCGAATACTCTGCCAGCTGACTGTC  
TGCTCTGCCAAATACTCCATGGGGTTAAAGGAGATACTGCCCGGCACAGAACTAATGGAGA  
CTTGATATGGCTGTAATTGATATTGGGCCAGGGGCAATTAACCGGGGTGATAACTGGTCTTC  
AGGTTATACTCGTGTAGACTGTAACAACCCCGCTAATGACGACGGGATACTAGATACAGTAG  
AAGTGTGGGCAACTTCCCAAAGTTTGTCTGGATTCAAATAGGTACTTTTTCAGGGTCAGGT  
ACTAGTTATGATGACAGAGATTATGCGACAATCGGTTCAAGTAACTGCGGGTTCAAACAAAC  
CTTTACAGGTCTATCTATAGATGTAGTTACTGGTGATTTCTTAGGCTGCTACTATAGTAGTGG  
CGTTATCGAACGCGATACATCTGGGTTTGATGGCGTATATAGCGGAAATTCCAGTGGTGACA  
GGTTTGGTTCGGGTTCTAGCACATATATCCTATGGGCAGGCGACGCTATCTCTATTTATGGCA  
CTGGTGCAACTACCAGTAACACCTATGAATTATCCTGCACTGATGGGCTAAGCGTAGGAGAC  
ACAATAAAGGGAACTTACTCTTAAGCCTATCTTTAGCGGATGGGCTTAAATCCGGTGAAAG  
TTTGGGCAATACCAGAGCTTCTTTCCCGATAATCTCAGACGGATTGTCTTTGGGCGAAAGCC  
TAGCCGCATATTTAAAACCTTCTCCAGCTCTTCTGATGGAATTGCCTTAGGAGATGCCAAG  
GAACTCAGCTAACAATAATCCAGAAGTTAATGATGGGTTAAACTAACTGATATCTTAAAT  
ACTCAGGCAATCCTGAACGCCTCTGCTCAGGACGGCATTTCTTTGGGGGATACACCGCAGGG  
GAATATCAGTATTTTCTTAAGTCTCATAGACGGGCAAACGCTTTCGATACAGTAACAGCTG  
GCTTCTTAATTTCTTACTCTTATCAGATGGCGTTTCATTAAGCGATACAACGGCAGCACAGG  
CTATCCATAACCCCGCCCTTGATAGATGGTTTAAATCTCTCTGGCTTGCCCTCAGGTACCGCCC  
TGTTAAGTTTGGCGGTAGCCGATGGAGTGACTACAGGAGACACACCAAGTACACAAGTGAG  
TTTTAAGGTAGCTCTGGCTGATGGACTGATTACTGGAGACAGCGGATTAACCTCACTTATTC  
TTAACCTGCAAGCTATAGACGGCATTTCCCTTAATGACACTACCCTTGCCAATCTGATTTACC  
AACTGCTGGTGCAGGCAGGGCTTAAAGTTATCTGATACTCCATTAGCAAACGCCATATTAGAA  
CTCTTGGCTCAGGATGGTTTATCCCTTTCCGATAGCACCTATTATTCCAGCGCAGCCATTTAC  
AATATGCTGGTTTCTGACGGGCTAACGCTTTCGATTCCCCAGTACAACCTTGCACGCTAAA  
CCTGATAGTTCAGGAGAACATCTCACTCGGAGATACTGGCAGTATTATCTGCCAGTTTTTTG  
AATCAGTAACTGACGGCTTCAAGCTGGGTGATATCGCACTGAACTATACCAACGGACTTATT  
AACTCACTGTCAACCTGTACGGCAGAAACGGAACGGGAACACTACCTGCCCGGACTATCA  
CAGTAAACCTGCTTAACCGCAGTTCGGCAGCAGAATTAAGCAAAGAGCGGTTAATCTGGG  
GCTGAAAGACCAATCCATAACCTTAAATACAAAACTGAATAAATAAACAAGGAAATGAC  
CTTCAAAGACCAACTCACAAGTTGGTCTTTTGGTTTATAAAGGGAGGATTAAGTGGAATAA  
TTAAAGACGGATGCAAACCTAAGCGGTAAGTTCATTACCGAGTGTTACCGCAAAGGCAAGCT  
CATCTGGAAGGAAGAAAGCCATAACATCGTAACCACCGAAGGGCGTAACCGCATACTTGAT  
GTGATGTTCCATGGCACTACCCAGATATCCACCTGGTACTGTGGACTTGTGGAAACAGACAC  
TTCCCCTGATGCAGGTATGACTTATGACGTACCAACATTTACCGAAAGTACCGCCTATGATG  
AAGCGGCTCGCCCTGCTTTTGTGGAAGCGGCCTCCAGCTCCGGCTCGGTTACCAACTCAGCA  
AATAAAGCTGTCTTACCATTTTCAAGTACAAAGACAATGTACGGAGCGGCCTGTTTACGCGT  
CAATACCAAAGGAGACCATACCGCTGGAGCAGACAATGTACTGTACTGTTATTCCAAATTTA  
CCTCCGGGCGTTCTGTGGTAGACGATGATGTAATCAACCTGACCTACACAGTCACTGCTGCT

GATGATGGTGCATAAGGGAGGCTGATTGATGGCTACCTTAACAATACCGAACAGTGATAAG  
GGTTATACCTGCAATTTACTGTCCATGATTCTGCCGGTGCAGCAAAAAACCTGACCGGGTA  
CACAGTCACTTTGAAAGTCTGGAGACCTGGCGCACCTGCGACCTTGCTTGTAACCGGCGCTT  
GTACAATAAGCGATGCTGAAAATGGGGTTGTTACTTACACTTTGACTGGAACAGATTTTGCT  
CTTACCGGCACTTATCATGCCGAGTTGGAAGTACAATGGTATCCAGCGAAGTAACAACCTGT  
ACGGGAAAGCACCGGCAATTTACAGCATTACTGTAGCGGAGAGTGGTTGATATGGTTGATTAT  
TGCACCCTTGAAGAAGTTAAAAGAGAAGTAAATATTTACAGGTGGCGAGTCAGACGATATACT  
CCAAGCATTAAATAGGGCAAACCTAAAGACCTCATAGATAAGTTTTGTAACCGAAGTTTTGATA  
GCGTTACCACTACAAAGTACTTCGACGGAACCGCCAGCCCATTATGTATTCCAGATTTGATT  
ACGCTCACAGTCTCAAACCTGGACACAAACGGAGACGGAGTTTACGAGGCCACTTTAACCA  
CAAGCGATTATATTCTTTACCCCTTAACAGCACACCCAAGGAGTCCATTAGAATAAATCCT  
AATGGAACTATTCCAGTTTTGCCTCTGGTATTCCAAGTGGAGTTTCTATCACAGGAACATG  
GGTTATGCCTCTACTGTACCAGGGCCAATACACAGGGCCAGCATAATACAAGTACAACGCT  
GGTATAAACGTAAGAGACCGCCTTCGCTGATGTAGTGGGAGTGCCAGAATTAGGCCAAGT  
GCATTACTACAAGGGGCTTGACCCAGACATACATTTGATAGTTCAAGCCTATCGCAAGCAGA  
GGTATTTTTAATGGCCATCAATGTCCATGTACTTGGTGCTGATGAAATTATTAAGGCACTCAC  
TAACAAAGATATCTTATCTAATGTAAACAAAGAGCTGTCTAAACTAGCAATCAAAATGGCA  
AATCGAGCCAAGAAGGCAACTGTGGTAGATACAGGGCGCCTAAGAGCGTCAATCGCAACCC  
AGATATCAGACCTGTCAGCTGAAATAGGCACTAATGTTGAATATGCCCTTTTGTGAATTC  
GGCACGTCAAAGATGGAAGCCCGCCATTTAGAAGGTAGTTCTAAGGTGCTAGGTGAGGGTA  
TGTTCACTTTCGCGGCCAATAATTCGCAAGAAGACATAGACAAATTCAGCGATGAGATGGG  
GAAAATCATGTCCGATAGGTGGCCAAAATGAGTGTAGAAATAATAGGGAATGGCCTCAAGA  
CAAGGCTACAAACCATAACCGCTCTCAAGGCGGTTTTTTCTTGCTCCGAAATACCCAGTCA  
GTTAATAGCTTCCCGACCGCCTTAATTTTCCACACCGGTACAGAATATGACCAAACGATGGG  
TGTTACCAATATGCAGCTACATCACTTCAAGGTA AAAATCTGTACCCAAACCGCAGACCAGT  
CAAGCGGGCTTAACGCTCTGCTGGACTTCGCGGAAAACACAGGCGATAACTCGGTAAAGC  
AACCGTTGATGGTGACGTTACCCTTAGTGGTAAATGCGATACAGCAAGAGTCATAAGAACT  
CTGGCCAAGGGACTTTTAGCATGGGTGGTCATGTTTATCTGGGGACAGAATTTGAAATTGAA  
GTATGGGAATAATAGGAGGACAAAATGCCAGTATTAAGTGGTAAAGCCGGAGAGGTAAGT  
TAGGAGGTACTACAGTAGCCGGCATTAAATCATGGCAATTGGATTACACGTCTGAAGTATTG  
GACAGTACGGATTTTGGAGATGCGGGTGTGCGGACATTTGCGGCCGGGTGTTCAAGTTGGGC  
AGGCAGTTTTGAAGGCTACAAAAGGGTGCACCTTTAACCATTTGGATCTGAAGTCGCTTTGG  
TTCTTAAAGAGAGCCAAACGGCAACTCAAAAATGGACAGGACAAGCAATTGTATCTGGTAT  
CCACCCTGCAAATAGCATAGATGGGCTTACAGCCTATTCGTATGACTTTACGGGGACAGGAG  
CTCTCACAGTACCCACGGCTTAAGGAGTTAAAAAATGAGTGTATTATCAGGTAAATTGGGCG  
GAGTTTATAGCTCTGCCTTATTAATTGAAGGTTGTGAGGCTGCATGGGACGAAGTATAGAT  
GTCGATGTAACCGCTTCAGCTGACAGCACAGACTTCAAGGTGGGTACATATAGTGCCAAGTT  
TGTTTGTGCGGCAAGTCTGGGTGCCGGAGACATTATTGCAACCAATGACATCGTAAGTAAAG  
ACCTCTCTGACTATAAAAAAATATATGCATGGGTAAAATCCAGCGTGGCATTAGATACTGGC  
GATATCCAATTTCTACTGGATGATACCGCTCAATGTGCTAGTGCTTTAAAAGCGCTAAATCTC  
CCGGCTTTAAGTGCTAATACATGGACACGTGTTTTGCTGGACTTAGGAGACGCCAGTGGCTT  
AACTGCAGTCATTTCCGTTGGGATAAAACAGGTAGTAGATAAAGGGGCTTTAACCTCTGGA  
TAGACGACATAGAAGCTCTAAAGGCTATCGCTGGCATTAAAGTCGTGGCAGTTGGACTATACA  
GTAGATATCTTGGATAGTACATCCTTTATAGATGCCGGAGCTAGAACATTCTCACCTGGCAA  
CTCTCAATGGGGTGGCTCATTTGAAGGCTACAAGTATGGTATTCCACTTGGTATTGGCACAA  
ATGTGATATTAGCACTCGCAGAGGGTATTATCACCGGGCAGGCGTGGATGGGAAACGCATA  
TATAAGCGGTGCGCATGTGGCCTCAAGCCTTGACGCTCTTGTGACTTACTCGTATGACTTTCA

GGGGACAGGAAGTGTGAGGTTGCGTCCTTGTAATGCGTAACCTAGACGAGACAATTGTTTA  
TCTAATGAGAGTCTACAAGTGGCCGCTGGAATATACACGCAATTTGGTACGTACCATGCCTG  
TCAAAGACTTAAACACACTTATATTTGAGACCGATTATCAGGAACGTATGGCTACTTATCAA  
CAGTCATAACAATTTTGCCTTAATCCTCTCCGTAATATGCAGTTCAGAAAAACGTAAATACAA  
ACCCTCAGACTTTATTGGCAAACAACCTGAAAGGAAGATAAATGTCTCTAAACCAAGATCCC  
AAACTGAAGCAGATACAATTGGGAGAAACCCTTTTTACTCTCCCCACTGAACCTGAATGT  
GCTTGAAGATATAGAATGCGAATTTGGTTCTACCGGTGATATGGTAACAGCCTTGCAAGACA  
AACCTGTATCCACACTCAAGAAAATCCTCTGGATATTGATTAAGGATAACCATCCGGATATG  
ACTCCAGATAGCATTGGGCGAATGGTGGAAATATCAAGACATAGAACGGCTCAATGAGTCCA  
TTGCTGAAGTCCTGAAGTGAGGTAATTATGGCTAAGTCTATTGCCGATTTGGTTATTAAAAT  
AGGTGCAGATACCAAGGATATGGAAGCCGGTATTTCTTCTGCCAAGTTAAACTACAGAAAC  
TATCTGAAGGTGCAAAAAAACTGGCATAGGACTGATGGCTGTTGGAACCTGCGGTAACCTGG  
CCTAGGTGTAGCTGCGGTTAAATCCTACGCCGAACTGGTGATGCACTTTCAAAAATGGCTA  
CCAGAACAGGCATCAGTGCACAGGCATTATCAGAGTTGAAATATGCAGCTCAGATGTCCGG  
GAGCAGTATTGAAGACCTTGAAACTAGTGTTAAGCGTATGCAGATGTTTCATGGCAGACGCA  
GCTGAAGGTTCAACACTCGCTACCGAAACACTGGATAAATTAGGATTA AAACTAACAGACC  
TCCAAGGATTA AACCAAGAAGACCAGTTTTTAAAATTGTCTTATGCCTTGGCAGATGTGGAT  
GACGCGGGCCAGAGAGCCGCACTGGCCTTTGATTTATTTGGTAAAAGCGGAACTGACTTGCT  
CCCTATGTTTGCTGATGGCTCAGCTGCTCTAGCATTATTGCGACAAGAGGCAAACGACCTCG  
GAGTTACAATGGATGATGTCAGTGCCAACAGGGCAGCCGAACTCGGTGATTCAATTGAAAA  
ATTA AAAACTACCTTTGACGGCATGAAAGTTCAGATAGGAGAAGCACTCGCCCCAGCAGTG  
ATCAATTTAGCAAACAGTTTTACCGAAAACTAAAACCAGCTATCGCATGGTTATCAGAACA  
CCCTGAAGCCACAGAAGCATTATTA AATTTGGGCTTGCATTTGTGGGTGTTGGCGGTCTCCT  
GTTGATAATCCCCCGGATTGTTCAAGCTTTTAGAGCTATCAAAAATAGCCATCATGGAAGTAA  
GCGCCGCTTAATATTCCTTCAGACTTTGACAGGAGTTGGTCTTGTAAGGCTTTAGTTGGAG  
TTGCAGCGGCAGGTGCGATTATTTTTGGCATGAATAAGGTCGTAGAGGCTAACACAGAAGAT  
ATACCGGGATTTGCAGACGGGGGTATTGTA ACTAAACCCCACTGGCGATGGTTGGAGAGG  
CAGGTCCCCGAAGCGATAACCCCTCTCGGACAAGGATTTGGTAATACGGTAAATGTTACTGTT  
CAGGGTTCGGTCATAGCAGAACATGACCTTGCTCAAAGTATTGCTCTGCCCTGCTACAAGA  
TAAATCCCCTAATGCCAATTTAGGGCTGGCTTAA

>KBTCE1/KBVC2-1

ATGACACTATACTATCAGGACGACTTTGTGAGTATTTTCAACGGTAACTGCATTGAAATCCT  
AAAAGAACTCCCCTCGAAAAGCATAGACCTCGTAATAACTGACCCGCTTACGGTATAGATT  
TTCACGGCCGTGGCAAAGGTGCAGAAAAGATAGCCAACGATAAGTCCTTTGACAATGTAGC  
CCAGCTGATTCAACAGGTTATCCCGGAGCTGGTCCGGCTTCTGAAGGATGATGCCGAAATCT  
ACTGGTTCTGCTCAGGTGGTAGCCAGAAGCCTCTTATAGCTCAGGTCTGGCTGGAATTCATA  
AAACTCAAACCACAGGTAGTCGTTAAGAACCTCATAATCTGGGATAAGTTATACCCCGGCCCT  
CGGCTGGGACTGGCGCTTCCAGTATGAAACCATCTTTCAACTCTATAAGGGCAAAGGCATCA  
AATCAGAAGGCCACTGCCGGGGTAATGTGATATCCGCCCGTAAAGTAATAACCCAAATTCGG  
CGAACACCCCACTCCCAAAAAGTCCGGATATCATAGAGAAGCTTTTGCTACCCAAATCAAAGC  
CCGGTGATGTTATACTCGACCCTTTCCTGGGCGGTGGTACAACAGCCGCGGTTGCCAAGAAA  
CATGGCCGTCCTGCAATTGGAATAGAACTAATAGACAAATACTGCGAGTTTGCAGCCGAAA  
GATGCCGGGGCATAACATAACAATAATTTAATGATTAACCCCAAGACGATTGCCAAGGTGTT  
TAAGGCGTTCCGCCAACATCTTCCATTTCTTCGCCAAGGTCATCCTATGATCTTCTGTTCCCTT  
GAAAATAAAAATATAAAAATAACA ACTGCTACTGTCAATAAAGCGGCGATTATCACAATGTGC  
CCAAGAACAAAATTCAAAAAACCTCACCCTGCGATTAGCGATAAAAACCGTAGCAACAA

CGAAAAATATGCAAGCAAGAATAGTCGCAATTGATAGATGAATACGTCTTGTTAAGACCAG  
AACTGACGGAATAGCAATAACAAGGATATAAAGACCAATCCACCACCACAACATACTGTTA  
TCCTCCCTTTAGAGCTTTTTAGATTATCCGCCAAGAGGCATAGTTACGCAATAAGTTTTGTTA  
TATTTATAAATTTGAGGCAGTTATGCCATATAAGCTACCGCATCCATGTGCCACCCCGGGT  
GTCCGGAACATACTCTAAAAAGATACTGCCCCATCATCATCATGAGCAACAAGGGGTACCC  
CCTCAAGAACAGTTAAAGAAATCCCAATACGATAAGGACAGAGGCAGTGCTTCCAAGCGAG  
GGTATGGGAGGCAATGGCAAGCGATACGTATATGCAAATTGAAACAAGACCCCTATGCTC  
TGATTGTTTGGGGGCGGGTGGTGGTGGCGGCCACTGATGTAGACCACATAGATGGTAATG  
TACACAACCTTGTGAGTGAATAACCTTCGTTCCCTCTGCCACGCCTGTCATAGCCGCAAGACT  
ATTAGAGAAAACACTACGGATTTGGAAATAAACCTCGATAATCTAAATGTAGAACCACAGG  
GGCAGGGGGAGTCAATTCTCTACAGCTTAAAACACGGAGACCGCAGGCCGAACCTTCGCGC  
AAGAATTCGGGAAATTCGAAAATCGGAAATGAAATATGACAACAAGAGGTAGAAAACCCA  
AACCGACTAAAATACACGAGTTAAACGGCAATCCTTCTCGTCTCAATTTGGGAAAAAGAAA  
AGAGAAGGAAATCAAACCATCTACTGGTGCGCCCACTTGTCCATCATGGCTTGATACCGAAG  
CAAAACGAGAATGGAAAAGAATTGTTCCGGAACCTTGCCAAATTGGGCGTTATTACCATGATT  
GATAGAGCAGCCTTGGCTGGTTATTGCGTAGCGTACAGCCGATGGCGTACTGCCGAAGAAG  
AATTGGGCAAGGGCTTTACCTACGAATATTATGATTCAAAAACGTTTCAACTCAAGCGTACT  
GTAAAGCCAGAAGTGCAAATTGCCCGTAACTCGCTCAATCAAGTCAAGGCGTTCTGCTCTGA  
ATTCGGATTGACGCCTTCCCTCGCGCAGCAGACTAGTACTGCCGGGTGAACCGAAGGACGAA  
GACCCTGTAGACAAAATGTTAAAAGAGGCTGGCTTATAGATGAATGATTATCAATCAAGAC  
GCGGTAAACAGGGCACTCACATTTATAGAGAACCCTGAAACATAACCAAGGGAGAATGGGCAG  
GCCAGCCATTCAAACCTCATGGCATGGCAAAAAGATATAGTAACTCGGCTCTTTGGAACCCTT  
AACCTGATGGCACAAGGCAGTATCGTACATGCTATATAGAAGTACCCGAAAAAATGGAA  
AATCAACTTTGGCTGCTGCTATTGCCAATTACCTCTTGTGTTGCTGACGGTGAAGCCGGTGCTG  
AAATCTACTCGGCTGCAGCTGACCGGGGACAGGCTTCCCTGGTATTTAATGAAGCCGCTCAC  
ATGGTTCGCACCCACCCTGCACTTCTATCCCGGTCTAAAGTGCTAGACAGTGTTAAACGCAT  
AATCATACCCAGAAACAACCTCGTTCTATCAAACCTCTCAGCTGAAGCATATACCAAGCATG  
GTCTTAATGCTCACGGTATCATATTTGACGAACTGCACACTCAGAAAAATAGGGAGCTCTGG  
GATGTACTCACTACTTCAGGTGGTACCAGACGGCAACCATTAACAGTCGCCATTACCACTGC  
TGGAGTTGACCGCAATAGCATCTGCTGGGAACTACATGACTACGCCCAGAAGATATTAAGTG  
GAATAGTTGAAGACGATACATTCCTGCCAGTTATCTATGCGGCAACTGACGATGACAATTGG  
GAAGACGAGTCTGTCTGGTACAAAGCAAACCCGGGGCTTGGTGAATTCGCTCTATTGATGA  
AATGAAGCAGATGTACCGGCGGGCAAAAGAAACCCAGCCCTTGAAATGACCTTTCGCCAA  
CTCTATCTGAACCAGTGGGTATCATCATACGAGCGTTGGCTCCCTATGGATAAATGGGACAC  
ATGCGGTGCGCCCTTTGCCCTGAAAGAATTGGACGGGCAGGATTGTTATGCTGGGTTAGATC  
TGGCCAGTACCACAGACCTGACCGCTCTAGTCCTAGTATTCCCGAATGGAGAAGGCGGATTT  
CAAGTCATACCGCACTTCTGGATACCTCTTGATAACATCCATGAGGCGGCCAAACGCGACAG  
GGTCCCTATCCGCTATGGTTAAAACAGGGATTAATCCATGCAACAGCCGGCAACATCATCG  
ACTACACTGCCGTTGAAGCCACTATTGACGAGTTGGCAGAGATATACCACATCAGAGAAATT  
GCCTTTGATAACTGGAACGCCTGCCGGCTAAGCCAGGACCTTACGGATAAGGGCTATACCAT  
GGTCCCTTTCTCTCAGAGCGTTAAAACATGTCACCGCCACCAAAGAATTAATGAACATCA  
CTCTGAGCGGAAAACCTTAAACACGGCGGGCATCCAGTGTTCGCTGGAATGCAGACAATAT  
GATGGTCTATCGAGACTCTAACGATAACCTCAAGCCTAACAAACAAAAGCCACTGGGAGA  
ATAGACGGCATGGTTGCACTAATCATGGCCCTCGATAGAGCAATTAACACGAAAATATTAC  
GCCTCACTCAGTCTATGAAAATCGTGGCGTCATTTTCAATTTGACCTTTAACCACTGACTATTAT  
CCCCAGGAGGACTATATGGCTAACCTATATTCAGGGTAAAACAGCTATTGTCTGGTATAAC  
CCGCCGCTCTGAAGGCGTAAACATCACCGACCCACGATATTGGAACCATTATGCTATGGCAT

ACTCCGGAGTGAACGTCACAGAGCAAACCTCCCTAAGAGTCACAGCCGTCTGGTCATCTGTA  
AGGCTCTTGTCTGGACATTGGCAGGACTACCTCTCGTTGTGTACCAGCGTATGGAACGAGG  
TAAACAAAGAGCTGGGGGTATTAATCTTCATAAGCTTCTCCACGATAGCCCCAACCCCGAAC  
AAACCTCTTTCACATTCCGTTCCCTTACTTCAAACCTCACCTACTACTCTGGGGCAATGGTTATG  
CAGAAATTGAATTTGATAACTGGGGTAATCCGGTGGGCCTCTGGCCTATACCACCCTGGCAT  
TGTGAACCGTCTCGAACACAATCAAAAGAACTGTATTACAAAGTCACCTTACCGGATGGACA  
AATTAATAATATACCTCCATACCGAATGCTCCATTTTATGGGATTGACTACTGATGGAGTAC  
ATGGTTTGTCCCCATCGCATATGCCAGAGAAGCTATCGGGCTTTCACTTTCAGCAGAGGAA  
TTCGGTTCAAGTTTTTTTTGGGCAAGGGACTAATATCGGTGGATTTTTTACCACCCTGGTCAA  
CTAAACGATAAGACCCGAGCTAACCTGACAAAAACCCCTCGCTGAAGGTTATGAAGGTTTATC  
TAAAGCCACAGAGCTATTTTACTTGAGGAGGGTATGAAATTTGAAAAAATTGGTATCCCTC  
CTGAAGATGCACAGTTTCTTGAGCTCAGGCAATTTTCAGGTAACCGATATCGCTCGAATATTC  
AACGTACCTCCTCACATGATAGGAGACCTCTCAAAGGCAACATTCTCAAACATCGAGCATCA  
GGCCATAGAATTTGTGGTTCACACCATGAGGCCGTGGTTCGTGAATTGGGAACAGGAAATCA  
ACCGCAAGCTCATGTGGACGCTCGGCGATGATTACTTCGCTGAATTCGTAGTTGACGGCCTC  
CTGCGGGGGGATACAAAGAGCCGCTACGAGTCCTACGCTATCGGCAGACAATGGGGCTGGT  
TATCTGCAAACGATATCCGGTCACTTGAAAATATGAACCCGATTAAGGGTGGAGATGAATAC  
CTTGTCCCCTTGAATATGATACCAGCTGGCACGCCATTAAGAGCCTGATCAGAAAACAAG  
TAACAATCGCTCCGTACTTGCGGCCGTCATCTCTCAGATTGCTGAGCGAGAAACAATCAAAC  
TCGCACGAGCAGTTAAAAAATACTCTGGCCAAACCCCTGACTCAATGGATAGACGACTACTAC  
CGAGACTTGCCAGATTACATCGCGGTGAAATTTGCATGCAGTGGACTTAGACTACCAGAGGA  
ATATGTCAGTGAATTCACCCGTCGGTATGTTGAAGATTCTAAAAGCCAGATTACCACGGCCA  
CTGAGACTAATTCTTTAGCAATGTTAATTGACACATGGAAGATAAACAGATGCCAAGTTATA  
ACAAACACCGAAACAGCATTATTGGAGGATTGGTATGCCTAAAACCTAAACCCGAATATGTA  
ACCCGTAGTTACGATGTAACCGAACTCAGGGCAGAGGCTGACTCCGAAGGCACTCCCAAGA  
TTAAAGGCCATGCCGCTGTCTTTAACAAACAAAGCGTTGCCTTAGTGGGATTTTCGCGAGCAA  
ATTCTGCCTGGCGCATTTCGCAAAACAATTACGAAATCAGATATTCGAGCACTCTGGAATCA  
TGACCCAAACTATGTACTGGGGAGAAATAAGAGCGATACTCTCCGTTTAGTCGAGGATGAA  
AAAGGCCTTTCAATTGAAATTGACCCGCCGATACTCAGTGGGCCAGGGATCTAATGGTATC  
CATCAAACGCGGTGACGTCTCGCAAATGTCATTTCGGATTCCATGTGATTAAGACCACTGGG  
ATAATGATAACAGCCTCCGAACACTGGTTGAGGTAGAAGTGTGTTGATGTGTCACCGGTGACT  
TACCCTGCATATCCTCAGACAGATGTATCTGTCCGGTCAGCCCTGACAGAAGCAGGCATAGA  
CTATAACAACCTGTCTACCATCATCACCCGAACCAGCCATCAAATACCCCTCACCCAAACTG  
ATTATGACAACCTGAATACTGCTATTAACGTACTAAGGAGTTATTTGCCCAAAGAGGAAAT  
CCGGTTCAACCGGGCTCTCGCACTGACGGGTGTGTGGCTGAGGTGGAAATACTCCGCCGGCA  
ATTAGAACTCGTAAAGTACGGATAGATATTAACCTAAATTAAGGAGAATACTCAAATGA  
CCAATGTTGAAACCTAAACAAACGCAAGGCTGAATTGATTGCTCAATCTGAAGCCCTATTA  
GCTCTGGCAACTAAAGAAACCCGGGGATTGACCGACAAGGAACGGGAAGACGCTGATAAGC  
TAATGGGTGACATCAAATCCTTGGGTGATCTCATTACCCGCACTGTGGAACCTTCAGCAAATG  
GAGATGTCTGTCGGTAAATCTGACAACAAACCCACCAATGAGACTGGATTCCGTAACCTCGG  
CGAGTTCATTCAGGCAGCCATCGCCAATCCTCGTGATTCTCGCCTTACCCGAGCCCAGACCA  
CGGGTGC GGCTGCTGACGGTGGCGTACTTGTACCTCCGCAGTATCTAGATGAACTTCTGGCA  
GTCAAGCCCGCGGATGGTATTTTCCGCCCTCGTGCCCGGGTTATCCCTGCTGACAGTGCCCA  
GCCTGATGCATCAATATCCATGCCTGCCATTGACCACTCCGGTTCTTACGGCGTTTATGGGGG  
TGTAACCTGTCAGCTGGATATCTGAAGGTGGCACTAAACCAGAACTGGCATGAAATTCAAA  
GAAATCACCCCTCAACCCAGCGAAGTCGCTGCGTATATTCCGGTAACTGATCGCTTGTGAG  
GAATGCGCCCAAGGTTTCTGCTACTCTGACTGGTATGCTCAGATCAGCCATTATCGGTAGCG

AAGACTATGCTTTCTTGCGCGGTAATGGTGTAGGAAAACCCACCGGAATTATCGGGCATGCT  
TCCACCAAGACTATTACCCGTACCACCAGTAGTGATGTTGTGTTGCTGATATCCGTAATATG  
TTCGCTGCCTGTCTTTTTGGTGGCCGCTATCTTTGGATTGCCTCTCAGACAATCCTGCCTAAA  
CTGATGACCATGAAAGATGAGGCGAACAACTCATCTGGCTGCCGAATGCAGTTGATGGAC  
TACCCGGCAGTCTGCTCGGCATCCCTGTATTTATTAACCCTCGCAGTCCGGTCCCTGGTAGTG  
CGGGAGACCTCGTACTGGTGGACCTGGAATATTACCTGATTAAGGATGGATTCCGGCATAGCT  
GTTGAGGCTAGCAATGCCCCCTTGTTTACCAGCAACAAAACCGTCATCAAGGCTTACCGAAC  
TGTGGATGGACAACCGTGGCTTACTGCCCTGTCCAGTTGGAGGATGGAACCTACCACTGTGA  
GCCCCTTTGTAGTACTCCAATAAACAAACAACTGGGGGTGGAATTACCGCCCCCAGTGAC  
TAACAAAGAGAGGAATTGAATGAGGTTAACTGATAAAACCAAAAATTGATATTGGTCTGGTA  
CCCCAGGCTCTTAATAACACCAATGCAACTGGTGCTTATTACAAATTAAGCGGGTACGGTCT  
GGTGCTGGTTTTACTGGTAGTAGGTGCAATGGCAGCCACTAAAACCGCTATCGTTGAATTAT  
TGCAAGCTAAATCTGCTACAGGCACTGATGCCAAAGGGATACCGACCACTGCAGGTCAGTT  
GGCCAAGGCTACAATCACAGCTAACACCGAGGTAGTAGCCGGCACCATAGACCTGGCATCG  
GTCGCAAATACTGATGTTATTACCATCAACGGCGTTAGTTTTACTAAGGCGGGCCGCTACCGA  
TACTACTAAACAAGAATTTGCAGATGCGGCAGGGCTGGTAGCTTGTATCAACCATGCCACCT  
ATGGCGTACCTGGGGTAACTGCCAGTGCGGCAAGTGCAGTAGTCACTGTCACAGCCACTAAC  
CCCGGAGATACTCTGGTAACTCTGGATAAAAACAGAGAATGCCGGTACTGTTACCCTGGCAAC  
TACAAAAGCCATCGCCTATGTTGAAGTGAATACCGACGGTCTCGACCATAACAATGGATTCA  
TTTATGTAGCTGCGAAAGTCACAACCACAGCTAACACTGTGGCCTCTATTGCCACAATCCGG  
GGAGATGCTGAGGTTACACCTACCCAGGTTGTCTCAGCCTCTGCCCACTATTAAGCTTAATC  
GCCGGGGGGTGGCAATTCCTTCTACTCCCCGGCGGGAGTCAATCATGCATAAAAATATTCTG  
TTTGAAACAACCAACCTTTATCCAGATGAACTGCAATGCTGGTGCACATCAGTATCAAGCG  
AGGTATTAAGATGGCCTTAAAAATAAATACTGCCCCACCGTAGAACCTGTGAATTTGGCA  
GAGACCAAAATACACCTCAGAGTCGACAGTTCAACCGAAGACAATTATATAAATTCACTGA  
TTAAATCCGCCCCGGAAGCAGTAGAAAACCTCACTGGTCGAGCACTCATCACCCAGACGTTA  
GAATATCTAATCAGCAATTGGCCAAACCATGAAATCAAGCTTCCTCGCGCGCCTTTACAATC  
GGTAACCAATATTAATACACCGACAGTGCAGGGAATGAATATATACTTGACGTCTCAAAT  
ACGTGCTAAACCCTGATACCGAACCGGGACTAATCGTACCGGCTATCGGTTACAGCTGGCCA  
TCAATTAGTCTGAGACCCACTGGTGCTATCACCATCAACTATATTGCCGGATATCCTCCATCA  
AATAGTGAACCTCCCTGACTATCAGGCAAACGTACCTGCTGGCCTTAAACATGCAATATTGCT  
ACTGGTGGGGCACTGGTATGAGCAACGCCAACCAATCAACATTGGCACCTCGGTAACCTCAA  
ATACCGTTCACCGTCAAATGGCTCTGCGATTCATATAGGGTTCATTACTGGGGATTTGAGGC  
ATGACATGGACATAGGCAAATTTAATCATCGAATAACTATTGAAAAACCCACCACGAACCA  
AGATGCAGCTGGAGGAATTACTCAGACATGGGCGGCTTTTGCCACTGTTTGGGCTTCGATTG  
AACCACTCGCTGGCCATCGGCTATTCCAGTCTAAGCAAGTAAATGCTGATGTTACCGGGGTT  
ATCAATATGCGCTATCTAGCAGGTGTAGAACCCAATATGCGTGTTAAATACGGCAGTCGGAT  
ACTTACCATTATCTCCATAATAAACACCAAAGAGCATAATATTGAACTCCAGTTGCTTTATA  
AAGAGGCCCTCGATTAAATGCAAATAAAATTAGAGGGACAAGCAGAATTACAACAGACTAT  
TTTAAACTGTCAAATCCGTACAATCCGATAAAGTAGAGCCGATTCTCTTTGATGCAGCCA  
AAATGGTTAAAACCGAAATTAATCTCGGGTACCGATAGATACTGGACGATTGAAAAAAGC  
GGTCATCGCCAAGAAGCTGAAACGACGTGATAATTATAAACCGGCCCATCTATTGCTGGCA  
TCGACCGCAAGAAAGCCCCACATGCCCATATTGTGGAGTTTGGAAAGCGCTGGCAGGTACGC  
CAAAAAAGGGAAACATAAAGGCCGTTATTTTGGCCCTATGCCAGCCAAGCCTTACTTTCGTC  
CGGCTTGGGATACAACCAGAGACAAAGCCCTTAATCAGATAAAGACCGGCCTGGAAAAACA  
GATAGAGAGTGTGCGCAAATGAGCTTTGAAACATCGTTTGTGACATGGCTAAAAGCCAACGT  
ATCGCTTGTTACTAACCGCATATATGCGGTTATTGCCCCCAAGACATTACTCAACCTTACTT



GGTATACACCCTCATATCCGCACCCAGAGCATATTCGCACTCTGGTGTCTCTGGAATAGTTG  
AAGCCCGATATCAAATAAACATTTGTACCGACTCCTATGCAACCACCAAGAGTATTGCCAAG  
CAGTTACGGGATGCTCTAAGTGGTTACCGCGGGGCTATTGGTACAGAGATTGTGTATTCAGC  
TTTCTGTGACACCGAATTGGACAGTCATGATGACAACTCAGAATTATACGTCAGTATCAGTG  
ATTACATGATTTTCATATAAAGAGTAGAAAGGAGTTAACACAATGGTAGAGGCAATAAAGGC  
TTATGGTACTACCCTTGCTCGGGCTGGCAACACCATCGCCGAATTGACTGGCATTAAATGGCC  
CAGCCATGTCAGCAGACACAATTGAGGTAACCTCATCATCAATCTGAGAATGGGTTTCAGGGA  
GTATATTCAAGGGCTGAAAGATGGAGGCGAAATATCGCTCGAGGGAAGCTTTATCCCTGGG  
GATACGAACGGACAAGTTGGTTTTGATATCCGACTTTAACGAAGGCAATTCACAAACATTTGT  
AATTACATTCCCTGGCAACATCGCGACCTGGTCTTTTTCTGGTATCGTACCAAGATAGAAA  
ACCAAGCGCCATTTGATGGCAAATTAGCATTAAATGCTGCCGTTAAAATAACCGGCAAACCT  
ACCCTCGGAATAAGTATATCTGATGGATTGACCACCCCGTATTTTGCTATATCGGAAAGCGC  
AGTAATTACACCTGTCCCAGCCGAGATAAATACACCTATGTAGCTACTGTATTGAATGGTA  
TAACTTCGGTCACAGTCACACCTACCGCCTTAACCGGGGTAATAACAATCAATGGTAACGTG  
GTTGCTACTGGTATTGCATCCAGCGCGATAACTTTGGGTGCAGCTGGCAGCGTAACCGTTAT  
TACTATCGTAGTAACTGAGACCGGCAAGGCCCCCAAGACTTACACAATCTATCTCAGCAGAG  
CGAGTTAAGGATAAAATTATGACTGAAATAGTAAAGGGTACACCTATTACCCTGGATAAACT  
CCGTAACCTGCGGCTAGATTTAAATGCCATGGCTTTATTTGAAGAAGCTACCGGTAAGAGTG  
TGTTTAAAATCGGCTCGGATATGTCTGCTCGTATTTACGAGCGCTACTCTGGGCTTGCCTCC  
GCTATGAGGACAAGAACCTTACGTTGGAGTCTGTGGGAGGAATGGTTACTCCCCAAAATTTG  
GCAGAGATTAACACTCGGTTAGTGGCAGCCTTCACCGCTGCTATGCCCGAAGTGGAAGTGA  
AGTAAGCCAGGGGGAAGCTCCAAGCCGTTAGTCTGGCTGGAATTGTGGGCCACGGCCCGCT  
ATGACCTCCATCTTACAGAAGACCAGTTCTGGCGGCTAACATTGAAGGAATACGCTGCTCTA  
CTAAAGCACCACCGCATCAACATGGAATGGCAGGATTACCGGGCAGGTCTAATATGCTCAG  
TCTTAGCAAACATTAATCGAGACCCCAAAAACATACCAAACCCTACACTCCAGCTGATTTTC  
ATGCCTCAAAAAAATCCGACGAAAATGACACCTGAGCAGATGCTTGCTCAAATTAACCTCTT  
GAATACCGTATATAACGGGAACGAGGTCTAAATTATGGCCAGTGAATAGCTAACTTATTCC  
TCACTTTAAGCGCCAATACCACTGATTTTCGCTGATAAAATGCAGGGCGTGCATAAATCCCTC  
GGTAAACTCCAACGCTCAGTTGATTCTACTGGTCAGAATTTCCAGAAACTGGGACTCAAATT  
TGCAGCTGTGCGCGGAGCTATGCTTGGTTCGCTTGGCTTACTGGTAGATAAATACTCTGAAG  
CTGGCGATGAGATAGCCAAAATGTCAAAACGAACCGGTTTTCGGTGCTGAATCTCTTTCAGAG  
TTGAAATACGCGGCGGGTATGAGTGGTGCCAGTCTAGATGACCTTGAACAGCTACCAAAA  
AAATGAGTAAGGCCATCATAGATGCCAATAGCGGGTCCAAGGCCATGATAGATAATTTTGA  
CGCCCTTGGTTTGAATGTTACCGCCATCAGGGATATGGCACCAGAAGAGCAGTTCTGGACTA  
TCGCTTACGCCTTAGCCGATATGGAAGACCAGACCTTGAAAACAACACTCGCACAGGATTTG  
TTTGGTAAATCAGGCACTAACATGCTGCCTCTACTCGCTGAAGGTCAGGCAGGCATTGCTTC  
TCTACGGCAAGAAGCCCACGAACTAAACGTGGTATACAGCGATGAGTCAGCAGCTGCGGCT  
GAGAAATTTTCAGGATAGTAAAGAACGCCTGACAACTGCCATGCAAGGCATTGGGGCAACTA  
TCGCCGAAACGGTCATGCCCAAAATCACCGAACTTATAAACTCTCTAACCGAAAAACTAAA  
ACCTGCAATGGCATGGTTATCCGAACATCCCGAAATGGTTGATGCCTTTGTTAAATTTGGAG  
CTATCTTCTTAGCTGGTGGAAACATTAATGATTGGTATAGCACAAGCACTAAAAGCTTTTAAA  
CTGATACGCACAGCTGTAATGGGGGTTTTAGCTGCTATGGCAATCTTACAAGGTATGACAGG  
CGTTGGGTTAGTCAAGGTTTTAGCTGGCGTTGCTATAGGTGGCGCTGCCATCTTAGGCATGA  
ATAAACTTGTGACGATGCCATGAATTTCTGATGACAGCGGCCCATGACACAAGTGTACTCT  
GCTGCAACTGGGGTTACTGAGATATCCGCCTCCGGAAACATCCCGGATTTGCACTGGGTGG  
GACAGTACCAGGACCGATTGGCTCACCTACCTTAGCTCTGGTACATGGGGGTGAAACTATTA  
TTCCCGCCGGCCAATCCGGAGGAGCCATGGGCGCAACTTTTAAATCTGAACTTAAACGGTGCG

GTAATACGAGAAGATGCCGACATAGGCCGTATTGCAGAGCAAGTATCTGAGGTTATCCAAC  
GCACTTATGAGCGGAAACTCAGACTGGCAGGTGCCTAAATGGCCAACAGCGTATCATTAAAC  
GGAAGTACCTCAGCGTTTATGGAATTACCATCACCCAAGCCAAAATACACCAAACGGCTTT  
TAACCGTGATGTGACCCAATTAGATACCAGAGCTTTCGCCTCTCATGGTAAAAGAGAGGCC  
GCAAAATATCAACTGAATTTGTAAGTGTGGGTAGTAGTCTATTAGATATTCATACCAGATTG  
GCATCAATAAAAACGGCTACTAACTACAGTAGAGACTGGCCAACTGGTATTTCGATTTTATA  
TGGTATCTACTACAACGCTGCTCTGGATGAGATAGACGCTGAAAACCTTGACCCAGACCAGCA  
TGTCTGGCGTCATATCGTTCATTTGTGCAGATCCTTACGGCTACTCTACCACTGAAACCGATC  
AGACTGACAATATAGACACAGACCCGACAGCGGTAAGCATAACTGTAGGTGGCTCGGCTAT  
TGCCTTGCCGGTTTATACCCTGACAGCTGGTGTGAGTCTCTATCCGGGCGGATATCCGTCAAA  
ACAACGATACCGGCGAAGAGTTAATTTGGGATAACAGCCTGGTTGATACAGACGAGTTGGA  
GATAGACACCGAACACTGGGTAGTCAAAAAGAACGGCACGGAGTCTATGGCTGACGTATCC  
GGTCAATTCCCAAGGCTATTACCTGGGCAACCAATGCAATTGTTATTACCGGATTTGGAAT  
AAAGGGCACATTACAGACTGTATTCCGAAGTAGATATATTTAAAAGGAGTTAATTATGGCTA  
ACGCACTGTACGCAAAGGCCAAAACAGGCATTTCTTTCCAAACAAATTGATCTACTGAATGAC  
ACTATTAAGGCAACGCTAGTTGATTCAGCTGACTATACCCCGGACCTTGCTAACCATGATTT  
CATTGATGATGTACCTGCTGGGGCAAGAGTGGCTACGGTTACATTGTCCGGCAAATTCGTAA  
CAGGTGGTGTGTTTGTATGCTGCAGATGTTACCGCCAGTGCGGTCACAGGAGACCAGTGCGAG  
TACATCATTATCTGGCAAGACACCGGGACAGAAAGCACCTCACGTCTGATTGCGATTATAGA  
TACCGCTACCGGTCTGCCATTACTCCCAATGGGGCAAATATAAATATAGTCTGGGATAACG  
ACGCAAGTAAAATATTCGCTCTTTAAGGGGGGTGTATGTATGTACGCAATTATTGACAGCAC  
CCAAATAAATAAAAAGGGGCAGGAGTTTGTCCGGGTAGACTTCTGTCTGGAAAAAGGTGAG  
CCTCTGTATGCTGGATATCATGTCCGTGTGCCGGCCCGTGAATTAACCGAGAAGGAAATGAC  
CGGGCTGACCGGTAAAGACGGGGCAATCTCAAAGGCTGACTATGAGGCTTTTGTAGATAAA  
AACATAGGCTGGGAGATGAAGGATACCCCGTTAATTGCCACTTTTTTCGCTAAGCCTGCCAC  
TCTTGAAGACCTCGATGATGCGGTACAGGCACGTATAAAGCTACTGAAAGCTAACTGTGCCG  
AGAATGAAAAGACTGGCTGGGAGTTTAAACCTGCACGGCAACTCTGTCCGCTTACTGTATGT  
TCTGCCAAGTACTCCAAAGGCGAGAAGGAGATAATGCCTGGTACAGAACTAATGGAGGCTT  
GATATGAGCTTAATTGATATCGGCATTGCAGCTATCAATCGAGCGGGTAGCCTAACTTATAG  
TCTGACTATTCTGGAGGCTTCCAAACCCGCTAACGACACCGGAATCCTAGATGTTATTGAAG  
TTTGGTTCAGTTAAGCGCTTCAGGTGTTAAAGTAGGAACTTTTTATGGTTCTGGTACAAGTT  
ATACAGGGAGAGATTATGAAACTATAGGGTCAGTAGCTTCTGGGGCAAAGCGAACATTTAC  
AGGTTTATCTATAGATGTAACACTACAGGAGATTTAATAGGAGTTTATTATTCAGGGGGCCGTC  
TGGAGATTGATACCTCTGGGGGTCTTCCCTTATGTATAGTAGCGGAGATGCTTTCGGCAGT  
ACTAAAACCTATAGTTCTGAGAGTTTCCCGATATCTCTTTATGGCACTGGTGCAACTTCTGCC  
GCAACCATTTCTCCATCAGCTATAGCACCCACTCTTGCTTTTGGCACTGCAAAGTTAAACCAA  
AACATTGTACCTTCAGGAATTTCTGCCGGTCTTATTTTTCGGAACGGTTAATCTAAACCTGAAC  
ATTCTACCCTCTGGAATTGCCAGCACTTTGGGCATTGGCGCACCTATCATATCATTGGTGGG  
TTTAGTATTGCGCCCAGCGGTATAGCTTCTACACTAGTCTTTGGTATAGCTAAACTTAACCAG  
AACATCTTGCCATCTGGTATAGCATCAGGAATTACTTTCGGTAAACCTGAGCTTAGTATCATT  
GTATCAGGCGTTATAAGACCCAGTGGCATAACCATCTGGTGTGGTATTTGGCACGCCTATTCT  
CTCGGCCGAGGCTGCATATACCGCCCCAAAGCAGATATGTAGTTGAACTGCATAATCCGA  
TAACTCAGGGCTGGCGAATACCTTCAAGCCACAATGACTCCTCCAGCGCATGGGAAGGCGA  
AACCAAGGCATATGATGGCAGCATCGCAACCGGTCAAGCATATACATTAACCACCAATGCA  
AAACTGGAAGTACCTGCCAGCCCCTTATACACAAGTAAAATCAGAATTTATGGCGGTGG  
AAATAATAATGGGACTCTGTATTTCCCAATATAGTGATTGATGTGTATTACAGTGGTGCTTG  
GCACAATGTATATACGGGTGGGATAACAATATGATGCTTGGGTGGAGAAATCTTTAGCGTCTC

CTCAAAC TATAGAAAAAGCCAGAGTTTCCTGTACCGACACTTTATCAGCTTCATATCCGATT  
AAGAACTTTTATGTCACAGAATTCTGGTTCTATGCTGCTCCAACCGGCGGGGAGTTGCTATCT  
ATACTTGAGAATGCCACGCGATATCCATAGAACAATCATTAAATAAAGCCCCTGTTATTTCT  
CTTTAGTTTACCAGCTGATGATGATAAGTCAGCGCTACTCACCAGAGCAAACGAAATATGGA  
TAAGGGATATCGCCAATAATACTGTTTTGGTCTCTGGTATTCTGGACGAACGGGTGGATACG  
CGATGATAACTGACGTTGAATACACCGGATATCTTACCCAGCTAGCCAATGAATGGATTGAT  
AGCTATACCTGCGCATGGGTCTCTCCTCAAACAGCCCTAGATGAGATACTGGCATATCAAAT  
ATCTCCATATCCAATTGTTAGAGGCACATGCGAACATGGAGGTACTACTAGCCTTACGCTTA  
CTAATTGCACCATACTAGCAGCATTGGAAAATCTCCAGAATATGTTTTCCGCGGCCACATG  
GAAGTAGACAACAACCGCCAACCTGAATTGGTATCGACTGGGTGCACATGGATACGCCGGCC  
AGCAGATCCGTTACAGAAAGAACCTTGTTGGTATTACCCGGACAATAAATTACCGTCAGTTA  
GCCAATATTATATATGCCTACGGTGCCGGTAACTGGGGGAGTAAGGTTAAACTTTCCCAAGC  
AACCGGTTACTCTTATGACTATGTGCAGGATACTACCTCACAAGCTACATGGGGAGTGATTA  
CGCGGACTATCTGGGATAACAACCGACAAACGCCAATTTGTTAAAAGCATGGGCAGACCA  
GGAATTGATTATCCGCAAAGACCCCATTTATACCTATAAAAATTAAGCTCCTTGATCTCACAA  
GAGAACCCGGCTGGGAATTTAACAAGATATCACTCCTTGACCCGTATCAAATTTATTGATGAA  
GAGTTGGGCATATCAGTTGAAACCCGCATTACCCGCATCAATAAGCGTGACTTATCTAATCC  
ATATGACGTAGATGTAGAACTGGCCAACCTCCGTTGTTGATATCAGCGATACGATTGTAATC  
TATCACGTCGCAAGTAATAGTCATAACCTCAAAGCTAACAGCCCCACAACCAAAATTTAGC  
CATCATTATAAGCAGGTGTGTATGAATTATCACATAAACCGTATTCAACTAGGGAGTAACCT  
ACTCCATGCCCGCTCAGGGGCATTGGCAAATACTTTGTGCGACTGGAATACACATATTGGACC  
CAGAAGAATGGGTGCGGCGCAATTATGAAGTGTGGTGTGATTATTGGCATATGTCTCAGGTG  
GTCAAATACGACCCGACCCATGGCTGGATCATAGATGAAGCTACTGGAGAAGGCTCGCGAC  
AAATTCCTTTATCCGAAGTTAAGGGTCGTATTTACTTGGCCAACCTGGATACCCAGACCACTC  
ACTGAGGAAGAATGTGAACGTTTCGTAACATTCTATAAGAACTGCCGCTATGACTACGCGGC  
ATATATCTGGACTACAGCAAACCGATTATCAAGGGGATTTATACCCCGCATTATGGACAATC  
GGCAGATGTGCTGGGAACGCAATGCTGATTTTAATGGGTTCTTTGGTTATCCATGGTGCCAG  
CCGAATGAGATGCCGTACATGCCTTTGTTTGCTTGAGATACATTCAGCAATATAACACTCTC  
CCCTTAGAAATCAATACTAAAGATGTAAACTTTTTGGGAGGACGGCCATGACTAAAGAGGA  
AACCAATCAGCTAAACAGATTATCATCTCAAGTAGCGGTATGGCCGAGACCATGTCCCGGG  
TAGAAAAATACATGGATGAGGGTAACAAGCGGCAGGAAATAGCTATCAAAGAGGCACAAG  
AGACCGCTGACCGGGCGTGTGAAAAAGCTATCAAGGTGCAGACCCAGGTATCAACGCTTGG  
CTGGGTGCGTGGCATAATTGCGACTCTACTAGCGGCCGCTATGGGATGGCTTATTAATGAA  
ACCACTTGTTATGACCGCCGAGGAAGCTTTCAGTATCCTACACAACTCCATGTAAAAACCA  
TTATGATTGACGATGAACTCCTGTACTATCTACCGAGGAAGACTGGCTGCCATACTTAAA  
GAGGCATCGGCTAATCTTCCCCAGTACCAGCCAGACCGATTTGATTGTGACAATTTTTCTATA  
GCCGTTATTGCACACATATCAGAAAAGTACCGGCTAAACAGTTGTGGTATGGCCAGAGGAG  
AAAGCCCGCAAGGATATCACGCATGGAACGTTATCTTGACTGAGCATGGCCCTAAGTTTTTT  
GAGCCTCAGACCTGCACACTATTTGAATTC AACGGGGGCGGATATTCGCGCCGACATGGTTTA  
CTTCGGGTAAACATTGCTAGGGTAATTACAATCTTTGAATTCTCTGCATAAACGGCAAATCT  
ATTTACATACCTCTCATCGGCCTCTTTCCATAGATCATAATCATATGTAGAATAACCCATCCCGT  
TTTGATAGTTTAGGCCATGGAATAACCAAACTAAAATAGCTTCCTCTTTTGCAACATGGAA  
TGCTGGTAATAAGTCACCATCCCCTGCGATTACAACAACGTGGGTAATTTGGCGTTTCCCAC  
TGATTAGTGCAAAGTCTAAACCAAGCTGTAAATCTACCTTCTTCTGAACAAATATCGGTTTCC  
CTTTATCATCATTACCCCGATATGCTAATCTTCCTTCGCGAACTGAAAACCGAGGAAGTTTAC  
CTATGTTGTTAAAGAAAGATTGTTTTTTGCTAAACCGCGATGCTTCTCAGGTGTTGGCGGAT  
TGCCCTGGTAAGGAAGACAATGGTAATAAAATGTGCGAAGTAACTCTATATTGTCCTGTGCG

CTTAAGGAGATTATCTTCCGGATTTCTTCGCTAAGTTTTGTGTAATCAATATGTATATGGAAC  
TCATGCTCAGCAATTTTGTCTAGGTATCCGCCGTCAATAAAAATCGCTAATCTTGGCATTATA  
TCCCCCTTAAAAGAACAGGCCAGACACCAAAGTGTCTGGCCCATCCGTTACATTATCTCTT  
GCCATCCCTTACAGAACGTCAAGAACCATTAACACTAATATTATATAGCACAGGGTGTTC  
GTTGTCAACACCCTTATCAACATTGCCAACATATATATGCATTATACCTCGTCAAATGTCTAC  
ATATCAGTACCGGTATTA AAAAAGCCCCCATCATGGGGGCTGCTTTTTTATTGTTAACTTCC  
GTAACTTATTGACATATGGTACTGAATATGGTACTATATGAATGTAAGGAGTAAATGAAAT  
GACCGCCAGCGATAAGAGAGAACAGAAGATACGCCAGAACCCAAATAATGTTTCACTTGAA  
GATTTTGAATGGCTGGTCACCAAATACGGGACTATTA AAAATGGGCGGGTCTCATGCTAAGGC  
ACAGATTGGGAAGTACTCCCTGCCTTATCCAAGAACAACCCAATTCGTA CTTGCTATGTAA  
AGGATTTAATAAATAAAAATAGACAGCCTAAGGTA ACTGGTTGTCTGGAGGTGTATATGGAA  
ACAGCATTAAAGAAATTAGACTACTACATGGAGTTACCCTATACAGTTGTCATTGAGCCTGA  
CGAAGATAATGACGGCGGA ACTTACTATGTTGCCAGAGCCTTAGAATTGACAGGTTGCATAG  
GTGATGGAGATACTCCGGAAGAAGCCCTTGAAAGCTTGGCTATTCATAAAAAAATGTGGCTT  
GAAGACCAGATAGAACGAGGGTATAAAAATTCCTGAACCACAACAGAAGTTCAGCGGTAAGT  
TCAATGTCCGGGTTGGCCCGGAACTCCACCGGAAACTGTCCAGAGGGCGTCTATGCACGAT  
ATGAGCTTAAATCAGTTTGTACGGAAAACTGGCGGAGGCTGTTCGGTTGA

>KBTCE2-2

ATGATACAATTTCTCTGCATATGAACGAAATTACACCTGAAATCATTGAAAATGTCTGCAT  
GGAAAAAGGCGCTAACTCCGGGCTTACCAAAGTAACCCTGCCTGACCGTACCCTGGAAATTT  
TCGGGGGTATTCGGGGAGAAACGGCAGATATCCGCCTTTTTTACCATAAAGCCGGGCGCGGC  
TATGCTCAGGTAATAAAAAGTGCATAAACCCTCTGCCGAAAGGGTCACTCCTGCCTGCCGTA  
TTTTGGTGATTGTACCGGCTGCACCTTCCAGCATATAAGCTATCCCCACCAGCTGAACTAA  
AGCACCAGATTATCTTGGCCGAATTTGAAAAAGCAGGGCTGGGCGGCACTTATATCTCAGAG  
GTAATACCCTCAGCAGCCGAATATGGCTACCGCAATCATGCCCGTTTTTCCATATATCACGC  
CAAGCTGGGTTTTGTAAACCGGTTTTTACGCCGCCATATACAGGTAGACCACTGCCGTATAA  
TGA ACTCCGGCATAAATAAAGTGTGGCCGAACTGCAAGATAAATGCGGAGAGACCCGCCA  
GCTTTCCATCCGCCACGCAAGCAATAAAAACAGCTATCTTATCCAGCCTAAACTGACAAAAG  
CCGATATAAGCATTGAAAGCGGGCAGAAAGAGTACCATGACCTGCTGCTGGGGCATGATTT  
TTGCATATCTGCCGCTTCGTTTTTTCAGGTAAACAACCCCCAGGCCGAAAAAATGGCCGGAC  
TCATAAAAAAACACCTGAACCTTAGCGGCGGGGAAACGCTGGTAGATGCCTATGCCGGAGT  
GGGTACATTTGCAGTCCTGCTCAGCCCTGACTGCAAAAAGGGTAATAGCCATTGAGGAATCTG  
CCGCCGCCATCAAGGATGCCCGCCTGAATATTGCGGGCATAGATAATATTGAACTTATCCAG  
TCTAAAACAGAGGACGTTATCAGCCAGTTTCAGGGGCAGATGGACGCACTTATACTTGACCC  
GTCACGCAGCGGAGCCACCCGTCTGTCTTAGCCAGCATATGCCAAAACCCGCCCCCGTAATC  
TGGTATATGTGGCTTGTGACCCGTCTTCACTGGCCAGAGACCTCAAAAATACTGCTTGGCGGC  
CCGTTTGA ACTTTACAGGTAATACCGGTGGATATGTTCCCCCAGACTTACCATGTTGAGAC  
GGTAGTATTGATGTCAAGGGTAGATAAGTGAGTGTGTGAAAAGCCAGTAAATAAGGGCAT  
TTCGAGGTTTGAGAGCAAAAATTTGATGTATGAAAATCGTGAAAATATCGCTTCGCGGGAAT  
AAGTCCAAAGGCATGATTTTGAACGTGACAGAGCGATTTAGATGTCAGTGTTTGGCGAGTGG  
TCAGTTTAGATAACATGTGTTTACGAGTGGTCGATTTAGATGTTTTTTCGGATTTTCCGGGTT  
GTGTGGTCAGGTTGGATACACAAGTCAATCTCGATATTTTATATTAATAAATGGAGGTTTTT  
GAATATGGATTTTGATAACGGATGCTGTTGCGGATGCAATACAGCAGATAAAGAACTGGCT  
AAGGTAAATAAGTGCCCTGTCTGTGGTAACGAAGGAATATCTGTCAGCAAGATAACGGTTG  
AACATTTAGTGGCAGGCGACTACCGAAAAACCATTGAAGGAGATGGCTATCGGATCTGTAT  
GAATGAGGACTGCAATGTTGTGTATTACAATACCAATAGTGGAGTAAAATTCTCGAAAGACC

AGGTCAGTGTTCCTGTTTGGTTTAAAAAAGATGCAAATCCTAAGTATGCATGTTATTGCAGC  
AAAGTAACGGAAGAGCAAGTAATTGAAGCGGTAGTAAAACATGGTGCGAAAACAGTACAA  
GAAGTAAATGCTATAACCGGAGCAATGAAAACTCTAATTGTAAGGAAAACAATCCGTTGG  
GAGTTTGTGCCATAAGATTATTCAGGAAGCTATTGATAAAGGCTTAAACATGAAATAATTC  
AAATTGATATGTTCTCTTCAGCCTCCGTTTTTCGGAAGATAGCTAAAACAACATAGATATATT  
CCTCAAAATGTAAGGTTAAAAAATAGCAAGGCATCCTACGTCTAATTCGTAGAAATGCCTTG  
CTTGTTTTATCGTTATCCTTCTACATCCACCGTCACAACAGACTTGAATTCCACGGTGAATTT  
GTCCTCGTAAACGATGACCTTTTTCAATCAACCGCCGGATGAGTGCTTCGTGCTATTCAATCA  
GAGCGGTGGGCTGTCCCTTTAGGAAATCGCCCATATCATCAATGCGCTTTTTAAGTTCGTCCC  
GCCAATGATATCGAGCTGTACTTTTTGTTTTTCGTACGCGAGGCGATAAATCTCATCGCCCA  
CTTTATCATATTCAGCCTTTGAGTTAGCCAACTTACAAGCTCGGTTTGAAGCTCCTCAAGCC  
GCTTGTCTATGTCAGCCAGGGTTGTGTGCTTTTCATGGATTAAGACATTTTCGATGTTGCTCC  
TTAGGATAGACAGGAAGGAGTCCCTGTGCGCAGAGTGCCTGATTAATGGCGGTTACCAGTACC  
TGCTCAATGGTGCTTTCAGTACCGTTCGAGCATCGCAGAATTGGCCGGTGTTCCTCAACCTG  
CTGATGCAGCGCCAAACGATCGACTTTTTCCCTCGGTTGTTCCAATGAATCCTGCGGAAAAA  
TTCGCCGCAGCCTCCACAAATAATCATATTTGAAAAGCTGTGTGTACTGCTGAAGGTCCTGT  
TTTTCCCATTCGGGCTGGTGTGTACGATGCGGCGGCGGATGAGTTCCTCCTGTACCTGCATGA  
AAAATTCACGCGGGATGATGGCCTCATGGCTGTTTTCCACATAATACTGAGGAACAAGGCCA  
TGGTTCCTTACTCGTGTCTTTGTGAGGAAGTCAGTGGTATATGTTTTCTGCAAGAGAGCATCA  
CCAATATAATTTTCGTTCTCAAATCTGGTTGATGTTACTGGTGTGCCACTTTTCTCTTCCAG  
CGCCATTCAGAATACCGTCAGACTCAAGACCACGGGCGATTTTCAGCATACTGGCACCCCTCG  
AGGTATTCCCGGTAGATACGTTTTACGACCTCGGCTTCTTCTGGAACAATGATTAGTTTCTTT  
TTTTCAATCTTGCTATAACCGAGGAACCGTGCACAGTTTATTTGGATTCGCCCTGTTGGTAA  
CGGTATTGCAGACCCAGCTTCACATTCTGGCTCAGAGACTGGCTCTCCTGCTGGGCGAGGGA  
CGCCATGATGGTGAGCATGATCTCACCTTGGAAATCCATGCTATCAATGTTTTCTTCTCAA  
ATATAACCGGAATGTTTTATCTTTGAGCTTTCTGATATAGTGCAGGCAATCCACTGTATTTCT  
TGCGAATCGGCTTATCGATTTAGTGATCACCTTGTGATGTTGCCCCGCATGCAGTCATCAAT  
CATGCGGTTGAATTCCTCACGCTTTTTCGTGTGGTGCCTGAGATGCCGTCATCTGCATAGAT  
TCCAGCTAACTCCAGTCTGGGTGGCTGTTTATGTATGCAGTATAGTGAGTGATTTGCGCCTC  
ATAGCTGGTTTCTGTTTCGTGCTATCGGTGAAACGCGGCAGTAAGCAGCCACACGGAGTT  
TCGGGTTTTCTTCATCCCTCTTTGCAAACCGGCTTGTTTTCTTGGCGGAAGTAGTGTAACAG  
TCATTTTTCTTCCACTTTTATTCCTCGCTTCTATCAGACTGTAAGCATATTCGGCCTGCTGG  
AACGGGTGCTCAAACCGCTTAGTCCCTTCGATGATGCGGAATGTAGAGGGATAGACGACCTC  
TCTTTTTACTTCTGGTTCGCGGATTCGGCCGAGTTTTTCTGCCCGCCTGATACGCTCCTCTTCG  
GCAGCCTCAAAGTATCGGAGTCGATAATCGCCGGATAATACTCATCACCGAGATAGTATTT  
GTTACGGAGCATCCTACCGATTCCCGCATGGAAGCCTTAATATCAGCCTTCTTTCGCGCCAT  
CGCTAACGAATCGCCGGTCAGATAGGACTGAAATAATGTTTTTATCTGCACGGCGGCTTGTT  
CATCAATAATGGCTTTTCCGTTTCCAATCCGGTAGCCGTATGGGGTATGGCCATCTATCTCA  
CCAGCCTTTCTTTTAGCGTAATGCCGCATTTAATTCGACCCCGATTTCCGTTTCGGGAATATA  
CAAGTATCCGATCTACAAAGCGTGTAACAGTTCACCGTCAAAGTCATTCAACATTTCTGAC  
TTTGTAGCGTATTGTAAGAGCTCGCTGACTTCATGCAGATTTATATTGTCGCTGTTTATGAAG  
CGAGATATGGATTCCTTCTGACGCTGTATGCGCTCGGCATCCTGCAGAAGTTCATTATTCCCC  
TTATTA AAAACGGCAGGCTCAAGGTAGCCTTTAGTCATAAGGCCAGTAAGTACCTTTTCGCTG  
TTCCGCGTTTTCTTCGAGCTTTTTATCGAGGTATGTAGCCTCGCCACGCTATCTTCGGAGTT  
GATACCGCGAAGTCCCATCAGCAGGGGTCTTAAAACGGCTTGATGACCGAAGATGAGTTTGT  
TCATCATGGTTACAAACGCATATTCAAAATCAGGTTCCGGAATGTATTTACGGGAACATTC  
TCGGTATCTTCTATATGATTGGTACAACACCAGGCGATAGTGTGCCTGCCGGTGGAGTGTAT

GCGGCGCTTGAGCTTACCGCCGCACTGACCGCAGATGATTTTACCCGAAAATGGGTAACGGT  
TCTGATACTTTTTATTCTGCTTTTCCAATCCTTTTTCCTTACCGCGCTGTTCTATGATTGACTG  
CGCCGCTTCAAATCTTCATGGTTGATAATCGCGTCATGATGGTTTTTAATCAGGTAAGTGGTC  
TTTTTACCGTAATTGTAATGGCGGTTGAAGTGCGTATCGGTGTAGGTCTTCTGAAAAATGG  
CGTCGCCAGTATATTTTTATTACCGACCATCCCTCGAATAGTTGTGCGCCGTCCATCGACCGC  
CTTTCTTGATGGAACGCCCGGCAATTCAGTTCCTCGCAATTTTGCCAGTGCCTTACCCG  
ATAAAATTTTCGAGAAAGACTAAACGAACAATGTATGCCTGCACTTCATTACGATTAACCTT  
CCGTCAACGGTATCGTATCCATAGGGTGGATAGGAAATCTTGAAGGTTCCGTTTTGGAACCT  
GCGCTTTACCGACCATTTACTGTTTTCCGCAATGGAGACCGACTCGCTTTCAGCCAGTCCACT  
TAGGATTGACAGCATGAGTTCGCTTTCCATTGAGCCTGTGTTTATGTTTTCTTCTCGAAATA  
GATAAAGATGCCGAGGCCAAGCAGCTTTCTGACCAGTTCAGACAGTCAGTTGTGTTTCTTG  
CAAACCGGCTGATCGACTTCGTTACAATGAAGTCGATTTTCTTGTCTCACAGTCGGTAATCA  
TGCGAAGCAGCTCCAGCCGCTTTTCTTTTTTCGTGCCTGTGATGCCTTCGTCATAATAAAGCC  
CGGCAAACTCCCATTCAGGATTTGATTTGATATAGGAGTCGTAATGCTTAATCTGTGTGTCG  
AGACTGACAAGTTGATCGTCACTATCGGTGGACACACGGCAGTAAGCTGCAACCCGCGAGCTT  
TGGACGCTCTGTAATAATCAGTCGATTTTTCAGCGATTTTTCGTTATCTTTTTCAACTTTTACCT  
CCTTGTGTCAGTGTGACATATTACCTCTAAAGTTCAGTAATATCAACGGTTTTTCAGGCATAATCT  
GTGCAAGTGCAGGAGAGAAAAGATTGGCGGTTAATGCGGTTATCTTGTAAATTCGACAAG  
GAAATAAGTCCGTTTTGAAGCATAGAGTCAAGTATCCGCTGCGCTCTTACATAATCCACTTC  
ACGCTGCAATTGCTCCTGCGGAACAGGCTTTTTTTTCATCTAAGGTGCAATGTACAAGCTGTTG  
TTTTTGTGTGTTTCATATAAGGTTGCCTCCGTTTTCAAAGGGAAAAAGAAAAACCCCTCACCA  
TCCACAGGACAGCGAGGGGTCAGTTGGCAACCGAAACGTGCGATTTATTCGATTTTGTGTA  
GGCGTCAGGAAAGCCAGCCGCTTGACTTTAGCAAGCATAGCATCTGCATTTGCCTTGACGG  
AGAATGCTCCAACCTGAACACGATAAAGCTTCTTTGGCTGGGTAGGCGTTTCGGGTTTAGGA  
GGTTCGCTTGTGTAAGCAGTTTCTTAACCTCAGCACGAAAAGAATCCATGCACCTGCCGTG  
TTTCGGGAACCAAGTGCATGACATCGCCATGGTTGCTGGCAATCCCCAGCTTGTAGCCTTCG  
TGTGGCAGATGATGTTCTTCTCCGTCAGTCCGTAAGTACAGAGATATACGCAAAGCTCC  
ACGGCTTCGGAATAGACTTTATTGAAATAGGTCCGATCGATCAGCCCGTCCCTCGCAGATTC  
AAAGCCGATATGTGTATCGTTCGCGATACCACCGCGTGCCATCCGCGATGGTTCCAAGGCA  
GTGTCTGATATGTTGCGATACTACCGTCAGCCAGTTTGGCGATGAAGCCGTGAACGCAGACC  
TGCCGCCATCCGGCTTACCTTGATTCCAGTGGTTGTTGTATTGGTTCTTGCCGAGTAAGCCG  
TCGTCCGGTCCGACATAGCGTTTCAGGTTGGGGTTATTCCGCCCTGTGGAATGAACCATAAT  
GCCTTTTGGTGTATGGTTTTGCCCGCCTTATAACAGGCATTGTTTGTGAATATCAGTTTACG  
TAGATTCATTTCTGCTCATCCTTTCCGTGAAGTTGTGCCAACACGTCTTTCAGCTTTTCAGGC  
ACGGGTAACCCAATAGCCGTGGCATTTCCTCAATAGCGATACGCCCTCATTGGCGATGTAATA  
GAAGATAACTGCTGTTCCGAGCGGCGCGCCTGTGCCATTGATTAGATAAGCGTCGATAAGAT  
GACCGATACCTACTACGAGAAAAATAGCTACCTTCTTGGTAATAACCATGTGCTCCGATTCGG  
CTGGATAGCTTCTTCTCAACAATTGCACGAAGTACCCCTGTGATGTAGTCCACGACCACAAA  
GGCAATTAGTGCATAGAGAAAACCGTCAAGCCCGCCAAATACCCACCGAGTAGTGCACCC  
AGCCCTGCGAACGCAGTTTGCCTCCAATTCCAATTTCTTTCATGTTGAATTTCTCCCTTAA  
AAAATAGTCACGCCGTTTTCAGATTGGACTTCTCGGATGCTTTGCCGATCAAATCTGAAAGACG  
CGTTTTGCCTTTCCGTCCGCGCTGTCCACGGTGAACGCTGTATAGAAACCACCCCTGCCGA  
AATTGTGCGTCACATCCGTGACCGTACCGATGGTTTTCGGTTTTTGCACCGCTGACAATGCGC  
ACCTCGTCTCCGATGGTGAGCTGGGGCGTGAAGATGCCGACGAAGCTCTCCTGCCTGCCGGA  
TATGGCAATGGTCTGTGCCAACTCCTCAGCCATAGCCGTTATCTCAGCAAGCGTCCGACCAT  
CGGCGGCTGTGACGTAGGTTGTTCCGGTGTGACGGCTGAATCCACCATTTGCTTCTGGGAACT  
GTTGCATAAACCGTGTTTTCCGGGTTGGCGCAGGTAACGCAAACCCCTGCTGACCGCTTCCGA

ATCGTCGTATTCCACACTGTAGCTCCAGCAAGACTTGTACGCTCGAAGGTATACACAGCAG  
GCTGGTCGAAACGGGGCGTCAGTAACAGCCGCCACACCGATGACGCCATTTGCTGTTTCATCA  
ACCTTCCAGCCATCAATCAGAGATATGATCCGCTTGATGCCGTCCAGAATGGTGACATCCGG  
TTCAAAGCGCAGCTTCCATGCCTTGGTGTTGTTGCCGACAAAAAACCTCCACCTCGGCGA  
GGCGAAGAATTTCTGCAAGTTCAGCTGAAGAGTTGTTTCTTCAAAGGTGTTGTCTCGTTA  
AAGGTCTGTTCTTCAGCAGCTTGCCGATTGCGTTTCTGGCGGATACCGATACTTTCTCGTCT  
GGGTACGAGACCGAAGCACTGTCGATATAGAAAATGCCGAGCATAAATTTCTTCGCTGTCACC  
GAGGGAAAAGTACAATTCATCTTGGTGCCGGGCGTCACGAAAGCACGGTAACGATTAAGT  
AACCGCCTTTTATGTTGAGCAAGGTGCAAGACATCTGCGAGACCCCACTACCGATGCTGAA  
CTTGACTGACCCGTCGACAAAGGAATTTGTAATGTCGGTTCGGCAGCATATACATCACAAAAC  
GGTGGTCGCCCTCGGCACTCCAGAATCCATATGCGCCGTAATGTGCCACTTTTTTGATGCTCG  
GATACGACACCGTTTCATCAGGTGATATTCTGCCGGTTTCCGTATAGGTCAGACTGTCATATA  
AACCGAGAACCGGGTCCGCCTTACTTCCGGCCACGGTGCCATCTGCGGAAAGATATATGAA  
ACGGAGCAGGTTATCCGAGGTGTGAATCACCTGTGGATAACAAGCCTGCTCCGGCATCAAGG  
GTATATTCAAATGTCAATGTCATCGCATCACCCCGTTGCAGCTGAACCGAATAGGTGAAGC  
GTAGCAGATTGTTTCGAGGTCTTAAACGGGTATTCAAGCGCAAAGCTGGCTGTGATCGATGCA  
CCTGCCGCAGGTGGTGTGTAAGTCTTACTCCCGACACGGTCTTACCCAAAAAGAAGGTTGA  
GCCGAAACTCTGGCCGTCCTCGTCGGGAAGCTCTGGTAATATAGATTGTAAGTCCAGTTAT  
AGCTGACACTGCCCGATACGGTTAAGGTCTTACCTGTTTTGTTCTGCATTACCTGCGGCGT  
CAACAGTGGATGTCGGTATAGCGGTTAAACCGGTGCAAGTATCATTTGCGATACTGATGTTG  
AGCGTAGAGTCATTGTCCGCCCGCTTTTCGCAGTCAGTCGAACATATCTGCCGTTATCCGC  
GCTTATTGTGAAGAAGTCGTAATGTCGGAATTGAGCGCGAGTGCGGCGTTTACCTTTGCTG  
CAACGGTTGTCGACGAGTCTCCGCTTGTAAACCGGCACCGAAAGGGTTATAGGCGAGTTCGCC  
ATTCGGCAGCCGTTACCACAACCGTCGCGTTTCCCGCAGTTCCGATAGTTCCGGTCCACATA  
GATATTTTCTGTTGCTTTACAGCGGCTACTCCAGCAGTCGTATTGGTTCGAGGTTGAAACTGT  
GGTCAGCCCAGCGCAAGTACCATTTGACAGGGCGATATTCAGGCTTGAAACATTTGCTATCG  
GCGTTTTTCGCTGTCAAAATTACATCCACACCTGAAACTGACGCATCATATACAGCTGAAATA  
TTCGCATTGTTTTCAAGGGCTGTTTTGATCTTGCCCGCCACAATACTCGCCGTATCTGATGAG  
GCTACTGGCACGGAGAGAGTGATCGGCGAGCCAGTCATGCCGCTTGATGTTACAACAACGG  
TGGCATTGCCTTACCCTTAAAAATGTCCTCCAGTACCTTGCTGATACTTCTGTGAATTTCC  
AAACCTGACCTGCCCTTGAAAGCCCTGATACATCCGTCCAGTCTGTGTCGTTAACTGAATAC  
TGTATTTTGAGAAGATCGAGCCTTGGCGTTCGGAATCGTCAGAATATCAATTTTCAGTGTATT  
ACAAGGCTTTGCAGTCCCAAAGTCTATTTTAATGGGGCTTACATCGTTTACCGTGCAGGAGG  
ATGGATATACCGTCGTGTCATAGCAGCTCCACCATGCAAGAGGGTCTCGATAGGAATAGTTG  
CTGCTTGGCGTTTTTGTGCGCAAGGTCACCGAAGGATACTCCGGTGCTTTTGCAGGTTAGACCT  
GCTGTATGGTAGTTTTTCATACCAGTCACCGCAGTTGTTATCCAAATCCACAGTATAGTCGGTA  
CCTTCAGTCATTTTCAGTGTGCTTTATAAAAATACGGACGGTCCCCGACTGAATCAGTGGGCA  
CTTCATACTAAACTCAGTGGTAACGCCGTACCCTCACCGATAACGAGGTGGTCAACCGGAT  
AGGGTGGGAAAATATCATGGTTCGGGAATGTAAATGCGCCGACCCCGGCGACGCCGAGATG  
CTTGACGATACGGTTGTTACATTCGCTGTCAAGAAACGTAGTGACGGGCAGGTCGTATTGGT  
AGGTGGTGGTATTCCCGGTGCCACCGCTGAAGGAATAACTCTTACTACCTTGATATTTAACG  
CTCATATCCGATGAATAATCTACTGGGAAGCGCGAGAAACGTACAGTTCCGTCCGTACTGCC  
TGTGAGCAACCATTGGAACAGATAATTGTTTTCTGCCGTGGGATATATGCCGTTTGTCCAA  
AACCGGAAGGGGTGCAGGTAGCGTAGAAAGTTGCGGTTATATACACCACATCCGTATCAGT  
CTTTGCTATGGCGATCTGGTTTCTTCGGAATCCTGCAGCATGGCGTGGGACATGATGTAGT  
AATTGGTTGAAAAGGTGCCGCTGTAATACCCTTCAAGCGCCACCTCGGTAATGGTGGAGCCG  
TTACTACTCGGTCGCTTCCAGCTTGATTTGCTTGGTTCGTGTGCGACGTCGGATATTCATATACC

GTCTCCAGCGTCGTCACGGCTTTGCGCGTCAGATGTGTAAAAAGGTCGGTATCCGTAAGTGC  
AGGTGTTCCCGTGCCGTGTGCCGACCGCGATATATCTGAACAGGTCGGTTGTTTTACTAAGCG  
GAGAAGCGGTCAGCCTACTGTTAAAATAGTAGTTTGTAAACATTGAAGCCGACCGCCGTC  
TGCTTTGTTTTGCCGCTTACGGCATCGACCACCTTGACGTCAAACGGTTATGCAGAACGGC  
TCGTTCTTGTATTTTCATATTGAAAACCTCCTAAATCGGTAATGTGGAAACAGGCTGCAGGCT  
TATAGACGAAGCCACAACAGCAATGATCGCCGTATGAGCAGGCTGGAAACACTGGGTGAAC  
ACCGCCTCGTCAATCCATGCCCCAGTTGAAACTATCGAAATGCCTGCCGTTTCGTTTTCCAAA  
GGTGAAGTAGTCCATAGTTTCTGCGGGCGGCGACAGCACTCAGAGTGGGCAGGAACCATCTTT  
GCAAACCAAGTTTGTAAATACCAGAGAGAACGGTATTCCGGCATTGTAATGGTTACCGTACC  
GTCCTGCGGATATCGGGCGCTCGTATACAAAACAAGCGCTTGCTCTTCGCTGTCATAGGAAGC  
GGATGTAAGTGTCAACCCCTGAAACGGAAAGGGTGCATTTTATCGGGAACCCTGAGTCGATAC  
TTCCGTATAGAGGATTTGTAAGATGAAGCTTGAAGCCGTAGCAGACGAAATCCGTCTCGCG  
TTCAGCTTCTCCACCGAAGCTACGGAGATTTCTACTGTGTCCGGCTCATCCAGCAGAACATA  
GGGATAGGCAGTATTCCCAGATGCGTACTCTTTGTTCAAGTGTGTCCAGCTCATTATATCGGA  
AATCCACATTTTACGTTTGCAGCGTTGATGTGAACTGTTTCCGGTCGGACGCTCATTCCGGC  
ATAGTTGCGGTGCGTCAGTGTTAGAAGCATTTCGACCGTTGTTCTGCGTCAGGAATCCGATGC  
GGAAATCGTTGGTGCGGATAACCGATAGTGTGCGTGTGCCCGTACCAAGCGTGGCTACTTCA  
TGCTCCGCTTCCCAGACATAAGATCCGTTTTCTGACAGCAGAGCGCCCGTAATACACTGA  
TCCACTTTTTAGATAACCGATGACCAATCCTTGGTCAATGTCCGGTTCGACACTGGACTGCCA  
GCCCTTGCAGGCGGATATCTGGGAAACACCGGTGGCAATCAGAGAGGCATTATCGCTATTCC  
TCCAGCTTTGAACATACAGATTGCCGTTCCGAACATAAAAAGATATACGGATAATCCTCGGTT  
TGTAAGTAATACCACTCCTTTTTCGGAGTTCATTTTCCACACGCCGTTAAATTCAATCGCCACA  
TCAGTCGCAGCACCGAGTGTCCACTGATACTCCCACGGAAACTCCATGCCCGCCGGAAACTT  
CCGTTTATACACCTTGGCGACACCGTCGTCCAAACAGATGGCATAAGCAAGAGACAAATCG  
GATTCACCAGCGGTCTGGCGCACAGCCACATCGCCGAACGCGGGAGCAATGTCTTCGTGAAT  
CGGCTCGGAGAGCAGCGAATTGACGGAGGTCTGCGTGGCTACTACGCGGAGATTTGCCATA  
CTTTTGGTGTTTTCCACCTTGAAGCGGTTAGCGAGTTTTTCTTTCAGCGCTGTCCGGTATGCTTC  
TCATGGGTGCGCTCACCTCGCTTACCGCCGCAAGTGTGGCTGTGACCATATACCAGCCCGCCG  
CCTGATAATCAAAGGAGCCGAGTTCACAAATTCTTCCAGTGAAAACGCCCTGTTTTACAGAG  
CATTCAAGGAGCGGAACGCTGTCTCGGATGACATCAGCGCGGCTTTCCCAGCTTCATTAAC  
ATAGAGCGTCAGTTCATAATGCACAGTCGGCGAACCGAAACGGGTGAGATACTCCGTCCCGT  
CAAGGGCGGTCTGAACCGTGCGGATGACCGCTGCGTTTTTTCGGAAGCTGACAAAGTGCGTA  
ATGATTTCACTTGTCTCTGCATTTTTTTCAGATAACTCATACGCGCACCTCCTGTCTGAGTCGGT  
CAATGATAATATCTACGACCGAGGTCATTTACCAGCGGAATTGACGCCTTCCACCCGAATA  
ACACCCGTATGCTCCACGGTTTTTTTTACGTCGAAGCGAGGTGTCATTCATCACTTTATGGATG  
CCGGTATTCATATCAAGGTCAAAGTCCGGTGGGGATCGCGCCTGTAATGTTTTTTTCAACACC  
CTTCATAGCGTTGGTGAAGCCCTACCGATACCAAGCCCCATATTTTACCAATACCGGCAA  
ACACCTTTGAGGGCGAGTTGATACCCAGCAAGCTTTTTTGCACCGTCAACAATGCCGGAAAAA  
AAGTCGAAACCTTATCAGCTATCCAAGAGCCGAGGGACTTGATGCCTTCCCATAGACCAGT  
CACGATATTCTTACCTATTTCAAACACAGAACCGACCGCTTTCCCAAGACCGGTTACGATTG  
CTATGATGATTTCCGGCAGTTTTTGCACAAGCTGCGGTATGGCTTTAATAAGGCCAACCGCA  
AGCTGTATGGTGAGTTCGATGCCCATTTCAATGATTTTCAGGCAAATTATCCGTTATGAAATTG  
ATAATGGTTGTTATGATTTCCGGGCAGTGATCTATCAGTTTTCGGCAGTGCAATTAAGAAGTCC  
GGTAGCCAAGCCTTGAATAATTGCAAATGCAGCCGCAAGGATTTTATCCATATTAGCAAGCA  
GGGTGTCCACGATAAGGATGATGGCTTCGACGATGGAAGGAATCAGTTCGGCAGAGCAAC  
ACCTAAACCTTCTGCAAGAGCAGTCACCAACTGTATCGCCGCTTCGACAAGGAGCGGCAAG  
CTGTCCACCAAAGCGTTGATGATGGTCATCACCGCTTCGACCGCCCGCGGTATAAGTTCGGG



CAGGAGTTTTAGTAGGGTGTTCAGCACCTGTGTGAACAGTTCTGTTACCGTCTGTAGTAGCA  
TAGGCAACAAGTCGCTATCGCCTGCAAAATTGCATCAGCCGCCGCAGGCAGAGCCGCGAC  
GATATTTTGAAGACAGGCACGATGTTTTTACCACCGATTGAAATGCGTCCACGAGGTTCT  
GTGTCAGGTTGGTCATATCGGCATTAGCGTTTCCAAGCCCCGCCGTAATGAACCGAGGGCG  
GCTTGTAACAAACCGACGGAGCCGGAGATTGTTTTCGTGGATTCTCTTGCGAAATTGCCTGC  
GACTGTTCGGTGTTTTCAAAAAACATCTGCATGGCGACCTCAGCTTTTTTCGGCTTGAGTCGC  
ACTTGCCCAAGTAAAGTCCAGCCCTTTTTCGAGAGCATAGGCTTCGATGTTGGTTGCGTTCA  
TGGCAACACCAAGGTTATCCATCATCGTGAAATTGCCCTTTGCTGCACCCGTAACAGCCTCC  
ATTGCCATTGACATATCGATGCCATGACAGATGCCATGTCTGCCGCTCGCTGCATTGCTTTT  
TCGGTCAGTTCAAGGGACTTTTTGTTGCTCGAGCCCTGAGCCTTGAAAAGCGCACCCATCTT  
GTTTGTGTGGCGAGGTAGTCGCTCTGGCTTACGCCGAGATTCTTATAGGCTTCCTCGCCAGT  
CTTTTGGATTCTCGTAGCGTACTCGCCGAATACGGCTTCTGAACCTCCGAGGTTCTGTTCCAA  
TTCTCCAAACTGCTGCACGACTTCTTTGCCGAGTTTTATGGCTGCGGCTCCTGCCGCCACAGC  
CACCGCACCCATAGACGCGCCTATACCTTTGAGGATGCCGCCAGTTTCTCAAACCTACCGC  
CGGATTTTTCCGCTTCATTTGCGGTGTCTTTCAATTCGTCTCCGAGGTCGTGCGTGGCTTCAG  
CGGAGTCATTAAGTTCCCGCTCCATTCCGTTGAGTTCAGCCTTGGCGTTGTTAAGCTGGATAG  
CCCAGTTCTGCGTCTCTTGTGCTTTTACCGAAACTCTCGGCGGCGTTCTTAAGTGCGGATT  
CAAGGGCAGAGATTTTATCCTTCTGTGCTTCGATGGCTTTATTCAGCACTTCATGCCGAGCAG  
CAACCGCTTGATTGATTTGTCGTTTTATCAAATTCGGAGGAGACCAGTTTCATCTCACTGC  
CAAGCACCTTAAAGGACTGGTTGATGTCGCGCAGAGCGTTCTTGAATCTTTCTCGCCCTCCA  
GGCCTATCTTCAACCCGAAATTATCAGCCATTTGCGCGTCACCACCTTTCCTAAATTAGTTCT  
GACGGAATAATTTCTTCAATAAACATCTCGCGCTTGGGCTTCGCCAAGCCGAGGTAAGTGCCT  
GTGGCATTCCACAAATCCATTAAGAGACCGATGGGAGTGAGCCACGTTTCTCTCGGCAC  
GGTTCAGGTGAACCGTGCCATAATAGAGAAGTCGGGTAAACAACCTCATCGTCGCTTACCCGA  
CCTCCGCGTTTTTTGGGTCTGTCTCGCTTTTCGATGTTGCGAGCCGTGCCTTTGAACATCGCCT  
CGGTAATTGCCGCTTGTAGGTCGCCAACTCCAAAGGTGAGGTCAGCAGTTCAACTTCCTCC  
TCCGTGAGCGGCTCCTGTGGTTTTGTCCTTGTGCTTTAAGTTGTGAATGAGGATTGACTGATTG  
GAAAGTAGTGTAATCAGCCATATAATCTCATCAAGGGCAAGTTCGAAGTTTTCTGCTTTAAG  
CAGTTTTTCGCCAAATTCTCAAGCCCGCCGTAGCGACGGGCGATTTCTTGGTGGCGCGGG  
TGGTGAGGATCAACTCATACTCCGAGCCGCCGATATTGATTTTTGCGCTTCTCTCGTTATCCA  
TAATCCATTAACCTCCTTGCCTTGCGAATGTCGGTTCGTAGACGGCGGTATAACCAACTGCTG  
ATGACGGTTGACTCGATGTCGCTGTCATCTTCGTGACCTCCGCTTTCCAAGGGTGAAGGTTG  
GCGTTGCCGTTGCAGTTTTGTTACGGCGTAGTACCATGCCTTCGATGGTCGGCGTAGAAAA  
TGTGATACTGTCGCTTTGGTGGCAAGGTTGGTGGAAAGGCACTCCGAATTTACGCGGTAGA  
GCCAAAAGTAGCGATAGTGACCGTTGCTTTTCTTGGCACGGAATCCAATTGCCACAGGTGAG  
CCGCCATCCTCGGAAGCTGAAATTAGCACTCCGTTCTCATCAACGATCGAGCCTGTAAGTGC  
CGCAGCGACACTTCTACCGATAGTGTCCACGCCGAGGGTCAGCTTGCCGTTTTTGAATTCTTT  
GACCACCTCGGCGGCGCCGTCATCCGCATAGAGCGTGGCTTCCGCCAGCTCCACCGACAAC  
CCGCAGATATTGCCTTTGCAAGCATTACGGGAGTGCCGTAGGTTTCATAGCCCGTGGTCTGG  
GCTTCGGTTATCGGCGCGTAATAGAGCCGGTCAAGTCCGATTGTAGCCATATTGTTTATTCTT  
CCGTTTTCGTATTCTTTACCACATCGATGGCGAAGTGGTGGTAGCCGCTGTGCTCCTCATGTC  
CGATGTAGCGGCGGTTCGGTTATGGTAAAGCCTGCACCCAAAAGTGCTGTCGTGATTTGCCGC  
TTTTTCTGCTGATAGTTGTCCTTGAAAAGAGGGAAATCCTCACTTCGGATATATCTATAAGT  
GGCTTGTGTCCCGAATAGGGCAAATATGTCTGTCATCGGGGTCAGCACGAGGTAAGTACTC  
GGGCGGTACGCCGCTGAAAACGCCCGTCTCCATAGGGAGGACGGGCGTAAGTAAGGTAATTT  
AGTTCAGACAGTATGCTCATAACGCCGTCCACCTCCGATTCAAACCTTCGTTTTATCGCTTCGA  
TCGCTGCGTTCTTGTACCGACTTGGCGGGCTTCAAAAATGGCTTCGGCGTCTGACCGTGCC

GACCGTATTCAATGATGTTAGCTATTTTAGCGTTGCTACCGCCGTCGCTCCTCGGTTCTTTGA  
AGCCGACCTTGATGTCCCAGCCGGAGCCGTCTCGCTTTTGCTTGGCGGGAGAAAGTCCGAGG  
GAGCGTTCCAACCTCGCCCGTAGAGCGGCTTACTTCTTTTGTGACGCGCCCCACCACTGAGGA  
GAGGTTGCTTTTTACTTTAGCAAGCACCACTTCGCCACCCGCTTCGAGTACCTTCGGGATAAT  
CTCGTCAGTCTTGTGCGGCAAGGCGGGAGAGCCGTTCTCAAATCAGTAGGAAGTTTTAGTT  
CAACCTTTGCCATCACATCACGCTCCCTTCGAGTTTCTCGCAAAGGCACTCGATATACATCCT  
ACGGTCTCTGACATCTTCAGCTGAAATAATGCGGTATCTACCTGTATTGCTGGTGTATGATGA  
GTGTGCGTGTCAACGGTAAGACCGGGTATTTTGCGAAAACGAAACATAACAGTAACTTCGGA  
AAACGCCGCCATATTCGCCAACGCTCCGAACCGTGTTTTTCTCTTTATAGGCACGGACGG  
AAGCAAGAACGGTGTGCGCTTTTTTGCACAAAGCCCTCGGCATCCTTGATCGGGGTAGTAGTG  
ACAATGTTTATAAACGTGTTCATTTTCCCGAATGCCATAAGTCGGACACCTCCAAAAAAT  
TTCCTAAAACATATAGACAACCTGATTTTCAGATATGTTATTATACATAAGTAAAATAACTTAA  
CACAAAAGGAGTGTCCATTATGTTAGCTACCTACAAGGATTTCACTACTCAAACCCAAACT  
GTCGTAAGTTCGAAAACGACGACGATATGCAGAATGTTTTTGGTTTTCTCTCGCAGGACTTC  
ATCATCGTTCAGATGATAGACGCGAGCGAAGCTGGCAAACCTGCTCTTGACCTGTTGCTGT  
CAATGTCGAGCATTTTTTCGCCGACCCAAACAAGTCGCATGATAATTCTCTGGACGACAACT  
TCACCAAGCAAGCAGTGGGGCTGATGATTAAGACCATACTTGAGCCTTTCGGGTACACAGTG  
TGAAACAGAAAGACTTACCTAAAAGCATCAACGCAACTAAGTTTCAGTCTGCCTCAACATA  
CCGTTTTGACGTTCTTGCTCCAAGGAGCATGAAAATCGTCAAGCGAGTTGAAAAAATCATCT  
CCTAAACGCCCATGACCGGTCAAGCCGTAACAGTGTGTTGACAGTGTCCAGACCTGCTGA  
CTCGCCTGAATGGAATCTGCAAAGAAGCCGCTGTCGAGCCGTCGCGAGACTCGTACCAGTT  
GGATACGAGCATAATCACCGCTTGCTTGGTAGTAGGTGGCATATCGTTCCCGCCGTAGTAGC  
CCGAAGCAATGTGCTGATAGCTTTCGGCATAGTTTACGGCGGGCGGCGATGAGCCGCAGGAG  
CAAAGCATCGTCTTGGTCATGGGTTAGGATAAGGTTATCCTTGACCAGTGGTAACAGTTCCG  
TTGGCGTCATCGCCACTCACCTCCTTATTCGGGCTCAGTTTCGGTTTTCCATCAGCCCTGCTGT  
TTTAAGCGATGCGAGAATTGCGTTAATCACAGTGTACTCCGGCAACGTCCTCAGCCACAC  
TGTCAGCCACCGCTTCGGCGACGGGAACAGTGGGGACGGTAACTTCCGGGACAAATAGAAA  
GCCGTCTCGTCAACCGCCACGGGTACGGCTTCATCTGTCTTTCGAGGAGCTTTAATACCGCC  
GAGCGTGGCTTCGGTCGCCACTTGGAGCGGGTCAGAGGAAAGCCCTGTGACAGTGGCGGTC  
GGCAGGACTTCCAAAGTCCCGCCGATTACCCATTTTTACCCTTGCTCTTGGTAGTTCTTT  
GTGTTGTAAGTGTTATCAGCCATAAGTCACGTCCTCCTTTAAGAACCCATCTTGAGAAGCTG  
AATGCCCTCAGACAGGATAACCTTGCCGTCCACGCGCTCGGTGGCGATAAAGCCAACCTGAC  
CGTTTCCGGCATAGAGTTCGTTTCAGGCGCTGAACCGTTCTGCCATACGGTCGGCAATCCAG  
TAGTTGCTGAAATCACCGAAGGCAATAGGCAGAGAGGCAGCCGTTGCCGCAGGAACATAGG  
GGCTGGTGTAAATGGGGTAGCCGAGCAATCTGTCAGGCAGCCAGCCTGAACCGACGGCTG  
CCATACATACACGCCGTTGCCGTCCTTCAGCTTGCAGGAGTGCAGGAAATCGTCACGTCCTGCA  
TGAGGAACGCAGCGTTCCTGCGGTACGGAGACTTCAAGGAGTAGATCAGATCGATGAGATT  
GTCTACTGTAATTGCTGTGGCAGAACCTGCCGTACACCCGACATGACCGCCGTTTGCAGTGA  
AAATACCTGTGGGTTGACCCGTTCCGGTGCCGACACAGAATGCCTGCTCCTCGGCAACTCCG  
AATGCCCTCGCAAACCTCTGCGGCGATGTAGGACTCCAAGTCAAACATCGAGTCCTGCAGGA  
GTTCAAGACTGACTTTCACAAGGTCGGTCAGTTTCAAAGCGTCGATGGTCTTCTGGTCAAG  
GTCGGGTTGCTCTCGGTGTAGGAGCCATTCTCCGCTGTCCACTGGGCGGTGCTGTGCGTTGCC  
GCGACAGGGATTTTACGCTCTGCCGAGGTTGTGATTGTCTTGGCAATGGAGCGGATGATGTT  
TGCTTCTTCAAAGGCGGTCACAAGCTGACGCTCAAATTCAGCGGCACAAGATAGCCCCGT  
CGGTATCGGGCGAGGTGCTAAGGACATTATTGATGGGCTGCTTACCACGCAGGATTTTGCCA  
AAGTCCGCCTTGTACTCGTCGGAAGCCCTGCCAATTTAGCTTCAGTAGGTTTGGTGGTGA  
ATTGGCGATAGGACTCGTGGTCGGCTTCGCCATTTAGGTCATACGCCTGCTGACGTTCCA

ACCTCTCGATTTCTTGGCCGAGGGAAACCATATCGGCTTCCATTTTGTCTACTCGGCTGCGG  
CTTCAAGTGGCACCATGCCATCAGTGCCGCGTTTCTGGTCGAGGAACTCCTTAGCGGTGTT  
CAAATTTTGTGCGCTTCTCGCGCAGTTCAAGGATTGTACTCATTGTATTACCTCCATTAAT  
TTAGTGGATAATCAAATTGAGCCGCTTCTCAGCGACTCAGCGTCCACGCCTTTCGGCGTTTC  
AGGTTCAAGTTTTCGGGTCTTGCAGCGGAGCTTTCGGCATTACCTTGCCAAGTAGGGAGTTGG  
TGACCGCTCGCCTTGAGAAGGAGAATGTCACATCCTCCGAGGTTTTGCGTTTTGCGTCTCTA  
AAATGCCGTCGGCAAACCAAGTTCAATCGCCTTGTTAGCGTTCATCCAAGTCTCCGCGTCC  
ATCAAGTGACTGATTTTTGCCCTTACTGACTCGTCTTGATTTGGTAGGCGTTGACGATGGAT  
TCTTTGACCTCGGCGAGCATATCGATGGCTTTCGCGATTTCTCGCTGTGCGCCGATGGCGATT  
GTCAGCGGGTTATGAATCATCATCAGGGCGGTGGGAGCCATAAGCACCTTTGTTCCCGCCAT  
TGCGATGACGCTTGCCGCCAAGCCGCAATGCCGTCAATTTTGACCGTCACGCTATGGGGGT  
AGTCCATCAGCATGGCGTAGATTTGGCTTGGCGGACGCGAGTCGCGCCCGGCGAGTTGAGC  
CAAATGGTGATGTCGCCTATGTCCTTAAACAACCTCGTCGCGGAACATCTTAGGCGTCACTT  
GTCGCCCCACCAAGTCTCCTCCGAGATTTCCCCGTCGAAGTAGAGGACGCGCTCACCGGCGG  
TCTCGTCGCGCGCCAGTCCCAAATTTCTTTAGCTTACTTTTCACGATGTGTCCTCTTTTTCG  
TTTGTTTTATAGGCCGCACCCACGTCGGCGAGTTTGACCATATTGCCGTTTAAAGACGTGGATG  
TTGCCGCCCTCAGAATCGGGCAGAAGGTTCAAGTCTTCCAAACCCCGCACGTCGTTGACGCT  
GTAAGCCGTTTTGAATGCCACGCTGTAGCCTTGATACGGCTCTGATAATCGCCGCGCA  
TTAAGCCATCCAAGTTGAACCTGACGAATACCGCCGCCTTTTCGGAAGGCAGGATGAGGGCT  
TGCTGTAAACTCTGCTCCACCTGACCACCAAGGATCGAGGGTGTATTTACAAACTCCAA  
GGATTGCTGCTCGATGTTGGAAAAGCTGCTCTTTTCAAGGTCGCCCACCATGTGGGGCGGCA  
CTCGGAAGATACGGGCGATTTCTGTTTATCTGAAACTTCCGTGTCTCTAAAAATTGTGCCTGTT  
CGGGCGGTATGCTCATTGTTGTTGAAACTTCAAGCCTTCTTCAAGCACAGCCACTTTGTGAGCA  
TTCGCACCGCCAAACTGCGTCGACCAGCTTTCACGAAGCCTGTCAGCTTGCTCCGGCTTAAT  
CACGCCGGGGTGTTCATAACACCGCCGGGGTTTGCGCCATTGGCGAAAAATGTGGCTCCGT  
AGTCTCTGTGGCAAGAGCAAGACCGACAGCATTCTTTGCCATCGCAATCGGCGAATAACCT  
ATAAGCCCGTCGAAGCCCAAGCCGGGGATATGAAGGACGCTCTCTTTTCGCAGCTTGACCTG  
ACCTTTGTCGCTTTGGTAGGTGTAGATCAGTTCGCCTTGCGGATTGCGGTCTACGCTCATTG  
GTCGGGCAACATTGGGTAGAGCGCCACAGGGTAGCCACGTCCATCACGGATAATCTGTGCG  
TAGGCGTTGCCCCACAGAAGCAGGTGTGCCATAAGCGTTTCCCTGAACACGAAAGAAGTCA  
TCTCGCGGTTTGGCTCGTCGTGGAGCAGACGGTAGAGCGGATGCATACTCGTGCGCTCTTTA  
CCGCCGTTGTCTGTATAGCGGTAAACGTGGAGCGGCAAGACCGCAATTGATTGCGACAGGA  
TACGCACACAGGCATATACTGCCGATGTTTGCATCGCTGTCCGCTCGTTCACAGCCTTGCCGC  
TTGTGGTGCCGCCAAATAGAAACGACCACCCACCGCCACGGAGTTCTGAGGTTTATCGCGG  
CTGTGTGGTGCCCATAGTCTTGAAAATATACTCATATAAAACAACAGCCCCCTTTCATCGTAG  
ACTGAGCCTTGAGGGATAACCGCCGCCGATGGTCGCTCTGGCAAAGCCATAATCATTGCCAC  
AACACCATCGATTTTCTCGGTGGACTTCTTTTTGTTGGGCTTGATGTTGCCCGCTGCGTCTTG  
GTCGATGATGACATTCCCATATTCCAATCAAGGACAGGATGCCGACCGTGCGGATTTTAC  
CCTCCATCACGAACTGGTAGAAGTCTTGCTCGGTGGCGACATACTTACAAAACCCTGCCCG  
AAGGGGACTACTTCAAAGGCGTGTTCGCGCCGAGTTCCTCAAGGTCACGACGTATCTTCTC  
TGCACCGTATCGGTCATAGGCAATCTCCCGTATCTTGAACGCTCGGACAACCTTGCCGATGA  
ACGCCACGATGTAGTCGTAATCCACAACATTGCCCTTCGGTGGTATTAACACGTCATCTTCT  
TCCACACCTCGTATGGGACATGGTCACGGCGGGTGCGAAGGTCGATAACTTCTCCGGCAAC  
CAGTAGAATGGCATCACCGTGTATTTGGCATACCCGACATTGGCGGGAACACCAATACCAG  
AGCCGTCAGGTCGCCTGTGGAGGATAGGTCAAGTCCGCAATAGCAGTCGCGCCCTCGTAGT  
TATCCCATTCGATTTCTCACCGAGGGCGTCCCATTTATCCATAGGCATCCAACGGATGTCGG  
CGTTGCACCACTCGTTTAAAGCGAAACTGCCGAAAGTGCATCTCCTCGGCGGGGTTTTGCTTT

GCCTGTTTCGTAGGCGGCTTGCACAGTTTCATATGGAATGGTCACTCCAATGCTCGGATTGAC  
ACGCTCCAACTTTATCGTCTTCCAGTCATCGCCATCCTCGATGCCGAAGACGGCGGGGT  
AAAAGGACGGGTCAACTTTAGAGCCGTCCATCACGGCTTTCGCTTTGCAGTGAATCTCATAG  
CAAATGCTCGTCTTGTCTCTGCCC GCCGTGGTGATAAGAAAAGTAGAGTGGCTGCCGTCTGGC  
ATCGCCTGTGTA CTTGGTCA TCGTGTCAAAAAGTTCTCTGGTCTGCTGAGCAAACA ACTCATC  
GAAAATAAGCCCAGAGACATTGAAACCCTGCTTGGACTTGGTCTCGCTGGACAGCACACGA  
TAAAAGCTGTTTGTGTGTGGAAATGTAATCCGCTTGTGGACGGTAGCAGTTTTGATATCGC  
GGCGATGTCTTTGCATTGCTCAACCATCGCCTTGGCGGTATTGAAAACAATACTCGCCTGATT  
GATATCGGCGGCACAGGAATAAACCTCGGCTCCGGCTTCAACGTCGGCGAACAGAAGGTAG  
AGGGCTATGGCCGCCGCAAGCTCGGATTTACCATTTTTCTTACCAACTTCGACATATGCCGTA  
CGAAACTGCCTGTATCCGTCCTCGCCGACGATACCGAAGATGTCACGGATAATCTGCTCCTG  
CCACGGCATGAGGTGAAACGGTTTTGCCGTACCATTCAACGGTGGTATGGCGGAGCATTGTA  
TGAAGCCCACCGCAAAGTCGGCTCGCCGCTTGT CATAGCGACTGGTGGGCAGCATGAGCTTT  
GTCGGTGTGTATTTAAAACCGCCATCGGCGTAACTCCCTTCGTGGTAATAAAAAAGACCT  
CCGTCCGGAAGCCCTGTGTTATCTATCTGTACGAGAGACAGCCCCTTGTGCGGGGTGTCCTCG  
CTTGTATACGAGTTTAGTTGTA CTTTGGAGGATGATGGCGTTCCCCTTAAAGTTCTATGATA  
TCTGAATCGCCAGTTCGCCCGTGAGTATCAGCACTCCATATGCTTTGGTGTGTTGTCATCATG  
AAGTCCGCTAATTCTCCGCAGCCATCTCGAGGGCAATTTTGAGAACCGCGTTGACATCAA  
CATATTACTTCTACCTGTCGAGGCCACTTTACGGCATTGTTCTTTAATGACCTCAGCTTTAGA  
AAGAATTCTGATTT CATCTTCGCCGTAAACCGTCCGAGAGTAGAGCCGTTGTCCAATCAG  
CAAAAACCGTGCCGGTGTGCTCCACAAAGATAACCGTACCTCGGTGCCCCGGCTTAAGCGTC  
GTGTAGGGGTGCGACATAGAAACCAGTTCAACCCTTGCACCTTTGGCATACTTGAGCGCCG  
TGCTTCTACGACGGCCTTATTTGGGAAACTGTTATTCTTGCCCATCAGTCTGACCTCCGTTTC  
TGCGGCTCGCCTGCATAGCGGCGTAGCTTGC GTTGTAGGAAATGAAGCGTTCCCCGAAAGG  
TTACGGCATAGCCATTTCTTGTGCTCCGAACTCGGCACCGCTCATTCCAAGCCGCACCAA  
GAAAGTGCGCAGGGCGAATTTCTCGCTTTCGACATCACGCTCTGTCGCCATGACCCTGCTGT  
GTTTCTTGACGTGCTTGACAAAGGAAGCAGACAGTTGACTATAAATAATTCCTACTCCCGTG  
TCCTCGGAATAGGGATATATGAATTGAATGTTTTCGCCTGTGTCGTTGACCTTGAGCGGTCTG  
CCGAGTGCCTTAGTAAGCAATGTTCTGTTTGC TTTTCGACCAGTCGTTTAATGTTATCCACCTGA  
GCATCGGTCAAGCCGTTTTTCGGAAGTCCACCGCAAAGCCGTCGTAGACTTCGTTTTTGG  
GAGCAACTCGGCAATGTCCACCCACGCACGAAGTCATAATTCTCGTTCGAGTTGCCTGAGTT  
CGAGCAGAACCACATCGCCCTCGCAGAAGTCCATCGAAAACCGCCAAGCCTCCAAGTCGGT  
GGAAGCCGAGAAGACCTCCATGCGGTCAGGACAGTCGGGGTCGCTGAGTTCCGCTTGGTAA  
GTGTAGCTTTTCGGGAACATCGCTTGTG CATTCCGTCCTCGCCGTTGAGGTGCTGGCGTTCT  
TTCCCAAGCCCAAGTTCCTCACGTTCCGTGAGGTTCAAGTCTTCAAATGCCGGGGCTTCGTTG  
GTTTCGGTGGTCATCTCGTCATATTCCTCGCTGGCCGCCGTAAAACCGTGCAGCCCACAAAG  
GTCTGCGATCAGCCCGCTGTTGTCTCGCCCGTAACCAAACCGTTCCTTGTGATGTGGTAACC  
GCCGACCTCATAGGCGAAGGTGCGGGCTCCGAGATACTTTGTGCGGAGCGTTCAGTTCTTTGC  
TGATTGCTGCTACTAAGGATTTTCGTTCTGCGCCTGTTACGTTGTAAGAAAGCTTCATTCTCT  
TTTCTCCGTTTTCTT GATTTGTGCGAGGGTGAACCTGTGGCAGGCTTTGTTGTCCCCGCGC  
ATTACATATATCACTCTAAACGCCTTGAATAGCAAGCATTTAGGGACAAATAAATGTACCGA  
ATATCAAGGGAAAACAGACTTTTATCCTTGTGTGTATGACACAATCCACCGAGAACGAATA  
CCACGCACGGCAAAGCGACTCCATTGCCCCACATTTTATACTCGGCGGCATCGGAGTGCGGG  
TCTTTAAGCCACTTTATAATCTGGTTTCGGCTCTTGGGTTTGGTGGATGTACCTATAATAATA  
CGGTGAGTTTCCCAAACCTCCGACCAAAGGAGATGTCATCCTCGGTTGGATCAATTGTTCC  
AAGCCCCGCACACCAATCAGGCGGGAATCCTTGGAGCAAGGCGCACTCAGTCGGAGTGAGC  
CTGCGAACAACGTAGCGGTTCTCGACGATTACACTTTCAGAACCGCCACCGTTCGTGCCACC

CGTAGATTTTCAGCGTTCAGCCGTGTTGCTTTCACGGTAGCCGCTATGTTGATAATTCTCGAC  
CGTCACTCGCTCCACAACCGCTTTCCTTCATCAATCTGCTGTTGCTGTGGGAATTTATAATC  
GGAAGCGCAGAGGGAGCCGACCTTGTCTTGGTAACACACCGCGTGGCGGTCAGCCTCCGTA  
AGGGTAAAGCTGACATCTTTGCCGATGCCGCTCCCTTGGGGACCGTTTTTATCCGCGCGCCC  
AATCATGGAACCTTGAACAGATACCACCGCCATGCCGCTGCATTTTTGTTTTGGGTCAGGAA  
CGGAGGTGTCGAGTGTCTTGC GGTTTCGGCTTCGTATATCCCGCTGTGCGGGTTTTGCCGATT  
TCATTGAATTGGATGCTTGGGAGCAGATGCCGTAAGCCTTCGGCACGAACACGGTCTGGTGC  
TTGCCGTCGACAGTGTGGCCGAAAGGTTATTTTGCACAAGGGCACCTTTGCCGCCGCCTTC  
GCAACCAGAGCGGATTTTTAGGGTTTTTCGGTTCGAATACACACTGTGTTCCCTTGAAGTCTGT  
GCCGGTGAGGGTGTTCGCCACGTCTCACCAACCGTCAAGGCGTACTGCCTTTTCGTTCATGA  
CGAGGGGGACATTGCCGCCGCCTGTCCCATACGCTCTGTGAGGGTTTGCACCGTTCCGCTG  
TCGTCAATCTTTATCCTTGAATCGGCAGGATGGTTTTCTATTGCTACTGCCAGTTGGTTATCG  
CCCATATCGGCACGGAGCGCGCCGGTGGGTTTCATCTTGCCAACAATGACCGCCGACCTTGA  
AGCCGCACCCGGCTCGAACACGATGGGTTGATGCCCATGTTCCCTGCGAGCGAAGTGTCCCCG  
TTACATTTTTCGGAAACGTCCATGTACGAGCCGCCTTGGTCAATTAAGATGCAGACTGTGCTTC  
CAGAGCCAACCGCAATACTTTTCGGCAGTTGTTTGCACGGGAAGCCGCCCTGCGGAGGATGC  
CCTCGCAGGCGCGACTCGTCAAATAGTATTTTTTCGGCACGTTTCGCCTGTAAAATCGACGAC  
AATGTAACAACGGCGGCGTCTCTGGGCGACTCCCCAAAATTGAGCGTCAAGCGTTCGCCAGC  
TGACGGAGAAACCGTCTCCACGATTTACCTGACGTAGACCATTTGCCCTTTTCAGGCAA  
GGTACTGACAGGGTTTTATCTTTAATTTGAATGAGTTCATTGAGTACCTCCTGAAAATCAGCA  
CCGCCCGCCGAACGTACATAACCCGGCACGTTCTCCAGAACGGCAAACCTTCGGATAGGTGTT  
ATCGGTAGCGGTAAGCATCTCTTTAATGATTCGCGGTATCTGATAAAATAGCCCCGACCTCT  
CGCCTTGAAGCCCGGCGCGTTTTCCCCGCCACGGACAAATCCTGACAGCAAAAACCCGCCGTG  
ATGATGTCAACAGGAGGGAGAAGAGCACCGTTTATTTTTATTGATGTCTCCGTAGTGCTTCAT  
ATTTGGGAATCGTTTTTGTGGTGACCCAAATCGGAAAGGGTTCAACTTCTGAAGCCCAAAGCG  
GCTTGATGCTCGTTAAAAAGGCTCCGAGCGGAAAACCGCCGGAGCCATCAAAGAGCGAACC  
AAGTGTGAGTTTTTTTTCCACGGTTCGGCCACCTCCTTACCAAACCGGCATAGGGGAGGGTC  
TTGCCCTTACGCTCGCAGGTGATATCCTCACCGTTTTTGCCTTTAAATTCAGCATAGCGACGA  
AGAATGACAGATGCATATTTTTTCATCCAACCTCGAGCATATTGCAGATTCTATCCGCTTGATCG  
CAGGCGATCAGTGTGCTCCCTGAACCGCCGAAGGTGTCCAGCACGATGCCGTTTGCCTGACT  
GCTGTTGCGTATCGGGTATGCAAGCAGGTGAGGGGCTTGCTGGTCGGGTGGTCGCCGCCCC  
GCTTGGGTTTTGGCGAAGTTCATATTGTAGCTTCAGCTCTCCCTGCGTACCATTTATGTGACC  
CCGTTTTTCAGCCAGCCGTAGAGGATTGGCTCGTGCTGCCATTGGTATGGGGAGCGACCCATG  
ACAAAACCTGTCCTTGACCCAGATGCAAGTACCACTCAGATGGAAACCCGTTTTCGCGAAAAG  
CCCTGCGGAAGTTCTCGCCCTCGGTGTCGGCATGGAAGATATATGCCGAGCCACCGTTTTCG  
AGGTTTTTCAGCAAGGTTACGGAAAGATGATAGCAGGAAGCTATAGAACTGATCCGTTTTCAT  
GCTATCGTTCTTAATTTTCAGCCCACTTGTGATTGCAAGCCGACGTTGTATGGCGGGTCAGT  
CAGAACAAGTTTTGCCTTGCCTCCGTCCATCAGTCTTTTACCAGTATCGGCATTTGTAGCATC  
GCCGCAGATAAGGCGGTGCCGACCGAGCGTCCATATATACCCGGGCAAAAACAAAAGCCGCC  
TGTTCAAGGGCGGCTGTGAGGTTGAAATCGTCATCTTGCACCTTCGCCGTCGGAGTCCGCGAA  
CAGTTTTCAATCTCGGCGGTGTCAAACCCGTAATCTCCAGGTGCAAGCCGAGTCTTTTA  
GGTCGGCGAATTCCAGCGCTAAGAGTTCCTCGTCCCATCCAGCGCTGAGTGCCAGACGGTTG  
TCGGCAAGGATGTAGGCTTTTTTCTGCGCTTCGGTTCAGATGTTCTACAAACACGCACGGAAT  
TTCGGTCAAACCTTCTTCTTTTGGCCGATAATGCGTCCGTGTCCTGCGATGATGCTCAGGTC  
TTTGTCAACGATGACTGGGTTGACGAAACCGAACTCACGGAGAGAAGAGCGGAGTTGCAAA  
ATCTGCTCCTTGCTGTGGGTACGCGCATTTCGTGCATACGGCACAAGCCGGTCTATATTAAC  
TTTTCAAATCGTTCTGTAGTCTGCATTTATTAACCCCTGTTTGTGAGTAATTCCAAAAG

CGGTTCTTTTCTTCGCCCCCTGTGCCGCTGTGCCGGTTGATGATTTGCATAATAAGGTTGAAG  
TCTCCCTGCATTGCTTTGTAGTAAGCTGAACCCGCCGTCACATAGGGTGACAGCTTCAGGTCT  
TTGGTCATGCGTCCAATTTTACGGTTCATCGCTTCGCAGGCGAGAAATCCCTGCCTATTTAGC  
ACATAGTCCGATATTGTCTGCGGCGCGACATAGCCGTCACAGCCACGGGATGCGATGTATTC  
CTCGATTTTCATTTTCGCAGCACGTTCGGCCGACGGCACTTCTTTTTTCACATTCCTTCATCGCCAT  
TGAGAAGTAGTCCGCCATCACGTTTTTGGAAAGTTACCTTTTTTGGTTTGGGCTGACCCATACT  
GTTTGTGCTGATGGGCTTACCTTCGAGTTTTTATCACTTGTATTTTTCCGAGGACGACCTGC  
CCCCGGACGATACCCTCCGCTGGGCATGAGCGTCACCTCGCTTTGATTTTGATTTCCGTTTTG  
ATTTTTTTGATTTTTGATTATTGAGAAATTCACACGGCAGGCCGAGCGCGCTGCCCGTCCTAA  
AGGCTGTAGAGATGCTGACCGCCCTCGGTCAACGACACTCTTAAAAGTAATCGCCTTTCTG  
CGAGTGCAAACGGCTGTGGCACTCGGAACAGAGAGCTTGAAGATTCGCCAGTCGTTTCGTG  
CCGCCATCGGTTCAGCTTCCGCCTATGGTGGACGAGCGTTGCAGAAACGAGCCGTCCTTGTCC  
CTTGCACACCTCGCATAGAGGGTTTTGTAGAAAGGAACGCCGCTCTAATCCTGTTCCAACCTCC  
TGCCGTAGCGTTTATTGGCTTCGGGGTCCCGAACAAATTTGGTTGTATCGCTTTGCCTCAGCCT  
TGGCGTGTTCCTCACAGTACCGACTTGTGGTCAGCTTGGGACAGCCGGGGTGCAGCAAGGC  
TTCTTTGCTTTGTAGGGCATTGTTTTTCCCTCCGTTCTCAGGGTATAGAAAAAGGACGCCCCG  
TGTGGGAACGCCCTCATTGTTTCGCCATCATAACAATATCATATGAGCCGCGTGGCTTTCTAT  
GGTTTTAAGTGGCGAATCGCGTCAACCTCGTTCAAACCCCTGTTGTGAAGCCGATGTACCCA  
CCGTATGTCAAGGTGCAGTTCACCGAAATCTCCTCCCAAGTTTTGAAGCACAGATACTCA  
GTTCCAATATAGTTTGAAGGTTCGGGTGCTTCCACACACTTTATAATGGTGACGATTTCTGTCT  
TTAGGTCTACAAGGGCATTAAAGGTTCGGTGTATTATTTCCGACTCCAAATCCATCATCTTCA  
TCACATCTTCCATACGGTGGATGTTGCGTGTCTCCTTGCTGGGCGGCACGTCAGACAGGGTG  
GCGACGGCTTTGGTGGAGAGGTCTCGTAGCGACTGCACCTGCTCCAGTTTGGAGTTGATGCG  
ACGGTCAATGTGATAGGCTTGGGAGAGGTACTCCTTTGCCGTCAGTTCTTGCCTGTTTCATAG  
ACTTGCCCTCCGATACAATGTGGTTTCCCTCGGATTGGCAACTTTTACTCCGTTGATTGTCA  
CAGATTTGCTTTGACCGCATCGATTAAGGCGGTCTGTGTCCTATCCTTTTCGGATAGGGCTTT  
TATAACACGCTCGTCGATGGTGTCTTTGGCGGTGATATGATGGATGACCACCGTTTCGGACT  
GCTGACCCTGACGCCACAGGCGCGCATTGGTCTGTTGGTAGAGTTCCAAACTCCATGTCATC  
CCGAACCATATAAATTGTGTTGCCGCCACTTTGCAGGTTTAGCCCGTGTCCCGCCGAAGCGGG  
GTGGATTAGGGCGACAGGCAACTCACCGGATTCCATCGGGCGATTGATTCCGACGTATCCA  
TCTTGAAAACGGAATGTGGCGGGATTTACGCCTTAAAGGCAATCCGCTCCAAGTCGTGCTTG  
AACCAGTAGGCTACCATCACGGGTTTGCCGTTGGCGGCTTCGATTAAATCCTCCAAAGCATC  
AAGTTTGCGGTCATGGATGTGGTGATAACTACCGCCGTCACCATAAACCGCTCCGTTTGCCA  
TTTGGCACAGCTTATTGGAAAGAGCGGCGGCATTGGCTGCGGTAACCTCGCCATCTGCAAGC  
TGCAGCACAAATCCCCTTCATCTCGTCATACCGTTCACGCTCATATTTCGACATCCGTACA  
GGATATTCCGGCGGTCACGAGTTTTGGCATCTTCAGGTGATCGGTGGACTTCATGCTGATTGT  
GATGTCGGCAATTTTGGCGTATATCCGCTTCTCGGCAGAAGGCTGTGGCTTATAGCTGAAAA  
TAACCTGACCGTTACGCTTGTCCGGGACAAAGTAGTTCGGTACGGTATTGTCCGATGAACCGC  
CCAAGCCGCTGACCCATATCAAGAAGCCGAAACTCAGCCCATAAGTCCATCAAGCCGTTGCT  
GCTCGGCGTTCTGTGAGTCCCACGATGCGTTTACCTTCGGGCGGGCTTTCATCAGCGACC  
GAAACCGCTTTGACTGATGGCTCTTAAAAGAAGACAACCTCATCTACCACCAAAGTGTCAAAA  
TCGAAGGGCAGTCCGCTTTCCTCAATCAGCCATTGTACATTCTCGCGGTTTATAATGTAAATG  
TCGGCTTGCTTCAAAGCGCCGATTTGCGCTCCGTTTCCGTACCGACCGCCACGGAAAAGCG  
TAGGTTCGGAGAGGTGTTCCCATTTCCGCAGTTCCTCCGGCCAAGTGTACGGGCTACACGGA  
GAGGAGCGATGACCAGTATGCGGTGTGCTTCGAAGCTGTCAAATAACAGGTTCGGAAAGGGC  
GGTCAGTGTAATCGCTGTTTTGCCAAGCCCCATGTCAAAGTAGGAGGCAGGATATAGGGTTTG  
CTTCAATGAAAGCCGTGGCATATTCCTGATAGTTATGAGGTTGATATTTACGAAGCACACC

TCCAATCTGTTCTGAATCGTCTAATACATAAACTTTGTATCCCAACCGCCGTAACATCCCATG  
CCTTGATTTCTGCAACGGTTCGGGGCTTTTCGCCTTGCCGCTTTACTTCCACAAAACCGCACTT  
TCCATCTGGAAGAAGCACAAGGCGGTCTGGCATTCCATCGAAGCCGGGGCTTATAAACTTGG  
GTGAGATAACCCCATTTGCCTTGACTGCCTCCGTGAGTTTTCGTTCCAATGTTTTCTCTCGCA  
TATAGACCTCCATTTTCCTCATTGCCCATCTTGCCGATTCTGCCTATAATTCCTACGCGGGCA  
TATTACGTATGCTCATTGCTCTTACTTATAAAAATAAGATTTAATAGAGAGAACATCGGC  
AATATGGGCAATGGCTGTGCTTAAACCGTGGTATATTCGGGGCTTGCACATTGCCGATTAA  
GGTTGCCCAAGCCCCGACAGGCAATCATGGGCAATTGCACCATAATCATTCTGACCTCACGA  
ACACACGCTGGACGCCGTACATCGGGACAGCTTTTTTGCCTGTCTTGTTCCTTCGTACTTCA  
CCCAGCCGCTATTTGGTTGAGAATGCCCTCGATCTCGTAGGAGTCGGCTTTCTTAATGGATT  
CGCGCGACTTCCCGAAGCACTCGCACCAAATCTCCATCACGCAGACCTGACTCCGACGCACT  
GTACCTTTTGCCCTTGTAGGGTCGTCTGTAGAGCGTATATATTCGATCCTGCGATAAATGTCC  
ATTGTGTCCCAGTTTTTCAGGCAGCAGCTCTTAAAGGTAATCAGCCACCAAGCCCTCGCGGTC  
ATCGTTCTCCATAGCATCTCGCTGTTCGGCAAATGCCGCTAACCGCATATCGCCTTTTAGGAA  
CAATTCCTCACCTCGGTGTACCTAACAATGGCTTCCGCCCAAATCTGGTCAGTCTCCGTAAG  
TTCCCAAGCGTGGTATTTGCCGCCGCCAGAACTCGCACAGGCCAGAAGCGGCGGTTGCCCG  
TGATGTCTCTTAAGAAACCGCCGTCTGAGTTGGTCGATCCCACAATGATGCATTGACGAGGG  
TGGCTCTCGACGGCTCTGCCGTAAGAGGGGCGGTATTTATCGTCTGTGCGGGTGATGAACGA  
CTTCACCGTCTCCACGTCCATTTCTTGATGCCCGCAAGTTCTCCAGTTCGAGTAGCCAGTA  
GCCTTGCAGCTTCTCGGGCGCAGTCTTATCTTTCATATCTGAAATTGAGAGGCTGTCTGAGTA  
CCATTGCCGACCGAGTTTTGAGAACAGGGTGGACTTCCCGATGCCCTGTTTGCCGTTTAGCA  
CAAGGATGGAGTCGTGCTTCACGCCGGGTTTAAATATGCGAGCGACCGCTGCCACGAGCGTT  
TTTCTGGTGACTGCTCTTGTGTAAGGCGAGTCTCCGCACCGAGATAGTCAATGAGCAGCGT  
GTCCATTCGGGGAATCCTGTCCCACGCAGGCAGGCTGTTCAAGTATTCTGTATCGGGTGGT  
AGGCGCGGTCATCGGAAACCTTGGTGAGAGCCAGTTCATAGTTGCGAGCCGAGAAGGTGCC  
GTAACGTTTATCCACATATGCCACAAGCTGTGCAGTGTCTGCGTCACGCCAAGGCGGGTACG  
GTCGCTCCCATGGGAGGTTCTCTCCATATACTTGGTTTGCAAGTTTGTGTTGGCGGATGCCCG  
TGAGGGCGTCATCGTTGTTCAAGATAAGGAGAAGGTTGCCGAGGGTATTGCAGAGGATACC  
ACTTTTCTCCCTTGAAGCCGCGACATCCAGTCTCCTCGCTCTCGGCAAACCTCGGTCTCGGCGGC  
GGCAATGCGTCTCTCGGCAATTAGGGTGTGACCTTCTCGTCTTTTAAAGGCTAACTCGTCTAT  
CGCCTTGAAACCCGCTTTATCATCAAGGTCTGTGAATTTGTGGACACGGACAAGATCAAAGG  
CGTTTAGCAGCTTGCCGCAGGCAGGGTCTGTGGCATGGTGTGAGAAAGCCCATTTACCTTCA  
TACAGCACAACGCCCGCACTTGAGTCGGCAGGGATATAATCATAACGTCCCGACATTGCAG  
AAGGCTCGTAAATGTCCGGCAGAAATGTTGCGATTGTGTCTCTATAGAGTAGGAACGACA  
GAACGCACCGACTACGCCTTCTTTTTCGAGCGGGTTTTGCTGCTGATGGATACTGCGTTGTAT  
CACCTCGGACTGACGGCTTGATGTCCGCCAGAGAGAGCAGTCCCGCCAGTCGGATAGCTTTG  
CGAGGTATTTGTCCGGGTTGAGTTCATCACCATCAATTACTTTGAACACATACTCCCCATCAG  
ATGGCGTGGACGGCCAGTACATCAATCGTCCGGCTCGTAGGTGGAATCATCAAAGAAATC  
CATCCCGATTTTCATCCGCCACAAGCCTTGAAAGAGCGGCGTATTTCGTCCGGCGTAACATCAC  
GGGAGAGAGGAATAACCACGCGGAGTCTTGGAGTTTTGGGCGTATGACTGTGGGTGGAGTA  
GATGGCGCAGTTGTGCGGGAACAGCATCTCTACCGTGTGATAAAGCCGCTGTCCGGCGTGGT  
CGGCATCGAGGGTAATCCCTGAACGGCTCTCGACCGTGTCTTTTTGCGCCGCCCGGACTTG  
AGGTGACCGAGGACATAGCCGCCACATCCTTGGCGGTGTCACGGCGGTCTTTGGTAAACTT  
TTGATATTCAGCGACGGTTTCTGTAGTGCGGCGGGTGACCTTGAACCGCTCGCATAACTCTTC  
AAATGTGGTCTTCTTATTAACCCATCGTTTTTGACAGACGGCTGTCCCGTAGGATATTTTCAG  
GTCTCGCATTCTTCTGTGACCTCCTCCTCAAATTTGCCCTCGCCCAATTCAGGAAATTGCCA  
CGGCAGGTTGTGTCGTACTTGTGACAGGTCTTGCCAAAAGCAGGGCAAGCACCGCAAGCCA

GCACGATGAAGTGGTGATTGGAAATGAATTCGGGCGTGAGCGATTCCCTCCACACATCAA  
ATTGGTCTTAATGGGTTCTATAGGCTTCGGGGTTGACCGTTTAGCTGCCATAGTCGGATACCT  
CCTCACATTTGCCGTTAAAAAACGGATAGGGATATTGCGTCTGCGAGCCTTGGTGATTTC  
CGGCTCATGCCCTCTGAGGGTGAGCCGAAAGCCCATAGCTCGTCGCATTTACCAAGCAGGAT  
AAGGGCGAAGCGAAGCCCAAGTTCTCTTTGTTTTGGATCATCATCATCCATAAATTGTGGGT  
AGTGCAGGTGCGGAGCAAGAGGAATACACCCCTTGCTGACCGCAAACCTGCAATAACCCCG  
TGCCTTCTCGACGTTTCGTTCCATATCTCCTGCAAAGGAGAGGCGATATATATTAGCGGGA  
GATACTGTTTTGCTTTTTCTCGCGTTCGACTGCTGTTAAAGCCTCATAAGCCGTCGGGTCAG  
GATAACCTTCACTGTTGAATTTGTTTCATCAAGCACCTCCCTTGGTAATACTGCTCCACAAGC  
GAGCGGAGCCACTCCACCTCTTCATCAAGCTGTTTATTCTCTGATTGAAGTGCGGTTATTTGC  
GTTTCTTGCTCCTCGGTTTTGTCTGCAAGAATGAACATAAGGGAAAACCAGCAGGTCACTCC  
AATCCAAATTAACACCCACGGGATTGCATCCCATATTGCCTTGCCAACCTTCTTCAGAGCCA  
CTTTGATGGCTTGCTTCTTTTCATTAGTCATTGTCGTTTACCCCTTCCCAAGAAATAAGTTGA  
TAAATACTGCTGTCCTTTGCCTGTGACCTTCGTTGTCTTGCTGATGGTTACATGACCGTCCG  
AGTGCCTGATGGCGGTCTCTTTTACTCTAAACAAACCCAGTTCATAGCCCTCTGCGTCGGA  
GCGTTGTAATCCGTGCCTTGGCGCTTGATGAGGTAACCGTCCTGACGCAGCTTCTCAAACAG  
ACGATTCTGTCCGATTTCAATGCCATTACCCTTGAGGATTTTCGCCAATTCACCGATGAGGAT  
TGTGCCATTGAAACCGAAACGGCGTCGGCAAAAATAACCTTCGGCTCGTTCTTGGCAGCTT  
CCAATTGGAGACGATCCTTTGCGGCACGCTCGTCTTTAAGGGCGGTTAGCACCTTAATCCAA  
GCGTCGGGGTCGTTTCATCATCTCCTCCAATTTGGCGGGAGTGAGATATGCACCGTGCCTGCG  
AATGGAAGGTAACACTTCATGGGTGACCCAGCGTTTTAAATCTTTTGGCGTCAGGCTTGTCTG  
AGCGGAGGATGACGTTGTAAGACCGCTCTCATTACGGCGTACATTTGCGGGGTCTGACCA  
CCTGACACGAATTTGATTCGGGTCAGCTCATCGCCGTCCAAACGCTCCGCCACCTTGTGGT  
GTCCGATAAACCAAGTACCTCGCATACATCTTTCAGCACCCAGAGCGTTTCGTCACCTTGGC  
GTACTGTCCTTACTTCGTTCCCATCATAAGAGAACAACCTTGCAGTTGATTGTCCATAAATTGCC  
TCCTGTAAAATAATTATTTTCGAGAGGCTGTAAACCCCTCACCATCCACAGGACAGCAAGGGG  
CTACTTGGCAACCAACCGCTTAATCTTTTTTATAAAATGGGCAATCATAGCCATCGGCATGG  
AGTAAAAGCCCTTCAGCCCACGGCGGTGTACGGCTCATTGTTCGCAGAGAACCTTGGTGGAA  
CATTCCGGGAATCAGCTTCAATGACCATTTTCATCATGGACGTGCATCACGATGTCGCAGCACC  
TTTGCCTGTCATTGCGTAGCTGAGGATATCGCGACTGGTGGCCTGCACGATGTTCTCCACA  
AATTTGGGTCCGTAGCTTTCAAGCCGTTCCCACTTTTTTCGTACCGCCAATGCCCTCGTAGGTC  
ACGCAATCTGAGCCAACTGATTAGAGCCTATTCGGGGTTTTACATAAGAGAGCCGCCTGCC  
CGAAGGCAGGGTTATAAAGAGCATTCCGCTCTGCACTCCGAAGCGGATACCGTGGGTTTTCGG  
TAACCGTTCTGTCCCTGACAGCCTTTATAGCTGCTTTATCAACATCCCACCAAAGCCTGACGA  
TGTTTGGGTTGGAAGCCCGCCATGCCGTGACGAGGGTTTGTAGTTCGTCCTTCCAACAAACCC  
ATCTCCAATGCGCCCATCGCTTTGAGCGCGCCGACAGAACCGCCATATCCGAGGGCAAGTTC  
TGCAATTTTACCTTTTTGTGCAAGCGGACTGCCTTTGGTGACTTCCTCAATCGGGACGTGGAA  
CATCTGGCTTGCAGGAGGCTTCGTAAATCTTGCCGTGGGTGGCAAAGACATCGTTGCGCCACC  
GCTCCCCGGCAAGCCATGCGATGACGCGGGCTTCAATAGCCGAAAAGTTCGGCTACCACAAA  
CTTCGTGTCGGGCTTCGGAATGAATGCCGTCTTATTAACCTCCGACAGTACCTCAGGCACGG  
AGTCGTAGAGCAGTTCCAAAGCGGTAATAATTGCCGCTTCGCACCAAAGTCCGCGCCTGTTCA  
AGGTCCGGGCAGATGGTTCTGCGGAAGATTTTGCAATTTGAATTAAGCGTCCAGCCCATCTGCC  
GGTGCAGTTTTGCGCCATAAACTGGAACATAACCCCTTGCCCGACCATCTGAGCAGACAGCGT  
TTTCCATCGCCTGATATTTCTTGACCGAGGACTTCGCCAACTGCTGCCTAAGCGACAACGCCT  
GACCGAGTGGCTCCGGTGTCTTCAAGAGTTCAGCGACCGCCTTTTTACCGAGGGTGTCCG  
GTTTCCAAGCCGTTATCTGCAAGCCATTGCTTCATCTGCGCCACAGAGTTCGGGTTGTCCGAGT  
TCCGTGATTTCTTTCATCATGCGGGTCAGTTCGCTTTGGATCGGGCGTCGGCGGAGATGGC



G TTCCTGACGAGTGT CATATCCACCATCACGCCGCGGTTCGTTGATTTCTTGGTTCGAGAGCGT  
ACTCGTTCCAGATGGAATCCGGCACAGGGAAATTTGCGAGCCGCTCCTGTATAGACATTTCT  
GCTTCCACATCACGGCGGTTATATTCCTTAAACGCCGCCACTTGTTCGGGAGAGTGGGCAGG  
AAGGTTACGGGTGCGTTGCCCGTTGGCGGTGGTGGCGACACACGGTTTGCAGAAATAGCGG  
ATGAGTTCTTTACCCTCGGTCAGCTTTTGTCTTTCCAATCCCAAACCGCACCCGCACCTTCA  
AGCGAGAGGGGCAATCCCATATACGCCGACCAGACCATAGAGCATCTCCATGATTCGGGAT  
TCAGGTATTTACCTTGCCTAAATGCTGAGACGAAAAGTGGTTGTTCGGTGAAGGGGTCAAGG  
CTTATGCCCATATCCGATAAGAATCGGGAAAGACAGACCCGCTCGAAGTTGGCGTTGAAAG  
CCCATTTTTGCACGGTATTATCCGTCAGGGCGTCGAGGACAACGGTTGGAATACTCTCTCCA  
TCGGTGAGAGAAATCACCTGAACCTCGCCGCCGTCCACGGAGTAGCCAAACAGGAGAATCT  
GAAAGTCCTGTGCCTCGGCGTACTTATATACACCACACTTACTGAGGTCTGCGCTGCTGTAT  
GTTTCAATATCAATACTGAGTGTTCATAAGCCCTCCATAACGCAGAAGGGCGGCAAGTTT  
CCTCACCGCCCTCGTGCCGTCTGTGTAATCTTTAGCTGAGGAAATCTTCATCGTCTTCGGTG  
GCAAAGTCGTCCTCGGCTCTGGTCTTGCCGCCGAGCGGGTCCCGTCCACGCAGTTTCTGAAT  
GTTATTCAGCCCGCAAGCGATACCTTTGTTGCCGTTGCTGTTGAAAGCGTAGAAATTCACGC  
TGGCACGAGCATAACACCCGCTGTAAATCTGCGAGCGTTCGATAATGGTCTCGCAGGTACTG  
TCCACGATGCCGGGAGCTGTGCTACTGTTGGCATTGATGAAATAGCTGTTCGGCGTAGGCTTC  
GTCGTTCGGGGCGTTCTGTGTCTCCGTCTCGTAGCGGGGTTTTGAGGACAGCGAGTGCAGGTA  
CAGTTTTGCCGTTGCCTTTAGCTTGGTTTTCGCCCTCACGGTACGCCGCTTCAATCGCCGCCT  
TAATCTTGGCGATAGTGCGGGTGTCGCTCTTGGGGATAATGATGCTGACCGAGTATTTCCGGC  
GTACCGCCGTTAATAGACTTCCGTTCCACAGATTTGCGTAAGAGAGTCTTGCTTCACCCGT  
AATAACCTTTGTAGGGTTGGGGGCGGGGCTTTGGTTTTTGCGGGTTATTGTCTGATTAGCCAT  
TGTCTTTTACCTCCATAAAATCGTTTTTGGCAGTATTGATTGCCGGACGTTTGTTCGCCCTCCG  
GCACGAGCGTTGGTTTACCTTGCGGTTTTCTCGATCAATCCGCTGAGCAGTTCCGGCGAATTTG  
GCTTTGCCGAGAGCCTTTTCCATTGCGGTGATACCCATCACTTTGTGTTCATAGGGGTCGTAA  
CCCTCCGTGACTACGGCTTTAGCAACGGCATCCTCGCTGACATACTTGCGGTTGCTCTTGCCC  
TCGACAACCTTCCAACCTTGCCACAGCTTACCGCCGAGGGCGGCTTGTAGGGCGTAATCCCT  
GATGTCGGAAGCCCAAGAGATAAGGTCATCAATCTTACCGAGGATAGATTTCGATTTATCGT  
CCTCCAACAGGGGCGGGCGTTTGAATCCAACCTTTCGAGTTCATGTTTCGCTCGGCGCGT  
TTTTCTGCACTCGTACTTCGCCTTGACAGAAATGACACCATTTCGCCACAGTTGTACTCGCCATCA  
CCCGCATAGGCAATTTCCGGCTGTGGGTTTTAGTACTTCCCTCCGCCATTGGTAGAGCGATTCC  
TTAAAACCGTGTTGGTACTGACATTGTCACGCCCTTGCTGATAGATGGTCAATTGACACCTC  
GTTGATGTCGTAATGCCGTCAAACAACCTCCAACGCCCCAAGGCATACAACCTTCATTTGCG  
GGTTGTCGATTGCCTCTACAAGTACTCCTTGCCCATGCTTGTAATCCACGATGTGGAGAGTAC  
CGTCGGCGATAATGACACAGTCGCCGGTGCCGAAGCCTTCCCTGCACATATTTGGAGAAATCA  
AGCTTCTGCTCAATAAGTACTACGGGGTCCGGCACAAGTCTGCTTTGCAGTTTCTACCAGTTCC  
AGGATGTAAGAGGGCGTAGCCTGTGGCACACTCGTCCATCTCCTCGGAGTAGCGTTGCAAGGT  
TTTCGTTCGGGTCTTTTACTTTGATGCAGAGTGTGTTTTTTCAGCCTGTACTCGCCAAGGGTATG  
GGCTTCCGTGCCTTCTGCGGCATAGTCGCTGCCCTTGTCCCTCGTATTGCTCACAAAGCCGTGC  
CGAGGGAGGACAGTTGAGCCATCTATGGCTTGACGAAGCAGAGAGGAGTGCGTGTTTACCC  
ATCTTACCCTCCCTAAGCCCGATGGTGTGCTGGCTTCCCAAGCAGGGGCTTCAAACCTTTGCAG  
GGTCAATCTCCGACAGTTTCGATGCACCGTGCTTTTGAACAGATCTCTAACATCGGCTGTAT  
GACCGCTTCGGGACTTTTTCAGCGAGTACGGCTCGCACCTGCTCAAGAGTGACGGATTTTGGC  
TTTACCTTGGATTTCGGATTGCAGTGCATTTACTTCTGACTTCGCATCGCCGTTTTTGTGCAAT  
AATGTCGCCAAACTATCCGCCACCGCCGTAAGTGACTGTGTAGCGCTTCGCAATTCACCGAT  
GCAGAGGTCGAGTTCACTCATCTTGCTCATCCGGATTTCCCTCCTTTCTCGGTTGACTCATCTC  
GCTTTTGGAGTGCGATTAGCTTCTTAGCGAGACGTTTGGACACGATGCTTATCGCCGTCAGA

ATTCCTGCGAGTTCCTCGTCAAGGTCGACATCGCGCAAGTCTGTGTCTGTGTTTTTGGCCTTT  
GTTTCCATTGGTCTACCTCCTTTTTCTGAGGGAGGTTTGTCCCTCACCATCCACAGGACAGC  
GAGGGGAGGTTTGGCAACCGAGGTTCGAAAGTTTTTATTACCCGCTATAAATGCAGCGCAGCT  
TTTCGATGACCTTTTGTTCGCTTGCCGACCGCTTGATGGGATATGCCAATTTTCGGCGGCAT  
AATCACGCTCGGTGCGGTCAAGTGTAGAAAAGGGCGTTGATGAGAGACCTCTCGTCAGGTTCT  
AAATCATCAAGGGCTGCTACAAGTTGTTTCGAGGAGCAACTTGTCTGCCACCAACTCAGCCAA  
GTCCACTGAATCAGCGACTTCGTAGCCTTCTTCGTTGAACTTGTGAGGGAAAGGTCGCCGC  
CCTCGCGGGACTTTTCGCATGTGCGGCAGTCCTTAGTGCAACGGAAGCCGTTCTCATCACGG  
CATTTTTTAGCACGTTTCTTTCGCTTGTGTTCTGCCCAAAGCGGGCGTTTGTAGGCTCTGTAG  
ACTTCTTCCGTGACGGGAATTTGCTCTCCGTTGATTTTCGATAAAGTATTGGTTTTCCATGATT  
TGCTCCTTTGTTTTTCAGAATTTCTGAAATCCGCCGGAGCCGTTGAATCCGCTATAAACAGGA  
CAAGACGGCAGGTGAACTCCTTGTAGGGAGTTCGCACTGCCGTCTTGCCTTCTGGCGGAT  
TTCGGTTATTGAGTTGCTTTGGGGTATGTGGCTACGCCGCAGGGGGTGTGTTTCGTGGGTAA  
TTCTTAGCGTTCCGTCCGGGTTGGCTGTAATACGGGTTATACAGTCTTTGATTTGGATTTCAA  
AGATGCGGTTGTCTTTGCTCACATCGCCGACACGCTTCTTGTTCAGGTTTTGACTTGGTTCA  
TGGATTTCGTCCTCCTTTCTGTTGTTATCGCAAACACATAATTGACAAACACAACTATTGTGA  
TAGAATAGCAAAGGTGTAAGTAGCGTTTCCGATGTTTGTATCGCAGTTTTGCTTTTACAGTT  
CAATTTTACAAAAGAGGCTTTCTCAACTCCGCACTAAAACGAACCGAAACGGACTAAACC  
GGACTTTTGTTCAGGCAGGGAGGTGTACAAAGTGATTTTTACTGAATTCGCACAGATGCTGT  
ATCCCTTTTGTGGAAACGGTAAATATCAATCTGACCTTGTTCGTGGCACTTGTGGGAATATCA  
TCGAAGATACAGATGACGAGATTTGCCCTTGTGACAATAAGCCCGATTATCTAACAAGG  
ATTTATAACGGGGCGAAACCCTTTCCGAGAAAAGACGCAGCTTTTGTGTTGGGGCATTTAGA  
CAAGGTAATAATTCGAAAACACTACATATCTGGTTTGTTCGGATGATGCAATTGAAGGGCTACGCA  
CCGCACTCTTGAAAAAGGCTTTGTGGTGGCAAAGAAATATGCAGTGGCCTCAAATGTGCT  
GATATCTTTGCAGAAATAATGACTGACTGTGCAAGTAGCACACGTCAGCGACCTATAAATAG  
AGCTAAAATCGCCGACCCGTTTGTAGGCGTTGAAGAGTGCCGAAGCGTTACTCGCTATGATTC  
CAGCCCCACTCAGGTGGAGCCACCAGAACAACCACTACTTGAAGAGCAACCTTATATCAG  
CGAACTCTACGCAGCTTATGGTGACAAAGAGGGTGTGCGGACTTTAGCGAGGAGCACTTGC  
CCATTACTGTGAATATTGCGAGGATATAAAAAGAACGTCGCATAGACTACTTTGCAGCAGAA  
TCTATACGGCGTGGAGTCAGCGAATTATATTAGGAGAATACGCCAGCCAGTTTGTATGATT  
AAAAGATGAGACCTTTGACGGCGTAAAAAATACCGCTCGGAAGACTTTCCCGAACGGTTAT  
GAATGTATGCTTGGCGTTATGGAACAGGCTGTGCTTATACAAGTCAAAAAGTACATACTGAG  
CCAGTCGCCAAACTGGATAAGCAACAAAATCAAGATGGGTATATGCCATTTCTTGGTGAATG  
ACAATAAGCTCAGGTGGGTGAAGAAATGAACAAAATATTAGGTTCTCAGTTTGAAGCATCTT  
TGAGAATACTACTCCTTTAGAGGCGGTGCAAAATGAACCTTTATCAGAAGGTGCGATTGCC  
GCACTTACTATATTACAGTCTACTCGCATGACTTTGGTATATCCGAGTCGAATTTACATGGA  
GAGAACAAATACCGCTTTGGCGAATTTGCGTCCCGCCGTGCAACATTAAGGACAGCAATCA  
AACAGCTTGTGTTGGATAGGCTGGTCATGGTAATGCTCTCATCGAGCGGGTTCCATTACAAA  
CTCAGCAGCGAAGGGGTTGATTTCTCTTCGAATCTCAATACCGAGTACGCCGACATCTATTA  
TCAAACCGCAACACAGGTAATGCAATAGTTGGTATGTCTGAGCGCACACTCGGCAAATTGA  
TTAATCAGAAGTCTATTGCTTCAATTCGGGAGGATTAAGATATGGCGAAGTTTTATATCGA  
AAAACCTGGTGGTAACAGGAGGTGGCAAGAAACCCTTTCGTCGAATTCAGCGATGGACTA  
AATTTCAATTGTGGGACCGTCAAATACAGGTAAGTTACATTGTTGAGAGCATTGATTTTTT  
GTTCGGGCTTGAACCGAGCAAAAACAAGCCATTCGCTTCGACCCCTCCCTCGGTTATGACT  
GCTTCACGCTATATACACGACTCCCAATGGAACCGTTATTTTTTCAGCGCAAACCTTACTCTA  
CAAAGATAAGCCTTTCAGGGACTGACCCCAATTTTGAACACAGGGAGTACAGCCTCGGTCAT  
ACTGCAAAAAACAACATCAGTAACGTATGGCTTCAGATGATGGGTATCGATGAACCGCACA

AAATATTGCAGTCTCAGGCAGGAAAAGTGCAGCAGCTAACTCTAAGGTCATTCCTGCATATG  
TTTTTTGTGAAGCAGGATTATGTGTCGCGTACGCAATCGGTGCTTTATAACCCTGAACTCTAC  
CCGAACATGACTTCAACACCGTCTAAGGCGGCGGCTCTGTTTCTGATGTCCGGCAAAGATGC  
CAGCGAATACGAAGCGAACGAAGATAAGAAAATCCGCAAGGCAAAGAGAACCGCTGTGAT  
TGAGTACATTCGAGAAACTGTTGGACGATATGCCAAGCGTGAAAGCGAGTTGTTGGAGGCA  
CGGGAGAATTTTGCTAAAAACAGCCCATTATCACTTGACCGTGGGGCGAACGATTTCAATGC  
GGAAGTTGATGCAATCAACGGTGAGATTGACGAATTGCAAAGACATATAAATAGCAACATT  
GAACAAAGCCTTCTTTAATGCACGACATATATACTGGGAATAGCAAACCTTGCCGAGTGCGA  
GACCATAGCTGACCGCTTCGCGGTGCTTCGCAGCCAATATCAATCAGACATCGAGCGATTGA  
CGTTTGTGATTGACGGAAACATGGCACAATCGGCTCTACCGAAAAGAGAACACTGCCCGTTT  
TGCGACAGCGAGATTAAGGCAAAGAAAACGTCTCATACTGACGCAGCACGTGCCGAAT  
TGCAACATATCCGTAGCCATCTGACCGAATTGGAGAAGGCGGAGCGGGACGTTGCAAGAGA  
AAAAGACACCGTTGAGAATAAGGTCAAAGGCTTGAAGAACAAAAACATAAAATCGATGC  
GGAAGTATCGGCTGACCTAACCCCTCGGATGACAGCATTAAAAGAGAAATTGCGACTTTTCC  
GATATATCATAGAGCTAAACAAGGAACTCGATGTCATCCAGCAGGAGGAACGTGGTTTTAG  
CTCTGAGTTATTTGAAAAGGAAACCGAAGAAGAGCCAACGGAGTTCAAGCACGATATTAAT  
AAATCTTTGACCTCGAAATAGTGCAGGCTTTCCAAGAGAAGCTGATAGCTATATTGCAAGC  
CTGTCATTATCAAGGAGCGAGTTCTGCACGTCTTAATATGGAGACATTCGACTTGGAGGTCG  
GAGGCAGACCTAAATCCATCTCAAACGGCGGTGGTTACTGTGGTTTTCTAAACACAGTAGTC  
GCACTCGCCATGATTGAGTTTTAGAGAAACAAGGCGCGTATTCGCCGGGGCTTCTCATCGT  
TGATTCACCGATGACCCAGCTTCCGAGTCTGAATATAAGGCAAACAGGACACTCTAATAT  
CTGGGTTGCTGGATTATTTGCTTTCGATTTATAAGGATGATTTGGGAAAAGACCAAACAGCA  
GCGGAGCAGATAATCATTATTGAACATAAGGACAGACTGCCAATGCTCGTTGATAGATTGGC  
TAACTCACACACGTCAAATATAGAGTTTACGCAGGATAAAGAACATGGAAGGTACGGC  
TTCTTGATGGCGTGTACCAATATGAGTAAGTGCCAAAGTGCGACTCCGATCCAAGTGATTA  
TTGGCTACCACGTGAGCGAGGAACAAGGAGGAAACAAAGTGAGAATCAGTTATAACAAGTT  
GTGGCATGTGATGTTGGATAAAACAATGAATAAGGCTGACCTGAAACGGGCTACAGGCATC  
AGCACCGCTTCTATTGCTAAATTGGGCAAGGGTGAAAATGTTACGACCGACATACTGGTCAA  
GATATGTGAAGCCCTCGACTGTGAACCTCAGTGATATTATGGAACCTGGCACACGACGATGACC  
ACGCCAAACCGAGTAGGAGGAAAACATAATGGCAGTAACAAACGGAAACAACAACACAGC  
GAGTATCGGATTCGAACAGCAAATTTGGGCAGCTGCAGACATTTTACGCGGGAATATGGAT  
GCTGGAGAGTATAAACACGTCGTTTTGGGACTTATATTCCTTAAATATATTTTCAGATAAGTTT  
AATGAGCGGTATACCGAATTAAGGCCGACGATGATGATGTGGAGGACAAAGATGCTTATA  
CAGAAAAAACGTGTTCTTTGTTCTCCATCAGCACGATGGAATGTAATCTCTGAAGCGGCT  
CACACTGAGGAAATCGGCACAGTCATCGACGATGCTATGCGGGCAATTGAAAAAGAGAACAA  
AACAGCTGAAGGACATCCTTCCAAAACCTACTCCCGCACCGAACTGGATAAACGCCGCCTT  
GGAAATGTGGTGGATTTGTTACCAATATTCAAATGATTGAGCATGGTGATAGCAAGGATAT  
TCTTGGTCGCGCTTATGAATATTGCCTCTCCAAGTTTGCCGAACAGGAGGGTAAACGGGCGG  
GAGAATTCTATACGCCGTCTTGTGTGGTACGGACACTCGTCGAGGTCTTACAGCCATTCAA  
GGGCGGTTTTATGACCCTTGCTGTGGGTCCGGCGGTATGTTTCGTGCAATCCACGGACTTCGT  
CAAGAACCATGCAGGCAGCATCGGCAACCTCTCTGTCTATGGTCAGGACGCAAACCCACC  
ACCCGTAAGATGGCTTTAATGAATCTTGCGATTTCGTGGAATTGAGGCTGACCTTGGCGGATA  
CAACGCCGACACATTCCATAATGATTTACATAAAACGCTAAAAGCGGACTTTATCCTTGCTA  
ATCCTCCGTTTAAATCTATCGGATTGGAACGACGGCTCGCTGAACGACGACCCTCGCTGGCGA  
TACGGTCTGCCGCCCGCTGGCAATGCCAACTTTGCGTGGCTTCAGCATATGATTCACCACCTT  
GCCCCAACGGTAAAATCGGCATGGTGCTTGCAAACGGTTCCTCTCGTCCCAGAGTGGTGG  
CGAGGGCGAAATCCGCAAAAAGATAGTGCAGGACGACCTCGTGGTGGGCATCATCGCCATG

CCCACACAGTTGTTCTACACTACGCAGATTGCCGTTTCGCTGTGGTTCCTTAGCCGCAACAAG  
AAGCAAAAAGGCCAAAACGCTGTTTATTGACGCCCGCAAGATGGGGACGATGGTAAATCGCC  
GTCTGCGTGAGATGACCGCCGAGGACATCGCCAAGATTGCCACAACCTTCGAGGCTTTTGAC  
GACGGGACGCTTGAAGATGTGAAGGGTTATTGTGCCGCCGTGACCACAGAGGAAATCTCCA  
AGCAGGATTATACCCTTACGCCGGGGCGGTATATCGGCATCGAGGAGCAGGAGGACGACGG  
CGAACCTTTTGAGGAAAAGATGGTGCGGTTGACGGGCGAATTATCCGATATGTTCAAACGCT  
CGCATGAACTGGAAGACGAAATCCGCAAAAGGCTGGGGGCGATTGGGTATGACATCTAAAC  
TTTCTGATCTTTGCTTTTATGCTGATGGACGGGTCTCAGTCGCTGACTTGGATTTGGATACCT  
ACATCTCCACGGAGAATATGATTCCGAACAAGGACGGCATCACCCGCTCGGCAGGGTTGCC  
GACCGTGAACCAGACACAGGCTTATCAAGCGGATGACGTGTTGGTGTCCAATATCCGACCGT  
ACTCCGCAAGATTTGGTTTGCCGACCGTGAAGGTGGATGCTCTAATGATGTCCTTGTGCTG  
AGGGCAAAGGATACCTGCAATCCGGGCTTCCTTACTATCTGCTTTCGGACAACAACCTTCTTT  
GACTACGCAACAGCGACGAGCAAAGGAACGAAAATGCCACGAGGGCGACAAAGGTGCAATA  
ATGCTTTACGCCGTCCCTGACGTGCCTCTTGATACTCAGATTGGGATTGCCGACACGCTCTCC  
GCACTTGATGCTCGGATTGCTGAAAATAGAAAGATAAATCATCATTTAGCGGCTTGAACCTT  
GAGAACTGTATATTGCCTTTTCCACGCCCGCGATGGCTTCCGACAGATGCACTCGTCGGTGG  
TAAAGGCACAAACTCCGGGTAGTGAGTTGTTACCGCAAATATCTGGATTCTTCTGTCTACAG  
CCAAAGGTCTGCGTTTCAGAATCCAGTTCGTGGAGCGGGGCATCAAACGGGATTTTCAAGTG  
CTTATTCATCAAATGCCTTCTTCTACCGAGATTTACCGGTCATCAGCTTGGGGAGCAAGGA  
ATCCCTCAGTTGGGACAACCTACGGCTCTCGACCCGATTGTTTATAACCTGCTCGTAAAGCG  
GATTGAGCAAACCGCCAAGTTGATTGTAGCTGTCCTCATCAGGAATGATGACCTTAGCGTTT  
TCCAAGGCTTCACGCTTAATGTGTCCCATCGTAGTTGCCTTGTCCGCTGCCATTGCTACGAAC  
TGTGCGAGATGGTGACAAGTCCAAGTGTAGTAAAACCACTTATCATACTTGCAGAGACGTAAC  
CTTGAAAAGGTGCTGATTAAGACCACAGTCGCCGCGCACCAAAAAGTCAACGAGGAGGCTG  
CCAGACCATGAAAAAATCACGTGCCATCGTGGACGATGTAATCCATGCGGATGTTGGGTG  
AGCAGAGTTCGCTTGACGAGTCGCACGAGCCTTGCCGCAAGTTCCTTGATTTTGAGGACAGGC  
AACCCGACCTCACCTTCGGTGGGTCTGAACCGTTGCATCGCCAGACCGTTGAGGTAGTCGGC  
AATATCAAGGAGACTTTCGGTTCTCCATTCGCCGGGTATCTCCCCGCGAATGGCTCGAAGT  
CCACGAACCAAGACTTGAAAATGGCCTGTGCCATCTGCTCTAAATGATGATTTACCGTTCCT  
CCTGCCAGTAACAAACCTACACATTAGAAAGGCAGGAGAACTATGAAGGATAAACTCATA  
ACACAGATTCAGGCAAACATGGCATCGATGCTTAATGCAACGCAATTGGAGGAACTTAGAA  
GGTCTGACGCATGAGCTCCACGGCGTGGAATAATGAAAAAAAAGGCTTCTGAACCAAC  
GGAAGTCAAAGAGAATGGAGGATTGCTGGACGTGTTTATTGCGGCAAAACGAGTAGAAGGC  
TGTAGCGAGAAGTCGCTGAAATACTACGACTCCACCGTTCCGGCAAATGCTCGACAGTGTGGG  
TAAGCCCGCACGAGAAATCAGTACGGACGACCTGCGAGGATATCTGGCAAACCTCCAGAAG  
GAGCGAGGCTCATCAAAGTGACGATAGACAATGTGCGGCGTATTTTCAGCAGTTTTTTCGG  
TTGGCTTGAGGACGAGGACTACATCCTAAAAGCCCTGTACGCCGAATTCATAAAAATAAAG  
ACAGACAAGCCGATTAAGGAAACATTCAGCGACGAAAGTTTGGAATTGCTTCGCGATGCCT  
GCGAGGAAATTCGTGATCTTGCGATGGTTGACCTCCTCGCATCAACGGGAATGCGCGTCCGT  
GAACTGGTCGGTTTGAACCGTGAGGATATGAACTTTTATGAACGTGAGTGCGTAGTATTCGG  
CAAAGGTGGTAGTGAACGAGTGGTCTATTTTGATGCCCGAACCAAAAATCCATTTACTAAATT  
ACCTCAATAGCAGAGAGGACAACAACCCCGCACTGTTCTTGTGCTGACCCCTGCCCATGAA  
CGATTACTCATCGGTGGCGTGGAACACGGCTTCGAGAAATCGGCAAGCGGGCGGATATGC  
AGAGGGTTCACCCACACAAGTTTCGACGAACGCTGGCGACACGGGCAATCGACAAAGGAAT  
GCCCATGAGCAAGTACAGCGATTACTTGGTCATGTAAAGATAGATACGACCATGCACTACG  
CAATGGTCAATCAGGCAAATGTAAAGAATTCGCATAGAAAGTACATTGGTTAG

>KBTCE3-3

ATGATACAATTTCTCTGCATATGAACGAAATTACACCTGAAATCATTGAAAATGTCTGCAT  
GGAAAAAGGCGCTAACTCCGGGCTTACCAAAGTAACCCTGCCTGACCGTACCCTGGAAATTT  
TCGGGGGTATTCCGGGAGAAACGGCAGATATCCGCCTTTTTTACCCATAAAGCCGGGCGCGGC  
TATGCTCAGGTAATAAAAAGTGCATAAACCCTCTGCCGAAAGGGTCACTCCTGCCTGCCGTA  
TTTTGGTGATTGTACCGGCTGCACCTTCCAGCATATAAGCTATCCCCACCAGCTGAACTAA  
AGCACCAGATTATCTTGGCCGAATTTGAAAAAGCAGGGCTGGGCGGCACTTATATCTCAGAG  
GTAATACCCTCAGCAGCCGAATATGGCTACCGCAATCATGCCCGTTTTTCCATATATCACGC  
CAAGCTGGGTTTTGTAAACCGGTTTTTACGCGGCCATATACAGGTAGACCACTGCCGTATAA  
TGAATCCGGCATAAATAAAGTGTGGCCGAAGTCAAGATAAATGCGGAGAGACCCGCCA  
GCTTTCCATCCGCCACGCAAGCAATAAAAACAGCTATCTTATCCAGCCTAACTGACAAAAG  
CCGATATAAGCATTGAAAGCGGGCAGAAAGAGTACCATGACCTGCTGCTGGGGCATGATTT  
TTGCATATCTGCCGCTTCGTTTTTTTTCAGGTAACAACCCCCAGGCCGAAAAAATGGCCGGAC  
TCATAAAAAAACACCTGAACCTTAGCGGGCGGGGAAACGCTGGTAGATGCCTATGCCGGAGT  
GGGTACATTTGCAGTCCTGCTCAGCCCTGACTGCAAAAAGGGTAATAGCCATTGAGGAATCTG  
CCGCCGCCATCAAGGATGCCCGCCTGAATATTGCGGGCATAGATAATATTGAACTTATCCAG  
TCTAAAACAGAGGACGTTATCAGCCAGTTTCAGGGGCAGATGGACGCACTTATACTTGACCC  
GTCACGCAGCGGAGCCACCCGTCTGTCTTAGCCAGCATATGCCAAAACCCGCCCCCGTAATC  
TGGTATATGTGGCTTGTGACCCGTCTTCACTGGCCAGAGACCTCAAATACTGCTTGGCGGC  
CCGTTTGAACTTTACAGGTAATACCGGTGGATATGTTCCCCCAGACTTACCATGTTGAGAC  
GGTAGTATTGATGTCAAGGGTAGATAAGTGAGTGTGTGAAAAGCCCAGTAAATAAGGGCAT  
TTCGAGGTTTGAGAGCAAAAATTTGATGTATGAAAATCGTGAAAATATCGCTTCGCGGGAAT  
AAGTCCAAAGGCATGATTTTGAACGTGACAGAGCGATTTAGATGTCAGTGTTTGGCGAGTGG  
TCAGTTTAGATAACATGTGTTTACGAGTGGTCGATTTAGATGTTTTTTCGGATTTTCCGGGTT  
GTGTGGTCAGGTTGGATACACAAGTCAATCTCGATATTTTATATTAATAAATGGAGGTTTTT  
GAATATGGATTTTGATAACGGATGCTGTTGCGGATGCAATACAGCAGATAAAGAACTGGCT  
AAGGTAAATAAGTGCCCTGTCTGTGGTAACGAAGGAATATCTGTCAGCAAGATAACGGTTG  
AACATTTAGTGGCAGGCGACTACCGAAAAACCATTGAAGGAGATGGCTATCGGATCTGTAT  
GAATGAGGACTGCAATGTTGTGTATTACAATACCAATAGTGGAGTAAAATTCTCGAAAGACC  
AGGTCAGTGTTCCCTGTTTGGTTTAAAAAAGATGCAAATCCTAAGTATGCATGTTATTGCAGC  
AAAGTAACGGAAGAGCAAGTAATTGAAGCGGTAGTAAAACATGGTGCGAAAACAGTACAA  
GAAGTAAATGCTATAACCGGAGCAATGAAAACTCTAATTGTAAGGAAAACAATCCGTTGG  
GAGTTTGTGCCATAAGATTATTCAGGAAGCTATTGATAAAGGCTTAAACATGAAATAATTC  
AAATTGATATGTTCTCTTCAGCCTCCGTTTTTTTCGGAAGATAGCTAAAACAACATAGATATATT  
CCTCAAATGTAAGGTTAAAAAATAGCAAGGCATCCTACGTCTAATTTTCGTAGAATGCCTTG  
CTTGTTTTATCGTTATCCTTCTACATCCACCGTCACAACAGACTTGAATTCCACGGTGAATTT  
GTCCTCGTAAACGATGACCTTTTCAATCAACCGCCGGATGAGTGCTTCGTCTGATTTCAATCA  
GAGCGGTGGGCTGTCCCTTTAGGAAATCGCCCATATCATCAATGCGCTTTTTAAGTTCGTCCC  
GCCAATGATATCGAGCTGTACTTTTTGTTTTTCGTACGCAGGCGATAAATCTCATCGCCCA  
CTTTATCATATTCAGCCTTTGAGTTAGCCAACCTTACAAGCTCGGTTTGAAGCTCCTCAAGCC  
GCTTGCTATGTCAGCCAGGGTTGTGTCGTTTTTTCATGGATTAAGACATTTTCGATGTTGCTCC  
TTAGGATAGACAGGAAGGAGTCCCTTGTGCGAGAGTGCCTGATTAATGGCGGTTACCAGTACC  
TGCTCAATGGTGCTTTCCAGTACCGTTTCGAGCATCGCAGAATTGGCCGGTGTTCACACCTG  
CTGATGCAGCGCAAACGATCGACTTTTTCCCTCGGTTGTTCCAATGAATCCTGCGGAAAAA  
TTCGCCGCAGCCTCCACAAATAATCATATTTGAAAAGCTGTGTGTACTGCTGAAGGTCCTGT  
TTTTCCCATTCGGGCTGGTGTGTACGATGCGGCGGCGGATGAGTTCCTCCTGTACCTGCATGA

AAAATTCACGCGGGATGATGGCCTCATGGCTGTTTTCCACATAATACTGAGGAACAAGGCCA  
TGGTTCTTTACTCGTGTCTTTGTGAGGAAGTCAGTGGTATATGTTTTCTGCAAGAGAGCATCA  
CCAATATATTTTTCGTTCCTCAAATCTGGTTGATGTTACTGGTGTGCCACTTTTCTCTTCCAG  
CGCCATTCAGAATACCGTCAGACTCAAGACCACGGGCGATTTTCAGCATACTGGCACCCCTCG  
AGGTATTCCCGGTAGATACGTTTTACGACCTCGGCTTCTTCTGGAACAATGATTAGTTTTCTTT  
TTTTCAATCTTGCTATAACCGAGGAACCGTGCACAGTTTATTTGGATTTCGCCCTGTTGGTAA  
CGGTATTGCAGACCCAGCTTCACATTCTGGCTCAGAGACTGGCTCTCCTGCTGGGCGAGGGA  
CGCCATGATGGTGAGCATGATCTCACCTTGGAAATCCATGCTATCAATGTTTTCTTCTCAA  
ATATACCGGAATGTTTTATCTTTGAGCTTTCTGATATAGTGCAGGCAATCCACTGTATTTCT  
TGCGAATCGGCTTATCGATTTAGTGATCACCTTGTCGATGTTGCCCGCCATGCAGTCATCAAT  
CATGCGGTTGAATCTTCACGCTTTTTCTGTGTTGGTGCCTGAGATGCCGTCATCTGCATAGAT  
TCCAGCTAACTCCAGTCTGGGTGGCTGTTTATGTATGCAGTATAGTGAGTGATTTGCGCCTC  
ATAGCTGGTTTCTGTTCTGTCGCTATCGGTGGAAACGCGGCAGTAAGCAGCCACACGGAGTT  
TCGGGTTTTCTTCATCCCTCTTTGCAAACCGGCTGTTTCTTGGCCGGAAGTAGTGTAACAG  
TCATTTTTTCTTCCACTTTTATTCCTCGCTTTCTATCAGACTGTAAGCATATTCGCGCTGCTGG  
AACGGGTCGTCAAACCGCTTAGTCCCTTCGATGATGCGGAATGTAGAGGGATAGACGACCTC  
CTTTTTACTTCTGGTTCGCGGATTCGGCCGAGTTTTTCTGCCCGCCTGATACGCTCCTCTTCG  
GCAGCCTCAAAGTATCGGAGTCGATAATCGCCGGATAATACTCATCACCGAGATAGTATTT  
GTTACGGAGCATCCTACCGATTCCCGCATGGAAGCCTTAATATCAGCCTTCTTTGCGGCCAT  
CGCTAACGAATCGCCGGTCAGATAGGACTGAAATAATGTTTTATCTGCACGGCGGCTTGTT  
CATCAATAATGGCTTTTCCGTTTCCAATCCGGTAGCCGTATGGGGTATGGCCCATCTATCTCA  
CCAGCCTTTCTTTAGCGTAATGCCGCATTTTAATTCGACCCCGATTTCCGTTCCGGAATATA  
CAAGTATCCGATCTACAAAGCGTGTAACAGTTCACCGTCAAAGTCATTCAACATTTCTGAC  
TTTGTAGCGTATTGTAAGAGCTCGCTGACTTCATGCAGATTTATATTGTGCTGTTTATGAAG  
CGAGATATGGATTCCTTCTGACGCTGTATGCGCTCGGCATCCTGCAGAAGTTCATTATTCCCC  
TTATTA AAAACGGCAGGCTCAAGGTAGCCTTTAGTCATAAGGCCAGTAAGTACCTTTCTGCTG  
TTCCGCGTTTTCTTCGAGCTTTTTATCGAGGTCATGTAGCCTCGCCACGCTATCTTCGGAGTT  
GATACCGCGAAGTCCCATCAGCAGGGGTCTTAAAACGGCTTGATGACCGAAGATGAGTTTGT  
TCATCATGGTTACAAACGCATATTCAAAATCAGGTTCCGGAATGTATTTACGGGAACATTTCT  
TCGGTATCTTCTATATGATTGGTACAACACCAGGCGATAGTGTGCCTGCCGGTGGAGTGTAT  
GCGGCGCTTGAGCTTACCGCCGCACTGACCGCAGATGATTTTACCCGAAAATGGGTAACGGT  
TCTGATACTTTTTATTCTGCTTTTTCCAATCCTTTTTCTTACCGCGCTGTTCTATGATTGACTG  
CGCCGCTTCAAATCTTCATGGTTGATAATCGCGTCATGATGGTTTTTAATCAGGTAAGTGGTC  
TTTTTACCGTAATTGTAATGGCGGTTGAAGTGCATCGGTGTAGGTCTTCTGAAAAATGG  
CGTCGCCAGTATATTTTTCAATACCGACCATCCCTCGAATAGTTGTCGCCGTCCATCGACCGC  
CTTTCTTGGATGGAACGCCCCGGCAATTCAGTTCCTCGCAATTTTGCCAGTGCCCTTACCCG  
ATAAAATTTTCGGAGAAGACTAAACGAACAATGTATGCCTGCACTTCATTACGATTAACCTTT  
CCGTCAACGGTATCGTATCCATAGGGTGGATAGGAAATCTTGAAGGTTCCGTTTTGGAACT  
GCGCTTACCGACCATTTACTGTTTTCCGCAATGGAGACCGACTCGCTTTCAGCCAGTCCACT  
TAGGATTGACAGCATGAGTTCGCTTTCCATTGAGCCTGTGTTTATGTTTTCTTCTCGAAATA  
GATAAAGATGCCGAGGCCAAGCAGCTTTCTGACCAGTTCAGACAGTCAGTTGTGTTTCTTG  
CAAACCGGCTGATCGACTTCGTTACAATGAAGTCGATTTTCTTGTCTCACAGTCGGTAATCA  
TGCGAAGCAGCTCCAGCCGCTTTTCTTTTTCTGTGCCTGTGATGCCTTCGTCATAATAAAGCC  
CGGCAAACCTCCCATTCAGGATTTGATTTGATATAGGAGTCGTAATGCTTAATCTGTGTGTCG  
AGACTGACAAGTTGATCGTCACTATCGGTGGACACACGGCAGTAAGCTGCAACCCGCGAGCTT  
TGGACGCTCTGTA AAATCAGTCGTATTTTACGCGATTTTCTGTTATCTTTTTCAACTTTTACCT  
CCTGTGAGTGTGACATATTACCTCTAAAGTTCAGTAATATCAACGGTTTTACGGCATAATCT

GTGCAAGTGCAGGAGAGAAAAGATTGGCGGTTTAATGCGGTTATCTTGTTAAATTCCGACAAG  
GAAATAAGTCCGTTTTGAAGCATAGAGTCAAGTATCCGCTGCGCTCTTACATAATCCACTTC  
ACGCTGCAATTGCTCCTGCGGAACAGGCTTTTTTTCATCTAAGGTGCAATGTACAAGCTGTTG  
TTTTTGTGTGTTTCATCATAAGGTTGCCTCCGTTTCAAAGGGAAAAAGAAAAACCCCTCACCA  
TCCACAGGACAGCGAGGGGTCAGTTGGCAACCGAAACGTGCGATTTATTCGATTTTGTATGTA  
GGCGTCAGGAAAGCCAGCCGCCTTGACTTTAGCAAGCATAGCATCTGCATTTGCCTTGACGG  
AGAATGCTCCAACCTGAACACGATAAAGCTTCTTTGGCTGGGTAGGCGTTTCGGGTTTAGGA  
GGTTCGCTTGTGTGAAGCAGTTTCTTAACCTCAGCACGAAAAGAATCCATGCACTTGCCGTG  
TTTCGGGAACCAGTGCATGACATCGCCATGGTTGCTGGCAATCCCCAGCTTGTAGCCTTCGC  
TGTGGCAGATGATGTTCTTCTCCGTCAGTCCGTA CTGCTTACAGAGATATACGCAAAGCTCC  
ACGGCTTCGGAATAGACTTTATTGAAATAGGTCGCATCGATCAGCCCGTCCTCGCAGATTT  
AAAGCCGATATGTGTATCGTTCGCGATAACCACGGCGTGCCATCCGCGATGGTTCCAAGGCA  
GTGTCTGATATGTTGCGATACTACCGTCAGCCAGTTTGGCGATGAAGCCGTGAACGCAGACC  
TGCCGCCATCCGGCTTACCTTGATTCCAGTGGTTGTTGTATTGGTTCTTGCCGAGTAAGCCG  
TCGTCGGGTCCGACATAGCGTTTTAGGTTGGGGTTATTGCCCCCTGTGGAATGAACCATAAT  
GCCTTTTGGTGTATGGTTTTGCCCGCCTTATAACAGGCATTGTTTGTGAATATCAGTTTACG  
TAGATTCATTTCTGCTCATCCTTTCCGTGAAGTTGTGCCAACACGTCTTTCAGCTTTTCAGGC  
ACGGGTAACCCAATAGCCGTGGCATTTCCTAATAGCGATACGCCCTCATTGGCGATGTAAAA  
GAAGATAACTGCTGTTCCGAGCGGCGCGCCTGTGCCATTGATTAGATAAGCGTCGATAAGAT  
GACCGATACCTACTACGAGAAAAATAGCTACCTTCTTGTAATAACCATGTGCTCCGATTCGG  
CTGGATAGCTTCTTCTCAACAATTGCACGAAGTACCCCTGTGATGTAGTCCACGACCACAAA  
GGCAATTAGTGCATAGAGAAAACCGTCAAGCCCGCCAAATACCCACCGAGTAGTGCACCC  
AGCCCTGCGAACGCAGTTTGCCTCCAATTCCAAATTTCTTTCATGTTGAATTTCTCCCTTAA  
AAAATAGTCACGCCGTTTCAGATTGGACTTCTCGGATGCTTTGCCGATCAAATCTGAAAGACG  
CGCTTTGCCTTTCCGTCCGCCGCTGTCCACGGTGAACGCTGTATAGAAACCACCCCTGCCGA  
AATTGTGCGTCACATCCGTGACCGTACCGATGGTTTCGGTTTTTGCACCGCTGACAATGCGC  
ACCTCGTCTCCGATGGTGAGCTGGGGCGTGAAGATGCCGACGAAGCTCTCCTGCCTGCCGGA  
TATGGCAATGGTCTGTGCCAACTCCTCAGCCATAGCCGTTATCTCAGCAAGCGTCGCACCAT  
CGGCGGCTGTGACGTAGGTTGTTCCGGTGTGACGGCTGAATCCACCATTTGCTTCTGGGAACT  
GTTGCATAAACCGTGTTTTCCGGGTTGGCGCAGGTAACGCAAACCCTGCTGACCGCTTCCGA  
ATCGTCGTATTCCACACTGTAGCTCCAGCAAGACTTGTACGCTCGAAGGTATACACAGCAG  
GCTGGTCGAAACGGGCGTCAGTAACAGCCGCCACACCGATGACGCCATTTGCTGTTTCATCA  
ACCTTCCAGCCATCAATCAGAGATATGATCCGCTTGTGCCGTCCAGAATGGTGACATCCGG  
TTCAAAGCGCAGCTTCCATGCCTTGGTGTGTTGCCGACAAAAAACCTCCACCTCGGCGA  
GGCGAAGAATTTCTGCAAGTTCAGCTGAAGAGTTGTTTCTTCAAAGGTGTTGTCTCCTCGTTA  
AAGGTCTGTTCTTTCAGCAGCTTGCCGATTGCGTTTTCTGGCGGATACCGATACTTTCTCGTCT  
GGGTACGAGACCGAAGCACTGTCGATATAGAAAATGCCGAGCATAATTTCTTCGCTGTCACC  
GAGGGAAAAGTACAATTCATCTTGGTGGCGGGCGTCACGAAAGCACGGTAACGATTAAGT  
AACGCGCCTTTTATGTTGAGCAAGGTGCAAGACATCTGCGAGACCCCACTACCGATGCTGAA  
CTTGACTGACCCGTCGACAAAGGAATTTGTAATGTCGGTCCGCGCAGCATATACATCACAAAAC  
GGTGGTCGCCCTCGGCACTCCAGAATCCATATGCGCCGTAATGTGCCACTTTTTTGTATGCTCG  
GATACGACACCGTTTCATCAGGTGATATTCTGCCGGTTTCCGTATAGGTCAGACTGTCATATA  
AACCGAGAACCGGGTCCGCCTTACTTCCGGCCACGGTGCCATCTGCGGAAAGATATATGAA  
ACGGAGCAGGTTATCCGAGGTGTGAATCACCTGTGGATAACAAGCCTGCTCCGGCATCAAGG  
GTATATTCAAATGTCAATGTCATCGCATACCCCCGTTGCAGCTGAACCGAATAGGTGAAGC  
GTAGCAGATTGTTGAGGTCTTAAACGGGTATTCAAAGCGCAAAGCTGGCTGTGATCGATGCA  
CCTGCCGACAGGTGGTGTGTAACCTTAGTCCCGACACGGTCTTACCCAAAAAGAAGGTTGA

GCCGAAACTCTGGCCGTCCTCGTCGGGAAGCTCTGGTAATATAGATTGTAAGTCCAGTTAT  
AGCTGACACTGCCCGATACGGTTAAGGTCTCTACCTGTTTTGTTCCCTGCATTACCTGCGGCGT  
CAACAGTGGATGTCGGTATAGCGGTTAAACCGGTGCAAGTATCATTGCGATACTGATGTTG  
AGCGTAGAGTCATTGTCCGCCCGCTTTTCGCAGTCAGTCGAACATATCTGCCGTTATCCGC  
GCTTATTGTGAAGAAGTCGGTAATGTCGGAATTGAGCGCGAGTGCGGCGTTTACCTTTGCTG  
CAACGGTTGTCGACGAGTCTCCGCTTGTAACCGGCACCGAAAGGGTTATAGGCGAGTTCGCC  
ATTCGGCAGCCGTTACCACAACCGTTCGCGTTTCCCAGTTCGGATAGTTCGGGTCACATA  
GATATTTTCTGTTGCTTTACAGCGGCTACTCCAGCAGTCGTATTGGTTCGAGGTTGAAACTGT  
GGTCAGCCCAGCGCAAGTACCATTTGACAGGGCGATATTCAGGCTTGAAACATTTGCTATCG  
GCGTTTTCGCTGTCAAATTACATCCACACCTGAAACTGACGCATCATATACAGCTGAAATA  
TTCGCATTGTTTTCAAGGGCTGTTTTGATCTTGCCCGCCACAATACTCGCCGTATCTGATGAG  
GCTACTGGCACGGAGAGAGTGATCGGCGAGCCAGTCATGCCGCTTGATGTTACAACAACGG  
TGGCATTGCCTTACCCTTAAAAATGTCCTCCAGTACCTTGCTGATACTTCTGTGAATTTCC  
AAACCTGACCTGCCCTTGAAAGCCCTGATACATCCGTCCAGTCTGTGTCGTTAACTGAATAC  
TGTATTTTGAGAAGATCGAGCCTTGC GGTCGGAATCGTCAGAATATCAATTTTCAGTGTATT  
ACAAGGCTTTGCAGTCCCAAAGTCTATTTTAAATGGGGCTTACATCGTTTACCGTGCAGGAGG  
ATGGATATACCGTCGTGTCATAGCAGCTCCACCATGCAAGAGGGTCTCGATAGGAATAGTTG  
CTGCTTGGCGTTTTTGTGCAAGGTCACCGAAGGATACTCCGGTGCTTTTGCAGGTTAGACCT  
GCTGTATGGTAGTTTTTCATACCAGTCACCGCAGTTGTTATCCAAATCCACAGTATAGTCGGTA  
CCTTCAGTCATTTTCAGTGTGCTTTATAAAAAATACGGACGGTCCCCGACTGAATCAGTGGGCA  
CTTCATACTAAACTCAGTGGTAACGCCGTACCCTCACCGATAACGAGGTGGTCAACCGGAT  
AGGGTGGGAAAATATCATGGTTCGGGAATGTAATGCGCCGACCCCGGCGACGCCGAGATG  
CTTGACGATACGGTTGTTACATTCGCTGTCAAGAAACGTAGTGACGGGCAGGTCGTATTGGT  
AGGTGGTGGTATTCCCGGTGCCACCGCTGAAGGAATAACTCTTACTACCTTGATATTTAACG  
CTCATATCCGATGAATAATCTACTGGGAAGCGCGAGAAACGTACAGTTCGGTCCGTACTGCC  
TGTGAGCAACCATTGGAACAGATAATTGTTTTCTGCCGTGGGATATATGCCGTTTGTTCCAA  
AACCGGAAGGGGTGCAGGTAGCGTAGAAAGTTGCGGTTATATACACCACATCCGTATCAGT  
CTTTGCTATGGCGATCTGGTTTCCTTCGGAATCCTGCAGCATGGCGTGGGACATGATGTAGT  
AATTGGTTGAAAAGGTGCCGCTGTAATACCCTTCAAGCGCCACCTCGGTAATGGTGGAGCCG  
TTACACTCGGTTCGCTTCCAGCTTGATTTGCTTGGTTCGTGTGCGACGTCGGATATTCATATACC  
GTCTCCAGCGTCGTCACGGCTTTGCGCGTCAGATGTGTA AAAAGGTTCGGTATCCGTA ACTGC  
AGGTGTTCCCGTGCCTGTGCCGACCGCGATATATCTGAACAGGTTCGGTTGTTTTACTAAGCG  
GAGAAGCGGTCAGCCTACTGTAAAATAGTAGTTTGTAAATAACATTGAAGCCGACCGCCGTC  
TGCTTTGTTTTGCCGTTACGGCATCGACCACCTTGACGTCAAACGGTTATGCAGAACGGC  
TCGTTCTTGATTTTTTCATATTGAAAACCTCCTAAATCGGTAATGTGGAAACAGGCTGCAGGCT  
TATAGACGAAGCCACAACAGCAATGATCGCCGTATGAGCAGGCTGGAAACACTGGGTGAAC  
ACCGCCTCGTCAATCCATGCCCCAGTTGAAACTATCGAAATGCCTGCCGTTTCGTTTTCCAAA  
GGTGAAGTAGTCCATAGTTTCTGCGGCGGCGACAGCACTCAGAGTGGGCAGGAACCATCTTT  
GCAAACCAAGTTTGTAATACCAGAGAGAACGGTATTCCGGCATTGTAATGGTTACCGCTACC  
GTCCTGCGGATATCGGCGCTCGTATACAAAACAAGCGCTTGCTCTTCGCTGTCATAGGAAGC  
GGATGTA ACTGTACCCCTGAAACGGAAAGGGTGCATTTTATCGGGAACCCCTGAGTCGATAC  
TTCCGTATAGAGGATTTGTAAGATGAAGCTTGAAGCCGTAGCAGACGAAATCCGTCTCGCGG  
TTCAGCTTCTCCACCGAAGCTACGGAGATTTCTACTGTGTCCGGCTCATCCAGCAGAACATA  
GGGATAGGCAGTATTCCCAGATGCGTACTCTTTGTTCAAGTGTGTCCAGCTCATTATATCGGA  
AATCCACATTTTACGTTTGCAGCGTTGATGTGAACTGTTTCCGGTTCGGACGCTCATTCCGGC  
ATAGTTGCGGTGCGTCAGTGTAGAAGCATTCCAGCCGTTGTTCTGCGTCAGGAATCCGATGC  
GGAAATCGTTGGTGC GGATAACCGATAGTGTGCTGTTGCCCGTACCAAGCGTGGCTACTTCA



TGCTCCGCTTCCCAGACATAAGATCCGTTTTCTGACAGCAGAGCGCCCGGTAATACACTGA  
TCCACTTTTTAGATAACCGATGACCAATCCTTGGTCAATGTCCGGTTCGACACTGGACTGCCA  
GCCCTTGCAGGCGGATATCTGGGAAACACCGGTGGCAATCAGAGAGGCATTATCGCTATTCG  
TCCAGCTTTGAACATACAGATTGCCGTTCCGAACATAAAAAGATATACGGATAATCCTCGGTT  
TGTAAGTAATAACACTCCTTTTTCGGAGTTCATTTTTCCACACGCGGTTAAATTC AATCGCCACA  
TCAGTCGCAGCACCGAGTGTCCACTGATACTCCCACGGAAACTCCATGCCCGCCGGAAACTT  
CCGTTTATACACCTTGGCGACACCGTCGTCCAAACAGATGGCATAAGCAAGAGACAAATCG  
GATTACACAGCGGTCTGGCGCACAGCCACATCGCCGAACGCGGGAGCAATGTCTTCGTGAAT  
CGGCTCGGAGAGCAGCGAATTGACGGAGGTCTGCGTGGCTACTACGCGGAGATTTGCCATA  
CTTTTGGTGTTTTCCACCTTGAAGCGGTTAGCGAGTTTTTCTTTCAGCGCTGTCGGTATGCTTC  
TCATGGGTTCGCTCACCTCGCTTACCGCCGCAAGTGTGGCTGTGACCATATACCAGCCC GCCG  
CCTGATAATCAAAGGAGCCGAGTTCAACAATTCTTCCAGTGAAAACGCCCTGTTTTACAGAG  
CATTCAAGGAGCGGAACGCTGTCTCGGATGACATCAGCGCGGCTTTCCAGCTTCATTAAC  
ATAGAGCGTCAGTTCATAATGCACAGTCGGCGAACCGAAACGGGTGAGATACTCCGTCCCGT  
CAAGGGCGGTCTGAACCGTGC GGATGACCGCCTGCGTTTTTTCGGAAGCTGACAAAGTGCGTA  
ATGATTTCACTTGTCTCTGCATTTTTT CAGATAACTCATA CGCGCACCTCCTGTCTGAGTCGGT  
CAATGATAATATCTACGACCGAGGTCATTTACCAGCGGAATTGACGCCTTCCACCCGAATA  
ACACCCGTATGCTCCACGGTTTTTTT CACGTCAAGCGAGGTGTCATTCATCACTTTATGGATG  
CCGGTATTCATATCAAGGTCAAAGT CGGTGGGGATCGCGCCTGTAATGTTTTTTTCAACACC  
CTTCATAGCGTTGGTGAAGCCCTCACCGATACCAAGCCCCATATTTTACCAATACCGGCAA  
ACACCTTTGAGGGCGAGTTGATACCCAGCAAGCTTTTTTGCACCGTCAACAATGCCGGAAAAA  
AAGTCGAAACCTTATCAGCTATCCAAGAGCCGAGGGACTTGATGCCTTCCCATAGACCAGT  
CACGATATTCTTACCTATTTCAAACACAGAACCGACCGCTTTCCCAAGACCGGTTACGATTG  
CTATGATGATTTCCGGCAGTTTTTGAACAAGCTGCGGTATGGCTTTAATAAGGCCAACCGCA  
AGCTGTATGGTGAGTTCGATGCCCATTTCAATGATTT CAGGCAAATTATCCGTTATGAAATTG  
ATAATGGTTGTTATGATTTCCGGCAGTGCATCTATCAGTTTCGGCAGTGCATTAAGAAGTCC  
GGTAGCCAAGCCTTGAATAATTGCAAATGCAGCCGCAAGGATTTTATCCATATTAGCAAGCA  
GGGTGTCCACGATAAGGATGATGGCTTCGACGATGGAAGGAATCAGTTCGGCAGAGCAAC  
ACCTAAACCTTCTGCAAGAGCAGTCAACCAACTGTATCGCCGCTTCGACAAGGAGCGGCAAG  
CTGTCCACCAAAGCGTTGATGATGGTCATCACCGCTTCGACCGCCGCCGGTATAAGTTCGGG  
CAGGAGTTTTAGTAGGGTGTT CAGCACCTGTGTGAACAGTTCTGTTACCGTCTGTAGTAGCA  
TAGGCAACAAGTCGCTATCGCCTGCAAAATTGCATCAGCCGCCG CAGGCAGAGCCGCGAC  
GATATTTTGAAGACAGGCACGATGTTTTT GACCACCGATTGAAATGCGTCCACGAGGTTCT  
GTGTCAGGTTGGTCATATCGGCATTAGCGTTTCCAAGCCCCGCCGTAAATGAACCGAGGGCG  
GCTTGTAACAAACCGACGGAGCCGGAGATTGTTT GCGTGGATTCTCTTGCGAAATTGCCTGC  
GTA CTGTTCCGGTGTTTTCAAAAAACATCTGCATGGCGACCTCAGCTTTTTTCGGCTTGAGTCGC  
ACTTGCCCAAGTAAAGTCCAGCCCTTTT GCGAGAGCATAGGCTTCGATGTTGGTTGCGTTCA  
TGGCAACACCAAGGTTATCCATCATCGTGAAATTGCCCTTTGCTGCACCCGTAACAGCCTCC  
ATTGCCATTGACATATCGATGCCCATGACAGATGCCATGTCTGCCGCTCGCTGCATTGCTTTT  
TCGGTCAGTTCAAGGGACTTTTTGTTGCTCGAGCCCTGAGCCTTGAAAAGCGCACCCATCTT  
GTTTGCTGTGGCGAGGTAGTCGCTCTGGCTTACGCCGAGATTCTTATAGGCTTCCTCGCCAGT  
CTTTTGGATTCTCGTAGCGTACTCGCCGAATACGGCTTCTGAACCTCCGAGGTTCTGTTCCAA  
TTCTCCAAACTGCTGCACGACTTCTTTGCCGAGTTTTATGGCTGCGGCTCCTGCCGCCACAGC  
CACCGCACCCATAGACGCGCCTATACCTTTGAGGATGCCGCCAGTTTCTCAA ACTTACCGC  
CGGATTTTTCCGCTTCATTTGCGGTGTCTTTCAATTCGTCTCCGAGGTCGTCCGGTGGCTTCAG  
CGGAGTCATTAAGTTCCCGCTCCATTCCGTTGAGTTCAGCCTTGGCGTTGTTAAGCTGGATAG  
CCCAGTTCTGCGTCTCTTGTGCTTTTTACCGAAACTCTCGGCGGCGTTCTTAAGTGCGGATT

CAAGGGCAGAGATTTTATCCTTCTGTGCTTCGATGGCTTTATTCAGCACTTCATGCCGAGCAG  
CAACCGCTTGTATTGATTTGTCGTTTTTATCAAATTCGGAGGAGACCAGTTTCATCTCACTGC  
CAAGCACCTTAAAGGACTGGTTGATGTCGCGCAGAGCGTTCTTGAATTCTTTCTCGCCCTCCA  
GGCCTATCTTCAACCCGAAATTATCAGCCATTTGCGCGTCACCACCTTTCCTAAATTAGTTCT  
GACGGAATAATTTCTTCAATAAACATCTCGCGCTTGGGCTTCGCCAAGCCGAGGTA CTGCCT  
GTGGCATTCCACAAATCCATTAAGAGACCGATGGGAGTGAGCCACGTTTCTCCTCGGCAC  
GGTTCAGGTGAACCGTGCCATAATAGAGAAGTCGGGTAAACAACCTCATCGTCGCTTACCCGA  
CCTCCGCGTTTTTTGGGTCTGTCTCGTTTTCGATGTTGCGAGCCGTGCCTTTGAACATCGCCT  
CGGTAATTGCCGCTTGTAGGTCGCCAACTCCAAAGGTGAGGTCAGCAGTTCAACTTCTCCTCC  
TCGGTGAGCGGCTCCTGTGGTTTTGTCTTGTGCTTTAAGTTGTGAATGAGGATTGACTGATTG  
GAAAGTAGTGTAATCAGCCATATAATCTCATCAAGGGCAAGTTCGAAGTTTTCTGCTTTAAG  
CAGTTTTTCGCCAAATTCTCAAGCCCGCCGTAGCGACGGGCGATTTCTTGGTGGCGCGGG  
TGGTGAGGATCAACTCATACTCCGAGCCGCCGATATTGATTTTTGCGCTTCTCTCGTTATCCA  
TAATCCATTAACCTCCTTGCCTTGCGAATGTCGGTTCGTAGACGGCGGTATACCAACTGCTG  
ATGACGGTTGACTCGATGTCGCTGTCTCATCTTCGTCAGCCTCCGCTTTCGAAGGGTGAAGGTTG  
GCGTTGCCGGTTGCAGTTTTGTTACGGCGTAGTACCATGCCTTCGATGGTCGGCGTAGAAAA  
TGTGATACTGTCGCTTGGTGGCAAGGTTGGTGGAAAGGCACTCCGAATTTACGCGGTAGA  
GCCAAAAGTAGCGATAGTGACCGTTGCTTTTCTTGGCACGGAATCCAATTGCCACAGGTGAG  
CCGCCATCCTCGGAAGCTGAAATTAGCACTCCGTTCTCATCAACGATCGAGCCTGTAAGTGC  
CGCAGCGACACTTCTACCGATAGTGTCACGCGGAGGGTTCAGCTTGCCTTTTTGAATTTT  
GACCACCTCGGCGGCGCCGTCATCCGCATAGAGCGTGGCTTCCGCCAGCTCCACCGACAAC  
CCGAGATATTGCCTTTGCAAGCATTACGGGAGTGCCGTAGGTTTCATAGCCCGTGGTCTGG  
GCTTCGGTTATCGGCGCGTAATAGAGCCGGTCAAGTCCGATTGTAGCCATATTGTTTATTCT  
CCGTTTCGTATTCTTTACCCACATCGATGGCGAAGTGGTGGTAGCCGCTGTGCTCCTCATGTC  
CGATGTAGCGGCGGTTCGGTTATGGTAAAGCCTGCACCCAAAAGTGCTGTCGTGATTTGCCGC  
TTTTTCTGCTGATAGTTGTCCTTGGAAAAGAGGGAAATCCTCACTTCGGATATATCTATAAGT  
GGCTTGTGTCCCGAATAGGGCAAATATGTCTGTCATCGGGGTCAGCACGAGGTA CTATC  
GGGCGGTACGCCGCTGAAAACGCCGCTCCCATAGGGAGGACGGGCGTAAGTAAGGTA TTT  
AGTTCAGACAGTATGCTCATAACGCCGTCCACCTCCGATTCAAACCTTCGTTTTCATCGCTTCGA  
TCGCTGCGTTCTTGTACTACCGACTTGGCGGGCTTCAAAAATGGCTTCGGCGTCTGACCGTGC  
GACCGTATTCAATGATGTTAGCTATTTTAGCGTTGCTACCGCCGTCGCTCCTCGGTTCTTTGA  
AGCCGACCTTGATGTCCCAGCCGGAGCCGTCTCGCTTTTGCTTGGCGGGAGAAAGTCCGAGG  
GAGCGTTCCAACCTCGCCCGTAGAGCGGCTTACTTCTTTTGTGACGCGCCCCACCACTGAGGA  
GAGGTTGCTTTTTACTTTAGCAAGCACCACTTCGCCACCCGCTTCGAGTACCTTCGGGATAAT  
CTCGTCAGTCTTGTCCGCAAGGCGGGAGAGCCGTTCTCAAATCAGTAGGAAGTTTTAGTT  
CAACCTTTGCCATCACATCACGCTCCCTTCGAGTTTCTCGCAAAGGCACTCGATATACATCCT  
ACGGTCTCTGACATCTTACGCTGAAATAATGCGGTATCTACCTGTATTGCTGGTGTGATGATGA  
GTGTGCTGTCAACGGTAAGACCGGGTATTTTTCGAAAACGAAACATAACAGTAACTTCGGA  
AAACGCCGCCATATTCCGCCAACGCTCCGAACCGTGTTTTTCTCCTTTATAGGCACGGACGG  
AAGCAAGAACGGTGTGCGCTTTTTTTCGAAAAGCCCTCGGCATCCTTGATCGGGGTAGTAGTG  
ACAATGTTTATAAACGTGTTCATTTTCCCGAATGCCATAAGTCGGACACCTCCAAAAAAAAT  
TTCCTAAAACATATAGACAACTGATTTTCAGATATGTTATTATACATAAGTAAAATAACTTAA  
CACAAAAGGAGTGTCCATTATGTTAGCTACCTACAAGGATTTCACTTCAAAAACCCAAACT  
GTCGTAAGTTCGAAAACGACGACGATATGCAGAATGTTTTTGGTTTTCTCCTCGCAGGACTTC  
ATCATCGTTTCAGATGATAGACGCGAGCGAAGCTGGCAAACCTGCTCTTGCACCTGTTGCTGT  
CAATGTCGAGCATTTTTTCGCCGACCCAAACAAGTCGCATGATAATTCTCTGGACGACAAC  
TCACCAAGCAAGCAGTGGGGCTGATGATTAAGACCATACTTGAGCCTTTCGGGTACACAGTG

TGGAACAGAAAGACTTACCTAAAAGCATCAACGCAACTAAGTTTCAGTCTGCCTCAACATA  
CCGCTTTGACGTTCTTGCTCCAAGGAGCATGAAAATCGTCAAGCGAGTTGAAAAAATCATCT  
CCTAAACGCCCCATGACCGGTCAAGCCGTAACAGTGTGTTGACAGTGTTCAGACCTGCTGA  
CTCGCCTGAATGGAATCTGCAAAGAAGCCGCTGTGAGCCGTGCGGAGACTCGTACCAGTT  
GGATACGAGCATAATCACCGCTTGCTTGGTAGTAGGTGGCATATCGTTCCCGCCGTAGTAGC  
CCGAAGCAATGTGCTGATAGCTTTCGGCATAGTTTACGGCGGGCGGATGAGCCGCAGGAG  
CAAAGCATCGTCTTGGTCATGGGTTAGGATAAGGTTATCCTTGACCAGTGGTAACAGTTCGG  
TTGGCGTCATCGCCACTCACCTCCTTATTCGGGCTCAGTTTCGGTTCATCAGCCCTGCTGT  
TTTAAGCGATGCGAGAATTGCGTTAATCACAGTGTTTACTCCGGCAACGTCTCAGCCACAC  
TGTCAGCCACCGCTTCGGCGACGGGAACAGTGGGGACGGTAACTTCCGGGACAAATAGAAA  
GCCGTCTCGTCAACCGCCACGGGTACGGCTTCATCTGTCTTTGCAGGAGCTTTAATACCGCC  
GAGCGTGGCTTCGGTCGCCACTTGGAGCGGGTCAGAGGAAAGCCCTGTGACAGTGGCGGTC  
GGCAGGACTTCCAAAGTCCCGCCGATTACCCATTTTTACCCGCTTGCTCTTGGTAGTTCTTT  
GTGTTGTAAGTGTATCAGCCATAAGTCACGTCCTCCTTTAAGAACCCATCTTGAGAAGCTG  
AATGCCCTCAGACAGGATAACCTTGCCGTCCACGCGCTCGGTGGCGATAAAGCCAACCTGAC  
CGTTTCGGCATAGAGTTCGTTTCAGGCGCTGAACCGTTCTGCCCATACGGTTCGGCAATCCAG  
TAGTTGCTGAAATCACCGAAGGCAATAGGCAGAGAGGCAGCCGTTGCCGCAGGAACATAGG  
GGCTGGTGTAATGGGGTAGCCGAGCAATCTGTCAGGCAGCCAGCCTGAACCGACGGCTG  
CCATACATACACGCCGTTGCCGTCTTCAGCTTGCGGAGTGCGGAAATCGTCACGTCCTGCA  
TGAGGAACGCAGCGTTCCTGCGGTACGGAGACTTCAAGGAGTAGATCAGATCGATGAGATT  
GTCTACTGTAATTGCTGTGGCAGAACCTGCCGTACACCCGACATGACCGCCGTTTGCAGTGA  
AAATACCTGTGGGTTGACCCGTTCCGGTGCCGACACAGAATGCCTGCTCCTCGGCAACTCCG  
AATGCCCTCGCAAACCTGCGGGCGATGTAGGACTCCAAGTCAAACATCGAGTCTGCAGGA  
GTTCAAGACTGACTTTCACAAGGTCGGTCAGTTTGAAAGCGTCGATGGTCTTCTGGTTCGAAG  
GTCGGGTTGCTCTCGGTGTAGGAGCCATTCTCCGCTGTCCACTGGGCGGTGCTGTGCGTTGCC  
GCGACAGGGATTTTACGCTCTGCCGAGGTTGTGATTGTCTTGGAATGGAGCGGATGATGTT  
TGCTTCTTCCAAGGCGGTACAAGCTGACGCTCAAATTCAGCGGCACAAGATAGCCCCGT  
CGGTATCGGGCGAGGTGCTAAGGACATTATTGATGGGCTGCTTACCACGCAGGATTTTGCCA  
AAGTCCGCCTTGTACTCGTCGGAAGCCCTGCCAATTTTAGCTTCAGTAGGTTTGGTTCGGTGA  
ATTGGCGATAGGACTCGTGGTCGGCTTCGCCATTTTCAGAGTTCATACGCCTGCTGACGTTCCA  
ACCTCTCGATTTCTTGCCGAGGGAAACCATATCGGCTTCCATTTTGTGCTACTCGGCTGCGG  
CTTCAAGTGGCACCATGCCATCAGTGCCGCGTTTCTGGTTCGAGGAACTCCTTAGCGGTGTTT  
CAAATTTTGTGCGCTTCTCGCGCAGTTCAAGGATTGACTCATTGTCATTACCTCCATTAAT  
TTAGTGGATAATCAAATTGAGCCGCTTCTCAGCGACTCAGCGTCCACGCCTTTCGGCGTTT  
AGGTTTCAAGTTTTCGGGCTTTCGAGCGGAGCTTTCGGCATTACCTTGCCAAGTAGGGAGTTGG  
TGACCGCTCGCCTTGAGAAGGAGAATGTCACATCCTCCGAGGTTTTGCGTTTTGCGTCTCTA  
AAATGCCGTCGGCAAACCAAGTTCAATCGCCTTGTTAGCGTTCATCCAAGTCTCCGCGTCC  
ATCAAGTACTGATTTTTTGGCCTTACTGACTCGTCTTGATTTGGTAGGCGTTGACGATGGAT  
TCTTTGACCTCGGCGAGCATATCGATGGCTTTCGGCATTTCCTCGCTGTCGCCGATGGCGATT  
GTCAGCGGGTTATGAATCATCATCAGGGCGGTGGGAGCCATAAGCACCTTTGTTCCCGCCAT  
TGCGATGACGCTTGCCGCCGAAGCCGCAATGCCGTCAATTTTGACCGTCACGCTATGGGGGT  
AGTCCATCAGCATGGCGTAGATTTGGCTTGGCGGACGCAGTCGCCGCCCGGCGAGTTGAGC  
CAAATGGTGTGTCGCCTATGTCCTTAAACAACCTCGTCGCGGAACATCTTAGGCGTCACTTC  
GTCGCCCCACCAAGTCTCCTCCGAGATTTCCCCGTGCAAGTAGAGGACGCGCTCACCGGCGG  
TCTCGTCGCGCGCCAGTCCCAAATTTCTTTAGCTTACTTTTTACGATGTGTCCTCTTTTTCG  
TTTGTTTTATAGGCCGCACCCACGTCGGCGAGTTTGACCATATTGCCGTTTAAAGACGTGGATG  
TTGCCGCCCTCAGAATCGGGCAGAAGGTTCAAGTCTTCAAACCCCGCACGTCGTTGACGCT

GTAAAAGCCGTTTTGAATGCCACGCTGTAGCCTTGCATACGGCTCTGATAATCGCCGCGCA  
TTAAGCCATCCAAGTTGAACCTGACGAATACCGCCGCCTTTTCGGAAGGCAGGATGAGGGCT  
TGCTGTAAACTCTGCTCCACCTGACCACCAAGGATCGAGGGTGTATTTACAAACTCCAA  
GGATTGCTGCTCGATGTTGGAAAAGCTGCTCTTTTCAAGGTCGCCACCATGTGGGGCGGCA  
CTCGGAAGATACGGGCGATTTCTGTTTATCTGAAACTTCCGTGTCTCTAAAAATGTGCCTGT  
CGGGCGGTATGCTCATTGGTGAACCTCAAGCCTTCTTCAAGCACAGCCACTTTGTGAGCA  
TTCGCACCGCCAAACTGCGTCGACCAGCTTTCACGAAGCCTGTCAGCTTGCTCCGGCTTAAT  
CACGCCGGGGTGTTCCAATACACCGCCGGGGTTTGCGCCATTGGCGAAAAATGTGGCTCCGT  
AGTCTCTGTGGCAAGAGCAAGACCGACAGCATTCTTTGCCATCGCAATCGGCGAATAACCT  
ATAAGCCCCTCGAAGCCCAAGCCGGGGATATGAAGGACGCTCTCTTTTCGCAGCTTGACCTG  
ACCTTTGTCGCTTTGGTAGGTGTAGATCAGTTCGCCTTGC GGATTGCGGTCTACGCTCATTG  
GTCGGGCAACATTGGGTAGAGCGCCACAGGGTAGCCACGTCCATCACGGATAATCTGTGCG  
TAGGCGTTGCCCCACAGAAGCAGGTGTGCCATAAGCGTTTCCCTGAACACGAAAGAAGTCA  
TCTCGCGGTTTGGCTCGTCGTGGAGCAGACGGTAGAGCGGATGCATACTCGTGCGCTCTTA  
CCGCCGTTGTCTGTATAGCGGTAAACGTGGAGCGGCAAGACCGCAATTGATTTCGGACAGGA  
TACGCACACAGGCATATACTGCCGATGTTTGCATCGCTGTCCGCTCGTTCACAGCCTTGCCGG  
TTGTGGTGCCGCCAAATAGAAACGACCACCCACCGCCACGGAGTTCTGAGGTTTATCGCGG  
CTGTGTGGTCGCCATAGTCTTGAAAATATACTCATATAAACAACAGCCCCCTTTCATCGTAG  
ACTGAGCCTTGAGGGATACCGCCCGCGATGGTCGCTCTGGCAAAGCCATAATCATTGCCAC  
AACACCATCGATTTTCTCGGTGGACTTCTTTTTGTTGGGCTTGATGTTGCCCGCTGCGTCTTG  
GTCGATGATGACATTCCCCATATTCCAATCAAGGACAGGATGCCGACCGTGCGGATTTTAC  
CCTCCATCACGAAGTGGTAGAAGTCTTGCTCGGTGGCGACATACTTACAAAACCCTGCCCG  
AAGGGGACTACTTCAAAGGCGTGTCCGCGCCGAGTTCCTCAAGGTCACGACGTATCTTCTC  
TGCACCGTATCGGTCATAGGCAATCTCCCGTATCTTGAAACGCTCGGACAACCTGCCGATGA  
ACGCCACGATGTAGTCGTAATCCACAACATTGCCTTCGGTGGTATTAAACACGTCCATCTTCT  
TCCACACCTCGTATGGGACATGGTCACGGCGGGTGC GAAGGTCGATAACTTCTCCGGCAAC  
CAGTAGAATGGCATCACCGTGTATTTGGCATCACCCGACATTGGCGGGAACACCAATACCAG  
AGCCGTCAGGTCGCCTGTGGAGGATAGGTCAAGTCCGCAATAGCAGTCGCGCCCCCTCGTAGT  
TATCCCATTCGATTTCTCACCGAGGGCGTCCCATTTATCCATAGGCATCCAACGGATGTCGG  
CGTTGCACCACTCGTTTAAAGCGAAACTGCCGAAAGTGCATCTCTCGGCGGGGTTTTGCTTT  
GCCTGTTCTAGGCGGCTTGCACAGTTTCATATGGAATGGTCACTCCAATGCTCGGATTGAC  
ACGCCCTCAAACCTTATCGTCTTCCCAGTCATCGCCATCCTCGATGCCGAAGACGGCGGGGT  
AAAAGGACGGGTCAACTTTAGAGCCGTCCATCACGGCTTTCGCTTTGCAGTGAATCTCATAG  
CAAATGCTCGTCTTGTCTCTGCCCGCCGTGGTGATAAGAAAGTAGAGTGGCTGCCGTCTGGC  
ATCGCCTGTGTA CTGGTTCATCGTGTCAAAAAGTTCTCTGGTCTGCTGAGCAAACAACCTCATC  
GAAAATAAGCCCAGAGACATTGAAACCCTGCTTGGACTTGGTCTCGCTGGACAGCACACGA  
TAAAAGCTGTTTGTGTGTGGAAATGTAATCCGCTTTGTGGACGGTAGCAGTTTTGATATCGC  
GGCGATGTCTTTGCATTGCTCAACCATCGCCTTGGCGGTATTGAAAACAATACTCGCCTGATT  
GATATCGGCGGCACAGGAATAAACCTCGGCTCCGGCTTACCCTCGGCGAACAGAAGGTAG  
AGGGCTATGGCCGCCGCAAGCTCGGATTTACCATTTTTCTTACCAACTTCGACATATGCCGTA  
CGAAACTGCCTGTATCCGTCTCGCCGACGATAACGAAGATGTCACGGATAATCTGCTCTG  
CCACGGCATGAGGTGAAACGGTTTGCCTTACCATTACCAGGTGGTATGGCGGAGCATTGTA  
TGAAGCCCACCGCAAAGTCCGGCTCGCCGCTTGTGCATAGCGACTGGTGGGCAGCATGAGCTTT  
GTCGGTGTGATTTAAAACCGCCATCGGCGTAACCTCCCTTCGTGGTAATAAAAAAGACCT  
CCGTCCGGAAGCCCTGTGTTATCTATCTGTACGAGAGACAGCCCCTTGTGCGGGGTGTCCTCG  
CTTGTATACGAGTTTAGTTGACTTTTGGAGGATGATGGCGTTCCCCTTAAAGTTCTATGATA  
TCTGAATCGCCAGTTCGCCCGTGAGTATCAGCACTCCATATGCTTTGGTGTGTTGCATCATG

AAGTCCGCTAATTCTCCGCAGCCATCTCGAGGGCAATTTTGAGAACCGCGTTGACATCAAA  
CATATTACTTCTACCTGTCGAGGCCACTTTACGGCATTGTTCTTTAATGACCTCAGCTTTAGA  
AAGAATTCTGATTTTCATCTTCGCCGTA AACCGCTCCGAGAGTAGAGCCGTTGTCCCAATCAG  
CAAAAACCGTGCCGGTGTCTCCACAAAGATAACCGTACCTCGGTCGCCCGCTTAAGCGTC  
GTGTAGGGGTTCGGACATAGAAACCAGTTCAACCCTTGACCTTTGGCATACTTGAGCGCCG  
TGCTTCTACGACGGCCTTATTTGGGAAACTGTTATTCTTGCCCATCAGTCTGACCTCCGTTTC  
TGCGGCTCGCCTGCATAGCGGCGTAGCTTGCGTTGTTAGGAAATGAAGCGTTCCCCGAAAGG  
TTACGGCATAGCCATTTCTTGCTGCTCCGAACCTCGGCACCGCTCATTCCAAGCCGCACCAA  
GAAAGTGCGCAGGGCGAATTTCTCGCTTTGACATCAGCTCTGTGCCATGACCCTGCTGT  
GTTTCTTGACGTGCTTGACAAAGGAAGCAGACAGTTGACTATAAATAATTCCTACTCCCGTG  
TCCTCGGAATAGGGATATATGAATTGAATGTTTTCGCCTGTGTGCTTGACCTTGAGCGGTCTG  
CCGAGTGCCTTAGTAAGCAATGTTTCGTTTTCGACCTGCTGTTAATGTTATCCACCTGA  
GCATCGGTCAAGCCGTTTTTCGGAAGTCCACCGCAAAGCCGTCGTAGACTTCGTTTTTGG  
GAGCAACTCGGCAATGTCCACCCACGCACGAAGTCATAATTCTCGTCGAGTTGCCTGAGTT  
CGAGCAGAACCACATCGCCCTCGCAGAAGTCCATCGAAAACCGCCAAGCCTCCAAGTCGGT  
GGAAGCCGAGAAGACCTCCATGCGGTGAGGACAGTCGGGGTCGCTGAGTTCCGCTTGGTAA  
GTGTAGCTTTTCGGGAACATCGCTTGCTTGCAATCCGTCCTCGCCGTTGAGGTCGTGGCGTTCT  
TTCCAAGCCCAAGTTCCTCACGTTCCGTGAGGTTCAAGTCTTCAAATGCCGGGGCTTCGTTG  
GTTTCGGTGGTCATCTCGTCATATTCCTCGCTGGCCGCCGTAAAACCGTGCAGCCCACAAAG  
GTCTGCGATCAGCCCGCTGTTGCTCGCCCGTAACCAAACCGTTCCTGTCGATGTGGTAACC  
GCCGACCTCATAGGCGAAGGTCGGGGCTCCGAGATACTTTGTCCGAGCGTTCAGTTCCTTGC  
TGATTGCTGCTACTAAGGATTTTCGTTCTGCGCCTGTTACGTTGTAAGAAAGCTTCATTCTCT  
TTTCTCCGTTTTCTTGATTTGTCGAGGGTGAACCTGTGGCAGGCTTTGTTGTCCCCGCGC  
ATTACATATATCACTCTAAACGCCTTGAATAGCAAGCATTTAGGGACAAATAAATGTACCGA  
ATATCAAGGGAAAACAGACTTTTATCCTTGTGTGTATGACACAATCCCACCGAGAACGAATA  
CCACGCACGGCAAAGCGACTCCATTGCCCCACATTTTATACTCGGCGGCATCGGAGTGCGGG  
TCTTTAAGCCACTTTATAATCTGGTTTTCGGCTCTTGGGTTTGGTGGATGTACCTATAATAA  
CGGTGAGTTTCCCAAACCTCCGACCAAAGGAGATGTCATCCTCGGTTGGATCAATTGTTCC  
AAGCCCCGCACACCAATCAGGCGGGAATCCTTGGAGCAAGGCGCACTCAGTCGGAGTGAGC  
CTGCGAACAACGTAGCGGTTCTCGACGATTACACTTTGAGAACCGCCACCGTTCGTGCCACC  
CGTAGATTTAGCGTTCCAGCCGTGTTGCTTTCACGGTAGCCGCTATGTTGATAATTCTCGAC  
CGTCACTCGCTCCACAACCGCTTTCCCTTCATCAATCTGCTGTTGCTGTGGGAATTTATAATC  
GGAAGCGCAGAGGGAGCCGACCTTGTCTTGGTAACACACCGCGTGGCGGTGAGCCTCCGTA  
AGGGTAAAGCTGACATCTTTGCCGATGCCGCTCCCTTGGGGACCGTTTTTATCCGCGCGCCC  
AATCATGGAACCTTGAACAGATACCACCGCCATGCCGCCTGCATTTTTGTTTGGGTCAGGAA  
CGGAGGTGTCGAGTGTCTTGC GGTTTCGGCTTCGTATATCCCGCTGTGCGGGTTTGCCGATT  
TCATTGAATTGGATGCTTGGGAGCAGATGCCGTAAGCCTTCGGCACGAACACGGTCTGGTGC  
TTGCCGTCGACAGTGTGGCCGAAAGGTTATTTTGCACAAGGGCACCTTTGCCGCCGCTTC  
GCAACCAGAGCGGATTTTTAGGGTTTTTCGGTTTCGAATACACACTGTGTTCCCTTGAAGTCTGT  
GCCGGTGAGGGTGTTCGCCACGTCCTACCAACCGTCAAGGCGTACTGCCTTTCGTTTCATGA  
CGAGGGGGACATTGCCGCCGCTGTTCCCATACGCTCTGTGAGGGTTTGCACCGTTCGCTG  
TCGTCAATCTTTATCCTTGAATCGGCAGGATGGTTTTCTATTGCTACTGCCAGTTGGTTATCG  
CCATATCGGCACGGAGCGCGCCGGTGGGTTTCATCTTGCCAACAATGACCGCCGACCCTTGA  
AGCCGCACCCGGCTCGAACACGATGGGTTGATGCCCATGTTCTGCGAGCGAAGTGTCCCCG  
TTACATTTTTCGGAAACGTCCATGTACGAGCCGCTTGGTTCATTTAAGATGCAGACTGTGCTTC  
CAGAGCCAACCGCAATACTTTCCGGCAGTTGTTTGCACGGGAAGCCGCCCTGCGGAGGATGC  
CCTCGCAGGCGCGACTCGTCAAATAGTATTTTTCCGGCACGTTTCGCTGTAAAATCGACGAC

AATGTAACAACGGCGGCGTCTCTGGGCGACTCCCCAAAATTGAGCGTCAAGCGTTCGCCAGC  
TGACGGAGAAACCGTCTCCACGATTTACCTGACGTAGACCATTTGCCCTTTTCAGGCAAA  
GGTACTGACAGGGTTTTATCTTTAATTTGAATGAGTTCATTGAGTACCTCCTGAAAATCAGCA  
CCGCCCCCGAACTGTACATACCCGGCACGTTCTCCAGAACGGCAAACCTTCGGATAGGTGTT  
ATCGGTAGCGGTAAGCATCTCTTTAATGATTCGCGGTATCTGATAAAATAGCCCCGACCTCT  
CGCCTTGAAGCCCCGGCGCGTTCCTCCCGCCACGGACAAATCCTGACAGCAAAAACCCGCCGTG  
ATGATGTCAACAGGAGGGAGAAGAGCACCGTTTATTTTATTGATGTCTCCGTAGTGCTTCAT  
ATTTGGGAATCGTTTTGTGGTGACCCAAATCGGAAAGGGTTCAACTTCTGAAGCCCAAAGCG  
GCTTGATGCTCGTTAAAAAGGCTCCGAGCGGAAAACCGCCGGAGCCATCAAAGAGCGAACC  
AAGTGTCAGTTTTTTTTCCACGGTTCGGCCACCTCCTTACCAAACCGGCATAGGGGAGGGTC  
TTGCCTTCACGCTCGCAGGTGATATCCTCACCGTTTTTGCCTTTAAATTCAGCATAGCGACGA  
AGAATGACAGATGCATATTTTTCATCCAACCTCGAGCATATTGCAGATTCTATCCGCTTGATCG  
CAGGCGATCAGTGTGCTCCCTGAACCGCCGAAGGTGTCCAGCACGATGCCGTTTGCCTGACT  
GCTGTTGCGTATCGGGTATGCAAGCAGGTCGAGGGGCTTGCTGGTCGGGTGGTCGCCGCCCC  
GCTTGGGTTTTGGCGAAGTTCATATTGTAGCTTCAGCTCTCCCTGCGTACCATTTATGTGACC  
CCGTTTTTCAGCCAGCCGTAGAGGATTGGCTCGTGCTGCCATTGGTATGGGGAGCGACCCATG  
ACAAAACCTGTCCTTGACCCAGATGCAAGTACCACTCAGATGGAAACCCGTTTCGCGAAAAG  
CCCTGCGGAAGTTCGCCCCCGGTGTCGGCATGGAAGATATATGCCGAGCCACCGTTTTCG  
AGGTTTTTCAGCAAGGTTACGGAAAGATGATAGCAGGAAGCTATAGAACTGATCCGCTTTCAT  
GCTATCGTTCCTAATTTTCAGCCCACCTTGCTGATTCGAAGCCGACGTTGTATGGCGGGTCAGT  
CAGAACAAGGTTTGCCTTGCCTCCGTCCATCAGTCTTTTACCCTATCGGCATTTGTAGCATC  
GCCGCAGATAAGGCGGTGCCGACCGAGCGTCCATATATCACCGGGCAAAAACAAAAGCCGCC  
TGTTCAAGGGCGGCTGTGAGGTTGAAATCGTCATCTTGCACCTTCGCCGTCGGAGTCCGCGAA  
CAGCTTTTCAATCTCGGCGGTGTCAAACCCGTAATCTCCAGGTCGAAGCCGAGTTCCTTTA  
GGTCGGCGAATTCCAGCGCTAAGAGTTCCTCGTCCCATCCAGCGCTGAGTGCCAGACGGTTG  
TCGGCAAGGATGTAGGCTTTTTTCTGCGCTTCGGTCAGATGTTCTACAAACACGCACGGAAT  
TTCGGTCAAACCTTCTTCTTTTGCCTCCATAATGCGTCCGTGTCCTGCGATGATGCTCAGGTC  
TTTGTCAACGATGACTGGGTTGACGAAACCGAACTCACGGAGAGAAGAGCGGAGTTGCAAA  
ATCTGCTCCTTGCTGTGGGTACGCGCATTTTCGTGCATACGGCACAAGCCGGTCTATATTAAC  
TTTTCAAATCGTTCGTAGTCTGCATTTATTTAAACCCCTGTTTGTGAGTAATTCCAAAAAG  
GCGTTCCTTTCTTCGCCCCCTGTGCCGCTGTGCCGGTTGATGATTTGCATAATAAGGTTGAAG  
TCTCCCTGCATTGCTTTGTAGTAAGCTGAACCCGCCGTCACATAGGGTGACAGCTTCAGGTCT  
TTGGTCATGCGTCCAATTTTACGGTTCATCGCTTCGCAGGCGAGAAATCCCTGCCTATTTAGC  
ACATAGTCCGATATTGTCTGCGGCGCGACATAGCCGTCACAGCCACGGGATGCGATGTATTC  
CTCGATTTCAATTCGCAGCACGTCGGCCGACGGCACTTCTTTTTACATTCCTTCATCGCCAT  
TGAGAAGTAGTCCGCCATCACGTTTTTGAAGTTACCTTTTTTGGTTTGGGCTGACCCATACT  
GTTTGTGCTGATGGGCTTACCTTCGAGTTTTTTATCACTTGTATTTTTCCGAGGACGACCTGC  
CCCCGGACGATACCCTCCGCTGGGCATGAGCGTCACCTCGCTTTGATTTTGATTTCCGTTTTG  
ATTTTTTTGATTTTTGATTATTGAGAAATTCACACGGCAGGCCGAGCGCGCTGCCCGTCCTAA  
AGGCTGTAGAGATGCTGACCGCCCCTCGGTCAACGACACTCTTAAAAGTAATCGCCTTTCTG  
CGAGTGCAAACGGCTGTGGCACTCGGAACAGAGAGCTTGAAGATTCCGCCAGTCGTTTCGTG  
CCGCCATCGGTCAGCTTCCGCCTATGGTGGACGAGCGTTGCAGAAACGAGCCGTCCTTGTC  
CTTGACACCTCGCATAGAGGGTTTGTAGAAAGGAACGCCGCTCTAATCCTGTTCCAACCTCC  
TGCCGTAGCGTTTATTGGCTTCGGGGTCCCGAACAATTTGGTTGTATCGCTTTGCCTCAGCCT  
TGGCGTGTTCCTCACAGTACCGACTTGTGGTCAGCTTGGGACAGCCGGGGTGCAGCGAAGGC  
TTCTTTGCTTTGTAGGGCATTGTTTTTCCCTCCGTTCTCAGGGTATAGAAAAGGACGCCCCG  
TGTGGGAACGCCCTCATTGTTTCGCCATCATAACAATATCATATGAGCCGCGTGGCTTTCTAT

GGTTTTAAGTGGCGAATCGCGTCAACCTCGTTCAAACCCCTGTTGTGAAGCCGATGTACCCA  
CCGTATGTCAAGGTGCAGTTCCACCGAAATCTCCTCCCAAGTTTTGAAGCACAGATACCTCA  
GTTCCAATATAGTTTTGAAGGTGGGGTCTTCCACACACTTTATAATGGTGACGATTTTCGTGCT  
TTAGGTCTACAAGGGCATTAAAGGTGGTGTATTATTTCCGACTCCAAATCCATCATCTTCACAA  
TCACATCTTCCATACGGTGGATGTTGCGTGTCTCCTTGCTGGGCGGCACGTGACAGAGGGTG  
GCGACGGCTTTGGTGGAGAGGTCTCGTAGCGACTGCACCTGCTCCAGTTTGGAGTTGATGCG  
ACGGTCAATGTGATAGGCTTGGGAGAGGTACTCCTTTGCCGTCAGTTCTTGCGTGTTCATAG  
ACTTGCCCTCCGATACAATGTGGTTTCCCTCGGATTGGCAACTTTTGACTCCGTTGATTGTCA  
CAGATTTGCTTTGACCGCATCGATTAAGGCGGTCTGTGTCTATCCTTTTTCGGATAGGGCTTT  
TATAACACGCTCGTCGATGGTGTCTTTGGCGGTGATATGATGGATGACCACCGTTTCGGACT  
GCTGACCCTGACGCCACAGGCGCGCATTGGTCTGTTGGTAGAGTTCCAAACTCCATGTCATC  
CCGAACCATATAATTGTGTTGCCGCCACTTTGCAGGTTTAGCCCGTGTCCCGCCGAAGCGGG  
GTGGATTAGGGCGACAGGCAACTCACCGCGATTCCATCGGGCGATTGATTCCGACGTATCCA  
TCTTGAAAACGGAATGTGGCGGGATTTACGCCTTAAGGCAATCCGCTCCAAGTCGTGCTTG  
AACCAGTAGGCTACCATCACGGGTTTGCCGTTGGCGGCTTCGATTAATCCTCCAAAGCATC  
AAGTTTGGCGTCATGGATGTGGTGATAACTACCGCCGTCACCATAAACCGCTCCGTTTGCCA  
TTTGGCACAGCTTATTGGAAAGAGCGGGCGGCAATTGGCTGCGGTAACCTCGCCATCTGCAAGC  
TGCAGCACCAAATCCCGCTTCATCTCGTCATACCGTTCACGCTCATCATTCGACATCCGTACA  
GGATATTCGGCGGTCACGAGTTTTGGCATCTTCAGGTGATCGGTGGACTTCATGCTGATTGT  
GATGTCGGCAATTTTGGCGTATATCCGCTTCTCGGCAGAAGGCTGTGGCTTATAGCTGAAAA  
TAACCTGACCGTTACGCTTGTGGGGGACAAAGTAGTTCGGTACGGTATTGTCCGATGAACCGC  
CCAAGCCGCTGACCCATATCAAGAAGCCGAAACTCAGCCATAAGTCCATCAAGCCGTTGCT  
GCTCGGCGTTCTGTGAGTCCCACGATGCGTTTGACCTTCGGGCGGGCTTTCATCAGCGACC  
GAAACCGCTTTGACTGATGGCTCTTAAAAGAAGACAACCTCATCTACCACCAAAGTGTCAAAA  
TCGAAGGGCAGTCCGCTTTCCTCAATCAGCCATTGTACATTCTCGCGGTTTATAATGTAAATG  
TCGGCTTGCTTCCAAAGCGCCGATTTGCGCTCCGTTTCCGTACCGACCGCCACGGAAAAGCG  
TAGGTTCGGAGAGGTGTTCCCATTTCCGCAGTTCCTCCGGCCAAGTGTACGGGCTACACGGA  
GAGGAGCGATGACCAGTATGCGGTGTGCTTCGAAGCTGTCAAATAACAGGTCGGAAAGGGC  
GGTCAGTGTAATCGCTGTTTTGCCAAGCCCCATGTCAAGTAGGAGGCAGGATATAGGGTTTG  
CTTCAATGAAAGCCGTGGCATATTCCTGATAGTTATGAGGTTGATATTTACGAAGCACACC  
TCCAATCTGTTCTGAATCGTCTAATAACATAAACTTTGTATCCCAACCGCCGTAACATCCCATG  
CCTTGATTTCTGCAACGGTTCGGGGCTTTTCGCCTTGCCGCTTTACTTCCACAAAACCGCACTT  
TCCATCTGGAAGAAGCACAAAGGCGGTCTGGCATTCCATCGAAGCCGGGGCTTATAAACTTGG  
GTGAGATACCCCCATTGCCTTGACTGCCTCCGTGAGTTTTCGTTCCAATGTTTTCTCTCGCA  
TATAGACCTCCATTTTCCCTCATTGCCCATCTTGCCGATTCTGCCTATAATTCTACGCGGGCA  
TATTACGTATGCTCATTGCTCTTATTACTTATAAAATAAGATTTAATAGAGAGAACATCGGC  
AATATGGGCAATGGCTGTGCTTAAACCGTGGTATATTCGGGGCTTGCACATTGCCGATTAA  
GGTTGCCCAAGCCCCGACAGGCAATCATGGGCAATTGCACCATAATCATTCTGACCTCACGA  
ACACACGCTGGACGCCGTACATCGGGACAGCTTTTTTGCCTGTCTTGTGCTTCGTACTIONTCA  
CCCAGCCGCCTATTTGGTTGAGAATGCCCTCGATCTCGTAGGAGTCGGCTTTCTTAATGGATT  
CGCGCGACTTCCCGAAGCACTCGCACCAAATCTCCATCACGCAGACCTGACTCCGACGCACT  
GTACCTTTTGCCCTTGTAGGGTCTGTGTAGAGCGTATATATTCGATCCTGCGATAAATGTCC  
ATTGTGTCCAGTTTTTCAGGCAGCAGCTCTTTAAGGTACTCAGCCACCAAGCCCTCGCGGTC  
ATCGTTCTCCATAGCATCTCGCTGTTCGGCAAATGCCGCTAACGCGATATCGCCTTTTAGGAA  
CAATTCCTCACCTCGGTGTACCTAACAATGGCTTCCGCCCAAATCTGGTCAGTCTCCGTAAG  
TTCCCAAGCGTGGTATTTGCCGCCGCCAGAACTCGCACAGGCCAGAAGCGGGCGGTTGCCCG  
TGATGTCTCTTAAGAAACCGCCGTCTGAGTTGGTCGATCCCACAATGATGCATTGACGAGGG

TGGCTCTCGACGGCTCTGCCGTAAGAGGGGCGGTATTTATCGTCTGTGCGGGTGATGAACGA  
CTTCACCGTCTCCACGTCCATTTTCTTGATGCCCGCAAGTTCTCCCAGTTCGAGTAGCCAGTA  
GCCTTGCAGCTTCTCGGGCGCAGTCTTATCTTTTCATATCTGAAATTGAGAGGCTGTCTGAGTA  
CCATTGCCGACCGAGTTTTGAGAACAGGGTGGACTTCCCGATGCCCTGTTTGCCGTTTAGCA  
CAAGGATGGAGTCGTGCTTACGCCGGGGTTAATATGCGAGCGACCGCTGCCACGAGCGTT  
TTTCTGGTGACTGCTCTTGTGTAAGGCGAGTCTCCGCACCGAGATAGTCAATGAGCAGCGT  
GTCCATTCCGGGAATCCTGTCCCACGCAGGCAGGCTGTTACAGGTATTCCTGTATCGGGTGGT  
AGGCGCGGTCATCGGAAACCTTGGTGAGAGCCAGTTCATAGTTGCGAGCCGAGAAGGTGCC  
GTAACGTTTATCCACATATGCCACAAGCTGTGCAGTGTCTGCGTCACGCCAAGGCGGGTACG  
GTCGCTCCCATGGGAGGTTCTCTCCATATACTTGGTTTTGCAAGTTTGTGTGGCGGATGCCGC  
TGAGGGCGTCATCGTTGTTCAAGATAAGGAGAAGGTTGCCGAGGGTATTGCAGAGGATAACC  
ACTTTTCTCCCTTGAAGCCGCGACATCCAGTCCCTCGCTCTCGGCAAACCTCGGTCTCGGCGGC  
GGCAATGCGCTCCTCGGCAATTAGGGTGTGACCTTCTCGTCTTTTAAGGCTAACTCGTCCAT  
CGCCTTGAAACCCGCTTTATCATCAAGGTCTGTGAATTTGTGGACACGGACAAGATCAAAGG  
CGTTTAGCAGCTTGCCGCAGGCAGGGTCTGTGGCATGGTGTGAGAAAGCCATTTACCTTCA  
TACAGCACAAACGCCCGCACTTGAGTCGGCAGGGATATAATCATAACGTCCCGACATTGCAG  
AAGGCTCGTAAATGTCCGGGCAGAAATGTTGCGATTGTGTCTCTATAGAGTAGGAACGACA  
GAACGCACCGACTACGCCTTCTTTTTCGAGCGGGTTTTGCTGCTGATGGATACTGCGTTGTAT  
CACCTCGGACTGACGGCTTGATGTCGGCCAGAGAGAGCAGTCCCGCCAGTCGGATAGCTTTG  
CGAGGTATTTGTCCGGGTTGAGTTCATCACCATCAATTACTTTGAACACATACTCCCCATCAG  
ATGGCGTGGACGGCCAGTACATCAATCGCTCCGGCTCGTAGGTGGAATCATCAAAGAAATC  
CATCCCGATTTTCATCCGCCACAAGCCTTGAAAGAGCGGCGTATTTCGTCCGGCGTAACATCAC  
GGGAGAGAGGAATAACCACGCGGAGTCTTGAGTTTTGGGCGTATGACTGTGGGTGGAGTA  
GATGGCGCAGTTGTGCGGGAACAGCATCTCTACCGTGTGATAAAGCCGCTGTCCGGCGTGGT  
CGGCATCGAGGGTAATCCCTGAACGGCTCTCGACCGTGTCTTTTTGCGCCGCCCGGACTTG  
AGGTGACCGAGGACATAGCCGCCACATCCTTGGCGGTGTCACGGCGGTCTTTGGTAAACTT  
TTGATATTCAGCGACGGTTTTCTGTAGTGCGGCGGGTGACCTTGAACCGCTCGCATAACTCTTC  
AAATGTGGTCTTCTTATTAACCCATCGTTTTGACAGACGGCTGTCCCGTAGGATATTTTCAG  
GTCTCGCATTCTTCTGTGACCTCCTCCTCAAATTTGCCCTCGCCCAATTCAGGAAATTGCCA  
CGGCAGTTGTGTGCTACTTGTTCAGGTCTTGCCAAAAGCAGGGCAAGCACCGCAAGCCA  
GCACGATGAAGTGGTGATTGGAAATGAATTCGGGCGTGAGCGATTCTTCCACACATCAA  
ATTGGTCTTAATGGGTTCTATAGGCTTCGGGGTTGACCGTTAGCTGCCATAGTCGGATACCT  
CCTCACATTTGCCGTTAAAAAACGGATAGGGATATTGCGTCTGCGAGCCTTGGTGATTTCA  
CGGCTCATGCCCTCTGAGGGTGAGCCGAAAGCCCATAGCTCGTCGCATTTACCAAGCAGGAT  
AAGGGCGAAGCGAAGCCCAAGTTCTCTTTGTTTTGGATCATCATCATCCATAAATTGTGGGT  
AGTGCAGGTGCGGAGCAAGAGGAATACACCCCTTGCTGACCGCAAACCTGCAATAACCCCG  
TGCCTTCTCGACGTTTCGTTCCATATCTCCTGCAAAGGAGAGGCGATATATATTAGCGGGA  
GATACTGTTTTGCTTTTTCTCGCTTCGACTGCTGTTAAAGCCTCATAAGCCGTCGGGTCAG  
GATAACCTTCACTGTTGAATTTGTTTCATCAAGCACCTCCCTTGGTAATACTGCTCCACAAGC  
GAGCGGAGCCACTCCACCTCTTCATCAAGCTGTTTATTCTCTGATTGAAGTGCGGTTATTTGC  
GTTTCTTGCTCCTCGTTTTGTCTGCAAGAATGAACATAAGGGAAAACCAGCAGGTCACTCC  
AATCCAAATTAACACCCACGGGATTGCATCCCATATTGCCTTGCCAACCTTCTTCAGAGCCA  
CTTTGATGGCTTGCTTCTTTTCATTAGTCATTGTGCTTTACCCCTTTCCCAAGAAATAAGTTGA  
TAAATACTGCTGTCTTTGCCTGTGACCTTCGTTGTCTTGCTGATGGTTACATGACCGTCCG  
AGTGCCTGATGGCGGTCTCTTTTACTCTAAACAAACCCAGTTCATAGCCCTCTGCGTCGGA  
GCGTTGTAATCCGTGCCTTGGCGCTTGATGAGGTAACCGTCCGACGCAGCTTCTCAAACAG  
ACGATTCTGTCCGATTTCAATGCCATTACCCTTGAGGATTTTCGCCAATTCACCGATGAGGAT



TGTGCCATTGGA AACCGAAACGGCGTCGGCAAAAATAACCTTCGGCTCGTTCTTGGCAGCTT  
CCAATTGGAGACGATCCTTTGCGGCACGCTCGTCTTTAAGGGCGGTTAGCACCTTAATCCAA  
GCGTCGGGGTTCGTTTCATCATCTCCTCCAATTTGGCGGGAGTGAGATATGCACCGTGCCTGCG  
AATGGAAGGTAACACTTCATGGGTGACCCAGCGTTTAAATCTTTTGGCGTCAGGCTTGTCTG  
AGCGGAGGATGACGTTGTAAAGACCGCTCTCATTACGGCGTACATTTTCGCGGGTCTGACCA  
CCTGACACGAATTTGATTTCGGGTTCAGCTCATCGCCGTCCAAACGCTCCGCCACCTTGTTGGT  
GTCCGATAAACCAAGTACCTCGCATACATCTTTCAGCACCCAGAGCGTTTCGTACACCTTGGC  
GTA CTGTCCTTACTTCGTTCCCATCATAAGAGAACACTTGCAGTTGATTGTCCATAAATTGCC  
TCCTGTAAAATAATTATTTTCGAGAGGCTGTAAACCCCTCACCATCCACAGGACAGCAAGGGG  
CTACTTGGCAACCAACCGCTTAATCTTTTTTATAAAAATGGGCAATCATAGCCATCGGCATGG  
AGTAAAAGCCCTTCAGCCACGGCGGTGTACGGCTCATTGTTCGCAGAGAACCTTGGTGGA  
CATTTCGGGAATCAGCTTCAATGACCATTTTCATCATGGACGTGCATCACGATGTCGCAGCACC  
TTTGGCTCTGCATTGCGTAGCTGAGGATATCGCGACTGGTGGCTGCACGATGTTCTCCACA  
AATTTGGGTCCGTAGCTTTCAGCCGTTCCCACTTTTTTCGTACCGCCAATGCCCTCGTAGGTC  
ACGCAATCTGAGCCAACTGATTAGAGCCTATTCGGGGTTTTACATAAGAGAGCCGCCTGCC  
CGAAGGCAGGGTTATAAAGAGCATTCCGCTCTGCACTCCGAAGCGGATACCGTGGGTTTTCGG  
TAACCGTTCTGTCCCTGACAGCCTTTATAGCTGCTTTATCAACATCCCACCAAAGCCTGACGA  
TGTTTGGGTTGGAAGCCCGCCATGCCGTGACGAGGGTTGTAGTTCGTCTTCCAACAAACCC  
ATCTCCAATGCGCCCATCGCTTTGAGCGCGCCGACAGAACCGCCATATCCGAGGGCAAGTTC  
TGCAATTTTACCTTTTTGTGCAAGCGGACTGCCTTTGGTGACTTCCTCAATCGGGACGTGGAA  
CATCTGGCTTGC GGAGGCTTCGTAAATCTTGCCGTGGGTGGCAAAGACATCGTTGCGCCACC  
GCTCCCCGCAAGCCATGCGATGACGCGGGCTTCAATAGCCGAAAAGTTCGGCTACCACAAA  
CTTCGTGTCGGGCTTCGGAATGAATGCCGTCTTATTA ACTCCGACAGTACCTCAGGCACGG  
AGTCGTAGAGCAGTTCCAAAGCGGTA AAAATTGCCGCTTCGCACCAAAGTCCGCGCCTGTTC A  
AGGTTCGGGCAGATGGTTCTGCGGAAGATTTTGCAATTTGAATTAAGCGTCCAGCCCATCTGCC  
GGTGCGTTTTGCGCCATAAACTGGAACATAACCCCTTGCCCGACCATCTGAGCAGACAGCGT  
TTTCCATCGCCTGATATTTCTTGACCGAGGACTTCGCCAACTGCTGCCTAAGCGACAACGCCT  
GACCGAGTGGCTCCGGTGCTGTCTTCAAGAGTTCAGCGACCGCCTTTTTACCGAGGGTGTCG  
GTTTCCAAGCCGTTATCTGCAAGCCATTGCTTCATCTGCGCCACAGAGTTCGGGTTGTCGAGT  
TCGCTGATTTCTTTCATCATGCGGGTCAGTTCGCTTTGGATCGGGCGTCGGCGGAGATGGC  
GTTCTGACGAGTGT CATATCCACCATCACGCCGCGGTTCGTTGATTTCTTGGTTCGAGAGCGT  
ACTCGTTCCAGATGGAATCCGGCACAGGGAAATTTGCGAGCCGCTCCTGTATAGACATTTCT  
GCTTCCACATCACGGCGGTTATATTCCTTAAACGCCGCCCACTTGTTCGGGAGAGTGGGCAGG  
AAGGTTACGGGTGCGTTGCCCGTTGGCGGTGGTGGCGACACACGGTTTGCAGAAATAGCGG  
ATGAGTTCTTTACCTCGGTCAGCTTTTGCTTTTCCAATCCCAAACCGCACCCGCACCTTCA  
AGCGAGAGGGGCAATCCCATATACGCCGACCAGACCATAGAGCATCTCCATGATTCGGGAT  
TCAGGTATTTACCTTGCTAAATGCTGAGACGAAAAGTGGTTGTTCGGTGAAGGGGTCAAGG  
CTTATGCCCATATCCGATAAGAATCGGGAAAAGACAGACCCGCTCGAAGTTGGCGTTGAAAG  
CCCATTTTTGCACGGTATTATCCGTCAGGGCGTTCGAGGACAACGGTTGGAATACTCTCTCCA  
TCGGTGAGAGAAATCACCTGAACCTCGCCGCGTCCACGGAGTAGCCAAACAGGAGAATCT  
GAAAGTCTGTGCCTCGGCGTACTTATATACACCACACTTACTGAGGTCTGCGCTGCTGTAT  
GTTTCAATATCAATACTGAGTGTTCATAAGCCCTCCATAACGCAGAAAGGGCGGCAAGTTT  
CCTCACCGCCCTCGTGCCGTCTGTGTAATCTTTAGCTGAGGAAATCTTCATCGTCTTCCGGTG  
GCAAAGTCGTCTCGGCTCTGGTCTTGCCGCCGAGCGGGTCCCGTCCACGCAGTTTCTGAAT  
GTTATTCAGCCC GCAAGCGATACCTTTGTTGCCGTTGCTGTTGAAAGCGTAGAAATTCACGC  
TGGCACGAGCATACACACCGCTGTAAATCTGCGAGCGTTCGATAATGGTCTCGCAGGTACTG  
TCCACGATGCCGGGAGCTGTGCTACTGTTGGCATTGATGAAATAGCTGTTCGGCGTAGGCTTC

GTCGTCGGGGCGTTCTGTGTCTCCGTCTCGTAGCGGGGTTTTGAGGACAGCGAGTGCAGGTA  
CAGTTTTGCCGTTGCCTTTCAGCTTGGTTTTCGCCCTCACGGTACGCCGCTTCAATCGCCGCCT  
TAATCTTGGCGATAGTGCGGGTGTCGCTCTTGGGGATAAATGATGCTGACCGAGTATTTCCGGC  
GTACCGCCGTTAATAGACTTCGGTTCACACAGATTTGCGTAAGAGAGTCTTGCTTCACCCGT  
AATAACCTTTGTAGGGTTGGGGGCGGGGCTTTGGTTTTTGCGGGTTATTGTCTGATTAGCCAT  
TGTCTTTTACCTCCATAAAATCGTTTTTGGCAGTATTGATTGCCGGACGTTTGTCCGCCCTCCG  
GCACGAGCGTTGGTTTACCTTGCGGTTTCTCGATCAATCCGCTGAGCAGTTCGGCGAATTTG  
GCTTTGCCGAGAGCCTTTTCCATTGCGGTGATACCCATCACTTTGTGTTTATAGGGGTCGTAA  
CCCTCCGTGACTACGGCTTTAGCAACGGCATCCTCGCTGACATACTTGCGGTTGCTCTTGCCC  
TCGACAACCTTCCAACCTTGCCACAGCTTACCGCCGAGGGGCGGCTTGTAGGGCGTAATCCCT  
GATGTCGGAAGCCCAAGAGATAAGGTCATCAATCTTACCGAGGATAGATTGATTTTATCGT  
CCTCCAACAGGGGCGGGCGTTTGAATCCAACCTTTGCGAGTTCCATGTTTTCGCTCGGCGCGT  
TTTCTGCACTCGTACTTCGCCTTGCAGAATTGACACCATTCCGCCACAGTTGTAATCGCCATCA  
CCCGCATAGGCAATTTCCGGCTGTGGGTTTTAGTACTTCCCTCCGCCATTGGTAGAGCGATTCC  
TTAAAAACCGTGTGGTACTGACATTGTCACGCCTTGGCTGATAGATGGTCAATTGACACCTC  
GTTGATGTCGTAAATGCCGTCAAACAACCTCAAACGCCCCCAAGGCATAACAATTCATTTGCG  
GGTTGTCGATTGCCTCTACAAGTACTCCTTGCCCATGCTTGTAAATCCACGATGTGGAGAGTAC  
CGTCGGCGATAATGACACAGTCGCCGGTGCCGAAGCCTTCCCTGCACATATTTGGAGAAATCA  
AGCTTCTGCTCAATAAGTACTACGGGGTCCGGCACAAGTCTGCTTTGCAGTTTCTACCAGTTCC  
AGGATGTAAGAGGGCGTAGCCTGTGGCACACTCGTCCATCTCCTCCGAGTAGCGTTGCAAGGT  
TTTCGTCGGGTCTTTTACTTTGATGCAGAGTGTGTTTTTCCAGCCTGTACTCGCCAAGGGTATG  
GGCTTCCGTGCCTTCTGCGGCATAGTCGCTGCCCTTGTCCCTCGTATTGCTCACAAAGCCGTGC  
CGAGGGAGGACAGTTGAGCCATCTATGGCTTACGGAAGCAGAGAGGAGTGCAGTTTACCC  
ATCTTACCCTCCCTAAGCCCGATGGTGCTGGCTTCCCAAGCAGGGCTTCAAACCTTTGCGAG  
GGTCAATCTCCGACAGTTTCGATGCACCGTGCTTTTGAACAGATCTCTAACATCGGCTGTAT  
GACCGCTTCCGGACTTTTCCAGCGAGTACGGCTCGCACCTGCTCAAGAGTGACGGATTTTGGC  
TTTACCTTGGATTCCGATTGCGGTGCATTTACTTCTGACTTCGCATCGCCGTTTTTGTGCAAT  
AATGTCGCCAAACTATCCGCCACCGCCGTAAGTGACTGTGTAGCGCTTCGCAATTCACCGAT  
GCAGAGGTCGAGTTCATCTTGTCTATCCGGATTTCCCTCCTTTCTCGGTTGACTCATCTC  
GCTTTTGGAGTGCATTAGCTTCTTAGCGAGACGTTTGGACACGATGCTTATCGCCGTCAGA  
ATTCTGCGAGTTCCTCGTCAAGGTTCGACATCGCGCAAGTCTGTGTCTGTGTTTTTGGCCTTT  
GTTTCCATTGGTCTACCTCCTTTTCTGAGGGAGGTTTGTTCCTCACCATCCACAGGACAGC  
GAGGGGAGGTTTGGCAACCGAGGTCGAAAGTTTTTATTCACCGCCTATAATGCAGCGCAGCT  
TTTCGATGACCTTTTGTGCTTGCCTTGCAGACCGCTTGTATGGGATATGCCAATTTCCGGCGGCAT  
AATCACGCTCGGTGCGGTGAGTGTAGAAAAGGGCGTTGATGAGAGACCTCTCGTCAGGTTCT  
AAATCATCAAGGGCTGCTACAAGTTGTTTCGAGGAGCAACTTGTCTGCCACCAACTCAGCCAA  
GTCCACTGAATCAGCGACTTCGTAGCCTTCTTCGTTGAACTTGTGAGGGAAAGGTCGCCGC  
CCTCGCGGGACTTTTTCGCATGTGCGGCAGTCTTAGTGCAACGGAAGCCGTTCTCATCACGG  
CATTTTTTAGCACGTTTCTTGCCTTGTGTTCTGCCCAAAGCGGGCGTTTGTAGGCTCTGTAG  
ACTTCTTCCGTGACGGGAATTTGCTCTCCGTTGATTTGATAAAAGTATTGGTTTTCCATGATT  
TGCTCCTTTGTTTTTTCAGAATTTCTGAAATCCGCCGAGCCGTTGAATCCGCTATAAACAGGA  
CAAGACGGCAGGTGAACTCCTTGTAGGGAGTTCGGCACTGCCGTCTTGCCTTCTGGCGGAT  
TTCGGTTATTGAGTTGCTTTGGGGTATGTGGCTACGCCGACGGGGGTGTTTGTTCGTGGGTAA  
TTCTTAGCGTTCCGTCCGGGTGGCTGTAATACGGGTATACAGTCTTTGATTTGGATTTCAA  
AGATGCGGTGTCTTTGCTCACATCGCCGACACGCTTCTTGTTCAGGTTTTTACTTGGTTCA  
TGGATTGCTCCTCCTTTCTGTTGTTATCGCAAACACATAATTGACAAACACAACTATTGTGA  
TAGAATAGCAAAGGTGTAAGTAGCGTTTCCGATGTTTGTATCGCAGTTTTGCTTTTACAGTT

CAATTTTACAAAAGAGGCTTTCTCAACTCCGCACTAAAACGAACCGAAACGGACTAAACC  
GGACTTTTGCTCAGGCAGGGAGGTGTACAAAGTGATTTTTACTGAATTCGCACAGATGCTGT  
ATCCCTTTTGTGGAACGGTAAATATCAATCTGACCTTGTCTGTCGTTGGCACTTGTGGGAATATCA  
TCGAAGATACAGATGACGAGATTTGCCCTTGCTGGACAATAAGCCCGATTATCTAACAAGG  
ATTTATAACGGGGCGAAACCTTTCCGAGAAAAGACGCAGCTTTTGTGTGGGGCATTTAGA  
CAAGGTAATAATTCGAAAACACTACATATCTGGTTTGTCTGGATGATGCAATTGAAGGGCTACGCA  
CCGCACTCTCTGAAAAAGGCTTTGTGGTGGCAAAGAAATATGCAGTGGCCTCAAATGTGCT  
GATATCTTTGCAGAAATAATGACTGACTGTGCAAGTAGCACACGTCAGCGACCTATAAATAG  
AGCTAAAATCGCCGACCCGTTTGAGGGCGTTGAAGAGTGCCGAAGCGTTACTCGCTATGATTC  
CAGCCCCCACTCAGGTGGAGCCACCAGAACAACCACTACTTGAAGAGCAACCTTATATCAG  
CGAACTCTACGCAGCTTATGGTGACAAAGAGGGTGTGCGGACTTTAGCGAGGAGCACTTGC  
CCCATTACTGTGAATATTGCGAGGATATAAAAGAACGTCGCATAGACTACTTTGCAGCAGAA  
TCTATACGGCGTGGAGTCAGCGAATTATATTCAGGAGAATACGCCAGCCAGTTTGATGTATT  
AAAAGATGAGACCTTTGACGGCGTAAAAAATACCGCTCGGAAGACTTTCCCGAACGGTTAT  
GAATGTATGCTTGGCGTTATGGAACAGGCTGTGCTTATACAAGTCAAAAAGTACATACTGAG  
CCAGTCGCCAAACTGGATAAGCAACAAAATCAAGATGGGTATATGCCATTTCTTGGTGAATG  
ACAATAAGCTCAGGTGGGTGAAGAAATGAACAAAATATTAGGTTCTCAGTTTGAAGCATCTT  
TGAGAATACTACTCCTTTTAGAGGCGGTGCAAAATGAACCTTTATCAGAAGGTGCGATTGCC  
GCACTTGACTATATTACAGTCTACTCGCATGACTTTGGTATATCCGAGTCGAATTTACATGGA  
GAGAACAAATACCGCTTTGGCGAATTTGCGTCCCGCCGTGCAACATTAAGGACAGCAATCA  
AACAGCTTGTGTTGGATAGGCTGGTCATGGTAATGCTCTCATCGAGCGGGTTCCATTACAAA  
CTCAGCAGCGAAGGGGTTGATTTCTCTTCAATCTCAATACCGAGTACGCCGACATCTATTA  
TCAAACCGCAACACAGGTACTTGAATAGTTGGTATGTCTGAGCGCACACTCGGCAAATTGA  
TTAATCAGAAGTCTATTGCTTCAATTCGGGAGGATTAAGATATGGCGAAGTTTATATCGA  
AAAACCTGGTGGTAACAGGAGGTGGCAAAGAAACCTCTTCCGTCGAATTCAGCGATGGACTA  
AATTTCAATTGTGGGACCGTCAAATACAGGTAAAAGTTACATTGTTGAGAGCATTGATTTTTT  
GTTCGGGCTTGAACCGAGCAAAAACAAGCCATTCGCTTCGACCCCTCCCTCGGTTATGACT  
GCTTCACGCTATATACACGGACTCCCAATGGAACCGTTATTTTTAGCGCAAACCTTGACTCTA  
CAAAGATAAGCCTTTCAGGGACTGACCCCAATTTTGAACACAGGGAGTACAGCCTCGGTCAT  
ACTGCAAAAAACAACATCAGTAACGTATGGCTTCAGATGATGGGTATCGATGAACCGCACA  
AAATATTGCAGTCTCAGGCAGGAAAAGTGCAGCAGCTAACTCTAAGGTCATTCCTGCATATG  
TTTTTTGTGAAGCAGGATTATGTGTGCGGTACGCAATCGGTGCTTTATAACCCTGAACTCTAC  
CCGAACATGACTTCAACACCGTCTAAGGCGGCGGCTCTGTTCTGATGTCCGGCAAAGATGC  
CAGCGAATACGAAGCGAACGAAGATAAGAAAATCCGCAAGGCAAAGAGAACCGCTGTGAT  
TGAGTACATTCGAGAAACTGTTGGACGATATGCCAAGCGTGAAAGCGAGTTGTTGGAGGCA  
CGGGAGAATTTTGCTAAAAACAGCCATTATCACTTGACCGTGGGGCGAACGATTTCAATGC  
GGAAGTTGATGCAATCAACGGTGAGATTGACGAATTGCAAAGACATATAAATAGCAACATT  
GAACAAAGCCTTCTTTAATGCACGACATATATACTGGGAATAGCAAACCTTGCCGAGTGCGA  
GACCATAGCTGACCGCTTCGCGGTGCTTCGCAGCCAATATCAATCAGACATCGAGCGATTGA  
CGTTTGTGATTGACGGAACATGGCACAATCGGCTCTACCGAAAAGAGAACACTGCCCGTTT  
TGCGACAGCGAGATTAAGGCAAAGAAAACGTCTCATACTGACGCAGCACGTGCCGAAT  
TGCAACATATCCGTAGCCATCTGACCGAATTGGAGAAGGCGGAGCGGGACGTTGCAAGAGA  
AAAAGACACCGTTGAGAATAAGGTCAAAGGCTTGAAGAACAAAAACATAAAAATCGATGC  
GGAAGTATCGGCTGACCTAACCCTCGGATGACAGCATTAAAAGAGAAATTGCGACTTTTCC  
GATATATCATAGAGCTAAACAAGGAACTCGATGTCATCCAGCAGGAGGAACGTGGTTTTAG  
CTCTGAGTTATTTGAAAAGGAAACCGAAGAAGAGCCAACGGAGTTCAAGCACGATATTAAT  
AAATTCTTTGACCTCGAAATAGTGCAGGCTTTCCAAGAGAAGCTGATAGCTATATTGCAAGC

CTGTCATTATCAAGGAGCGAGTTCTGCACGTCTTAATATGGAGACATTCGACTTGGAGGTCG  
GAGGCAGACCTAAATCCATCTCAAACGGCGGTGGTTACTGTGGTTTTCTAAACACAGTAGTC  
GCACTCGCCATGATTGAGTTTTAGAGAAACAAGGCGCGTATTCGCCGGGGCTTCTCATCGT  
TGATTCACCGATGACCCAGCTTCCGAGTCTGAATATAAGGCAAACAGGACACTCTAATAT  
CTGGGTTGCTGGATTATTTGCTTTCGATTTATAAGGATGATTTGGGAAAAGACCAAACAGCA  
GCGGAGCAGATAATCATTATTGAACATAAGGACAGACTGCCAATGCTCGTTGATAGATTGGC  
TAACTCACCACACGTCAAATTATAGAGTTTACGCAGGATAAAGAACATGGAAGGTACGGC  
TTCTTGGATGGCGTGTACCAATATGAGTAAGTGCCAAAGTGCGACTCCGATCCAAGTGATTA  
TTGGCTACCACGTGAGCGAGGAACAAGGAGGAAACAAGTGAGAATCAGTTATAACAAGTT  
GTGGCATGTGATGTTGGATAAACAATGAATAAGGCTGACCTGAAACGGGCTACAGGCATC  
AGCACCGCTTCTATTGCTAAATTGGGCAAGGGTGAAAATGTTACGACCGACATACTGGTCAA  
GATATGTGAAGCCCTCGACTGTGAACCTCAGTGATATTATGGAACCTGGCACACGACGATGACC  
ACGCCAAACCGAGTAGGAGGAAAACATAATGGCAGTAACAAACGGAAACAACAACACAGC  
GAGTATCGGATTCGAACAGCAAATTTGGGCAGCTGCAGACATTTTACGCGGGAATATGGAT  
GCTGGAGAGTATAAACACGTCGTTTTGGGACTTATATTCCTTAAATATATTTTCAGATAAGTTT  
AATGAGCGGTATACCGAATTAAGGCCGACGATGATGATGTGGAGGACAAAGATGCTTATA  
CAGAAAAAACGTGTTCTTTGTTCCCTCCATCAGCACGATGGAATGTAATCTCTGAAGCGGCT  
CACACTGAGGAAATCGGCACAGTCATCGACGATGCTATGCGGGCAATTGAAAAAGAGAACA  
AACAGCTGAAGGACATCCTTCCAAAACCTACTCCCGCACCGAACTGGATAAACGCCGCCTT  
GGAAATGTGGTGGATTTGTTACCAATATTCAAATGATTGAGCATGGTGATAGCAAGGATAT  
TCTTGGTCGCGCTTATGAATATTGCCTCTCCAAGTTTGCCGAACAGGAGGGTAAACGGGCGG  
GAGAATTCTATACGCCGTCTTGTGTGGTACGGACACTCGTCGAGGTCTTACAGCCATTCAA  
GGGCGCGTTTTATGACCCTTGCTGTGGGTCCGGCGGTATGTTTCGTGCAATCCACGGACTTCGT  
CAAGAACCATGCAGGCAGCATCGGCAACCTCTCTGTCTATGGTCAGGACGCAAACCCACC  
ACCCGTAAGATGGCTTTAATGAATCTTGCGATTTCGTGGAATTGAGGCTGACCTTGGCGGATA  
CAACGCCGACACATTCCATAATGATTTACATAAAACGCTAAAAGCGGACTTTATCCTTGCTA  
ATCCTCCGTTTAAATCTATCGGATTGGAACGACGGCTCGCTGAACGACGACCCCTCGCTGGCGA  
TACGGTCTGCCGCCCGCTGGCAATGCCAACTTTGCGTGGCTTCAGCATATGATTCACCACCTT  
GCCCCAACGGTAAAATCGGCATGGTGCTTGCAAACGGTTCCTCTCGTCCCAGAGTGGTGG  
CGAGGGCGAAATCCGCAAAAAGATAGTGCAGGACGACCTCGTGGTGGGCATCATCGCCATG  
CCCACACAGTTGTTCTACACTACGCAGATTGCCGTTTCGCTGTGGTTCCTTAGCCGCAACAAG  
AAGCAAAAAGGCAAAACGCTGTTTATTGACGCCCGCAAGATGGGGACGATGGTAAATCGCC  
GTCTGCGTGAGATGACCGCCGAGGACATCGCCAAGATTGCCACAACCTTCGAGGCTTTTGAC  
GACGGGACGCTTGAAGATGTGAAGGGTATTGTGCCGCGTGACCACAGAGGAAATCTCCA  
AGCAGGATTATACCCTTACGCCGGGGCGGTATATCGGCATCGAGGAGCAGGAGGACGACGG  
CGAACCTTTTGAGGAAAAGATGGTGCGGTTGACGGGCGAATTATCCGATATGTTCAAACGCT  
CGCATGAACTGGAAGACGAAATCCGCAAAAGGCTGGGGGCGATTGGGTATGACATCTAAAC  
TTTTGATCTTTGCTTTTATGCTGATGGACGGGTCTCAGTCGCTGACTTGGATTTGGATACCT  
ACATCTCCACGGAGAATATGATTCCGAACAAGGACGGCATCACCCGCTCGGCAGGGTTGCC  
GACCGTGAACCAGACACAGGCTTATCAAGCGGATGACGTGTTGGTGTCCAATATCCGACCGT  
ACTTCCGCAAGATTTGGTTTGCCGACCGTGAAGGTGGATGCTCTAATGATGTCCTTGTGCTG  
AGGGCAAAGGATACCTGCAATCCGGGCTTCCTTACTATCTGCTTTCGGACAACAATTCTTT  
GACTACGCAACAGCGACGAGCAAAGGAACGAAAATGCCACGAGGCGACAAAGGTGCAATA  
ATGCTTTACGCCGTCCCTGACGTGCCTCTTGATACTCAGATTGGGATTGCCGACACGCTCTCC  
GCACTTGATGCTCGGATTGCTGAAAATAGAAAGATAAATCATCATTTAGCGGCTTGAACCTT  
GAGAACTGTATATTGCCTTTTCCACGCCCGCGATGGCTTCCGACAGATGCACTCGTCGGTGG  
TAAAGGCACAAACTCCGGGTAGTGAGTTGTTACCGCAAATATCTGGATTCTTCTGTCTACAG

CCAAAGGTCTGCGTTTCAGAATCCAGTTCGTGGAGCGGGGCATCAAACGGGATTTTCAAGTG  
CTTATTCATCAAATGCCTTCTTCTACCGAGATTTACACCGGTCATCAGCTTGGGGAGCAAGGA  
ATCCCTCAGTTGGGACAACCTTACGGCTCTCGACCCGATTGTTTATAACCTGCTCGTAAAGCG  
GATTGAGCAAACCGCCAAGTTGATTGTAGCTGTCCTCATCAGGAATGATGACCTTAGCGTTT  
TCCAAGGCTTCACGCTTAATGTGTCCCATCGTAGTTGCCTTGTCCGCTGCCATTGCTACGAAC  
TGTGCGAGATGGTGACAAGTCCAAGTGTAGTAAAACCACTTATCATACTTGCAGACGTAAC  
CTTGA AAAAGGTGCTGATTAAGACCACAGTCGCCGCCGACCAAAAAGTCAACGAGGAGGCTG  
CCAGACCATGAAAAAATCACGTCGCCATCGTGGACGATGTAATCCATGCGGATGTTGGGTG  
AGCAGAGTTCGCTTGACGAGTCGCACGAGCCTTGCCGCAGTTCCTTGATTTTGAGGACAGGC  
AACCCGACCTCACCTTCGGTGGGTCTGAACCGTTGCATCGCCAGACCGTTGAGGTAGTCGGC  
AATATCAAGGAGACTTTCGGTTCTCATTTCGCCGGGTATCTCCCCGCCGAATGGCTCGAAGT  
CCACGAACCAAGACTTGAAAATGGCCTGTGCCATCTGCTCTAAATGATGATTTACCGTTCT  
CCTGCCAGTAACAAACCTACACATTAGAAAGGCAGGAGAACTATGAAGGATAAACTCATA  
ACACAGATTCAGGCAAACATGGCATCGATGCTTAATGCAACGCAATTGGAGGAACTTAGAA  
GGGTTCTGACGCATGAGCTCCACGGCGTGGAATAATGAAAAAAAAGGCTTCTGAACCAAC  
GGAAGTCAAAGAGAATGGAGGATTGCTGGACGTGTTTATTGCGGCAAACGAGTAGAAGGC  
TGTAGCGAGAAGTCGCTGAAATACTACGACTCCACCGTTCGGCAAATGCTCGACAGTGTGGG  
TAAGCCCGCACGAGAAATCAGTACGGACGACCTGCGAGGATATCTGGCAAACCTTCCAGAAG  
GAGCGAGGCTCATCAAAGTGACGATAGACAATGTGCGGCGTATTTTCAGCAGTTTTTTCGG  
TTGGCTTGAGGACGAGGACTACATCTAAAAGCCCTGTACGCCGAATTCATAAAAATAAAG  
ACAGACAAGCCGATTAAGGAAACATTCAGCGACGAAAGTTTGAATTGCTTCGCGATGCCT  
GCGAGGAAATTCGTGATCTTGCGATGGTTGACCTCCTCGCATCAACGGGAATGCGCGTCGGT  
GAACTGGTCGGTTTGAACCGTGAGGATATGAACTTTTTATGAACGTGAGTGCGTAGTATTCGG  
CAAAGGTGGTAGTGAACGAGTGGTCTATTTTGATGCCCGAACCAAAAATCCATTTACTAAATT  
ACCTCAATAGCAGAGAGGACAACAACCCCGCACTGTTCTTGTGCTGACCCTGCCCCATGAA  
CGATTACTCATCGGTGGCGTGGAACACGGCTTCGAGAAATCGGCAAGCGGGCGGATATGC  
AGAGGGTTCACCCACACAAGTTTCGACGAACGCTGGCGACACGGGCAATCGACAAAGGAAT  
GCCATTGAGCAAGTACAGCGATTACTTGGTTCATGTAAAGATAGATACGACCATGCACTACG  
CAATGGTCAATCAGGCAAATGTAAGAATTTCGCATAGAAAGTACATTGGTTAG

>KB1/cDCE-4

ATGCAACCTGTCAATTCTAAGGCTCTGGCAACATAGTAAGTTCCGCCGTCATTATCTTCGTCA  
GGCTCAATGACAACCTGTATAAGGTAACCTCCATGTAGTAGTCTAATTTCTTTAATGCTGTTTCC  
ATATACACCTCCAGACAACCAGTTACCTTAGGCTGTCTATTTATTTATTAAATCCTTTACAT  
AGCAAGTACGAATTGGGTTTGTCTTGGATAAGGCAGGGAGTACTTCCAATCTGTGCCTTA  
GCATGAGACCCGCCCATTTTAAATAGTCCCGTATTTGGTGACCAGCCATTCAAATCTTCAAG  
TGAAACATTATTTGGGTTCTGGCGTATCTTCTGTTCTCTTATCGCTGGCGGTCATTTCAATT  
ACTCCTTACATTCATATAGTACCATATTCAGTACCATATGTCAATAGGTTAACGGAAGTTAA  
ACAATAAAAAAGCAGCCCCATGATGGGGGCTTTTTTAATACCGGTAAGTATGTAGACAT  
TTGACGAGGTATAATGCATATATATGTTGGCAATGTTGATAAGGGTGTGACAACGGAAACA  
CCCTGTGCTATATAATATTAGTGTAAATGGTTCTTGACGTTCTGTAAGGGATGGCAAGAGAT  
AATGTGAACGGATGGGCCAGACACTTTGGTGTCTGGCCTGTTCTTTAAGGGGGATATAATG  
CCAAGATTAGCGATTTTTATTGACGGCGGATACCTAGACAAAATTGCTGAGCATGAGTTCCA  
TATACATATTGATTACACAAAACCTTAGCGAAGAAATCCGGAAGATAATCTCCTTAAAGCGCAC  
AGGACAATATAGAGTTACTTCGCACATTTTATTACCATTGTCTTCTTACCAGGGCAATCCGC  
CAACACCTGAAGAAGCATCGCGGTTTAGCAAAAAACAATCTTTCTTTAACAACATAGGTAAA  
CTTCTCGGTTTTTCAGTTCGCGAAGGAAGATTAGCATATCGGGGTAATGATGATAAAGGGAA

ACCGATATTTGTTTCAGAAGAAGGTAGATTTACAGCTTGGTTTACTTTGCACTAATCAGTG  
GGAAACGCCAAATTACCCACGTTGTTGTAATCGCAGGGGATGGTGACTTATTACCAGCATT  
CATGTTGCAAAAGAGGAAGCTATTTTAGTTTGGTTATTCCATGGGCCTAAACTATCAAACG  
GGATGGGTATTCTACATATGATTATGATCTATGGAAAGAGGCCGATGAGAGGTATGAAATA  
GATTTGCCGTTTATGCAGAGAATTCAAAGATTGTAATTACCCTAGCAATGTTTACCCGAAGT  
AAACCATGTCGGCGGAATATCCGCCCCCGTTGAATTCAAATAGTGTGCAGGTCTGAGGCTCA  
AAAACTTAGGGCCATGCTCAGTCAAGATAACGTTCCATGCGTGATATCCTTGCGGGCTTTC  
TCCTCTGGCCATAACCACAACTGTTTAGCCGGTACTTTTCTGATATGTGTGCAATAACGGCTAT  
AGAAAAATTGTCACAATCAAATCGGTCTGGCTGGTACTGGGGAAGATTAGCCGATGCCTCTT  
TAAGTATGGGCAGCCAGTCTTCCTCGGTGAGATAGTACAGGAGTTCATCGTCAATCATAATG  
GTTTTTACATGGAGTTTGTGTAGGATACTGAAAGCTTCCTCGGCGGTCAACAAGTGGTTTC  
ATTTAATAAGCCATCCCATAGCGGCCGCTAGTAGAGTCGCAATTATGCCACCGACCCAGCCA  
AGCGTTGATACCTGGGTCTGCACCTTGATAGCTTTTTACACGCCCCGGTCAGCGGTCTTGT  
GCCTCTTTGATAGCTATTTCTCGCCGCTTGTACCCTCATCCATGTATTTTTCTACCCGGGACA  
TGGTCTCGGCCATGACCGCTACTTGAGATGATAATCTGTTTAGCTGATTGGTTTCCTCTTTAG  
TCATGGCCGTCCTCCCAAAAAGTTTACATCTTTAGTATTGATTTCTAAGGGGAGAGTGTATA  
TTGCTGAATGTATCTCAAGACAAACAAAGGCATGTACGGCATCTCATTCCGGCTGGCACCATG  
GATAACCAAAGAACCATTAAAATCAGCATTGCGTTCCAGCACATCTGCCGATTGTCCATA  
ATGCGGGGTATAAATCCCCTTGATAATCGGTTTGCTGTAGTCCAGATATATGCCGCGTAGTC  
ATAGCGGCAGTTCTTATAGAATGTTACGAAACGTTACATTCTTCCTCAGTGAGTGGTCTGG  
GTATCCAGTTGGCCAAGTAAATACGACCCTTAACCTCGGATAAAGGAATTTGTCGCGAGCCT  
TCTCCAGTAGCTTCATCTATGATCCAGCCATGGGTTCGGGTCGTATTTGACCACCTGAGACAT  
ATGCCAATAATGACACCACACTTCATAATTGCGCCGCACCCATTCTTCTGGGTCCAATATGT  
GTATTCCAGTCGACAAAGTATTTGCCAATGCCCTGAGCGGGCATGGAGTAGGTTACTCCCT  
AGTTGAATACGGTTTATGTGATAATTCATACACACCTGCTTATAATGATGGCTAGAATTTGGT  
TGTGGGGGCTGTTAGCTTTGAGGTTATGACTATTACTTGCAGCGTGATAGATTTACAATCGTA  
TCGCTGATATCAACAACGGAGTTGGCCAGTTCTACATCTACGTCATATGGATTAGATAAGTC  
ACGCTTATTGATGCGGGTAATGCGGGTTTCAACTGATATGCCCAACTCTTCATCAATAATTTG  
ATACGGGTCAAGGAGTGATATCTTGTTAAATCCCAGCCGGGTTCTCTTGTGAGATCAAGGA  
GCTTAATTTTATAGGTATAAATGGGGTCTTTGCGGATAATCAATTCCTGGTCTGCCCATGCTT  
TTAACAAATTGGCGTTTGTCTGGTTGTTATCCCAGATAGTCCGCGTAATCACTCCCCATGTAG  
CTTGTGAGGTAGTATCCTGCACATAGTCATAAGAGTAACCGGTTGCTTGGGAAAGTTTAACC  
TTACTCCCCAGTTACCGGCACCGTAGGCATATATAATATTGGCTAACTGACGGTAATTTATT  
GTCCGGGTAATAACCAACAAGGTTCTTTCTGTAACGGATCTGCTGGCCGGCGTATCCATGTGC  
ACCCAGTCGATACCAATTCAGTTGGCGGTTGTTGTCTACTTCCATGTGGCCGGCGGAAAACA  
TATTCTGGAGATTTTCCAATGCTGCTAGTATGGTGCAATTAGTAAGCGTAAGGCTAGTAGTA  
CCTCCATGTTTCGCATGTGCCTCTAACAATTGGATATGGAGATATTTGATATGCCAGTATCTCA  
TCTAGGGCTGTTTGGAGAGAGACCCATGCGCAGGTATAGCTATCAATCCATTGCTAG  
CTGGGTAAGATATCCGGTGTATTCAACGTCAGTTATCATCGCGTATCCACCCGTTCTGCCAG  
AATACCAGAGACCAAAACAGTATTATTGGCGATATCCCTTATCCATATTTGTTTGTCTGGT  
GAGTAGCGCTGACTTATCATCATCAGCTGGTAAACTAAAGGAAATAACAGGGGCTTTATTTA  
ATGATTGTTCTATCGATATTGCATGGGCATTCTCAAGTATAGATAGCAACTCGCCGCCGGTC  
GGAGCAGCATAGAACCAGAATTCTGTGACATAAAAGTTCTTTGAAGCTGATAAAGTGTCCGT  
ACAGGAACTCTGGCTTTTTCTATAGTTTGGAGAGACGCTAAAGATTTCTCCACCCAAGCAT  
CATATTGTATCCCACCCGTATATACATTGTGCCAAGCACCCTGTAATACACATCAATCACT  
ATATTGGGGAAATACAGAGTCCCATTATTATTTCCACCGCCATAAATACGTAATTTGCTGGT  
ATAGAGGGGGCTGTCAGGTATCAGTTCAGTTTTGCATTGGTGGTTAATGTATATGCTTGAC

CGGTTGCGATGCTGCCATCATATGCCTTGGTTTTCGCCTTCCCATGCGCTGGAGGGGTCATTGT  
GGCTTGAAGGTATTCGCCAACCCTGACTTATTGGGTATGCAGTTCTACCGCATATCTGCTCT  
GGGGCGGTATATGTAAGCCAACAACCTGAGATAATAGGCGTGCCAAACACTGTAGTGGGGGC  
TATGCCGCTCGGCTGAATGACCCCGGAACAATTATACTTAACTCTGGCTCACCGAAAGCGA  
GAGTTGACGGTATGCCACTTGGTAAGACGTTCTGATTTAACTTAGCTGTTCCAAATGCCAAC  
GTAGAGGCTATACCGCTGGGGGCAATGGTAAATCCGCCAAACGATAATGACGGCTCACCAA  
CTCCTGATGTACTGGAAATACCACCGGGTAGTATATTCTGGTTGAGTTTAGCCGTTCCGAAG  
GCCAACGTAGAGGCTATTCCGCTCGGCAGAATATTTTGATTTAATTTGGCAGTACCAAAGC  
AAGAGTGGAAGCTATGCCTGAGGGTGATATGGTAGCGGTAGAAGTCGCACCAGTGCCATAA  
ATAGAAATGGCATCACCCTCCATATTGTATACGTATGAGA ACTTGACCCAAATGCATCTCC  
CGAGTATGCATAAATGCCTAAGTAACCAGAAGAATCTCTTTCAATATAACCATCACTAAAAT  
AACAACTAGAAAATCACCAGCAGATACGTCTATAGATAATCCAGTAAACGTCTGCTTTGAA  
CCAGAAGTTACAGAACCAATTGTCTCGTAATCCCTATCGTCATAACTTGTCCCGACCCAGA  
AAATGTCCCAATCTTAAAACCTGTAATATTACTATATCCCAAACCTCAACCGAATTTATGA  
CACCTGTATCATTAGCAGGATTATTTAAATCAACCCACGTCTGTAATGGGGATTGCGATGTG  
CCTCTATTTGTAGCACCAGGCCCAATATCAATTACAGCCATATCAAGCCTCCATTAGTTCTGT  
GCCGGGCAGTATCTCCTTTAACCCCTGCGGAGTATTTGGCAGAGCATAACAGTCAGCGGGCAGA  
GTATTCGGGAGGGCTTAAACTCCGTA CTGGTCTTTGCATTCTCGGCACAATTGACTTTTAAAA  
GTTTGATACGTGCTTGTACCGCATCATCAAGGTCTTCAAGGGTGGCAGGCTTTGCGAACATA  
TGACAGTTAAATGGAGTATCCTGCATCTCCAGCCGATGTTCTTATCCACATAAGCCTCGTA  
AGCAGCCTTTGAAATAGTGCCATCCTTACCAGTAAGGCTGGTTAATTTCTTCTCGGTTAATTC  
ACGGGCCGGCATAACGGACACGATATCCGTCATAAAGAGGCTCACCCCTTCTCAAGGTAAAAA  
TCTACCCGGACAAATTCCTGTCCCTTTTTATTA ACTTGGGTGCTGTCAATTCTGGCGTACATT  
AGTCACCCCTAAAGTTGGAATATCTTGTGTTGACCCGTTATCCAGACTATATTTATATCTGCT  
CCATTGGGAGTAATGGGCAACCCGGTAGCAGTATCTATAATGGCAATTAGACGCGAGGTGC  
TTTCTGTCCAGTGTCTTGCCAGATAATGATATACTCGCACTGGTCACCCGTAACCGAACTGA  
AAGTGGCATCAGCGGCATCAAATACGCCCCGGTACTGATTTACCGGTAAGTGTAACAGTG  
GCCACTCTCGCACCTGAAGGTACGTCATCTAGGAAATCATGGGCGGCAAGGTCTGGGGTATA  
ATCAGCTGAATCAACTAGCGTTGCCTTAATAGTGTCAATTCAGTAGATCAATTTGTTTGGAAA  
GAAATGCCTGTTTTGCCTTTGCGTACAGTGCGTTAGCCATAATTA ACTCCTTTTAAATATATC  
TACTTCGGAATACAGTCTGTAATGTGCCCTTTATTCCAAATCCGGTAATAACAATTGCATTGG  
TTTGCCCAGGTAATAGCCTTGGGAATTGACCCGGATACGTCAGCCATAGACTCCGTGCCGTTCT  
TTTTGACTACCCAGTGTTCGGTGTCTATCTCCA ACTCGTCTGTATCAACCAGGCTGTTATCC  
CAAATTA ACTCTTCGCCGGTATCGTTGTTTTTGACGGATATCGGCCCGGATAGAGACTCAC  
AGCTGTCAGGGTATAAACC GGCAAGGCAATAGCCGAGCCACCTACAGTTATGCTTACCGCTG  
TCGGGTCTGTGTCTATATTGTCAGTCTGATCGGTTTCAGTGGTAGAGTAGCCGTAAGGATCTG  
CACAAATGAACGATATGACGCCAGACATGCTGGTCTGGGTCAAGTTTTTCAGCGTCTATCTCA  
TCCAGAGCAGCGTTGTAGTAGATAACCATGTATAAAAATCGAATACCAGTTGGCCAGTCTCTAC  
TGTAGTTAGTAGCCGTTTTATTGATGCCAATCTGGTATGAATATCTAATAGACTACTACCCAC  
AAGTACAAATTCAGTTGATATTTTGC GGGCCTCTCTTTTACCATGAGAGGCGAAAGCTCTGG  
TATCTAATTGGGTACATCACGGTTAAAAGCCGTTTGGTGTATTTTGGCTTGGGTGATGGTAA  
TTCCATAAACGCTGAGGTCAGTTCCGTTAAATGATACGCTGTTGGCCATTTAGGCACCTGCC  
AGTCTGAGTTTCCGCTCATAAGTGCGTTGGATAACCTCAGATACTTGCTCTGCAATACGGCCT  
ATGTCGGCATCTTCTCGTATTACCGCACCGTTAAAGTTCAGATTA AAAAGTTGCGCCCATGGCT  
CCTCCGATTGGCCGGCGGGAATAATAGTTTCA CCCCCATGTACCAGAGCTAAGGTAGGTGA  
GCCAATCGGTCCTGGTACTGTCCACCCAGTGCAAATCCGGGGATGTTTCCGGAGGCGGATA  
TCTCAGTAACCCAGTTGCAGCAGAGTACACTTGTGTCATGGGGCCGCTGTCATCAGAATTC

ATGGCATCGTCAACAAGTTTATTCATGCCTAAGATGGCAGCGCCACCTATAGCAACGCCAGC  
TAAACCTTGACTAACCCAACGCCTGTCATACCTTGTA

>KBTCE1/KBVC2-5

ATGACACTATACTATCAGGACGACTTTGTCAGTATTTTCAACGGTAACTGCATTGAAATCCT  
AAAAGAACTCCCCTCGAAAAGCATAGACCTCGTAATAACTGACCCGCCTTACGGTATAGATT  
TTCACGGCCGTGGCAAAGGTGCAGAAAAGATAGCCAACGATAAAGTCCTTTGACAATGTAGC  
CCAGCTGATTCAACAGGTTATCCCGGAGCTGGTCCGGCTTCTGAAGGATGATGCCGAAATCT  
ACTGGTTCTGCTCAGGTGGTAGCCAGAAGCCTCTTATAGCTCAGGTCTGGCTGGAATTCATA  
AAACTCAAACCACAGGTAGTCGTTAAGAACCTCATAATCTGGGATAAGTTATACCCCGGCCT  
CGGCTGGGACTGGCGCTTCCAGTATGAAACCATCTTTCAACTCTATAAGGGCAAAGGCATCA  
AATCAGAAGGCCACTGCCGGGGTAATGTGATATCCGCCCCGTAAGTAATACCCAAATTCCG  
CGAACACCCCACTCCCAAAGTCCGGATATCATAGAGAAGCTTTTGCTACCCAAATCAAAGC  
CCGGTGATGTTATACTCGACCCTTTCCTGGGCGGTGGTACAACAGCCGCGGTTGCCAAGAAA  
CATGGCCGTCACTGCATTGGAATAGAATAATAGACAAATACTGCGAGTTTGCAGCCGAAA  
GATGCCGGGGCATAACATAAATAATTTAATGATTAACCCCAAGACGATTGCCAAGGTGTT  
TAAGGCGTTCGCCAACATCTTCCATTTCTTCGCCAAGGTCATCCTATGATCTTCTGTTCCCTT  
GAAAATAAAATATAAAATAACAACCTGCTACTGTCAATAAAGCGGCGATTATCACAATGTGC  
CCAAGAACAAAATTCCAAAAACCTCACCCTGCGATTAGCGATAAAAACCGTAGCAACAA  
CGAAAATATGCAAGCAAGAATAGTCGCAATTGATAGATGAATACGTCTTGTTAAGACCAG  
AACTGACGGAATAGCAATAACAAGGATATAAAGACCAATCCACCACCACAACATACTGTTA  
TCCTCCCTTTAGAGCTTTTTAGATTATCCGCCAAGAGGCATAGTTACGCAATAAGTTTTGTTA  
TATTTATAAATTTGAGGCAGTTATGCCATATAAGCTACCGCATCCATGTGCCACCCCGGGT  
GTCCGGAACCTAACTCTAAAAGATACTGCCCCATCATCATCATGAGCAACAAGGGGTACCC  
CCTCAAGAACAGTTAAAGAAATCCCAATACGATAAGGACAGAGGCAGTGCTTCCAAGCGAG  
GGTATGGGAGGCAATGGCAAGCGATACGTATATGCAAATTGAAACAAGACCCCTATGCTC  
TGATTGTTTGGGGGCGGGGTTGGTGGTGGCGGCCACTGATGTAGACCACATAGATGGTAATG  
TACACAACCTTGTCAGTGAATAACCTTCGTTCCCTCTGCCACGCCTGTCATAGCCGCAAGACT  
ATTAGAGAAAACCTACGGATTTGGAAATAAACCTCGATAATCTAAATGTAGAACCACACAGG  
GGCAGGGGGAGTCAATTCTCTACAGCTTAAAACACGGAGACCGCAGGCCGAACCTTTCGCGC  
AGAATTCGGGAAATTCGAAAATCGGAAATGAAATATGACAACAAGAGGTAGAAAACCCA  
AACCGACTAAAATACACGAGTTAAACGGCAATCCTTCTCGTCTCAATTTGGGAAAAAGAAA  
AGAGAAGGAAATCAAACCATCTACTGGTGCGCCACTTGTCCATCATGGCTTGATACCGAAG  
CAAACGAGAATGGAAAAGAATTGTTCCGGAACCTTGCCAAATTGGGCGTTATTACCATGATT  
GATAGAGCAGCCTTGGCTGGTTATTGCGTAGCGTACAGCCGATGGCGTACTGCCGAAGAAG  
AATTGGGCAAGGGCTTTACCTACGAATATTATGATTCAAAAACGTTTCAACTCAAGCGTACT  
GTAAAGCCAGAAGTGCAAATTGCCCGTAACTCGCTCAATCAAGTCAAGGCGTTCTGCTCTGA  
ATTCGGATTGACGCCTTCCCTCGCGCAGCAGACTAGTACTGCCGGGTGAACCGAAGGACGAA  
GACCCTGTAGACAAAATGTTAAAAGAGGCTGGCTTATAGATGAATGATTATCAATCAAGAC  
GCGGTAAACAGGGCACTCACATTTATAGAGAACCTGAAACATACCAAGGGAGAATGGGCAG  
GCCAGCCATTCAAACCTCATGGCATGGCAAAAAGATATAGTAACTCGGCTCTTTGGAACCTT  
AACCTGATGGCACAAGGCAGTATCGTACATGCTATATAGAAGTACCCGAAAAAATGGAA  
AATCAACTTTGGCTGCTGCTATTGCCAATTACCTCTTGTGTTGCTGACGGTGAAGCCGGTGCTG  
AAATCTACTCGGCTGCAGCTGACCGGGGACAGGCTTCCCTGGTATTTAATGAAGCCGCTCAC  
ATGGTTTCGCACCCACCCTGCACTTCTATCCCGGTCTAAAGTGCTAGACAGTGTTAAACGCAT  
AATCATACCCAGAAACAACCTCGTTCTATCAAACCCTCTCAGCTGAAGCATATACCAAGCATG  
GTCTTAATGCTCACGGTATCATATTTGACGAACTGCACACTCAGAAAAATAGGGAGCTCTGG



GATGTACTCACTACTTCAGGTGGTACCAGACGGCAACCATTAACAGTCGCCATTACCACTGC  
TGGAGTTGACCGCAATAGCATCTGCTGGGAACTACATGACTACGCCCAGAAGATATTAAGTG  
GAATAGTTGAAGACGATACATTCCTGCCAGTTATCTATGCGGCAACTGACGATGACAATTGG  
GAAGACGAGTCTGTCTGGTACAAAGCAAACCCGGGGCTTGGTGAATTCGCTCTATTGATGA  
AATGAAGCAGATGTACCGGCGGGCAAAGAAACCCAGCCCTTGAAATGACCTTTCGCCAA  
CTCTATCTGAACCAGTGGGTATCATCATACGAGCGTTGGCTCCCTATGGATAAATGGGACAC  
ATGCGGTGCGCCCTTTGCCCTGAAAGAATTGGACGGGCAGGATTGTTATGCTGGGTTAGATC  
TGGCCAGTACCACAGACCTGACCGCTCTAGTCCTAGTATTCCCGAATGGAGAAGGCGGATTT  
CAAGTCATACCGCACTTCTGGATACCTCTTGATAACATCCATGAGGCGGCCAAACGCGACAG  
GGTTCCTATCCGCTATGGTTAAAACAGGGATTAATCCATGCAACAGCCGGCAACATCATCG  
ACTACACTGCCGTTGAAGCCACTATTGACGAGTTGGCAGAGATATAACCACATCAGAGAAATT  
GCCTTTGATAACTGGAACGCCTGCCGGCTAAGCCAGGACCTTACGGATAAAGGGCTATACCAT  
GGTCCCTTTCTCTCAGAGCGTTAAAAACATGTCACCGCCCACCAAAGAATTAATGAACATCA  
CTCTGAGCGGAAAACCTTAAACACGGCGGGCATCCAGTGTTCGCTGGAATGCAGACAATAT  
GATGGTCTATCGAGACTCTAACGATAACCTCAAGCCTAACAAACAAAAAGCCACTGGGAGA  
ATAGACGGCATGGTTGCACTAATCATGGCCCTCGATAGAGCAATTAACACGAAAATATTAC  
GCCTCACTCAGTCTATGAAAATCGTGGCGTCATTTCAATTTGACCTTTAACCACTGACTATTAT  
CCCCAGGAGGACTATATGGCTAACCTATATTCAGGGTAAAACAGCTATTGTCTGGTATAAC  
CCGCCGCTCTGAAGGCGTAAACATCACCGACCCACGATATTGGAACCATTATGCTATGGCAT  
ACTCCGGAGTGAACGTCACAGAGCAAACCTCCCTAAGAGTACAGCCGTCTGGTCATCTGTA  
AGGCTCTTGTCGTGGACATTGGCAGGACTACCTCTCGTTGTGTACCAGCGTATGGAACGAGG  
TAAACAAAGAGCTGGGGGTATTAATCTTCATAAGCTTCTCCACGATAGCCCCAACCCCGAAC  
AAACCTCTTTCACATTCCGTTCCCTTACTTCAAACCTCACCTACTACTCTGGGGCAATGGTTATG  
CAGAAATTGAATTTGATAACTGGGGTAATCCGGTGGGCCTCTGGCCTATAACCACCCTGGCAT  
TGTGAACCGTCTCGAACACAATCAAAGAAGTGTATTACAAAGTCACCTTACCGGATGGACA  
AATTAATAATATACCTCCATACCGAATGCTCCATTTTATGGGATTGACTACTGATGGAGTAC  
ATGGTTTGTCCCCATCGCATATGCCAGAGAAGCTATCGGGCTTTCACTTTCAGCAGAGGAA  
TTCGGTTCAAGGTTTTTTGGGCAAGGGACTAATATCGGTGGATTTTTTACCCACCCTGGTCAA  
CTAAACGATAAGACCCGAGCTAACCTGACAAAAACCCCTCGCTGAAGGTTATGAAGGTTTATC  
TAAAGCCCACAGAGCTATTTTACTTGAGGAGGGTATGAAATTTGAAAAAATTGGTATCCCTC  
CTGAAGATGCACAGTTTTCTTGAGCTCAGGCAATTTAGGTAACCGATATCGCTCGAATATTC  
AACGTACCTCCTCACATGATAGGAGACCTCTCAAAGGCAACATTCTCAAACATCGAGCATCA  
GGCCATAGAATTTGTGGTTCACACCATGAGGCCGTGGTTCGTGAATTGGGAACAGGAAATCA  
ACCGCAAGCTCATGTGGACGCTCGGCCGATGATTACTTCGCTGAATTCGTAGTTGACGGCCTC  
CTGCGGGGGGATACAAAGAGCCGCTACGAGTCCTACGCTATCGGCAGACAATGGGGCTGGT  
TATCTGCAAACGATATCCGGTCACTTGAAAATATGAACCCGATTAAGGGTGGAGATGAATAC  
CTTGTCCCCTTGAATATGATAACCAGCTGGCACGCCATTAAGAGCCTGATCAGAAAACAAG  
TAACAATCGTCCGTACTTGCGGCCGTCATCTCTCAGATTGCTGAGCGAGAAAACAATCAAAC  
TCGCACGAGCAGTTAAAAAATACTCTGGCCAAACCCCTGACTCAATGGATAGACGACTACTAC  
CGAGACTTGCCAGATTACATCGCGGTGAAATTTGCATGCAGTGGACTTAGACTACCAGAGGA  
ATATGTCAGTGAATTCACCCGTCGGTATGTTGAAGATTCTAAAAGCCAGATTACCACGGCCA  
CTGAGACTAATTCTTTAGCAATGTTAATTGACACATGGAAGATAAACAGATGCCAAGTTATA  
ACAAACACCGAAACAGCATTATTGGAGGATTGGTATGCCTAAAACCTAAACCCGAATATGTA  
ACCCGTAGTTACGATGTAACCGAACTCAGGGCAGAGGCTGACTCCGAAGGCACTCCCAAGA  
TTAAAGGCCATGCCGCTGTCTTTAACAACAAGCGTTGCCTTAGTGGGATTTTCGCGAGCAA  
ATTCTGCCTGGCGCATTTCGCGAAAACAATTACGAAATCAGATATTCGAGCACTCTGGAATCA  
TGACCCAAACTATGTAAGTGGGAGAAATAAGAGCGATACTCTCCGTTTAGTCGAGGATGAA

AAAGGCCTTTCAATTGAAATTGACCCGCCGGATACTCAGTGGGCCAGGGATCTAATGGTATC  
CATCAAACGCGGTGACGTCTCGCAAATGTCATTCGGATTCCATGTGATTAAGACCACTGGG  
ATAATGATAACAGCCTCCGAACACTGGTTGAGGTAGAACTGTTTGATGTGTCAACGGTGACT  
TACCCTGCATATCCTCAGACAGATGTATCTGTCCGGTCAGCCCTGACAGAAGCAGGCATAGA  
CTATAACAACCTGTCTACCATCATCACCCGAACCAGCCATCAAATACCCCTCACCCAACTG  
ATTATGACAACCTTGAATACTGCTATTAACGTACTAAGGAGTTATTTGCCCAAAGAGGAACAT  
CCGGTTCAACCGGGCTCTCGCACTGACGGGTGTGTGGCTGAGGTGGAATACTCCGCCGGCA  
ATTAGAACTCGTAAAGTACGGATAGATATTAACCTAAATTAAGGAGAATACTCAAATGA  
CCAATGTTGAAACCCTAAACAAACGCAAGGCTGAATTGATTGCTCAATCTGAAGCCCTATTA  
GCTCTGGCAACTAAAGAAACCCGGGGATTGACCGACAAGGAACGGGAAGACGCTGATAAGC  
TAATGGGTGACATCAAATCCTTGGGTGATCTCATTACCCGCACTGTGGAACCTCAGCAAATG  
GAGATGTCTGTCGGTAAATCTGACAACAAACCCACCAATGAGACTGGATTCCGTAACCTCGG  
CGAGTTCATTCAGGCAGCCATCGCCAATCCTCGTGATTCTCGCCTTACCCGAGCCCAGACCA  
CGGGTGCGGCTGCTGACGGTGGCGTACTTGTACCTCCGCAGTATCTAGATGAACTTCTGGCA  
GTCAAGCCCGCGGATGGTATTTTCCGCCCTCGTGCCCGGGTTATCCCTGCTGACAGTGCCCA  
GCCTGATGCATCAATATCCATGCCTGCCATTGACCACTCCGGTTCTTACGGCGTTTATGGGGG  
TGTAAGTGTGAGCTGGATATCTGAAGGTGGCACTAAACCAGAACTGGCATGAAATTCAAA  
GAAATCACCTCAACCCAGCGAAGTCGCTGCGTATATTCCGGTAACTGATCGCTTGTGAG  
GAATGCGCCCAAGGTTTCTGCTACTCTGACTGGTATGCTCAGATCAGCCATTATCGGTAGCG  
AAGACTATGCTTTCTTGCGCGGTAATGGTGTAGGAAAACCCACCGGAATTATCGGGCATGCT  
TCCACCAAGACTATTACCCGTACCACCAGTAGTGATGTTGTGTTGCTGATATCCGTAATATG  
TTCGCTGCCTGTCTTTTTGGTGGCCGCTATCTTTGGATTGCCTCTCAGACAATCCTGCCTAAA  
CTGATGACCATGAAAGATGAGGCGAACAACCTCATCTGGCTGCCGAATGCAGTTGATGGAC  
TACCCGGCAGTCTGCTCGGCATCCCTGTATTTATTAACCCTCGCAGTCCGGTCTTGGTAGTG  
CGGGAGACCTCGTACTGGTGGACCTGGAATATTACCTGATTAAGGATGGATTCCGGCATAGCT  
GTTGAGGCTAGCAATGCCCCCTTGTTTACCAGCAACAAAACCGTCATCAAGGCTTACCGAAC  
TGTGGATGGACAACCGTGGCTTACTGCCCTGTCCAGTTGGAGGATGGAACCTACCACTGTGA  
GCCCCTTTGTAGTACTCCAATAAAACAACAACACTGGGGGTGGAATTACCGCCCCCAGTGAC  
TAACAAAGAGAGGAATTGAATGAGGTTAACTGATAAAACCAAAAATTGATATTGGTCTGGTA  
CCCCAGGCTCTTAATAACACCAATGCAACTGGTGCTTATTACAAATTAAGCGGGTACGGTCT  
GGTGCTGGTTTTACTGGTAGTAGGTGCAATGGCAGCCACTAAAACCGCTATCGTTGAATTAT  
TGCAAGCTAAATCTGCTACAGGCACTGATGCCAAAGGATACCGACCACTGCAGGTCAGTT  
GGCCAAGGCTACAATCACAGCTAACACCGAGGTAGTAGCCGGCACCATAGACCTGGCATCG  
GTCGCAAATACTGATGTTATTACCATCAACGGCGTTAGTTTTACTAAGGCGGCCGCTACCGA  
TACTACTAAACAAGAATTTGCAGATGCGGCAGGGCTGGTAGCTTGTATCAACCATGCCACCT  
ATGGCGTACCTGGGGTAACTGCCAGTGCGGCAAGTGCAGTAGTCACTGTCACAGCCACTAAC  
CCGGGAGATACTCTGGTAACTCTGGATAAAACAGAGAATGCCGGTACTGTTACCCTGGCAAC  
TACAAAAGCCATCGCCTATGTTGAAGTGAATACCGACGGTCTCGACCATAACAATGGATTCA  
TTTATGTAGCTGCGAAAGTCACAACCACAGCTAACACTGTGGCCTCTATTGCCACAATCCGG  
GGAGATGCTGAGGTTACACCTACCCAGGTTGTCTCAGCCTCTGCCCACTATTAAGCTTAATC  
GCCGGGGGGTGGCAATTCCTTCTACTCCCCGGCGGGAGTCAATCATGCATAAAAATATTCTG  
TTTGAAACAACCAACCTTTATCCAGATGAACTGCAATGCTGGTGCACATCAGTATCAAGCG  
AGGTATTAAGATGGCCTTAAAAATAATAACTGCCCCACCGTAGAACCTGTGAATTTGGCA  
GAGACCAAAAATACACCTCAGAGTCGACAGTTCAACCGAAGACAATTATATAAATTCCTGA  
TTAAATCCGCCCAGCAAGCAGTAGAAAACCTCACTGGTTCGAGCACTCATCACCCAGACGTTA  
GAATATCTAATCAGCAATTGGCCAAACCATGAAATCAAGCTTCCTCGCGCGCCTTTACAATC  
GGTAACCAATATTAATAACACCGACAGTGCAGGGAATGAATATATACTTGACGTCTCAAAT

ACGTCGTAAACCCTGATACCGAACCGGGACTAATCGTACCGGCTATCGGTTACAGCTGGCCA  
TCAATTAGTCTGAGACCCACTGGTGCTATCACCATCAACTATATTGCCGGATATCCTCCATCA  
AATAGTGAACCTCCTGACTATCAGGCAAACGTACCTGCTGGCCTTAAACATGCAATATTGCT  
ACTGGTGGGGCACTGGTATGAGCAACGCCAACCAATCAACATTGGCACCTCGGTAACCTCAA  
ATACCGTTACCCGTCAAATGGCTCTGCGATTCATATAGGGTTCATTACTGGGGATTTGAGGC  
ATGACATGGACATAGGCAAATTTAATCATCGAATAACTATTGAAAAACCCACCACGAACCA  
AGATGCAGCTGGAGGAATTACTCAGACATGGGCGGCTTTTGCCACTGTTTGGGCTTCGATTG  
AACCACTCGCTGGCCATCGGCTATTCCAGTCTAAGCAAGTAAATGCTGATGTTACCGGGGTT  
ATCAATATGCGCTATCTAGCAGGTGTAGAACCCAATATGCGTGTTAAATACGGCAGTCGGAT  
ACTTACCATTATCTCCATAATAAACACCAAAGAGCATAATATTGAACTCCAGTTGCTTTATA  
AAGAGGCCCTCGATTAAATGCAAATAAAATTAGAGGGACAAGCAGAATTACAACAGACTAT  
TTTAAACTGTCAAATCCGTACAATCCGATAAAGTAGAGCCGATTCTCTTTGATGCAGCCA  
AAATGGTTAAAACCGAAATTAATCTCGGGTACCGATAGATACTGGACGATTGAAAAAAGC  
GGTCATCGCCAAGAAGCTGAAACGACGTGATAATTATAAACCGGCCCCATCTATTGCTGGCA  
TCGACCGCAAGAAAGCCCCACATGCCCATATTGTGGAGTTTGAAGCGCTGGCAGGTACGC  
CAAAAAAGGGAAACATAAAGGCCGTTATTTTGGCCCTATGCCAGCCAAGCCTTACTTTTCGTC  
CGGCTTGGGATACAACCAGAGACAAAGCCCTTAATCAGATAAAGACCGGCCCTGGAAAAACA  
GATAGAGAGTGTCCCAAATGAGCTTTGAAACATCGTTTGTGACATGGCTAAAAGCCAACGT  
ATCGCTTGTTACTAACCGCATATATGCGGTTATTGCCCCCAAGACATTACTCAACCTTACTT  
GGTATACACCCTCATATCCGCACCCAGAGCATATTCGCACTCTGGTGTCTCTGGAATAGTTG  
AAGCCCGATATCAAATAAACATTTGTACCGACTCCTATGCAACCACCAAGAGTATTGCCAAG  
CAGTTACGGGATGCTCTAAGTGGTTACCGCGGGGCTATTGGTACAGAGATTGTGTATTCAGC  
TTTCTGTGACACCGAATTGGACAGTCATGATGACAACCTCAGAATTATACGTCAGTATCAGTG  
ATTACATGATTTTCATATAAAGAGTAGAAAGGAGTTAACACAATGGTAGAGGCAATAAAGGC  
TTATGGTACTACCCTTGCTCGGGCTGGCAACACCATCGCCGAATTGACTGGCATTAAATGGCC  
CAGCCATGTCAGCAGACACAATTGAGGTAACCTCATCATCAATCTGAGAATGGGTTTCAGGGA  
GTATATTCAAGGGCTGAAAGATGGAGGCGAAATATCGCTCGAGGGAAGCTTTATCCCTGGG  
GATACGAACGGACAAGTTGGTTTTGATATCCGACTTTAACGAAGGCAATTCACAAACATTTGT  
AATTACATTCCCTGGCAACATCGCGACCTGGTCTTTTTCTGGTATCGTCACCAAGATAGAAA  
ACCAAGCGCCATTTGATGGCAAATTAGCATTTAATGCTGCCGTTAAAATAACCGGCAAACCT  
ACCCTCGGAATAAGTATATCTGATGGATTGACCACCCCGTATTTTGCTATATCGGAAAGCGC  
AGTAATTACACCTGTCCCAGCCGAGATAAATACACCTATGTAGCTACTGTATTGAATGGTA  
TAACTTCGGTCACAGTCACACCTACCGCCTTAACCGGGGTAATAACAATCAATGGTAACGTG  
GTTGCTACTGGTATTGCATCCAGCGCGATAACTTTGGGTGCAGCTGGCAGCGTAACCGTTAT  
TACTATCGTAGTAACTGAGACCGGCAAGGCCCCCAAGACTTACACAATCTATCTCAGCAGAG  
CGAGTTAAGGATAAAATTATGACTGAAATAGTAAAGGGTACACCTATTACCCTGGATAAACT  
CCGTAACCTGCGGCTAGATTTAAATGCCATGGCTTTATTTGAAGAAGCTACCGGTAAGAGTG  
TGTTTAAAATCGGCTCGGATATGTCTGCTCGTGATTTACGAGCGCTACTCTGGGCTTGCCTCC  
GCTATGAGGACAAGAACCTTACGTTGGAGTCTGTGGGAGGAATGGTTACTCCCCAAAATTTG  
GCAGAGATTAACACTCGGTTAGTGGCAGCCTTCACCGCTGCTATGCCCCAAGTGGAAGTGA  
AGTAAGCCAGGGGGAAGCTCCAAGCCGTTAGTCTGGCTGGAATTGTGGGCCACGGCCCCGCT  
ATGACCTCCATCTTACAGAAGACCAGTTCTGGCGGCTAACATTGAAGGAATACGCTGCTCTA  
CTAAAGCACCACCGCATCAACATGGAATGGCAGGATTACCGGGCAGGTCTAATATGCTCAG  
TCTTAGCAAACATTAATCGAGACCCCAAAAACATAACCAAACCCTACACTCCAGCTGATTTT  
ATGCCTCAAAAAAATCCGACGAAAATGACACCTGAGCAGATGCTTGCTCAAATTAACCTCTT  
GAATACCGTATATAACGGGAACGAGGTCTAAATTATGGCCAGTGAAATAGCTAACTTATTCC  
TCACTTTAAGCGCCAATACCACTGATTTGCTGATAAAATGCAGGGCGTCGATAAATCCCTC

GGTAAACTCCAACGCTCAGTTGATTCTACTGGTCAGAATTTCCAGAAACTGGGACTCAAATT  
TGCAGCTGTCGGCGGAGCTATGCTTGGTTCGCTTGGCTTACTGGTAGATAAATACTCTGAAG  
CTGGCGATGAGATAGCCAAAATGTCAAACGAACCGGTTTCGGTGCTGAATCTCTTTCAGAG  
TTGAAATACGCGGCGGGTATGAGTGGTGCCAGTCTAGATGACCTTCAAACAGCTACCAAAA  
AAATGAGTAAGGCCATCATAGATGCCAATAGCGGGTCCAAGGCCATGATAGATAATTTTGA  
CGCCCTTGGTTTGAATGTTACCGCCATCAGGGATATGGCACCAGAAGAGCAGTTCTGGACTA  
TCGCTTACGCCTTAGCCGATATGGAAGACCAGACCTTGAACAACAACACTCGCACAGGATTTG  
TTTGGTAAATCAGGCACTAACATGCTGCCTCTACTCGCTGAAGGTCAGGCAGGCATTGCTTC  
TCTACGGCAAGAAGCCACGAACATAACGTGGTATACAGCGATGAGTCAGCAGCTGCGGCT  
GAGAAATTTTCAGGATAGTAAAGAACGCCTGACAACCTGCCATGCAAGGCATTGGGGCAACTA  
TCGCCGAAACGGTCATGCCAAAATCACCGAACTTATAAACTCTCTAACCGAAAACTAAA  
ACCTGCAATGGCATGGTTATCCGAACATCCCGAAATGGTTGATGCCTTTGTAAATTTGGAG  
CTATCTTCTTAGCTGGTGGAACATTAATGATTGGTATAGCACAAGCACTAAAAGCTTTTAAA  
CTGATACGCACAGCTGTAATGGGGGTTTCAGCTGCTATGGCAATCTTACAAGGTATGACAGG  
CGTTGGGTTAGTCAAGGTTTTAGCTGGCGTTGCTATAGGTGGCGCTGCCATCTTAGGCATGA  
ATAAACTTGTGACGATGCCATGAATTTCTGATGACAGCGGCCCATGACACAAGTGTACTCT  
GCTGCAACTGGGGTACTGAGATATCCGCCTCCGGAAACATCCCCGGATTTGCACTGGGTGG  
GACAGTACCAGGACCGATTGGCTCACCTACCTTAGCTCTGGTACATGGGGGTGAAACTATTA  
TTCCCGCCGGCCAATCCGGAGGAGCCATGGGCGCAACTTTTAATCTGAACTTTAACGGTGCG  
GTAATACGAGAAGATGCCGACATAGGCCGTATTGCAGAGCAAGTATCTGAGGTTATCCAAC  
GCACTTATGAGCGGAAACTCAGACTGGCAGGTGCCTAAATGGCCAACAGCGTATCATTTAAC  
GGAAGTACCTCAGCGTTTATGGAATTACCATCACCCAAGCCAAAATACACCAAACGGCTTT  
TAACCGTGATGTGACCCAATTAGATACCAGAGCTTTTCGCCTCTCATGGTAAAAGAGAGGCC  
GCAAAATATCAACTGAATTTGTAAGTGTGGGTAGTAGTCTATTAGATATTCATACCAGATTG  
GCATCAATAAAACGGCTACTAACTACAGTAGAGACTGGCCAACCTGGTATTTCGATTTTATA  
TGGTATCTACTACAACGCTGCTCTGGATGAGATAGACGCTGAAAACCTTGACCCAGACCAGCA  
TGCTGGCGTCATATCGTTCATTTGTGCAGATCCTTACGGCTACTCTACCCTGAAACCGATC  
AGACTGACAATATAGACACAGACCCGACAGCGGTAAGCATAACTGTAGGTGGCTCGGCTAT  
TGCCTTGCCGGTTTATACCCTGACAGCTGGTGAAGTCTCTATCCGGGCGGATATCCGTCAAAA  
ACAACGATACCGGCGAAGAGTTAATTTGGGATAACAGCCTGGTTGATACAGACGAGTTGGA  
GATAGACACCGAACACTGGGTAGTCAAAAAGAACGGCACGGAGTCTATGGCTGACGTATCC  
GGTCAATTTCCAAGGCTATTACCTGGGCAACCAATGCAATTGTTATTACCGGATTTGGAAT  
AAAGGGCACATTACAGACTGTATTCCGAAGTAGATATATTTAAAAGGAGTTAATTATGGCTA  
ACGCACTGTACGCAAAGGCAAAACAGGCATTTCTTTCCAACAAATTGATCTACTGAATGAC  
ACTATTAAGGCAACGCTAGTTGATTGACTGACTATACCCCGGACCTTGCTAACCATGATTT  
CATTGATGATGTACCTGCTGGGGCAAGAGTGGCTACGGTTACATTGTCCGGCAAATTCGTAA  
CAGGTGGTGTGTTTATGCTGCAGATGTTACCGCCAGTGCGGTCACAGGAGACCAGTGCGAG  
TACATCATTATCTGGCAAGACACCGGGACAGAAAGCACCTCACGTCTGATTGCGATTATAGA  
TACCGCTACCGGTCTGCCATTACTCCCAATGGGGCAAAATATAAATATAGTCTGGGATAACG  
ACGCAAGTAAAATATTCGCTCTTTAAGGGGGGTGATGTATGTACGCAATTATTGACAGCAC  
CCAAATAAATAAAAAGGGGCAGGAGTTTGTCCGGGTAGACTTCTGTCTGGAAAAAGGTGAG  
CCTCTGTATGCTGGATATCATGTCCGTGTGCCGGCCGTGAATTAACCGAGAAGGAAATGAC  
CGGGCTGACCGGTAAAGACGGGGCAATCTCAAAGGCTGACTATGAGGCTTTTGTAGATAAA  
AACATAGGCTGGGAGATGAAGGATACCCCGTTTAATTGCCACTTTTTCGCTAAGCCTGCCAC  
TCTTGAAGACCTCGATGATGCGGTACAGGCACGTATAAAGCTACTGAAAGCTAACTGTGCCG  
AGAATGAAAAGACTGGCTGGGAGTTTAAACCTGCACGGCAACTCTGTCCGCTTACTGTATGT  
TCTGCCAAGTACTCCAAGGCGAGAAGGAGATAATGCCTGGTACAGAATAATGGAGGCTT

GATATGAGCTTAATTGATATCGGCATTGCAGCTATCAATCGAGCGGGTAGCCTAACTTATAG  
TCTGACTATTCTGGAGGCTTCCAAACCCGCTAACGACACCGGAATCCTAGATGTTATTGAAG  
TTTGGTTCAGTTAAGCGCTTCAGGTGTTAAAGTAGGAACTTTTTATGGTCTGGTACAAGTT  
ATACAGGGAGAGATTATGAACTATAGGGTCAGTAGCTTCTGGGGCAAAGCGAACATTTAC  
AGGTTTATCTATAGATGTAACACAGGAGATTTAATAGGAGTTTATTATTCAGGGGGCCGTC  
TGGAGATTGATACCTCTGGGGGTTCTTCCCTTATGTATAGTAGCGGAGATGCTTTCGGCAGT  
ACTAAAACCTATAGTTCTGAGAGTTTCCCGATATCTCTTTATGGCACTGGTGCAACTTCTGCC  
GCAACCATTTCTCCATCAGCTATAGCACCCACTCTTGCTTTTGGCACTGCAAAGTTAAACCAA  
AACATTGTACCTTCAGGAATTTCTGCCGGTCTTATTTTCGGAACGGTTAATCTAAACCTGAAC  
ATTCTACCCTCTGGAATTGCCAGCACTTTGGGCATTGGCGCACCTATCATATCATTGGTGGG  
TTTAGTATTGCGCCAGCGGTATAGCTTCTACACTAGTCTTTGGTATAGCTAACTTAACCAG  
AACATCTTGCCATCTGGTATAGCATCAGGAATTACTTTTCGGTAAACCTGAGCTTAGTATCATT  
GTATCAGGCGTTATAAGACCCAGTGGCATAACCATCTGGTGTGGTATTTGGCACGCCTATTCT  
CTCGGCCCGCAGGCCTGCATATACCGCCCCAAAGCAGATATGTAGTTGAACTGCATAATCCGA  
TAACTCAGGGCTGGCGAATACCTTCAAGCCACAATGACTCCTCCAGCGCATGGGAAGGCGA  
AACCAAGGCATATGATGGCAGCATCGCAACCGGTCAAGCATATACATTAACCACCAATGCA  
AAACTGGAAGTACCTGCCAGCCCGTTATACACAAGTAAAATCAGAATTTATGGCGGTGG  
AAATAATAATGGGACTCTGTATTTCCCAATATAGTGATTGATGTGTATTACAGTGGTGCTTG  
GCACAATGTATATACGGGTGGGATACAATATGATGCTTGGGTGGAGAAATCTTTAGCGTCTC  
CTCAAACCTATAGAAAAAGCCAGAGTTTCTGTACCGACACTTTATCAGCTTCATATCCGATT  
AAGAAGTTTATGTCACAGAATTCTGGTCTATGCTGCTCCAACCGGGCGGGGAGTTGCTATCT  
ATACTTGAGAATGCCACGCGATATCCATAGAACAATCATTAAATAAAGCCCCTGTTATTTCT  
CTTTAGTTTACCAGCTGATGATGATAAGTCAGCGCTACTCACCAGAGCAAACGAAATATGGA  
TAAGGGATATCGCCAATAATACTGTTTTGGTCTCTGGTATTCTGGACGAACGGGTGGATACG  
CGATGATAACTGACGTTGAATACACCGGATATCTTACCAGCTAGCCAATGAATGGATTGAT  
AGCTATACCTGCGCATGGGTCTCTCCTCAAACAGCCCTAGATGAGATACTGGCATATCAAAT  
ATCTCCATATCCAATTGTTAGAGGCACATGCGAACATGGAGGTACTACTAGCCTTACGCTTA  
CTAATTGCACCATACTAGCAGCATTGGAAAATCTCCAGAATATGTTTTCCGCCGGCCACATG  
GAAGTAGACAACAACCGCCAAGTGAATTGGTATCGACTGGGTGCACATGGATACGCCGGCC  
AGCAGATCCGTTACAGAAAGAACCTTGTGGTATTACCCGGACAATAAATTACCGTCAGTTA  
GCCAATATTATATATGCCTACGGTGCCGGTAACTGGGGGAGTAAGGTAAACTTTCCCAAGC  
AACCGGTTACTCTTATGACTATGTGCAGGATACTACCTCACAAGCTACATGGGGAGTGATTA  
CGCGGACTATCTGGGATAACAACCAGACAAACGCCAATTTGTTAAAAGCATGGGCAGACCA  
GGAATTGATTATCCGCAAAGACCCCATTTATACCTATAAAATTAAGCTCCTTGATCTCACA  
GAGAACCCGGCTGGGAATTTAACAAGATATCACTCCTTGACCCGTATCAAATTATTGATGAA  
GAGTTGGGCATATCAGTTGAAACCCGCATTACCCGCATCAATAAGCGTGACTTATCTAATCC  
ATATGACGTAGATGTAGAAGTGGCCAACCTCCGTTGTTGATATCAGCGATACGATTGTAAATC  
TATCACGTCGCAAGTAATAGTCATAACCTCAAAGCTAACAGCCCCACAACCAAATTTCTAGC  
CATCATTATAAGCAGGTGTGTATGAATTATCACATAAACCGTATTCAACTAGGGAGTAACCT  
ACTCCATGCCCCGCTCAGGGGCATTGGCAAATACTTTGTGCGACTGGAATACACATATTGGACC  
CAGAAGAATGGGTGCGGCGCAATTATGAAGTGTGGTGTGATTATTGGCATATGTCTCAGGTG  
GTCAAATACGACCCGACCCATGGCTGGATCATAGATGAAGCTACTGGAGAAGGCTCGCGAC  
AAATTCCTTTATCCGAAGTTAAGGGTCGTATTTACTTGGCCAACCTGGATACCCAGACCACTC  
ACTGAGGAAGAATGTGAACGTTTCGTAACATTCTATAAGAAGTCCGCTATGACTACGCGGC  
ATATATCTGGACTACAGCAAACCGATTATCAAGGGGATTTATACCCCGCATTATGGACAATC  
GGCAGATGTGCTGGGAACGCAATGCTGATTTAATGGGTTCTTTGGTTATCCATGGTGCCAG  
CCGAATGAGATGCCGTACATGCCTTTGTTTGTCTTGAGATACATTCAGCAATATAAACTCTC

CCCTTAGAAATCAATACTAAAGATGTAAACTTTTTGGGAGGACGGCCATGACTAAAGAGGA  
AACCAATCAGCTAAACAGATTATCATCTCAAGTAGCGGTCATGGCCGAGACCATGTCCCGGG  
TAGAAAAATACATGGATGAGGGTAACAAGCGGCAGGAAATAGCTATCAAAGAGGCACAAG  
AGACCGCTGACCGGGCGTGTGAAAAAGCTATCAAGGTGCAGACCCAGGTATCAACGCTTGG  
CTGGGTCCGGTGGCATAATTGCGACTCTACTAGCGGCCGCTATGGGATGGCTTATTAATGAA  
ACCACTTGTTATGACCGCCGAGGAAGCTTTCAGTATCCTACACAACTCCATGTAAAAACCA  
TTATGATTGACGATGAACTCCTGTACTATCTCACCGAGGAAGACTGGCTGCCATACTTAAA  
GAGGCATCGGCTAATCTTCCCCAGTACCAGCCAGACCGATTTGATTGTGACAATTTTTCTATA  
GCCGTTATTGCACACATATCAGAAAAGTACCGGCTAAACAGTTGTGGTATGGCCAGAGGAG  
AAAGCCCCGCAAGGATATCACGCATGGAACGTTATCTTGACTGAGCATGGCCCTAAGTTTTTT  
GAGCCTCAGACCTGCACACTATTTGAATTCAACGGGGGCGGATATTCCGCCGACATGGTTTA  
CTTCGGGTAAACATTGCTAGGGTAATTACAATCTTTGAATTCTCTGCATAAACGGCAAATCT  
ATTCATACCTCTCATCGGCCTCTTCCATAGATCATAATCATATGTAGAATACCCATCCCGT  
TTTGATAGTTTAGGCCCATGGAATAACCAAATAAAATAGCTTCCTCTTTTGCAACATGGAA  
TGCTGGTAATAAGTCACCATCCCCTGCGATTACAACAACGTGGGTAATTTGGCGTTTCCCAC  
TGATTAGTGCAAAGTCTAAACCAAGCTGTAAATCTACCTTCTTCTGAACAAATATCGGTTTCC  
CTTTATCATCATTACCCCGATATGCTAATCTTCCCTTCGCGAACTGAAAACCGAGGAAGTTAC  
CTATGTTGTTAAAGAAAGATTGTTTTTTGCTAAACCGCGATGCTTCTTCAGGTGTTGGCGGAT  
TGCCCTGGTAAGGAAGACAATGGTAATAAAATGTGCGAAGTAACTCTATATTGTCCTGTGCG  
CTTAAGGAGATTATCTTCCGGATTTCTTCGCTAAGTTTTGTGTAATCAATATGTATATGGAAC  
TCATGCTCAGCAATTTTGTCTAGGTATCCGCCGTCAATAAAAATCGCTAATCTTGGCATTATA  
TCCCCCTTAAAAGAACAGGCCAGACACCAAAGTGTCTGGCCCATCCGTTACATTATCTCTT  
GCCATCCCTTACAGAACGTCAAGAACCATTAACACTAATATTATATAGCACAGGGTGTTC  
GTTGTCAACACCCTTATCAACATTGCCAACATATATATGCATTATACCTCGTCAAATGTCTAC  
ATATCAGTACCGGTATTA AAAAAGCCCCCATCATGGGGGCTGCTTTTTTTATTGTTAACTTCC  
GTTAACCTATTGACATATGGTACTGAATATGGTACTATATGAATGTAAGGAGTAAATGAAAT  
GACCGCCAGCGATAAGAGAGAACAGAAGATACGCCAGAACCCAAATAATGTTTCACTTGAA  
GATTTTGAATGGCTGGTCACCAAATACGGGACTATTA AAAATGGGCGGGTCTCATGCTAAGGC  
ACAGATTGGGAAGTACTCCCTGCCTTATCCAAGAACAAACCAATTCGTA CTTGCTATGTAA  
AGGATTTAATAAATAAAAATAGACAGCCTAAGGTA ACTGGTTGTCTGGAGGTGTATATGGAA  
ACAGCATTAAAGAAATTAGACTACTACATGGAGTTACCCTATACAGTTGTCATTGAGCCTGA  
CGAAGATAATGACGGCGGA ACTTACTATGTTGCCAGAGCCTTAGAATTGACAGGTTGCATAG  
GTGATGGAGATACTCCGGAAGAAGCCCTTGAAAGCTTGGCTATTCATAAAAAAATGTGGCTT  
GAAGACCAGATAGAACGAGGGTATAAAAATTCCTGAACCACAACAGAAGTTCAGCGGTAAGT  
TCAATGTCCGGGTTGGCCCGGAACTCCACCGGAAACTGTCCCAGAGGGCGTCTATGCACGAT  
ATGAGCTTAAATCAGTTTGTACGAAAAACTGGCGGAGGCTGTTCGGTTGA

>KBDCA1/KBDCA2-6

ATGACACTATACTATCAGGACGACTTTGT CAGTATTTTCAACGGTAACTGCATTGAAATCCT  
AAAAGAACTCCCCTCGAAAAGCATAGACCTCGTAATAACTGACCCGCTTACGGTATAGATT  
TTCACGGCCGTGGCAAAGGTGCAGAAAAGATAGCCAACGATAAGTCCTTTGACAATGTAGC  
CCAGCTGATTCAACAGGTTATCCCGGAGCTGGTCCGGCTTCTGAAGGATGATGCCGAAATCT  
ACTGGTTCTGCTCAGGTGGTAGCCAGAAGCCTCTTATAGCTCAGGTCTGGCTGGAATTCATA  
AAACTCAAACCACAGGTAGTCGTTAAGAACCTCATAATCTGGGATAAGTTATACCCCGCCT  
CGGCTGGGACTGGCGCTTCCAGTATGAAACCATCTTTCAACTCTATAAGGGCAAAGGCATCA  
AATCAGAAGGCCACTGCCGGGGTAATGTGATATCCGCCCGTAAAGTAATACCCAAATTCGG  
CGAACACCCCCTCCCAAAGTCCGGATATCATAGAGAAGCTTTTGCTACCCAAATCAAAGC

CCGGTGATGTTATACTCGACCCTTTCCTGGGCGGTGGTACAACAGCCGCGGTTGCCAAGAAA  
CATGGCCGTCCTACTGCATTGGAATAGAATAATAGACAAATACTGCGAGTTTGCAGCCGAAA  
GATGCCGGGGCATAACATAACAATAATTTAATGATTAACCCCCAAGACGATTGCCAAGGTGTT  
TAAGGCGTTCGCCAACATCTTCCATTTCTTCGCCAAGGTCATCCTATGATCTTCTGTTCCCTT  
GAAAATAAAATATAAAATAACAACCTGCTACTGTCAATAAAGCGGGCATTATCACAATGTGC  
CCAAGAACAAAATTCCAAAAAACCTCACCCTGCGATTAGCGATAAAAACCGTAGCAACAA  
CGAAAAATATGCAAGCAAGAATAGTCGCAATTGATAGATGAATACGTCTTGTTAAGACCAG  
AACTGACGGAATAGCAATAACAAGGATATAAAGACCAATCCACCACCACAACATACTGTTA  
TCCTCCCTTTAGAGCTTTTTAGATTATCCGCCAAGAGGCATAGTTACGCAATAAGTTTTGTTA  
TATTTATAAATTTGAGGCAGTTATGCCATATAAGCTACCGCATCCATGTGCCACCCCGGGT  
GTCCGGAACCTAACTCTAAAAGATACTGCCCCATCATCATCATGAGCAACAAGGGGTACCC  
CCTCAAGAACAGTTAAAGAAATCCCAATACGATAAAGGACAGAGGCAGTGCTTCCAAGCGAG  
GGTATGGGAGGCAATGGCAAGCGATACGTATATGCAAATTGAAACAAGACCCCTATGCTC  
TGATTGTTTGGGGGCGGGGTTGGTGGTGGCGGCCACTGATGTAGACCACATAGATGGTAATG  
TACACAACCTTGTGAGTGAATAACCTTCGTTCCCTCTGCCACGCCTGTCATAGCCGCAAGACT  
ATTAGAGAAAACCTACGGATTTGGAAATAAACCTCGATAATCTAAATGTAGAACCACAGG  
GGCAGGGGGAGTCAATTCTCTACAGCTTAAAACACGGAGACCGCAGGCCGAACCTTCGCGC  
AAGAATTCGGGAAATTCGAAAATCGGAAATGAAATATGACAACAAGAGGTAGAAAACCCA  
AACCGACTAAAATACACGAGTTAAACGGCAATCCTTCTCGTCTCAATTTGGGAAAAAGAAA  
AGAGAAGGAAATCAAACCATCTACTGGTGCGCCCACTTGTCATCATGGCTTGATACCGAAG  
CAAACGAGAATGGAAAAGAATTGTTCCGGAACCTTGCCAAATTGGGCGTTATTACCATGATT  
GATAGAGCAGCCTTGGCTGGTTATTGCGTAGCGTACAGCCGATGGCGTACTGCCGAAGAAG  
AATTGGGCAAGGGCTTTACCTACGAATATTATGATTCAAAAACGTTTCAACTCAAGCGTACT  
GTAAAGCCAGAAGTGCAAATTGCCCGTAACTCGCTCAATCAAGTCAAGGCGTTCTGCTCTGA  
ATTCGGATTGACGCCTTCCCTCGCGCAGCAGACTAGTACTGCCGGGTGAACCGAAGGACGAA  
GACCCTGTAGACAAAATGTTAAAAGAGGCTGGCTTATAGATGAATGATTATCAATCAAGAC  
GCGGTAAACAGGGCACTCACATTTATAGAGAACCTGAAACATACCAAGGGAGAATGGGCAG  
GCCAGCCATTCAAACCTCATGGCATGGCAAAAAGATATAGTAACTCGGCTCTTTGGAACCTT  
AACCTGATGGCACAAGGCAGTATCGTACATGCTATATAGAAGTACCCGAAAAAATGGAA  
AATCAACTTTGGCTGCTGCTATTGCCAATTACCTCTTGTGTTGCTGACGGTGAAGCCGGTGCTG  
AAATCTACTCGGCTGCAGCTGACCGGGGACAGGCTTCCCTGGTATTTAATGAAGCCGCTCAC  
ATGGTTTCGCACCCACCCTGCACTTCTATCCCGGTCTAAAGTGCTAGACAGTGTTAAACGCAT  
AATCATACCCAGAAACAACCTCGTTCTATCAAACCCTCTCAGCTGAAGCATATACCAAGCATG  
GTCTTAATGCTCACGGTATCATATTTGACGAACTGCACACTCAGAAAAATAGGGAGCTCTGG  
GATGTACTCACTACTTCAGGTGGTACCAGACGGCAACCATTAAACAGTCGCCATTACCACTGC  
TGGAGTTGACCGCAATAGCATCTGCTGGGAACTACATGACTACGCCCAGAAGATATTAAGTG  
GAATAGTTGAAGACGATACATTCCTGCCAGTTATCTATGCGGCAACTGACGATGACAATTGG  
GAAGACGAGTCTGTCTGGTACAAAGCAAACCCGGGGCTTGGTGAATTCCGCTCTATTGATGA  
AATGAAGCAGATGTACCGGCGGGCAAAAGAAACCCAGCCCTTGAAATGACCTTTCGCCAA  
CTCTATCTGAACCAGTGGGTATCATCATACGAGCGTTGGCTCCCTATGGATAAATGGGACAC  
ATGCGGTGCGCCCTTTGCCCTGAAAGAATTGGACGGGCAGGATTGTTATGCTGGGTTAGATC  
TGGCCAGTACCACAGACCTGACCGCTCTAGTCCTAGTATCCCGAATGGAGAAGGCGGATTT  
CAAGTCATACCGCACTTCTGGATACCTCTTGATAACATCCATGAGGCGGCCAAACGCGACAG  
GGTCCCTATCCGCTATGGTTAAAACAGGGATTAATCCATGCAACAGCCGGCAACATCATCG  
ACTACACTGCCGTTGAAGCCACTATTGACGAGTTGGCAGAGATATACCACATCAGAGAAATT  
GCCTTTGATAACTGGAACGCCTGCCGGCTAAGCCAGGACCTTACGGATAAAGGGCTATACCAT  
GGTCCCTTTCTCTCAGAGCGTTAAAACATGTCACCGCCACCAAAGAATTAATGAACATCA

CTCTGAGCGGAAAACCTTAAACACGGCGGGCATCCAGTGTGCGCTGGAATGCAGACAATAT  
GATGGTCTATCGAGACTCTAACGATAACCTCAAGCCTAACAAACAAAAGCCACTGGGAGA  
ATAGACGGCATGGTTGCACTAATCATGGCCCTCGATAGAGCAATTAACACGAAAATATTAC  
GCCTCACTCAGTCTATGAAAATCGTGGCGTCATTTCAATTTGACCTTTAACCACTGACTATTAT  
CCCAGGAGGACTATATGGCTAACCTATATTCAGGGTAAAACAGCTATTGTCTGGTATAAC  
CCGCCGCTCTGAAGGCGTAAACATCACCGACCCACGATATTGGAACCATTATGCTATGGCAT  
ACTCCGGAGTGAACGTCACAGAGCAAACCTCCCTAAGAGTCACAGCCGTCTGGTCATCTGTA  
AGGCTCTTGTCTGGACATTGGCAGGACTACCTCTCGTTGTGTACCAGCGTATGGAACGAGG  
TAAACAAAGAGCTGGGGGTATTAATCTTCATAAGCTTCTCCACGATAGCCCCAACCCCGAAC  
AAACCTCTTTCACATTCGGTTCCTTACTTCAAACCTCACCTACTACTCTGGGGCAATGGTTATG  
CAGAAATTGAATTTGATAACTGGGGTAATCCGGTGGGCCTCTGGCCTATACCACCCTGGCAT  
TGTGAACCGTCTCGAACACAATCAAAAGAAGTGTATTACAAAGTCACCTTACCGGATGGACA  
AATTAATAATATACCTCCATACCGAATGCTCCATTTTATGGGATTGACTACTGATGGAGTAC  
ATGGTTTGTCCCCATCGCATATGCCAGAGAAGCTATCGGGCTTTCACTTTCAGCAGAGGAA  
TTCGGTTCAAGGTTTTTTGGGCAAGGGACTAATATCGGTGGATTTTTTACCACCCTGGTCAA  
CTAAACGATAAGACCCGAGCTAACCTGACAAAACCCCTCGCTGAAGGTTATGAAGGTTTATC  
TAAAGCCCACAGAGCTATTTTACTTGAGGAGGGTATGAAATTTGAAAAAATTGGTATCCCTC  
CTGAAGATGCACAGTTTCTTGAGCTCAGGCAATTTAGGTAACCGATATCGCTCGAATATTC  
AACGTACCTCCTCACATGATAGGAGACCTCTCAAAGGCAACATTCTCAAACATCGAGCATCA  
GGCCATAGAATTTGTGGTTCACACCATGAGGCCGTGGTTCGTGAATTGGGAACAGGAAATCA  
ACCGCAAGCTCATGTGGACGCTCGGCCGATGATTACTTCGCTGAATTCGTAGTTGACGGCCTC  
CTGCGGGGGGATACAAAGAGCCGCTACGAGTCCTACGCTATCGGCAGACAATGGGGCTGGT  
TATCTGCAAACGATATCCGGTCACTTGAAAATATGAACCCGATTAAGGGTGGAGATGAATAC  
CTTGTCCCCTTGAATATGATACCAGCTGGCACGCCATTAAGAGAGCCTGATCAGAAAACAAG  
TAACAATCGCTCCGTACTTGCGGCCGTCATCTCTCAGATTGCTGAGCGAGAAACAATCAAAC  
TCGCACGAGCAGTTAAAAAATACTCTGGCCAACCCCTGACTCAATGGATAGACGACTACTAC  
CGAGACTTGCAGATTACATCGCGGTGAAATTTGCATGCAGTGGACTTAGACTACCAGAGGA  
ATATGTCAGTGAATTCACCCGTCGGTATGTTGAAGATTCTAAAAGCCAGATTACCACGGCCA  
CTGAGACTAATTCTTTAGCAATGTTAATTGACACATGGAAGATAAACAGATGCCAAGTTATA  
ACAAACACCGAAACAGCATTATTGGAGGATTGGTATGCCTAAACTAAACCCGAATATGTA  
ACCCGTAGTTACGATGTAACCGAACTCAGGGCAGAGGCTGACTCCGAAGGCACTCCCAAGA  
TTAAAGGCCATGCCGCTGTCTTTAACAAACAAAGCGTTGCCTTAGTGGGATTTGCGGAGCAA  
ATTCTGCCTGGCGCATTTGCGAAAACAATTACGAAATCAGATATTCGAGCACTCTGGAATCA  
TGACCCAAACTATGTACTGGGGAGAAATAAGAGCGATACTCTCCGTTTAGTCGAGGATGAA  
AAAGGCCTTTCAATTGAAATTGACCCGCCGATACTCAGTGGGCCAGGGATCTAATGGTATC  
CATCAAACGCGGTGACGTCTCGCAAATGTCATTTCGGATTCCATGTGATTAAAGACCACTGGG  
ATAATGATAACAGCCTCCGAACACTGGTTGAGGTAGAAGTGTGTTGATGTGTCACCGGTGACT  
TACCCTGCATATCCTCAGACAGATGTATCTGTCCGGTCAGCCCTGACAGAAGCAGGCATAGA  
CTATAACAACCTGTCTACCATCATCACCCGAACCAGCCATCAAATACCCCTCACCCAAACTG  
ATTATGACAACCTTGAATACTGCTATTAACGTACTAAGGAGTTATTTGCCCAAAGAGGAACAT  
CCGTTCAACCGGGCTCTCGCACTGACGGGTGTGTGGCTGAGGTGGAATACTCCGCCGGCA  
ATTAGAACTCGTAAAGTACGGATAGATATTAACCTAAATTAAGGAGAATACTCAAATGA  
CCAATGTTGAAACCCTAAACAAACGCAAGGCTGAATTGATTGCTCAATCTGAAGCCCTATTA  
GCTCTGGCAACTAAAGAAACCCGGGGATTGACCGACAAGGAACGGGAAGACGCTGATAAGC  
TAATGGGTGACATCAAATCCTTGGGTGATCTCATTACCCGCACTGTGGAACCTCAGCAAATG  
GAGATGTCTGTCGGTAAATCTGACAACAAACCCACCAATGAGACTGGATTCCGTAACCTCCG  
CGAGTTCATTCAGGCAGCCATCGCCAATCCTCGTGATTCTCGCCTTACCCGAGCCCAGACCA



CGGGTGC GGCTGCTGACGGTGGCGTACTTGTACCTCCGCAGTATCTAGATGAACTTCTGGCA  
GTCAAGCCCGCGGATGGTATTTTCCGCCCTCGTGCCCGGGTTATCCCTGCTGACAGTGCCCA  
GCCTGATGCATCAATATCCATGCCTGCCATTGACCACTCCGGTTCTTACGGCGTTTATGGGGG  
TGTAAGTGTGAGCTGGATATCTGAAGGTGGCACTAAACCAGAACTGGCATGAAATTCAA  
GAAATCACCTCAACCCAGCGAAGTCGCTGCGTATATTCCGGTAACTGATCGCTTGCTGAG  
GAATGCGCCCAAGGTTTCTGCTACTCTGACTGGTATGCTCAGATCAGCCATTATCGGTAGCG  
AAGACTATGCTTTCTTGC GCGGTAATGGTGTAGGAAAACCCACCGGAATTATCGGGCATGCT  
TCCACCAAGACTATTACCCGTACCACCAGTAGTGATGTTGTGTTGCTGATATCCGTAATATG  
TTCGCTGCCTGTCTTTTTGGTGGCCGCTATCTTTGGATTGCCTCTCAGACAATCCTGCCTAAA  
CTGATGACCATGAAAGATGAGGCGAACAACCTCATCTGGCTGCCGAATGCAGTTGATGGAC  
TACCCGGCAGTCTGCTCGGCATCCCTGTATTTATTAACCCTCGCAGTCCGGTCTTGGTAGTG  
CGGGAGACCTCGTACTGGTGGACCTGGAATATTACCTGATTAAGGATGGATTCCGGCATAGCT  
GTTGAGGCTAGCAATGCCCCCTTGTTTACCAGCAACAAAACCGTCATCAAGGCTTACCGAAC  
TGTGGATGGACAACCGTGGCTTACTGCCCTGTCCAGTTGGAGGATGGAACCTACTGTGA  
GCCCCTTTGTAGTACTCCAATAAACAACAACACTGGGGGTGGAATTACCGCCCCAGTGAC  
TAACAAAGAGAGGAATTGAATGAGGTTAACTGATAAAACCAAAATTGATATTGGTCTGGTA  
CCCCAGGCTCTTAATAACACCAATGCAACTGGTGCTTATTACAAATTAAGCGGGTACGGTCT  
GGTGTGGTTTTACTGGTAGTAGGTGCAATGGCAGCCACTAAAACCGCTATCGTTGAATTAT  
TGCAAGCTAAATCTGCTACAGGCACTGATGCCAAAGGGATACCGACCACTGCAGGTCAGTT  
GGCCAAGGCTACAATCACAGCTAACACCGAGGTAGTAGCCGGCACCATAGACCTGGCATCG  
GTCGCAAATACTGATGTTATTACCATCAACGGCGTTAGTTTTACTAAGGCGGCGCTACCGA  
TACTACTAAACAAGAATTTGCAGATGCGGCAGGGCTGGTAGCTTGTATCAACCATGCCACCT  
ATGGCGTACCTGGGGTAACTGCCAGTGCGGCAAGTGCAGTAGTCACTGTCACAGCCACTAAC  
CCCGGAGATACTCTGGTAACTCTGGATAAAACAGAGAATGCCGGTACTGTTACCCTGGCAAC  
TACAAAAGCCATCGCCTATGTTGAAGTGAATACCGACGGTCTCGACCATAACAATGGATTCA  
TTTATGTAGCTGCGAAAGTCACAACCACAGCTAACACTGTGGCCTCTATTGCCACAATCCGG  
GGAGATGCTGAGGTTACACCTACCCAGGTTGTCTCAGCCTCTGCCCACTATTAAGCTTAATC  
GCCGGGGGGTGGCAATTCCTTCTACTCCCCGGCGGGAGTCAATCATGCATAAAAATATTCTG  
TTTGAACAACCAACCTTTATCCAGATGAACTGCAATGCTGGTGCACATCAGTATCAAGCG  
AGGTATTAAGATGGCCTTAAAAATAATAACTGCCCCACCGTAGAACCTGTGAATTTGGCA  
GAGACCAAAATACACCTCAGAGTCGACAGTTCAACCGAAGACAATTATATAAATTCAGTGA  
TTAAATCCGCCCCGGAAGCAGTAGAAAACCTCACTGGTTCGAGCACTCATCACCCAGACGTTA  
GAATATCTAATCAGCAATTGGCCAAACCATGAAATCAAGCTTCCTCGCGCGCCTTTACAATC  
GGTAACCAATATTAATAACACCGACAGTGCAGGGAATGAATATATACTTGACGTCTCAAAT  
ACGTCGTAAACCTGATACCGAACCGGGACTAATCGTACCGGCTATCGGTTACAGCTGGCCA  
TCAATTAGTCTGAGACCCACTGGTGTATCACCATCAACTATATTGCCGGATATCCTCCATCA  
AATAGTGAACCTCCTGACTATCAGGCAAACGTACCTGCTGGCCTTAAACATGCAATATTGCT  
ACTGGTGGGGCACTGGTATGAGCAACGCCAACCAATCAACATTGGCACCTCGGTAACCTCAA  
ATACCGTTCACCGTCAAATGGCTCTGCGATTTCATATAGGGTTCATTACTGGGGATTTGAGGC  
ATGACATGGACATAGGCAAATTTAATCATCGAATAACTATTGAAAAACCCACCACGAACCA  
AGATGCAGCTGGAGGAATTACTCAGACATGGGCGGCTTTTGCCACTGTTTGGGCTTCGATTG  
AACCACTCGCTGGCCATCGGCTATTCCAGTCTAAGCAAGTAAATGCTGATGTTACCGGGGTT  
ATCAATATGCGCTATCTAGCAGGTGTAGAACCCAATATGCGTGTTAAATACGGCAGTCGGAT  
ACTTACCATTATCTCCATAATAAACACCAAAGAGCATAATATTGAACTCCAGTTGCTTTATA  
AAGAGGCCCTCGATTAAATGCAAATAAAATTAGAGGGACAAGCAGAATTACAACAGACTAT  
TTTAAACTGTCAAATCCGTACAATCCGATAAAGTAGAGCCGATTCTCTTTGATGCAGCCA  
AAATGGTTAAAACCGAAATTAATCTCGGGTACCGATAGATACTGGACGATTGAAAAAAGC

GGTCATCGCCAAGAAGCTGAAACGACGTGATAATTATAAACCGGCCCATCTATTGCTGGCA  
TCGACCGCAAGAAAGCCCCACATGCCCATATTGTGGAGTTTGGGAAGCGCTGGCAGGTACGC  
CAAAAAGGGAAACATAAAGGCCGTTATTTTGGCCCTATGCCAGCCAAGCCTTACTTTTCGTC  
CGGCTTGGGATACAACCAGAGACAAAGCCCTTAATCAGATAAAGACCGGCCTGGAAAAACA  
GATAGAGAGTGTGCGCAAATGAGCTTTGAAACATCGTTTGTGACATGGCTAAAAGCCAACGT  
ATCGCTTGTTACTAACCGCATATATGCGGTTATTGCCCCCCAAGACATTACTCAACCTTACTT  
GGTATACACCCTCATATCCGCACCCAGAGCATATTCGCACTCTGGTGTCTCTGGAATAGTTG  
AAGCCCGATATCAAATAAACATTTGTACCGACTCCTATGCAACCACCAAGAGTATTGCCAAG  
CAGTTACGGGATGCTCTAAGTGGTTACCGCGGGGCTATTGGTACAGAGATTGTGTATTCAGC  
TTTCTGTGACACCGAATTGGACAGTCATGATGACAACCTCAGAATTATACGTCAGTATCAGTG  
ATTACATGATTTTCATATAAAGAGTAGAAAGGAGTTAACACAATGGTAGAGGCAATAAAGGC  
TTATGGTACTACCCTTGCTCGGGCTGGCAACACCATCGCCGAATTGACTGGCATTAAATGGCC  
CAGCCATGTCAGCAGACACAATTGAGGTAACCTCATCAATCTGAGAATGGGTTTCAGGGA  
GTATATTCAAGGGCTGAAAGATGGAGGGCAAATATCGCTCGAGGGAAGCTTTATCCCTGGG  
GATACGAACGGACAAGTTGGTTTGATATCCGACTTTAACGAAGGCAATTCACAAACATTTGT  
AATTACATTCCCTGGCAACATCGCGACCTGGTCTTTTTCTGGTATCGTCACCAAGATAGAAA  
ACCAAGCGCCATTTGATGGCAAATTAGCATTAAATGCTGCCGTTAAAATAACCGGCAAACCT  
ACCCTCGGAATAAGTATATCTGATGGATTGACCACCCCGTATTTTGTATATCGGAAAGCGC  
AGTAATTACACCTGTCCCAGCCGAGATAAATACACCTATGTAGCTACTGTATTGAATGGTA  
TAACTTCGGTCACAGTCACACCTACCGCCTTAACCGGGGTAATAACAATCAATGGTAACGTG  
GTTGCTACTGGTATTGCATCCAGCGCGATAACTTTGGGTGCAGCTGGCAGCGTAACCGTTAT  
TACTATCGTAGTAACTGAGACCGGCAAGGCCCCCAAGACTTACACAATCTATCTCAGCAGAG  
CGAGTTAAGGATAAAATTATGACTGAAATAGTAAAGGGTACACCTATTACCCTGGATAAACT  
CCGTAACCTGCGGCTAGATTTAAATGCCATGGCTTTATTTGAAGAAGCTACCGGTAAGAGTG  
TGTTTAAAATCGGCTCGGATATGTCTGCTCGTGATTTACGAGCGCTACTCTGGGCTTGCCTCC  
GCTATGAGGACAAGAACCTTACGTTGGAGTCTGTGGGAGGAATGGTTACTCCCCAAAATTTG  
GCAGAGATTAACACTCGGTTAGTGGCAGCCTTACCGCTGCTATGCCCGAAGTGGAAAGTGA  
AGTAAGCCAGGGGGAAGCTCCAAGCCGTTAGTCTGGCTGGAATTGTGGGCCACGGCCCCGCT  
ATGACCTCCATCTTACAGAAGACCAGTTCTGGCGGCTAACATTGAAGGAATACGCTGCTCTA  
CTAAAGCACCACCGCATCAACATGGAATGGCAGGATTACCGGGCAGGTCTAATATGCTCAG  
TCTTAGCAAACATTAATCGAGACCCCCAAAAACATACCAAACCCTACACTCCAGCTGATTTT  
ATGCCTCAAAAAAATCCGACGAAAATGACACCTGAGCAGATGCTTGCTCAAATTAACCTCTT  
GAATACCGTATATAACGGGAACGAGGTCTAAATTATGGCCAGTGAAATAGCTAACTTATTCG  
TCACTTTAAGCGCCAATACCACTGATTTTCGCTGATAAAATGCAGGGCGTCGATAAATCCCTC  
GGTAAACTCCAACGCTCAGTTGATTCTACTGGTCAGAATTTCCAGAAACTGGGACTCAAATT  
TGCAGCTGTGCGCGGAGCTATGCTTGGTTCGCTTGGCTTACTGGTAGATAAATACTCTGAAG  
CTGGCGATGAGATAGCCAAAATGTCAAAACGAACCGGTTTCGGTGCTGAATCTCTTTCAGAG  
TTGAAATACGCGGCGGGTATGAGTGGTGCCAGTCTAGATGACCTTGAAACAGCTACCAAAA  
AAATGAGTAAGGCCATCATAGATGCCAATAGCGGGTCCAAGGCCATGATAGATAATTTTGA  
CGCCCTTGGTTTGAATGTTACCGCCATCAGGGATATGGCACCAGAAGAGCAGTTCTGGACTA  
TCGCTTACGCCTTAGCCGATATGGAAGACCAGACCTTGAAAACAACACTCGCACAGGATTTG  
TTTGGTAAATCAGGCACTAACATGCTGCCTCTACTCGCTGAAGGTCAGGCAGGCATTGCTTC  
TCTACGGCAAGAAGCCACGAACATAACGTGGTATACAGCGATGAGTCAGCAGCTGCGGCT  
GAGAAATTTTCAGGATAGTAAAGAACGCCTGACAACCTGCCATGCAAGGCATTGGGGCAACTA  
TCGCCGAAACGGTCATGCCAAAATCACCGAACTTATAAACTCTCTAACCGAAAAACTAAA  
ACCTGCAATGGCATGGTTATCCGAACATCCCGAAATGGTTGATGCCTTTGTTAAATTTGGAG  
CTATCTTCTTAGCTGGTGGAACATTAATGATTGGTATAGCACAAGCACTAAAAGCTTTTAAA

CTGATACGCACAGCTGTAATGGGGGTTTCAGCTGCTATGGCAATCTTACAAGGTATGACAGG  
CGTTGGGTTAGTCAAGGTTTTAGCTGGCGTTGCTATAGGTGGCGCTGCCATCTTAGGCATGA  
ATAAACTTGTGACGATGCCATGAATTCTGATGACAGCGGCCCATGACACAAGTGTACTCT  
GCTGCAACTGGGGTACTGAGATATCCGCCTCCGGAACATCCCCGGATTTGCACTGGGTGG  
GACAGTACCAGGACCGATTGGCTCACCTACCTTAGCTCTGGTACATGGGGGTGAAACTATTA  
TTCCCCCGGCCAATCCGGAGGAGCCATGGGCGCAACTTTTAATCTGAACTTTAACGGTGCG  
GTAATACGAGAAGATGCCGACATAGGCCGTATTGCAGAGCAAGTATCTGAGGTTATCCAAC  
GCACTTATGAGCGGAACTCAGACTGGCAGGTGCCTAAATGGCCAACAGCGTATCATTAAAC  
GGAAC TGACCTCAGCGTTTATGGAATTACCATCACCCAAGCCAAAATACACCAAACGGCTTT  
TAACCGTGATGTGACCCAATTAGATACCAGAGCTTTCGCCTCTCATGGTAAAAGAGAGGCC  
GCAAAATATCAACTGAATTTGACTTGTGGGTAGTAGTCTATTAGATATTCATACCAGATTG  
GCATCAATAAAACGGCTACTAACTACAGTAGAGACTGGCCAAC TGGTATTTCGATTTTATA  
TGGTATCTACTACAACGCTGCTCTGGATGAGATAGACGCTGAAAAC TTAGCCAGACCAGCA  
TGTCTGGCGTCATATCGTTCATTTGTGCAGATCCTTACGGCTACTCTACCACTGAAACCGATC  
AGACTGACAATATAGACACAGACCCGACAGCGGTAAGCATAACTGTAGGTGGCTCGGCTAT  
TGCCTTGCCGGTTTTATACCCTGACAGCTGGTGAGTCTCTATCCGGGCCGATATCCGTCAAAA  
ACAACGATACCGGCGAAGAGTTAATTTGGGATAACAGCCTGGTTGATACAGACGAGTTGGA  
GATAGACACCGAACACTGGGTAGTCAAAAAGAACGGCACGGAGTCTATGGCTGACGTATCC  
GGTCAATTCCTAAGGCTATTACCTGGGCAAACCAATGCAATTGTTATTACCGGATTTGGAAT  
AAAGGGCACATTACAGACTGTATTCCGAAGTAGATATATTTAAAAGGAGTTAATTATGGCTA  
ACGCACTGTACGCAAAGGCCAAAACAGGCATTTCTTTCCAAACAAATTGATCTACTGAATGAC  
ACTATTAAGGCAACGCTAGTTGATTACAGCTGACTATACCCCGGACCTTGCTAACCATGATTT  
CATTGATGATGTACCTGCTGGGGCAAGAGTGGCTACGGTTACATTGTCCGGCAAATTCGTAA  
CAGGTGGTGTGTTTGATGCTGCAGATGTTACCGCCAGTGCGGTCACAGGAGACCAGTGCGAG  
TACATCATTATCTGGCAAGACACCGGGACAGAAAGCACCTCACGTCTGATTGCGATTATAGA  
TACCGCTACCGGTCTGCCATTACTCCCAATGGGGCAAATATAAATATAGTCTGGGATAACG  
ACGCAAGTAAAATATTCGCTCTTTAAGGGGGGTGTATGTATGTACGCAATTATTGACAGCAC  
CCAAATAAATAAAAAGGGGCAGGAGTTTGTCCGGGTAGACTTCTGTCTGGAAAAAGGTGAG  
CCTCTGTATGCTGGATATCATGTCCGTGTGCCGGCCCGTGAATTAACCGAGAAGGAAATGAC  
CGGGCTGACCGGTAAAGACGGGGCAATCTCAAAGGCTGACTATGAGGCTTTTGTAGATAAA  
AACATAGGCTGGGAGATGAAGGATACCCCGTTTAATTGCCACTTTTTTCGCTAAGCCTGCCAC  
TCTTGAAGACCTCGATGATGCGGTACAGGCACGTATAAAGCTACTGAAAGCTAACTGTGCCG  
AGAATGAAAAGACTGGCTGGGAGTTTAAACCTGCACGGCAACTCTGTCCGCTTACTGTATGT  
TCTGCCAAGTACTCAAAGGCGAGAAGGAGATAATGCCTGGTACAGAACTAATGGAGGCTT  
GATATGAGCTTAATTGATATCGGCATTGCAGCTATCAATCGAGCGGGTAGCCTAACTTATAG  
TCTGACTATTCTGGAGGCTTCCAAACCCGCTAACGACACCGGAATCCTAGATGTTATTGAAG  
TTTGGTTCAGTTTAAGCGCTTCAGGTGTTAAAGTAGGAACTTTTTATGGTTCTGGTACAAGTT  
ATACAGGGAGAGATTATGAAACTATAGGGTCAGTAGCTTCTGGGGCAAAGCGAACATTTAC  
AGGTTTATCTATAGATGTAAC TACAGGAGATTTAATAGGAGTTTATTATTCAGGGGGCCGTC  
TGGAGATTGATACCTCTGGGGTTCCTCCCTTATGTATAGTAGCGGAGATGCTTTCGGCAGT  
ACTAAAACCTATAGTTCTGAGAGTTTCCCGATATCTCTTTATGGCACTGGTGCAACTTCTGCC  
GCAACCATTTCTCCATCAGCTATAGCACCCACTCTTGCTTTTGGCACTGCAAAGTTAAACCAA  
AACATTGTACCTTCAGGAATTTCTGCCGGTCTTATTTTCGGAACGGTTAATCTAAACCTGAAC  
ATTCTACCCTCTGGAATTGCCAGCACTTTGGGCATTGGCGCACCTATCATATCATTGGTGGG  
TTTAGTATTGCGCCCAGCGGTATAGCTTCTACACTAGTCTTTGGTATAGCTAAACTTAACCAG  
AACATCTTGCCATCTGGTATAGCATCAGGAATTACTTTCGGTAAACCTGAGCTTAGTATCATT  
GTATCAGGCGTTATAAGACCCAGTGGCATAACCATCTGGTGTGGTATTTGGCACGCCTATTCT

CTCGGCCGCAGGCCTGCATATACCGCCCCAAAGCAGATATGTAGTTGAACTGCATAATCCGA  
TAACTCAGGGCTGGCGAATACCTTCAAGCCACAATGACTCCTCCAGCGCATGGGAAGGCGA  
AACCAAGGCATATGATGGCAGCATCGCAACCGGTCAAGCATATACATTAACCACCAATGCA  
AAACTGGAAGTACCTGCCAGCCCGTTATACACAAGTAAAATCAGAATTTATGGCGGTGG  
AAATAATAATGGGACTCTGTATTTCCCAATATAGTGATTGATGTGTATTACAGTGGTGCTTG  
GCACAATGTATATACGGGTGGGATACAATATGATGCTTGGGTGGAGAAATCTTTAGCGTCTC  
CTCAAACATATAGAAAAAGCCAGAGTTTCTGTACCGACACTTTATCAGCTTCATATCCGATT  
AAGAAGTTTTATGTCACAGAATTCTGGTTCTATGCTGCTCCAACCGGCGGGGAGTTGCTATCT  
ATACTTGAGAATGCCACGCGATATCCATAGAACAATCATTAAATAAAGCCCTGTTATTTCT  
CTTTAGTTTACCAGCTGATGATGATAAGTCAGCGCTACTCACCAGAGCAAACGAAATATGGA  
TAAGGGATATCGCCAATAATACTGTTTTGGTCTCTGGTATTCTGGACGAACGGGTGGATACG  
CGATGATAACTGACGTTGAATACACCGGATATCTTACCCAGCTAGCCAATGAATGGATTGAT  
AGCTATACCTGCGCATGGGTCTCTCCTCAAACAGCCCTAGATGAGATACTGGCATATCAAAT  
ATCTCCATATCCAATTGTTAGAGGCACATGCGAACATGGAGGTACTACTAGCCTTACGCTTA  
CTAATTGCACCATACTAGCAGCATTGGAAAATCTCCAGAATATGTTTTCCGCCGGCCACATG  
GAAGTAGACAACAACCGCCAACTGAATTGGTATCGACTGGGTGCACATGGATACGCCGGCC  
AGCAGATCCGTTACAGAAAGAACCTTGTTGGTATTACCCGGACAATAAATTACCGTCAGTTA  
GCCAATATTATATATGCCTACGGTGCCGGTAACTGGGGGAGTAAGGTTAAACTTTCCCAAGC  
AACCGGTTACTCTTATGACTATGTGCAGGATACTACCTCACAAGCTACATGGGGAGTGATTA  
CGCGGACTATCTGGGATAACAACAGACAAACGCCAATTTGTTAAAAGCATGGGCAGACCA  
GGAATTGATTATCCGCAAAGACCCCATTTATACCTATAAAAATTAAGCTCCTTGATCTCACAA  
GAGAACCCGGCTGGGAATTTAACAAGATATCACTCCTTGACCCGTATCAAATTATTGATGAA  
GAGTTGGGCATATCAGTTGAAACCCGCATTACCCGCATCAATAAGCGTGACTTATCTAATCC  
ATATGACGTAGATGTAGAAGTGGCCAACCTCCGTTGTTGATATCAGCGATACGATTGTAAATC  
TATCACGTCGCAAGTAATAGTCATAACCTCAAAGCTAACAGCCCCACAACCAAATTCTAGC  
CATCATTATAAGCAGGTGTGTATGAATTATCACATAAACCGTATTCAACTAGGGAGTAACCT  
ACTCCATGCCCGCTCAGGGGCATTGGCAAATACTTTGTGACTGGAATACACATATTGGACC  
CAGAAGAATGGGTGCGGCGCAATTATGAAGTGTGGTGCATTATTGGCATATGTCTCAGGTG  
GTCAAATACGACCCGACCCATGGCTGGATCATAGATGAAGCTACTGGAGAAGGCTCGCGAC  
AAATTCCTTTATCCGAAGTTAAGGGTCGTATTTACTTGGCCAACCTGGATACCCAGACCACTC  
ACTGAGGAAGAATGTGAACGTTTCGTAACATTCTATAAGAACTGCCGCTATGACTACGCGGC  
ATATATCTGGACTACAGCAAACCGATTATCAAGGGGATTTATACCCCGCATTATGGACAATC  
GGCAGATGTGCTGGGAACGCAATGCTGATTTTAATGGGTTCTTTGGTTATCCATGGTGCCAG  
CCGAATGAGATGCCGTACATGCCTTTGTTTGTCTTGAGATACATTCAGCAATATAACACTCTC  
CCCTTAGAAATCAATACTAAAGATGTAAACTTTTTGGGAGGACGGCCATGACTAAAGAGGA  
AACCAATCAGCTAAACAGATTATCATCTCAAGTAGCGGTCATGGCCGAGACCATGTCCCAGG  
TAGAAAAATACATGGATGAGGGTAACAAGCGGCAGGAAATAGCTATCAAAGAGGCACAAG  
AGACCGCTGACCGGGCGTGTGAAAAAGCTATCAAGGTGCAGACCCAGGTATCAACGCTTGG  
CTGGGTGCGGTGGCATAATTGCGACTCTACTAGCGGCCGCTATGGGATGGCTTATTAAATGAA  
ACCACTTGTTATGACCGCCGAGGAAGCTTTCAGTATCCTGCACAACTCCATGTAAAAACCA  
TTATGATTGACGATGAACTCCTGTACTATCTCACCGAGGAAGACTGGCTGCCATACTTAAA  
GAGGCATCGGCTAATCTTCCCCAGTACCAGCCAGACCGATTTGATTGTGACAATTTTTCTATA  
GCCGTAATTGCACACATATCAGAAAAGTACCGGCTAAACAGTTGTGGTATGGCCAGAGGAG  
AAAGCCCGCAAGGATATCACGCATGGAACGTTATCTTGACTGAGCATGGCCCTAAGTTTTTT  
GAGCCTCAGACCTGCACACTATTTGAATTC AACGGGGGCGGATATTCGCCGACATGGTTTA  
CTTCGGGTAAACATTGCTAGGGTAATTACAATCTTTGAATTCTCTGCATAAACGGCAAATCT  
ATTCATACCTCTCATCGGCCTCTTCCATAGATCATAATCATATGTAGAATACCCATCCCGT

TTTGATAGTTTAGGCCCATGGAATAACCAAATAAAAATAGCTTCCTCTTTTGCAACATGGAA  
TGCTGGTAATAAGTCACCATCCCCTGCGATTACAACAACGTGGGTAATTTGGCGTTTCCCAC  
TGATTAGTGCAAAGTCTAAACCAAGCTGTAAATCTACCTTCTTCTGAACAAATATCGGTTTCC  
CTTTATCATCATTACCCCGATATGCTAATCTTCCTTCGCGAACTGAAAACCGAGGAAGTTTAC  
CTATGTTGTTAAAGAAAGATTGTTTTTTGCTAAACCGCGATGCTTCTCAGGTGTTGGCGGAT  
TGCCCTGGTAAGGAAGACAATGGTAATAAAATGTGCGAAGTAACCTCTATAATTGTCCTGTGCG  
CTTAAGGAGATTATCTTCCGGATTTCTTCGCTAAGTTTTGTGTAATCAATATGTATATGGAAC  
TCATGCTCAGCAATTTTGTCTAGGTATCCGCCGTCAATAAAAATCGCTAATCTTGGCATTATA  
TCCCCCTTAAAAGAACAGGCCAGACACCAAAGTGTCTGGCCCATCCGTTTACATTATCTCTT  
GCCATCCCTTACAGAACGTCAAGAACCATTAACACTAATATTATATAGCACAGGGTGTTTCC  
GTTGTCAACACCCTTATCAACATTGCCAACATATATATGCATTATACCTCGTCAAATGTCTAC  
ATATCAGTACCGGTATTAAGAAAGCCCCATCATGGGGGCTGCTTTTTTATTGTTAACTTCC  
GTTAACCTATTGACATATGGTACTGAATATGGTACTATATGAATGTAAGGAGTAAATGAAAT  
GACCGCCAGCGATAAGAGAGAACAGAAGATACGCCAGAACCCAAATAATGTTTCACTTGAA  
GATTTTGAATGGCTGGTCACCAAATACGGGACTATTAAGAAATGGGCGGGTCTCATGCTAAGGC  
ACAGATTGGGAAGTACTCCCTGCCTTATCCAAGAACAAACCAATTCGTAAGTGTCTATGTAA  
AGGATTTAATAAATAAAATAGACAGCCTAAGGTAACCTGGTTGTCTGGAGGTGTATATGGAA  
ACAGCATTAAAGAAATTAGACTACTACATGGAGTTACCCTATACAGTTGTCATTGAGCCTGA  
CGAAGATAATGACGGCGGAACCTACTATGTTGCCAGAGCCTTAGAATTGACAGGTTGCATAG  
GTGATGGAGATACTCCGGAAGAAGCCCTTGAAAGCTTGGCTATTCATAAAAAAATGTGGCTT  
GAAGACCAGATAGAACGAGGGTATAAAATTCCTGAACCACAACAGAAGTTCAGCGGTAAGT  
TCAATGTCCGGGTTGGCCCGAACTCCACCGGAAACTGTCCAGAGGGCGTCTATGCACGAT  
ATGAGCTTAAATCAGTTTGTACGGAAAACTGGCGGAGGCTGTTCGGTTGA

>KB1/cDCE-7

ATGGGCCAGACACTTTGGTGTCTGGCCTGTTCTTTTAAAGGGGGATATAATGCCAAGATTAGC  
GATTTTTATTGACGGCGGATACCTAGACAAAATTGCTGAGCATGAGTTCCATATACATATTG  
ATTACACAAAACCTTAGCGAAGAAATCCGGAAGATAATCTCCTTAAGCGCACAGGACAATAT  
AGAGTTACTTCGCACATTTTATTACCATTGTCTTCCTTACCAGGGCAATCCGCCAACACCTGA  
AGAAGCATCGCGGTTTAGCAAAAAACAATCTTTCTTTAACAACATAGGTAAACTTCCTCGGT  
TTTCAGTTTCGCGAAGGAAGATTAGCATATCGGGGTAATGATGATAAAGGGAAACCGATATT  
GTTCAGAAGAAGGTAGATTTACAGCTTGGTTTAGACTTTGCACTAATCAGTGGGAAACGCCA  
AATTACCCACGTTGTTGTAATCGCAGGGGATGGTGAAGTATTACCAGCATTCCATGTTGCAA  
AAGAGGAAGCTATTTTAGTTTGGTTATTCCATGGGCCTAAACTATCAAACCGGGATGGGTAT  
TCTACATATGATTATGATCTATGGAAAGAGGCCGATGAGAGGTATGAAATAGATTTGCCGTT  
TATGCAGAGAATTCAAAGATTGTAATTACCCTAGCAATGTTTACCCGAAGTAAACCATGTCCG  
GCGGAATATCCGCCCCGTTGAATTCAAATAGTGTGCAGGTCTGAGGCTCAAAAAACTTAGG  
GCCATGCTCAGTCAAGATAACGTTCCATGCGTGATATCCTTGCGGGCTTTCTCCTCTGGCCAT  
ACCACAACCTGTTTAGCCGGTACTTTTCTGATATGTGTGCAATAACGGCTATAGAAAAATTGT  
CACAATCAAATCGGTCTGGCTGGTACTGGGGAAGATTAGCCGATGCCTCTTTAAGTATGGGC  
AGCCAGTCTTCCTCGGTGAGATAGTACAGGAGTTCATCGTCAATCATAATGGTTTTTACATG  
GAGTTTGTGTAGGATACTGAAAGCTTCCTCGGCGGTCATAACAAGTGGTTTCATTTAATAAG  
CCATCCCATAGCGGCCGCTAGTAGAGTCGCAATTATGCCACCGACCCAGCCAAGCGTTGATA  
CCTGGGTCTGCACCTTGATAGCTTTTTTACACGCCCCGGTACGCGGTCTCTTGTGCCTCTTTGA  
TAGCTATTTCTGCGCCTTGTACCCTCATCCATGTATTTTTCTACCCGGGACATGGTCTCGG  
CCATGACCGCTACTTGAGATGATAATCTGTTTAGCTGATTGGTTTTCTCTTTAGTCATGGCCG  
TCCTCCCAAAAAGTTACATCTTTAGTATTGATTTCTAAGGGGAGAGTGTTATATTGCTGAAT

GTATCTCAAGACAAACAAAGGCATGTACGGCATCTCATTCCGGCTGGCACCATGGATAACCA  
AAGAACCCATTAATAATCAGCATTGCGTTCCCAGCACATCTGCCGATTGTCCATAATGCGGGG  
TATAAATCCCCTTGATAATCGGTTTGCTGTAGTCCAGATATATGCCGCGTAGTCATAGCGGC  
AGTTCTTATAGAATGTTACGAAACGTTACATTCTTCTCAGTGAGTGGTCTGGGTATCCAGT  
TGGCCAAGTAAATACGACCCTTAACTTCGGATAAAGGAATTTGTGCGGAGCCTTCTCCAGTA  
GCTTCATCTATGATCCAGCCATGGGTTCGGGTCGTATTTGACCACCTGAGACATATGCCAATA  
ATGACACCACACTTCATAATTGCGCCGACCCATTCTTCTGGGTCCAATATGTGTATTCCAGT  
CGACAAAGTATTTGCCAATGCCCTGAGCGGGCATGGAGTAGGTTACTCCCTAGTTGAATAC  
GGTTTATGTGATAATTCATACACACCTGCTTATAATGATGGCTAGAATTTGGTTGTGGGGGCT  
GTTAGCTTTGAGGTTATGACTATTACTTTCGACGTGATAGATTTACAATCGTATCGCTGATAT  
CAACAACGGAGTTGGCCAGTTCTACATCTACGTCATATGGATTAGATAAGTCACGCTTATTG  
ATGCGGGTAATGCGGGTTTCAACTGATATGCCCAACTCTTCATCAATAATTTGATACGGGTC  
AAGGAGTGATATCTTGTTAAATTCAGCCGGGTTCTCTTGTGAGATCAAGGAGCTTAATTTT  
ATAGGTATAAATGGGGTCTTTGCGGATAATCAATTCCTGGTCTGCCCATGCTTTTAACAAATT  
GGCGTTTGTCTGGTTGTTATCCAGATAGTCCGCGTAATCACTCCCCATGTAGCTTGTGAGGT  
AGTATCCTGCACATAGTCATAAGAGTAACCGGTTGCTTGGGAAAGTTTAACTTACTCCCC  
AGTTACCGGCACCGTAGGCATATATAATATTGGCTAACTGACGGTAATTTATTGTCCGGGTA  
ATACCAACAAGGTTCTTTCTGTAACGGATCTGCTGGCCGGCGTATCCATGTGCACCCAGTCG  
ATACCAATTCAGTTGGCGGTTGTTGTCTACTTCCATGTGGCCGGCGGAAAACATATTCTGGA  
GATTTTCCAATGCTGCTAGTATGGTGCAATTAGTAAGCGTAAGGCTAGTAGTACCTCCATGT  
TCGCATGTGCCTCTAACAATTGGATATGGAGATATTTGATATGCCAGTATCTCATCTAGGGCT  
GTTTGAGGAGAGACCCATGCGCAGGTATAGCTATCAATCCATTCAATTGGCTAGCTGGGTAAG  
ATATCCGGTGTATTCAACGTCAGTTATCATCGCGTATCCACCCGTTCCGTCAGAAATACCAGA  
GACCAAAACAGTATTATTGGCGATATCCCTTATCCATATTTGCTTTGCTCTGGTGAGTAGCGC  
TGACTTATCATCATCAGCTGGTAAACTAAAGGAAATAACAGGGGCTTTATTTAATGATTGTT  
CTATCGATATTGCATGGGCATTCTCAAGTATAGATAGCAACTCGCCGCCGGTCCGAGCAGCA  
TAGAACCAAGTATTCTGTGACATAAAAGTTCTTTGAAGCTGATAAAGTGTGCGGTACAGGAAAC  
TCTGGCTTTTTCTATAGTTTGAGGAGACGCTAAAGATTTCTCCACCCAAGCATCATATTGTAT  
CCCACCCGTATATACATTGTGCCAAGCACCCTGTAATACACATCAATCACTATATTGGGGA  
AATACAGAGTCCCATTATTATTTCCACCGCCATAAATACGTAATTTGCTGGTATAGAGGGGG  
CTGTCAGGTATCAGTTCAGTTTTGCATTGGTGGTTAATGTATATGCTTGACCGGTTGCGATG  
CTGCCATCATATGCCTTGGTTTCGCCTTCCCATGCGCTGGAGGGGTCATTGTGGCTTGAAGGT  
ATTCGCCAACCCCTGACTTATTGGGTTATGCAGTTCTACCGCATATCTGCTCTGGGGCGGTATA  
TGTAAGCCAACAACCTGAGATAATAGGCGTGCCAAACACTGTAGTGGGGGCTATGCCGCTCG  
GCTGAATGACCCCGGGAACAATTATACTTAACTCTGGCTCACCGAAAGCGAGAGTTGACGGT  
ATGCCACTTGGTAAGACGTTCTGATTTAACTTAGCTGTTCCAAATGCCAACGTAGAGGCTAT  
ACCGCTGGGGGCAATGGTAAATCCGCCAAACGATAATGACGGCTCACCAACTCCTGATGTA  
CTGGAAATACCACCGGGTAGTATATTCTGGTTGAGTTTAGCCGTTCCGAAGGCCAACGTAGA  
GGCTATTCCGCTCGGCAGAATATTTTGATTTAATTTGGCAGTACCAAAAGCAAGAGTGGAAG  
CTATGCCTGAGGGTGATATGGTAGCGGTAGAAGTCGCACCAGTGCCATAAATAGAAATGGC  
ATCACCCTCCATATTGTATACGTATGAGAACTTGACCCAAATGCATCTCCCGAGTATGCAT  
AAATGCCTAAGTAACCAGAAGAATCTCTTTCAATATAACCATCACTAAAATAACAACCTAGA  
AAATCACCAGCAGATACGTCTATAGATAATCCAGTAAACGTCTGCTTTGAACCAGAAGTTAC  
AGAACCAATTGTCTCGTAATCCCTATCGTCATAACTTGTCCCCGACCCAGAAAATGTCCCAA  
TCTTAAAACCTGTAATATTACTATATCCCCAAACCTCAACCGAATTTATGACACCTGTATCAT  
TAGCAGGATTATTTAAATCAACCCACGTCTGTAATGGGGATTGCGATGTGCCTCTATTTGTA  
GCACCAGGCCCAATATCAATTACAGCCATATCAAGCCTCCATTAGTTCTGTGCCGGGCAGTA

TCTCCTTTAAACCCTGCGGAGTATTTGGCAGAGCATAACAGTCAGCGGGCAGAGTATTCGGGAG  
GGCTTAAACTCCGTA CTGGTCTTTGCATTCTCGGCACAATTGACTTTTTAAAAGTTTGATACGT  
GCTTGTACCGCATCATCAAGGTCTTCAAGGGTGGCAGGCTTTGCGAACATATGACAGTTAAA  
TGGAGTATCCTGCATCTCCAGCCGATGTTCTTATCCACATAAGCCTCGTAAGCAGCCTTTGA  
AATAGTGCCATCCTTACCAGTAAGGCTGGTTAATTTCTTCTCGGTTAATTCACGGGGCCGGCAT  
ACGGACACGATATCCGTCATAAAGAGGCTCACCCCTTCTCAAGGTAAAAATCTACCCGGACA  
AATTCCTGTCCCTTTTTATTA ACTTGGGTGCTGTCAATTCTGGCGTACATTAGTCACCCCTAA  
AGTTGGAATATCTTGTGTTTGACCCGTTATCCAGACTATATTTATATCTGCTCCATTGGGAGTA  
ATGGGCAAACCGGTAGCAGTATCTATAATGGCAATTAGACGCGAGGTGCTTTCTGTCCAGT  
GTCTTGCCAGATAATGATATACTCGCACTGGTCACCCGTAACCGAACTGAAAGTGGCATCAG  
CGGCATCAAATACGCCCCGGTACTGATTTACCGGTAAGTGTAACAGTGGCCACTCTCGCA  
CCTGAAGGTACGTCATCTAGGAAATCATGGGCGGCAAGGTCTGGGGTATAATCAGCTGAAT  
CAACTAGCGTTGCCTTAATAGTGTCATTCAGTAGATCAATTTGTTTTGGAAAGAAATGCCTGTT  
TTGCCTTTGCGTACAGTGCGTTAGCCATAATTA ACTCCTTTTTAAATATATCTACTTCGGAATA  
CAGTCTGTAATGTGCCCTTTATTCCAAATCCGGTAATAACAATTGCATTGGTTTTGCCAGGTA  
ATAGCCTTGGGAATTGACCGGATACGTCAGCCATAGACTCCGTGCCGTTCTTTTTGACTACCC  
AGTGTTCCGGTGTCTATCTCCA ACTCGTCTGTATCAACCAGGCTGTTATCCCAAATTA ACTCTT  
CGCCGGTATCGTTGTTTTTGACGGATATCGGCCCGGATAGAGACTCACAGCTGTCAGGGTA  
TAAACCGGCAAGGCAATAGCCGAGCCACCTACAGTTATGCTTACCGCTGTCCGGTCTGTGTC  
TATATTGTCAGTCTGATCGGTTTCAGTGGTAGAGTAGCCGTAAGGATCTGCACAAATGAACG  
ATATGACGCCAGACATGCTGGTCTGGGTCAAGTTTTAGCGTCTATCTCATCCAGAGCAGCG  
TTGTAGTAGATAACCATGTATAAAAATCGAATACCAGTTGGCCAGTCTCTACTGTAGTTAGTAG  
CCGTTTTATTGATGCCAATCTGGTATGAATATCTAATAGACTACTACCCACAAGTACAAATTC  
AGTTGATAATTTGCGGGCCTCTCTTTTACCATGAGAGGCGAAAGCTCTGGTATCTAATTGGGT  
CACATCACGGTTAAAAGCCGTTTGGTGTATTTTGGCTTGGGTGATGGTAATTCCATAAACGC  
TGAGGTCAGTTCCGTTAAATGATACGCTGTTGGCCATTTAGGCACCTGCCAGTCTGAGTTTCC  
GCTCATAAGTGCGTTGGATAACCTCAGATACTTGCTCTGCAATACGGCCTATGTCCGGCATCTT  
CTCGTATTACCGCACCGTTAAAGTTCAGATTAAGTTGCGCCCATGGCTCCTCCGGATTGG  
CCGGCGGGAATAATAGTTTCACCCCCATGTACCAGAGCTAAGGTAGGTGAGCCAATCGGTCC  
TGGTACTGTCCCACCCAGTGCAAATCCGGGGATGTTTCCGGAGGCGGATATCTCAGTAACCC  
CAGTTGCAGCAGAGTACACTTGTGT CATGGGGCCGCTGTCATCAGAATTCATGGCATCGTCA  
ACAAGTTTATTCATGCCTAAGATGGCAGCGCCACCTATAGCAACGCCAGCTAAAACCTTGAC  
TAACCCAACGCCTGTCATACCTTGTAAGATTGCCATAGCAGCTGAAACCCCATACAGCTG  
TGCATCAGTTTAAAAGCTTTTAGTGCTTGTGCTATACCAATCATTAATGTTCCACCAGCTA  
AGAAGATAGCTCCAAATTAACAAAGGCATCAACCATTTCCGGGATGTTCCGGATAACCATGCC  
ATTGCAGGTTTTAGTTTTTTCGGTTAGAGAGTTTATAAGTTCCGGTGATTTTGGGCATGACCGTT  
TCGGCGATAGTTGCCCAATGCCTTGCATGGCAGTTGTCAGGCGTTCTTTACTATCCTGAAAT  
TTCTCAGCCGCAGCTGCTGACTCATCGTGTATACCACGTTTAGTTCGTGGGCTTCTTGCCGT  
AGAGAAGCAATGCCTGCCTGACCTTCAGCGAGTAGAGGCAGCATGTTAGTGCCTGATTTACC  
AAACAAATCCTGTGCGAGTGTTGTTTTCAAGGTCTGGTCTTCCATATCGGCTAAGGCGTAAG  
CGATAGTCCAGA ACTGCTCTTCTGGTGGCATATCCCTGATGGCGGTAACATTCAAACCAAGG  
GCGTCAA AATTATCTATCATGGCCTTGGACCCGCTATTGGCATCTATGATGGCCTTACTCATT  
TTTTTGGTAGCTGTTTCAAGGT CATCTAGACTGGCACCACTCATAACCCGCCGCGTATTTCAAC  
TCTGAAAGAGATTCAGCACCGAAACCGGTTTCGTTTTGACATTTTGGCTATCTCATCGCCAGCT  
TCAGAGTATTTATCTACCAGTAAGCCAAGCGAACCAAGCATAGCTCCGCCGACAGCTGCAA  
ATTTGAGTCCAGTTTCTGGAAATTCTGACCAGTAGAATCAACTGAGCGTTGGAGTTTACCG  
AGGGATTTATCGACGCCCTGCATTTTATCAGCGAAATCAGTGGTATTGGCGCTTAAAGTGAC

GAATAAGTTAGCTATTTCACTGGCCATAATTTAGACCTCGTTCCCGTTATATACGGTATTCAA  
GAGTTTAATTTGAGCAAGCATCTGCTCAGGTGTCATTTTCGTCGGATTTTTTTGAGGCATGAA  
ATCAGCTGGAGTGTAGGGTTTTGGTATGTTTTTTGGGGTCTCGATTAATGTTTGCTAAGACTGA  
GCATATTAGACCTGCCCCGTAATCCTGCCATTCCATGTTGATGCGGTGGTGTCTTTAGTAGAG  
CAGCGTATTCCTTCAATGTTAGCCGCCAGAACTGGTCTTCTGTAAGATGGAGGTCATAGCGG  
GCCGTGGCCCACAATTCCAGCCAGACTAACGGCTTGGAGCTTCCCCCTGGCTTACTTCACTTT  
CCACTTCGGGCATAGCAGCGGTGAAGGCTGCCACTAACCGAGTGTTAATCTCTGCCAAATTT  
TGGGGAGTAACCATTCTCCACAGACTCCAACGTAAGGTTCTTGTCTCATAGCGGAGGCA  
AGCCCAGAGTAGCGCTCGTAAATCACGAGCAGACATATCCGAGCCGATTTTAAACACACTCT  
TACCGGTAGCTTCTTCAAATAAAGCCATGGCATTAAATCTAGCCGCAGGTTACGGAGTTTA  
TCCAGGGTAATAGGTGTACCCTTTACTATTTCAAGTCATAATTTTATCCTTAACTCGCTCTGCT  
GAGATAGATTGTGTAAGTCTTGGGGGCCTTGCCGGTCTCAGTTACTACGATAGTAATAACGG  
TTACGCTGCCAGCTGCACCCAAAGTTATCGCGCTGGATGCAATACCAGTAGCAACCACGTTA  
CCATTGATTGTTATTACCCCGTTAAGGCGGTAGGTGTGACTGTGACCGAAGTTATACCATT  
CAATACAGTAGCTACATAGGTGTATTTATCTCCGGTCGGGACAGGTGTAATTACTGCGCTTT  
CCGATATAGCAAATAACGGGGTGGTCAATCCATCAGATATACTTATTCCGAGGGTAGGTTTTG  
CCGGTTATTTAACGGCAGCATTAAATGCTAATTTGCCATCAAATGGCGCTTGGTTTTCTATC  
TTGGTGACGATACCAGAAAAAGACCAGGTTCGCGATGTTGCCAGGGAATGTAATTACAAATG  
TTTGTGAATTGCCTTCGTTAAAGTCGGATATCAAACCAACTTGTCCGTTTCGTATCCCCAGGGA  
TAAAGCTTCCCTCGAGCGATATTTTCGCTCCATCTTTCAGCCCTTGAATATACTCCCTGAACC  
CATTCTCAGATTGATGATGAGTTACCTCAATTGTGTCTGCTGACATGGCTGGGCCATTAATGC  
CAGTCAATTCGGCGATGGTGTGTCAGCCGAGCAAGGGTAGTACCATAAGCCTTTATTGCC  
TCTACCATTGTGTTAACTCCTTTCTACTCTTTATATGAAATCATGTAATCACTGATACTGACG  
TATAATTCTGAGTTGTCATCATGACTGTCCAATTCGGTGTACAGAAAGCTGAATACACAAT  
CTCTGTACCAATAGCCCCGCGGTAACCACTTAGAGCATCCCGTAACTGCTTGGCAATACTCT  
TGGTGGTTGCATAGGAGTCGGTACAAATGTTTATTTGATATCGGGCTTCAACTATTCCAGAG  
ACACCAGAGTGCGAATATGCTCTGGGTGCGGATATGAGGGTGTATACCAAGTAAGGTTGAG  
TAATGTCTTGGGGGGCAATAACCGCATATATGCGGTTAGTAACAAGCGATACGTTGGCTTTT  
AGCCATGTCACAAACGATGTTTCAAAGCTCATTTGGCGACTCTCTATCTGTTTTTCCAGGC  
CGGTCTTTATCTGATTAAGGGCTTTGTCTCTGGTTGTATCCCAAGCCGGACGAAAGTAAGGC  
TTGGCTGGCATAGGGCCAAAATAACGGCCTTTATGTTTCCCTTTTTTTGGCGTACCTGCCAGCG  
CTTCCAAACTCCACAATATGGGCATGTGGGGCTTTCTTGCGGTCGATGCCAGCAATAGATGG  
GGCCGGTTTTATAATTATCACGTCGTTTCAGCTTCTTGGCGATGACCGCTTTTTTCAATCGTCC  
AGTATCTATCGGTACCCGAGATTTAATTTTCGGTTTTAACCATTTTGGCTGCATCAAAGAGAAT  
CGGCTCTACTTTATCGGATTGTACGGATTTTGACAGTTTTAAAATAGTCTGTTGTAATTCTGC  
TTGTCCCTCTAATTTTATTTGCATTTAATCGAGGGCCTCTTTATAAAGCAACTGGAGTTCAAT  
ATTATGCTCTTTGGTGTATTATTATGGAGATAATGGTAAGTATCCGACTGCCGTATTTAACACG  
CATATTGGGTTCTACACCTGCTAGATAGCGCATATTGATAACCCCGGTAACATCAGCATTTA  
CTTGCTTAGACTGGAATAGCCGATGGCCAGCGAGTGGTTCAATCGAAGCCCAAACAGTGGC  
AAAAGCCGCCATGTCTGAGTAATTCCTCCAGCTGCATCTTGGTTCGTGGTGGGTTTTTCAAT  
AGTTATTCGATGATTAATTTGCCTATGTCCATGTCATGCCTCAAATCCCCAGTAATGAACCC  
TATATGAATCGCAGAGCCATTTGACGGTGAACGGTATTTGAGTTACCGAGGTGCCAATGTTG  
ATTGGTTGGCGTTGCTCATACCAGTGCCCCACCAGTAGCAATATTGCATGTTTAAAGGCCAGC  
AGGTACGTTTTGCCTGATAGTCAGGGAGTTCACTATTTGATGGAGGATATCCGGCAATATAGT  
TGATGGTGATAGCACCAGTGGGTCTCAGACTAATTGATGGCCAGCTGTAACCGATAGCCGGT  
ACGATTAGTCCCGGTTCCGGTATCAGGGTTTTACGACGTATTTTGAGACGTCAAGTATATATTC  
ATTCCTGCACTGTCCGGTGTATTTAATATTGGTTACCGATTGTAAGGCGCGGAGGAAGCT



TGATTTTCATGGTTTGGCCAATTGCTGATTAGATATTCTAACGTCTGGGTGATGAGTGCTCGAC  
CAGTGAGGTTTTCTACTGCTTCGCGGGCGGATTTAATCAGTGAATTTATATAATTGTCTTCGG  
TTGAACTGTGCGACTCTGAGGTGTATTTTGGTCTCTGCCAAATTCACAGGTTCTACGGTGGGGG  
CAGTTATTATTTTAAAGGCCATCTTTAATACCTCGCTTGATACTGATGTGCACCAGCATTGCA  
GTTTCATCTGGATAAAGGTTGGTTGTTTCAAACAGAATATTTTTATGCATGATTGACTCCCGC  
CGGGGAGTAGAAGGAATTGCCACCCCCGGCGATTAAGCTTAATAGTGGGCAGAGGCTGAG  
ACAACCTGGGTAGGTGTAACCTCAGCATCTCCCCGATTGTGGCAATAGAGGCCACAGTGTT  
AGCTGTGGTTGTGACTTTTCGAGCTACATAAATGAATCCATTGTTATGGTCGAGACCGTCCG  
TATTCACCTCAACATAGGCGATGGCTTTTGTAGTTGCCAGGGTAACAGTACCGGCATTCTCTG  
TTTTATCCAGAGTTACCAGAGTATCTCCGGGGTTAGTGGCTGTGACAGTGACTACTGCACTT  
GCCGCACTGGCAGTTACCCAGGTACGCCATAGGTGGCATGGTTGATACAAGCTACCAGCCC  
TGCCGCATCTGCAAATCTTGTTTAGTAGTATCGGTAGCGGCCGCTTAGTAAAACCTAACGC  
CGTTGATGGTAATAACATCAGTATTTGCGACCGATGCCAGGTCTATGGTGCCGGCTACTACC  
TCGGTGTAGCTGTGATTGTAGCCTTGGCCAACTGACCTGCAGTGGTCGGTATCCCTTTGGCA  
TCAGTGCCTGTAGCAGATTTAGCTTGCAATAATTCAACGATAGCGGTTTTAGTGGCTGCCATT  
GCACCTACTACCAGTAAAACCAGCACCAGACCGTACCCGCTTAATTTGTAATAAGCACCAGT  
TGCATTGGTGTATTAAAGAGCCTGGGGTACCAGACCAATATCAATTTTGGTTTTATCAGTTAA  
CCTCATTCAATTCCTCTCTTTGTTAGTCACTGGGGGCGGTAATTCCACCCCCAGTGTTTGTG  
TTTTATTGGAGTACTACAAAGGGGCTCACAGTGGTAGTTCCATCTCCAAGTGGACAGGGGCA  
GTAAGCCACGGTTGTCCATCCACAGTTCGGTAAGCCTTGATGACGGTTTTGTTGCTGGTAAA  
CAAGGGGGCATTGCTAGCCTCAACAGCTATGCCGAATCCATCCTTAATCAGGTAATATTCCA  
GGTCCACCAGTACGAGGTCTCCCGCACTACCAAGGACCGGACTGCGAGGGTTAATAAATAC  
AGGGATGCCGAGCAGACTGCCGGGTAGTCCATCAACTGCATTCCGGCAGCCAGATGAGGTTG  
TTCGCCTCATCTTTCATGGTTCATCAGTTTAGGCAGGATTGTCTGAGAGGCAATCCAAAGATA  
GCGGCCACCAAAAAGACAGGCAGCGAACATATTACGGATATCAGCGAACACAACATCACTA  
CTGGTGGTACGGGTAATAGTCTTGGTGGAAAGCATGCCCGATAATTCCGGTGGGTTTTCTAC  
ACCATTACCGCGCAAGAAAGCATAGTCTTCGCTACCGATAATGGCTGATCTGAGCATAACCAG  
TCAGAGTAGCAGAAACCTTGGGCGCATTCCCTCAGCAAGCGATCAGTTACCGGAATATACGC  
AGCGACTTCGCTGGGGTTGAGGGTGATTTCTTTGAATTTTCATGCCAGTTTCTGGTTTAGTGCC  
ACCTTCAGATATCCAGCTGACAGTTACACCCCCATAAACGCCGTAAGAACCGGAGTGGTCAA  
TGGCAGGCATGGATAATTGATGCATCAGGCTGGGCAGTGTGAGCAGGGATAACCCGGGCACG  
AGGGCGGAAAATACCATCCGCGGGCTTGACTGCCAGAAGTTCATCTAGATACTGCGGAGGT  
ACAAGTACGCCACCGTCAGCAGCCGACCCGTGGTCTGGGCTCGGGTAAGGCGAGAATCAC  
GAGGATTGGCGATGGCTGCCTGAATGAATCGCCGAAGTTACGGAATCCAGTCTCATTGGTG  
GGTTTGTGTCAGATTTACCGACAGACATCTCCATTTGCTGAAGTTCCACAGTGCGGGTAAT  
GAGATACCCAAGGATTTGATGTCACCCATTAGCTTATCAGCGTCTTCCCGTTCCTTGTCCGGT  
CAATCCCCGGGTTTTCTTTAGTTGCCAGAGCTAATAGGGCTTCAGATTGAGCAATCAATTCAG  
CCTTGCGTTTTGTTTAGGGTTTCAACATTGGTCAATTTGAGTATTCTCCTTTTAATTTAGGTTAAT  
ATCTATCCGTACTTTACGAGTTCTAATTGCCGGCGGAGTATTTCCACCTCAGCCACACACCCG  
TCAGTGCGAGAGCCCGGTTGAACCGGATGTTCCCTCTTTGGGCAAATAACTCCTTAGTACGTT  
AATAGCAGTATTCAAGTTGTCATAATCAGTTTGGGTGAGGGGTATTTGATGGCTGGTTCGGG  
TGATGATGGTAGACAGGTTGTTATAGTCTATGCCTGCTTCTGTGAGGGCTGACCGGACAGAT  
ACATCTGTCTGAGGATATGCAGGGTAAGTCACCGGTGACACATCAAACAGTTCTACCTCAAC  
CAGTGTTCCGAGGCTGTTATCATTATCCAGTGGTCTTTAATCACATGGAATCCGAATGACA  
TTTGCGAGACGTCACCGCGTTTTGATGGATAACCATTAGATCCCTGGCCCACTGAGTATCCGGC  
GGGTCAATTTCAATTGAAAGGCCTTTTTTCATCCTCGACTAAACGGAGAGTATCGCTCTTATTT  
CTCCCCAGTACATAGTTTGGTTCATGATTCCAGAGTGCTCGAATATCTGATTTTCGTAATTGTT

TTCGCAAATGCGCCAGGCAGAATTTGCTCGCGAAATCCCCTAAGGCAACGCTTTGTTTGT  
AAAGACAGCGGCATGGCCTTTAATCTTGGGAGTGCCTTCGGAGTCAGCCTCTGCCCTGAGTT  
CGGTTACATCGTAACTACGGGTTACATATTCGGGTTTAGTTTTAGGCATACCAATCCTCCAAT  
AATGCTGTTTTCGGTGTTTGTATAACTTGGCATCTGTTTATCTTCCATGTGTCAATTAACATTG  
CTAAAGAATTAGTCTCAGTGGCCGTGGTAATCTGGCCTTTTAGAATCTTCAACATACCGACGG  
GTGAATTCCTGACATATTCCTCTGGTAGTCTAAGTCCACTGCATGCAAATTTACCCGCGATG  
TAATCTGGCAAGTCTCGGTAGTAGTCTATCCATTGAGTCAGGGTTTGGCCAGAGTATTTT  
TTAACTGCTCGTGCAGTTTTGATTGTTTTCTCGCTCAGCAATCTGAGAGATGACGGCCGCAAG  
TACGGAGCGATTGTTACTTGTTTTTCTGATCAGGCTCTTTAATGGCGTGCCAGCTGGTATCAT  
ATCAAGGGGACAAGGTATTCATCTCCACCCTAATCGGGTTCATATTTTCAAGTGACCGGA  
TATCGTTTGCAGATAACCAGCCCCATTGTCTGCCGATAGCGTAGGACTCGTAGCGGCTCTTT  
GTATCCCCCGCAGGAGGCCGTCAACTACGAATTCAGCGAAGTAATCATCGCCGAGCGTCCA  
CATGAGCTTGCGGTTGATTTCTGTCCCAATTCACGAACCACGGCCTCATGGTGTGAACCA  
CAAATTCATGGCCTGATGCTCGATGTTTGAAGAATGTTGCCTTTGAGAGGTCTCCTATCATGT  
GAGGAGGTACGTTGAATATTCGAGCGATATCGGTTACCTGAAATTGCCTGAGCTCAAGAAAC  
TGTGCATCTTCAGGAGGGATACCAATTTTTTCAAATTCATACCCTCCTCAAGTAAAATAGCT  
CTGTGGGCTTTAGATAAACCTTCATAACCTTCAGCGAGGGTTTTTGTGAGTTAGCTCGGGTC  
TTATCGTTTAGTTGACCAGGGTGGGTAAAAAATCCACCGATATTAGTCCCTTGCCCAAAAA  
CCTTGAACCGAATTCCTCTGCTGAAAGTGAAAGCCCGATAGCTTCTCTGGCATATGCGATGG  
GGGACAAACCATGTACTCCATCAGTAGTCAATCCATAAAATGGAGCATTCCGGTATGGAGGT  
ATATTTTTAATTTGTCCATCCGGTAAGGTGACTTTGTAATACAGTTCTTTTGATTGTGTTTCA  
GACGGTTCACAATGCCAGGGTGGTATAGGCCAGAGGCCACCGGATTACCCAGTTATCAA  
ATTCAATTTCTGCATAACCATTGCCCCAGAGTAGTAGGTGAGTTTGAAGTAAGGAACCGGAAT  
GTGAAAGAGGTTTTGTTCCGGGTTGGGGCTATCGTGGAGAAGCTTATGAAGATTAATACCCCC  
AGCTCTTTGTTTACCTCGTTCCATACGCTGGTACACAACGAGAGGTAGTCCTGCCAATGTCCA  
CGACAAGAGCCTTACAGATGACCAGACGGCTGTGACTCTTAGGGAGGTTTGTCTGTGACGT  
TCACTCCGGAGTATGCCATAGCATAATGGTCCAATATCGTGGGTCGGTGTATGTTTACGCCTT  
CAGAGCGGCGGGTTATACCAGACAATAGCTGTTTTACCCTGAATATAGGGTTAGCCATATAG  
TCCTCCTGGGGATAATAGTCAGTGGTTAAAGGTCAAATGAAATGACGCCACGATTTTCATAG  
ACTGAGTGAGGCGTAATATTTTCGTGTTAATTGCTCTATCGAGGGCCATGATTAGTGCAAC  
CATGCCGTCTATTCTCCAGTGGCTTTTTGTTTGTAGGCTTGAGGTTATCGTTAGAGTCTCG  
ATAGACCATCATATTGTCTGCATTCCAGCGCAACACTGGATGCCCGCCGTGTTTAAAGTTTTCC  
GCTCAGAGTGATGTTCAATTAATCTTTGGTGGGCGGTGACATGTTTTTAAACGCTCTGAGAGA  
AAGGGACCATGGTATAGCCCTTATCCGTAAGGTCCCTGGCTTAGCCGGCAGGCGTTCCAGTTA  
TCAAAGGCAATTTCTCTGATGTGGTATATCTCTGCCAACTCGTCAATAGTGGCTTCAACGGC  
AGTGTAGTCGATGATGTTGCCGGCTGTTGCATGGATTAATCCCTGTTTTAACCATAGCGGAT  
AGGGAACCCTGTGCGTTTGGCCGCCTCATGGATGTTATCAAGAGGTATCCAGAAGTGCGGT  
ATGACTTGAAATCCGCCTTCTCCATTCGGGAATACTAGGACTAGAGCGGTCAGGTCTGTGGT  
ACTGGCCAGATCTAACCAGCATAACAATCCTGCCCGTCCAATTCTTTCAGGGCAAAGGGCG  
CACCGCATGTGTCCATTTATCCATAGGGAGCCAACGCTCGTATGATGATACCCACTGGTTC  
AGATAGAGTTGGCGAAAGGTCATTTCAAGGGCTGGGGTTTTCTTTTGGCCGCCGGTACATCTG  
CTTCATTTTCATCAATAGAGCGGAATTCACCAAGCCCCGGGTTTGCTTTGTACCAGACAGACT  
CGTCTTCCAATTGTCATCGTCAGTTGCCGCATAGATAACTGGCAGGAATGTATCGTCTTCAA  
CTATTCACCTTAATATCTTCTGGGCGTAGTCATGTAGTCCCAGCAGATGCTATTGCGGTCAA  
CTCCAGCAGTGGTAATGGCGACTGTTAATGGTTGCCGTCTGGTACCACCTGAAGTAGTGAGT  
ACATCCAGAGCTCCCTATTTTTCTGAGTGTGCAGTTCGTCAAATATGATACCGTGAGCATT  
AGACCATGCTTGGTATATGCTTCAGCTGAGAGGGTTTGATAGAACGAGTTGTTTTCTGGGTAT

GATTATGCGTTTAACTGTCTAGCACTTTAGACCGGGATAGAAGTGCAGGGTGGGTGCGAA  
CCATGTGAGCGGCTTCATTAATAACCAGGGAAGCCTGTCCCCGGTCAGCTGCAGCCGAGTAG  
ATTTACAGCACCGGCTTACCCTCAGCAAACAAGAGGTAATTGGCAATAGCAGCAGCCAAAG  
TTGATTTTCCATTTTTTCGGGGTACTTCTATATAGCATGTACGATACTGCCTTGTGCCATCAG  
GGTTAAGGGTTCCAAAGAGCCGAGTTACTATATCTTTTTGCCATGCCATGAGTTTGAATGGC  
TGGCCTGCCCATTCTCCCTTGGTATGTTTTCAGGTTCTCTATAAATGTGAGTGCCTTGTACC  
GCGTCTTGATTGATAATCATTATCTATAAAGCCAGCCTCTTTAACATTTTGTCTACAGGGTC  
TTCGTCTTCGGTTCACCCGGCAGTACTAGTCTGCTGCGCGAGGAAGGCGTCAATCCGAATT  
CAGAGCAGAACGCCTTGACTTGATTGAGCGAGTTACGGGCAATTTGCACTTCTGGCTTTACA  
GTACGCTTGAGTTGAAACGTTTTTGAATCATAATATTCGTAGGTAAAGCCCTTGCCCAATTCT  
TCTTCGGCAGTACGCCATCGGCTGTACGCTACGCAATAACCAGCCAAGGCTGCTCTATCAAT  
CATGGTAATAACGCCCAATTTGGCAAGTTCGGAACAATCTTTTCCATTCTCGTTTTGCTTC  
GGTATCAAGCCATGATGGACAAGTGGGCGCACCCAGTAGATGGTTTGATTTCTTCTTTTTCT  
TTTTCCCAAATTTGAGACGAGAAGGATTGCCGTTTTAACTCGTGTATTTTAGTCGGTTTTGGGTTT  
TCTACCTCTTGTGTCATATTTTCAATTTCCGATTTTTCGAATTTCCCGAATTTCTTGC CGAAGGTT  
CGGCCTGCGGTCTCCGTGTTTTAAGCTGTAGAGAATTGACTCCCCCTGCCCTGTGGTGTTCT  
ACATTTAGATTATCGAGGTTTATTTCCAAATCCGTAGTTTTTCTCTAATAGTCTTGC GGCTATG  
ACAGGCGTGGCAGAGGGAACGAAGGTTATTCCTGACAAGTTGTGTACATTACCATCTATGT  
GGTCTACATCAGTGGCCGCCACCACCAACCCCGCCCCCAACAATCAGAGCATAGGGGGTC  
TTGTTTCAATTTGCATATACGTATCGCTTGCCATTGCCTCCCATAACCTCGCTTGGAAGCACT  
GCCTCTGTCCTTATCGTATTGGGATTTCTTTAACTGTTCTTGAGGGGGTACCCCTTGTGCTCA  
TGATGATGATGGGGGCAGTATCTTTTTAGAGTTAGTTCGGGACACCCGGGGTGGGCACATGG  
ATGCGGTAGCTTATATGGCATAACTGCCTCAAATTTATAAATATAACAAACTTATTGCGTA  
ACTATGCCTCTTGGCGGATAATCTAAAAAGCTCTAAAGGGAGGATAACAGTATGTTGTGGTG  
GTGGATTGGTCTTTATATCCTTGTATTGCTATTCCGTCAAGTTCTGGTCTTAAACAAGACGTATT  
CATCTATCAATTGCGACTATTCTTGCTTGCATATTTTTCGTTGTTGCTACGGTTTTTATCGCTA  
ATCGCAGTGGTGAGGTTTTTTGGAATTTTGTCTTGGGCACATTGTGATAATCGCCGCTTTAT  
TGACAGTAGCAGTTGTTATTTTATATTTTATTTTCAAGGGAACAGAAGATCATAGGATGACC  
TTGGGCGAAGAAATGGAAGATGTTGGCGAACGCCTTAAACACCTTGGAATCGTCTTGGGG  
GTTAATCATTAAATTATTGTTATGTATGCCCCGGCATCTTTCGGCTGCAAACCTCGCAGTATTT  
GTCTATTAGTTCTATTCCAATGCAGTGACGGCCATGTTTCTTGGCAACCCGCGGCTGTTGTACC  
ACCGCCAGGAAAGGGTCGAGTATAACATCACCGGGCTTTGATTTGGGTAGCAAAGCTTCT  
CTATGATATCCGGACTTTTGGGAGTGGGGTGTTCGCCGAATTTGGGTATTACTTTACGGGCG  
GATATCACATTACCCCGGCAGTGGCCTTCTGATTTGATGCCTTTGCCCTTATAGAGTTGAAAG  
ATGGTTTCATACTGGAAGCGCCAGTCCCAGCCGAGGCCGGGGTATAACTTATCCCAGATTAT  
GAGGTTCTTAACGACTACCTGTGGTTTGGAGTTTATGAATTCCAGCCAGACCTGAGCTATAA  
GAGGCTTCTGGCTACCACCTGAGCAGAACCAGTAGATTTCCGCATCATCCTTCAGAAGCCGG  
ACCAGCTCCGGGATAACCTGTTGAATCAGCTGGGCTACATTGTCAAAGGACTTATCGTTGGC  
TATCTTTTCTGCACCTTTGCCACGGCCGTGAAAATCTATACCGTAAGGCGGGTCAGTTATTAC  
GAGGTCTATGCTTTTCGAGGGGAGTTCTTTTAGGATTTCAATGCAGTTACCGTTGAAAATACT  
GACAAAGTCGTCTGATAGTATAGTGTCAT

>KB1/cDCE-8

ATGAGCTTAATTGATATCGGCATTGCAGCTATCGATCGAGCGGATAGCCTAACTGATCTTCT  
GACTATTCTGGAGGCTTCCAAACCCGCTAACGACACCCGGAATCCTAGATGTTATTGAAGTTT  
GGTTCAGTTTCAGCGCTTCAGGTGTTAAAGTAGGAACTTTTTATGGTTCTGGTACAAGTTATA  
CAGGGAGAGATTATGAAACTATAGGGTCAGTAGCTTCTGGGGCAAAGCGAACATTTACAGG

TTTATCTATAGATGTAACCTACAGGAGATTTAATAGGAGTTTATTATTTCAGGGGGCCATCTGG  
AGGTTGATACCTCTGGGGGTTCTTGCCTTATATATAGTAGCGGAGATGCTTTCGGCAGTACT  
AAAACCTATAGTTCTGAGAGTTTCCCGATATCTCTTTATGGCACTGGTGCAACTACCAGTAG  
CACTTTTGAATTGTCTGTACCGATGGCTTAAGCGTAGGAGACAGCAACAAAGGCAGCTTAT  
CTTTAAACCTATCTCTGTCCAGACGGGCTTAAATCTGGCGAATCCCTCGGTAGTACAAATACT  
ATCTACCCGACTATTTTCAGACGGGTTATCTTTAAGTGAGAGCTTAGCCTCTTTGCTAAGAATT  
TCCCCGTCTCTTTCTGATGGAATTGTCTTAGGGGATGCCCAAGGAACTCAGCTAATAGCCAA  
TACAGAAGTTAATGACGGATTAATTTGGGAGACATCTTAAGCACTCAGGCAATCTTGAATG  
TTGCAGCTCAGGATGGGCTTATTCTGGGAGATACACCGCAAGGGAATATCAGTATTTTCTTG  
AGCCTCACAGACGGGCAAACGCTTTCTGATACAGTAGCAGCTGGTTTCTTAATTTCTTACTC  
TTATCGGACGGTATTTCTTTAACCGATACAACGGCAGCACAGGCTATCCATAACCCCAACCT  
TATAGATGGTTTAAATCTCTCTGATTTGCCCTCAGGTACCGCCCTGTTAAGTTTGGCAGTAGC  
CGATGGAGTAACTACGGGAGATACACCAAGTATACAGGTAAGTTTTTCAGATATCACTGGCTG  
ATGGACTGACTACCGGGGATAGTGGATTAGCCTCACTTATCCTTAACCTGCAAGCGTTAGAT  
GGCATTTCCTTAATGACACTACCTTTGCTAATCTGGTTTACCAATTGCTGGTGCAGACAGGG  
ATAAAGTTATCCGATACTCCATTAGCAAACGCCATATTAGCACTCTTGGCTCAGGATGGTTT  
ATCCCTTTCGGATAGTGCCCTTATTTCAGGCGCAACCATTTATAACCTGCTTCTTTCCGATGG  
GCTAACGCTCTCCGATTACCCCGGTATGACATGCACCCTTAATTTGATAGTTCAGGATAAATAT  
CTCACTTGGAGATACTGCCAATATTATCTGCCAGTTTTTTGAATCAGTAACCGACGGCTTCAA  
GCTGGGTGATATTTCCCTGAATTATATAAGTGGGCTTATTAAACTCACTCTCAATCTCTATGG  
ACGGGCCGGAACAGGAACAATACCAGCCCGGACTATCACAGTAAACCTGCTTAACCGCAGT  
TCGGCAGCAGAATTAAGCAGAGGGGCGATTACTCTGGGGCTGAAAGACCAATCCATAACCT  
TAAATACAAAACCTGAATAAATAATCAAAGGGAATGACCTTCAAAGACCAACCCCAAGTT  
GGTCTTTTGGTTTATAAAGGGAGGATTAAGTGGAAAATATTAAAGACGGATGCAAATAAG  
CGGTAAGTTCCTTACCGAGTGTTACCGCAAAGGCAAGCTCATCTGGAAAGAAGAAAGCCAT  
AACATAGTCACAACCGAGGGGCGTAACCGCATACTTGATGTGATGTTCCATGGCACTACCCA  
GATAGCAAACCTGGTACTGTGGGCTTGTGGAAACAGATACCACGCCAGACGCAGGTATGACC  
TATGACGTACCGACATTTACCGAGAGTACTGCTTATGATGAAGCAGCTCGGCCTGCCTTTGT  
TGAAGCGGCCTCCAGCTCTGGCTCGGTTACCAACTCAGCAAATAAAGCTGTGTTCACTATCT  
CAGGCACAAAGACAATGTACGGAGCGGCACTGTTTAGCATCAATAACCAAGGAGACCATAC  
TGCTGGGGCAGACAATGTACTGTACTGCTATTCCAAATTTGCCTCCGGGCGTCTGTGGGTAG  
ACGATGACGTAATTAACCTGACCTACACAGTCACTGCTGCTGATGATGGTGCATAAGGGAGG  
CTGATTTATGGCTACCTTAACAATACCGAACAGTGATAAAGGTTATACCCTGCAATTTACTG  
TCCATGATTCTACAGGTGTAGCAAAAAATCTGACCGGGTATGCAATTAATTTGAAAGTCTGG  
AAGCCTGGCGCACCTACGACCTTGCTTGTAACCGGGGCTTGCACAATAAGCGATGCTGAAAA  
TGGTGTGTTACCTATACGTTGACCGGAACAGACTTTGCTCTTACGGGTACTTACCATGCCGA  
ACTGGAATTAACAATAGTATCAGGTGGAGTAACAACCTGTACGGGAAAGCACCGGCAATTTTC  
AGCATTACTGTAGTGGAGAGTGGCTAATATGACAGATTATTGCACTCTTGAAGAAGTTAAAA  
GAGAACTTAATATTCCAGGTGGCGAGTCAGACGATATACTCCAAGCATTAAATAGGGCAAAC  
TAAAGACCTCATAGATAAGTTCTGTAACCGAAGTTTTGACAGCGTTACCACTACAAAGTACT  
TCGACGGAACCGCCAGCCATTATGTATTCCAGATTTGATTACGCTCACCAGTCTCAAACCTG  
GACACAAACGGAGACGGAGTTTACGAGGCCACTTTAACCACAAGCGATTATATTCTTTACCC  
CCTTAACAGCACACCCAAGGAGTCCATTAGAATAAATCCTAATGGAAACTATTCCAGTTTTG  
CCTCTGGTATTCCAAGCGGAGTTTCTATCACAGGAACCTGGGGTTATGCCTCTACTGTACCA  
GGGCCAATACGCAGGGCCAGCATAATACAAGTACAACGCTGGTATAAACGTAAGAGACCG  
CCTTCGCTGATGTAGTGGGAGTGCCTGAATTAGGCGAAGTGCATTACTACAAGGGGCTTGAC  
CCAGACATACATTTGATAGTTCAAGCCTATCGCAAGCAGAGGTATTTTTAATGGCCATCAAT

GTCCAGGTACTTGGTGCTGAAGAAATTATTAAGGCACTCACTAACAAAGATATCTTATCTAA  
TGTAACAAAGAGCTGTCTAAACTAGCAATCAAAATGGCAAATCGAGCCAAGAAGGCAACT  
GTGGTAGATACAGGGCGCCTAAGAGCATCAATCGCAACCCAGATGTTAGACCTATCAGCTG  
AAATAGGCACAAATGTTGAATATGCCCTTTTGTGGAATTTGGCACGTCAAAGATGGAAGCC  
CGCCATATGGAAGGCAGCACCAAGGTA CTCCGGTGAGGGTATGTTCAATTACACAGTCAATA  
ATTCGCAAGAAGACATAGACAAATTCAGCGATGAATTGGGAAAAATCATGTCCGATAGGTG  
GCCAAAATGAGTGTAGAAATAATAGGGAATGGCCTCAAGACAAGGCTACAAACCATAACCG  
CTCTCAAGGCGGTTTTTTCTTGCTCCGAAATACCCAGTCAGTTAATAGCTTTCCGACTGCC  
TAATATTCCACACCGGTACAGAATATGACCAGACGATGGGTGCTACCAATATGCAACTACAT  
CGCTTTAAGGTA AAAATCTGTACCCAAACCGCAGACCAGCCAAGCGGGCTTAACGCTCTGCT  
GGACTTCGTGGA AAACACAGGCGCTAACTCGGTTAAGGCGGCAGTTGATAGTGACGTTACC  
CTTGGTGGTAAATGCGATACAGCAAGAGTCATAAGAAACTCTGGTCAAGGGACGTTTAGCA  
TGGGTGGACATGTTTATCTGGGAACAGAATTTGAAATTGAAGTATGGGAATAATAGGAGGA  
TTACATGGCAGTTTTAAGCGGTAAAGCCGGCAGGTA ACTGTGGGTGGTGCCACAGTAGCC  
GGTATTAATCATGGCAACTGGATTACACGTCTGAAGTGCTGGATAGCACAGATTTTGAAGA  
TGTGGGTGTACGTACCTTTGCGGCAGGATGTTCCAGTTGGTCTGGCAGTTTTTGAAGGCTACA  
AAAAGGGTGCACCTCTAACCATTGGTTCTGAAGTGTCTTTGGTACTCAAGGAAAGCCAGACT  
GCGACTCAGCAGTGGACAGGACAAGCAATTGTA ACTGGTATCCACCCCGCAAATAGTATAG  
ATGGGCTGACGGCCTATTCATACGATTATCAAGGCACCGGGGCACTTACTGTACCTACAGCT  
TAAGGAGTTAAAAAATGAGTGTGTATCGGGTAAATTAGGCGGGGTATTTACATCCGCCTTA  
CTAATTGAGA ACTGCGAGGCAGCTTGGGACGAGCTGGTTGATGGTGTATGTTACCGCTTCAGC  
AGATAGCACAGACGTTAAAGTGGGGGCTTACAGTGCCAAGTTCGCTTGTGCAGCCGGTCTGG  
GTGCAGGTGACATTATTGCTGCCAATGACATCGCTAGCAAAGACCTCTCGGCCTACAAGAAA  
ATATACGCATGGGTGAAATCCAGCGTGGCACTAGATGCCGGCGATGTTCACTCTTACTGGA  
TGATACCGCCAGTGTGCCAGTGT TTTGAAATCACTTAATCTCCCCGCTTTAAGTGCTAACAC  
GTGGACACGTGTATTGCTGGACTTAGGAGACGCTAGCAGTTTAACTGCGGTCATCTCAGTCG  
GGCTGAAGCAAGTAGTTGATAAAGGTGCTTTCAACCTCTGGATTGACGATATTGAAGCCCTG  
AAGGCTATCGCTGGCATTAAAGTCATGGCAGTTGGACTATACGGTGGATATTCTGGACAGCAC  
ATCTTTTATAGATGCCGGTGCCAGAACATTCTCTCCCGGTAGTACTCAATGGGGAGGCTCAT  
TTGAAGGGTATAAGTATGGTGCCCTCTGGGTATCGGGTCTGAAGTAATATTAGCCCTCGCA  
GAAAGCGCTACCACTGGTCAGGCATGGATAGGAAACGCATATATAAGCGGCGCACATGTGA  
CCTCAAGCCTTGATGCTCTGGTGACTTATTTCGTACGACTTCCAGGGGACCGGGAGTGTTGAG  
GTTGCCTCTTTGTAATGCGTAACCTAGATGAGACAATTGTCTACCTGATGAGAGTTTACAAG  
TGGCCGCTGGAATATACCCGCAATCTGGTACGCACTATGCCTGTCAAAGACTTAAACATTCT  
TATAGCCGAGACCGATTATCAGGAACGTATGGCCACTTATCAACAGTCATACAATTTTGCCT  
TAATCCTCTCCGCAATATGCAGTTCAGAAAAACGTAAATACAAACCCTCAGACTTTATTGGC  
AAACAACCTGAAAGGAAGATAAATGTCTCTAAACGAAGACCCCAA ACTGAGGAAGATACAA  
CTGGGGGAAACCTTTTTTACACTCTCCCCTCTGAACCTGAATGTGCTTGAAGATATAGAATG  
CGAATTTGGTTCTACTGGTGCTATGGTAACAGCCTTGCAAGACAAACCTGTATCCCACTCA  
AGAAAATCCTCTGGATATTGATTAAGGATAACCATCCGGATATGACTCCCGATAGCATTGGG  
CGAATGGTGAATATCAGGACATAGAACGGCTAAATGAGGCCATTGCTGAAGTCCTGAAGT  
GAGGTAATTATGGCTAAGTCTATTGCCGATTTGGTTATTA AAAATAGGTGCAGATACCAAGGA  
CATGGAAGCAGGCCTTTCTCTGCTCAGGTA AAACTGCAGAACTATCCGAAGGTGCCAAA  
AAAGCCGGAATAGGTCTAATGGCAGTTGGAACGGCTATAACTGGTTT TAGGTATAGCTGCCGT  
TAAATCCTATGCGGAAACCGGTGATGCACTGTCAAAAATGGCTACCCGAACAGGTATTAGTG  
CACAGGCATTATCAGAGCTGAAGTACGCCGCACAGATGTCAGGAAGCAGTATTGAAGACCT  
TGAGACTAGCGTTAAGCGCATGCAAATGTT CATGGCAGATGCTACTGAAGGGTCTGCACTCG

CAACCGATACGCTGGATAAGCTGGGATTAAGCTCACTGACCTGCAGGGATTGAACCAAGA  
AGACCAGTTCTTAAAATTATCCTATGCGTTGGCAGATGTAGATGATGCAGGGCAGAGAGCCG  
CACTGGCCTTTGCTTTATTTCGGGAAAAGCGGGACGGACTTGTTCCTATGTTTGCTGACGGCT  
CGGCAGCATTAGCAGGACTGAGGCAAGAAGCAAATGACCTTGGCGTTACAATGGATGACGT  
CAGTGCCAACAAGGCTGCTGAACTTGGAGACTCAATTGAGGATTTAAAATTTACTTTTGACG  
GTATGAAAGTTCAAATAGGCGAAGCACTGGCCCCAGCAGTTATCAATCTGGCAAATAGTTTA  
ACTGAGCAATTA AAAACCAGCCATTGCATGGTTATCTGAACATCCTGAAGCCACAGAAGCATT  
TATAAAATTCGGTGCTATTTTCTTAGCAGGTGGCGTATTAATGATTGGTATATCACAAGCGTT  
AAAAGCATTTC AAAGTATCAAAGCCGCCATCATGGGAGTAAGCGCCGCCATGGTGTTCCTTC  
AGGCCCTGACAGGTGTTGGTCTTGTGAAGGCGTTAGTTGGAGTGGCAGCGGCAGGTGCCATT  
ATCTTTGGCATGAATAAGGTTGTAGAAGCTAATACAGAAGATATACCTGGGTTTGCGGATGG  
CGGTATCGTAACTAAACCTACGCTGGCCATGGTGGGAGAAGCTGGCCCTGAAGCGATAACC  
CCTCTCGGACAAGGATTTGGCACTACTGTAAACGTTACTGTTCAGGGTTCGGTTATGTCTGA  
ATACGACCTAGCCCAGAGTATCCGCTCTGCCCTGCTACAAGATAAATCACGAAACGCTAATT  
TAGGTCTGGTCTAA

>KBDCA1-9

ATGGGTAAACACGCGCTCCTCTCGGCTTCCTCAAGTCACCGATGGCTCAACTGTCCGCCGTC  
CGCTCGGCTCTGTGAGCAATACGAGGACAATGGCAGCGACTACGCCGCCGAGGGTACGGAT  
GCCCACTCGCTTGGTGAGTACAAGCTAAAAACAGCGCTCAACATCAAAGCAAAGACCCGA  
CCACCAACCTGACCTACA ACTCCGAGGAGATGGAAGAATGTGCCGCCGGTTACGCCGCTTAC  
ATCCTCGAACTGCTGGAGACAGCAAAGCAGACCTGCACCGACCCCGTTGTACTTATCGAGCA  
GCGGCTCGACTTCTCCAAGTATGTGGAGGGCGGTTTCGGTACCGGCGACTGCGTGATAATCG  
CGGACGGGACGCTCCACATCGTGGACTATAAACACGGTCAGGGCGTTCTGGTGGAAGCGAC  
CGACAATCCGCAGATGATGCTATATGCCTTGGGCGCTTTGGAGTTGTTCGACGGCATCTACG  
ACATCGACAAGGTGTCGATGACCATCTATCAGCCCCGCCGAGACAATGTCAGCACCCACAC  
GGTTTTCAAGAAATCGATTTACCAATGGGCGGAAGAAGTCCTAATACCGACCGCCAAAATTG  
CCTATGCAGGCGGCGGCGAGTACA ACTGCGGCGAATGGTGCCGGTTCTGCAAGGCTAAGCA  
AGAGTGCCGAAAACGAGCCGAGCGGAACATGGA ACTCGCCAAGCTCGAATTCAAACGCCCG  
CCATTGCTGGAAGACGATGAGATCGAGTCAATCCTCGGAAAGATAGACGACCTCATCTCTTG  
GGCTTCCGATATCAAGGACTACGCCCTGCAGGCCGCCCTCGGTGGAAAACGGTGGTTCGGTT  
GGAAGGTGTCGAGGGTAAGAGCAACCGCAAATATGTCAATGAAAATGCCGTCCGCCAGAC  
AGTTCAATCCGCAGGCTACGACCCTTACGAACACAAGGTGATGGGCATCACCGCAATGGAA  
AAAGCTCTCGGAAAACCCGGTTTCGCCGATTTGCTCGGCGGTCTGGTTCGAGAAGCCGCAAG  
GCAAACCGACGCTCGTGCCGGAGGGCGACAAACGTCCGGCAATCAATACTGCCAAAACGA  
TTTTATGGAGGTAAATACCAATGGCTAATCAGACAATGAACCGCAAAAACCCGAATCCCAC  
CCCGAACCCGACCAAGGTCATCACAGGCGAATCCAGGCTCTCCTACGCAAACCTGTGGGAG  
CCGAAATCCATAAACGGCGGCACGCCGAAATACTCGGTCAGCATCATCATTCCAAAGAGCG  
ACGCACACACTGTCGCCAAGATTAAGGCGGCGATTGAAGCGGCATACCACGAGGGCGAGAC  
CAAGCTGAAAGGCAACGGCAAGACTGTTCCACCCCTCGCTTCCCTCAA AACTCCGCTCCGCG  
ACGGTGACATCGACCGACCCGACGACGAAGCCTACGCCGACAGCTATTTCAATTAACGCCAA  
CAGCGGCACGGCGCCCGGTATCGTCGACCATGACTGTGAGACCATCTTCGAACGCTCCAGA  
TTTACAGCGGCGTGTACGCAAGAGCCAGTGTAAACTTTTACGCTTTCAACTCGAACGGAAAC  
AAGGGCATCGCCTGCGGGCTGAACAACATCCAGAAACTGTGCGACGGCGATCCGCTCGGCG  
GCAAGCCCAGGGCCGAAGACGATTTCCGCGACCGAAGACGATGAAGACTTCCTCGGCTAACC  
ACATTACACAGGACTCCGGAAGGCGGCGGGA AACTTGCCGCCTTCTTGCCTTATGGAGGGCT  
TATGAAAACACTGTCAATCGATATCGAAACCTTTTCCAGCACCGACCTGAACAAGTGCGGTG

TGTATAAATATGCCGAGTCACCGGATTTTGGAGATTCTGCTGTTTGGCTATTCCGTGGACGGAT  
GCGAGGTACAGGTCGTGGACTCCACGGCAGGCGAAACGCTTCCGTTCGAAGTCCTCGACGCT  
CTAACCAATGATGATGTGCTGAAATGGGCGTTCAACGCCAATTTTGGAGCGGGTATGCCTGTC  
GCGTACTTATCTGATATGGGTATATCCCTTGACCCATTCGCCGATAGCCATTGCTCATCTCA  
ATACCTTGGTAAGTCGAAATACCTAAACCCCAAATCGTGGCGTTGCTCTATGGTGTGGTCGG  
CGTATATGGGCTTGCCTCTTTCGCTTGAAGGTGCGGGAGCTGTCTTGGGCTTGGAGAAACAG  
AAGCTGACCGAAGGCAAGGAATAATCCGCTATTTCTGCAAGCCGTGCGCCGCAACCGCCG  
TCAACGGACAGCGAACACGCAACTTTCCTGACCACGCCCCGATAAGTGGGCGGCCTTTAAG  
GCATAACAACCATCGCGACGTGGAAGCGGAGATGTCAATACAGCAGCGGCTCGCAAACCTTC  
CCGTGCCGGAGAGCGTCTGGGACGAATACGCCCTTGACCAAGAAATCAACGACCGTGGCGT  
GGCTCTGGATATGGTTCTGGTACGAAACGCTATCGCTGCCGACGCCCGTTCAAAGGCCGGAC  
TTACCCGTAGGATGAAAGAAATCACGGAATTGAGCAACCCGAATTCCGTGCAGCAGATGAA  
GCAATGGCTCTCGGAAAACGGCATGGAAACCGACACCCTCGGTAAAAAGGCCGGTCACTGAA  
ATGTTAAAAACCGCGCCGGAGCGCCTCGGTGCGGGCTTTGTGCTCCGCCAGCAGTTGGCAA  
ATCCTCGGTCAAAAAATACCAGACGATGGAGAACGCCGTCTGCACCGACGAGCGGGCAAGA  
GGCATGTTCCAGTTTTATGGCGCCAACCGAACCGGCAGATGGGCCGGGGCGGCTGATTCAGAT  
GCAAAACCTCCCGCAGAACCCTTGCCCGACCTAGAACAGGCACGGGCATTGGTGCGTAA  
GGCGACTTTGCCGCTTTGGAAATGCTCTACGATTCCGTGCCAGAAGTTTTGTCTGAGCTCATT  
CGCACGGCGTTCGTGCCGAAACCGGATCACAAATTTATCGTAGCGGACTTCTCGGCGATTGA  
AGCCCGCGTCATCGCCTGGTTTGCCGGGGAACGTTGGCGCAACGAGGTCTTTGCCACCCACG  
GCAAGATTTACGAAGCGTCCGCAAGCCAGATGTTCCACGTCCCGATCGAGGAAGTCACTAA  
AGGCTCGCCTTTGCGCCAAAAAGGCAAAATCGCAGAACTCGCCCTCGGTTATGGCGGCTCTG  
TCGGCGCGCTCAAAGCGATGGGCGCGTTGGAAATGGGCTTGCAAGAGGACGAGTTACAACC  
ACTCGTCACAGCGTGGCGGGCATCAAACCCAAACATAGTACGGCTCTGGTGGGACGTGGAC  
AAAGCGGCTATGACGGCGGTCAGGGACAGAACCGTTGCCAAAACACATGGCATCCGTTTCG  
GCGTTCAGAGCGGGATGCTTATTATCACCTGCCTTCGGGACGGCGGCTCGCCTATGTGAAG  
CCACGTATCGGCACAAACCAATTCCGTTTCGTATTGCGTGACCTATGAGGGTGTCCGGCGGTAC  
AAAAAAGTGGGAGCGGCTTGAAAGCTACGGGCCAAAATTCGTAGAGAACATCGTGCAGGCA  
ACAAGCCGCGACATTCTTTGTTTTGCGATGCAGGCGCAGCGGTGCTGCAATATTGTGATGCA  
CGTCCACGACGAAATGGTCGTCGAAGCCGACCGCCGTATGTCAGCCAAGTTTTATGCGAAC  
AGATGAGTTGCACCCCGCCCTGGGCGGAGGGGCTTCTGCTCCGTGCCGATGGGTACGATTGC  
CCATTTTATAAAAAAGATTAATTGCCCGGTTGCCAAACTGCCCTCGCTGTCTGTGGATGGT  
GAGGGGTTACAGCCTCTCGGAAAAATCTATTTTCAGGAGGTTTGGTATGAACGAATTACAA  
GTGTTCTCCTACGAGGGGAACGAAATTAGGACGGTGCGCCAGGGCGACGAAACACTCTGGG  
TGTTGAAAGATGTGTGCGATGTGCTTGGGCTGTCCGACACGAACAAGGTGGCGGAGCGTTG  
GACGGCGATGAGCTGACCCGAATCAAATTCGTGTCAGGTGGTTCAGACCCGTGAAATGTATG  
CCGTACGCGAAAGCGGTCTCTACAACGTCATCCTCCGCTCCGAAAAGCCCAGGCTAAAAG  
GTTCAAACGCTGGGTACCCACGAAGTGCTTCCGACCATCCGCAAGCACGGTGTGTATGTCA  
CTCCCGCAAGCTGGAAGAGATCATGAACGACCCCGACGCTTGGATTAAGGTGCTGACGAC  
TCTTAAAGCGGAACGTACCGCCAAGGAAAAGCTTCAGCTGGAAGCTGCCAAGAACGAGCCG  
AAGGTCGTATTTGCCGACGCCGTGTCCGTGTCCGACGGAACCTATCCTCATCGGCGAACTGGC  
AAAAATCCTAAAAGGCAACGGCATCGAAATCGGGCAGAACCCTGTTTCGATAAACTGCGT  
CAGGATGGCTACCTCATCAAACGTC AAGGCACGGACTACAACGCCCCGACGCAGAGGGCGA  
TGGAATTGGGACTTTTCAAGGTTAAGGAACTGCCATTACGCACTCCGACGGTCACGTCACC  
ATCAGTAAAACCAAAAGGTCACGGGCAGAGGTCAGGAATATTTTCATCAATTTTTTCTTGG  
GAAAGGGGTAACCGAAAATGACAACTGAAAAAAAGCAAGCCATAAAAACGGCTCTGAGGA  
AAGTCGGCAAGGCAGTCTGGTCCGCGCTCCCTGGGTGTTTCATGTGGATTGGGTTGACCTGC

TTGTTCTCGCTCCTGCTTATTAGTGCGGATAAAAGCACGGAACGAACCAAACAGCTTGCGGC  
ACTTGAAGCTGAGAACGCGAGGTATGAATCGGAAAACGTACGACTTGATGAGGAGGTCAAC  
TGGCTTCGCTCCCTTGTTCGAAAGAATGGAATTTGAGGAGGTTGGCGATGGACAGGGCGAAC  
ATGAGGGATATCCCGACCTAACCGCTTATGATGCGCTCTCCAGTGTGGAACGGGATGAAAA  
AGCAGGAAAGCCATATCTACCGCTTGTCTATATCGCTTCGCCGTTTTCGCGGGCGATACGGAAC  
GGAACACGGAACGTGCGCGGGGCTATTGCAGGTTTTCGCGTACAGTAAGGGGTGCATTCTCTT  
GCCCCGATCTGCACTACCCGCACTTTATGGACGACAGCGACAAGGCGCAGCGGGATCTTG  
GACTACGCTTCGCCCTTATCCTGCTTGGCAAATGCGATGAATTATGGGTTTTTCGGTGAGACTG  
TCAGCGACGGAATGAGGCGCGAGATTTCAAAGCAAAAAACGCGGTATGCCAATCAGATA  
TTTTAACGGCAGATGCGAGGAGTTACGCAATGCGAGATCTGAAAATATCTACGGCGACA  
GCCGCTGTTCGAAGCGGTGGGTCAACAAAAAGACTACATTTGAGGAATTGTGCGAGCGGTT  
CAAGCTGACCCGACGTACCACAGAGACGGTCACTGAATATCAAAAATTCACCAAAGACCCG  
CGCGATGCCGCAAAGGACGTTGGCGGCTACGTCCTCGGCCACCTCAAGAGCGGCAGGCGCA  
AGAAGGATACGGTAGAAAGCCGTTTCGGGGATAACGCTTGATGCCGATCACGCTGGTAACGG  
CTTCATCGACACTGTAGAGATGCTGTTCTTCATAAGTGCAGCGGTCTACTCCACCCACAGTCA  
TACGCCGGAATCCCGCGGCTCCGCGTGGTCATCCCGCTCTCCCGTGACGTTACACCGGACG  
AATATGCAGCACTCTCCCGCCTGGTTGCCGACGAAATCGGTATGGACTTTTTTGACGATTCTA  
CCTACGAGCCGGAACGCCTGATGTACTGGCCGTCCACCCCGTCCGGCGGAGAATATGTATTT  
AAGGTTGTTGACGGCGACGAGCTCGACCCCGACGAATACCTTGCAAAGTTGTCCGACTGGCG  
AGACTGCTCGCTCTGGCCGACATCGAGTCGCCAGTCCGAGGTGATACAGCACAGCATCCGGC  
AGCAGCAAGACCCCTTTGCCAAAGATGGCGTGGTTGGGACGTTCTGCCGGGCTTATGGCATA  
GAGGACGCAATCGCAACATTCTTACCCGACATCTACGAGCCTGCGGCGATGCCCGGACGCTA  
CGACTATATCCCGGCCGACAGTTCATCGGGTGTGGTTCTCTACGAAGGCAAATGGGCGTACT  
CCCACCACGCAACCGACCCCGCCTGTGGCAAAGCTGCTCAATGCCTTTGACCTCGTCCGCATC  
CATAAATTCACGACCTTGACGACAAGGTAAGCTTCAAGGCAATGAGCGGGTTTTGCCCTGA  
AAGACGAAAGGGTCAACACCCTGATTGCCGAGGAGCGCATCACCGCCGCCGAGACGGAATT  
TGCCGAAGGCGACGACTGGATGTCACGGCTCCAAAGGGAAAAAGCGGTATTCTTTGCAAC  
ACGCTCGGAAACCTTCTCCTTATCCTAAACAACGATGACGCCATCGGCGGCATCCGCTACAA  
CAAATCGCCAATCAAATATACGGCGAGAACCTACCGTGGGAGCGACCTCACCCGTCTTGGC  
GCGACGCCGATACCGCCAGTTGGTGGCGTATGTTGACAAACGTTACGGTACATTTTCGGCT  
CGCAACTATGAACTGGCGCTCACCAAAGTCGCAGACGACCGCGCCTACCATCCGATACGTG  
AGTATCTGAACAGCCTGCCAACCTGGGACAGGATTCACCGAATGGACACCCTGCTCATTGAT  
TACCTTGGCGCGGAGGATACGCCCTACACCAGAGCTGTTACCAGAAAGACGCTCGTTGCGGC  
GGTTGCCCGAATCCTGAACCCCGGCGCGAAACACGATTCCATCCTTGTGCTGAACGGCAAAC  
AGGGCGTCCGGAAAGTCCACGCTCTTTCAAGGCTCGGCCGCAATGGTACTCCGACAGCCTC  
TCCATATCGGATATGAAGGACAAGACCGCTCCGAAAAGCTGCAGGGCTACTGGATACTCG  
AGCTCGGGGAACTCGCGGGCATCAAAAAGATGGACGTGGAGACGGTGAAGTCGTTTCATCAC  
CCGAACCGACGACAAGTACCGCCCTCCTATGGCCGGGCGGTGGAAAGCCACCCGCGCCAA  
TGCGTCATCGTCGGTACGACCAACTCGGATGGCGGATTCCTGCGCGACATCACGGGCAACCG  
CCGCTTCTGGCCTGTTTCGCGTTTCCGCGAGGGCAAATACCGCGCCTGGGAACTCACGGATA  
TTGACCAGATTTGGGCGGAAGCCCTTGTTAAGTACACCGAGGGCGAGGAATTGTTCTCAA  
GGAGATATCGCGTTAGCGGCTTTTGGCGAACAGCGCGACGCTATGGAGAATGACGACCGCG  
AGGGTTTAGTGGCTGAGTACCTCGAAACCTACTCCCTGATAACTGGGATACGATGGACATC  
TACCGCAGGCTCGAATACATCCGCTCGACCGACGACCCACGAAGACGAAAGGCACGGTGC  
GGCGTTCTCAGGTCTGCGTGATGGAGATTTGGTGCAGTGCTTTGGAAAGTCCCGTGAGTCC  
ATCAAGAAAGCCGACTCCTACGAGATTGAGGGCATCCTTAACCGGATCGGCGGCTGGGCGA  
AGTACGAGGGCAACAAGACCGGCAAAAAGGCTGTCCCGATGTACGGCGTACAGCGTGTGTT



CGTGAGGTCAGAATGATTACGGCGCGATTGCCCATGATTGCCTGTCGGGGCTTCGGCAACCG  
TTATCGGCAAAGTCGCAAGCCCCGAATAAACCAACATTCTTACATAGCAATTGCCCATATTG  
CCGATGTTCTCCCTACTAAATCGTATTTAAGTAGTAATAATGGCAATTGGCATATGCAATAC  
ACACGCGAGGGATTTATAGGCAGAATCGGCAAGTTGGGCAATGTGAAAAGCGGAGGTGCTT  
ATGCGAGAAAAAATATTGGAGCGCAAGCTCACGGAGGCTGTAAAGGCGATGGGAGGTATCG  
CGCCCAAGTTCGTAAGCCCCGGATTGACGGAATGCCCGATCGCCTTGTGCTTCTCCCCGAC  
GGAAAGTGCCTTTTGTGGAAGTGAAGCGGCGTGGCGAGAAATCGCGACCTTTCAGGAAG  
CAAGGCATGGGATGTTACGGCGATTGGGATTGGAAGTCTATGTCTTGGACGATTATCAGCAG  
ATCGGAGGGATGCTTCGTGAAATATCAACCGCATAACTATCAACAGTATGCCACGGCGTTCA  
TCGAAGCGAATCCCATTTCTTGCCTTCTCCTCGACATGGGGCTTGGCAAACGGCGATTACG  
CTGACCGCCCTAACGATCTGCTGTTTGACAGCTTCGAAGCCATAAGGTTCTGGTCATCGC  
ACCTTTGCGGGTCGCCCCGCAACACTTGGCCGGAGGAACTGAGAAAATGGGAACACTTCTCC  
GATCTGCTGTTTTCCGTGGCGGTTCGGTACGGAAGCGGAGCGCAAGGCGGCACTTTGGAAAA  
GAGCCGATATTTATATCATCAACCGCGAGAACATAACAATGGTTGATTGAGGAAAGTGGTCTG  
ACCTTCGACTTCGATACAGTGGTGGTCGATGAGTTATCCAGTTTTAAGTCCCATCAGTCAA  
GCGGTTCCGGTCGCTGATGAAAGTCCGCCGAAGGTGAAGCGTATCGTAGGGCTGACGGGA  
ACACCAAGCAGCAATGGCTTGATGGACTTGTGGGCGGAGTTCGGGCTTCTGGATATGGGTCA  
GCGGCTCGGACGGTTCATCGGGCAGTACCGCACCGACTACTTTGCCCCGATAAGCGCAACG  
GTCAAGTCGTCTTCAGCTACAAGCCCCTGCCAGACGCCGAAAAGCGGATATACGCCAGAAT  
CGCCGACATCACTATCAGTATGAAGTCCACCGACCACCTGAAAATGCCGGAATGGTGACC  
GCCGAATACCCAGTGCGGATGACGGAGCCGGAACAGGAACGGTACGACGAAATGAAGCAG  
GATTTGGTATTGCACCTTACCGAAGGCGAAGTTACCGCCGCAACGCCGCAGCTTTGTCAA  
CAAACCTCTGCCAGATGGCGAACGGAGCAGTCTATGGCGACGACGGAGAAGTCCACCACATC  
CACGACCGCAAGTTGGAGGCACTGGAGGATTTAATCGAGGCCGCCAACGGGAAGCCCGTTT  
TGGTCGCTTATTGGTTCAAGCACGATGTGGAGCGGATTGCCGCAAGGTTGAAAACGCGACAC  
ATCCCGTTTTCCAAGATGGACTCGAGCGATAGTATCACCCGTTGGAATCGCGGTGAGTTGCC  
CGTCGCCCTCATCCACCCCGCTTCGGCGGGACACGGGTTGAACCTGCAGTCGGGCGGCAACA  
CGATTATATGGTTCGGGCAGACGTGGAGTCTGGAACCTTACCAGCAGACCAACGCAAGACT  
CTGGCGGCAGGGCCAGCAATCTGAAACCGTGGTTATCCACCACATCGTCGCAAAAGGAACA  
ATTGATGAGCGTGTCTCTCCGCCCTCTCCGAAAAGACAGGTCGCAGACCGCCCTTATCGA  
CGCGGTGAAAGCAAATCTATGAAAATCTGAGACAATAAAACGACAATCCGTGCCAATCCG  
AGTGAATTTTATTATTCGGAGGTACGACATGAGCACAACAGCAGTGAAAAAGTATCTGTGCG  
AGGCGAGATATCTTGATATGCGAATTGACTCAAAAATCCAGCAGGTTGCCGCGCTTAACGAC  
CTGGCGACAAAATGCACCTCTACACTGACCGGGATGCCGAGAAATCCCAATCATGGCACGT  
CCACAATGGCGGATGCCGTTACGAAGATTGTGGACCTGCAGGCGGAGATTAACCGCGACAT  
TGATGAGCTGATCAATTTAAAGAAAGAAATCACAGATGTCGTCAAATCCGTTTCCAACCCGG  
AGTATCAGACCATCCTTGAGAAACGCTACTTATGCTTCCTCTCTTGGGAACAGATTTTCAAGT  
GACATGAATTACAGTATGCAGTACACGTTCCGCATGCATGACCGGGCTTTGACGGAAGTTGA  
TGCTTTTCTGAAAGTGGAGAGTCAAGTTGATTGAAGGAGAGTGCTTCTTTTGATATCATTAT  
AATGCGGAAACAGAATACAGAGAGCCTTCGTGGGAGCAATCCTGCGAGGGCTTTTCTTATGC  
CCCGAAGGTGGTGAATCTCAATGCCCTACAAACCCAGGCGTCCCTGCGTATACCCCGGCTGC  
GGTCGGCTTGCCGAAAGCGGTGGGCAATACTGCGCCGAGCATCAGAAGGTCATGGACAATC  
GCTATTACCAGTACGAACGCGACCCGGCTTCCAACAAGCGCTACGGTAGAGCTTGGAAAGCG  
CATCCGCGACCGCTACATCAAAGCGCACCCGCTGTGCGAGGAGTGCCAAAAGCAAGGTAAT  
CTTACCCCGCCGAGGAGGTACACCACATCCTGCCGCTCTCACGCGGCGGTGGCAACGAAGC  
CAGCAACCTCATGGCTCTATGCAAGCCGTGCCACGCCGCATCACAGTCGAGATGGGTGACC  
GCTGGCACGACCGATGAGGTTTGTATCACATTTTGATACAAACCAAAAATGTGTTACGAAAA

AAATGTAATAACGCAGTCCGCGACCCGGTGGGGGTATCAAAATCTCCAAAACCTTTTTTAAGC  
GGACAGCGGCGTGGGGCTTCGTGTTGAAAAACGCGGTTTCAAACGGTGGAATAGCCCCGGC  
ACAAAAGGAGTGTGATGAAAATGGCGAAAGACGGCACCTGCAGAGGGCGGCGCTCGTGCTGG  
CGCGGGCGCGAAAAAGAAGCCGCTCGCCGATAAGATTACAGCCGAAACCCCGGCGGCAG  
AAAACCTGACCGTGATGGAGTTTTCCGACACAGCCGACCTTCAAGGTCAGGGCGATGCCGGAG  
CCAAACAAAATGCTTGAAGCCGTACAAAAGGACGGCAAGACGCTCGTCGCAAGCGAAATCT  
ACAAATCCACATGGACGTGGCTGAACGAGCGCGGCTGTGCAGCGCTTGTATCTCCACAAGTT  
CTGGAACGCTATGCCATGAGCGTTGCCCGGTGGATTCAATGCGAGGAAGCGGTCACCGAGT  
ATGGCTTTCTGGCGAAGCACCCCACCACCGGCAACGCGATACAAAGCCCGTATGTGGCGAT  
GAGCCAGAATTTTCATGACGCAGACCAACCGTCTATGGTATGAGATTTTCCAAATTGTGAAAG  
ACAACTGCACAGGAGAATACAGCGGAGCCAATCCGCAGGATGATGTGATGGAGCGGCTTTT  
GACTGCTCGGAAAGGAAAATAATATGACTACTTACAAAACAGCAGAAAGCGTCTGCGCTGG  
ACACCCGGATAAACTGTGCGACATCATTGCGGACAGCATCCTCGACGCCTGTCTGCGCAAGG  
ACAAGTCTCCCGCGTCGCCTGCGAGGTTATGGCGACCAAGGGCAAATTATCGTTGCGGGC  
GAGATCACCTGCGACGGCAAAGTCGACATCCGCTGGGAGGTGCGTGAAGTCTCCGCAAGG  
TCGGCTACAATCCGTGGATGTTTACAGTTTTTCGTGTTTCGTTTATAAACAGAGCAGGGACATC  
GACGCCGGGGTGACTACTGCCCTCGAAGCCCGAAACGGCAGTGAGGAACGCTATGTCTCTA  
TCGGTGCGGGTGACCAAGGCACCGTGTACGGCTATGCCACAAACGAAACCCGAGAGATGCT  
TCCACTCCCGCTGGTGTGGCGCATCGCATTGTCAAGCGTGTGGATACCGTTCGCAAGGATA  
AAATTGTGAAAGGCATTTTGGCGGACGGCAAAGCGCAGGTTACGGTGGAATATGAGGACGG  
CAAGCCCAAACGCATAAAAACAATTATCGTTTTCCGTACAGCATGACAAGAACAAAACGCAG  
GAGCAGCTTTACTCGGACATCAAGCAGAATGTGCTGTGGCAGTGCTTCGAGGACTTTCCCTT  
TGACGATGACACCGAAATCCTCATCAATCCCTCCGGCAGATTTGTGAGGGCGGACCCGCCG  
CTGACACAGGGCTTACGGGCAGAAAGATTATGGTGGATACTTATGGAGGGATTGCTCTTCAT  
GGCGGCGGCGCATTCAGCGGCAAAGACCCCAAAAGGTCGACCGCAGCGGAGCTTACATGG  
CGCGGTACATCGCAAAAAACATCGTATGGAGCGACTTGGCTGAGAGATGCGAGGTCGCTCT  
TTCTTATGGCATCGGCAAGGCAGACCCCGTGGCGGTTAACATCGACGCTTTCGGCACGAGCG  
CCCTCACCAATGAAGAACTGCGTAAAATTGTGCTGTCCGTGTTCAACCTGCGCCCCGGCGGCA  
ATCATTGAAAAACTGCGTTTTCGCAATGCGATATACGAGGACACAGCGGTATACGGACATTT  
CAATTCCTGTCTCTTTCCGTGGGAGGATTACGATAGGTACAAAGAAATCAGAAAGGCGGCG  
GAGAAATATGCTGATAGAAAAGATTGAGACTGATCGGCTTATCCCCGCCGATTACAATCCTC  
GCAAAGACCTCAAGCCGGGCGACCCAGAGTACGAAAAGCTGAAACGCTCGCTTGAGGAGTT  
TGGCTATGTCGAACCCGTTATATGGAACAAGATCACCTCTCATGTCGTCGGCGGCCACCAGC  
GTCTGAAGGTGCTGCTTGATATGGGCATCACTGAGGTCGAGTGCCTGGTGGTTCGAGATGGAC  
GCCGAAAAGGAAAAGGCGCTCAATGTCGCACTTAACAAAATCAGCGGTGACTGGGATAAAG  
ACAAACTGGCTCTGCTTATCGCCGACCTGCAGGGCGCGGACTTCGATGTTTCGCTCACAGGC  
TTCGACCCCGGAGAGATTGACGACCTTTTCAAGGATAGCTTGAAAGACGGTATTAAGACG  
ATGAGTTTGATGTGGATGCGGAACTGCAAAAGCCAGCCGTCACCAAGCCGGGCGATGTGTG  
GCTGATCGGACGGCATCGGCTTGTCTGTGGTATTCCACAAAAGCCGACACCTTCACTGCTC  
TGATGGATGGGAAGCTTGCAAACCTCGTGGTGACCGACCCTCCGTACAACGTCAACTATGAA  
GGAACGGCGGGCAAATCAAAAACGATAATATGGAAAGCGGAGCGTTCTACGATTTTCTGC  
TGGCGGCGTTAACGAATACCGAAGCGGCGATGGCGCAGGACGCTTCCATTTATGTGTTCCAT  
GCCGACACCGAAGGGCTGAACTTCCGCAAAGCGTTCTCGGACGCGGGCTTTCAGCTTTCGG  
GTGCTGCATCTGGAAAAGCCATCGCTGGTGTGGGACGCTCGCCCTATCAGTGGCAGCACG  
AGCCTGTACTGTTCCGGCTGGAAGAAAAAAGGCAAGCACAACCTGGTACGCCGACCGCAAGCA  
GACCACCATCTGGGAATTTGAAAAGCCGAAGAAAAACGCCGACCATCCCACCATGAAGCCG  
ATTGCGCTCCTGGCATATCCATTATGAACAGCAGCCTCACAAACTGCATTGTGCTTGACCC

CTTCGGCGGCAGCGGTTCTACACTCATCGCCTGTGAGCAGTCCGACAGAATTTGCTTCACCA  
TAGAGCTTGACGAGAAATACTGCGACGTCATTGTAAAACGGTACATTGAACAGGTTGGGAA  
TGTAATAAGTGTTCGGTTATCCGCGACGGTGTACGATGAAATATGCGGAGGTATTCTCCG  
ATGAGTAAATTAACACTTGGCTCCCTCTTCGATGGCTCCGGCGGCTTTCCGCTCGGCGGTCTG  
CTCTGCGGCATCAAACCGCTCTGGGCTTCGGAGATTGAGCCGTTCCCGATACGGGTAACGAC  
CAAGCGGATACCACAGATGAAACACTACGGCGACATCTCCAAGCTGAACGGTACAGATTA  
CCACCGGTGGATATTATAACCTTCGGTTCGCCCTGTACCGATATGTCAGTTGCCGGGAAAAG  
AGCCGGTCTGGACGGAAGCCAATCCGTCTTTTTTATGAAGCAATACGAATTATGAAGGAAA  
TGAGGTGCAAGACCAATGGCAGATACCCAAGATACGCTGTCTGGGAAAACGTGCCCGGCGC  
ATTCAGTTCAAACCAAGGGGCCGATTTC AAGGCAGTCCTCGAAGCGGTCGTCAGCGTCACCG  
GGAAAACGCCGAGGTGCCTGCGCCTGACAACGGGCGGTGGTCTTACGCCGACTGCTACAT  
GGGAGACGGATGGTCGCTGGCTTACAGA ACTATCGACGCTCAATATTTCCGAGTACCCAGC  
GCCGCCGACAGAACTACCTTGTCGAGATTTTGCAGGCGAATGTGCCGGAGAAATACTATTT  
GAGCCGGAAGGCGTGTCAAGGAATTTTGCGCCGTGCGGCAGCCCGTGGCAAAGA ACTGCCG  
GAGATGCTGAGAACGGCTCTGGAACAACAGGCAGCGGCATAACCTGCCTGAACGACCAAGG  
CGGTGACCGTATGGATATCACCGAAGATACGACGGCTACGCTCCGCGCCGAAGCCCATCAC  
CCGCCCTGCGTCATGCAGTCGAGCGGATTCTGCACAGAGCATTCCGGCGAAGAGCCGTGGTGT  
GGGTTTGAGGAAGAACGCTCTCCACGCTCCGGGCCGGTGTTCGTGCCTGGTGTGCAATCG  
AAAACCATCCGACAGACGGCCGGTGTAAAGGTTCCGAGGATGGGATGGTGCAGACGCTCAC  
TTCCCGTATGGGAACCGGCGGCATGAATACACCGCTTGTCTGGACACGCCGAAAACGCTGA  
AAATTCGTTCCGGCTGTGAGGATGGCGGCAAAGGCGCGCTGATTCAAGACGATATGTCCGC  
AACCTCGGCTGTAACAATGACCAGACTGTTTTTGTTCCTACCGCTTACGGTATCTGTTCTGA  
TAAGAGCAACTCCATGCTGTGCGACAATCCGCACAGCGGTATATATGAAGCGGAAACCTCA  
CGTACTCTTGATGCGAACGGTGGCAACCCCGGCTGCAATCAAGGCGGTATCGCTGTGGTTGC  
ACTCCAAGTTCAATGATTGGACGTGAGGATAAAAACGGTCCCCAGGGCAGCGGTATTAAT  
GAGGATATCAGTTTTTCACTACGGCTGCCGACCGTCACGCGGTAGCATATTCGATGACGAC  
TGGCGGCTTTTCAGAGATACACAAGGAAAAAGCCGCCACTTTGATGGCACGGGATTTTAAA  
GACCTCCGCTTGTTAACCAGCCGACTATATTGTCCGCAGACTCACACCTACCGAGTGCGC  
CCGGCTTCAAGGTTTCCCAGACA ACTGGTGCCTGATCTCGGCACGGCGAATCCGAACGAGG  
AGGATATTACTTTCTGGGCGGAGGTATGGGAAACTCACCGCCGCATCATCGGCACAAGTGA  
AAAGCCCAAGAGCCGCAGGCAGGTTATCAAATGGCTGAACAACCCGCACTCCGACGCCGCC  
GAATATAAGATGTGGGGCAACGGGGTGGCACTCCCATGCGTTTTGTTTTGTTCTGTCCGGCAT  
TGTGTTATCTACACAAGAAACCGCTTAATTATCGGGACATTATTCTCCACATAAATAAGCTCT  
GAATTGCTTGATAAATCAGGCATTCAGAGTGATATATGTATGTACCGAAAAGAGAAAGGCG  
GTATAACAATGACAATCAACTACAATGTAACAGGCAGCGAGCGCAAACGGCTCGTGCAAG  
CAATCTCGGAAATCATGGAGTGCAGCCAAATATAAGGGCGCTCCGACCTTCGCCTACGA  
GGTGGACTATTTACCATCGACAAAACGGCGTCCTATCCTTCGATGACCGTGCCGACAGCA  
AGGAAATCGAAAAGCTCATCGAGGGTCTGGCGGAGCGGGGCTTTGAATTTGACGGGTACGA  
CAAGACTGTGCTTACCATTGAAATGCCCCGCTTGTCTTCTCCGACACAGCACTTGAAAATCT  
CAGCCGGCTGGTGGAAAGCAAAGGCTCGCTCATCAAAAAGGCACTGGGCGTTACCGACCTG  
TCTATCTAAAGGGTGAGGAGACGGTTGGCTTCCCGTGGTTCCCGATGCAAGCGACCCGGA  
CGCAGTAAAGGCTTATACCCACCTTGTC ACTGCGCTCTGTGAGATGGCGAAAACACAGAAAC  
GGGTCAGCGCGACCGACAAGCCGTGGACAACGAGAAGTACGCTTTCGCTGTTTTCTCCTC  
CGGCTCGGTTTCATCGGCTCGGAATATAAGGCGGAGCGAAAAATTCTGCTCTCAAAGCTGAC  
AGGCAGCTCAGCGTTCAAACAGAATAACTGCAAGGCGGTGGATGAAGATGAATAAGCTTCC  
CACCGCCTTCTTCGTTGAGTATCCATTTCCGATTGAGGACTTAATTCGCCCTTATTTATCGGA  
ATGGCTGAAACCATATATTGCAGAAAAGGAAATAAGGCTCAGTAAAATTGATTACGAAAAC

TTTATAACCGACTTATGTGTTGACAGATGGTTTATAGAAAAATACACGCATCTTTGTAGCAT  
AGACGAGAACGGAGTTTGGCATTGCGTTTTGGTAAGGCAAAAAGGAAAATCCGAAGGCGTG  
TTGTTTATGTCGGAAGGCAGAGTTTTTTCCTAAATGGGCTGCGTATTTGCCAAGTGAGGAGGT  
AGCTGAATGAACATACATCCTGAAATACTCAAACAATTAAGAGATTGCTTTACGCCCCGGAAC  
CCGTGTGGAGCTTATTCGTATGGACGATGTTCAAGCACCCGCGTAGGTACAAAAGGTACGG  
TCGTCCGGCGTGACGACATGGGTTCCATCATGGTTAACTGGGACAACGGCAGTGGTTTTGAAT  
GTGGTATATGGTGAAGATTTCTGCCGGAAGTTGAGGACAGCGATGGACAGTAAAGTTAAG  
GAACAAATACTCGGCATTCGAAAATTGGGTGAAACAAATATGTTTCGATGTGCCGAAGGTAC  
GGGAAATCGCCTTGCGGGAAGATTACTGCGAACTGGCGGTTTACCTCGTCGAAAACAAAGC  
CGCATATACGCGGTTTCATCCTAACAGGCGATGAGGAATAATAAAAAAGCATAACTGGAGAA  
CAGCGCCGGAACGGCTCTGTTTCTCGTACAGATGGATTTTCGAGGGCTTGCCGACGGCAGGT  
CTGTTTTTATGCTCTGCGAAAGGAGGTGGCGGGTATACGAAAACCTTAAAAAATACAATCCCA  
CCCGATTCAAAGCTACGGATTCGGTTTTATGACAAGGCCGCGCCGATTACGCAGTTGCTTTT  
GTCGAAGCCCTCTCCATACAAAAGGAACATGGGCAGGAAAGCCCTTTGAACTGATCGACT  
GGCAGGAACAGATTATCCGCGATGTGTTTGGAAACGCTGAAGCCAAACAGCTATCGGCAGTTT  
AATACCGCCTATGTGGAGATTCCAAAAAAGATGGGCAAATCCGAGCTTGCGGCGGGCGGTGCG  
CACTGCTGCTCACCTGCGGGGATAACGAAGCGCGCGCCGAGGTTTACGGCTGCGCCGCCGA  
CCGCAACCAGGCGTCCATTGTTTTCAATGTGGCGGCGGATATGGTTCGGATGTGTCCGGCGC  
TGGCAAAACGGGTTAAAATCCTTGATTCCATGAAGCGGCTCATCTATCTGCCGACCGGGAGT  
ATTTATCAGGTGCTGTCGGCGGACGTCGGCAACAAGCACGGCTTCAACACCCACGGCGTGGT  
ATTTGACGAACTGCATACCCAGCCGAACCGAAAACCTCTATGACGTAATGACCAAAGGCAGC  
GGCGACGCGAGAATGCAGCCGCTGTATTTTCTTATCACCACCGCCGGAGACAATCAGCACAG  
CATCTGCTGGGAGGTTTCATCAAAGGCTCTCGACATCCTCAACGGCAGGAAGCATGATCCCA  
CCTTCTATCCCGTCATTTACGGCGCGGGCGCAGGAGGATGACTGGACTGACCCCAAGGTGTGG  
AAAAAAGCGAATCCGTCGCTCGGCATCACGGTAGGCATGGATAAAGTCAAGGCGGCTTTTG  
AATCAGCACGGCAGAATCCCGCCGAGGAGAACAGTTTCCGTCAGCTTCGCTTGAATCAGTGG  
GTCAAACAGGCGGTGCGCTGGATGCCGATGGACAAATGGGACGCTTGCCTTTTGGCGTAG  
ACCCCGAAGCCCTGCGCGGGCGGGTCTGCTACGGAGGTCTTGACCTTTCCTCCTCCACCGAT  
ATTACGGCGTTCGTGCTGGTATTCCC GCCGAGGATGAGGATGACAAATACGTCGTGCTGCC  
GTTTTTCTGGATTCCGGAGGATAATGTGGATTTGCGTGTGCGAAGAGACCATGTGAATTACG  
ACATCTGGAAGAAGCAGGGATATCTTGAAACCACCGAGGGCAACGTCGTTTCATTACGGCTTC  
ATTGAGAGATTTATCGAGGAACTCGGCACCAAGTACAACATCCGTGAGATTGCTTTTCGACCG  
CTGGGGCGCTGTGCAAATGACGCAGAACCTTGAAAACCTCGGCTTCACGGTCGTGCCGTTTCG  
GTCAGGGCTTCAAAGGATATGTCCCCGCCGACAAAGGAATTGATGAAGCTGACCCTGGAGCA  
GAAAATTGCCACGGTGGGCATCCAGTCTTTCGCTGGATGATGGATAACATATACATCCGAA  
CCGACCCCGCAGGTAATATAAAAAGCCGATAAGGAAAAATCCACCGAAAAAATCGACGGTGC  
TGTCGCCACCATTATGGCGCTTGACCGTGCGATTCCGGTGC GGTAACGATAACCGGGGAAGCG  
TGATAACGACAGGGGATTATTGGTCTTGTGAGATTTCCATAACGGTTCGGCAAATCTGCAT  
AGTTGCAGGTGCTGTAGGATCAAAGTAATAACAGCTTCCGCTCTTGAAATACTTAGCTCCGG  
CAGATCTTGACAATTCCTTTTGTGTCTTTGTCTTTGGCTCAACAGGTAAGTATCTGAACGGAG  
CGAGTATTGTTTTAATCATGCATCCACAACCTGATCTGCGATGGTCATTAGTTAAATCGAAAT  
CGGAAGATTTGTTTCTGTGTAATAATCTTCTACATCTGAGTATGTGGCTTCAATAGCCGGTC  
TCCCTGCTTCGGATGCATCGATCATCGCGATGATGTTTCTATCGGACGATAATAAAAAGAAT  
GTAGCCTGCGCGTGTGATTTGAAACAAGGTCTTTCCCGCATTTTGGATTTTCGTCAAGGAAA  
TCTTGATAAGTTGCTTTTCATTTTTTCTCTCCTTTAAGTTTTATAGCATCCAATATTGGTTGCTT  
TGATTGTAAAGCATCCGAATTCAGTTGTCAATACTTATTTGTGATTTTCTTGGAGGTGATACC  
ATTTGAATATATTATCCGGAATTTCACTCCCGCGATAAGCCCCAAAATCGTATCGGCGGC

AGTTGGCCGTTTTTGTTCGGCGGTACGACTGCCGGAAAACCTGTCAACGAACATACTGCCAT  
GCAGATGACCGCCGTGTACTIONCTGCGTAAGGATATTATCCGAAACGATAGCGGGTCTTCCGC  
TTCATGTGTACCGCTACAACGATGCAGGCGGCAAGGAGAAAAACCTGCAACACCCGTTATA  
TAAACTGCTCCATGACGAGCCAAACCCTGAGATGACTTCATTTGCGTTCGGGAAACGCTGA  
TGAGTCATCTTTTATTATGGGGAAACGCTTACGCGCAAATTATCCGAAACGCCAGAGGTGAG  
GTAATCGCCCTTATCCGCTTATGCCAAATAAAATGACGGTTCGACCGCGATTCAAACGGCCC  
ACTTTTTTACTTGTATCAGCGCACTTCGGAGGATATAACCCTCGCTCGGGAAGGACAGCCAGG  
TCTACCTTTCTCCGGCCGATGTACTIONTGCACATTCCCGGTCTGGGCTTTGACGGTCTGGTTGGGT  
ATTCGCCCATTTGCGATGGCGAAAAATGCCGTGGGACTCGCCATTGCCACCGAGGAATATGG  
GGCGAAGTTCTTCGCCAACGGAGCCGCGCCGGCGGCGTGTGCTGGAGCATCCCGGTACTATTA  
AAGACCCGCAGAAGGTCAAGGAAAGCTGGAACCTCCGCCTACCAAGGCTCGACGAACGCACA  
CAGGGTGGCTGTGCTGGAAGAAGGCATGAAGTACCAAGCCATCGGCATCTCGCCGAACAG  
GCACAGTTTTTTGGAAACACGGAAAGTTTCAGATCAATGAAATTGCCCGTATTTTCAGGATACC  
TCCGCATATGCTCGCCGACCTCGAAAAATCTTCCTTCAGCAACATCGAGCAGCAGTCGCTGG  
AATTTGTGAAATACACACTCGACCCGTGGGTGGTGCCTGGGAGCAGTCCATGTGCCGCGCC  
CTGCTCATGGAAAGCGAAAAGCCCGCCGTGTTTCATCAAATTCATGTGGACGGGCTGCTTCG  
CGGCGATTATCAGAGCCGTATGAACGGTTACGCCACGGCAAGGCAGAATGGCTGGATGAGC  
GCCAACGACATCCGGGAGCTTGAAAACCTCGACCGTATTCCAGCGGAGCTTGGCGGCGATCT  
CTATCTTATCAACGGCGCGATGACCAAATTACAGGACGCGGGTGCCTTCGCAAATACGACA  
GGAACGGAGGAAACAACCGAATGAAGAAATTCTGGAACCTGGGCGCGGGACGAAGAATCCG  
GTGCCCGTACGCTCTACCTCGACGGCACGATTGCCGAGGAAAGCTGGTTTTGATGATGATGTC  
ACCCCGAAAGCATTCAAAGCTGATTTGAGTGCCGGAGAGGGTGACATTGTTATTTGGATCAA  
CTCTCCCGGCGGCGATTGTATCGCGGCGAGTCAGATCTACGCCATGCTCATGGATTACAAAG  
GCTCGGTACCGTCAAGATCGACGGCATTGCGGCTTCGGCGGCAAGCGTTATCGCTATGGCG  
GGAACGAAGGTGCTTATGGCTCCCACGGCGCTCATGATGGTGCATAACCCGCTGACCATCGC  
AATCGGCGACAGCGAAGAAATGCAGAAAGCCATCTCCATGCTCGACGAGGTCAAGGAGAGC  
ATCATCAACGCCTATGAAATCAAGACCGGGCAGTCCCAGCGAAACTCTCCCACTTCATGGA  
TGCCGAAACCTGGCTCAACGCCAATAAAGCTATAGAACTGGGTTTTGCAGACGGCGTTCTTG  
AGGATGAAAAGAAGCGTGTGCAGGCCGAGGATATCACCTACGTTTTAGCCGCCGAGCAGT  
CACGAACTCTCTCTTGAATAAGTTGTACCCCAAGAAACCGCCTGTGAAAACAGGCACACCCG  
TTGATGTCGCCAAAGCCACTCCTGCGGAGTGGCTTCAGAAGCGGCTCTCTTTAATTTCACT  
AAATTTATAGGAGGAAAAACACAATGAGTAAAATTCTTGAACCTGCGTGAGAAACGCACCAA  
GGCGTGGGAAGCGGCTAAGGCTTTCCTTGACACAAAGCGCGGCGCGGACGGTCTGGTCTCC  
GCCGAGGATACCGCTACCTACGACAAAATGGAAGCCGATGTCGTCGCACTCGGTAAGGAAA  
TCGACCGCCTGAAAAGCAGGAAGCACTCGACCGTGAGCTGTCCAAGCCGCTAACGCCCC  
GCTTACCGGAAAACCCGCTGTTCCCGGCATGGAGGTCAAGACGGGTACTGCTGCCGCTGAAT  
ACAAGAAGGCAATGCTGGACGCCCTGCGTCCAACCTCAAGAGAATCAGCAATGTCCTGCA  
GGAAGGCATCGACACGAACGGCGGTTATCTTGTCCCCGATGAGTATGATAGCCGCTGATTG  
ACGGTTTGACCGAGGAGAATATCTTTCGTAAGCTCGGCACTACCATCAAACGAGCGGCGA  
ACACAAAATCAACATTGCCGCCACGAAGCCCGCCGCCGATGGATTGAGGAGGGCGGTACG  
CTCACCTTCGGAGACGCGACCTTCGCACAGATTATTCTCGACGCGCACAAAGCTTCATGTGCG  
TGTGAAGGTCACCGAAGAAGTCTACGACAACGCTTTC AACCTCGAAA ACTATA TTTCTGA  
CGCAGTTTACCAAAGCTCTCGCCAACACAGAGGAGGATGCATTCCCTCAACGGCGACGGTAC  
GGGCAAGCCCCTCGGCATCTTCGACGCAACCGGCGGTGGGCAGGTTCGGCGTGACCACTTCC  
GGCAGTTCCATTACAGCCGACGAAGCAATCAACCTTGTGTACACACTGAAACGCCCTTACCG  
CAAGAACGCAGCGTTTATACCAATGACCAGACTCTTTCGGTCTGCGCAAGCTGAAGGACA  
ACAACAGCGCATATATCTGGCAGCCTTCTATCAGGCGGGCGAGCCGGACAGACTTCTCGGT

TATCCCGTTTACACGTCGGCATATGTTCCCGTCATTGCCGCCGGAGCGCCGGTTATGGCATTG  
GGAGACTACAGCTATTACAACATCGGCGACCGCGGTTCCCGTTCTTTTCGCGGAGCTCAAGGA  
ACTGTTCCGCCGGTCAAGGCATGGTTGGATTTCGTCGCCAAAGAGCGCGTGGACGGCAAACCTG  
GTATTGCCCGAAGCCGTACAGATTCTGAAAATCAAGGCTTAATGAAAGGACAGTGGCGGTA  
TGACGCTGCTTGAAAAAGTAAAGGCCAACCTCATTCTGGAAACACACGGCGGACGATGAACT  
CCTGCAGATGTACATCACCGCCGCGGTTAAATACGCCGAAAGCTATCAGCATCTCACAGAAA  
ACTATTACACTGAACATCAGATGCCGCCTACCACTGAGCAAGCCGTCATCATGCTGTCTGCC  
CACTTCTATGAATCCAGGGACGGCAGCACGGGCGGCTTTTTTGTGCTGACAACGTGCAGGCCGG  
GCAGCAGGTGTGGGACACGGTCAATCTGCTTCTTCGGCTCGACCGGGATTGGAAGGTGTGAG  
CATGAGTTTTGGTAAAATGAACACCTTCATCGACATCACAGCAAAAACAACCTGTGAAGGAC  
GCGGAAGGCTTTATGACGGAATCCGATACCGTTGTAGCTTCCGTCAGAGCGTACCGGGAGG  
GTCGGCACGGCACCGAAAAATGGGCTAACAGAGCCGCTTCTCGGAAGCCTCCGACCTTTTC  
TGTTTTCGTTGTATCCCGGGCGTTACTGTCACGACCGCAATGGTCGTGGTGAACGACGGCGA  
CCGCTTTGAAATTACCTCGGTCGAGGATGTGAAAGGTCGCGGGATGTACATTGAAGTGCTCG  
CCAAGGAGGTGAAGCCGAGTGGCTAAGGCTGTCATGAAAATGCCGGAAGACTTCCTTCTGA  
AGCTTTCCCGGCTCGGAGAAAAACGGATGAAATCATCCCAAAGGTACTGGAAGCAGGCCGG  
CGAAGTTGTGGAAGTAAAAGTGAATCCAACCTGCAAGCCGTTATCGGCAGCGGCACTAAG  
GAAGACAGCCGTTCTACAGGCGAGTTGGTTTCTACGTTGGGTGTTTCCTCGGCAAGACAGGA  
TAAGGACGGGAATTTCAATGTAAAAGTAGGTTTTCCGAACCTCGTTCTGACGGCAAAAGCA  
ACGCCATGATTGCGGGAGTACTGGAATACGGGAAAAGCGGTCAGCCGCCGAAGCCCTTCT  
TAAGCCCGCAAAAACAGCAAGCAAAAACGCCTGCGTTGACGCGATGATCGCGGCGTTTGAG  
AAGGAGGTCGAAAACATATGAGCCTGCTGGAAGAATAAACACCCTCCTCTCACCGCTTGTG  
CCCGTTGAGACAGGTGTGTTTTCAAATCCGCCCCGGACAGATATGTTGTGATTACGCCGCT  
GGCGGATACTTTTGAAGTGTATTCCGACGACAGTCCCCGGAACGAATCACAAGAGGCGCGG  
CTGTCCCTTTTTGATAAAGGGCAGCTACATATCTGTGAAAACCAAATCGTCCGCGCTCTGCT  
AAACGCGGAATTCACCATAACCGACCGCCGGTATGTGGGCCATGAGGACGATACCGGCTAT  
CACCCTATGCCATCGATGTGGCGAAAATTTACGAACTGGAGGAATAACAAATGGCGACAA  
TCGGACTTGATAGGCTGTTCTACTCAAAAATCACAGAAGCAACGGACGGCACCGAAACTTA  
CGGCACTCCCATTTTCGTTGCCAAGGCGATGAAAGCGGATCTATCAGTCGAGCTTGCGGAGG  
CGACGCTTTACGCGGACGACGGACCCGCCGAGGTGCTGAAGGAATTCAAGAGCGGCACTCT  
CTCACTGGGGATCGACGATATCGGCGTGACAGCCGCAAGACCTGACGGGCGCAAAACTT  
GACGACAATCACGTCGTGGTATCCGGCAGCGAGGACGGCGGCACTCCCGTCGCTGTAGGCTT  
CCGTGCAAAAAGTCAAACGGAAGTACCGCTATTTCTGGCTTTACAGGGTGAATTTGGTA  
TTCCGGCGACCAACCTCGCCACCAAGGGCGACAGCATCACCTTCTCCACTCCGACCATCGAG  
GGTACGGTGTCCGCCGCAACAACTGGACGGAAACGGCAAGCATCCGTGGAAAACCGAGG  
TCAACGAGGACGATACGGGTGTTCCGGCTTCTGTTATCACCGGCTGGTACTCGCAGGTCTAC  
GAGCCTGTGTTTACAGCGCAGGCTGGAGGTGAAGGTTAATGGCTGACGAAAGAAGCTCCCA  
AATCACCATCGGCGGCGCGGAGTATGAGATGCTCTTGACCACCAAGGCAACGAAGGAAATC  
GCGGGGCGCTACGGCGGGCTTTCCAATCTCGGCGAAAAGCTGATGAAAAGCGAGAATTTTCG  
AGATGGCTCTCGATGAAATCGTATGGCTCATTACGCTGCTCGCCAATCAGTCGGTACTGGTA  
CACAATCTGCAAAAATCCCGCGAAAAAGCGTGAGTTGCTCACAGAGGAGGCTGTTGAACTGC  
TTACCTCGCCCTTTGAACTTGCGGATTACAAAAACGCCATCATGGACGCAATGTATAAAGGT  
ACGAAGCGTCATGTGGAAAGTGAGGACGAACCCTCAAAAACGCGGAGGTCCGGTAAGCG  
ACGAAGAGTTGTTTGGCCGCTGATTTTTTATGGAACGACCCTGCTCAGCCGGGCGGAGTCC  
GAAGTGTGGCTGATGCCGATCGGACATCTGCTCGACCAGTGGGAGGTATACAAGCAGTTTA  
ACGGTTTGGCAAAGCCCAAGCGCGAGTATTACATCGACGAAATCATAACCAATGGCATCTG  
AGGAGGTGGTGAGATATGGCGGACAATTTCCGCTTGAAAATCCGTGTTGAAGGTGAAAAGG

AGTTTAAAAAGGCACTCTCCGACATCAATCAGTCGTTCAAGGTTCTCGGCAGTGAGATGAAG  
CTGGTCGAGTCCGAATTCGGCAAAAACGAAAACAGCGTCCAGTCCCTCACCTCCAAAAATG  
AGGTGCTGACCAAACAATCGACGCCAGAAAGATAAAATCGAAACGCTCCGTAAAGCGCT  
GGAAAACGCCTCCGACTCCTTCGGCGAGAATGACCGCCGCACCCAGCAGTGGGCGGTGCAG  
CTTAACAACGCGCAGGCGGAACTCAACGGCATGGAGCGCGAACTGAAGGACAACGAAAAG  
GCTCTGGACAATGTGGCTGACAATTTGACGATGCCGAGAAGCAAGCCGACCAATTCGGAG  
ACGAGCTTGAAAAACGGGCAAGGAAGCCGATTCTCCGGCGGCAAGTTTGAAAAGCTCGG  
TTCCGTAGTCAAGGGTATCGGAGCGGCTATGGGTGTGGCTTTCGCCGCTGTCGGCACCCCG  
CAATCAGCGCGGGCAAAGCTCTCGTGGATATGACCGTGGAAGCCGCCGACATACGCGGATGA  
AATGCTGACACAGTCCACCGTGACAGGTATGTCGGTTGAGAGTCTGCAGGCGTACAGTTATG  
CCGCCGATCTGGTGGATGTGTCGCTTGACACGCTGACCGGCTCTATGGCGAAGAACGTCAAG  
TCGATGTCGAGCGCGGCAGACGGTTCGCCAAAATATGCCGACGCGTACGCACGGCTTGGCG  
TATCGGTTACCGATGCCAACGGCAATCTCCGAGACAGTGAGGACGTTTACTGGGAGGTCATC  
GACGCACTTGGCGGAGTCTCCAACGAAACGGAGCGTGACGCGCTCGCCATGCAGTTGTTTCG  
GAAAATCGGCGCAGGACTTGAATCCGCTCATTGCCAAGGCAGCGAAGGCATTGCCGCGCT  
GACAGAAGAAGCAAAACGCATGGGCGCTGTTCTCAGTGAGGAGAGCATCGAAAACTCGGT  
GCCTTCGATGATTCCGTTACGCGGCTGAAGCAAGGCTCGGAAGCCGCCAAGCGCGTGATGG  
GTAATGTTCTTCTCCGCAGCTTCAGACGCTTGCGGATGAGGGAACCACACTGCTCGGCGAT  
TTCACATCCGGATTGGTGGACGCCGGGACGACTTCGGCAAAAATCAGCGAGGTTATTGGCA  
ACACGGTTCGGCGGGCTTGTGACATGATCATGGAACATTTGCCGAAAATAATTCAGGTCGGT  
ATGGACATCGTTATGGCTATCGTAAACGCAATCGTTGAAAATCTGCCGACCATCGTGGAGTG  
CGCGTCTCTATCGTCATGACGCTCTTGGAAGGGTGTGATTGACGCACTGCCCGCTATCACGG  
AGGGCGCGTTACAGTTAGTGCTGACACTGGTTCAAGGCATCATTGACAATCTGCCAGCTATT  
ATCGAAGCCGCTATTCAGATGATCGTGACTCTGGCCTTGGGCATTGCGGATGCTCTGCCGGA  
ACTGATTCCATCCATCGTCGAGGCAATCCTCCTGATTGTTTCAGGTGCTGCTCGACAATATGG  
ACAAAATCCTCGAAGCTGCCTTCGCCATTATAAAAGGATTGGCAGAGGGTTTGCTGAACGCA  
CTGCCGGAAGTATCGACGCGTACCCGAAAATCATAACGACCATTATTGATTTATCACGGA  
CAATCTGCCTGAAATCATTGAGATGGGCATCGAGCTCACCGTTCAGCTTGCGGTTCGGGTTGA  
TAAAAGCCATACCGCAGCTTGTGGCGAAACTGCCGGAATCATCGCCGCCATCGTGACCGG  
CCTTGGGAAAGCGGTTCGGCGCTGTGTTTGAAATCGGCAAGAACATCGTCACGGGGCTATGG  
GAAGGCATCAAGTCCCTCGGCTCCTGGATCAGCGAAAAGGTATCCGATTTCTTCTCCGGTAT  
TGTTGACGGCGCAAAAAGCCTGCTGGGTATCAACTCGCCGTCAAAGGTATTTGCCGGAATCG  
GTGAAAATATGGGCCTCGGTATCGGCGAGGGCTTACCAGACGCCATGAAGGACGTTGAAAA  
AGATATAACAGACGCTATCCCAACCGACTTTGACCTTGATATGAATACCGGCATCCATAAGG  
TGATGAACGACACCTCGCTCGACGTGAAGAAAACCGTGGAACATACGGGTATTATCCGGGT  
CGAGGGCGTTAATAACGAAGGCGAAATGACCTCCGTTGTGGATATCATCATCGACAGGCTC  
AGACAGGAGGTGCGCGTATGAGTTATCTGAAAAATACGGAGACAAGTGAAACCATTACGCG  
CTTTGTCAGCTTCCGAAAAACGCAGGAGGTCATCCGCACGGTGCAGACCGCCCTTGACGGGA  
CGGAGTATTTGACCCGCTTCGGTTCGCCGACCGTGCATTATGAGTTGACACTCTATGTTAATG  
AGACCGGAAAAGCCGCGCTGATGTCAGCCGAAGATAGCGTTCGGCTGCTTGAATGCTCAGT  
AAAGCAAGGCGTTTTACAGGGAGGATTGTTGAACTCGGCGATTTTGATTATCAGGCGGCGG  
GCTGGTATAAGGTCACAGCCACTTTGCGGCAGTAAGCGAGGTTGAGCGACCCATGAGAAGC  
ATACCGATAGCGCTGAAAGAAAACTCGAAACCGCTTCAAGGCGGAAAACACGAACAGCA  
TGGCAAAACTCCGTGTGGTAGCCACACAGACCTCCGTCAATTCGCTGCTCTCAGAGCCGATT  
CACGAAGATATCTCTCCCGCATTCGGCGATGTAGCCGTGCGCCAGACGGCCGGAGAATCCG  
ATTTATCTCTTGCCTATGCCATCTGTTTGGATGACGGTATCGCGAATGTGTATAAACGGAAGT  
TTCCTGCTGGTATGGAGTACCTGTGGGAATACCAGTGGACGCTTGGAGCGGCGACCGATGTG

GCGATTGAATTTAACGGCGTGTGGAAAATGAACGCCGAAAAGGAATGGTATTACCTTCAAA  
CCGAGGAATATCCCTATGTTTTTTATATACGGGATGGGAATCTGTATGTTTCAGGTCTGGCGTG  
ACAGCGATAATGCCTCTCTGCTTGCAACCGGCGTTTCCCAGATATCCGCTTGCAAGGGCTGG  
CAGTCCAGTGTCGAACAGGACCTCGACCAAGGCTTGATCATCGGCTACCTCAAAAGCGGCTC  
GGTGTATTACCGGGCGCTCTGCTGTCAGGAAAACGGAAGCTATGTCTGGGAAGCAGAGCAT  
GAAGTGACCGCGCTTGGTACGGGCAACACGACGCTGTCCGTTATCCGCACCAACGATTTCCG  
TATCCGATTCTGACGCAGAATAACGGTTCGAATGCTTCTGGCGCTGACACACCGAAACTATG  
CCGGGATGAGCGTCCGGCCGGATACAGTCCATATCAACGCTTCCAATGTGAAGATGTGGATT  
TCCGATATAACCGAACTGGACACGCTGAACACTGAATACGCTTCCGGGAATACCGCCTATCC  
CTATGTTCTGCTGGACGAGCCGGACACGGAAGAAATCTCCGTAACCTTGGTAGAGAAGCTG  
AACCGCGAGACAGGTTTCGTTTGTTACGGCTTCAAGGTCCATCTCACAAGCCTTTATACGG  
AAGTGTGACGCAGGGTTTTCCGGTCAAATGCGCCCTGTCCGTTTCCGGAGTAACCGTTACCT  
CTGCGGCCTATGACAGCGAGGAACAGGGCGCTTGTCCCTTATACGAACGCCGATATCCGCAGG  
ACGGTAGCCGTGACCATAACGATGCCGGAATACCGCTCACTCTGGTATTACAAGTTGGGTTT  
TCAAAGATGGTTTCTGCCCGCTCTAAGTGCTGTCGCCGCTGCTGAAACCGTAGACTTCCAAA  
CCTACGAAAACGAGACAGCGGGCATTTCGATAGTTTCAACAGGAGCATGGATTGACGAGGC  
TTTATTACCCAGTGTTCAGCCCGCGCATAACGGCTGTCATTACGGTTGTGGCTTCGTCTGT  
TAGCCTGCAGCCTGTTTCCACATTACCGATTTAGGAGGTTTTCAAATGAAGATACAAGAAC  
GAGCCGTTCTTACAACCGGTTTGACGTCAAGGTGTCGACGCCGCAAGCGGCAAGGTCAA  
GCAGACGGCGGTCCGCTTCAACGTCATTACAACTACTATTTAACAGCAGGCTGACGGCTT  
CTCCGCTTAGTAAAACGACAGACCTGTTTACAGATATATCGCGGTCGGCACCCGGAACGGGGAC  
ACCCGCCGTTACGGATACCGCCCTTTTACGCATCTGACACGCAAAGCAGTGACGACGCTGG  
AAACGGTTTATGAATATCCGACTTCGCATACGACAAAGCAGATCAAGCTGGAAGCGACGGA  
GTGCAACGGTAGTACAATCACAGAGGTGGCGCTCGAAGGTTATTACAGCGGCACCTTTTCTA  
CTACTTATTACATCATGTCCCATGCCATGCTGCAGGATTCCGAAGGAAACCAGATCGCGATC  
GCCAAAACCGATACGGACGTGGTGTATATAACGGCAACCTTCTACGCCACCTGCACCCCATC  
CGGCTTCGGCACAAACGGCATTATCCACGGCCGAGAGCAATTGTCTGTCCAATGGCTAC  
TCACGGGCAATACGGACGGGTATGTGCGTTTTTCCCGCTTCCAGTGGAGTACTCCTCGGAT  
ATGAACGTAAAATATCACGGTAGTAAAAGCTATTCCTTACGCGGCGGCACCCGCAATACCA  
CTACCTACCAGTACGACCTGCCTGTTACAACATTCTTGACAGCGAGTGCAACAACCGCATC  
GTCAAGCATCTCGGCGTCGCAGGGGTTCGGAGCGTTTACCTTCCCGAACCATGAGGTTTTTCC  
GCCCTATGCGGTGCACCATCTCGTTATCGGCGAGGGCGATGGGGTTACCACCGAGTTCAGTA  
TGAGGTGTCCGTTGATAACAATCCGGTACCGTCCGTATTTTTGTAAACGACACAGAAATGACT  
GAAGGCACGGATTATACGGTGGATTTGGAGAACAACCTGCGGCGACTGGTATGAAAATTACT  
ATACGGCGGGCTTAACCTGCAAAAGCGCCGGAGTATCCTTCCGGCGACCTTGCACAAAAAC  
GCCAAGCAGCAGCTATTCCTATCGAGACCCTCTTGCATGGTGGAACTGCTATGACACGACGG  
TATATCCATCCTCCTGCACGGTAAACGATGTAAGCCCCATTAATAAGACTTTGGGACTGCA  
AAGCCTTGTAATACGCTGAAAATTGATATTCTGACCGTACCGACCGCAAGGCTCGATACCCT  
TAAAATACAGCATTCAACAAATGATGCCGACTGGACGGATGTAACAGAGCTTTCAAGGACA  
GGCCAGGTCTGGAAGTTCACAGAGGTTTACGCGAGGTATTGGAGAGCCTTTTTAAGCGGCGA  
AGGCAATGCCACCGTTGTCGTAACATCGAGCGGCATGACAGGTTCCGCCGATAACCCTTTCCG  
TGCCTGTGGCCTCATCAGATACGGCGAGCATCGTGGCGGGGAAGATAAAAACCTGCCCTTGA  
AAACAATGTAAACATTTACGCTTTATATGACGCGTGGGTTTTCCGGTGCAGATGTTGTTTTAA  
CAGCAAAAGCGCCTATTGCGAATGTTTCAAGCTTGAATATCGCCCTGTCGAACGGGACTTGC  
GCGGGCTTGACCACCGTTTCCACTTCGACCAATACGACGACCGGCGTCGCCGCCGTAAAACA  
GCAGGAAAATATCTATGTGACCGGAACCATCGGGACAGCGGGAAACGCCACGGTTGTGGTT  
ACCGCCCGGGAATGGCGAACTCGCCGATACCGTTTTCCGTGCCGGTTTTCAAGCGGCGATTC



GGCGACGACTGTCGCGACAAAGGTAAACGCCGCGCTCGCACTCAATTCCGACATCACGAAC  
TTCTTCACAATCAGCCCGGATAACGGCAGATATGTCCGGCTGACCCGCGAAAACGGTGGCGG  
ACAATGACGCCACGCTCAACATCAGTATCGCCAACGGTACCTGCACTGGCTTAACCGCCATA  
CCGACATCTACCGTTGACGCCGAGGCAACGCGGGAACAAAACAGGCGGAGACCTTAACCG  
TATCGGGCAGTGTTAGCTACAGCTGGACTTACAGCTTATATTACCAGAGCTTCCCGACAAGG  
GACGGACAGAGCTTCGGTTC AACCTTCTTTTTGGGTAAGACCGTGCCGGGGTTGAAGTTCAC  
AACACCGCCTGCCGACGGTGCGGCGATTACAGCCAGCTTTGCGCTTGAATATCCGTTCAAGA  
CCGAGAACAATCTGTTGCGCTTACCTACTCGGTTTACAGCTGCAACGGGGGTGACGCCATGAC  
GCTGACATTTGAATATAACCTTGATACCGGAGCAGGTTTGTATCCGCAGGTGATCCACACCT  
CGGACAACCTGCTCCGTTTCATATACCTACCGCCGACGGCACCGTGCCGGGAAGCACAGCA  
GACCCGTTTCTCGGTTTGTACGATAATCTGACCTATACGGAAATCGGCAGGATATCACCCGA  
TGAAACGGTATCGTATCCAAGCATCAAAAAAGTGGCGCATTACGGCGCATATGGGTTCTGG  
AGCGCCGAGGGGCGACCATCGTTTTGTATGTATATGCTGCCGACCGACATTACAAATTTCTTT  
GTCGATGGGTGAGTTAAGTTTAGCATCGGCAGCGAGGTCTCGCAGTTGTCTTGTACCTTACTC  
AATATCAAAGGCGCACTGCTCAATCGCTACCGTGCTTTTGTGACGCCCGGCACCAAGATGGA  
ACTGCACTTTTCCCTCGGTAGCAGCGGCGAAATTACGCTTGGCATCTTCTATATCGACCGCGC  
TTCGGTTTCGTACCCGGACGAAAAGGTGTCGGTATCCGCCAGGAACGCAATCGGCAAGCTGC  
TAAAGGAACAGACCTTTAATGAGGACAACACCTTTGAAGAAACGACGCTTACAGCAGAACCT  
GCAGGAGATTCTTCGCCTCGCCGAGGTGGAGGATTTTTTTGTGCGGCGACAGCACAAGGCAT  
GGAAACTGCGCTTCGAACCGGATGTCACCATACTGGACGGCATCAAACGGGTGATCTCTCTG  
CTTGACGGCTGGAATGTCGATGAAACGGCAAACGGCGTTATCGGCGTGCCGGCCGCCACCG  
ACGCCGATTTGACCAGCCCGCCGTGTATACCTTCGAGCGCGACAAGACCTGCTGGAGCTAC  
AGCGTGGAATATGACGATTCGGAAGCGGTAAGCAAGTTTGTGTCACCTGTGCCGACCCGG  
AAAACACGGTTTATGCCACCGTCCCCAGAAGCAAGTGGTGGATTACGCCGTCCCATCGAACG  
ACCTACGTTACAACCGCCGACGGTGCGACGCTTACCGAGATAACGGCAATGGCCGAGGAGC  
TGGCACAGACCATAGCCATATCCGGCAGGCAGGAGAGCTTCGTCCGTATCTTACGCCCCAG  
CTCACCATCGGTGACGAAGTGCGCATTTGTCAACGGGGCAAAAACCGAAACCATCGGTACGG  
TCACGGATGTTACGCACAATTTCCGGCAGGGGTGGTTTCTATACGGCGTTCACCGTGGACAGT  
GGCGGACGGCAAGGCAAAGCGCGTCTTTCGGATTTAATCGGCAAAGCATCCGAAAAGTCCA  
ATCTGAACGGCGTGACTATTTATTAAGGGAGGAATAACAACATGAAAGAAATCTGGAATTG  
GATTCAACTCGCGCTGTCCGGCAGTCCGGTGGCGCAATCGGCTGGTTCTTCGGCGGTATGGACG  
GTTAATCTACGCGCTGCTCGTGTTCGTGGTCCGCCACTATATACCGGAGTTATGTGCGCGA  
TTGCGGACAAAAAGCTGTCAAGCGAGGTTGGCTTCAAGGGCATCTGCAAAAAGGTGCTAAT  
ATTCGTGATGGTCCGCATCGGACATATCATGGATACCTATCTCATCGGCAACGGAGAGGTAC  
TGCGGACAGCCGTCATCTTCTTTACTGCTCCAACGAGGGCGTGTCGATGCTCGAAAATGCC  
GGGCATCTCGGTATGCCATCCCAGCGAAACTCAAAGATGTACTGGAACAGCTTCACGACA  
GAACGGAGGATAAATAGATGAATTTGTATAAACTTATTCTGACTAACAACGCCTGTTACAAG  
GCGGGCAGAATCATCACACCAAAGGGCATCATGGTGCATTCTACTGGGGCGAACAACCCCA  
ACCTCAAGCGCTATGTCCGGCCCCGACGACGGTTTGCTGGGAAAAAACAGTACAGCAATCA  
CTGGAATCAGGACAAGCCGGACGGACGGCAGGTCTGCGTCCATGGCTTCATCGGCAAACTG  
GCTGACGGAACGATAGCTACGTACCAGACGCTGCCATGGAATCATCGCGGTTGGCACTGTG  
GCAGCGGCTCAAAAGGCTCCGGCAACGATACTCATATCGGCTTTGAAATCTGCGAGGACGG  
TCTGACCGATGCCTCGTATTTAATGCTGTTTACAAGGAAGCCGTGGAGCTTTGCGTGTATCT  
CTGCGATCTGTACAACCTTACCGAAAAGGATGTCATCTGTCAATTCGGAGGGATATAAGCAGG  
GCGTTGCCAGCAACCACGGCGATGTAATGCACTGGTTCCCGAAACACGGCAAGAGCATGGA  
TGCCTTCGTTGCCGAGGTCCGGAAAGCTGCTCGTTGCATCCGCTCCCGCTACCGAGCCTGCAC  
CGACCACACAAAAACGCTCTACCGTGTTCAAATCGGGACGTA CTCTGTCAAAGCGAATGCC

GACGCTATGCTCTCCAAGGTCAAGGCGGCGGGCTTACCCGACGCTTTCATTA AAAACTGAATA  
GTTCGCACGTTTTCGGTTGCCAACTGACCCCTCGCTGTCCTGTGGATGGTGAGGGGTTTTTCTT  
TTTCCCTCCGAACGGAGGTAACCCAATGACCAGTCCACAAAAACAACGAATCAAATACTTG  
CGCGGCAAGGGCGAAAGCTATGCCGCTGTCGCCGACGCGCTTGGCATTTCGGAGAATACCG  
TCAAGTCTTACTGCCACCGGAACAACCTTGGCACGGGATTCATCACTGAACAAATTCAGCCC  
ATAAACGATATCTGTGCCAACTGCGGGCGGGCCGCTGACACATATGACCCGGTGCAAAGAAAA  
AGCGGTTCTGCTCCGACAAATGCCGTATGGTGTGGTGGGCAAAGCACCCCGAAGCCGTGAA  
CCGAAAGGCAGTCTACTACTTTGTCTGTCCAACCTGCGGGCGTGGAATTCGCTGCCTACGGTA  
ATGCCAAACGCAAATACTGCTCCCGTGCCTGTTTTCGGACTTTCGAGGAGGGCTACCGATGAG  
TAAGGAGGAGGTAATTCTCCACTATAAAGCGTCAATGTCCGTGTTCAAGAAATGGCTTGACG  
ACGGTGTTCATCACCCCGGCTGATCTGCAGTCAATTAACACAATGCTCGTCAAGAAATACGGT  
TTATCATCGTGCAGCATATTCCTCGAAAATGACTTGCTATGTAAGGAAACCAGAGTGATATA  
TGGTGTGTGAAAGGAGGCCGTTATGGGCAGAAAGATAACCAAAATTGAACGGACGGCGGA  
GTTGCCGTCCAGACAGAGGGTTCGCAGCCTACGCCCGCGTTTTCTGCGGCAAGGACGAAATG  
CTACACTCCCTTGCCGCTCAGGTCAGCTTTTACAGCAACCTGATACAGAGCAATCCTGAGTG  
GGAGTACGTCGGCGTGTATGCAGATGAAGCGGAAACCGGTACAAAGGATTCAAGACCTGAA  
TTTCAGCGACTGATTGCGGATTGTCGGGCGGGGTGTATCGACCTCGTCCTCACAAAATCAAT  
CAGCCGTTTTGCAAGGAACACTATTACGCTGCTGGCAACCGTCCGAGAACTAAAAGACCTTG  
GCGTCCGTGTGTCTTTTGAGGAGCAGAACCTGCACTCGCTTTCGTGTGACGGGGAGTTAATG  
CTTACCATCCTCGCAAGCTACGCACAGGAAGAGAGCCGTTCCGGTCAGTGAAAACCAGAAAT  
GGCGAATACATAAAAACTATACCGAGGGAAAACCCCTCAAATAATATCCGCATTTACGGTTAT  
GCGTACAGTAAAGGCAAGCTGACCGTTATCCCCAGAGAAGCAGAGGTCGTGCGGATGATAT  
TCGCCGACTACATTCGGGAATGGGTAAAAACGCCATTATGAAAAAGTTGACGAGACTCGG  
CATACCCAAAAGTGCGGGCGGTCCGGTGGTTCGAAAGCACGGTGGGCAGTATCCTTACTAAC  
GAGAAGTTCATCGGCGATACGTGCCTGCAAAGGGTTTTCATAGCCGACCACATCACCAAAC  
ACTGGAAACCAAACAGCGGTGAACTGCCAAAATACTATGTCGAGGGTTCTCACGAGGCGAT  
AATTGACAGAGAGACTTTCGAGGCGGTTCCAGGCTGAAATGGCGCGGGCGGGCGGCGAAAGCA  
AATCACCCCGAAAAAGCACATTCAGTGAGTTTTTCGGGGCTAATCACCTGCGGACAGTGCGG  
CGCGAAGTTCGCAAGAAAATAAACGGCATCGGCACAAAGTACGCCAAGGCAACATGGGCT  
TGTGCGACCTTTACCTATCGTGGCAAAGACCAGTGCGGGGCGAAGCGGATACCCGAAGACA  
TCCTCAAAGCGAAATGCGCTGAGGCTCTGGGGTTTTACGAATATGACGCGGAGAAGCTCAA  
AGCTAAAGTTGCCGCCATCGCAGTCCAGATGACGGTGTTTTTGTTTTTACCTTTAAGGATGG  
TACGGGGCGGACACTA ACTTTGGGAGAACCCTCCAGACGCAATAGCTGGACGGACGAGATG  
AAAGCCGCCGCAAGGAAAAAAGCAAAGGAGGGACACGCCAATGGCAAATGTTAGGGTCAT  
ACCCGCCACCGCCCTATCGTATCGGCGCAAGTGACAAATGCTGCCTGCAAGCGACGGGTG  
GCGGCATACGCGAGGGTTTTCAACGGATAGCGAAGAGCAGTTGACCTCATATGAGGCGCAGG  
TTGACTACTACACCAAATTCATTAACAACCGCTCCGAATGGGAATTCATAACCGTGTATACG  
GATGAAGGCATCTCGGCGGTGAACACGAAAAAACGTGAGGGCTTTAAACAGATGGTTCGCCG  
ACGGGCTGGCGGGCAAGTTCGATTTGCTCGTACAAAGAGCGTCAGCCGCTTCGCCCGTAAT  
ACGGTCGACAGTCTACAACCGTCCGCAAACCTTAAGGAAAAAGGCGTCGAGGTCTGGTTTG  
AGAAAGAAAACATCTACACGCTGGACAGCAAGGGCGAGTTGCTTATTACAATAATGTCAAG  
TCTCGCACAGGAAGAGAGCCGCTCTATTCGGAGAATGTGACTTGGGGGCAACGCAAGCGT  
ATGGCTGACGGCAA AATTACGCTTCCATATAAACAATTCCTCGGCTACTGTAAGGGCGAGGA  
CGGCTTGCCGAAGATAGTGCCGAGGAAGCTGAGGTTGTTTCGGCTTATATTCAGGCTTTTTA  
TGGAGGGTAAGACCTACTCGGCAATCGCAAAGCACCTCGTCAAGTATGGTTTTTCCAACACCT  
GCCGGCAAGGAAACATGGCAGGCTTGCGTAGTGCAGTCCATACTTACCAACGAAAAATATA  
AAGGCCATGCCCTCATGCAAAGACATACTGCGCCAACTTCCTCACCAAGAAGATGGTTAA

GAACACGGGACAGGTTTCAGCAATATTATGTCGAGGACAGCCATCCCGCTATCGTCGACCCCG  
ACGAGTGGGAAGCTGTTCAGGCGGAGATTATGCGCCGAAAGAAGCTCGGCAGTATTGGTTCG  
ATGCGGTAGCCCCTTTTTCAGGCAAATCGTCTGCGGTGAGTGCGGGCGGCTGGTACGGCAAAA  
AGGTCTGGGGCAGCTACAAGTCCGATAAGACCTATCGTCGAGAGGTTTACCGATGTAACGA  
CAAATATAAAGGCGAGCATAAATGCGAAACACCTGCTGTAACGGAGGACGAGGTTAAAGAG  
CGTTTCCTCACAGCATTCAATACTCTGATGGAAAACCGCGACGGGCTGATTGAGGACTGCCG  
ACTGGCGCAATCAACACTCTGCGACACCACGGCGATTGACACGGAACTCGCCGAACACTACTG  
CGAGAGATTGAGGTGGTCGCCGAGCTTTCCCGAAAGGCTATCTTCGAAAACGCCCGAACCG  
CCCAGAGCCAGAACGACTTCAATGAGCGCAACAATGGTTACCTCGAACGCCATCGCAAAGC  
GATGGAGCAGATCGATATGCTGGAGGCGGCAAAAACAGGAACGACTCGCCAAGTCAAAAAC  
ACTCGAAATCTTCATCCGCGACATTGAGAGCCGCCACTCGTTATAACTGAGTTTAAACGAAG  
CCTTGTGGTTAGCGGTAATCGACAGGGTTGCAATCGCCACCGACGGCGCAATGACTTTCACA  
TTCCGCAACGTAGCGGAGGTCACGGTATAG

>KBDCA2-10

ATGGGTA AACACGCGCTCCTCTCGGCTTCCTCAAGTCAACCGATGGCTCAACTGTCCGCCGTC  
CGCTCGGCTCTGTGAGCAATACGAGGACAATGGCAGCGACTACGCCGCCGAGGGTACGGAT  
GCCACTCGCTTGGTGAGTACAAGCTAAAAACAGCGCTCAACATCAAAGCAAAGACCCGA  
CCACCAACCTGACCTACAACCTCCGAGGAGATGGAAGAATGTGCCGCCGGTTACGCCGCTTAC  
ATCCTCGAACTGCTGGAGACAGCAAAGCAGACCTGCACCGACCCCGTTGTACTTATCGAGCA  
GCGGCTCGACTTCTCCAAGTATGTGGAGGGCGGTTTCGGTACCGGCGACTGCGTGATAATCG  
CGGACGGGACGCTCCACATCGTGGACTATAAACACGGTCAAGGGCGTTCTGGTGGAAGCGAC  
CGACAATCCGCAGATGATGCTATATGCCTTGGGCGCTTTGGAGTTGTTTCGACGGCATCTACG  
ACATCGACAAGGTGTCGATGACCATCTATCAGCCCCGCCGAGACAATGTCAGCACCCACAC  
GGTTTTCAAGAAATCGATTTACCAATGGGCGGAAGAAGTCCTAATACCGACCGCCAAAATTG  
CCTATGCAGGCGGCGGGGAGTACAACCTGCGGCGAATGGTGCCGGTTCTGCAAGGCTAAGCA  
AGAGTGCCGAAAACGAGCCGAGCGGAACATGGAACCTCGCCAAGCTCGAATTCAAACGCCCG  
CCATTGCTGGAAGACGATGAGATCGAGTCAATCCTCGGAAAGATAGACGACCTCATCTCTTG  
GGCTTCCGATATCAAGGACTACGCCCTGCAGGCCGCCCTCGGTGGAAAACGGTGGTTCCGGT  
GGAAGGTGCTCGAGGGTAAGAGCAACCGCAAATATGTCAATGAAAATGCCGTGCCCCAGAC  
AGTTCAATCCGCAGGCTACGACCCTTACGAACACAAGGTGATGGGCATCACCGCAATGGAA  
AAAGCTCTCGGAAAACCCGGTTCGCCGATTTGCTCGGCGGTCTGGTCGAGAAGCCGCAAG  
GCAAACCGACGCTCGTGCCGGAGGGCGACAAACGTCCGGCAATCAATACTGCCAAAACGAA  
TTTTATGGAGGTAAATACCAATGGCTAATCAGACAATGAACCGCAAAAACCCGAATCCCAC  
CCCGAACCCGACCAAGGTCATCACAGGCGAATCCAGGCTCTCCTACGCAAACCTGTGGGAG  
CCGAAATCCATAAACGGCGGCACGCCGAAATACTCGGTCAGCATCATCATTCCAAAGAGCG  
ACGCACACACTGTCGCCAAGATTAAGGCGGCGATTGAAGCGGCATACCACGAGGGGCGAGAC  
CAAGCTGAAAGGCAACGGCAAGACTGTTCCACCCCTCGCTTCCCTCAAACCTCCGCTCCGCG  
ACGGTGACATCGACCGACCCGACGACGAAGCCTACGCCGACAGCTATTTCAATTAACGCCAA  
CAGCGGCACGGCGCCCGGTATCGTCGACCATGACTGTGAGACCATCTTCGAACGCTCCCAGA  
TTTACAGCGGCGTGTACGCAAGAGCCAGTGTAAACTTTTACGCTTTCAACTCGAACGGAAAC  
AAGGGCATCGCCTGCGGGCTGAACAACATCCAGAAACTGTGCGACGGCGATCCGCTCGGCG  
GCAAGCCCAGGGCCGAAGACGATTTTCGCGACCGAAGACGATGAAGACTTCCTCGGCTAACC  
ACATTACACAGGACTCCGGAAGGCGGCGGAAACTTGCCGCCTTCTTGCCTTATGGAGGGCT  
TATGAAAACACTGTCAATCGATATCGAAACCTTTTCCAGCACCGACCTGAACAAGTGCGGTG  
TGTATAAATATGCCGAGTCACCGGATTTTGAGATTCTGCTGTTTGGCTATTCCGTGGACGGAT  
GCGAGGTACAGGTCGTGGACTCCACGGCAGGCGAAACGCTTCCGTTCGAAGTCCTCGACGCT

CTAACCAATGATGATGTGCTGAAATGGGCGTTCAACGCCAATTTTGAGCGGGTATGCCTGTC  
GCGCTACTTATCTGATATGGGTATATCCCTTGACCCATTCGCCGATAGCCATTGCTCATCTCA  
ATACCTTGGAAGTCGAAATACCTAAACCCCAATCGTGGCGTTGCTCTATGGTGTGGTCGG  
CGTATATGGGCTTGCCTCTTTCGCTTGAAGGTGCGGGAGCTGTCTTGGGCTTGGAGAAACAG  
AAGCTGACCGAAGGCAAGGAACTAATCCGCTATTTCTGCAAGCCGTGCGCCGCAACCGCCG  
TCAACGGACAGCGAACACGCAACTTTCCTGACCACGCCCCGATAAGTGGGCGGGCCTTTAAG  
GCATACAACCATCGCGACGTGGAAGCGGAGATGTCAATACAGCAGCGGCTCGCAAACCTTTC  
CCGTGCCGGAGAGCGTCTGGGACGAATACGCCCTTGACCAAGAAATCAACGACCGTGGCGT  
GGCTCTGGATATGGTTCTGGTACGAAACGCTATCGCTGCCGACGCCCCTTCAAAGGCCGGAC  
TTACCCGTAGGATGAAAGAAATCACGGAATTGAGCAACCCGAATTCCGTGCAGCAGATGAA  
GCAATGGCTCTCGGAAAACGGCATGGAAACCGACACCCTCGGTAAAAAGGCGGTCACTGAA  
ATGTTAAAAACCGCGCCGGAGCGCCTCGGTGCGGGCTTTGTGCTCCGCCAGCAGTTGGCAA  
ATCCTCGGTCAAAAAATACCAGACGATGGAGAACGCCGTCTGCACCGACGAGCGGGCAAGA  
GGCATGTTCCAGTTTTATGGCGCCAACCGAACCGGCAGATGGGCCGGGCGGCTGATTCAGAT  
GCAAAACCTCCCGCAGAACCCTTGCCTGACCTAGAACAGGCACGGGCATTGGTGCGTAAAC  
GGCGACTTTGCCGCTTTGGAAATGCTCTACGATTCCGTGCCAGAAGTTTTGTCTGAGCTCATT  
CGCACGGCGTTCGTGCCGAAACCGGATCACAAATTTATCGTAGCGGACTTCTCGGCGATTGA  
AGCCCGCGTCATCGCCTGGTTTGCCGGGGAACGTTGGCGCAACGAGGTCTTTGCCACCCACG  
GCAAGATTTACGAAGCGTCCGCAAGCCAGATGTTCCACGTCCCGATCGAGGAAGTCACTAA  
AGGCTCGCCTTTGCGCCAAAAAGGCAAAATCGCAGAACTCGCCCTCGGTTATGGCGGCTCTG  
TCGGCGCGCTCAAAGCGATGGGCGCGTTGGAAATGGGCTTGCAAGAGGACGAGTTACAACC  
ACTCGTCACAGCGTGGCGGGCATCAAACCCAAACATAGTACGGCTCTGGTGGGACGTGGAC  
AAAGCGGCTATGACGGCGGTCAGGGACAGAACCGTTGCCAAAACACATGGCATCCGTTTCG  
GCGTTCAGAGCGGGATGCTTATTATCACCTGCCTTCGGGACGGCGGCTCGCCTATGTGAAG  
CCACGTATCGGCACAAACCAATTCCGTTTCGTATTGCGTGACCTATGAGGGTGTGCGGCGGTAC  
AAAAAAGTGGGAGCGGCTTGAAAGCTACGGGCCAAAATTCGTAGAGAACATCGTGCAGGCA  
ACAAGCCGCGACATTCTTTGTTTTGCGATGCAGGCGCAGCGGTGCTGCAATATTGTGATGCA  
CGTCCACGACGAAATGGTTCGTGCAAGCCGACCGCCGTATGTCAGCCAAGGTTTTATGCGAAC  
AGATGAGTTGCACCCCGCCCTGGGCGGAGGGGCTTCTGCTCCGTGCCGATGGGTACGATTGC  
CCATTTTATAAAAAAGATTAATTGCCCGGTTGCCAAACTGCCCTCGCTGTCTGTGGATGGT  
GAGGGGTTACAGCCTCTCGGAAAAATCTATTTTCAGGAGGTTTGGTATGAACGAATTACAA  
GTGTTCTCCTACGAGGGGAACGAAATTAGGACGGTGCGCCAGGGCGACGAAACACTCTGGG  
TGTTGAAAGATGTGTGCGATGTGCTTGGGCTGTGCGACACGAACAAGGTGGCGGAGCGTTTG  
GACGGCGATGAGCTGACCCGAATCAAATTCGTGTGAGGTGGTTCAGACCCGTGAAATGTATG  
CCGTGAGCGAAAGCGGTCTCTACAACGTCATCCTCCGCTCCGAAAAGCCCGAAGCTAAAAG  
GTTCAAACGCTGGGTACCCACGAAGTGCTTCCGACCATCCGCAAGCACGGTGTGTATGTCA  
CTCCCGCAAGCTGGAAGAGATCATGAACGACCCCGACGCTTGGATTAAGGTGCTGACGAC  
TCTTAAAGCGGAACGTACCGCCAAGGAAAAGCTTCAGCTGGAAGCTGCCAAGAACGAGCCG  
AAGGTCGTATTTGCCGACGCCGTGTCGGTGTCCGACGGAACCTATCCTCATCGGCGAACTGGC  
AAAAATCCTAAAAGGCAACGGCATCGAAATCGGGCAGAACCGCCTGTTGATAAACTGCGT  
CAGGATGGCTACCTCATCAAACGTCAAGGCACGGACTACAACGCCCCGACGCAGAGGGCGA  
TGGAATTGGGACTTTTCAAGGTTAAGGAACTGCCATTACGCACTCCGACGGTCACGTCACC  
ATCAGTAAAACCACAAAGGTCACGGGCAGAGGTCAGGAATATTTTCATCAATTTTTTCCCTGG  
GAAAGGGGTAACCGAAAATGACAACTGAAAAAAAGCAAGCCATAAAAACGGCTCTGAGGA  
AAGTCGGCAAGGCAGTCTGGTCCGGCGCTCCCTTGGGTGTTTCATGTGGATTGGGTTGACCTGC  
TTGTTCTCGCTCCTGCTTATTAGTGCGGATAAAAGCACGGAACGAACCAAAACAGCTTGGCGG  
ACTTGAAGCTGAGAACGCGAGGTATGAATCGGAAAACGTACGACTTGATGAGGAGGTCAAC

TGGCTTCGCTCCCTTGTTCGAAAGAATGGAATTTGAGGAGGTTGGCGATGGACAGGCGCAACC  
ATGAGGGATATCCCGACCTAACCGCTTATGATGCGCTCTCCAGTGTGGAACGGGATGAAAA  
AGCAGGAAAGCCATATCTACCGTTGTCTATATCGCTTCGCCGTTTTCGGGGCGATACGGAAC  
GGAACACGGAACGTGCGCGGGGCTATTGCAGGTTTTCGGTTCAGTAAGGGGTGCATTCCTCTT  
GCCCCGCATCTGCACTACCCGCAGTTTATGGACGACAGCGACAAGGCGCAGCGGGATCTTG  
GACTACGCTTCGCCCTTATCCTGCTTGGCAAATGCGATGAATTATGGGTTTTTCGGTGAGACTG  
TCAGCGACGGAATGAGGCGCGAGATTTCAAAGCAAAAAACGCGGTATGCCAATCAGATA  
TTTTAACGGCAGATGCGAGGAGGTTACGCAATGCGAGATCTGAAAATATCCTACGGCGACA  
GCCGCTGTTCGAAGCGGTGGGTCAACAAAAAGACTACATTTGAGGAATTGTGCGAGCGGTT  
CAAGCTGACCCGACGTACCACAGAGACGGTCACTGAATATCAAAAATTCACCAAAGACCGC  
CGCGATGCCGCAAAGGACGTTGGCGGCTACGTCCTCGGCCACCTCAAGAGCGGCAGGCGCA  
AGAAGGATACGGTAGAAAGCCGTTCCGGGATAACGCTTGATGCCGATCACGCTGGTAACGG  
CTTCATCGACACTGTAGAGATGCTGTTCCCTTCATAAGTGCGCGGTCTACTCCACCCACAGTCA  
TACGCCGGAATCCCCGCGGCTCCGCGTGGTCATCCCGCTCTCCCGTGACGTTACACCGGACG  
AATATGCAGCACTCTCCCGCCTGGTTGCCGACGAAATCGGTATGGACTTTTTTGACGATTCTA  
CCTACGAGCCGGAACGCCTGATGTACTGGCCGTCCACCCCGTCCGGCGGAGAATATGTATTT  
AAGGTTGTTGACGGCGACGAGCTCGACCCCGACGAATACCTTGCAAAGTTGTCCGACTGGCG  
AGACTGCTCGCTCTGGCCGACATCGAGTCGCCAGTCCGAGGTGATACAGCACAGCATCCGGC  
AGCAGCAAGACCTCTTGCCAAAGATGGCGTGGTTGGGACGTTCTGCCGGGCTTATGGCATA  
GAGGACGCAATCGCAACATTCTTACCCGACATCTACGAGCCTGCGGCGATGCCCGGACGCTA  
CGACTATATCCCGGCCGACAGTTCATCGGGTGTGGTTCTCTACGAAGGCAAATGGGCGTACT  
CCCACCACGCAACCGACCCCGCCTGTGGCAAGCTGCTCAATGCCTTTGACCTCGTCCGCATC  
CATAAATTC AACGACCTTGACGACAAGGTAAGCTTCAAGGCAATGAGCGGGTTTGCCCTGA  
AAGACGAAAGGGTCAACACCCTGATTGCCGAGGAGCGCATCACCGCCGCGGAGACGGAATT  
TGCCGAAGGCGACGACTGGATGTCACGGCTCCAAAGGGAAAAAGCGGTATTCTTTGCAAC  
ACGCTCGGAAACCTTCTCCTTATCCTAAACAACGATGACGCCATCGGCGGCATCCGCTACAA  
CAAATCGCCAATCAAATATACGGCGAGAACCTACCGTGGGAGCGACCTCACCCGTCTTGGC  
GCGACGCCGATACCGCCCAGTTGGTGGCGTATGTTGACAAACGTTACGGTACATTTTCGGCT  
CGCAACTATGAACTGGCGCTCACCAAAGTCGCAGACGACCGCGCCTACCATCCGATACGTG  
AGTATCTGAACAGCCTGCCAACCTGGGACAGGATTACCGAATGGACACCCTGCTCATTGAT  
TACCTTGGCGCGGAGGATACGCCCTACACCAGAGCTGTTACCAGAAAGACGCTCGTTGCGGC  
GGTTGCCCGAATCCTGAACCCCGGCGCGAAACACGATTCCATCCTTGTGCTGAACGGCAAAC  
AGGGCGTCGGGAAGTCCACGCTCTTTTCAAGGCTCGGCCGGCAATGGTACTCCGACAGCCTC  
TCCATATCGGATATGAAGGACAAGACCGCTCCGGAAAAGCTGCAGGGTACTGGATACTCG  
AGCTCGGGGAACCTCGCGGGCATCAAAAAGATGGACGTGGAGACGGTGAAGTCGTTATCAC  
CCGAACCGACGACAAGTACCGCCCCTCCTATGGCCGGGCGGTGGAAAGCCACCCGCGCCAA  
TGCGTCATCGTCGGTACGACCAACTCGGATGGCGGATTCTGCGCGACATCACGGGCAACCG  
CCGCTTCTGGCCTGTTTCGCGTTTCCGGCGAGGGCAAATACCGCGCCTGGGAACTCACGGATA  
TTGACCAGATTTGGGCGGAAGCCCTTGTTAAGTACACCGAGGGCGAGGAATTGTTCCCTCAA  
GGAGATATCGCGTTAGCGGCTTTTGCCGAACAGCGCGACGCTATGGAGAATGACGACCGCG  
AGGGTTTAGTGGCTGAGTACCTCGAAACCTACTCCCTGATAACTGGGATACGATGGACATC  
TACCGCAGGCTCGAATACATCCGCTCGACCGACGACCCACGAAGACGAAAGGCACGGTGC  
GGCGTTCTCAGGTCTGCGTGATGGAGATTTGGTGCAGTGCTTTGGAAAGTCCCGTGAGTCC  
ATCAAGAAAGCCGACTCCTACGAGATTGAGGGCATCCTTAACCGGATCGGCGGCTGGGCGA  
AGTACGAGGGCAACAAGACCGGCAAAAAGGCTGTCCCGATGTACGGCGTACAGCGTGTGTT  
CGTGAGGTCAGAATGATTACGGCGCGATTGCCATGATTGCCTGTGCGGGGCTTCGGCAACCG  
TTATCGGCAAAGTCGCAAGCCCCGAATAAACCAACATTCTTACATAGCAATTGCCATATTG

CCGATGTTCTCCCTACTAAATCGTATTTAAGTAGTAATAATGGCAATTGGCATATGCAATAC  
ACACGCGAGGGATTTATAGGCAGAATCGGCAAGTTGGGCAATGTGAAAAGCGGAGGTGCTT  
ATGCGAGAAAAAATATTGGAGCGCAAGCTCACGGAGGCTGTAAAGGCGATGGGAGGTATCG  
CGCCCAAGTTCGTAAGCCCCGGATTCGACGGAATGCCCGATCGCCTTGTGCTTCTCCCCGAC  
GGAAAGTGCCTTTTGTGGAAGTGAAGCGGCGTGGCGAGAAAATCGCGACCTTTGCAGGAAG  
CAAGGCATGGGATGTTACGGCGATTGGGATTCTGAAGTCTATGTCTTGGACGATTATCAGCAG  
ATCGGAGGGATGCTTCGTGAAATATCAACCGCATAACTATCAACAGTATGCCACGGCGTTCA  
TCGAAGCGAATCCATTTCTTGCCTTCTCCTCGACATGGGGCTTGGCAAACGGCGATTACG  
CTGACCGCCCTAAACGATCTGCTGTTTGACAGCTTCTGAAGCCATAAGGTTCTGGTCATCGC  
ACCTTTGCGGGTTCGCCCCGCAACACTTGGCCGGAGGAACTGAGAAAATGGGAACACTTCTCC  
GATCTGCTGTTTTCCGTGGCGGTCGGTACGGAAGCGGAGCGCAAGGCGGCACTTTGGAAAA  
GAGCCGATATTTATATCATCAACCGCGAGAACATAACAATGGTTGATTGAGGAAAGTGGTCTG  
ACCTTCGACTTCGATACAGTGGTGGTCGATGAGTTATCCAGTTTTAAGTCCCATCAGTCAA  
GCGGTTCCGGTCGCTGATGAAAGTCCGCCCGAAGGTGAAGCGTATCGTAGGGCTGACGGGA  
ACACCAAGCAGCAATGGCTTGATGGACTTGTGGGCGGAGTTCGGGCTTCTGGATATGGGTCA  
GCGGCTCGGACGGTTCATCGGGCAGTACCGCACCGACTACTTTGCCCCGATAAGCGCAACG  
GTCAAGTTCGTCTTCAGCTACAAGCCCCTGCCAGACGCCGAAAAGCGGATATACGCCAGAAT  
CGCCGACATCACTATCAGTATGAAGTCCACCGACCACCTGAAAATGCCGAAATGGTGACC  
GCCGAATACCCAGTGC GGATGACGGAGCCGGAACAGGAACGGTACGACGAAATGAAGCAG  
GATTTGGTATTGCACCTTACCGAAGGCGAAGTTACCGCCGCAACGCCGCAGCTTTGTCAA  
CAAACCTCTGCCAGATGGCGAACGGAGCAGTCTATGGCGACGACGGAGAAGTCCACCACATC  
CACGACCGCAAGTTGGAGGCACTGGAGGATTTAATCGAGGCCGCAACGGGAAGCCCGTTT  
TGGTCGCTTATTGGTTCAAGCACGATGTGGAGCGGATTGCCGCAAGGTTGAAAACGCGACAC  
ATCCCGTTTTTCCAAGATGGACTCGAGCGATAGTATCACCCGTTGGAATCGCGGTGAGTTGCC  
CGTCGCCCTCATCCACCCCGCTTCGGCGGGACACGGGTTGAACCTGCAGTCGGGCGGCAACA  
CGATTATATGGTTCGGGCAGACGTGGAGTCTGGAACCTTACCAGCAGACCAACGCAAGACT  
CTGGCGGCAGGGCCAGCAATCTGAAACCGTGGTTATCCACCACATCGTCGCAAAAAGGAACA  
ATTGATGAGCGTGTCTCTCCGCCCTCTCCGAAAAGACAGGTCGCAGACCGCCCTTATCGA  
CGCGGTGAAAGCAAATCTATGAAAATCTGAGACAACATAAAACGACAATCCGTGCCAATCCG  
AGTGAATTTTATTATTCGGAGGTACGACATGAGCACAACAGCAGTGAAAAGTATCTGTGCG  
AGGCGAGATATCTTGATATGCGAATTGACTCAAAAATCCAGCAGGTTGCCGCGCTTAACGAC  
CTGGCGACAAAATGCACCTCTACACTGACCGGGATGCCGAGAAATCCCAATCATGGCACGT  
CCACAATGGCGGATGCCGTTACGAAGATTGTGGACCTGCAGGCGGAGATTAACCGCGACAT  
TGATGAGCTGATCAATTTAAAGAAAGAAATCACAGATGTGCTCAAATCCGTTTTCAACCCGG  
AGTATCAGACCATCCTTGAGAAACGCTACTTATGCTTCTCTTGGGAACAGATTTCAAGT  
GACATGAATTACAGTATGCAGTACACGTTCCGCATGCATGACCGGGCTTTGACGGAAGTTGA  
TGCTTTTCTGAAAGTGGAGAGTCAAGTTGATTGAAGGAGAGTGCTTTCTTTTGATATCATTAT  
AATGCGGAAACAGAATACAGAGAGCCTTCGTGGGAGCAATCCTGCGAGGGCTTTTCTTATGC  
CCCGAAGGTGGTGAATCTCAATGCCCTACAAACCCAGGCGTCCCTGCGTATACCCCGGCTGC  
GGTCGGCTTGCCGAAAGCGGTGGGCAATACTGCGCCGAGCATCAGAAGGTCATGGACAATC  
GCTATTACCAGTACGAACGCGACCCGGCTTCCAACAAGCGCTACGGTAGAGCTTGGAAAGCG  
CATCCGCGACCGCTACATCAAAGCGCACCCGCTGTGCGAGGAGTGCCAAAAGCAAGGTAAT  
CTTACCCCGCCGAGGAGGTACACCACATCCTGCCGCTCTCACGCGGCGGTGGCAACGAAGC  
CAGCAACCTCATGGCTCTATGCAAGCCGTGCCACGCCGCATCACAGTCGAGATGGGTGACC  
GCTGGCACGACCGATGAGGTTTGTATCACATTTTGTATACAAACCAAAAATGTGTTTACGAAAA  
AAATGTAATAACGCAGTCCGCGACCCGGTGGGGGTATCAAATCTCCAAAACCTTTTTTAAGC  
GGACAGCGGCGTGGGGCTTCGTGTTGAAAACGCGGTTTCAAACGGTGGAATAGCCCCGGC

ACAAAAGGAGTGTGATGAAAATGGCGAAAGACGGCACCTGCAGAGGGCGGCGCTCGTGCTGG  
CGCGGGCGCGAAAAAGAAGCCGCTCGCCGATAAGATTACAGCCGGAAACCCCGGCGGCAG  
AAAAGTACCCTGATGGAGTTTTCCGACACAGCCGACCTTCAAGGTCAGGCGATGCCGGAG  
CCAAACAAAATGCTTGAAGCCGTACAAAAGGACGGCAAGACGCTCGTCGCAAGCGAAATCT  
ACAAATCCACATGGACGTGGCTGAACGAGCGCGGCTGTGCAGCGCTTGTATCTCCACAAGTT  
CTGGAACGCTATGCCATGAGCGTTGCCCGGTGGATTCAATGCGAGGAAGCGGTCACCGAGT  
ATGGCTTTCTGGCGAAGCACCCACCACCGGCAACGCGATACAAAGCCCGTATGTGGCGAT  
GAGCCAGAATTTTCATGACGCAGACCAACCGTCTATGGTATGAGATTTTCAAATTGTGAAAG  
ACAAGTGCACAGGAGAATACAGCGGAGCCAATCCGCAGGATGATGTGATGGAGCGGCTTTT  
GACTGCTCGGAAAGGAAAATAATATGACTACTTACAAAACAGCAGAAAGCGTCTGCGCTGG  
ACACCCGGATAAACTGTGCGACATCATTGCGGACAGCATCCTCGACGCCTGTCTGCGCAAGG  
ACAAGTCCCTCCCGCTCGCCTGCGAGGTTATGGCGACCAAGGGCAAATTATCGTTGCGGGC  
GAGATCACCTGCGACGGCAAAGTCGACATCCGCTGGGAGGTGCGTGAAGTCCCTCCGCAAGG  
TCGGCTACAATCCGTGGATGTTTACAGTTTTTCGTGTTTCGTTTCATAAACAGAGCAGGGACATC  
GACGCCGGGGTGACTACTGCCCTCGAAGCCCGAAACGGCAGTGAGGAACGCTATGTCTCTA  
TCGGTTCGGGTGACCAAGGCACCGTGTACGGCTATGCCACAAACGAAACCCGAGAGATGCT  
TCCACTCCCGCTGGTGCTGGCGCATCGCATTGTCAAGCGTGTGGATACCGTTCGCAAGGATA  
AAATTGTGAAAGGCATTTTCCCGGACGGCAAAGCGCAGGTTACGGTGGAAATATGAGGACGG  
CAAGCCCAAACGCATAAAAACAATTATCGTTTTCCGTACAGCATGACAAGAACAAAACGCAG  
GAGCAGCTTACTCGGACATCAAGCAGAATGTGCTGTGGCAGTGCTTCGAGGACTTCCCTT  
TGACGATGACACCGAAATCCTCATCAATCCCTCCGGCAGATTTGTGAGGGCGGACCCGCCG  
CTGACACAGGGCTTACGGGCAGAAAGATTATGGTGGATACTTATGGAGGGATTGCTCTTCAT  
GGCGGGCGGCGCATTACAGCGGCAAAGACCCCAAAAGGTCGACCGCAGCGGAGCTTACATGG  
CGCGGTACATCGCAAAAAACATCGTATGGAGCGACTTGGCTGAGAGATGCGAGGTCGCTCT  
TTCTTATGGCATCGGCAAGGCAGACCCCGTGGCGGTTAACATCGACGCTTTCGGCACGAGCG  
CCCTCACCAATGAAGAACTGCGTAAAATTGTGCTGTCCGTGTTCAACCTGCGCCCGGCGGCA  
ATCATTGAAAAACTGCGTTTTGCGCAATGCGATATACGAGGACACAGCGGTATACGGACATTT  
CAATTCCTGTCTCTTTCCGTGGGAGGATTACGATAGGTACAAAGAAATCAGAAAGGCGGGC  
GAGAAATATGCTGATAGAAAAGATTACAGACTGATCGGCTCATCCCCGCCACTATAACCCTC  
GCAAAGACCTTAAGCCGGGCGACCCGGAGTACGAAAAGCTGAAACGCTCGCTTGAGGAGTT  
TGGCTATGTAGAACCCGTTATATGGAACAAGATCACCTCTCATGTGTCGTCGGCGGCCACCAGC  
GTCTGAAGGTGCTGCTTGATATGGGCATCACCGAGGTCGAGTGCGTGGTGGTTCGAGATGGAC  
GCCGAAAAGGAAAAGGCGCTCAATGTCGCACTTAACAAAATCAGCGGTGACTGGGATAAAG  
ACAACTGGCTCTGCTTATCGCCGACCTGCAGGGCGCGGACTTCGATGTTTCGCTCACAGGC  
TTCGACCCCGGAGAGATTGACGACCTTTTCAAGGATAGCTTGAAAGACGGTATTAAGACG  
ATGAGTTTGTGATGTGGATGCGGAACTGCAAAGCCAGCCGTCACCAAGCCGGGCGATGTGTG  
GCTGATCGGACGGCATCGGCTTGTCTGTGGTGATTCCACAAAAGCCGACACCTTCACTGCTC  
TGATGGATGGGAAGCTTGCAAACCTCGTGGTGACCGACCCTCCGTACAACGTCAACTATGAA  
GGAACGGCGGGCAAATCAAAAACGATAATATGGAAAGCGGAGCGTTCTACGATTTTCTGC  
TGGCGGCGTTAACGAATACCGAAGCGGCGATGGCGCAGGACGCTTCCATTTATGTGTTCCAT  
GCCGACACCGAAGGGCTGAACTTCCGCAAAGCGTTCTCGGACGCGGGCTTTCAGCTTCCGG  
GTGCTGCATCTGGAAAAAGCCATCGCTGGTGCTGGGACGCTCGCCCTATCAGTGGCAGCACG  
AGCCTGTGCTGTTCCGGCTGGAAGAAAAAAGGCAAGCACAACTGGTACGCCGACCGCAAGCA  
GACCACCATCTGGGAATTTGAAAAGCCGAAGAAAAACGCCGACCATCCCACCATGAAGCCG  
ATTGCGTCTCTGGCATATCCATTATGAACAGCAGCCTCACAACTGCATCGTGCTTGACCC  
CTTCGGCGGCAGCGGCAGTACGCTCATCGCCTGTGAGCAGTCCGACAGAATTTGCTTACCA  
TAGAGCTTGACGAGAAATACTGCGACGTCATTGTAACCGGTACATTGAACAGGTTGGGAA

TGTA AATAGTGT TTTCCGTTATCCGCGACGGTGT CACGATGAAATATGCGGAGGTATTCTCCG  
ATGAGTAAATTAACACTTGGCTCCCTCTTCGATGGCTCCGGCGGCTTTCCGCTCGGCGGTCTG  
CTCTGCGGCATCAAACCGCTCTGGGCTTCGGAGATTGAGCCGTTCCCGATACGGGTAACGAC  
CAAGCGGATACCACAGATGAAACACTACGGCGACATCTCCAAGCTGAACGGTACAGATTTA  
CCACCGGTGGATATTATAACCTTCGGTTCGCCCTGTACCGATATGTCAGTTGCCGGGAAAAG  
AGCCGGTCTGGACGGAAGCCAATCCGTCTTTTTTATGAAGCAATACGAATTATGAAGGAAA  
TGAGGTGCAAGACCAATGGCAGATACCCAAGATACGCTGTCTGGGAAAACGTGCCCGGCGC  
ATTCAGTTCAAACCAAGGGGCGGATTTCAAGGCAGTCCTCGAAGCGGTTGTCAGCGTCACCG  
GGAAAAACGCCGAGGTGCCTGCGCCTGACAACGGGCGGTGGTCTTACGCCGACTGCTACAT  
GGGAGACGGATGGTCGCTGGCTTACAGAACTATCGACGCGCAATATTTCCGGAGTACCCAG  
CGCCGCCGCAGAATCTACCTTGTGCGGATTTTGCAGGCGAATGTGCCGGAGAAATACTATT  
TGAGCCGGAAGGCGTGTCAAGGAATTTTGCGCCGTGCGGAAGCCCGTGGCAAAGA ACTGCC  
GGAGATGCTGAGAACGGCTCTGGATCAACAGGCAGCGGCATAACCTGCCTGAACGACCAAG  
GCGGCGACCGTATGGATATAACCGAAGATACGACGGCTACGCTCCGCGCCGAAGCCCATCA  
CCCGCCCTGCGTCATGCAGTCGAGCGGGTTCTGCACAGAGCATTCCGGCGAAGAGCCGTGGTG  
TGGGGTTTGAGGAAGAACGCTCTCCACGCTCCGGGCGGTGTCGTGCCTGGTGTGCGCAATC  
GAAAACCATCCGACAGACGGCCGGTGTAAAGTTTCCGAGGATGGGATGGTGCAGACGCTCA  
CTTCCCGTATGGGAACCGGCGGCATGAATACACCGCTTGTCTGGACACGCCGAAAACGCTG  
AAAATTCGTTCCGGCTGTGAGGATGGCGGCAAAGGCGCGCTGATTCAAGACGATATGTCCG  
CAACCTCGGCTGTAACAATGACCAGACTGTTTTTGTTCCTACCGCTTACGGTATCTGTTCTG  
ATAAGAGCAACTCCATGCTGTGCGACAATCCGCACAGCGGTATATATGAAGCGGAAACCTC  
ACGTA CTCTTGATGCGAACGGTGGCAACCCCGGCTGCAATCAAGGCGGTATCGCTGTGGTTG  
CACTCCAAGGTTCAATGATTGGACGTGAGGATAAAAACGGTCCCAGGGCAGCGGTATTA  
TGAGGATATCAGTTTTTCACTCACGGCTGCCGACCGTCACGCGGTAGCATATTCGATGACGA  
CTGGCGGCTTTTTAGAGATACACAAGGAAAAAGCCGCCACTTTGATGGCACGGGATTTTAAA  
GACCCTCCGCTTGTTAACCAGCCGACTATATTGTCCGCACTCACACCTACCGAGTGCGC  
CCGGCTTCAAGTTTTCCAGACA ACTGGTGCCTGATCTCGGCACGGCGAATCCGAACGAGG  
AGGATATTACTTTCTGGGCGGAGGTATGGGAAACTCACCGCCGCATCATCGGCACAAGTGA  
AAAGCCCAAGAGCCGCAGGCAGGTTATCAAATGGCTGAACAACCCGCACTCCGACGCCGCC  
GAATATAAGATGTGGGGCAACGGGGTGGCACTCCCATGCGTTTTGTTTTGTTCTGTCCGGCAT  
TGTGTTATCTACACAAGAAACCGCTTAATTATCGGGACATTATTCTCCACATAAATAAGCTCT  
GAATTGCTTGATAAATCAGGCATTCAGAGTGATATATGTATGTACCGAAAAGAGAAAGGCG  
GTATAACAATGACAATCAACTACAATGTAACAGGCAGCGAGCGCAAACGGCTCGTGCAAG  
CAATCTCGGAAATCATGGAGTGCAGCCAAATATAAGGGCGCTCCGACCTTCGCTACGA  
GGTGGACTATTTACCATCGACAAAAACGGCGTCCTATCCTTCGATGACCGTGCCGACAGCA  
AGGAAATCGAAAAGCTCATCGAGGGTCTGGCGGAGCGGGGCTTTGAATTTGACGGGTACGA  
CAAGACTGTGCTTACCATTGAAATGCCCGCTTGTCTTCTCCGACACAGCACTTGAAAATCT  
CAGCCGGCTGGTGGAAAGCAAAGGCTCGCTCATAAAAAGGCACTGGGCGTTACCGACCTG  
TCTATCCTAAAGGGTGAGGAGACGGTCACTTCCCGTGGTTCCCGATGCATGCGACCCGGA  
CGCAGTAAAGGCTTATACCCATCTTGTCACTGCGCTCTGTGAGATGGCGAAAACGCAGAAAC  
GGGTCAGCGCGACCGACAAGCCTGTGGACAACGAGAAGTACGCTTTCCGCTGTTTTCTCCTC  
CGGCTCGGTTTCATCGGCTCGGAATATAAGGCGGAGCGAAAAATTCTGCTCTCAAAGCTGAC  
AGGCAGCTCAGCGTTCAAACAGAATAACTGCAAGGCGGTGGATGAAGATGAATAAGCTTCC  
CACCGCCTTCTTCGTTGAGTATCCATTTTGCATTGAGGACTTAATCCGCCCTTATTTATCGGA  
ATGGCTGAAACCATATATTGCAGAAAAGGAAATAAGGCTCAGTAAAATTGATTACGAAAAC  
TTTATAACCGACTTATGTGTTGACAGATGGTTTATAGAAAAATACACGCATCTTTGTAGCAT  
AGACGAGAACGGAGTTTGGCATTGCGTTTTGGTAAGGCAAAAAGGGAAATCCGAGGGCGTG



TTGGTTATGTCCGAAGGCAGAGTTTTTCCAAAATGGGCTGCGTATTTGCCAAGTGAGGAGGT  
AGCTGAATGAACATACATCCTGAAATACTCAAACAATTAAGAGATTGCTTTACGCCCGGAAC  
CCGTGTGGAGATTATTCGTATGGACGATGTTCAAGCACCGCCCGTAGGTACAAAAGGTACGG  
TCGTTCGGCGTGGACGACATGGGTTCCATCATGGTTAACTGGGACAACGGCAGTGGTTTTGAAT  
GTGGTATATGGTGAAGATTTCTGCCGAAAGTTGAGGACAGCGATGGACAGTAAAGTTAAG  
GAACAAATACTCGGCATTTCGAAAATTGGGTGAAACAAATATGTTTCGATGTGCCGAAGGTAC  
GGGAAATCGCCTTGCGGGAAGATTACTGCGAACTGGCGGTTTACCTCGTCGAAAACAAAGC  
CGCATATACGCGGTTTCATCCTAACAGGCGATGAGGAATAATAAAAAAGCATAACTGGAGAA  
CAGCGCCGGAACGGCTCTGTTTCTCGTACAGATGGATTTCGAGGGCTTGCCGACGGCAGGT  
CTGTTTTTATGCTCTGCGAAAGGAGGTGGCGGGTATACGAAAACCTTAAAAAATACAATCCCA  
CCCGATTCAAAGCTACGGATTCGGTTTATGACAAGGCCCGCCGCGATTACGCAGTTGCTTTT  
GTCGAAGCCCTCTCCATACAAAAGGAACATGGGCAGGAAAGCCCTTTGAACTGATCGACT  
GGCAGGAACAGATTATCCGCGATGTGTTTGGAACGCTGAAGCCAAACAGCTATCGGCAGTTT  
AATACCGCCTATGTGGAGATTCCAAAAAAGATGGGCAAATCCGAGCTTGCCGGCGGCGGTTCG  
CACTGCTGCTCACCTGCGGGGATAACGAAGCGCGCGCCGAGGTTTACGGCTGCGCCCGCGA  
CCGCAACCAGGCGTCCATTGTTTTCAATGTGGCGGCGGATATGGTTTCGGATGTGTCCGGCGC  
TGGCAAACGGGTTAAAAATCCTTGATTCCATGAAGCGGCTCATCTATCTGCCGACCGGGAGT  
ATTTATCAGGTGCTGTCGGCGGACGTCGGCAACAAGCACGGCTTCAACACCCACGGCGTGGT  
ATTTGACGAACTGCATACCCAGCCGAACCGAAAACCTCTATGACGTAATGACCAAAGGCAGC  
GGCGACGCGAGAATGCAGCCGCTGTATTTTCTTATCACCACCGCCGGAGACAATCAGCACAG  
CATCTGCTGGGAGGTTTCATCAAAGGCTCTCGACATCCTCAACGGCAGGAAGCATGATCCCA  
CCTTCTATCCCGTCATTTACGGCGCGGCGCAGGAGGATGACTGGACTGACCCCAAGGTGTGG  
AAAAAAGCGAATCCGTCGCTCGGCATCACGGTCGGCATGGATAAAGTCAAGGCGGCTTTTG  
AATCGGCACGGCAGAATCCAGCCGAGGAGAACAGCTTCCGTCAACTTCGCTTGAATCAGTG  
GGTCAAACAGGCGGTGCGTTGGATGCCGATGGACAAATGGGACGCCTGCGCTTTTGCGGTA  
GACCCGGAAGCCCTGCGAGGGCGGGTCTGCTACGGAGGTCTTGACCTTTCCTCCTCCACCGA  
TATTACGGCGTTCGTGCTGGTATTTCCCGCCGGAGGATGAGGACGACAAATACGTCGTGCTGC  
CGTTTTTCTGGATTCCGGAGGATAATGTGGATTTGCGTGTGCCAAGAGACCATGTGAATTAC  
GACATCTGGAAGAAGCAGGGATATCTTGAAACCACCGAGGGCAACGTCGTTTATTACGGAT  
TCATCGAAAGTTTCATCGAGGAACTCGGCACCAAGTACAACATCCGTGAGATTGCTTTTCGAC  
CGCTGGGGCGCTGTGCAAATGACGCAGAACCTTGAAAACCTCGGCTTACGGTTCGTGCCGTT  
CGGTCAGGGCTTCAAGGATATGTCCCCGCGACAAAGGAATTGATGAAGCTGACCTGGAG  
CAGAAAATTGCCACGGTGGGCATCCAGTCCTTCGCTGGATGATGGATAACATATACATCCG  
AACCGACCCCGCAGGTAATATAAAAGCCGATAAGGAAAAATCCACCGAAAAAATCGACGGT  
GCTGTCGCCACCATTATGGCGCTTGACCGTGCGATTCCGGTGGGTAACGATAACCGGGGAAG  
CGTGATAACGACAGGGGATTATTGGTCTTGTGAGATTTCCATAACGGTTCGGCAAATCTGC  
ATAGTTGCAGGTGCTGTAGGATCAAAGTAATAACAGCTTCCGCTCTTGAAATACTTAGCTCC  
GGCAGATCTTGACAATTCCTTTTGTGTCTTTGTCTTTGGCTCAACAGGTAAGTATCTGAACGG  
AGCGAGTATTGTTTTAATCATGCATCCCACAACCTGATCTGCGATGGTCATTAGTTAAATCGA  
AATCGGAAGATTTGTTTCTGTCGTAATAATCTTCTACATCTGAGTATGTGGCTTCAATAGCCG  
GTCTCCCTGCTTCGGATGCATCGATCATCGCGATGATGTTTCTATCGGACGATAATAAAAAG  
AATGTAGCCTGCGCGTGTGATTTGAAACAAGGTCTTTCCCGCATTGTTGGATTTTCGTCAAGG  
AAATCTTGATAAGTTGCTTTTCAATTTTTCTCTCCTTTAAGTTTTATAGCATCCAATATTGGTTG  
CTTTGATTGTAAAGCATCCGAATTCAGTTGTCAATACTTATTTGTGATTTTCTTGGAGGTGAT  
ACCATTTGAATATATTATCCGGACTATTTCACTCCCGCGATAAGCCCCAAAATCGTATCGGC  
GGCAGTTGGCCGTTTTTGTTCGGCGGTACGACTGCCGGAAAACCTGTCAACGAACATACTGC  
CATGCAGATGACCGCCGTGTACTCCTGCGTAAGGATATTATCCGAAACGATAGCGGGTCTTC

CGCTTCATGTGTACCGCTACAACGATGCAGGCGGCAAGGAGAAAAACCTGCAACACCCGTT  
ATATAAACTGCTCCATGACGAGCCAAACCCTGAGATGACTTCATTTGCGTTCCGGGAAACGC  
TGATGAGTCATCTTTTATTATGGGGCAACGCTTACGCGCAAATTATCCGAAACGCCAGAGGT  
GAGGTAATCGCCCTTTATCCGCTTATGCCAAATAAAATGACGGTCGACCGCGATTCAAACGG  
CCGACTTTTTTACTTGTATCAGCGCAGTTCGGAGGATATACCCTCGCTCGGGAAGGACAGCC  
AGGTCTACCTTCTCCGGCCGATGTACTGCACATTCCCCTGCTGGGCTTTGACGGTCTGGTTG  
GGTATTTCGCCATTGCGATGGCGAAAAATGCCGTGGGACTCGCCATTGCCACCGAGGAATAT  
GGGGCGAAGTTCTTCGCCAACGGAGCCGCGCCGGGCGGCGTGCTGGAGCATCCCCTGACTA  
TTAAAGACCCGCAGAAGGTCAAGGAAAGCTGGAACCTCCGCCTACCAAGGCTCGACGAACGC  
ACACAGGGTGGCTGTGCTGGAAGAAGGCATGAAGTACCAAGCCATCGGCATCTCGCCGAA  
CAGGCACAGTTTTTTGGAAACACGGAAGTTTCAGATCAATGAAATTGCCCGTATTTTCAGGAT  
ACCTCCGCATATGCTCGCCGACCTCGAAAAATCTTCCTTCAGCAACATCGAGCAGCAGTCGC  
TGGAATTTGTGAAATACACACTCGACCCGTGGGTGGTGCCTGGGAGCAGTCCATGTGCCGC  
GCCCTGCTCATGGAAAGCGAAAAGCCCGCCGTGTTTCATCAAATTCATGTGGACGGGCTGCT  
TCGCGGCGATTATCAGAGCCGTATGAACGGTTACGCCACGGCAAGGCAGAATGGCTGGATG  
AGCGCCAACGACATCCGGGAGCTTGAAAACCTCGACCGTATTCCAGCGGAGCTTGGCGGCG  
ATCTCTATCTTATCAACGGCGCGATGACCAAATTACAGGACGCGGGTTCGTTTCGAAATACG  
ACAGGAACGGAGGAAACAACCGAATGAAGAAATTCTGGAACCTGGCGCGGGACGAAGAAT  
CCGGTGGCCGTACGCTCTACCTCGACGGCACGATTGCCGAGGAAAGCTGGTTTGATGATGAT  
GTCACCCCGAAAGCATTCAAAGCTGATTTGACTGCCGGAGAGGGTGACATTGTTATTTGGAT  
CAACTCTCCCGGCGGTGATTGTATCGCGGCAAGTCAGATCTACGCCATGCTCATGGACTACA  
AAGGCTCGGTCACTGTCAAGATCGACGGTATTGCGGCTTCGGCGGCAAGCGTTATCGCTATG  
GCGGGAACGAAGGTGCTCATGGCACCCACGGCGCTCATGATGGTGCATAACCCGCTGACCA  
TCGCAATTGGCGACAGCGAAGAGATGCAGAAAGCCATCTCCATGCTCGACGAGGTCAAGGA  
AAGCATCATCAACGCCTATGAAATCAAGACCGGGCAGTCCCAGCGGAAACTCTCCCACTTCA  
TGGATGCCGAAACCTGGCTCAACGCCAATAAAGCTATAGAACTGGGTTTTGCAGACGGCGTT  
CTTGAGGATGAAAAGAAGCGTGTGCAGGCCGAGGATATCACCTACGCTTTCAGCCGCCGAG  
CAGTCACGAACTCTCTTGAATAAGTTGTACCCCAAGAAACCGCCTGTGAAAACAGGCACA  
CCGTTGATGTGCCAAAGCCACTCCTGCGGAGTGGCTTCAGAAGCGGCTCTCTTTAATTTTC  
ACACTAAATTTATAGGAGGAAAAACACAATGAGTAAAATTCTTGAACCTGCGTGAGAAACGC  
ACCAAGGCGTGGGAAGCGGCCAAGGCTTTCCTTGACACAAAGCGCGGCGGGACGGTCTGG  
TCTCCGCCGAGGATACCGCCACCTACGACAAAATGGAAGCCGATGTCTGTTGGCACTCGGTAA  
GGAAATCGACCGCCTGGAAAAGCAGGAAGCACTCGACCGTGAGCTGTCCAAGCCGCTTAAC  
GCCCTCTTACCGGCAAGCCCGCTGTTCCCGGCATGGAGGTCAAGACGGGAACGGCTGCCGC  
TGAATACAAAAGGCAATGCTGGACGCCCTGCGCTCCAACCTCAAGAGAATCAGCAATGTC  
CTGCAGGAAGGCATCGACACGAACGGCGGTTATCTTGTCCCCGATGAGTATGACAGCCGCCT  
GATTGACGGTTTGACCGAGGAGAATATCTTCCGTAAGCTCGGCACTACCATCAAAACGAGCG  
GCGAACACAAAATCAATATTGCCGCTACCAAGCCCGCCGCGCATGGATTGAGGAAGGCGG  
TACGCTCACCTTCGGAGATGCGACCTTCGCACAGATTATTCTCGACGCACACAAGCTTCATG  
TCGCTGTGAAAGTCACCGAAGAACTGCTCTACGACAACGCTTTC AACCTCGAAA ACTATATC  
CTGACGCAGTTTACCAAAGCTCTCGCCAATACAGAGGAGGATGCATTCTCAACGGCGACG  
GTACGGGCAAGCCCTCGGCATCTTCGACGCAACCGGCGGTGGGCAGGTTCGGCGTGACCAC  
TTCCGGCAGTTCATTACAGCCGACGAAGCAATCAACCTTGTGTACACACTGAAACGCCCTT  
ACCGCAAGAACGCAGCGTTTATACCAATGACCAGACTCTTTCGGTCTGCGCAAGCTGAAG  
GACAACAACAGCGCATATATCTGGCAGCCTTCTATCAGGCGGGCGAGCCGGACAGACTTCT  
CGGTTATCCCGTTTACACGTCGGCATATGTTCCCGTCAATTGCCGCCGGAGCGCCGGTTATGGC  
ATTCGGAGACTACAGCTATTACAACATCGGCGACCGCGGTTCCCGTCTTTTCGCGGAGCTCA

AGGAACTGTTCCGGTCAAGGCATGGTTGGATTTCGTCGCCAAAGAGCGCGTGGACGGCAA  
ACTGGTATTGCCCGAAGCCGTACAGATTCTGAAAATCAAGGCTTAATGAAAGGACAGTGGC  
GGTATGACGCTGCTTGAAAAAGTAAAGGCAAACCTCATTCTGGAACACACGGCGGACGATG  
AACTCCTGCAGATGTACATCACCGCCGCGTTAAATACGCCGAAAGCTATCAGCATCTCACA  
GAAAATATTACTGAACATCAGATGCCGCTACCACTGAGCAAGCCGTATCATGCTGTC  
GTCCCATTCTATGAATCCAGGGACGGCAGCACGGGCGGCTTTTTTGGCTGACAACGTGCAGG  
CCGGGCAGCAGGTGTGGGACACGGTCAATCTGCTTCTTCGGCTCGACCGGGATTGGAAGGTG  
TGAGCATGAGTTTTGGTAAAATGAACACCTTCATCGACATCACAGCAAAAACAACGTGAA  
GGACGCGGAAGGCTTTATGACGGAATCCGATACCGTTGTAGCTTCGGTCAGAGCGTACCGGG  
AGGGTCGGCACGGCACCGAAAAATGGGCTAACAGAGCCGCTTCTCGGAAGCCTCCGACCT  
TTTCTGTTTTCGTTGTATCCCGGGCGTACTGTCACGACCGCAATGGTCGTGGTGAACGACGG  
CGACCGCTTTGAAATTACCTCGGTCGAGGATGTGAAAGGTCGCGGGATGTACATTGAAGTGC  
TCGCCAAGGAGGTGAAGCCGAGTGGCTAAGGCTGTCATGAAAATGCCGGAAGACTTCCTTC  
TGAAGCTTTCCCGGCTCGGAGAAAAACGGATGAAATCATCCCAAAGGTACTGGAAGCAGG  
CGGCGAAGTTGTGGAAGTAAAAGTAAAATCCAACCTGCAAGCCGTTATCGGCAGCGGCACT  
AAGGAAGACAGCCGTTCTACAGGCGAGTTGGTTTCTACGTTGGGTGTTTCTCGGCAAGACA  
GGATAAGGACGGGAATTTCAATGTAAAAGTAGGTTTTCCGAACCTCGTTCTGACGGCAAAA  
GCAACGCCATGATTGCGGGAGTACTGGAATACGGGAAAAGCGGTCAGCCGCCGAAGCCCTT  
TCTTAAGCCCGCAAAAACAGCAAGCAAAAACGCCTGCGTTGACGCGATGATCGCGGCGTTT  
GAGAAGGAGGTCGAAAACATATGAGCCTGCTGGAAGAACTAAACACCCTCCTCTCACCCT  
TGTCCTCGTTGAGACAGGTGTGTTTTCAAAAATCCGCCCGGACAGATATGTTGTGATTACGC  
CGCTGGCGGATACTTTTGAAGTGTATTCCGACGACAGTCCCCGGAACGAATCACAAGAGGCG  
CGGCTGTCCCTTTTTGATAAGGGCAGCTACATATCTGTGAAAAACCAAATCGTCCGCGCTCT  
GCTAAACGCGGAATTCACCATAACCGACCGCCGGTATGTGGGCCATGAGGACGATAACGGC  
TATCACCCTATGCCATCGATGTGGCGAAAATTTACGAACTGGAGGAATAACAAATGGCGA  
CAATCGGACTTGATAGGCTGTTCTACTCAAAAATCACAGAAGCAACGGACGGCACCGAAAC  
TTACGGCACTCCCATTTGCTTGCCAAAGGCGATGAAAGCGGATCTATCAGTCGAGCTTGCGG  
AGGCGACGCTTACGCGGACGACGGACCCGCCGAGGTGCTGAAGGAATTCAGAGCGGCAC  
TCTCTACTGGGGATCGACGATATCGGCGTGACAGCCGCAGAAGACCTGACGGGCGCAAAA  
CTTGACGACAATCACGTCGTGGTATCCGGCAGCGAGGACGGCGGCACTCCCGTCGCTGTAGG  
CTTCCGTGCAAAAAGTCAAACGGAAAGTACCGCTATTTCTGGCTTACAGGGTGAAATTTG  
GTATTCCGGCGACCAACCTCGCCACCAAGGGCGACAGCATCACCTTCTCCACTCCGACCATC  
GAGGGTACGGTGTTCGCCGCAACAACTGGACGGAAACGGCAAGCATCCGTGGAAAACCG  
AGGTCAACGAGGACGATACGGGTGTTCCGGCTTCTGTTATCACCGGCTGGTACTCGCAGGTC  
TACGAGCCTGTGTTTACAGCGCAGGTCGGAGGTGAAGGCTAATGGCTGACGAAAGAAGCAC  
GAAAATCACCATCGGCGGCGGAGTATGAGATGCTCTTGACCACCAAGGCAACGAAGGAA  
ATCGCGGGGCGCTACGGCGGGCTTTCCAATCTCGGCGAAAAGCTGATGAAAAGCGAGAATT  
TCGAGATGGCTCTCGATGAAATCGTATGGCTCATTACGCTGCTCGCCAATCAGTCGGTACTG  
GTACACAATCTGCAAAAATCCCGCGAAAAGCGTGAGTTGCTCACAGAGGAGGCTGTTGAAC  
TGCTTACCTCGCCCTTTGAACTTGCGGATTACAAAACGCCATCATGGACGCAATGTATAAA  
GGTACGAAGCGTCATGTGGAAGTGAGGACGAACCCTCAAAAACGCGGAGGTCGGGTAA  
GCGACGAAGAGTTGTTTGGCCGGCTGATTTTTTATGGAACGACCCTGCTCAGCCGGGCGGAG  
TCCGAAGTGTGGCTGATGCCGATCGGACATCTGCTCGACCAGTGGGAGGTATACAAGCAGTT  
TAACGGTTTTGGCAAAGCCCAAGCGCGAGTATTACATCGACGAAATCATAACCAAATGGCATCT  
GAGGAGGTGGTGAAGATATGGCGGACAATTTCCGGCTGAAAATCGGTGTTGAAGGTGAAAAG  
GAGTTTAAAAGGCACTCTCCGACATCAATCAGTCGTTCAAGGTTCTCGGCAGTGAGATGAA  
GCTGGTCGAGTCCGAATTCGGCAAAAACGAAAACAGCGTCCAGTCCCTCACCTCAAAAAT

GAGGTGCTGACCAAACAAATCGACGCCAGAAAGATAAAAATCGAAACGCTCCGTAAAGCGC  
TGAAAAACGCCTCCGACTCCTTCGGCGAGAATGACCGCCGCACCCAGCAGTGGGCGGTGCA  
GCTTAACAACGCGCAGGCGGAACTCAACGGCATGGAGCGGAACTGAAGGACAACGAAAA  
GGCTCTGGACAATGTGGCTGACAATTTGACGATGCCGAGAAGCAAGCCGACCAATTCGGA  
GACGAGCTTGAAAAACGGGCAAGGAAGCCGATTCCTCCGGCGGCAAGTTTAAAAAGCTCG  
GTCCCGTAGTCAAGGGTATCGGAGCGGCTATGGGTGTGGCTTTCGCCGCTGTCCGGACCGCC  
GCAATCAGCGCGGGCAAAGCTCTCGTGGATATGACCGTGGAAGCCGCCGCATACGCGGATG  
AAATGCTGACACAGTCCACCGTGACAGGTATGTCGGTTGAGAGTCTGCAGGCGTACAGTTAT  
GCCGCCGATCTGGTGGATGTGTCGCTTGACACGCTGACCGGCTCTATGGCGAAGAACGTCAA  
GTCGATGTCGAGCGCGGCAGACGGTTCCGCAAAATATGCCGACGCGTACGCACGGCTTGGC  
GTATCGGTTACCGATGCCAACGGCAATCTCCGAGACAGTGAGGACGTTTACTGGGAGGTCAT  
CGACGCACTTGCGCGAGTCTCCAACGAAACGGAGCGTGACGCGCTCGCCATGCAGTTGTTTCG  
GAAAAATCGGCGCAGGACTTGAATCCGCTCATTGCCCAAGGCAGCGAAGGCATTGCCGCGCT  
GACAGAAGAAGCAAAACGCATGGGCGCTGTTCTCAGTGAGGAGAGCATCGAAAAACTCGGT  
GCCTTCGATGATTCCGTTACGCGGCTGAAGCAAGGCTCGGAAGCCGCCAAGCGCGTGATGG  
GTACTGTTCTTCTTCCGCAGCTTCAGACGCTTGCGGATGAGGGAACCACACTGCTCGGCGAT  
TTCACATCCGGATTGGTGGACGCCGGGACGACTTCGGCAAAATCAGCGAGGTTATTGGCA  
ACACGGTCCGCGGGCTTGTGACATGATCATGGAACATTTGCCGAAAATAATTCAGGTCCGT  
ATGGACATCGTCATGGCTATCGTAAACGCAATCGTTGAAAATCTGCCGACCATCGTGGAGTG  
CGGTCTCTATCGTCATGACGCTCTTGAAAGGGTTGATTGACGCACTGCCCGCTATCACGG  
AGGGCGCGTTACAGTTAGTGTGACACTGGTTCAAGGCATCATTGACAATCTGCCAGCTATT  
ATCGAAGCCGCTATTCAGATGATCGTGACTCTGGCCTTGGGCATTGCGGATGCTCTGCCGGA  
ACTGATTCCATCCATCGTCGAGGCAATCCTCCTGATTGTTTCAGGTGCTGCTCGACAATATGG  
ACAAAATCCTCGAAGCTGCCTTCGCCATTATAAAAGGATTGGCAGAGGGTTTGCTGAACGCA  
CTGCCGAACTGATCGACGCGCTACCCGAAATCATAACGACCATTATTGATTTTCATCACGGA  
CAATCTGCCTGAAATCATTGAGATGGGCATCGAGCTCACCGTTCAGCTAGCGGTCCGGTTGA  
TAAAAGCCATACCGCAGCTTGTGGCGAAACTGCCGAAATCATCGCCGCCATCGTGACCGG  
CCTTGGGAAAGCGGTCCGGCGCTGTGTTTGAATCGGCAAGAACATCGTCACGGGGCTATGG  
GAAGGCATCAAGTCCCTCGGCTCCTGGATCAGCGAAAAGGTATCCGATTTCTTCTCCGGTAT  
TGTTGACGGCGCAAAAAGCCTGCTGGGTATCAACTCGCCGTCAAAGGTATTTGCCGGAATCG  
GTGAAAATATGGGCCTCGGTATCGGCGAGGGCTTACCGACGCCATGAAGGACGTTGAAAA  
AGATATAACAGACGCTATCCCAACCGACTTTGACCTTGATATGAATACCGGCATCCATAAGG  
TGATGAACGACACCTCGCTCGACGTGAAGAAAACCGTGGAACATACGGGTATTATCCGGGT  
CGAGGGCGTTAATAACGAAGGCGAAATGACCTCCGTTGTGGATATCATCATCGACAGGCTC  
AGGCAGGAGGTGCGCGTATGAGTTATCTGAAAAATACGGAGGCAAGTGAATCATCACGCG  
CTTTGTCAGCTTCCGAAAAACGCAAGAGGTTATCCGAACGGTGCAGACCGCCCTTGACGGGA  
CGGAGTATTTGACCCGCTTCGGTTCGCCGACCGTGCATTATGAGTTGACACTCTATGTTAATG  
AGACCGGAAAAGCCGCGCTGATGTCAGCCGAAGATAGCGTTCGCTGCTTGAATGCTCAGT  
AAAGCAAGGCGTTTTACAGGGAGGATTGTTGAACTCGGCGATTTTGATTATCAGGCGGCGG  
GCTGGTATAAGGTCACAGCCACTCTTGCGGCAGTAAGCGAGGTGAGCGACCCATGAGAAGC  
ATACCGATAGCGCTGAAAGAAAACTCGAAACCGCTTCAAGGCGGAAAACACGAACAGCA  
TGGCAAAACTCCGTGTGGTAGCCACACAGACCTCCGTCAATTCGCTGCTCTCAGAGCCGATT  
CACGAAGATATCTCTCCCGCATTCGGCGATGTAGCCGTGCGCCAGACGGCCGGAGAATCCG  
ATTTATCTCTTGCCATGCCATCTGTTTGGATGACGGTATCGCGAATGTGTATAAACGGAAGT  
TTCCTGCTGGTATGGAGTACCTGTGGGAATACCAGTGGACGCTTGGAGCGGCGACCGATGTG  
GCGATTGAATTTAACGGCGTGTGGAAAATGAACGCCGAAAAGGAATGGTATTACCTTCAAA  
CCGAGGAATATCCCTATGTTTTTATATACGGGATGGGAATCTGTATGTTACAGGTCTGGCGTG

ACAGCGATAATGCCTCTCTGCTTGCAACCGGCGTTTCCCAGATATCCGCTTGCAAGGGCTGG  
CAGTCCAGTGTCGAACAGGACCTCGACCAAGGCTTGATCATCGGCTACCTCAAAGCGGCTC  
GGTGTATTACCGGGCGCTCTGCTGTGTCAGGAAAACGGAAGCTATGTCTGGGAAGCAGAGCAT  
GAAGTAACCGCGCTTGGTACGGGCAACACGACGCTGTCGGTTATCCGCACCAACGATTTCCG  
TATCGGATTCCTGACGCAGAATAACGGTTCGAATGCTTCTGGCGCTGACACACCGAAACTATG  
CCGGGATGAGCGTCCGGCCGAAACAGTCCATATCAACGCTTCCAATGTGAAGATGTGGATT  
TCCGATATAACCGAACTGGACACGCTGAACACTGAATACGCTTCCGAAATACTGCCTATCC  
CTATGTTCTGCTGGACGAGCCGGACACGGAAGAAATCTCCGTAACCTTGGTAGAGAAGCTG  
AACCGCGAGACAGGTTTCGTTTGTTACGGCTTCAAGGTCCATCTCACAAAGCCTTTATACGG  
AAGTGTGACGCAGGGTTTTCGGTGAAATGCGCCCTGTCCGTTTCCGGAGTAACCGTTACCT  
CTGCGGCCTATGACAGCGAGGAACAGGCGCTTGTCTTTATACGAGCGCCGATATCCGCAGG  
ACGGTAGCCGTGACCATAACGATGCCGGAATACCGCTCACTCTGGTATTACAAGTTGGGTTT  
TCAAAGATGGTTCCCTGCCCGCTCTAAGTGCTGTGCGCGCTGCTGAAACCGTAGACTTCCAAA  
CCTACGAAAACGAGACAGCGGGCATTTCGATAGTTTCAACAGGAGCATGGATTGACGAGGC  
TTTATTACCCAGTGTTCAGCCCGCGCATAACGGCTGTCATTACGGTTGTGGCTTCGTCTGT  
TAGCCTGCAGCCTGTTTCCACATTACCGATTTAGGAGGTTTTTCAAATGAAGATACAAGAAC  
GAGCCGTTCTTCATAACCGGTTTGACGTCAAGGTCGTGACGCGCAAGCGGCAAGGTCAAG  
CAGACGGCGGTTCGGCTTCAACGTCATTACAACTACTATTTAACAGCAGGCTGACGGCTTC  
TCCGCTTAGTAAAACGACAGACCTGTTTCAGATATATCGCGGTCGGCACCGGAACGGGGACA  
CCCGCCGTTACGGATACCGCCCTTTTACGCATCTGACACGCAAAGCAGTGACGACGCTGGA  
AACGGTTTATGAATATCCGACTTCGCATACGACAAAGCAGATCAAGCTGGAAGCGACGGAG  
TGCAACGGTAGTACAATCACAGAGGTGGCGCTCGAAGGTTATTACAGCGGCACCTTTTCTAC  
TACTTATTACATCATGTCCCATGCCATGCTGCAGGATTCCGAAGGAAACCAGATCGCGATCG  
CCAAAACCGATACGGACGTGGTGTATATAACGGCAACCTTCTACGCCACCTGCACCCCATCC  
GGCTTCGGCACAAACGGCATTATCCACGGCCGAGAGCAATTGTCTGTTCCAATGGCTACT  
CACGGGCAATACGGACGGGTATGTGCGTTTTTCCCGCTTTCAGTGGAGTACTCCTCGGATA  
TGAACGTAAAATATCACGGTAGTAAAAGCTATTCCTTCAGCGGCGGCACCGGCAATACCACT  
ACCTACCAGTACGACCTGCCTGTTACAACATTCCTTGACAGCGAGTGCAACAACCGCATCGT  
CAAGCATCTCGGCGTCGCAGGGGTTCGGAGCGTTTACCTTCCCGAACCATGAGGTTTTTCCGC  
CCTATGCGGTCGACCATCTCGTTATCGGCGAGGGCGATGGGGTTACCACCGAGTTCAGTATG  
AGGTGTCCGTTGATACAATCCGGTACCGTCCGTATTTTTGTAAACGACACAGAAATGACTGA  
AGGCACGGATTATACGGTGGATTTGGAGAACAACACTGCGGCGACTGGTATGAAAATTACTAT  
ACGGCGGGCTTAACCTGCAAAGCGCCGGAGTATCCTTCGGCGACCTTGCACAAAAACGC  
CAAGCAGCAGCTATTCCTATCGAGACCCTCTTGCATGGTGGAACTGCTATGACACGACGGTA  
TATCCATCCTCTGCACGGTAAACGATGTAAGCCCCATTAATAAGACTTTGGGACTGCAAA  
GCCTTGTAATACGCTGAAAATTGATATTCTGACCGTACCGACCGCAAGGCTCGATACCCTTA  
AAATACAGCATTCAACAAATGATGCCGACTGGACGGATGTAACAGAGCTTTCAAGGACAGG  
CCAGGTCTGGAAGTTCACAGAGGTTTCAGCGAGGTATTGGAGAGCCTTTTTAAGCGGCGAAG  
GCAATGCCACCGTTGTCGTAACATCGAGCGGCATGACAGGTTTCGCCGATAACCCTTTCCGTG  
CCTGTGGCCTCATCAGATACGGCGAGCATCGTGGCGGGTAAGATAAAAACTGCCCTTGAAA  
ACAATGTAAACATTTACGCTTTATATGACGCGTGGGTTTTCGGGTGCAGATGTTGTTTTAACA  
GCAAAGCGCCTATTGCGAATGTTTCAAGCTTGAATATCGCCCTGTGCAACGGGACTTGCAG  
GGGCTTGACCACCGTTTCCACTTCGACCAATACGACGACCGGCGTCGCCGCGTAAAACAGC  
AGGAAAATATCTATGTGACCGGAACCATCGGGACAGCGGGAAACGCCACGGTTGTGGTTAC  
CGCCGCGGAATGGCGAACTCGCCGATCACCGTTTCCGTGCCGTTTCAAGCGGCGATTCCGG  
CGACGACTGTGCGGACAAAGGTAAACGCCGCGCTCGCACTCAATTCCGACATCACGAACTTC  
TTCACAATCAGCCCGGATAACGGCAGATATGTCCGGCTGACCGCGAAAACGGTGGCGGACA

ATGACGCCACGCTCAACATCAGTATCGCCAACGGTACCTGCACTGGCTTAACCGCCATACCG  
ACATCTACCGTTGACGCCGCAGGCAACGCGGGAACAAAACAGGCGGAGACCTTAACCGTAT  
CGGGCAGTGTAGCTACAGCTGGACTTACAGCTTATATTACCAGAGCTTCCCGACAAGGGAC  
GGACAGAGCTTCGGTTCAACCTTCTTTTTGGGTAAAGACCGTGCCGGGGTTGAAGTTCACAAC  
ACCGCTGCCGACGGTGCGGCGATTACAGCCAGCTTTGCGCTTGAATATCCGTTCAAGACCG  
AGAACAATCTGTTGCGCTTCACCTACTCGGTTTCAGCTGCAACGGGGGTGACACCATGACGCT  
GACATTTGAATATAACCCTTGATAACCGGAGCAGGCTTGTATCCGCAGGTGATCCACACCTCGG  
ACAACCTGCTCGGTTTCATATACCTCACCGCCGACGGCACCGTGGCGGGAAGCACAGCAGA  
CCCGGTTCTCGGTTTGTACGATAATCTGACCTATACGGAAACCGGCAGGATTTACCCCGATG  
AAACGGTATCGTATCCAAGCATCAAAAAAGTGGCGCATTACGGCGCATATGGGTTCTGGAG  
CGCCGAGGGCGACCATCGTTTTGTATGTATATGCTGCCGACCGACATTACAAATTCTTTTGT  
CGATGGGTCAGTTAAGTTTAGCATCGGCAGCGAGGTCTCGCAGTTGTCTTGTACCTTACTCA  
ATATCAAAGGCGCACTGCTCAATCGCTACCGTGCTTTTGTGACGCCCGGCACCAAGATGGAA  
CTGCACTTTTCCCTCGGTAGCAGCGGCGAAATTACGCTTGGCATCTTCTATATCGACCGCGCT  
TCGTTTTCGTACCCGGACGAAAAGGTGTGCGGTATCCGCCAGGAACGCAATCGGCAAGCTGCT  
AAAGGAACAGACCTTTAATGAGGACAACACCTTTGAAGAAACGACGCTTCAGCAGAACCTG  
CAGGAGATTCTTCGCCTCGCCGAGGTGGAGGATTTTTTTGTGCGCGACAGCACAAAGGCATG  
GAAACTGCGCTTCGAACCGGATGTCACCATACTGGACGGCATCAAACGGGTGATCTCTCTGC  
TTGACGGCTGGAATGTCGATGAAACGGCAAACGGCGTTATCGGCGTGGCGGCCCGCCACCGA  
CGCCCGATTTGACCAGCCCGCGTGTATACCTTCGAGCGCGACAAGACCTGCTGGAGCTACA  
GCGTGGAATATGACGATTCGGAAGCGGTAAGCAAGGTTTGCCTCACCTGTGCCGACCCGGA  
AAACACGGTTTATGCCACCGTCCCCAGAAGCAAGTGGTGGATTCAGCCGTCCCATCGAACGA  
CCTACGTTACAACCGCCGACGGTGGCAGCTTACCGAGATAACGGCAATGGCCGAGGAGCT  
GGCACAGACCATAGCCATATCCGGCAGGCAGGAGAGCTTCGTGCGGTATCTTCACGCCCCAGC  
TCACCATCGGTGACGAAGTGCGCATTGTCAACGGGGCAAAAACCGAAACCATCGGTACGGT  
CACGGATGTTACGCACAATTTCCGGCAGGGGTGGTTTCTATACGGCGTTCACCGTGGACAGTG  
GCGGACGGCAAAGGCAAAGCGCGTCTTTCCGATTTAATCGGCAAAGCATCCGAAAAGTCCAA  
TCTGAACGGCGTGACTATTTATTAAGGGAGGAATAACAACATGAAAGAAATCTGGAATTGG  
ATTCAACTCGCGCTGTCGGCAGTCCGTGGCGCAATCGGCTGGTTCTTCGGCGGTATGGACGG  
TTTAATCTACGCGCTGCTCGTGTTCGTGGTCCCGACTATATCACCGGAGTTATGTGCGCGAT  
TGCGGACAAAAAGCTGTCAAGCGAGGTTGGCTTCAAGGGCATCTGCAAAAAGGTGCTAATA  
TTCGTGATGGTCGGCATCGGACATATCATGGATACCTATCTCATCGGCAACGGAGAGGTACT  
GCGGACAGCCGTCATCTTCTTTTACTGCTCCAACGAGGGCGTGTGATGCTCGAAAATGCCG  
GGCATCTCGGTATGCCCATCCAGCGAAACTCAAAGATGTACTGGAACAGCTTCACGACAG  
AACGGAGGATAAATAGATGAATTTGTATAAACTTATTCTGACTAACAACGCCTGTTACAAGG  
CGGGCAGAATCATCACACCAAAGGGCATCATGGTGCATTCTACTGGGGCGAACAACCCCAA  
CCTCAAGCGCTATGTGCGGCCCGACGACGGTTTGTGTTGGGAAAAAACCAGTACAGCAATCACT  
GGAATCAGGACAAGCCGGACGGACGGCAGGTCTGCGTCCATGGCTTCATCGGCAAACCTGGC  
TGACGGAACGATAGCTACGTACCAGACGCTGCCATGGAATCATCGCGGTTGGCACTGTGGC  
AGCGGCTCAAAGGCTCCGGCAACGATACTCATATCGGCTTTGAAATCTGCGAGGACGGTCT  
GACCGATGCCTCGTATTTAATGCTGTTTACAAGGAAGCCGTGGAGCTTTGCGTGTATCTCTG  
CGATCTGTACAACCTTACCGAAAAGGATGTCATCTGTCAATTCGGAGGGATATAAGCAGGGCG  
TTGCCAGCAACCACGGCGATGTAATGCACTGGTTCCCGAAACACGGCAAGAGCATGGATGC  
CTTCCGTGCCGAGGTGCGAAAGCTGCTCGTTGCATCCGCTCCCGTACCGAGCCTGCACCGA  
CCACACAAAAACGCTCTACCGTGTTCAAATCGGGACGTAATCTGTCAAAGCGAATGCCGAC  
GCTATGCTCTCAAAGGTCAAGGCGGCGGGCTTACCGACGCTTTCATTAATAACTGAATAGTT  
CGCACGTTTCGGTTGCCAACTGACCCCTCGCTGTCTGTGGATGGTGAGGGGTTTTTCTTTTT

CCCCTCCGAACGGAGGTAACCCAATGACCAGTCCACAAAAACAACGAATCAAATACTTGCG  
CGGCAAGGGCGAAAGCTATGCCGCTGTCGCCGACGCGCTTGGCATTTCGGAGAATACCGTC  
AAGTCTTACTGCCACCGGAACAACCTTGGCACGGGATTCATCACTGAACAAATTCAGCCCAT  
AAACGATATCTGTGCCAACTGCGGGCGGCCGCTGACACATATGACCGGTGCAAAGAAAAAG  
CGGTTCTGCTCCGACAAATGCCGTATGGTGTGGTGGGCAAAGCACCCCGAAGCCGTGAACC  
GAAAGGCAGTCTACTACTTTGTCTGTCCAACCTGCGGGCGTGAATTTCGCTGCCTACGGTAAT  
GCCAAACGCAAATACTGCTCCCGTGCCTGTTTCGGACTTTCGAGGAGGGCTACCGATGAGTA  
AGGAGGAGGTAATTCTCCACTATAAAGCGTCAATGTCCGTGTTCAAGAAATGGCTTGACGAC  
GGTGTCAACACCCCGGCTGATCTGCAGTCAATTAACACAATGCTCGTCAAGAAATACGGTTT  
ATCATCGTGCAGCATATTCCTCGAAAATGACTTGCTATGTAAGGAAACCAGAGTGATATATG  
GTGTTGTGAAAGGAGGCCGTTATGGGCAGAAAGATAACCAAAATTGAACGGACGGCGGAGT  
TGCCGTCCAGACAGAGGGTCGCAGCCTACGCCCGCTTTCCTGCGGCAAGGACGAAATGCT  
ACACTCCCTTGCCGCTCAGGTCAGCTTTTACAGCAACCTGATACAGAGCAATCCTGAGTGGG  
AGTACGTCGGCGTGTATGCAGATGAAGCGGAAACCGGTACAAAGGATTCAAGACCTGAATT  
TCAGCGACTGATTGCGGATTGTCGGGCGGGGTGTATCGACCTCGTCCTCACAAAATCAATCA  
GCCGTTTTGCAAGGAACACTATTACGCTGCTGGCAACCGTCCGAGAATAAAAGACCTTGGC  
GTCGGTGTGTCTTTTGAGGAGCAGAACCTGCACTCGCTTTCGTGTGACGGGGAGTTAATGCT  
TACCATCCTCGCAAGCTACGCACAGGAAGAGAGCCGTTCCGGTCAGTGAAAACCAGAAATGG  
CGAATACATAAAAACTATACCGAGGGAAAACCCTCAAATAATATCCGCATTTACGGTTATGC  
GTACAGTAAAGGCAAGCTGACCGTTATCCCCAGAGAAGCAGAGGTTCGTGCGGATGATATTC  
GCCGACTACATTTCCGGGAATGGGTAAAAACGCCATTATGAAAAAGTTGACGAGACTCGGCA  
TACCACAAAGTGCGGCGGTTCGGTGGTCGGAAAGCACGGTGGGCAGTATCCTTACTAACGA  
GAAGTTCATCGGCGATACGTGCCTGCAAAGGGTTTTCATAGCCGACCACATCACAAACACT  
GGAAACCAAACAGCGGTGAACTGCCAAAATACTATGTGAGGGTTCTCACGAGGGCGATAAT  
TGACAGAGAGACTTTCGAGGCGGTTTCAGGCTGAAATGGCGCGGGCGGGCGGAAAGCAAAT  
CACCCCGAAAAAGCACATTCAGTGAGTTTTCCGGGGCTAATCACCTGCGGACAGTGCGGGCGC  
GAAGTTCGCAAGAAAATAAACGGCATCGGCACAAAGTACGCCAAGGCAACATGGGCTTGT  
GCGACCTTTACCTATCGTGGCAAAGACCAGTGCGGGGCGAAGCGGATACCCGAAGACATCC  
TCAAAGCGAAATGCGCTGAGGCTCTGGGGTTTTACGAATATGACGCGGAGAAGCTCAAAGC  
TAAAGTTGCCGCCATCGCAGTCCAGATGACGGTGTTTTTGTTTTTACCTTTAAGGATGGTAC  
GGGGCGGACACTAACTTGGGAGAACCCTCCAGACGCAATAGCTGGACGGACGAGATGAAA  
GCCGCCGCAAGGAAAAAAGCAAAGGAGGGACACGCCAATGGCAAATGTTAGGGTCATACC  
CGCCACCGCCCCTATCGTATCGGCGCAAGTGACAAATGCTGCCTGCAAGCGACGGGTGGCG  
GCATACGCGAGGGTTTTCAACGGATAGCGAAGAGCAGTTGACCTCATATGAGGCGCAGGTTG  
ACTACTACACCAAATTCATTAACAACCGCTCCGAATGGGAATTCATAACCGTGTATACGGAT  
GAAGGCATCTCGGCGGTGAACACGAAAAACGTGAGGGCTTTAAACAGATGGTCGCCGACG  
GGCTGGCGGGCAAGTTCGATTTGCTCGTCACAAAGAGCGTCAGCCGCTTCGCCCGTAATACG  
GTCGACAGTCTACAACCGTCCGCAAACCTTAAGGAAAAAGGCGTCGAGGTCTGGTTTGAGA  
AAGAAAACATCTACACGCTGGACAGCAAGGGCGAGTTGCTTATTACAATAATGTCAAGTCTC  
GCACAGGAAGAGAGCCGCTCTATTTCCGAGAATGTGACTTGGGGGCAACGCAAGCGTATGG  
CTGACGGCAAATACGCTTCCATATAACAATTCCTCGGCTACTGTAAGGGCGAGGACGGC  
TTGCCGAAGATAGTGCCGGAGGAAGCTGAGGTTGTTCCGGCTTATATTCAGGCTTTTTATGGA  
GGTAAGACCTACTCGGCAATCGCAAAGCACCTCGTCAAGTATGGTTTTCCAACACCTGCCG  
GCAAGGAAACATGGCAGGCTTGCGTAGTGCAGTCCATACTTACCAACGAAAAATATAAAGG  
CCATGCCCTCATGCAAAGACATACTGCGCCAACTTCCTACCAAGAAGATGGTTAAGAACA  
CGGGACAGGTTACGCAATATTATGTGAGGACAGCCATCCCGCTATCGTCGACCCCGACGAG  
TGGGAAGCTGTTACAGGCGGAGATTATGCGCCGAAAGAAGCTCGGCAGTATTGGTCGATGCG

GTAGCCCCTTTTCAGGCAAATCGTCTGCGGTGAGTGCGGGCGGCTGGTACGGCAAAAAGGTC  
TGGGGCAGCTACAAGTCCGATAAGACCTATCGTCGAGAGGTTTACCGATGTAACGACAAAT  
ATAAAGGCGAGCATAAATGCGAAACACCTGCTGTAACGGAGGACGAGGTTAAAGAGCGTTT  
CCTCACAGCATTCAATACTCTGATGGAAAACCGCGACGGGCTGATTGAGGACTGCCGACTGG  
CGCAATCAACACTCTGCGACACCACGGCGATTGACACGGAACCTCGCCGAACACTGCGGAGA  
GATTGAGGTGGTGCAGGCTTTCCCGAAAGGCTATCTTCGAAAACGCCCGAACCGCCGAGA  
GCCAGAACGACTTCAATGAGCGCAACAATGGTTACCTCGAACGCCATCGCAAAGCGATGGA  
GCAGATCGATATGCTGGAGGCGGCAAAACAGGAACGACTCGCCAAGTCAAAAACACTCGAA  
ATCTTCATCCGCGACATTGAGAGCCGCCACTCGTTATAACTGAGTTTAAACGAAGCCTTGTG  
GTTAGCGGTAATCGACAGGGTTGCAATCGCCACCGACGGCGCAATGACTTTCACATTCGCA  
ACGTAGCGGAGGTCACGGTATAGCATTAACTGAAATTTACGGCTCGCTTTCGGGCGGGCTGT  
TTCTGTTCTTTCTATCTTTAATGACGGGATTCATCGTTAAAAGATACCCCATAAAAGGGGTG  
CAAATTTTAAACGATATGCTTTCTTTAACGTTTTGCCCTGTGACAACTCCGAAAACCTGCCAC  
GGTTCAAGTCAAGTGTGCTCCGAAAATGCCCTCTGAAACCATCAACTATTATACACAGCAA  
TGCGCCCAAAAAGCGAGAAAGCCTAGTATTGCTGGACTTTCGGGCAAAAACAAAACACCTA  
CCGACAAAATTTCTTTTATCAATAGATGGTATTTGATTTGGTGGAGCTGAGGTATCAATAGG  
TAGTACTCCCAAGGACTTCAGCTACACCTTCGCCCTCAGTATATAGCGCTAGGAAGGTTCAA  
TTCCAGTAAAGTGGGTCTTGGGGGACAGTTCCCGAACTTTTATTCGAGAAGAAGGGATTAAT  
TCCAGCAGTGCAACAGCTTCTTATCAATAAATAAAGTTTTGGTCCTATAGTTCTACAACCGA  
CAGCGCCGGCAGGCCAGGTGGCAAGGGTTCTTGTGCATCAGCGGCTTATGCTCGGCAATTCTA  
CGCAGGATTAGGGGCAGAGTGAAAGGTTTGGTGTCCGAATTTGTCATCCGACCTCACTTCTG  
AAATCGTTAAAAATTGGAATCCTTTTAAGCAAATCGTTAAGATACAGCTATTCATGCAAAA  
ACTCCTTTGTAGGTGATAAAGCGGATGTCTGCTTTATAATTCAACATCACGGTAGCCACACG  
GAATACCGATTGAGCCGTAGTTCCCCGGATTGCCGTAATCCCTACGTTGCCATAATTACCGT  
ATGAGCCAAAATCACGTTCTGATAAGGCGAGGTCTTGTGTGACAAGAGCCTATTACTTGCG  
ACAATTTCTCCCAAATACTTTCCGTGCATATCGATCAGAATTTTCTCGTTTGATAGGAAATGT  
CCGATATTCTGCCCGACGGAGCATGGAGATGTGCATTAATAAATTTGCGATATGCTTGCC  
CTTGCTATCATAAAGATACTCCATATTTTGTCTCCTTTCTGGTTCAAATTCAGTCAGTATCGG  
CGAAATCGCCTCGCGCCAGTTCACCTCTAACAACATATCCGCGTCTGTGATGTAGTTTTCG  
GGGACAATATTGAAGCGCCTCACATCAAGGGAGTAAATGTAATCGTTCTCGATGTGATAGGT  
TTCGTCAACATATTTCCGCGAGGACATCGTTCTTGTTCGCAACCGTTCCTTGCATCCCCGTT  
CTGCTCGGTATAGACACGGAGTATCAGCATTGATGTATGCCGAGGAATTGTTGCCGTACC  
TACTTAATAAGTTCTGAGCGGAACACTGTTCAAGCATCGCATTATAGTCAAAGTTCGGGATA  
AAGCTTTTAAATATAGGCTATACCTTGATCGATTTGCTCATCTGTCAATTTGTTGTTACCGTCC  
GCATCTAAAGTAGGTTCTGGCCGTCCGTGAATCAGGCTGGACAGGGTATTGTATGCATCCGA  
CTCTGTTTGCGGGTCTTTAAATTGATGCTCGATGAACTTCCGTAGGCAGCCTATTCTCGCAGC  
TATGTCGATATTACCATCCATAGCCAGTCTTTGAAAAGAACTACGGAGGACATCAGGTCAT  
CACCTCTATGAATTGGTGTGCATTGAAGTTGTCCGCCTACGTTTTCAAAGTAGTTAGCACAG  
ACCGATGTCGGGGTTTGCCTGCCAGATTCGCTCTGGATGTAGTCGATAACCGGCTCAAAGTC  
ATGCGTAAGCATCAAGACAGTTCTCTCATAGAGGCTGTTGCCGCGTCCTCCGGTTTTGAAAA  
GCCTGTTTATAATGGCATACTTCTTGTGCTGTGCGAACGAAGATATCGGGTTCGTCGAGGATT  
ATCAGCTTGGCATCGCTCCTTATGGCGTCAAACATAAAGAGTATCAAAGCGAAAGAGTGCCT  
CTCTCCCAACTCAGATGTTTGCCTGGCGATTGGACATCACCGGATTGCCATCCGGAAGAA  
TGAACTTTAAACATTGCCTTGGCGTTGTTTTACCGCTCACATAGACTTCGAATTTATACTTAA  
ACCCTGCAAGGTTGAGGAAGTCGTTGATATCTTGTCCCTGTCCCTGATTTTGTCTGAATAT  
ACTTGTGTACCTTCCGATTTACCCCTCAGTGCGTCAACCTTCGTCAAGAGGTCATCAATTT  
CAGCATTGACCGCACCCATCTCACTCTTGGTCAATTCCGCTGTAAAATAAGCGTCGCAGGCA



CGGAAGTCAACCTTCATATCAGAAAGACTTGTCTGCAGGTCGCCAATGTTTTCTCTGTCGAC  
AGAAGAGCCATTGAACGACAGAATCACTGTCAACCTGTCGTGCAGGTAGCTTGCCTCAGCAC  
GGAGTTTTGTTAGTTGGGTTTCAAGTACCTGTAAATCTTCTTTTACGCCGAACAGAGACATCA  
ACTCTGATGTCTTAGTTTCGTCCAGATATGGCTTGAGCGACTCAATCGCCTTTGAAATTGCCG  
CAGCTGCCTCAACACTCGTTTTGTCAAACTCTCTGCGAATACGCGGTTTATTGTTTTCGGTTT  
TTTTCTGTGTACCAGTAGAACAATAGGGGCATAGCTTTTTGTCCCCGAATTGTTTCGTAACCTT  
GCAACCTCCAAGCAGCCCCTTAGATACGGTATCGCCTTCCAAAAAGGGCTTCAAGTCGCTT  
AGTTCAGGATGTGGGTTAAAGTATGCACCTTTCCTTCAAGGATACCTTTAACCCCGCCCCTC  
TTGGCTATTTTGTACTATTGGTGAATTTGATTGTATCAATCAAATCCCCAATCTGGCTACGC  
AATTCAGCGATACCTTGTCTGTTTCGGTTATTGTTGTGCGGATTTTCGCCAAGGCATCATCAATG  
TTCTTTTTGGCGTCATCGTACTCTGGTGAACGAATAAAAACTTCGAAGGCATCTTTTATCAGA  
GAATCAGGCTGGTAGATATACTTGCCGACATAATTATCATCAAAGATTGCAATATCACCATC  
TGTCACGCCATCAATCGACGGTACAGTCATAGCACTTGCCTACCATATGGCGAAAGATCGA  
TCAGTTCATTGCCCTGCGACTTTAGATATATAGCCTGTGCAATCGTGCAGCTTTCCCGTACCGT  
TCCTGCCAAACAGGATATTCAGCTTATCATTACAAAGGCTTAACTCACCTCTCATGATGTTAT  
TGCAGTTTTTGATAATGATTATCGTATCAGACATCTCACATTTGCTCCTCATAATTATTTCTCA  
AAATCCTGTAAGAGTCCAGTACATTCAATAATCACTTGCCTTATTTTCATTAGTTGGGCCTCC  
TGAAAGTAGTTAACACCCGCTTATTGGACAAATTCAATTCTTTACTTGATACCTAAATAAATTT  
TTAAGGAATTGGACTGATTTTGCAGCTCCACACCTTGCCATGAATTGATTATTCATGGAAC  
ACTCATGTGGCGTAGTAGGTTTGTATCCTTTATATTTAGTAGTTCTGGATTACGTTTTAAACA  
AAGCCCAATCAACATTCTTTTCGAGAAATATTATGTCTCTATGATTATCAGAAGGCTTAGATA  
ATCTGTTTCCTTCTGTGAATTTGGCAATTAACATCATCCTCGGTTTTCTGGACGTTGTATTAG  
AGCTTTGTGTAAATTTTCAATTTGTGATCAGTAAAACATTCTCCTTTGAATCCCTGTTTTTTTC  
TGCCAACGTACCAAATCTTTTTCCGAATAATAAAAGCATAGCAGCCACAGGCGTCGGAAAG  
CCCAGTTTGCTTAGTTTCGATGTCTTACCAGAATAGTCTGGTGTCTCTCTGTTTTTCGGATAT  
GCACAACCTTATCTCTAGGGATTTCAAATGGTCCGTAAGGGTAAAAATACATAATTATTTCT  
TTTACCCGATTCAGCTGAAAATGACGTTTCATAGCTTTACACAGGAGTTCAGAAACCAACTT  
ACTGAGTTCCTCCACAATCCAAATCATTCCCTCGGTATCTAAGGCACAATATTTCTCAAGGTC  
TTGCCGAACCTTTTCGAATCTCTTCTTCAGAAAACATCCTCATCACTATGTTGAAGAATGCTAA  
GCTAGCATCATCCCCCTTGCCGATATCCATCCCATCGTAGCCTTTACCCGTCAACACCGGCAG  
TACTTTCTTGATCGATGCACTGCCTTGCTGCATGGGATGATAATAGCTGAAACCGCGGAATG  
GAGCATAGAGATCAATAACCTGTTTCGAGCGTTTTCTTCGATCCAGTCCGAGTATTCGGGGAAT  
GCTTCGCCAAGTTCCTTGAGCACGCCTTTTTTCGAAACTCATATTATATGTGATGATGTTGCC  
GTATCTCCAACGTGCTCTTTTCAGCTTTTCCAGAAACCCAGGCCGCGGGTACAGGTTCCATC  
AGCGAGATATCCATAATGATCTGGGTTTTTGCCAGGTTCTTTGACCACATGTAACGAGA  
GAAACGGGATACGCTGGTATGGCCGTGATCCGTCATAGATCGGGATAGCCGGACTGAACGT  
TTCGAAATCTAGGTAATACAATGGGTAGTTTAAATGACTCGATGAACTCTTGTATAGCATATC  
TGTCGATAGACGGTCCCCGCTGATCTCGCAAGACTGCTGGATTTTTTTGAGCGGCTGACAGC  
TTATAGTTTTTTCGGGATATCTTTTACGAACAAAATACCCTCATTAAACATATCGAAACACTTT  
TTACCACCGCGATAGAGGTCAAAAATATTATGTTCCGGTAGACATTCCCGGCACCAAGTAAC  
CGGACAATCGTAGGGATCACTACAATGAGGGCCAATTCCGATATCCGGGCAAGTTGGCGAA  
GCTATAACTTCCCACATTTTCTCAGATCGATCGATGATGCAGTCCGATACTTCGTTAGAAAAT  
TCGGTGACATCTTCTATCGTGAAAAGTTGGTGTAGGTCGATATCGCCGTTCTTTACGTATTCT  
CCTCTTACAACAGTAATTAATATCGATACTATTATGAAAACAGTCACTCATATAAAAAGCGCT  
ATTCTTTCTCATATTACTACCGTTATTATTATCGATATATTTTGTCTGTGATAATCCTTTAAC  
AAGATCTAGATGCCTTACCAAGATATATACAGGGATTTAGAAACCAGGATATTTACCACCTA  
CCCCTTTGCAAATAACCCCTCAATTTCCATTTTAGCCTAAGTAATTGGGTTTGGCACGTTTA

TCTGGACATTTTATCAAACAGTAATTACCGTTTGATAGTTTACAAAAGAGCCTTTTGTATGGT  
CATAATAAAGGGCAATTTGCAGCGCTAAGGGTGAGAATTGAATAAGCTTTAGAGGCTGGTT  
AGGTCTTAAAGAGATCTGAAACTGGAACCTTTGAGGGCCCTGGAAATGGCATAAATATTCTTG  
AGCGAAGGATTCTCTCGCCCCGTTTCGATACCACCTAAATATGTCCTGTGAACACCTGCCCG  
ATCAGCCAACCTCTCTTGCGGAGACTCCGGCTTTCTTCTTAAATCGCGTATGCGTTCACCGAA  
TCGTTGTTCAATAGTCTTTTCAGTCATCATATAAATTCTATTGACCAACATGATATGGTGAT  
GTAGACTATAGGTCTACAGACTATAAGTATCATTTATAAGTATTAGGGGAGTTTAAATGAAAA  
CACTCGCAAGATTAATCCAAGCTGTTTTACTGGTTATCATGTTGATTTTTGCATGGAATGCAG  
TCGCTTATTTTGTAACCTCGGCTGATTCAGATGATTCAGCCCCTGCTGTCAGATCTATACCGA  
CCAAGCAATCTATCCTCCAATCCCCCTTACACTCGATGGTCTTAAAACATCCGGGGCGGTAT  
GCGGCTGGGTATGTCTTTCTTGATTTTTATGATTCATACAGATTAGTCAATTACCTGAATAAG  
TATGATTATTCAGAACTCATCAACCTTATAATGCCGGCTCAAGATACGGCATGTACTTTTCG  
GATGTATTTTATCTGGTTCCCGGAGACAACCTGAAAATTGTTATCTATAGTGATGTACCTTA  
GGCCAAGATTTAAATTGTGAAATATCCAATAACACAAACAAAGGCCCGGTTGGCGTTACAC  
CTTCATATAATGTTGAGCGATATGAAAATGGCTATCGGGCAGTGCTTAGCTGCCATGCTACC  
GAATCCGGCACATATCAGTTCAGACTTTGGCATCAGGATAAGACGGCATCTAAAAGGTGCG  
CAATCGTATTCTATTTTCGAGTAGCAAATGTCCAGCTAAAAAGCCCCGCTCTGGATTTAATCATT  
TGAGCGGGCTTTTCCTTATCTATCAAGTACTGTCGAACAATTATCCGGGCAAGGATTTTTAG  
CCCCTTCATCGTCTGGGGGTCTATAGAATTTGCCTTGGCTGTCTTTTTCTGCCCATATATTCA  
TAATAACAAACCGCAAAATACATATATTAGTTGTAATTAGCATTGGTAAGAGCATATAATTA  
TGTATAACGAATCACAGGCAGACTTATCAGGCTGTCAAGGGGGTAAAATATGCCAAGAAA  
AAAGGCTCCGTCTATTAAGGAAACCCGCGAATGGCTTGACTTATATGAGAGCGGCTGGTCAG  
AAGCCATTTAGCCCAACGGAAAGGTAGGGATATCAGGACTATCCGCAAATATATAACCGA  
AGCTCAAGCGGAACGCCGTTTTGACCAAGCCGAACCTTGAGGTACTAAAAACAGCACTGACC  
AAGCACAAGAACAACCTTGCCACCTTAAACGAACCTTGATGCGGCTATTGCCCTGCCGGA  
GCCCGATACCCGGTTTTATTTGACCAAGATACTTATAAAATTGAATTTAATGCAGGGAAAG  
TAGTTGCCACGCAACCTGAGTCGTCCACAGATATTATCGTTAATTTAGAACTTGAAAACAGT  
CTTCTTTTACCCTTGTTGAACAGCATTAAACCATAACCTTACCTTCTTTTCATTA AAAAGGT  
GGAAAGCAGCATGCGAGA ACTATATAAATAGGTGTATCTTCTTCCGAAAAGAATTAGTAGA  
AGGTATGGATAGAATGGGGAGAGAAGTAGGGATAGAAGTATGCGCAGAAGCAAGGGATGA  
GAAGGGTATTTTGCTTGATTTTATATGTAAAAACAGCTTTAAATTCATACTTCTAAATGATCG  
CACAATACTTGAAAAAGCAGTTGAAAGGTTACAAATTAATAAGAACCGGGGGGAAATAATA  
ATAAAACCGGGTACCACTTTATTAAGCTGCCCAGGCGCTGAAGAGGCATGTCTGGAAGCAA  
TAACCAAATTATTAAGCATCGATAATTTGAAAAAATTCACATACATACGGGAAGCCTATAAA  
CAACTTGGAATGGAAACACAAACCCTTAAGAGAGATATTCAAACTCTGATTTTAACCAATTT  
TCTGCCAGGGGAATGCGATGTTTGCCGTCGCTTAAAAGGCCAAAGGAGCGGGAAATGAAAG  
TCGCACTTTACGCCAGGGTATCCAGCGAAGCTCAGGACGTAGAATTATCCATTGCCGCCAG  
TTAAGGGCACTTAGGGATTATGCCGGA AAAAATAACTATCAGATTACTTATGAATTTATAGA  
TGAGGCTGAAAGCGGGCGGACTGCCGCCAGACCTGAATTTAAACGGATGATAGCCATGTCC  
AAGTCATCCATAACCACCTTTCGAAGCTATATTAGTCTGGAAACTTAATCGCTTTGCCCGTAAC  
CGGGCTGACTCTATTACCTATAAACTACTGCTTCAGAAAAAGGGCATTAAAGTCATCTCCAT  
AAACGAACCCCTTGACGATTCACCCACCGCAAGCTGATGGAAGGAATAATAGAGTCTCTG  
GACGAATTTTATTAGCCAACCTTAGGGCAGGATATAAAGCGGGGAATGAAAGAAAATGCC  
TCAGGGGATTTTATAACGGAAGCCAGCCGCTTTAGGATATGAACTTGTA AAAAGTGAAGGAT  
GGCCCAAAGCAACGGAATAAACTTGCCCCGAAGCGGATACCTCTCCGGGAGTTAAAACCG  
TAAGATACATATTTGCTCTGGCGGATAAAGGCAAGGGCTGTAAAGAAATAGCCAATATTCTC  
AACCGGAAGAATATATAACTAAGGCAGGTAAACCCTGGGGCAGGACGACGGTTCATAAGA

TACTCTGCAATGAAGCCTATACAGGCACTCTGGTATGGGGAGCCAGACCCAGCCAAGGTCTG  
GCTAAAAATGAAGAGGCAGTGCGGTTAGAAAATGCCTGGCCGGGTATTATAGACAAGGAAA  
CTTTCCAGCGTATCCAGCAGAGCATGGTCTCCCGCCAGCCTAAAAATACCCACCCCCGGACA  
GTACCCAGCCAGTACCTGTTAAGCGGAATGGCTTTTTGCTCCTGTGGTGCGGCTCTGACCGG  
GCACAGTGCCAAATCAGGCCAGTATGCGTACTATCAGTGTAACCGGAAGTTTAAACAGGGA  
AACGGGGTCTGTAAGTCCAGGCAATACCTAAAACAAAATTGGAATCAGCTGTTATTAAGC  
AAATAAAGTCCAAGGTATTAACCGAAGAAAATCTGGAGGAACTAGTAAAACAGGTCAATGA  
GGAACCTGAATCAACTTCCAGCCATCATAAGGAAAAGCTGGCCGTTTTGGATGCCGAAGTGG  
ATGATATCAGACAGAGGTTAAACCGCCTGTATGAGGCTATTGAAAGCGGCAAGTTAAATTAT  
GACGATCTGGCGCCCCGGATAAGAGAGCTTAGGGAACGGCAGTCTAAACTTGAAAAGTCCA  
GGGTATTAGCTGAAGCTGAGATGGTAGCTGATAGTGACGACAATTTTAATCTTGGGATGGTT  
AAAGCCTATGCAAATGACCTTAAACAGCTGCTTAAACGAATCGGAGATAACCGACTGCAAGA  
CTTTCTTAAAGACTTTTGTTAAGAAGATTGAAACAGATAGCCGTAATGTGAGCTTGAAATAT  
ACCCTGCCGCTACCGGGAACATAACAGAAGAAGGGAAGTTCTACCTATTGATACCTTTGGTGG  
AGCTGAGG

>KBDCA3-11

ATGAGCAGTCACGCCCTTTTATCCGCTTCCTCTTCCCACCGCTGGCTGAACTGCCCCCGCTCC  
GCACGGCTCTGCGAGAGCTATGAGGACAAGGGAAGTGGCTACGCCGCCGAAGGCACCGATG  
CGCACAGCTTGTGTGAGTTCAAGCTGAAATCGGTACTCGGTGTGGAAGCGAAAGACCCTAC  
AGAGAGGCTTTTTATATTACAGCGAGGAAATGGAGGACTGCGCCAACGGCTATGCCTCCTATG  
TGCTGGAAGTGGTGAAGCGAGAAAGCAGACCTGTGCTGACCCGGTTGTGTTGATTGAGCA  
ACGTGTCAACTTTTCTCGTTGGGTTGAGAACGGCTTCGGAACAGCCGACTGCATCATCATCA  
CAGACGGGACGCTCCGAGTAATTGACTACAAAACGGGCTCGGCGTTCTGGTCGAGGCGGA  
AAACAATCCTCAAATGATGTTATACGCGCTCGGCGCTCTGGAAATCTTCGACGGCATCTACG  
ACATCGACACGGTCAGTATGACCATCTATCAACCGCGTCGTTCCAATGTCAGCACCTTCACG  
CTGTCAAAGGACGATTTGTACCAATGGGCGGAAGATACGTTGAAGCCC GCCCGCCGAAGTCCG  
CCTATGCCGGTGGCGGCGATTACAAATGCGGCGATTGGTGCCAATTCTGCAAGGCGAAACA  
CGACTGCCGCAAGCGTGCGGAATACAATCTGGAAGTCTGCTAAATTTGACTTCCAAGTCCGCG  
CGCTGCTACCGATGAGGACGTTGAAGAAATCCTCGGCCGCGTCGATGAACTGGTATCCTGG  
GCAAACGACATCAAAGACTACGCCCTGCAGACAGCGGTCGGAGGCAAGGAATGGCACGGCT  
GGAAGCTGGTGAAGGTCGTTCCAATCGTAAATATACAGATGAAGTGGTCGTGGCTGAAAC  
CGTTACGGCGGCAGGTTTCGACCCCTATGAGCGCAAGGTTCTGGGCATTACCGCCATGACCT  
CGCTGCTCGGTA AAAAACGCTTTGAGGAAGTCTCGGCGGTTACATCGAAAAGCCGCAAGG  
CAAACCGACGCTCGTGCCGGAGAGCGATAAACGCCCGCAATCAACACGGCAAAGCAAGAT  
TTTAATGATTATGAGGAGGACAAATAATATGTCTAACAATGAAAAACAAGCAATCCCATG  
AAGGTTATCACCGGCATCGACACGCGCTGGAGCTACGCAAATGTCTGGGAGGCAAAGAGCA  
TCAACGGCGGCACGCCGAAGTTTTCGGTCAAGTCTCATCATTCCCAAGACCGATACCCGCACC  
GTGCAGAAAATCAAAGCCGCCATCGAAGCCGCATACCACGAGGGCGAAGCCAAGCTGAAA  
GGCAGCGGCAAGTCCGTGCCGCTCTCGCCACCATCAAGACCCCGCTCCGCGATGGCGATAC  
CGAACGCCCGGACGACCCCGCTTACGTAAATGCCTACTTCATCAACGCAAAGTCCGCTACCG  
CTCCCGGCGTCGTCGACGCAGACCGCAACGTGATTCTACCCGTTCCGAGGTATACAGCGGC  
GTGTACGGCAGAGCGAGCATTTCCTTCTACGCCTTCAACTCAAACGGCAACAAGGGTATCGC  
CTGTGGACTGAACAATCTTCAGAAAATCCGCGACGGCGAACCCTGGTGGCAGAGCCAGT  
GCTGAATCCGATTTTACAACCGACGAGGACGAGGATTTTCTCGCATAAAAACCAGATACCCG  
AAGGGTGGCGGAGCAATCTGCCACCCTGTATGGGTTTATGAAAGGGCGGTTGATTTATGAAA  
TCACTCAGCATAGACATTGAACTTACAGCAGTATTGATCTCTCAAATGTGGTGTTTACCG

CTATACGGAAGCGCCGGATTTTGAAATTCTGCTGTTCCGGATATTCCGTTGACGGCGGTGAAG  
TACAGGTGGTTCGATATTGCAAACGGTGAAAGCATCCCAGAGTACATTCTCACAGCTCTTATG  
GATAACGACGTGGTCAAATGGGCGTTCAACGCACAGTTTGAGAGGGTCTGCCTTTCCCGGTA  
TCTACGGGATATCGGATGTTTCGATAACACAGGTTACAGCATTCTCAGGATACTGTCCGCA  
ATTACCTCACCCCGGAAGCGTGGCGATGCACGATGGTGTGGTCCGCATATATGGGACTGCCG  
CTCTCGCTGGAAGGCGTTGGCGCGGTGCTTGGTCTTGAAAAGCAGAAGCTGACCGAAGGCA  
AAGATCTCATTCCGGCATTCTGCGTACCCTGCAAGCCCACTGCCGCAAACGGGCAGCGCACA  
CGAAATCTGCCTTCGCACGTCGCAGAGAAATGGGTGACCTTCAAATTATATAACAAACGCGA  
CGTCGAGACGGAGATGTCGATAACAATAAACTGTGCAAGTTTCCCGTGGCGGATTCCATAT  
GGGACGAATAACCACCTCGACCAAGAAATAAACGACCGGGGCGTGGCCCTGGATATGACGCT  
CGTCAGAGAAGCCGTCGCAATTGATACACGCTCCCGCTCCGAACTGACACATATGATGCAGA  
CCCTCACCGAACTGGACAATCCCAATTCGATTATACAAATGAAACAGTGGCTCTGCGACCAG  
GGGCTGGAAACGGATACCCTCGGCAAAAAGGCGGTAGTGGAACTCTTGAAAACAGCGCCGC  
CGGAATTGCGTGATGTGTTGACGCTCCGTCAGCAGTTGGCAAATCTTCGGTGAAAAATAT  
CAGACGATGGAAAACGCGGTCTGCGCCGACGGACGCGCTCGCGGTATGTTCCAATTTTACGG  
TGCAAACCGAACCGGGCGTTGGGCTGGCAGACTGATTCAAATGCAAATCTGCCACAGAAT  
CATCTGCCGGACTTGGAACAGGCTCGTGGTCTTGTCGCTACGGCAATTTTGGAGGCTTTAGA  
AATGCTCTACGACTCGGTGCCGGAGGTACTTTCGGAACCTGATACGCACGGCTTTCGTTCCGA  
TGCCCGGACGCAAGTTTATCGTTGCGGACTTTTCTGCAATCGAAGCCCGTGTCAATTGCGTGGT  
TCGCAGATGAAAAGTGGCGGCAGAAGGTCTTTGAAAGAGGCGGCGATATTTACTGTGCGTC  
CGCATCTCAGATGTTTCGCGTCCCGTGGAGAAACACGGTGTGAACGGGCATCTGCGGCAAA  
AAGGCAAAATCGCTGAACTCGCACTCGGTTACGGCGGCTCTGTAGGTGCGCTCAAAGCAAT  
GGGTGCTCTGGACATGGGACTGACCGAAGACGAGCTGCTTCCGCTCGTGTCCGCTGGCGTT  
CCGCCAACCCGAACATTGTGAGCTTCTGGTGGGATGTCGACCGCGCCGCGATGAAAGCTGTG  
AAGGAAAAAACTGCGACCGATACACACGGCATCTGCTTTGCGTATCAGAGCGGGATGCTTTT  
TATTATACTTCCGTCCGGCAGACGGCTCGCCTATGTGAAACCGCGCATCGGAGAAAATAGGT  
TCGGCGGCGACTGCATTACCTATGAAGGCGTCCGGCGGTACGAAAAAATGGGAGCGCATCGA  
AAGTTACGGTCCCAAAATCGTGGAACATCGTTACGGCGACAGCCCGCGATATTCTCTGCT  
ACGCAATGCAGACGCTCCGCCATTGCTTTACTATGCATATCCACGACGAACTGGTCATT  
GAAGCCGACAGGCGTATGTCGCTTGAAGCGGTCTGCAAACAGATGAGCCGCACTCCGCCTT  
GGGCGCAAGGGCTTAAACTCCGCGCCGACGGTTATGAGACGGATTTTTATAAAAAAGACTG  
AATTTTTTCGTTCAAGATCCCCATTTCCCTCCAGTGAGTTTTGAAGGGGTATTACCCCTAACA  
AATTCGCTGGAGGTTTTTATGAACACTATTCAAATTTATCGCTACGAAAATTGCGATGTGCG  
CACAGTGAACAAAAACGGTGAGCCGTGGTTCGTTGCGGCGGATGTATGCAAGTTCTTGAA  
CTCGGCAATCCCACAATGGCTTTGGAGCGTTTGGACGAGGACGAGAAAGCCCTCATTTCAAT  
TGAGGGCTTGAGCAGAGGGAACGACAACGGAATATCATAAACGAACCCGGCTTGTACACG  
CTCATTCTCGGCAGCCGCAAGCCGACGGCACGGGCGTTCAAACGCTGGATTACTCATGATGT  
CATTCTTCCATACGTAAGTACGGCGTTTATGCCACAGACGAACTGCTCGCTGACCCGGATG  
TCCTCATCGCCGCAATTGCAGGAACTCAAAGCGGAGCGCGAGCATAAAAATTGTTACAGCTC  
ACGGCGGCGATTACAGGAACAGCAGATTGCCGAGATGCAGCCGAAAGCCAGCTATTATGATC  
TCATTCTTCAAACAAGAACACCGTTCCTATTACGCAGATTGCCAAGGACTACGGCATGAGC  
GGCCGCGCGTTTAAACAAGCTGCTTCATGAACTCGGTATTCAGTACAAGCTGCGTGAAACATG  
GCTTTTGTATCAGGATTATGCCAATCAGGGCTATACACAGTCCCGCACCCACGCTATCGATG  
CCGACCGAAGCGTTATACACACTTACTGGACTCAAAAAGGCAGACTGTTCCTTTATGACCTG  
CTCAAAGCAAGCGCGGCATTCTGCCCGTAATTGAGAGGGGTTTGAATGAGTATAGACAA  
ATACAACGCCGAGGGATATTACGACCCGACCGCCTATGAAGCGATGACCGTCATCGAAAAA  
GAAGAACGTGCGCTTCGGGCGTTCAGACCCATTGTGTATATCTGCTCGCCCTATGCCGGAGA

TACGGAAAACAACGTAAAATTCGCGCAGAGATACAGCAGATTTGCGGTAGACAAAGGCTAT  
ATTCCAATCGCGCCGCATCTCCTGTTTCCGCAGTTTATGAATGACGCCGATCCCACAGAGCG  
AAAGCTGGGTCTGTTCTTCGGAAACGCCCTGATGAGCAAATGCTCCGAGGTATGGGTATTCCG  
GCGAACACATCTCAGCCGGTATGGAAACGGAAATCAAACGCGCCCGGTGGAAAAATTACCG  
CTTGCGCTATTTTACTAAAAGTTGTGAGGAGGTTCAAAAATGATGTTACGCTATAACCGTGC  
CGATTGTATCGGCAATCGCGGGAACCTGCCTGTATCCGAATAAGATAAATGTACACGGACGAAT  
CCGCGCTGAAAGAAGCGGTCAGATGCGACTATGTGTGCGCTGAGTACCAGAACAGCTACCG  
CAGCGGAGCCAATTACATCGGCGCGGACTGCCTTCCCGTCGACTGTGATAACGATCATTCCG  
AAGACCCTTCTGACTGGGTCGCTCCCGCCGACATTGCCGACGCCTTCCAGTGTTAAATTCT  
CCGTGCATTACAGCCGCAACAACATGAAAGAGAAAAATGGCAAAGCCGCAAGGCCCAAGTT  
TCATGTACTCTTTCCCATCGACCGCGTTTCCGATGCAAGCCTTTATGCGGATATGAAAAAGTT  
GGTCTGCGGCATCTTTCCGTTCTTTGACACACAGGCTCTTGATGCCGCTCGATTCTTTTTTGGT  
ACTGTTACACCAGAGGTGCGAACTACATTCCGGCACAATGAACCTGACCGCCTTTTTTGCAGGC  
AGATGACTTCGATGCAGATATGGAGAACAACGGTCAGCCCCGCGTCATTGCCGAGGGAAGC  
CGGAATGCCACTATGTCACGATTTGCCGGGCGCGTACTTAAGCGGTACGGCGATAACCGAAG  
AGGCGCATCAATGCTTCTGCGATGAAGCCGCAAAATGCTCTCCGCGCTGGACGCACAGGA  
ACTTGCCATCATCTGGCGCAGCGCACGGAGTTTTTATCAGCGCATAACAGCGGCAGGACGGAT  
ATGTACCGCCGGAGGTGTACAACCTCTGATGTTTCTATAAACC CGCGATTCTCCGATGTC  
GGACAGGCTACGGTTCTTTCAAAAACTTCGGCAGCGAACTCAGATATTCACCGGCCACCCA  
TTACATCCGCTACAGCGAAAATTACTGGCAAGAAACAGAACC CGGTGCACAGGCGGTGCGCA  
CAGGAACCTACCAGACGCCAACTGGACGAGGCGACCAGTGA CTGCTGACCGCTGTAAAAA  
TGCTGTGCGGAGGTGCGGCGCGCAGGAAATATTGGACACCACTTCGAAGAGTAAGGCCGAGTC  
GCTGTTCAATGATGAGCAGGCCGAAGCCTACTCCGCTTTCCTTGCCGCGAAAGCATATCAGT  
CCTTTGCCATCAAGCGCAGGGAGTCGAAAAACATCACGGCGACGCTACGGGAAGCACATCC  
GATGCTGGAAATTTCCGCCGCGAGACCTTGATACGGATTGCTTCTTCTGTGTACGCTGCTGC  
TACCTATGATCTTCGCAAAGGTATGGGCGGTGCAAGAGAACATTCCCCGGAGGACTATATCA  
CTAAAATTACCTCCGTTTCGCCCGGCGATAAAGGCGAAAAGCTGTGGAGGGGACACCATCAA  
CCTTATTTTCTGCGGTGACCGGATTCTGATTGATTATGTGCAAATGGTCTGCGGCCTTGCCGC  
CATCGGCAAAGTATATCTGGAAGCACTGATTATTGCCTACGGCGACGGCCGCAACGGCAAG  
TCCACCTTCTGGAATGTGGTATCCCGCGTAATGGGCTTATACAGCGGAAACATCTCCGCCGA  
CGCGCTCACCGTTGGGTGCCGCGAGAAACATTAAGCCGGAAATGGCCGAGGTCAAGGGCAAG  
CGCCTATTGATTGCGGCCGAGCTGCAGGAAGGTACGCGCCTGAACAATTCGGTCGTAAAGCA  
ACTATGCTCTACGGACGATGTATTCGCGGAGAAAAAGTACAAAGACCCGTTCAGTTTTACAC  
CCTGCCATACGCTGGTTCTTTACACAAACCACCTTCCGAAGGTGGGTGCTTCAGACGCAGGA  
ATATGGCGCAGGCTGATTGTCATTCTTTCAACGCCAAGATTGAGGGTGAAGGCGATATTA  
AAATTTTGCCGAATACCTTTTTGCCAACGCAGGCGAAAGCATTCTTGCATGGGTTATCGAGG  
GCGCGAAAAAGGTTATCGACATCGACTTCAAATCCCGCTCCCGAAGTGC GTTAGCGACGC  
AATCGAGGCGTATAAACGGGAAAACGACTGGCTCGGTCACTTTCTTGAGGATAAATGTGAG  
CTTGGCGGCAACTTTCGGGAAAAGTCCAGCGACCTCTATGTGCGCATATCGGAATTACTGTGC  
CGAAACGAATGAGTTTGTACGCAGCACCCACGGATTTCTACGCAGCCATTGAGAATGCGGGCT  
TTAAGAAAATTAAGCCCAAGGGCAGGAGTTTCATTACCGGGCTTCAACTGAAGGTTGACGA  
CGGTGATTTTGAGGACTTCTTGAACCTGAGGGTGAGGGTTCGATGAGGGTCAAATACTAAAAGT  
CCCTTTAGGAGTAAAAAAATTAGTCTAAAGAGAGTTTTATGAAATGACCTCATAGACCCTC  
ACCCAATATGAAATTCGCATTATGGAGGCTCGGAATATGAGAGAAAAAACAGTAGAAGCAA  
AACTCGCAAAGCGGTAAAAAGCATGGGCGGCATCGCGCTGAAAATATCATCAGCTAATTA  
TGACGGCTTTCCCGACCGCCTTGTACTTCTCACTGATGGGAAGCTGGCGTTTGTGGAAGTGA  
AGGCACCGGCAAGAAGCTGCGTCCCTTG CAGGAAAAGCGAAAAAAGCAGTTAGAGACACT

TGGCTTTTCGGTATTCTGCATTGACGGTATAGAACAGATTGGAGGGATACTCGATGAGATAC  
GAGGCACATGATTATCAGAAAATACACCACCGAGTATATTGAAAATCACGATATAGCCGCCA  
TATTCCTTGACTGCGGACTTGGTAAGAGCGTCATCACACTGACCGCCATAAACGACCTGCTG  
TTTGACAGTTTTGAAATCCACAAGGTTCTGGTCGTGGCTCCCTTGAGAGTTGCCAGAGATAC  
ATGGCCTGCGGAGTTTGAGAAAATGGGAGCATCTGCACGGGCTGACCTATTCCACAGTGATCG  
GCAGTGAGGTTACAGCGCAAAGCGGCTCTCCTGAAAAAACGGACATTTACATCATCAACCG  
TGAAAATGTGGAATGGCTGGTCACCAAAGCGGTCTGCCCTTCGACTACGATATGCTGGTGG  
TCGATGAGCTATCGTCCTTCAAGTCCTATCAGGCAAACGCTTCAGAAGCCTTTCGTCGGTG  
CGGCCTAAGGTGAAGCGCGTGGTCGGGCTGACGGGAACGCCGTCCTCCAACGGTCTTATGG  
ATTTATGGGCGGAGTTCGCGCTGCTGGATATGGGCAAACGTCCTCGGACGGTTCATTACTCAT  
TTCCGCAGCGACTATTTCAATCCTGACAAGCGCAATCAGCAGATTGTGTTTCAGCTACAAGCC  
GAAGCCGGGTGCGGAGGAAGCGATATACCGCCTTGTGTCCGATATCACCATAAGCATGAAA  
TCCACCGACTACCTCAAGATGCCGGAATGCGTTATAAACGAAGTTCCCGTTCGGCTCTGTGA  
AAAAGAGATGGAATGTTACCAGACACTAAAGGACGATTTGATTCTAAGCCTTGACGGACAG  
GACATCGACGCCGCAATGCCGTTGGGCTGTCCAATAAACTGACGCAGATGGCGAACGGTG  
CGGTTTACGGCGAAGATGGTAAGGTCATAGCGGTACACGACCGAAAGCTGGACGCGCTGGA  
GGATTTAATAGAAGCCGCCAACGGCAAGCCGTGCTGGTAGCCTACTGGTTC AAGCATGACC  
TTGAGCGTATACAAAAATGCTTCAAGGTGAAAAAGCTGGACAGCGCCGATTCTATAAAGCG  
GTGGAATAACGGCGACATCCCCGTGGCGGTTCGTTTCATCCAGCATCCGCCGGGCATGGTTTGA  
ACCTGCAGTCGGGCGGTTCCATGCTGATATGGTTCGGACTGACATGGAGCTTGGAAGTGTAC  
CAGCAGACCAACGCCCGTTTGTGGAGACAGGGTCAGACTGCTGACACGGTGGTTCATTACC  
ACATCATCGCCGAGGACACCATTGATGAGAAAATCATGGCGGCTCTGCGGAAAAAGGATAA  
AACACAGTCCGCGCTTATAGACGCCGTCAAAGCAGACTTAAAAATCTAAGACAATCTTCGAC  
AATCCGTGCCAATCCGAGTGAATTTTATTATTCGGAGGTACGTCATGAGTACAACAGCAGTG  
AAAAAGTATCTGTGCGCAGGCAAGATACCTTGATATGCGGATTGATTCTAAAATCCAGCAGAT  
AACCTCCCTCAACGAACTGGCTACGAAATGCACGGCGACGCTGACCGGGATGCCGAGGAAT  
CCCAATCACGGCACGTCCACAATGGCTGACGCCGTTGCGAAGATTGTGGATTTGCAGGCAGA  
GATCAACCGCGACATTGAAGAAGTGGTGGATTTGAAGAAGGAAATCACAGGCGTCATCAAG  
TCCGTTTCCAACCCGGAGTATCAGACTATTCTTGA AAAACGCTATCTGTGCTTTCTGTCTTGG  
GAGCAGATTTCCGTGGACATGAATTACAGTATGCAGTACACCTTCCGTATGCATGACCGTGC  
CTTGACGGAAGTTGACGCTTCTTTGAAAGTGGAGAGTCAAGTTGATTGAATGAGAGTCGGTT  
TATATGATATTCTTATAATGCGGAAACAGAATACAGAGAGCCTTGTGGGAGCAATCCCACAG  
GGCTTTTCTTGTGTA AAAAGAGAGCCGTTGTTACGCGGCTCTCTCTCCTCATTCTTTGTCTTC  
AGATTTTATTGTGATGACAGGTAATGAGGTTTTGCCATCGGATGGCAACTGCTGTTCAATTA  
CCTTTTGTATGAGAACTTTAATGCCGCATCGATATCTTTGACTCAAGCTTTAGTGCCAACT  
TCCCATCAAAGAACAGATACAGCGCGCTGTCATCACCTTTGACTCCTACTTTTTTGTATGTTGA  
TTTCAAACCGTGATTTCATTGGTACACCTCCTTCATAATAGAGCGTGTTTTTTTCGCGAGTCA  
TAGCTCTTCATAAAAGCCCATGTAAATTCGCGTGCTCATCGCTCTTTATGACAGGAGTTATA  
AGTTTTGTAAGAGGAGGTGAACCGATGCCCTACAAACCAAAGCGTCCCTGCGCCTACCCCGG  
TTGCGGTTCGGCTCGCTGTGCGCGAGCAATACTGTGCCGAGCATCAGAAGGTCATGGACAAA  
CAGTACAACAAGTACGAACGCGACCCGGCTTCCAACAAGCGCTACGGTAGAGCTTGGAAGC  
GCATCCGCGACCGCTACATCAAAGCGCACCCGCTGTGCGAGGAGTGCCAAAAGCAAGGTAA  
TCTGACCCCGCCGAGGAGGTACACCACATCCTGCCGCTCTCACGCGGCGGTGGCAATGCCG  
TAAACAACCTTATGGCGCTCTGCAAGCCTTGCCACGCACGTATCACCGTCGAGATGGGAGAC  
CGCTGGCACGATCGATGAGGTTTGTACTACATTTTGATACAAACCAAATAACAATCATTCAT  
CCCGTGACCCGGTAGGGGTATCAAATCTCTAAAACAAAATTTCTGGACAGCGGCGTGGG  
GCTTCGTGTTAAAAACGCGGTTTCAAACGGTGAATAGGCCCAGCACAAAAGGAGTGTGA

TGAAAATGGCGAAAGACGGCACCTGCAGAGGCGGCGCTCGCATCGGTGCAGGCGCAAAA  
AGAAGCCGCTCGCCGACAAAATTACAGCCGAAACCCCGGCGGCAGAAAAGTACCGTGT  
GGAGTTTTCCGACACAGCCGACCTTCAAGGTCAGGCGATGCCGGAGCCAAACAAAATGCTC  
GAAGCCGTACAAAAGGACGGCAAGACGCTCGTCGCAAGCGAAATCTACAAATCCACATGGA  
CGTGGCTGAACGAGCGCGGCTGTGCAGCGCTTGTATCTCCACAAGTTCTGGAACGCTATGCC  
ATGAGCGTTGCCCGGTGGATTCAATGCGAGGAAGCGGTACCCGAGTATGGCTTTCTGGCGAA  
GCACCCACCACCGGCAACGCGATACAAAGCCCGTATGTGGCGATGAGCCAGAATTCATG  
ACGCAGACCAACCGTCTATGGTATGAGATTTTCAAATTTGTGAAAGACAAGTGCACAGGAG  
AATACAGCGGAGCCAATCCGAGGATGATGTGATGGAGCGGCTTTTACTGCTCGGAAAGG  
AAAATAATATGACTACTTACAAAACAGCAGAAAGCGTCTGCGCTGGACACCCGGATAAACT  
GTGCGACATCATTGCGGACAGCATCCTCGACGCCTGTCTGCGCAAGGACAAGTCCCTCCCGCG  
TCGCCTGCGAGGTTATGGCGACCAAGGGCAAATTATCGTTGCGGGCGAGATCACCTGCGA  
CGGCAAAGTCGACATCCGCTGGGAGGTGCGTGAAGTCCCGCAAGGTCGGCTACAATCCG  
TGGATGTTTACAGTTTTCGTGTTCGTTTATAAACAGAGCAGGGACATCGACGCCGGGGTGAC  
TACTGCCCTCGAAGCCCGAAACGGCAGTGAGGAACGCTATGTCTCTATCGGTGCGGGTGACC  
AAGGCACCGTGTACGGCTATGCCACAAACGAAACCCGAGAGATGCTTCCACTCCCGCTGGT  
GCTGGCGCATCGCATTGTCAAGCGTGTGGATACCGTTCGCAAGGATAAAAATTGTGAAAGGC  
ATTTTGCCGGACGGCAAAGCGCAGGTTACGGTGAATATGAGGACGGCAAGCCCAAACGCA  
TAAAAACAATTATCGTTTTCCGTACAGCATGACAAGAACAAAACGCAGGAGCAGCTTTACTC  
GGACATCAAGCAGAATGTGCTGTGGCAGTGCTTCGAGGACTTCCCTTTGACGATGACACCG  
AAATCCTCATCAATCCCTCCGGCAGATTTGTGAGGGCGGACCCCGCCGCTGACACAGGGGCTT  
ACGGGCAGAAAGATTATGGTGGATACTTATGGAGGGATTGCTCTTCATGGCGGCGGCGCATT  
CAGCGGCAAAGACCCCAAAAAGGTCGACCGCAGCGGAGCTTACATGGCGCGGTACATCGCA  
AAAAACATCGTATGGAGCGACTTGGCTGAGAGATGCGAGGTCGCTCTTTCTTATGGCATCGG  
CAAGGCAGACCCCGTGGCGGTTAACATCGACGCTTTCGGCACGAGCGCCCTACCAATGAA  
GAACTGCGTAAAATTGTGCTGTCCGTGTTCAACCTGCGCCCGGCGGCAATCATTGAAAACT  
GCGTTTGCGCAATGCGATATACGAGGACACAGCGGTATACGGACATTTCAATTCCTGTCTCT  
TTCCGTGGGAGGATTACGATAGGTACAAAGAAATCAGAAAGGCGGCGGAGAAATATGCTGA  
TAGAAAAGATTCAGACTGATCGGCTCATCCCCGCCGACTATAACCCTCGCAAAGACCTTAAG  
CCGGGCGACCCGGAGTACGAAAAGCTGAAACGCTCGCTTGAAGGAGTTTGGCTATGTAGAAC  
CCGTTATATGGAACAAGATCACCTCTCATGTCGTCGGCGGCCACCAGCGTCTGAAGGTGCTG  
CTTGATATGGGCATCACCGAGGTGAGTGCCTGGTGGTTCGAGATGGACGCCGAAAAGGAAA  
AGGCGCTCAATGTCGCACTTAACAAAATCAGCGGTGACTGGGATAAAGACAAAAGTGGCTCT  
GCTTATCGCCGACCTGCAGGGCGCGGACTTCGATGTTTCGCTCACAGGCTTCGACCCCGGAG  
AGATTGACGACCTTTTCAAGGATAGCTTGAAAGACGGTATTAAGACGATGAGTTTGATGTG  
GATGCGAACTGCAAAGCCAGCCGTCACCAAGCCGGGCGATGTGTGGCTGATCGGACGGC  
ATCGGCTTGTCTGTGGTATTCCACAAAAGCCGACACCTTCACTGCTCTGATGGATGGGAAG  
CTTGCAAACCTCGTGGTGACCGACCTCCGTACAACGTCAACTATGAAGGAACGGCGGGCA  
AAATCAAAAACGATAAATATGGAAAGCGGAGCGTTCTACGATTTTCTGCTGGCGGCGTTAACG  
AATACCGAAGCGGCGATGGCGCAGGACGCTTCCATTTATGTGTTCCATGCCGACACCGAAGG  
GCTGAACTTCCGCAAAGCGTTCTCGGACGCGGGCTTTACGCTTCCGGGTGCTGCATCTGGA  
AAAAGCCATCGCTGGTGTGGGACGCTCGCCCTATCAGTGGCAGCACGAGCCTGTGCTGTTC  
GGCTGGAAGAAAAAAGGCAAGCACAAGTGGTACGCCGACCGCAAGCAGACCACCATCTGG  
GAATTTGAAAAGCCGAAGAAAAACGCCGACCATCCACCATGAAGCCGATTGCGCTCCTGG  
CATATCCATTATGAACAGCAGCCTCACAACTGCATCGTGTGCTTGACCCCTTCGGCGGCAGC  
GGCAGTACGCTCATCGCTGTGAGCAGTCCGACAGAATTTGCTTACCATAGAGCTTGACGA  
GAAATACTGCGACGTCATTGTAACCGGTACATTGAACAGGTTGGGAATGTAATAGTGTTT

CCGTTATCCGCGACGGTGTACGATGAAATATGCGGAGGTATTCTCCGATGAGTAAATTAAC  
ACTTGGCTCCCTCTTCGATGGCTCCGGCGGCTTTCCGCTCGGCGGTCTGCTCTGCGGCATCAA  
ACCGCTCTGGGCTTCGGAGATTGAGCCGTTCCCGATACGGGTAACGACCAAGCGGATACCAC  
AGATGAAACACTACGGCGACATCTCCAAGCTGAACGGTACAGATTTACCACCGGTGGATATT  
ATAACCTTCGGTTCGCCCTGTACCGATATGTCAGTTGCCGGGAAAAGAGCCGGTCTGGACGG  
AAGCCAATCCGTCCCTTTTTATGAAGCAATACGAATTATGAAGGAAATGAGGTGCAAGACCA  
ATGGCAGATACCCAAGATACGCTGTCTGGGAAAACGTGCCCGGCGCATTTCAGTTCAAACCA  
AGGGGCCGATTTCAAGGCAGTCCTCGAAGCGGTTGTCAGCGTCACCGGGAAAACGCCGAG  
GTGCCTGCGCCTGACAACGGGCGGTGGTCTTACGCCGACTGCTACATGGGAGACGGATGGTC  
GCTGGCTTACAGAACTATCGACGCTCAATATTTCCGAGTACCCCAGCGCCGCCGAGAATCT  
ACCTTGTCGAGATTTTGCAGGCGAATGTGCCGGAGAAATACTATTTGAGCCGGAAGGCGTG  
TCAAGGAATTTTGCGCCGTGCGGCAGCCCGTGGCAAAGAAGTCCCGGAGATGCTGAGAACG  
GCTCTGGAACAACAGGCAGCGGCATAACCTGCCTGAACGACCAAGGCGGTGACCGTATGGA  
TATCACCGAAGATACGACGGCTACGCTCCGCGCCGAAGCCATCACCCGCCCTGCGTCATGC  
AGTCGAGCGGATTCTGCACAGAGCATTTCGGCGAAGAGCCGTGGTGTGGGGTTTGAGGAAGA  
ACGCTCTCCCACGCTCCGGGCGGTGTCGTGCCTGGTGTGCAATCGAAAACCATCCGACCG  
ACGGTCGTGTCAAGGTTTCAGAAGACGGCATGGTGCAGACACTTACTTCCCGTATGGGAACG  
GGCGGCATGAACACTCCGCTAATACTTGACACACCGAAAACGCTTAAAATACGCTCCGGCTG  
TGAGGGAGGCGGCAAGGGTGCCTGATACAGGATGACAAATCCGCTACGATCGGCTGCAAC  
AATGACCAGACGGTTTTTCGTGCCGACTGCTTACGGCATCTGCTCCGACAAGAGTAATTCCAT  
GATGTCGGATAATCCTCGCAGCGGCATTTACAAAGCTGCCACTTCTCGAACCATCGATGCGA  
ACGGCGGCAACCCCGGCTGCAATCAAGGCGGTATCGCTGTGGTTGCACTCCAAGGTTCCATG  
ATTGGACGTGAGGAAAAGAACGGGCCCCAAGGCAGTGGCATTGATGAAGATGTGTCTTTCA  
CATAAATACGGTCGACCGCCACGCCATCGCCTATGCTATGACCACAGGCAGCTTTGCACAG  
GTAACGGAGGAAAATCGCCGACGCTCATGTGCGGGGATTATAAAGACCCTCCGCTTGTTAA  
CCAGCCGGACTACATCGTCCGCAGGCTGACGCCAACTGAATGCGCCCGGCTTCAAGGCTTCC  
CGGACGGCTGGTGCGCCGGTCTCGGTACGGATAACCCAACCGAGGATGAAATCGCGTTCTG  
GGCTGAGGTTTGGGAAACTCACCGCCGTATTATCGGCACAAGCGAAAAGCCCAAGAGCCGT  
AGGCAGATTATCAAATGGCTGCAAAGCCCGCACTCCGACGCTGCCGAATACAAGATGTGGG  
GCAACGGCGTGGCACTCCCGTGCCTGCTTTGTGCTTACGGGGATTGTGTCATCTACACAA  
GAAACCGCCTGATTATCGGGACATCATTCTCTATATAAAAATGCTCCGAATTGCTTGATAAA  
TCAGGCATTTCAGAGTGATATATGTATGTACCGAAAAGAGAAAAGGCGGTATAAACAATGACA  
ATCAACTACAATGTAACAGGCAGCGAGCGCAAACGGCTCGTGCAAGCAATCTCGGAAATCA  
TGGAGTGCGACGCCAAATATAAGGGCGCTCCGACCTTCGCCTACGAGGTGGACTATTTACC  
ATCGACAAAACGGCGTCCATCCTTCGATGACCGTGCCGACAGCAAGGAAATCGAAAAGC  
TCATCGAGGGTCTGGCGGAGCGGGGCTTTGAATTTGACGGGTACGACAAGACCGCGCTTACC  
ATTGAAATGCCACGTTCTTTCTTACCAGACACGGCGCTTGAAAATCTCAGCCGATTGGTGG  
AAGCAAAGGCTCGCTAATCAAAAAGGCGCTCGGCATCACCGACCCGTCTATCCTAAAGGGT  
GAGGAGACGGTCAGCTTCCCGTGGTTCCCGATGCATGCGACCCGGACGCAGTAAAGGCTT  
ATACCCACCTTGTCACTGCGCTCTGTGAGATGGCGAAAACACAGAAACGGGTCAGCGCGAC  
CGACAAGCCCGTGGACAACGAGAAGTACGCTTTCCGCTGTTTTCTCCTCCGGCTCGGTTTCAT  
CGGCTCGGAATATAAGGCGGAGCGAAAATTTCTGCTCTCAAAGCTGACAGGCAGCTCAGCG  
TTCAAACAGAATAACTGCAAGGCGGTGGATGAAGATGAATAAGCTTCCCACCGCCTTCTTCG  
TTGAGTATCCATTTTGCATTGAGGACTTAATCCGCCCTTATTTATCGGAATGGCTGAAACCAT  
ATATTGCAGAAAAGGAAATAAGGCTCAGTAAAATTGATTACGAAAACCTTTATAACCGACTT  
ATGTGTTGACAGATGGTTTATAGAAAATACACGCATCTTTGTAGCATAGACGAGAACGGA  
GTTTGGCATTGCGTTTTGGTAAGGCAAAAAGGGAAATCCGAGGGCGTGTTGGTTATGTCCGA



AGGCAGAGTTTTTCTAAATGGGCTGCGTATTTGCCAAGTGAGGAGGTAGCTGAATGAACAT  
ACATCCTGAAATACTCAAACAATTAAGAGATTGCTTTACGCCCGGAACCCGTGTGGAGCTTA  
TTCGTATGGACGATGTTTCAGGCACCGCCCGTAGGTACAAAAGGTACGGTCGTCGGCGTGGAC  
GACATGGGTTCATCATGGTTAACTGGGATAACGGCAGTGGTTTGAATGTGGTATATGGTGA  
AGATTTCTGCCGGAAGGTCGGTAACGGTGATGAATAATAACGTTTTACATGATTTCTATTAC  
GGCAACATCGTCCCCAACGAAAAGCGGTTTCGTGCGTAATTCTGAATTCGGTCGCGCAGCGAA  
AGAAATTTCCGAAGCCGACGAGTATCTTCACTCAATATTGGACGAAGCGGGACTCGCTGTTC  
TGGATAAGCTCACTTCGGCGCAAATGACACTGGATTCCATCACCGCCGAAGAAAATATATT  
GATGGCTTTAAAACAGGGGCGAGATTCATACTTGCTATTATGGATGACCAGTATGGCGATAC  
CCGTCCGGTCACTGAATAGGTATAAATAACTTCGAAGAACAGCGCCGAAACGGCTCTGTTT  
CTCGTACAGATAGATTTTGAGGGCTTGCCGAGGCAGGTCTATTTTTATGCCGTTTTGGAGGA  
GGTGGCGGAAACGCGGAAAATAAAAAATAACAATCCACGCGGTTCAAAGCTGCGGATTTCG  
GTTTACGACAAAGCCGCCGCCGATTATGCCGTATCTTTCGTGCAAGCCCTCTCCATACAAA  
AGGAACATGGGCGGGAAAGCCCTTTGAACTGATCGACTGGCAGGAGCAGATTATCCGTGAT  
GTGTTTCGGAACACTCAAGCCCAATGGCTACCGACAGTTCATAACCGCCTATGTGGAGATACC  
AAAGAAGATGGGCAAGTCCGAACCTTGC GGCGGGCGTTGCACTGCTGCTCACTTGC GGAGAC  
AATGAGGAGCGCGCCGAGGTTTATGGGTGCGCCGCTGACCGCAACCAGGCGTCCATTGTTTT  
CAATGTGGCGGCGGATATGGTTCGGATGTGTCCGGCGCTGGCAAACGGGTTAAAATCCTTG  
ATTCATGAAGCGGCTCATCTATCTGCCGACCGGGAGTATTTATCAGGTGCTGTCCGGCGGAC  
GTCGGCAACAAGCACGGCTTCAACACCCACGGCGTGGTATTTGACGAACTGCATACCCAGCC  
GAACCGAAAATCTATGACGTAATGACCAAAGGCAGCGGGCAGCGGAGAAATGCAGCCGCTG  
TATTTTCTTATCACACCGCCGGAGACAATCAGCACAGCATCTGCTGGGAGGTTTCATCAAAA  
GGCTCTCGACATCCTCAACGGCAGGAAGCATGATCCCACCTTCTATCCCGTCATTTACGGCG  
CGGCGCAGGAGGATGACTGGACTGACCCCAAGGTGTGGAAAAAAGCGAATCCGTGCTCGG  
CATCACGGTCGGCATGGATAAAGTCAAGGCGGCTTTTGAATCGGCACGGCAGAATCCAGCC  
GAGGAGAACAGCTTCCGTCAACTTCGCTTGAATCAGTGGGTCAAACAGGCGGTGCGCTGGA  
TGCCGATGGACAAATGGGACGCTTGC GCTTTTGC GGTAGACCCCGAAGCCCTGCGCGGGCG  
GGTCTGCTACGGAGGTCTTGACCTTTCCTCCTCCACCGATATTACGGCGTTCGTGCTGGTATT  
CCCGCCGGAGGATGAGGATGACAAATACGTCGTGCTGCCGTTTTTCTGGATTCCGGAGGATA  
ATGTGGATTTGCGTGTGCGAAGAGACCATGTGAATTACGACATCTGGAAGAAGCAGGGATA  
TCTTGAAACCACCGAGGGCAACGTCGTTTATTACGGCTTTCATTGAGAGATTTATCGAGGAAC  
TCGGCACCAAGTACAACATCCGTGAGATTGCCTTCGACCGCTGGGGTGCAGTGCAGATGACG  
CAGAACCTTGAAACCCTCGGCTTACGGTCGTGGCGTTCGGTCAGGGATTCAAGGATATGTC  
CCCTCCAACAAAGGAACTGATGAAGCTGACCCTGGAGCAGAAAATCGCTCACGGCGGTCAT  
CCCGTCTGCGCTGGATGATGGACAACATCTTCATCCGTACCGACCCGGCGGGCAACATCAA  
AGCGGATAAAGAAAAGTCCACCGAGAAAATAGATGGCGCGGTAGCAACTATTATGGCGCTT  
GACAGGGCAATTCGGTGC GGCAATGAAAGCGGTTCTTCGGTTTATGATGATCGCGGGCTGCT  
TGTTTTTTAGTCAATGAGTGTGACAAATACTCATTAGTGTATTAGTATATACTCATTGGAGG  
TGACCGCCATGAGTAAAATGATAACAATAGCCATCGATGAGGATATCTATGAAAAATTCTGC  
ATCGCACTAAACCTTACTAAAGATGATGAGCCCAAGGCAATCGAACACTGTATGAAGTGGT  
ATATCGCAAAAAGCTTTGAAAAAGCGTCACAGACCTATAATCCCAATGCGAAAGCCAAACC  
AATTGAAGAAATTGCAGGCGACTTTCATGGAAAAGCAAATCAGCGCATCCCATCATGGGCA  
TTCAAACCGACGCAGTATAATCACAAAATAATCCGTGCTTTTTTTTATGGTGGAGCAAGTAAC  
GGGCAGGGTTACGATTGCTGAATTGGA AAAAGCTATGTAGCAATGAAGCCGTACCGGAATTA  
TATGTACCGACTTTTAGAAGCAACTACGCACAAATGAAGCTGGACGCTCCAAAAAGCCATG  
GCAAAGTGTGTTGAGGATGATGGCGGAGACCGTTACAATTTGGGGTGAAGTCAAGGATACGTT  
GATGCAATATAAAGAATACTTTTGAATGCAGAAAGGTGAAAATATATGTCATATCAGAAG

AAAACAATCAAGGCAAGCCTTGATGATATAAACAGTGGTAAAATGTATCTTCCTGCTATACA  
GCGTAAATATGTGTGGAGTGAAGCGCAAATTATTAAGTATGATGGATTCAATTTTGCTTAACT  
ACCCATTGGTACTTTCTTGTGTTTGGAAACGTCGAGGGGAAAACGATAAATGAAAAGCAATAT  
TCCCTATATGAATTTATAAAGAATTACCATGAGCGGGATGCTTTCATCAATCCTCACGCGCC  
CAATCCGATTACTAAAGAAAATGTGTTTGCGGTCTTGATGGTCAGCAAAGGCTGACATCGC  
TATTCATCGCGCTTCAAGGCAGTCTCGCCTTGAAGCTTCCAATGAAGCGTTGGAATAACGAT  
GATGCCTTCCCTGCAAAAGAAGTGTACATGAATTTGAAAAGCAAGAAAAAAGATGACGATG  
ATGAAATCACTTATGAGTTTGCCTTTTAACTGCAAAAGAAAGTGAAGAAAAATAGAACCTGAT  
AACTGTGGTATAAGGCAAAGGACATCCTCAGATATGATACCACCGATGAGGTTATGCTCTC  
CGTAATTACCTCAAACGGATGGAATGATGCGGTTGTCATGAAAAATATTTTGGCTCTGCACA  
GAAGCTTAGTAACAGAAGAGATAATCAACTATTTTGAATAAAGAAGGATTCGATAGATGA  
TGTCCTTGATATTTTTATCCGAGTAAATTCAGGGGGCACAGTGCTTTCAAAAAGCGACTTGCT  
CTTTTCAACGGTAGTTTTCACACTGGGATAAAGCAAGGGATGAAATCGAAGAAGTCTTGA  
ACAATAAATAACATTGGGGAAAAGTACAAATTTACAAACGACTTTATTATGCGTTCCTGCCT  
TTATTTGCTTGATATGCCTGTTTCGTTAAAGGTAGAAACATTTAAACGGGACAGCGTTCCTAA  
AATCAAAGAAAAGTGGGATGATATAAAGATGCGATTGTCAGTACGGTCAAGCTGCTTGAC  
GAGTTTGGATTCAATTCGAAAACATAATTTCTTATGTTGCTATTACACCAATGGTGTATTAC  
AAGTTCAATGGAGGGACTTTTCGATACAGACAGTAAAGGAGAGCTTCGAAAATACATAGTTA  
TTGCTCAAGTCAAGCAAATTTTCGGTACAGCGAGTAATTTCTGCACTTACAAGTATACGCGAA  
GCTTTATCCGGCAAATGTAATCATTTTAAATTTCCACTCTTTCTTCTGTTTCGTTTCACTGGCG  
ATAGAAACCTCAGATACACCGAGGATGAGATTACATCTTTGTTTGGACATTGAAATAGGAGCA  
TACACATTTATGATTCTTTCTTTGTTGTATCCTAATTTAAAATACAGTCAAAAAGGATTTTCAT  
CAAGATCATATGCACCCATATTCCGCTTTCAACGATAAGAACATTAATCTCTGTCACTGGA  
TGATGCCACACGAATTGAATGGCAGCAATCAAGAAATAAGTTAGCCAATCTTCAGCTTTTAG  
AAGGTCGCGAAAATGAAAGTAAAATGACATGTCGCTTATTGAGTGGTTGAAAGAACCGAT  
GAATAGCGAAAATGTTAAGTATTTGCCAAGTAACATTTTCATATGAGTTGCGTGATTTTGCTA  
AATTTATAATTGAACGGCAAAGCTAATGAGTGCAGAGCTTAAACGAATTTTATATGAGAA  
CAAATTAACATAAAATTCGAAGGAGCGGGTTGAAAAAATGGATATTGAAACATTGAAGA  
AAATGGCTAATAACAAAAGTAATTGGCGTGAAAGATTACAAGCCGTTGAAGAATTGGGTAA  
AATGGATTGTCAACAATCAAAGACATATTAGCGAGATTAGCAATTCATGATCCTGTTTTTC  
GAGTTAAAGAAGTTGCTTTTCAGAGCTGCGCAAGCTCGTAATATTACATATGCAGGTAACCT  
ATTTTTCTTGGGAAAAGCCAAAAGGCAACCTGATTGAAGGTATAAATAAAAAGCTCACAG  
TTGTTTCGTAATAAGCTGAATGAAGGTTTTACGCTTGATGATTTCAAGCAAAAATTTGCGGAA  
ATGTATCCTGAAGCCTACGATACATATGAAGGTGATAAGGGTGAACAGTTTGAAGAGTGGTT  
ATCTAATGTGATTCCACATGCCAAATAAATAGTAATATGCTTCGAAATTCAAAAAGCATC  
TCGCAAGAGGTGCTTTTTTTGTACCATATTAAGGAGAGTGTATGTCTATGGGATTATTAC  
AGGAATATTCAAGGCACGTGACAAGCCTCAAACAGTTTAGGCGGCAGCCGTTACAGTTTCC  
TTTTCGGAAGCACAAGTGCGGGAAAGCCGGTCAACGAACATACCGCCATGCAGATGACGGC  
GGTCTATTCCTGCGTGAGAATACTGTCCGAAACGGTTGCCGGGCTGCCACTTCATGTGTACC  
GCTACAACGACAGCGGCGGTAAGGAAAAAGACCTGAAACATCCATTATACAACTGCTCCA  
TGACGAGCCAAACCCTGAGATGACTTCATTTGCGTTCCGGGAAACGCTGATGAGTCATCTTT  
TATTATGGGGCAACGCTTACGCGCAAATTATCCGAAACGCCAGAGGTGAGGTAATCGCCCTT  
TATCCGCTTATGCCAAATAAATGACGGTCGACCGCGATTCAAACGGCCGACTTTTTTACTT  
GTATCAGCGCACTTCGGAGGATGTACCCTCGCTCGGGAAGGACAGCCAGGTCTACCTTTCTC  
CGGCCGATGTACTGCACATTCCCGGTCTGGGCTTTGACGGTCTGGTTGGGTATTGCCCCATTG  
CGATGGCGAAAATGCCGTGGGACTCGCCATTGCCACCGAGGAATATGGGGCGAAGTTCTT  
CGCCAACGGAGCCGCGCCGGGCGGCGTGCTGGAGCATCCCGTACTATTAAGACCCGCGAG

AAGGTCAAGGAAAGCTGGA ACTCCGCCTACCAAGGCTCGACGAACGCACACAGGGTGGCTG  
TGCTGGAAGAAGGCATGAAGTACCAAGCCATCGGCATCTCGCCCGAACAGGCACAGTTTTT  
GGAAACACGGAAGTTTCAGATCAATGAAATTGCCCGTATTTTCAGGATACCTCCGCATATGC  
TCGCCGACCTCGAAAAATCTTCCTTCAGCAACATCGAGCAGCAGTCGCTGGAATTTGTGAAA  
TACACACTCGACCCGTGGGTGGTGGCCTGGGAGCAGTCCATGTGCCGCGCCCTGCTCATGGA  
AAGCGAAAAGCCCGCCGTGTTTCATCAAATTCATGTGGACGGGCTGCTTCGCGGGCATTATC  
AGAGCCGTATGAACGGTTACGCCACGGCAAGGCAGAATGGCTGGATGAGCGCCAACGACAT  
CCGGGAGCTTGAAAACCTCGACCGTATTCCAGCGGAGCTTGGCGGCGATCTCTATCTTATCA  
ACGGCGCGATGACCAAATTACAGGACGCGGGTGGCTTCGCAAATACGACAGGAACGGAGGA  
AACAAACGAATGAAGAAATTCGGA ACTGGGCGCGGGACGAAGAATCCGGTGCCCGTACGC  
TCTACCTCGACGGCACGATTGCCGAGGAAAGCTGGTTTGATGATGATGTCACCCCGAAAGCA  
TTCAAAGCTGATTTGACTGCCGGAGAGGGTGACATTGTTATTTGGATCAACTCTCCCGGCGG  
CGATTGTATCGCGGCGAGTCAGATCTACGCCATGCTCATGGATTACAAAGGCTCGGTCACCG  
TCAAGATCGACGGCATTGCGGCTTCGGCGGCAAGCGTTATCGCTATGGCGGGAACGAAGGT  
GCTTATGGCTCCCACGGCGCTCATGATGGTGCATAACCCGCTGACCATCGCAATCGGCGACA  
GCGAAGAAATGCAGAAAGCCATCTCCATGCTCGACGAGGTCAAGGAAAGCATCATCAACGC  
CTATGAAATCAAGACCGGGCAGTCCCGAGCGAAACTCTCCACTTCATGGATGCCGAAACCT  
GGCTCAACGCCAATAAAGCTATAGA ACTGGGTTTTGCAGACGGCGTTCTTGAGGATGAAAA  
GAAGCGTGTGCAGGCCGAGGATATCACCTACGCTTTCAGCCGCCGAGCAGTCACGAACTCTC  
TCTTGAATAAGTTGTACCCCAAGAAACCGCTGTGAAAACAGGCACACCCGTTGATGTCCGC  
AAAGCCACTCCTGCGGAGTGGCTTCAGAAGCGGCTCTCTTTAATTTACACTAAATTTATAG  
GAGGAAAAACACAATGAGTAAAATTCTTGA ACTGCGTGAGAAACGCACCAAGGCGTGGGAA  
GCGGCCAAGGCTTTCCTTGACACAAAGCGCGGGCGCGGACGGTCTGGTCTCCGCCGAGGATA  
CCGCCACCTACGACAAAATGGAAGCCGATGTGCTGGCACTCGGTAAGGAAATCGACCCGCT  
GGAAAAGCAGGAAGCACTCGACCGTGAGCTGTCCAAGCCGCTTAACGCCCTCTTACCGGC  
AAGCCCGCTGTTCCCGGCATGGAGGTCAAGACGGGAACGGCTGCCGCTGAATACAAAAAGG  
CAATGCTGGACGCCCTGCGCTCCA ACTTCAAGAGAATCAGCAATGTCCTGCAGGAAGGCATC  
GACACGAACGGCGGTTATCTTGTCCCGATGAGTATGACAGCCGCTGATTGACGGTTTGAC  
CGAGGAGAATATCTTTCGTAAGCTCGGCACTACCATCAAAACGAGCGGCGAACACAAAATC  
AACATTGCCGCCACCAAGCCCGCCGCGCATGGATTGAGGAGGGCGGTACGCTCACCTTCG  
GAGACGCGACCTTCGCACAGATTATTCTCGACGCACACAAGCTTCATGTGCTGTGAAAGTC  
ACCGAAGA ACTGCTCTACGACAACGTTTTCAACCTCGAAA ACTATATCCTGACGCAGTTTAC  
CAAAGCTCTCGCCAATACAGAGGAGGATGCATTCCTCAACGGCGACGGTACGGGCAAGCCC  
CTCGGCATCTTCGACGCAACCGGCGGTGGGCAGGTGCGCGTGACCACTTCGGGCAGTTCCAT  
TACAGCCGACGAAGCAATCAACCTTGTGTACACACTGAAACGCCCTTACCGCAAGAACGCA  
GCGTTTATACCAATGACCAGACTCTTTCGGTCCTGCGCAAGCTGAAGGACAACAACAGCGC  
ATATATCTGGCAGCCTTCCTATCAGGCGGGCGAGCCGGACAGACTTCTCGGTTATCCCGTTT  
ACACGTCGGCATATGTTCCCGTCATTGCCGCGGAGCGCCGGTTATGGCATTTCGGAGACTAC  
AGCTATTACAACATCGGGCACC GCGGTTCCCGTTCTTTCGCGGAGCTCAAGGAACTGTTTCGC  
CGGTCAAGGCATGGTTGGATTGCTCGCCAAAGAGCGCGTGGACGGCAA ACTGGTATTGCC  
GAAGCCGTACAGATTCTGAAAATCAAGGCTTAATGAAAGGACAGTGGCGGTATGACGCTGC  
TTGAAAAGTAAAGGCAAACCTCATTCTGGAACACACGGCGGACGATGAACTCCTGCAGAT  
GTACATCACCGCCCGGTTAAATACGCCGAAAGCTATCAGCATCTCACAGAAA ACTATTACA  
CTGAACATCAGATGCCGCTACCACTGAGCAAGCCGTCATCATGCTGTCGTCCTCACTTCTAT  
GAATCCAGGGACGGCAGCACGGGCGGCTTTTTTGCTGACAACGTGCAGGCCGGGCAGCAGG  
TGTGGGACACGGTCAATCTGCTTCTTCGGCTCGACCGGGATTGGAAGGTGTGAGCATGAGTT  
TTGGTAAAATGAACACCTTCATCGACATCACAGCAAAAACA ACTGTGAAGGACGCGGAAGG

CTTTATGACGGAATCCGATACCGTTGTAGCTTCCGTCAGAGCGTACCGGGAGGGTTCGGCACG  
GCACCGAAAAATGGGCTAACAGAGCCGCTTTCTCGGAAGCCTCCGACCTTTTCTGTTTTTCGTT  
GTATCCCGGGCGTTACTGTCACGACCGCAATGGTCGTGGTGAACGACGGCGACCGCTTTGAA  
ATTACCTCGGTCGAGGATGTGAAAGGTCGCGGGATGTACATTGAAAGTGCTCGCCAAGGAGG  
TGAAGCCGAGTGGCTAAGGCTGTCATGAAAATGCCGGAAGACTTCCTTCTGAAGCTTTCCCG  
GCTCGGAGAAAAACGGATGAAATCATCCCAAAGGTACTGGAAGCAGGCGGCGAAGTTGTG  
GAAGTAAAAGTGAAATCCAACCTGCAAGCCGTTATCGGCAGCGGCACTAAGGAAGACAGCC  
GTTCTACAGGCGAGTTGGTTTCTACGTTGGGTGTTTTCTCGGCAAGACAGGATAAGGACGGG  
AATTTCAATGTAAAAGTAGGTTTTTCCGAACCTCGTTCTGACGGCAAAAGCAACGCCATGAT  
TGCGGGAGTACTGGAATACGGGAAAAGCGGTCAGCCGCCGAAGCCCTTTCTTAAGCCCGCA  
AAAACAGCAAGCAAAAACGCCTGCGTTGACGCGATGATCGCGGCGTTTGAGAAGGAGGTTCG  
AAAACATATGAGCCTGCTGGAAGAACTAAACACCCTCCTCTCACCGCTTGTCCCCGTTGAGA  
CAGGTGTGTTTTCAAATCCGCCCGGACAGATATGTTGTGATTACGCCGCTGGCGGATACT  
TTTGAAGTGTATCCGACGACAGTCCCCGGAACGAATCACAAGAGGCGCGGCTGTCCCTTTT  
TGATAAGGGCAGCTACATATCTGTGAAAAACCAAATCGTCCGCGCTCTGCTAAACGCGGAAT  
TCACCATAACCGACCGCCGGTATGTGGGCCATGAGGACGATAACCGGCTATCACCCTATGCC  
ATCGATGTGGCGAAAATTTACGAACTGGAGGAATAACAAATGGCGACAATCGGACTTGATA  
GGCTGTTCTACTCAAAAATCACAGAAGCAACGGACGGCACCGAACTTACGGCACTCCCATT  
TCGCTTGCCAAGGCGATGAAAGCGGATCTATCAGTCGAGCTTGGCGAGGCGACGCTTTACGC  
GGACGACGGACCCCGCGAGGTGCTGAAGGAATTCAGAGCGGCACTCTCTCACTGGGGATC  
GACGATATCGGCGTGACAGCCGAGAAGACCTGACGGGCGCAAACTTGACGACAATCACG  
TCGTGGTATCCGGCAGCGAGGACGGCGGCACTCCCGTCGCTGTAGGCTTCCGTGCAAAAAA  
GTCAAACGGAAAGTACCGCTATTTCTGGCTTTACAGGGTGAAATTTGGTATTCCGGCGACCA  
ACCTCGCCACCAAGGGCGACAGCATCACCTTCTCCACTCCGACCATCGAGGGTACGGTGTTC  
CGCCGCAACAACTGGACGGAAACGGCAAGCATCCGTGGAAAACCGAGGTCAACGAGGAC  
GATACGGGTGTTCCGGCTTCTGTTATCACCGGCTGGTACTCGCAGGTCTACGAGCCTGTGTTT  
ACAGCGCAGGTCGGAGGTGAAGGCTAATGGCTGACGAAAGAAGCACGAAAATCACCATCG  
GCGGCGCGGAGTATGAGATGCTCTTGACCACCAAGGCAACGAAGGAAATCGCGGGGGCGTA  
CGGCGGGCTTTCCAATCTCGGCGAAAAGCTGATGAAAAGCGAGAATTTTCGAGATGGCTCTC  
GATGAAATCGTATGGCTCATTACGCTGCTCGCCAATCAGTCGGTACTGGTACACAATCTGCA  
AAATCCCGCGAAAAAGCGTGAGTTGCTCACAGAGGAGGCTGTTGAACTGCTTACCTCGCCCT  
TTGAACTTGCGGATTACAAAACGCCATCATGGACGCAATGTATAAAGGTACGAAGCGTCA  
TGTGGAAGTGAGGACGAACCCTCAAAAACGCGGAGGTCGGGTAAGCGACGAAGAGTTGT  
TTGCCCGGCTGATTTTTTATGGAACGACCCTGCTCAGCCGGGCGGAGTCCGAAGTGTGGCTG  
ATGCCGATCGGACATCTGCTCGACCAGTGGGAGGTATACAAGCAGTTTAACGGTTTGGCAA  
GCCAAGCGCGAGTATTACATCGACGAAATCATAACCAATGGCATCTGAGGAGGTGGTGAG  
ATATGGCGGACAATTTCCGGCTTGAAAATCGGTGTTGAAGGTGAAAAGGAGTTTAAAAAGGC  
ACTCTCCGACATCAATCAGTCGTTCAAGGTTCTCGGCAGTGAGATGAAGCTGGTCGAGTCCG  
AATTCGGCAAAAACGAAAACAGCGTCCAGTCCCTCACCTCCAAAATGAGGTGCTGACCAA  
ACAAATCGACGCCAGAAAGATAAAAATCGAAACGCTCCGTAAGCGCTGGAAAACGCCTCC  
GACTCCTTCGGCGAGAATGACCGCCGACCCAGCAGTGGGCGGTGCAGCTTAACAACGCGC  
AGGCGGAACTCAACGGCATGGAGCGGAACTGAAGGACAACGAAAAGGCTCTGGACAATG  
TGGCTGACAATTTTACGATGCCGAGAAGCAAGCCGACCAATTCGGAGACGAGCTTGAAAA  
AACGGGCAAGGAAGCCGATTCCTCCGGCGGCAAGTTTGAAAAGCTCGGTTCCGTAGTCAAG  
GGTATCGGAGCGGCTATGGGTGTGGCTTTTCGCCGCTGTCGGCACCGCCGCAATCAGCGCGG  
CAAAGCTCTCGTGGATATGACCGTGGAAGCCGCCGCATACGCGGATGAAATGCTGACACAG  
TCCACCGTGACAGGTATGTCGGTTGAGAGTCTGCAGGCGTACAGTTATGCCCGGATCTGGT

GGATGTGTCGCTTGACACGCTGACCGGCTCTATGGCGAAGAACGTCAAGTCGATGTCGAGCG  
CGGCAGACGGTTCGCAAAATATGCCGACGCGTACGCACGGCTTGGCGTATCGGTTACCGAT  
GCCAACGGCAATCTCCGAGACAGTGAGGACGTTTACTGGGAGGTCATCGACGCACTTGGCG  
GAGTCTCCAACGAAACGGAGCGTGACGCGCTCGCCATGCAGTTGTTCCGAAAATCGGCGCA  
GGACTTGAATCCGCTCATTGCCCAAGGCAGCGAAGGCATTGCCGCGCTGACAGAAGAAGCA  
AAACGCATGGGCGCTGTTCTCAGTGAGGAGAGCATCGAAAACTCGGTGCCTTCGATGATTC  
CGTTCAGCGGCTGAAGCAAGGCTCGGAAGCCGCAAGCGCGTGATGGGTACTGTTCTTCTTC  
CGCAGCTTCAGACGCTTGCGGATGAGGGAACCACACTGCTCGGCGATTTACATCCGGATTG  
GTGGACGCCGGGGACGACTTCGGCAAAATCAGCGAGGTTATTGGCAACACGGTTCGGCGGGC  
TTGTTGACATGATCATGGAACATTTGCCGAAAATAATTCAGGTCGGTATGGACATCGTTATG  
GCTATCGTAAACGCAATCGTTGAAAATCTGCCGACCATCGTGGAGTGCGCGTCCTCTATCGT  
CATGACGCTCTTGGAAGGGTTGATTGACGCACTGCCCGCTATCACGGAGGGCGCGTTACAGT  
TAGTGCTGACACTGGTTCAAGGCATCATTGACAATCTGCCAGCTATTATCGAAGCCGCTATT  
CAGATGATCGTGACTCTGGCCTTGGGCATTGCGGATGCTCTGCCGGAAGTATTCCATCCAT  
CGTCGAGGCAATCCTCCTGATTGTTTCAGGTGCTGCTCGACAATATGGACAAAATCCTCGAAG  
CTGCCTTCGCCATTATAAAAGGATTGGCAGAGGGTTTGCTGAACGCACTGCCGGAAGTATC  
GACGCGCTACCCGAAATCATAACGACCATTATTGATTTTCATCACGGACAATCTGCCTGAAAT  
CATTGAGATGGGCATCGAGCTCACCGTTCAGCTTGCGGTTCGGGTTGATAAAAGCCATAACCGC  
AGCTTGTGGCGAAACTGCCGAAATCATCGCCGCCATCGTGACCGGCCTTGGGAAAGCGGT  
CGGCGCTGTGTTTGAATCGGCAAGAACATCGTCACGGGGCTATGGGAAGGCATCAAGTCC  
CTCGGCTCCTGGATCAGCGAAAAGGTATCCGATTTCTTCTCCGGTATTGTTGACGGCGCAA  
AAGCCTGCTGGGTATCAACTCGCCGTCAAAGGTATTTGCCGGAATCGGTGAAAATATGGGCC  
TCGGTATCGGCGAGGGCTTACCAGCGCCATGAAGGACGTTGAAAAAGATATAACAGACGC  
TATCCCAACCGACTTTGACCTTGATATGAATACCGGCATCCATAAGGTGATGAACGACACCT  
CGCTCGACGTGAAGAAAACCGTGGAACATACGGGTATTATCCGGGTCGAGGGCGTTAATAA  
CGAAGGCGAAATGACCTCCGTTGTGGATATCATCATCGACAGGCTCAGACAGGAGGTGCGC  
GTATGAGTTATCTGAAAAATACGGAGGCAAGTGAAATCATCACGCGCTTTGTCAGCTTCCGA  
AAAACGCAAGAGGTTATCCGAACGGTGCAGACCGCCCTTGACGGGACGGAGTATTTGACCC  
GCTTCGGTTCGCCGACCGTGCATTATGAGTTGACACTCTATGTTAATGAGACCGGAAAAGCC  
GCGCTGATGTCAGCCGAAGATAGCGTTCGCTGCTTGAATGCTCAGTAAAGCAAGGCGTTTT  
CACAGGGAGGATTGTTGAACTCGGCGATTTTGATTATCAGGCGGCGGGCTGGTATAAGGTCA  
CAGCCACTCTTGCGGCAGTAAGCGAGGTGAGCGACCCATGAGAAGCATAACCGATAGCGCTG  
AAAGAAAAACTCGCAAACCGCTTCAAGGCGGAAAACACGAACAGCATGGCAAACTCCGTG  
TGGTAGCCACACAGACCTCCGTCAATTCGCTGCTCTCAGAGCCGATTCACGAAGATATCTCT  
CCCGCATTCGGCGATGTAGCCGTGCGCCAGACGGCCGGAGAATCCGATTTATCTCTTGCCTA  
TGCCATCTGTTTGGATGACGGTATCGCGAATGTGTATAAACGGAAGTTTCCTGCTGGTATGG  
AGTACCTGTGGGAATACCAGTGACGCTTGGAGCGGCGACCGATGTGGCGATTGAATTTAA  
CGGCGTGTGGAAAATGAACGCCGAAAAGGAATGGTATTACCTTCAAACCGAGGAATATCCC  
TATGTTTTTTATATACGGGATGGGAATCTGTATGTTTCAGGTCTGGCGTGACAGCGATAATGC  
CTCTCTGCTTGCAACCGGCGTTTCCAGATATCCGCTTGCAAGGGCTGGCAGTCCAGTGTCG  
AACAGGACCTCGACCAAGGCTTGATCATCGGCTACCTCAAAAGCGGCTCGGTGTATTACCGG  
GCGCTCTGCTGTCAGGAAAACGGAAGCTATGTCTGGGAAGCAGAGCATGAAGTGACCGCGC  
TTGGTACGGGCAACACGACGCTGTCGGTTATCCGCACCAACGATTTCCGTATCGGATTCCTG  
ACGCAGAATAACGGTTCGAATGCTTCTGGCGCTGACACACCGAAACTATGCCGGGATGAGCG  
TCCGGCCGGATACAGTCCATATCAACGCTTCCAATGTGAAGATGTGGATTTCCGATATAACC  
GAACTGGACACGCTGAACACTGAATACGCTTCCGGAAATACTGCCTATCCCTATGTTCTGCT  
GGACGAGCCGGACACGGAAGAAATCTCCGTAACCTTGGTAGAGAAGCTGAACCGCGAGACA

GGTTTCGTTTGTACGGCTTCAAGGTCCATCTCACAAAGCCTTTATACGGAAGTGTTGACGCA  
GGGTTTTTCGGTGAAATGCGCCCTGTCCGTTTTCCGGAGTAACCGTTACCTCTGCGGCCTATGAC  
AGCGAGGAACAGGGCCTTGTCCCTTTATACGAGCGCCGATATCCGCAGGACGGTAGCCGTGA  
CCATAACGATGCCGGAATACCGCTCACTCTGGTATTACAAGTTGGGTTCTCAAAGATGGTTC  
CTGCCCCGCTCTAAGTGCTGTGCGCCGCTGCTGAAACCGTAGACTTCCAAACCTACGAAAACGA  
GACAGCGGGCATTTCGATAGTTTCAACAGGAGCATGGATTGACGAGGCTTTATTACCCAGT  
GTTTCCAGCCC GCGCATAACGGCTGTCATTACGGTTGTGGCTTCGTCTGTTAGCCTGCAGCCTG  
TTTTCCACATTACCGATTTAGGAGGTTTTCAAATGAAGATACAAGAACGAGCCGTTCTTCAC  
AACCGGTTTTGACGTCAAGGTCGTGACGCGCAAGCGGCAAGGTCAAGCAGACGGCGGTGCG  
GCTTCAACGTCATTACAACTACTATTTTAAACAGCAGGCTGACGGCTTCTCCGCTTAGTAAA  
ACGACAGACCTGTTCAAGATATATCGCGGTCGGCACCGGAACGGGGACACCCGCCGTTACGG  
ATACCGCCCTTTTACGCATCTGACACGCAAAGCAGTGACGACGCTGGAAACGGTTTTATGAA  
TATCCGACTTCGCATACGACAAAGCAGATCAAGCTGGAAGCGACGGAGTGCAACGGTAGTA  
CAATCACAGAGGTGGCGCTCGAAGGTTATTACAGCGGCACCTTTTCTACTACTTATTACATC  
ATGTCCCATGCCATGCTGCAGGATTCCGAAGGAAACCAGATCGCGATCGCCAAAACCGATA  
CGGACGTGGTGTATATAACGGCAACCTTCTACGCCACCTGCACCCCATCCGGCTTCGGCACA  
AACGGCATTATCCCACGGCCGAGAGCAATTGTCTGTTCCAATGGCTACTCACGGGCAATAC  
GGACGGGTATGTGCGTTTTTCCCGCTTTCAGTGGAGTACTCCTCGGATATGAACGTAAAAT  
ATCACGGTAGTAAAAGCTATTCCTTACGCGGCGGCACCGGCAATACCACTACCTACCAGTAC  
GACCTGCCTGTTACAACATTCCTTGACAGCGAGTGCAACAACCGCATCGTCAAGCATCTCGG  
CGTCGCAGGGGTGCGGAGCGTTACCTTCCCGAACCATGAGGTTTTTCCGCCCTATGCGGTCG  
ACCATCTCGTTATCGGCGAGGGCGATGGAACGACGACGGAGTTCAGTATGAAGTGCCCGCT  
GATACAGTCCGGGACCGTCCGTATTTTTGTTAATGACACGGAAATGACCGAAGGCACGGATT  
ACACGGTGGATTTGGAGAATAACTGCGGCGACTGGTATGAAAATATCACACGGCGGTGAT  
GACCTGTAAAACGCCGGAGTCTCCTTCGGTGACCTTGCGTCAAAAACGCCAAGCAGCAGCT  
ATTCTTACCGCGACCCTCTTGCCTGGTGGAATTGCTATGATACGACGGTATATCCATCTTCT  
GCATGGTGAGCGATGTAAGCCCCATTAATAAGACTTTGGGACTGCAAAGCCTTGTAATACG  
CTGAAAATTGATATTCTGACCGTCCCGACCGCAAGGCTCGATATTCTTAAAATACAGTATTC  
AGCCAACGACACCGACTGGACGGATGTAACAGGTCTTCAAGGACAGGTCAGGTCTGGAAA  
TTCACGGAGGTATCGGCGCGGTACTGGAGGGCGTTTTTGTAGCGGCGAAGGGAACGCCACCG  
TCGTGCTCACATCAAGCGGCATGACAGGCTCGCCGATCACTCTTCCGTACCTGTTGCCTCAT  
CAGATACGGCGAGCGTTGTGGCGGGCAAGATAAAAACAGCCCTTGAAGACAATGCGAATAT  
TTCAGCTTTATATGATGCGTCGGTTTCGAATGCAAATGTAGTTTTAACCGCAAAAACGCCTAT  
TGCGAATGTCTCGAGTTTGAATATCGCCCTGTCAAACGGGACTTGCGCGGGCTTGACCACAG  
TTTCAACCTCGACCAATACGACTACCGGAGTAGCCGCCGTAAAGCAACAGGAAAATATCTAT  
GTGACCGGAACCATAGGGACTGCGGGAAACGCAACGGTTGTCGTAACGGCCGCTGGAATGG  
CAAACCTCGCCTATAACCCTTTCGGTGCCGTTACAAGTGGCGACTCGGCGACAACTGTTGCG  
ACAAAGGTAAACGCGGCTCTTGGAGCAAATTCAAATATCACGGACTTCTTTACAATCAGTGC  
GGATAACGGCAGATATGTGCGACTGACCGCAAAAACAGCAGCGGATAATGATTCTACCCTA  
AATATCAGCATTGCAAATGATACTTGCACCGGGTTGACTGCTATACCGACATCCACCGTTGA  
TGCCGCAGGCAACGCGGGTACAAAACAAGTGGAGACCTTAACCGTATCGGGCAGTGTCAGC  
TACAGTTGGACTTACAGTTTATATTACCAGAGCTTCCCGACAAGGGACGGTCAGAGCTTCGG  
CTCGACTTTCTTTTTGGGGAAGACCGTGCCGGGACTCATTTTTACGGCTCCGCCCTGCCGACGG  
CGCTGCTATTACAGCCAGCTTTGCGCTTGAATATCCGTTCAAGACCGAGAACAATCTGTTGC  
GCTTACCTACTCGGTTACAGCTGCAACGGGGGTGACACCATGACGCTGACATTTGAATATAC  
CCTTGATACCGGAGCAGGCTTGTATCCGCAGGTGATCCACACCTCGGACAACCTGCTCGGTT  
TCATATACCTCACCGCCGACGGCACCGTGGCGGGAAGCACAGCAGACCCGGTTCTCGGTTG

TACGATAATCTGACCTATACGGAAACCGGCAGGATTTACCCGATGAAACGGTATCGTATCC  
AAGTATCAAAAAAGTGGCGCATTACGGCGCATAACGGATTCTGGAGCGCCGAGGGCGACCAC  
CGTTTTGTCATGTATATGCTGCCGACAGATATCACGAATTCCTTTATTGACGGCTCGGTCAA  
TTCAGCATCGGAAGCGAGGTTTCGCAAATGTCCTGCACCTTGCTCAACATCAAGGGGGCGCT  
GCTCAATCGCTACCGTGCTTTCGTGACGCCCGGTACTAAGATGGAGCTGTACTTTTCTCTCG  
TAGCAGCGGCCGAAATCACGCTCGGCATTTTCTATATCGATCGCGCTTCGGTTTCGTACCCGG  
ACGAAAAGGTATCGGTATCCGCCAGAAACGCAATCGGCAAGCTGCTGAAGGAACAGACCTT  
CAACGAGGACAACACCTTTGAAGGTACAACGCTTCAGCTGAACCTGCAGGAAATTCCTCGCC  
TCGCCGAGGTGGAGAATTTTTTTGTCGGCGACAGCACAAAGGCATGGAAACTCCGCTTCGAA  
CCGGATGTCGCCATGCTGGACGGTATCAAGCGGGTAATCTCCTTGCTTGACGGCTGGAAGGT  
CGATGAAACGGCAAACGGTGTTATCGGCGTGGCGGGCAACAGACGCCGTTTCGACCAG  
CCCGCCGTGTATACCTTCGAGCGCGACAAGACCTGCTGGAACACAGCGTGGAATATGACG  
ATTCGGAAGCGGTCAGCAGGGTTTGCCTCACCTGCGCCGATCCGGAAAACACGGTCTACGCC  
ACCGTCCCAAGAAACAAGTGGTGGATTCAGCCGTCCCACAGAACGACCTATGTAACAGCCG  
CCGACGGTGCAGCGCTTGCTGAAATAACGGCGATGGCCGAGGAACTGGCGCAGGCCATCGC  
CATATCCGGCAGGCAGGAGAGCTTCGTGGCATCTTCACGCCCCAGCTTACCATCGGGGACG  
AGGTGCACATTGTCAGCGGAACAAGACCGAAACCATCGGTACAGTCACGGATGTTACGCA  
CAATTTCCGGCAGGGGCGGTTTTCTATACAGCGTTCACCGTGGACAGTGGCGGACGGCAAGGC  
AAAGCGCGTCTTTCCGATTTAATCGGCAAAGCATCCGAAAAGTCCAATCTGAACGGCGTGAC  
TATTTATTAAGGGAGGAATAACAACATGAAAGAAATCTGGAATTGGATTCAACTCGCGCTGT  
CGGCAGTCCGGCGGAGCAATCGGCTGGTTTTTTCGGCGGCATGGACGGTTAATCTATGCGCTG  
CTGGTGTGTTGTGATCGCCGATTATATCACGGGCGTCATGTGCGCGATTGTGGATAAAAAGCT  
GTCCAGCGAAGTCCGCTTTAAGGGCATCTGCAAAAAGGTGCTGATATTCGTAATGGTCCGCA  
TCGGACATATCATGGACACCTACCTCATCGGCAACGGAGAAGTTCTGCGGACAGCAGTCATC  
TTCTTCTACTGCTCCAACGAGGGTGTCTCGATGCTCGAAAATGCTGGGCATCTCGGACTGCC  
CATCCCGGCGAAACTCAAGGACATTTTGAACAGCTTCACGACAGATCGGAGGACAAATAA  
ATGAACCTACACAAACTCATTCTGACCAACAACGCCTGTTACAAGGCGGGCAGAACCATTAC  
CCCGAAAGGCATCATGGTGCATTCCACCGGGGGCAACAATCCCAACCTCAAACGCTATGTCC  
GTCCCGATGACGGCTCGCTTGTAAGAACCAGAACATAATCACTGGAATCAGGACAAGCC  
GGATGGTTCGACAGGTCTGCGTCCATGGCTTCATCGGCAAGCTGGCTGACGGAAGCATCGCCA  
CCTATCAGACGCTACCGTGGAAATCACCGGGGCTGGCATTGCGGCAGCGGTTCAAAGGCTCC  
GGCAACGATACGCATATCGGCTTTGAAATCTGCGAGGACGGTCTGACCGACACCTCGTATTT  
TTCTGCCGTTTATAAGGAGGTTGTTGAGCTTTGCGTGTATCTCTGCAAGCAATATAACCTTAC  
CGAAAAGGATATTATCTGCCACTGTGAGGGTTACAAATTGGGCATCGCCAGCAATCACGGC  
GATGTGATGCACTGGTTCGGAAGCACAGTAAGTTCGATGGATACCTTCCGCGCCGAGGTCCG  
AAAGCTGCTCGTTGCATCCGGCACGGAACAACCTGATGCGTCCGCTGATGAACCTGCCATTT  
TCGAGCCGTACCGCGTCCGTGTTAGCATCGCAACTTTGAATATCCGTAAAGGTCCCGGCACC  
GACTACGGCGCTCTGGGAAAATATACGGGTAAAGGTGTGTTACCATCGTAGAGGAAGCCG  
ACGGCGCTGGCTCTTCAAAGTGGGGGCTACTCAAGTCCTTCAAAGCAAGCGCAACGGCTG  
GATTTCTCTGGACTACGCCGATAAAGTATAAATACCTATTAGAGAATAGCAAGTAACCACGGG  
TCAAATAGTTGACCTGTGGTTATAGTTTCAGACCCGCGACTGTGATATTTCACTCTCGCGGGT  
CTTTTTTTTTGCTCTTTTTTCGTTCAAGACGCCGCTTTCCCTCCAGTGAGTATTGAGGGAGAG  
ATCCCTCGGACTGGAGGATGACCAATGACGAACGAGCAAAAAGAGCAAATTAAGGTGCTG  
CGCCGTACGGGATATGGATACTCGAAAATTGCTCAAAACTTTTCTATTTCAAGAGAATACGGT  
TAAATCGTATTGCAGAAGAAATGGCTTGAGTTCTGATGCGCTTAATAATACAGCCGCTGCA  
AGTACTGCGGGAAGCCAATAATTATCAAAGAAAAATGTAAGCCACGTCAGTTCTGCTCCGA  
CAGGTGCCGTGTTGCGTGGTGAACATCCATCAGCGCCAAGCCGGGCAAAAACAACGTAT

CACTTTGTTTTCGAAAAATGCGGAGCGCCTTTTGTAGAGCCACGGCAATAAAAAGCAGAAAAT  
ATTGCTCTCATGATTGCTACATTGCGACGCGGTTTCGGTAAGGAGCGCGGCGGCGATGAATAA  
GGAGTATTTTACCGTATTTGCGGCTACAAATCCGCAATGGCGCAGGCTCGGCTGATGCTTG  
TAAAGGGGATTTTAAACCGAGAGCGAGTACCTTGAAATTGATACAATAATGGCCGAGAAATA  
CGGCTTGTCTTCGTGTAGTTTATTCCGCGATAATAAATTGCTATATAAGGAGAACGACGGTA  
ATATGTCACACTACGAGGAGGTGACAAAATGCCGAAAACAGTAAATAAAGTATCGCATAAG  
CCCAGGCTGGCACAGCAGAAAAAGGTTGCTGCCTACGCCCGGTTTCGACTGGGAAAGATG  
CCATGCTTCACTCGCTGTCTCACAGGTCAGCTATTACAGCAAATTGATACAAGGCCACGAG  
GGATGGTCATATGTCGGTGTATTATGCCGATGAAGCCCTTTCGGTACGAAAGACAGCAGAGA  
GAATTTTCAAAGTTACTCGCCGACTGCTGTGCCGAAAAGTGAATATGATACTTACAAAGT  
CCATCTCCCGCTTTCGACGAAACACGGTGACCTTACTGGAAACCGTTCGTAAACTGAAAGCG  
TTGGAGGTGGACATTTATTTTGTAGGAGCAGAATATCCACACATTGAGCGCCGAGGGAGAATT  
GATGCTGACCATTCTTGCATCATACGCGCAGGCGGAGAGCCTTTCGCAAGCGAAAACCCAG  
AAATGGCGGGTCAGAAAAGGCTTTGAAAACGGCGAGCTCATTAATTGGCGGTTTCTGTTTCGG  
ATACCGCATTACAAAAGGGGAAATAGAAATCAACACGGAAACCGCCCGATTGTGTGCGAG  
ATATTCAAGCGGGTCATCGTCGGGGATACCTTCGGTACCATAAGCCGAGACCTGAACGAGC  
GTGGCATTCCCGGCGCGCTCGGCGGAAAATGGTGCGCCCAACGCATCCGCGAAACCGCCGG  
AAACGAAAAATATATCGGAAATGCAATGCTCCAAAAGCACTACCGCAACAATCATCTGGAA  
AAGAAAAAATGTAGAAATAAAGGCGAGTTACCGATGTTCTATGCCGAGGAAACGCACCCTG  
CCATCATTGATGTGGATAGCTTCAATGCGGCCAGATGGTATTACAAAAAATGTGCGATGCC  
GCAAAAACCAGACCGGTACCACAGCAAAGTGAATTCACGGGTTCGATTTATTGCCCGCACT  
GCGGTAAAAACTTTAAGCGCACTACGAGTAACGGCTCAGTCGGATGGAATTGCTCCACCTAT  
TTATCGCAGGGTAAGGCATACTGCCACGAAAAAAGATACCTGAAACCACGCTTCAATCGG  
TTTGCGCCGATGTTCTCGGCACGGGAAAATACGACTCGACTGTTTTTCGGCACCTTGATAGAG  
CGCATTGAAGTGCCGGAAGATAACCACTTACGGTTCGTTTTCAATGACGGGCGAACCGAAG  
AACGCTCATGGGCAGACCGTTCACGGCGGGATAGCTGGACTGCAGAAATGAAGCACACCGC  
CGCAGAAAGAACAAGGCAAAGGAGGAAAAACTCATGTCAAGAGCAGTAACGATGATACCC  
GCTACCAAAAATAAGTTCACGGCGCTCCCGACCGCTTCCATAGCTAAACGCCGCGTGGCGGG  
ATATGCCCGCGTGTCAACGGACAGCGATGAGCAGTTTACAAGTTATGAAGCGCAAATCGAC  
TATTACAGAAATTCATTAAGGCTCGTGATGACTGGGAATTTGTCACAGTGTATACGGACGA  
AGGCATCTCAGCCACAAATACAAAACACCGCGATGGTTTTCAATCAGATGGTTCAAGATGCC  
ATGGGTGGCAAATCGACCTTATTGTCACGAAATCCGTCAGCCGCTTCGCGCGTAACACCGT  
CGACAGTCTGACTACTGTCCGCAAGCTGAAGGAGCACGGCACGGAGATTTATTTGAAAAA  
GAAAATATTTACACATTTCGACAGCAAGGGCGAACTTCTTATCACCATTATGAGCAGCCTTGC  
GCAGGAGGAGAGCCGCTCCATTTACAGAGAACGTACATGGGGTCAGCGGAAACGCTTTGCA  
GACGGAAAGGTCAGTATGCCGTACAAACAGTTCCTCGGCTACGAAAAGGGCGATGACGGCA  
CCCCGGTTGTAAATGAAGAGGAAGCCAAAACCTGTGAGGCTCATCTACCAACTTTTCTTGA  
GGTAAAACTCCGGCGGGGATTTGCAGTTATTTGGATATGCGCGGTACGCTACGCCATCCGG  
CAAACAGAAATGGAGCCAGACTACGGTATACAGCATTCTCAGCAACGAAAAGTACAAGGGT  
GATGCCTTGCTTCAGAAGTGTTTTACTGTGGATTTCTTATGAAAAAGATGAAGGTCAACGA  
GGGCGAAGTCCCGCAGTACTATGTGGAACACAGCCACGACGCCATTATCAGCCCTACCGATT  
GGGACATGGTGCAGGCGGAAATCGACAGACGAAAGACGCTCGGCAGAGCCTACAGCGGGA  
ACAGTATCTTTTCTTCGAAGCTGGTATGCGGGCAGTGCGGTGGATTTTTCGGTCAAAAAGTG  
TGGCACTCCACCGATGCCTACCGCAAGGTGATATGGCGCTGCAACAGTAAATTTAAAGGCG  
AAAAGAAATGCGGGACACCGCACCTTGATACGGAAACGATACAGCAAAGTTCCTCTTGGC  
TTACAATCAGCTGATGCAGAAGCGTGATGGGGTCATCGCCGACTGCACTCAAATGCGCCGG  
AAGGTCTCGGACTGCACTGCGCTGGATGCTGAGATTGAGAAGCTCACCGAGGAAATCGACA



TTGTGGCAGAGATGGTTAAAGCCTGCGTGAAAGAAAATGCATCCTCCGCACTGGCACAAGA  
GGAGTACACAAAAAAGTACGGCAGTTTGGTGAAACGCTATGAAAAGACCGCATTTCGTCTT  
GATACGCTATCTGCGGAAAGAGCGCGAAAACAAGACCGCGACCGTGAACCTCCGACTTTTCA  
TCGAAGCGATAAAGCAACAGCCCCCTCGTCCTCGAAGAATGGAACGAAAGGCTGTGGGTCGG  
ATTGCTTGAAAAAGCCACTGTTTTCCACGAGGGCAGAATGGTATTTTCAGTTCAAGAACAGCA  
CAGAGATTGAGGTTGAGCTATAAGGCTCAACCTCTTTTTTTACCCATTTGCACCTATAATTTG  
CGAAGATGCACACCCCTCCGAAAAAGTGAACACCCACCGATAAATAGTAAATCGAGGGTA  
TGGGACAAGGCAAAAGAACTCGCAAGCGGTGTGTATTTTCTGTGCTTGAGGCAGACTGTGC  
AAAGTGCAAAGTGACGAAAAGCCTTATTTCAAGCCATTTCCGGGCATAAAAATAAAAACGCT  
AACCTCGATACTTACCGTATCAAATTAGCGTTCTTATATGGTGGAGCCGGAGGGATTGAA  
CTCCTGACCTCCTCCTAAATAGAGCTACTCAGATTTTACGGTTTGGCAA

>KBDCA3-12

AATAATCTTAATTAAGTTTGGCAGTTCGGGCAGCAGCTCAAGAAATTTGTCTGCCTGTTCTTG  
GTCATTTACCACTGCCACTCTTACTTCAGCATGGCTGGCAATATATTTAACCTCGTCAGGTAT  
GGAATCAACGTATATACCGGTAGGAATTGCACCAATAGACTGGGCGGCAAATTCCGCCCAA  
AACCATTCGGGTTTATTATCGCTATAATAGCCACCCGGTCGGAAGGTTTGGTACCCAGGCT  
AAGCAAACCCAAACCGAAATATTTACGGTTTGATAATAATCACTCCAGGTATATTTTTGCC  
ATATACCCAGATTTTTTCATACACATGGCAGGCTTATCGCCCCATTGCTCGGCGTTATGTTTTA  
CCAGTTTGGGTATCGTGTCTACTTCAGCCATAACAACCCTCTTTATTTATCTGCCTAAAAAAC  
TTCACCTCCCGCGTGGGGGAGGTGAGTCTGTAAAACACTGTTACCTATAAATCGGTTTACCT  
ATTTTTACTCATCAGCTGCCCCCGAAAGCGCACACAGGGTGCGCCCGGTAAACATGAAGCAA  
AAATAAGTGTAGCCTGCGTATTTTATTGGCGTAGTGTAACACAGGAACAAATAGGTGTCAA  
CAATATTCTTTTATATCCATAATATATTTGTCAGCAACATATCAATCTTGCCTGATTGACAAG  
CCGAAAGCTATTGATTATTCTAGAATAATATCCAACGGGAGAACAAAGGTCTTGAAAAAGCT  
ATTATCCGGCAATGAAGCTTTAGCCTTAGGCGCATATGACGCAGGTCTTAAACTGGCCGCTG  
CCTATCCCGGCACTCCCAGTACCGAAATAATGGAAAATCTGGCTAAATTTCCAGATATACAT  
ACCCAGTGGTCATCTAACGAAGCCGTAGCCGTAGAAGTAGCTACCGGTGCATCGTACACCG  
GGGTACGGGCACTGGCTGCCATGAAACACGTAGGCCTCAATGTAGCCGCCGATGCGTTTTATG  
GCTGTTTTCCACCACCGGTGTAAAGGGTGGATTAGTCATAATAGTAGCGGATGACCCGGCAT  
ACATTCATCCCAGAACGAACAGGATAACCCGCCACTATGCACATCTTTCAAAAATGCCGGTGC  
TTGAGCCGTCAAACAGCCAGGAGGCTTATGATTATATGGCTCTGGCATTGAGCTAAGCGAA  
CATTTTGACACTCCGGTAATTCTGCGCAGTACTACCCGTGTTTCCATTCCAGTTCTCTGGTA  
GAAACCCTCTCCGAAAGACAGGTACCTACCCTGCCAAGCTTCAAACACGACGCCTCTAAACT  
GGTTATGGTACCCACCGCTGCCCGCATGCAGTGGCCGAAGGTACTTAAACGGGAAGAACTG  
ATAGGCGAATATGCCGAAACCTGCCCTTTAACAATAACATACCCGAAATGCCAAACTGG  
GTATTATAAGCAGCGGCATTGCTTTTTCAGTATGCCAGAGAAGTTTTCCCTGAAGCTTCTTTCC  
TGAAGCTGGGTATGACTTTCCTTTGCCAAAAAACCTTATAAAAGAATTCAGCCAGAGTGTT  
GAAACTATATTTGTTGTAGAGGAACTGGATTCAGTTATTGAAGATGCTCTCTGCCGCATGGG  
TATTTCCGGCAATAGGCAAAAAATATGTACCCCGCAGCGGCGAACTGAACCCGGATACCATC  
CGTGCTTCTGCCGTAAAGGCAGGCATACTACCTGAACCAAAGATATTCTGTTTAAACCTGC  
CACTTCAGACTTTCCTCAAGCGGCCGCCGCTTTTATGTGCCGGTTGCCCGCATAACCGGCGTATT  
TTTTACCCTTAGCACACTGGGGCAGCGTTCGGCTCTGCCCGGAAAACCCAAACGTGAGCCCA  
AGCTGGTACTTGCAGGTGACATAGGCTGTTACTCTGGGTGCTTACCCCGCTTTTTCAGCTA  
TGGATACCTGTGGCTGCATGGGCGGAAGCATCAGCCAGGCGGTAGGTATGGAAAAATCGGG  
CCTGACCGAGCCAGTTATAGCCATTATAGGTGACTCCACCTTTATGCATTCCGGTATAAATG  
GTCTAATTAATGCGGTTTATAACCAGTCACGGATAACCATACTTATACTGGATAACCGCACC

ACCGCCATGACCGGCCATCAGGGAAACCCCGGTTGCGGTATTGCCGCAAGTGGTCAAACAG  
TTACCGAAGTGAATCTGGAAGAACTGGTAAAGGGAGCGGGCATAAAAAACCTCCAAATTAT  
CCCTGCTTTTGACCTGAAATCCCTAAGAAACGGGCTGAAGAATGCGATATCCAGCGGGGAA  
CTGAATGTGATAATTGTACGCGGGGAATGCAATGTAATCTGCCGTAAACGTTCTTGCCCAA  
TATTATAGACACCGGCCTGTGCAACCGCTGTGACGCCTGTCTTCTTTTAGGCTGTCCGGCTAT  
CCAGCGTGAGGGTGATAAGCTATTTATAGACCCGGGTCTTTGTACCGGCAATAACTGCAACC  
TGTGCCATCAGGTCTGCCCCAAAAAGCCATTA AAAACCAATGAGGCGGCGTAAGTTTATGAA  
AAAGTTTGATATATTGATTGTGGGCGTGGGGGGACAGGGAGTCATACTGGCAAGTAATGTG  
CTGTGCGATGCGGCTATGGCCGCCGGCTATGATGTCAAAAAGACTGATACGCTCGGCATGGC  
TCAACGCGGAGGAAGTGTAGTCAGCCACCTCCGTTTCTCTAAGGAAGTTCGCTCTCCCCTTA  
TTTCAAAGGGCAAACAGACCTTATTATTGCCTTTGAAAACTGGAGTCTGCCCCGCTATATG  
GAGTATCTGGGTTCAAAAACCAAAGCGGTTATAAATGATATGGCCATGCCTCCGGCTTCCAT  
AAGTCTGGGCCTGTCAAAAATACCCTTCAGATGCCGAAATACTGGACGGATATAACCCGCTTAG  
GTATAAAAGTGGATTTTATAGCCGCAAATCAGGCAGTCAAAGAGCTGGGTAATCCTAAAAT  
GCTGAATATATACCTCCTGGGATATGCCGCCGTTATCTGCCCTTTGATTTTGAAATACTAAC  
CGAGGCTATAAAGAAACGCCTTCCGCCAAAGTTACTTGAGGCAAATTTGAAAGCATTTCAG  
CGGGATACGCAGCGTCCGCTAAGCAAAACTAACTCAAGGAGCAAGTATTATCAGATTCGGC  
AGATGCAATATCTACCAAAGCTTTGAAAGCAAGTCTGAAATTCTCAGTTCACCCACCAGTT  
TGCCTGCATCATCTATTACCGGCATTTCTACCATTTCTTGTCTGCCATCAGGTTTATGGCAT  
GAGCAATGGCATCGGTTTGTGTTGACGCTGATCATTTCCGGAAGTATTTCTTTAATAGTGCATG  
ACTGGCTGAGTCGCAGTACCTCAAAGCATCCGAACGGGTCACGATATGTTTTTCAGACACA  
ATATTCAGCTTCACTTTTACCCATTCAAGCAGCTGTTTAAGTTTAACAACCCCGGTCAAATG  
CCATCTTTATTTACCACGAAAAGGACGTGGGTGTGCGTATGAGCAGCAAAGCCTTTATGGC  
ATATTCAATACCCATATCATCTTTAACCATCCGCTTGTGCGGATATCTTTTACACAGTTCACT  
GACGATAACGTTTTTCAAATCCCTCACCCGTCTATTTTTCTTTTTGTACAGTTATCTCTGCCT  
GGCAATGGGGGCAACAGGATTCTCCCCGTCCAAGCAACCCACCACAAGCAGGGCAATAAAA  
AAGTGACAGCTTGCAAGGCTTTGCAGAAAGGCATGCGTGCTTCAGTTTCAGTAGTAATATCAC  
AATATGGGCAAGCAGCAGGATTTTTACCGGAATTTGAGTGTGTCATATTAACCTCTGGCCTG  
AACTTTGATTTTATAGTCGGCAATAGCGCTGTGCAAGGCTTGTGGCCCCATTTGGGAACAAT  
GGTTACGGTTCTGGGGCAACCCCTTTATTTACGCCTCTACTGCCTTGTTATCAATCTTCATGG  
CTTCTTCAATTGTCTTGTGCGGTAGCCATCAGGCTTACCAAACCTGGATATAGCTACAGCCGCC  
CGCAGCCATAAGTTTTAACTTAACTTCTACCAAACGGTTATCTTTAACCCTTATGTAAAATT  
CAGTAACATCGCCACAAACGGCATTGCCGGCCCTGCCTATCCCATCAGGATTTTCCATTTCA  
CCTGAATTAAGAGGATTAACGAAATATTCCATAACCTTTTCAAAGTACAAAGTCATATCACA  
TCCCCTTTTCCCCGGATACTATTAGGATAACAATAGAAAAACCAAAAAGCAAACTTAACTC  
TTATATAATTTTAAACATACTTTTTAAGCTTAACAGTCAAACCTTAAACCATATCTTGTGTG  
CTATAATATTACAAAATATGCCGAGGAGGCCAAACCATGATGTTTGATTGGTCAAGTGCTGG  
CTGGGGCTGGATGATTTTTGGTGGTATCTTCATGGTCATTTTCTGGTGTGCTATTATCGGAGT  
AATTATCTGGGGCATTATCCACCTTACTAAAAAGGGCAGACTGCACCTTCCGTTTCATCTG  
CAACCAATAAAACCCATTACATGGAAATATTGAAAGAACGCTATGCAAAGGGCGAGATAAC  
CAAGGAAGAATTTGATCAAATGAAAAAGACCTCTTGTCTTAGCCCAAAGCCATGCCTGAA  
ATAACCTGACAGATACTCTGCCCAAGATAATTACAGGTATAAGCGGCATGTCATGTACCAG  
ATGTGCCCGCGGTATAGAAGGCCGTTTGTCAAAAACAGCCGGGTAATAAACCCCAAACCTG  
AATTTGCTCCTCCGGCAAGCTTATATTTAATTATGATCCTTCCATTATCAATCTGGCAGATATC  
AAGTCAATTATCACTGATTTGGGTTATGGCATTATCAGCCGCAAATCCATTTTCCCATAAAA  
GGCCTCCACTGTGCATCCTGTGTAGCCAGGGCAGAAAAAGCTCTGAAGAATACCGTCGGCGT  
AATTAATGCCAGTGTCAATCTGGCTAACCAGACTGCCAGTGTAGAATATCTGGACTCCATTA

CTTTCCGCGAACTCAGCCAGTCTATAAGCAATATGGGTTATGAACTTTTGCCTGAAGAAACG  
CCTCAGGATGAACTTTCCCGGTCAGAAGATGCCGAAACCCGTAAATTGAAACGGGAACCTTC  
CGTCGCTTTGCTACTTGGAAATATGTCTTATGATAACCGGTTTCCTGCCTGCATTCAGCGGTAA  
GGAATTTTTGATGTTCTGCTGGCAACGCCTGTTCACTTTTGGGCAGGTATGCGTTTTTACAG  
GGGGGCATTTCCGCTCTGAAAAATCGCACTACAGATATGAATACCCTTATAGCACTGGGTA  
CTTCCGCAGCCTATCTGTACAGCCTGATAGCTTTGCTATTTCCATCTTTATTTGATTGCCCCCT  
GCTGGAAAAACACCTGTACTTTGACACCTCCGCCATGATTATCGCCCTTATCCTGACCGGGC  
GTTTTTTGGAATCCCGTGCCAGAGGGCGTACCTCTGATGCCATTCGCCGTCTGATAGGTCTGC  
AGCCTAATACTGCCTCAGTTATCAAAGACGGCAAGGAGATTTTGGTAAGCATCAGCCAAGTT  
ATGGCAGGGCGATAAGATTGTTATCCGCCCGGGTGAAAGACTGCCGGTAGACGGACTGATAC  
TGGAGGGTTATTCCAGTCTGGATGAATCTATGATAACCGGCGAAAGTATTCCGTCTGAAAA  
AAGACCGGTGATAATGTCATTGGCGGTACATTCAATCAAACCGGTGCGTTTACATATGAAGC  
CCGAAAAGTTGGGGCAGATACCGCACTTGCCCGTATAATCCGTCTGGTTGAGGAAGCTCAGG  
GTAGCAAAGCCCCTATTCAGCGTCTGGCAGATAAAATAGCCTCGGTCTTTGTGCCTGCGGTT  
ATAGGAATAGCTATATTGACCTTTGTTTTCTGGCTGGCCTTAGGGCCTGAGCCATCTTTACT  
TATGCATTTTTGAACCTGATAGCAGTACTGATTATCGCCTGCCCGTGTGCTTTGGGGCTGGCC  
ACACCTACAGCCCTGATTGTGCGCATGGGAAAAGGGGGCTGAAAACGGGATACTTATTCGCA  
GTGCAGTAGCTCTGGAGAAAATGCATAAGCTGGATACTATTGTACTGGATAAAAACAGGCAC  
CCTTACCCGCGGCAAACCGGTACTGAGCAATCTGGTAAGCCACCGTCTGGATAAAGATGCCT  
TTTTAACTTTGACTGCTTCTGCCGAACAGTTTTCCGAGCACCCGCTGGCCAAAGCTATCTTGA  
AAGAAGCTGTACGCAAAAAAATTGAACTTCAAACCCGTCGGAATTTTCCGCTTTGCCCGGT  
GCAGGATTAAGCTACCATAAACGGCGCCCAAATACTCATTGGCAACGCCAACCTGATGC  
AGTCCAATAATATCACTGGGTGCGTATCAGGCTGAAGCTGATAAACTCTGGGAAGCGGG  
GGAAAGCCTTATTTTCGTAGCTGTAGATGGCAAACCTGAGGGTATTGTGGCCATCAGGGATA  
TTTTGAAACGCGAATCTGCTGCGGTTATTGCCGAACCTGAAAGCAAACAACCTTAATCCGTT  
ATGCTCACAGGTGACAACCACCGGGCAGCCAAACGTATTGCAGATGAGTTGGGCATAAACC  
AATATATAGCTGAGGTCAAACCCGAAGACAAGTCTAATCTGATAAAAGACCTTCAGGCAAA  
AGGTCACCTTTGTAGCGATGGTGGGGGACGGTATCAATGATGCCCTGCACTGGCTAAGGCAG  
ATGTAGGCATAGCCATTGGCACCGGCACCGATATAGCTATGGAAACCGGTGATATCACCTT  
ATTTCAAGGTGATCTTTTCGGCATTACCAAAGCTATTCGTTTGGCAAGGCAACTTTAAATACT  
ATCCGCCAGAACCTTTTCTGGGCGTTCTTCTATAAATATTATTCTGATTCCGGTAGCAGCCGGT  
GTACTCTACCTGTTTTTCAGCCAGAATGGCGTGCCTCAACCCCTGCGGTTCTTTCTGGGGGAA  
TACGGCTTTTTAAACCCATACTGGCGGCTCTGGCCATGGCTATCAGCTCTCTGACCGTAGTC  
GGCAACTCTCTCCGCTTGCGAAGTCTAAACTAAGTAGCTATCCGAAGCAATAATACATACG  
TTATAAGTAGTGATACGTATTGAGACATTTTTGCCTGCGTGCATACTTTTTATATGGATAAT  
GAGCGGGCATAAAAGGAGGTATGATTATGACTCTGGAAAGATGGCAACCCGGTTGGTCACT  
TCGCCCCGCGTCTTTCCGAGAAGTACTCAGTCCCGGCCTCTGGAACATGCTTACTAATG  
AACGTGACTGGCTGCCGGCAACCGAAATGGTAGAACTCAAAGACAAATATCTGATAAAAGC  
AGAAATGCCCAGAAATAACGAAGAGGATATTGAAGTCTCGGTATCTGATAACGTTCTCAGC  
ATAAAAGGTGAAAAAAAATGCGATTGCGAAATATCAGAAGAGAGCTATTATTTCAAGTGAGA  
GGAGTTACGGCAGTTTCTCACGCTCTATGACCCTGCCAATAATACCGACCCTCAGAATATT  
GCTGCCACTCTGGATAATGGCATTCTGGAAATTACCATAACCAAGTCATCTGAGGCCAAACC  
CAAAAAAGTTTCGGTAATCAAGGCCGCCAAACCCAAAAAAACTGACCTTAATACCCAATCC  
ATAAAACCTAAAGCCCAATCCTGACAATGGCTATACACTGCCCGCTCTAAATAATCCAAATA  
GAGAAAGGACTCCAATGGAAAAATCAAAAACCATAGAGCTACTCACAAAAGATATGGAAG  
ATGAGCATGGAGCCATTATCCAATATCTGGGTCATGCATATGCTATCGGCGAAGGTGAGGTA  
GCTTGTGAAATAGAAGCCATTGCCCGTGAAGAAATGCGCCATCTGGACTGGCTTGCAGAAG

CTATCACAGCTTTGGGCGGCGAACTGAGTTTTAAACGCGGCATGATGGATATGACCGGTAAG  
ACTGTATCTGAATGGATGCAGGCTAATGTGGGGCTTGAGAATGGAGCCATTACCCAATACCG  
TGAGCATATAAACTCATTGATGACCCCAAGATTAAGCGCCTGTTAGAACGTATACTCTCAG  
ATGAAGAATCCCATCAGGGTGATTTCAAGCATTTTGTGAAAAACCCTGCGCGAAAAAATG  
GTGGACCGCCGCGGAGATACATCTAATATTACTACTGAAAACCTGAGTTGGGGCATAAAAC  
ACGAATACACTGTTATCATCCAGTATCTGCTTCAATCTTACTCAGCTAAAAACGAAGAAACC  
CGAAAAGAAGCTTCAGGATCAGGCTATAAACGAAATGCAGCACATGGGCTGGCTGTCAGAAA  
AAATGATAGATAAAAAAGGCCACCCCATCTGGAACATGATAAATTTGAAAAAACCCGTGA  
TCATACCAAATGCTCAAGGCAGACATAGAGTTAGAACAAGGTAGCCGATAAATATGAC  
CAATCTGCTGCCCAAACAACGAAAGTGATGTCAAAGAACTTTCCAGAAGCTGGCAACCC  
ACGAACGTTACCACGCTGAAATATTCAAAGACCTTTTGAATAAAAAATATATTACACTTCGG  
AGGAACAGGCTATGTACACTGCACGTGACTATTCTGCCCTGACTGGTATTGAAGGGTTTTCT  
GATACCCTGCTTAAAAACCATTTTACTTTATACCAAGGTTATGTAAACAACACCAACAACT  
TGCGGATACTTTAAAGGCCATGCTTGAGGAAGGTAACAGCTACGCCGGAATATGCTGAG  
CTCAAACGCCGTTTCGGGTTTGAATTTGACGGTATGCGTTTGCACGAATACTATTTTTCTAAC  
CTTGGAATCTGTACCCCTATCAGAAACGGGCAAATTCTACCAAGCACTGGCAGCAGAATT  
CGGTAGTTACCAGCTCTGGGAAGCAGACTTTAAAGCTACCTCCGCTATGCGGGGCATAGGCT  
GGTAATACTCTATAAAGACCCTCAGACCGGACGCCTGTTTAAACCAGTGGATAAACGAGCAT  
GAAGCCGGGCATCTGGCAGGTGCCACCCCGATACTGGTAATAGACGTATTTGAACATGCCTT  
CCTGACAGATTACGGGCTGAAACGAGCAGAATACATTGCTGCCTTTATAAAAAATATAA  
GGTCTGAGGTGGAAAAACGTTTCTGATATAAACTTATTCTTAATATCCCAAAAAACCAAAG  
GGCAGTATTTCTACTGCCCTTTGGCATACACTTCTGGTATATTTTGAAACCCTAAAACGGTTA  
TAAGTTAGTCAACCGGTATATCAGTCATATAGGATTGCACGATAACCGGTTTCAGGAAACCAA  
TAATAGACTGTTGTCCCTACCATAGCTTCGCATAGTATATAAGAATATCCATCTGCATGCCCC  
CATGAAATACAGGCAGATACCAGATATCCGTCTTCCATAGCCGCTTTTTGTACTCTCAGAGC  
AGTAGCATATTGGTCATCAGCGTAACTATATTCAGTTTGTATGGCTGCTTGCCCACAGTTG  
TAGTTTATTAAGAGACTCAAATTTCTAAGCGGATATTTGCCTGAATGGCTGAAAGCTCAT  
CTTCGGTAGTTGCTAATTGCGCTTCAGATCTGTCAACGCTGCTCTTTCATATGATAATTTAGT  
TGGTATATCTAGATTGAGATACTGAATGCATAGGATTTTATAGTTTGTAAATGATATGCGAC  
ACAGGCCGGCTTTATACCTTAAGTTACCATTGTCCTTGGTTTGATTAAGCATAAAACCTTTAA  
CATTGTCATCATCTTTCCAACAAATAGACATCTCTAACCATTCTCTAGAAATTTGGCCATCAA  
GTTGATGGCAAGCCATTATTACCTAACACAATAACTCACAATTGGATTAACTTATACGAAA  
AACAGGATTAATGGCATAAGATTACACGATGCCAGACATACTCATGCCTCACTTATGTTAA  
AGCAAGGTGTCCATCCAAAGATTGTGCAAGAGAGATTAGGTCATTCCAGCATCCAGGTAAC  
ACTTGATACTTACAGCCATGTCACCCCTGGACTTCAATAAGCAACTGCAAATGGTTTTGATA  
AATTAATGGTACCTAAATTATCAGTAGACTATGCAGATCAAATTAATCAGTAAAACAAAGG  
GCATTTTAAATAGAACTCAAGGTACTCTGTACAAATGTAATAATACATAGAGGGACTTTAAA  
GTCCCTCTATGTATTATTACATTGCTGCCTTATAGAGGAGCATAATAAAAAATTATGTCTTCTT  
ATTCTATTGTTTATCCCGGTGCCATGACTCCTGTAAAGATACCGACTACGAATTAGTCGATA  
AACCGTTGCAGATAAAATCATTGCTAATCCAATAATTATTCCACCAAACCCCATGCAGATT  
TATATTCTCCTTCAACAGCGACAGAACCCAGATATGGCCAATAGCGAATAAACTAGAGA  
CAATATCACGGCCATTATCAGCCATTCCCACCATTTTATCACGATCTTTCGATTGTGTAAGAA  
CAAATAAAATAAGGTCAAGCCTATACCTAAGATAAACTTATCAGAGCGAAAAACTGAACA  
TCTGACATTCTTAAATTATCCTTTCACCTATTTATTATCGTTAGTCCAAAACGGAGTATTACC  
AAGGCTTGTGTGATTGATTCCACCAATCGTTTAAATCATCTTTCATACCATATCCAAATGTAT  
GTTCCATTTGGCGGAAAAATGAATTA AAAACCGGTGTAGCTGCAACTGTGGATCTGACTACG  
TTATGAATCAAAGAACCATTAGTCATGTTAAAAAATGGGCAATAGGTCTCACAGTTTGTACA

AAGAACACATCTACCCAGTTAAGTCGATAACCAAGATAAACCAGGGGTATTATCCCACCGAT  
TATTACTCCATTGTGGAGGACCTACCTGGATAGCATTGAGGGACAAACTGTTGTACAAATG  
CCACACGTTTTACAGAATTTGTGTATGCCAGCATCAATTGGCTTGGTCGGAACCATGGGCAA  
ATCACAACTAATCGATTAGAGCCCTTAGTTGCCGAACCGTATTTGGGGCTGATTTATTAG  
CAACACGACCTTGTTCGGAAAGACCACTCATAACTCCAAAAGCACCACCAGGTCCCCACATA  
GCCACGTCGCCACCAAGTCCTTGATAGCCAAGTGCTTTTAAAAAAGTCTGAACTCGGCCTCC  
ATTTAAAGCCATCTGAGGATAGGCAATCATACTTGAAGCGTCAAGTGACCACCCTAGAGAA  
CGTTTTAAACGATCTTCTGGTAAAGGCATTGTCATTGTTAATACCCAGTTAGCCTTATTGGGT  
ATTACAATTTTCTGGTCATTATAATACCCTTTATCGACTTCCTCCAGACTATTGGAACAGGT  
GTCTTTGGCAGCGGGACATCAAACCTGCACATTTCCCGTTCCCCCAAATACACCGGGATCTCC  
AGCCATAAATTGGAAAGGTATTTGCTTTTCAAAAAAAGCTTCTTTGTATTGCTGGTGATTG  
GCATTACACCTATACTGGAGTAACCAAAAAATTGACAAACAGTTTCGCATCATCAACGTATTT  
TCTTCAGGAGTTCCTTCCCACCTTGGGTATTTCCCTCCCCAGACTGCTGCCGGTGGTTGATTG  
AAATAACCCCAACCACCAGTAGACCCGTCAAGACGCATTGTGGACATCATTTGCTGGGTACC  
AGGAATTCTATACCTACCGATACCACCTGTACTTGAGGCAAACCATAAAGCTTCGTCCCTTG  
TTGGCCCATGGCCATTAATTCCTGGTTCCAGTCAGGAAATTGCTGTTTTGCCACGCTAAAT  
AAAGATCTCTCTTTTCTGGTAGAGTAAGACACTGGTCCGCGGGATCAGGATACCTTTTATCA  
TCTCCATTTTCAGGTACAGGTCCCCAATAGGCTCCCTGATGATTGTAACCGTCATTACGCGCA  
AGTATAGACCAATCTATATCAATGGTAGGATTTTCAAATCCCTTTCTTTCACATACCAAGG  
AAAATTATTAAGAGATTTACCCGACAAAGAACTGGTTTCGGCACTAGCAGCAGAAATTA  
CATCCAAGTCGTGAAAATTCGGCATAACTGAAGTCGCGGCACCTATCCCTGCTCCCGCTAAC  
CCCAATCCCTTCATAAAATCTCGCCTACTTATCGTACAATGGAAATTATGCATATTCCCCTCT  
TTTTTAATTCATATTTGGCGATTTTCCGGTCTCTCCCGAATGTCATCCTCATTTCAAACTCCTT  
TTTATTCAACTATTCTGCAGAATACATTTGCATAGCCAAAAGTTAGCAGGTGAGTACTACCA  
GAGAAATTATTATTTTATTGTCATCACTCGAAGGATAATAAGTTAATCTTCTTATGTACGCCA  
TAGGCTCGAAGTTTATCATTTGCCTCGCTTTGTTATTCCCCTTCACTTCAATAATTAGCATAGT  
GTAAAAACAGCAAGACACTCTAAAAATAATCCCCAAAAACAAAAATTGAACTTGTCTTAA  
CAAAATACATTTAACATCTATTATGATGATTGTACTTCGTCATGTACGGTCATACTAGAGGAT  
TTCATCTTAATGGATAATCCAAATATTTCTGATGATTTGTCAGATTAATTTTAGATATTTAA  
GGAATTTTTCCGTCATGGAATATTGCACGTATATAGTAATATAATATAGATATGAACATCGC  
GAATGAAGCGAAAAGCAATAACGTGCCCTTTAGTTTCAATACTAATTTATATAAAGCGTTAT  
TCGAATATACTCAAACAGCTACTGTAGTTGCTATTGATACATTGATACTACTTGTCAATGAA  
AAATTCTGTGATTTGACTGGCTACTCAAATTTGGAAGTAGAAGGCAAATGCATTGGACCAA  
ACTTATGGGACAATTTATAACAAAACGTGCATTAGATGTTTATTATAAATTTAGTAATTCAG  
AGTCTTCTAGTTTTTATGTCCCAGAAAGCTCCCTTTTAGCTAAAGACGGACACACATTATATG  
TCATGGTATTCATAAAAAAGCTACCCGGTACTCAATACCGCATCTATTCACTTACAGATATTT  
CACACTTACGAGACATTGAGTTGGCTCTAAGAGAATCAAATAAACGGCTTAAGGAATTGTCA  
AATCATCTAGTCCAAGCCAGAGAATTGGAGAGAAAAGCTCTCGCCCAAGAGATTCATGACC  
AACTAGGTCAAGCACTGACTGGCTTCAATATTGACGTCTCTTTGATTATCAAAGATCAAAA  
AACTTAGATCCCGAAATTTATAAAAGCGCAATGTGCCTAAGTGAAAAAATCCAATTA  
ACTATTCAGGATGTTAAACGAATTGCGACCGAACTTAGATCTCAAATTCATAGATGACATGGGATTGG  
TGGCTTCTTGAATGGCTCTCAGAAGATTTTCAAAGAAGAACCGGCATCAAATGCTGGACA  
GAAATTCACCCAAAAGACCTTAAAACAGATCCTATTTTATCTGTTAATCTTTTTTCGAATTTGC  
CAAGAAGCACTAACTAATATTATCCGCCACTCTCATGCTACAACGTAGTCATAAGATTATA  
TATGACACCTGATCAATTGATATTTCAAATAAAGGACAATGGGATCGGGATAAATATGAAA  
CTGATCGATAAAAAATGATTCATTCGGTATTTTAGGAATAAAAGAAAGAGTTTGTATGCTTGG  
CGGTAGACTGAAGATAAAAGGTGTCCTCAATGTAGGCACAAGTATAGTTATTCTTCTACCCC

TGCCAAGGATAATAAATAATGTATAACATTCTAATTGTAGATGACCATCCGATCGTCCGAGC  
AGGAATGAAATCAATCCTTAATGCGGAAAAAGGAATGCTTACTCTAGATGAAGCCCAAAC  
GCAAGGGAGACTATGTTGAAGGTTTCGTCTAATAATTATGATTTAATTCTGCTTGACCTAAC  
ATTACCAGATAACCAAGGGCTAAATCTACTGAAAGACATTAACAATTAACAAACAAACT  
CCAATTTTGATTTTAAGCGTTCACCCCGAGGAACAATATGGTATCAGATGTTTAAAGCTGG  
GGCATCGGGATTTATATCTAAAGAAAGCGCCCCGTTTGAACCTATAAAAGCTATTCGTAAAA  
TTCAAGCCGGAGGTAGATATATAAGCCCAACACTTGCAGAGATAATGGCTACTCAAATCTTT  
GATAAGGATGGACCTCGACACCTTCGTTTATCAGACCGGGAATTTCGATATTTTTATAGGTAT  
AGCCCAAGGACTTAAAGTTACTGAATTGGCCGAGAAATTTAAGCTATCACCCAAAACGATTT  
ATACATATAGAGAGCATGTCTTTACTAAAATGGGGTTCAATTCAAATGTTGAATTAGCACGT  
TATGCTAATTCCAATGATCTAATCGTCTAATCAAATGTATTGTTATGTATCTATGGAAATTAG  
ACCAATCCTTCTATTCTAATTTAAAAATTAAGGTTATCTATTTTAAAGCTACTTTCTCTTGAT  
ATCCTCGTTATGGCAATTATTTGTTATTAACCTATTAGCAACAACAAAAAGCCCCAGG  
CTTCTTACTGCCTGGGGCTTATATTTAGCTTCATATATGGCGCGCCTAGAGGGATTTCGAACCC  
ACGACCCTCGGTTCCGAAGTCGCCTAAACGGCATAAAAATATAGTGCTTTTAAACGTAATATA  
GAACACTTGTCTTATCCTATACTATAAAAACCAAAGCTAAAGTTAGCATATAGAATATGTT  
GCCAAGTAATGGTTATTAGCAGTTTATTAGCAAATTATTAGCAGAATTATTTTCGCTTGTATT  
CTGGATTACTGATCTCATCAAACCTTAGCAGCTCCTTTTTTAATATGATAACCCAAATACTAGT  
ATTCGCGCAATCCGTAAATACACTAAAAGGGATAAAAATATTGGAAGTAGCAGACGTTGTCAT  
AAAATACTGATTGTTCTTTTGCGGGGCCGTAAATGACAGAATTAACCCCTAAGACGACGGGC  
AAGGTGCTTAAGACGTTACCAACATCTTGCATTTCTTCGCCTAAGGTCATCTTATCATCATC  
TTCCGTTAAGTTTGAATCAAATACAAAATAAAAACCTACTACTGTTAATACAGCGGCGATTA  
TCACAACATGCTCAAGAACAAAGTTCCAAAAACCTCACCCTGCGATTAGCGATAAAAAT  
CGTAGAGGCAGCCAATAATATGCCAGCAAGAATAGTTGCAAGTGACAAATGAATACGCTTT  
GTTAAAGCCAGAATAACCGGAATAGCGATAGCAAGGATATAAAGGGCAATCCACCACCACA  
GCATTTTATTACCCTCCCGCTAGAGTTTTCTGGATTATCCGCCAAGAGGAATAGTTAAGCAAT  
AAGTTTTGTATAATCGTTGAACTTCTGCTGCGGTTACAGGAATGGATGCCCCGTCAGCCAATT  
GGGATTCATCCACATTCTTGTGGATAGCCAGACTTTC AAGGGCTTCTTCTGGAGTGTCTC  
CATCGCCTATGCAACCTGTTAATTCTAAGGCTCTGGCAACATAGTAAGTCCCGCCGTCATTAT  
CTTCGTCTGGTTCAATGACTACTGTATATGGCAATCCCATGTAGTAGTCCAAGTTCTTTGAGA  
TTGTTTCCATAAATTAAGCCTTACGCTCAGACAGTTTATGCACCATGTACGTATTCAGGCTGA  
CGTTATTCTGCTCAGCTGCCCTGTCAAGTTTGGCATGAAGCTCTTTGGGCATACGCACCACAA  
ACCGCCCGCTATACTCCCGCTCGGTTCTGGGAAGCGGAATATCCTGCCCATCTTCATAAGCG  
GTTTCTATCCAGAGTTGACGGGCCTCCTGAATATTGGCAAGTGCTTCTTCTGAAGTATCACCC  
TCAGAGAGACAACCAGGAAGTTCTTCAATTTCAACTACATACCCGCCCACTTTTGAGGGAAAT  
AAGTTTAATTGGGTATTCCAGACCAAGGTAATATTCTAGTGGTTGACGTCTAGTTTTAATAGC  
ATTTGGCATTCTTAACTCCTATCCAAGCTGGGGATTATTCCCCAGCTTTAGCATCTTTGTC  
ATTCGTTCTACGTATTCAGGTCTAACATACTTTGATGACTTAGGGCTTATTATCGTGATTGGC  
ATTGAATTTGCTTTGTGATAAACCTTGTGACTTCCTGCTGACCTTCTCAGTTCGTAGCCAGAA  
GCGATAAGAAGTTTATCACAATCAGCTTCAGTTACTTTGTTTGGGTTAGCCTTTATCTGGTTT  
ATCAGTTTCTATACTCATCGCTCAGTCCTAATTTCTTATACTTAGATGATACTATATTTAGT  
ATCATATGTCAATACTCAAGGCAAAAATATTTTACTCCGGGGGCGGATATGCCCAACAAGAA  
ACTAACAGTCAAGCAAGAGAAATTCGCAGTTACTTACTTCAAACCTTGGCAATGCTACTGAAG  
CAGCAATAAAGGCCGGTTATTCATCCAAGACTGCTGCCGTAATAGCTACGGAAAACCTAAA  
AAAACCTAATATCTTGGAACGCCTTGAAGAACTGCAGGCTAAGGTCGCTGCGGATGCCGTCA  
TGAGCGTTCAGGAGCGTAAGGAGAGGCTGTCCGAAATAGCCAGAGCAAGACTATCTGATTT  
GGTTTCGTGCGGGCCGGACGGCTCTTGGATAAATGTTGGTATAGATGGATGCCAGAGCGCGG

CCATCCTATCAATTAATCCTCTACCGAGTATGACAAGGACGGAGACCACCCTACTGTCATT  
ACAGATATTAACCTCCATGACCCGGTTCGGGCTATCGCCGAGCTAAACAAGATGGAGCATAT  
CTACGAAACCGGAACATTACTCAACATAGATGCACGCAGCATAAATCTAAATGTTGAAAGTT  
ACACAGATGACGAACTCATCAGAATTATCAAAGAAGGTGAAGGCAGCACGAGAATTACTAA  
GAAGGCGCCAGGCCCGAAGTAATCTTCTGGATTTTACCCGGTACACTTATCCAGACTACCAG  
GCTAACTGGCATCATATTGAGTTATGCCAATATCTGGATAAATTTATTTTCAGGTGAAATAAA  
ACGGCTCATGGTGTTCATGCCGCCTCAAACGGCAAGTCTGAACTTGTATCACGGCGTCTGC  
CGGCTTTCATTCTGGGCAAATTCCCGGATGATTCAATAATAGCCACCAGTTACGGGGCTGAC  
CTTGCTTCTATGATGAACCGAGATGTGCAGCGGATTATTGACGGAGACCAGTATCCAGTTTT  
GTTCCAGATACTAAGCTCTTCGGTGAAAATGTCAGGACAGTATCTCAAGGGGCATACCTGC  
GCAACTCAGACATCTTTGAAGTAGTTGGGCATAAAGGCTACTACAAAAGTGCCGGCATCGGT  
GGGTCTATTACAGGTATAGGCTGCATCTGGGGAATAATAGATGACCCTATTAAGAACCGGGC  
AGAAGCTGAATCTATAACCTATCGCAATTCATATGGGACTGGTACACCTCAACTTTCCAGA  
CACGTCTCCGCAAGGATGCCAGAATCCTTTTAACCATGACACGCTGGCACGAAGATGATTTG  
GCCGGGCGGCTGCTTAAGCTGGCAAATCAGACCCCGCAGCCGAACAATGGACGGTAGTTT  
GTTTCCCCGCTATTGCAGATGGGCAGCTAATGGACTGTGACCCAAGAAAAGCAGGTGAACCT  
CTTTGGCCAGAACGCTACTCATTAGAAACACTGCTGAAAACCTAAGGCTACTTCAGGCGGTTA  
TGGCTGGGAATCTCTTTACCAGCAACGGCCATCATCACCGTCAGGCAATATTTTAAACCGTT  
CCTGGTGAAAATATTATCGGCAACCACCTTCAAATTTGATTTCAGTTATTCAATCTTGGGACT  
GCTCGTTCAAAGATTCCGCCGGCACCGACTTTGTGGTTGGCCAAGTCTGGGGCAAGGCGGGA  
GCTGATAAATACCTGTTAGACCAGGTAAGGGCCAGAATGGATTTCCCGGCTTCTATTGCCTC  
TATATTAGCCTTGTGAGCCAAGTGGCCAAAGGCAACTGTGAAACTGATAGAAGATAAAGCC  
AATGGCCCAGCCATTATATCCACCCTGAAACACCGAATAGCCGGGTTAATCCCAATTGAACC  
GGCAGGCGGCAAATAGTCCGGGCACAAGCGGCCAGCCCGGATATCGAAGCCGGCAATGTT  
TACCTGCCTGAAAACACCAGCTGGGTCAACGACTTTGTTGAAGAGTGCGCCAATTTTCCAAA  
CGGAGCACATGATGACCAAGTGGACGCTATGAGCCAAGCAATAAACTACCTGAATAACTGC  
AACACCTATTTTGTGATGTGGGTTAAACGGAGCGAGTATGTTAGACAAAATCCGAAACAAAAT  
AGCACTATCCATGCTGGATAAGAAGAGCTTTGATTTAACATCGCCGGAATTTGTGCGGCTTCT  
TCCAGGGGCTATATTCCATGTTTTTCTTGCCTGGCCAGACCAGTCTACACTGACATACCTGCCT  
CAAAAGCCATCAGGGAAGGCTATAAAATGGCTATACCCATCTATCGGGGTATCAGGTCATTG  
ATTCAAGCGGTCTCCGGCATAACCATGGATTGTACTGGATAAAAAAGGCGAGCAGATACCTG  
ACCATCCTTTTGTCCATGCATGGAATTATCCCAATCCTGAATTTTCCGGCCAGGACAATATGG  
AATACATTGTGCGCCACTTGATGCTAATCGGTAATGCTTATATCCGCCCAGATATATGTCAACC  
AGCAGCCTCGCGAGTTCTGGATGGAAATGCCCGACCAATAACAGCCTATTCCTTCCAGAGAC  
CGTAATAAATGGCTGGAAGGCTGGCAATATACGGACGAATCAGGTGTCAAACATACAGTAG  
CCAAAGAGACCTTTATTTCAGTTTAAGCAGATAGACCCAGGTAATTTCTATAACCGGTATGGGG  
GCTATCATGCCAGCTGGACGGGTTATTGATATCTACAACGAGGGGCTGGATAACCCAAAAGGT  
ATCTATGCAGAACCGGGGTATGCCGTCAGGTCATCTCTTCCCGGAAGAACCCTTGACCCCTG  
AACAAATTTGACGACTTCAAACGCAAATTTCCAAGAGAGTTATCTGGACAAATCGTCTCGGAGA  
ATGCCCTGGCTTTATCCCCGCAAGATGAACTGGATAGAAGCGAATATGACTCCGATAGAGCT  
GGATTACAACAATTCGCTCTGGACTAACATAAGACAGCTGGCTGCCGCCATTGGTCTTGACC  
CCTGGTGGTTGGGAGACCGCGAGCATTCTCTTTTAATAATGTGCAAGAGGCCCGTAGGTCT  
CTATATGAGGACAATGCTATCCCCATGCTGGATGATATCAAATCCACTCTCAATCTCAAGGT  
GGCTCCGCTGTATGGCGGAGATATCAAATTTGCCTATGACGTATCTAATGTTACAGCTCTCA  
GGGAAGACTTCAGCAAGAAGAGTGAACAGGCTGCAAGGTTATGGAGCATGGGTGTCCCCTT  
AAAGCAAATAAATAAGATTTTGGAACTGGGCATTGATGAATTTCCAGGTTGGGGAAGGTCA  
TATTTACCATTTCAGCGTAGCCCCGGTTATGGAAAGCGGGCTACCTGAAATAGTGGACGAGCC

AGAGACCACCGGGGCTAAGTCACTTCACATGGACATGACAGAGGAACAAAAGGTAGCCGAA  
TGGAAGCGCATAGATTCCC GCCGATTGGCTGGTGGGGTGTACTGGAAAAACGATTCGAGC  
CTCTATATAACCAAATTGGGCAGCGCCGTAGCCAAAAACCCGATAGCCTTGATGATGTTTTTC  
AAGAGCCTGTCCCCGAATGGGAAAAGACTTTAACCGCTATTACCCTTACCCTGATAGAAGA  
TTTCGGCAAACAGACCGCTGACCGATTA AAAACCAATAATCAGTTACTGGAATTC AAATTTG  
ACCCATTCTCAGCGGCAATTAAGCTTGGGCTACTGCTCACGCTGCCGAATCAGTTAAACT  
ATCATGGAGACCCAGCAGTCCGCCATGCACGACCTTATAACCTATGGGATAAGCAATAACCT  
CTCCAACACCCAAATAGCCAAGTCAATCAAGCAATTTTATACAGACAACGCCCGCAGTCTGG  
CAATGCGAGTTGCTCGGACTGAAACAGCTATTGCAGCCGGATATGGTCAATCGGCTGCAGGC  
AAACAATCAGGGGCTAATAAGCGCCGCTGGCTATCAAGTCGGGATGATAGAGTCCGGGATG  
CTCATGTTGCTTTAGATGGGCAGACAGTGGGCATTGATGAGCAATATTCCAATGGTATGGCC  
CATGTGGGTGACCCGGCTGGCGGGCCGAAAATATTATCAACTGCCGATGCGTGGAACAAT  
TTTTTAAGGAGTAAAACAGGTGGAAAAGAAAACTTCCGATTTCAAATGAAGGAGTTTGAC  
GAACAAACAGGAAATTTGAGGGAATAGCCTCAGCCTATCGTAAGTCTCCCGATAAGGTCA  
AAGATATTGTGGAACCGGGGTCTTTTACCAAACCAATTCAGGAAAACAACAACGGAGTTAT  
GCTCACCTTTCTCCGCATGATACTGATTCACCGATTGGTATTGGCCCGATTACCGATAGTAC  
GGACGGTATCGTAGTTAAAGGGCAAATCCTTAGAGGTATCCAAAAGGGCGAAGAGGCTTAC  
CTGCTCATGAAAGCCGGGGTAATCAGGACGCTGTCTATAGGATACGAAGCCATCAAATGGG  
AAATTA AAAACGGCATCCGGCATCTGCAGGAAATAAACTATATGAGATAGGGTTAGTACC  
GGGGAATTTGCGCCGAGATGATATGGCAGTAATACACAATGTTAAGGCGATGACCTTTGCAG  
AAGCCTTAACAAACGAAGAGCTTATAAGCAAACCTCTGGCGCATATTTAGCACGATGGAAAA  
CGTAATCATGGGAATTATGCGCGATGAAGAGGAAACCGATAAAGTCAACTCTCTGCGTCAA  
GCTGTTGATGAATTTTCGGGTACCTTTAATAACTGGATAGACGCAATGGAGAGTAACGGCGC  
TTTCAAATCGGCTCTTGCCATACTCGCAAGAAAATCAGGCCGGATATTGAGCGCCCGAAATA  
AAGAAGCAGTCCAACACGCTACGGATGTCCTATTAGCACTTCTGGCCGAAACTGAAGACGA  
AGCGGAGCCGGGTAAAACCACTCCCCGCCGGACGAATCAAAGGAAGCCGCACAGATAGAC  
GCTATCCGGGCTAAATTATGGGGATTTGATGCTAAAACAGCTGATTTCCGAATAGACGAAAT  
TACAAAACGAATAGGAGTACAAACACATGTCTGAAGGAAAACAGGAAGTAAAAACCGAGG  
ATATTCTTGCTAAGGTAAATGGCCTAGCCGATGACCTTCTGAATTGGAGAGAGCGGGCTGAC  
CAGGACATCAAAGCCGCCGGCGAAATATCCAAAGAAACCAAGTCAACAATTGCCACTTTGG  
AAAAGAACTTGATGACCTGCACGTACGGGTTGAAAAGAGCGAGACACCCGTTAGGACTTCA  
TCCGTCCACACCCGGTAAGAGCATTGGACGCCAGTTCATCGAGTCCAAGCCTACAAAGATA  
TGATCCAGTCAGGGA ACTATGAATCTTCCCGTTTTGAGGTCAAAGAAATCATTTCAGCAAC  
CTTTCCTCAGCGGGT GACTTGATAGTGCCTGAGCGTGTACCCGGCATAGTAGCCGCACCTGA  
ACAGGCTCTCCGAATCAGAAACCTACTCGCTCCCGGCAACACCACCTCTAACGCCATAGAAT  
ACATTGAAGAGACACTCTTACCAATGCAGCTGCAGCGGTAGCCGAAAGCGTTCAGGGGTC  
TGTCGTTAACAAACCTGAATCTACCCTGCGCTTTGACAAGAAAGTTGCCAGCGTTGGCACAT  
ATGCGCACTGGATTCTGCTTCCCGCCAGGTCATAGCTGATGCTCCCCAGCTCCAGAGCTAT  
ATCAACGAGCGCCTCACTTATGGGCTTAAGTTGGTAGAGGATGGCGTTTTGGCTGATGCTTT  
GATTGATGCAGCCACTGCCTACGACGAACTCTGGAGACTGCACTGGGCGTTGAAGCCATA  
ACTCGGATAGACAAAATCAGAGTGGCCATTCTGCAGGCCCGGCAGGCTCAGTACCCCGTCTC  
CGGCATTGTCATTAACCCGGTTGATTGGGCAGCTATGGAATTGCTGAAAGACACTCAGGAAC  
GCTACATCTGGGTATCAGTTGTTGATGGCGGAACTGCCCGTCTGTGGCGCGTACCTGTTGTTG  
AAAGTGATGCCATAGAAGCGGGTACATTCCTGACCGGCGCATTCCGTCTGGGCGCTCAAATT  
TGGGACAGGGAAGGCGTTAGCGTCCGGGTATCCGAACACCATGCGTCTTATTTCAATCAAAA  
CACGGTTGCTATCTTGTTGAAGAACGCTTCGGGTTGACCATCTATCGGCCTCAGGCTTTCGT  
TTACGGCTCATTAGCTCCGGCAGCTAGACCAGTCTTTAGGCCAACAAATTAAGCTACGGG



GGGGCATTCTGCCCCCGTACAGTATGAGGTGATATGAAATGGTGGTAGTAACTCTTAG  
CCGGCGGACAAACAAGATAACACCTGTTCAAACGTCAGTAGTACGCCAATACAATTGTCC  
AGACCGGACTATAAACACCCTGATAATATAAATCCAAACCAGCGGGTGGTTATCATGGCAG  
CGGGTGTCTGCCGTAGATGGAACAATTATCTGGGTATGCCAAAGCAATTGGCTCCCGTAAAC  
GGTGAACCCATTATCAAACGGACTATCCGTCTCCTTAAAGAACGCGGTATAAGCGATATCTG  
GGTTACTGTCCGAACGGCTGGCCAGTATGGAGATTTAGGGGTCAGAGAGTACATCAATTTGG  
AACATAACCAGTACTCAATAGACCGTATTTACGGGGCACGTGAATTATCACCAGCCATATAT  
CTGTATGGCGATGTCCATTACACAGAACCGGCTATTGATACCATTCTGACCGATACTAATGA  
TTTCAGGTTCTTCGGCCGGAGACATGCCGGCATCATCAAAAATAACAGGGAAATTTACGCTA  
TTAAAGCTAATAGCTTCATCATAAAAAGGCAGAGGAATTAAGGGAAATGCACGCCAGCCA  
CCAGGTACTTAATTCATTGGCGGGCATCTACTTATTCATTGTCTGGGTATACCGATTAATAA  
ACGCACCAAAGACCACACAGCAGACGATGCCAATTAACACCCATGCTGACCGATATAGAT  
GATGAGACCACCGACTTTGATTATCCCGGTGAGTATATCAAATTTCTAAAGATACTTAAGCA  
GCCGGCACTCGTACCTATCAAAAAGACAATTACACCTCAGTATATTAACCAAACCTGTCA  
GGAATTATTACACCATTGACCGTTTGACACATGACCTCATCCACGAATTCTTACCCAAAATA  
CCAGACGTAGATTTAATAGTGGGCATACCCAGAGACGGGATGCTAATAGCTTATCTGGTATC  
AATATATCGCAACATCCCTTTTACCGACCTGGATAGTTTCATATCAGGGCATATTTACCAATC  
CGGCATCAAACACCGCAAGGAGAAGACCGATATAAAGCGGGTTCTGGTTGTAGATGATATC  
TGTGCCTCCGGCAATGCCATGAAGGATGCTAAATCCCGAATTCCTCCGGCGACTATCAGCT  
GTGTTATGGCGCAGTATATGTATCAAACCGGATGAGAACTAAGGGTCGGCATTATTGACT  
GTTACGGATGTGAACTGATTGGCCCTCGTCATTACCAGTGGACTCATTGCGATGCCGTCCAC  
TTACCCGGCACCATGATGGATATAGACGGGATTCTATGCCCAAATTGGGACGGTGAGGATG  
ATAACATCCAATCATATGTGGATTGGCTTCAGACTGTCCCTCTCAAATCAAACCTCAGAAC  
ATAGGCACATTGATTACCTGGCGGAGGGAAGAACATAGAGCTATAACCGAAGCATGGCTGG  
CCATACACGGGATTTCTTACGGTCAGCTGATTATGTGTAATCGTAACCAATGGGCCAACGCT  
GCAGAATTTAAAGCATCGTTCTATGGAAAAAGTGATGCCCGGTTATTCATTGAGAGTTCCGGC  
CAAGCAAGCTGAGAGGATTTATCAAATCAACCAAAGACCAGTTGTAGCCTTTGATACTAACG  
AAGCATGGGGGTTAGACGAATGAAAATCAGAATTCCTAAACCATTGAAACTACTAAGGGC  
AGGCTAATTAAGGGCAATGTAATAGATATCACGCCGGCGGTAGCCCAACGCTGGATTACAC  
AAGGTGACGCAGAGCCAATCAGAGAACCTGTTAAGAACTTTCTCCTGAGAATAAGGTTATT  
ACTCCCCCTGAAAATAAACCCACCCGGCGCCAAGCCAGAAGGGCACGAAAATGAGCCTATC  
TGAATATGCGATTGTAACCCTTGAAGAAGCCAAAAACTTCTTGACGTTGATGGGGATGATG  
ATGACTTAACTTTAGAGTTTCTGATTGAACTGCTACTGCAAAAACCGAGGACTACTGCAGT  
TCCTGTTGGGTCAAACGGGGTATAACCGAAACTCACATTGGGAATGGCAAACAAGCTATCA  
ACCTATATCGGTTACCTGTAGAAAGCGTTGAGGCCGTTATTGTAGATGGGGTGGAACTTGAA  
GAATCCGACTATATCGCCAACTCTCTATCGGGCGTTAACAGGCCGGATATGGCAGAAAGA  
CTCTGTTATTGAAATTGCGTATACAGCAGGATATGCCGATTCTTACGGGCAGGCAGCTATAC  
CGTATGCGGCTAAATTGGCAGTCCTTAATGCCTTGGCAGCCTGGTGGAAATAACCGAATGGGA  
GTAACCAGTGAAAGCATCGCCGGCATTGGGTTCGGTAGCATATACCGGCCGAAGAGGAATTGC  
CGGAAAACGCCAAGGCTAAGCTCTCATCGCTCAGGAAGCGAATATTATGATAACCAATTTTA  
TTAAGACCAAATGCACTATCCAGAATAAATCTTCAACCACAGGGGCTATGGGCGAAACTGA  
AGCCTGGGTAAATGGTGAGACACGTTGGTGCAGGCGTATATCCGTTGACGTGATAACCCGA  
ACGGCCTTTATGCAAAAATAATACCATCGTGACTGATAAGTTTCTCTTTGATGGCATAAGTTACG  
CTCTCTCTGGGCAAACAAGAATATGCTACCAGGGCGTTATCTATGAGTTGGCAGAGTCAGC  
CCAATACGTTGAAGGAAAGACTATTGTCATGACTAAGCGAGGTGGCTAATGGGTGTTGACAT  
CGCCTTTCGTGAGGATATATCCGGCGTCATAAACAAGATAGACGAAACCGCAAGGGAAAGA  
ATGTGGGAAGCGGCAAACCTCGTCAGAAACACAACGCTTGAACCTCTCAGGGCCGCGTT

CCGGTAAGGAATACTATGTACCCGGCACTAAAACGAAATACAACGCATCAACTGAAGATGA  
ATACCCCGCAGCCGCCACCGGCCAATTAAGGCAGTCTCTTAAAGCCTCTGTCGAGGTTGACG  
GGAAACAGGTTCGCGAAAGTATGGCGAGAGCATGGGTCAAATGTAGATAGCAAATAGAAC  
CCACCTCAGGTTTCAGGTAAAAACATAATCGGGTATGTTGGAAGTGGAGGTAGTGTATGGCCCC  
ATGCTGGAATTCGGAACATCCAAAATGAAGGCCCGTCCATGGCTTAAGCGTTTCGTTTGATTC  
AGTCTCAGAAGGTGTCAAAGATATTTTTATGCGAGTGTGGTTTTGATGGATACCCAAGCGGC  
ATTAATCTCAAAGTATATGAGACTCTGACAGAAGATAGCCAGCTGGCAACCATCATGGAC  
ACTATCAGAGTACATCCGATAACCGCCCCTGCTGATACGCCGAAGCCCTATATAGTCCATGA  
GCTCTCACTTCGGGAGACAGACAAACCCTTTCCCTTCTGCACAGGCGGGCTGACAATCCATT  
TGTGGGATACAGGCAGTAATATCACCCGAATCCTAAGTATGCGTTCGCGCATCATAGCCTTG  
TTCGACCAACTACTCTATAACGATGAAGACATATCGGGAGCCAGATTTAATCTGCAGGCAGA  
TAACTTCGTCAGTATGAGCCGGGTATTTATCATTATGTAATCTTGTGTTGATATCCGTCTTTTT  
AAAGCATCTGAAGCAGAATCAATACTGGAGAGAGAAGGGTTCATGGGATAGCAAATCGAGG  
CATATTTACTTTTTCCAAAATATTAGGAGGATAAAAATGAAAAGCGGATTAACCACGGAAACA  
AAAGAGAACATTGTCTTTGGCCCTGGTGAAGTACTCTTAAATTACAACGAGGACACCGGGGT  
AGGAACTCCTGTAGGAGCAACCAGAGGCGGGGGTGGAGTTAATTTAAACCGTACCTTGCGC  
CAGATTACGGTTGACGGGCAGCGCGGGCCGTGGAAGGGCAGCCAGATAATGGATAATGTAG  
CCCCGACCCTGACAGTTAGAATGCTGGAAATTACCAAGTCCAATCTGCTGGCCGCTATCGCC  
GGAGCTGTTGAAGATGCAGACGGCAACATCGTTGGCGGAGATGTAGCAGATGCTTCCTATCT  
GGACAACGTCACAATTGTGGGTGAAGATGCTAACGGGAATGACTTTATATTCATACTGTACA  
ACGCTTTGCCCATCTCAATAAATGCTTTTACTCTACCTGATAAAGGCGGAGATAGTTTCAGAA  
GTGGTTTTTCAGTGGCCACTTTGACCCCACTGACCCGGACTCTGAGCCGTGAAAATCATTCC  
TGTACCGGCAGGTAGTTAACAATGGCCACACAGGAACTGCAGGTACGAGAATTACAGATCA  
ATGACCTCTTCTCCCTGGCCGAAATCATACTAAAGGCCGGGGAGAAGACTAAGAAACAGAT  
CTCCGAGGCAATACAGGCCACCAAAGGCCAAGGTGAAAAAGACACCGAACACCTTGGGCTG  
ACAATAATCGGAGTATTACTGGTAGACTGTAAGGACGATATCAAAGCCTGGTGTGGCTCGGT  
TTGTGGTATAAGCCCGAACGAGTTTGGTCAAGCCAGCTTAAAAGACCTTGCGGCATTTATCC  
GGGGGCTGAAAGACCAAGAAGGATTTAAAAGTTTTTTAGCCGAGTTGCGGGGAATAATCCC  
CGCCAGGTTATTTCGGCTAAAAGAACAGATAATGGACTCTCTCCAATCCAGATACCACCGGCC  
TATCGCTGAGTGCCTGATGATGTCTTGTACACGCCTGAGCGTAATACAAGACATGGAAACAC  
GAGAATTCGGGAGAAGCTCGTTACCAGTGCGTTTACGGCATTTCAACTTGGTGC CGGGC  
GACAAGCCATTTCTGGAATATCTGTCCGCTATTGGACTCGCAGATAAAAACCGCCGCGCAACA  
GGTTAAAGCAAAACCAACTACTGCCGATATCCTGAAAAAGTCCCAAATATAACGGGAACGG  
GCGGTAAAACAGAGAATGAAGGATAAAAATTGCTTGACATCTCTTAGCTGGGGTATATCGTA  
AAATGACTATTTGCCAAAGAGGTGACACGCAATGAGCCTGATGGACAGAATGCGGGCAAAG  
CAGGAACAACCTGCGGATAGCATGAACGAGAAGTTTGATAATTCTATCCACAAGCGCGAAG  
AGTCAATAGCTCGTCATAGGCAAGAATATGAGCGTAGCCGCCAGAACTAAGGGAACCTGA  
CCAACTGGCAAAAGAGCGTAAATCTCAACCCCTAGTACGCTTCAAACAACCTGCGCGTAA  
TAGGCCTTACATTTTTGATTATTGGGGTAATCGGACTAATGCTTATCCACTGTTAAATTTAAC  
CGGGTAATAATCTTAATTA

>WBC-2

TAAATCAAGATAAAAATGAATCGAAGTCTCTTTTGGCAGTGTCTTCTAAATCTGCGATAGTAA  
TTTCATTTTTTAATCAGGAGACTTTTTATGTACTGCATCTCTTCGAGCTTTCGCTTTTTCTTGAAG  
AATATATGGGAAGTCTTCAACATGAAACTGGGATCTTATTTTCGGCAGCTTCTGCTTCATCCTT  
CGCCCATCTGGTAGCACTTTTGTCACTACCCTTAAGAAAAGTGGATCGACATCAAGAT  
ATTTCCGAGACGGTCAAGAATTCAGGATTAATTTCTACCATCTTCTTTGCGCGGGCGGATAG

TGCGGTCAGATGCATTTACCGTAGGATCAATGTTCAATTTCCGAAGGCTGATCTTACGGTATG  
CGACTGCTTCTTGAAATCGGACAACGCTAAAATCAAGGGTATCCATTGTGGGTCTTCTCTTT  
TTCTCACTCTGGCCCTCCTATAAATGCGGACATTAATCATTACTGGCAACAACAAGAAGT  
TTGTAATTTGTTGAATATTTTGAGTTATCCTGTTATTATAATCATACAGCAGAAAGCTAAAAA  
ACGCAATAACCGGACATAAAAATAGGAGGATGTTGTAATGAGCGAGTTCGGTGATACAGCA  
GGTGTAACGTAATGGGAGTGGTGGCAACGGTGCTTAACAGCAAACATGCGCCATTGTATG  
TAACAGTCATTGGTATAGTAGGCGCTTTCATAGCTTATGAATACTTCGAAACAGTCAGCAAG  
GGCATGAATCTCGGATATGATTCTAACGCAACATTTGCTATCGATTGCGGGCTGCAATTTAC  
TAAGCAGTCCCGTGTTAATGAGATCGGTGCATCTGAAACTCCAGAGGAAACCAATGACCAA  
AAGCCAGCCGATACAAATCAAACCTGAATGAGTAATATAATGGACGACTTTCACGGTTGACC  
GGTATATACTGGTAGCATATAAAGCTGTAAAACGACGAAGCCTTCACGGGGCCAAACCCGC  
GAGGGCTTTTGCTTTGCCCTGAACGAAGGTGAACCCATGCCATAAAGCCAAAGCGTCCATG  
CGCTTACCCCGGTTGCGGTCGGCTTGCTGTACGCGAGCAATACTGTGCCGAGCATCAAAAGG  
TTATGGACAAACAGTACAACCAGTACGAACGTGATCCCGCATCCAACAAACGCTACGGCAG  
AAGCTGGAAACGCATCCGTGACCGCTACATCAAAGCACACCCTCTATGCGAGGAGTGCCGG  
AAGCAAGGCAAGCTGACGCCAGCTGAGGAGGTACACCACATCCTCCCGCTCTCACGTGGCG  
GCGGCAACGAAGCCAGCAACCTCATGGCTCTATGCAAACCGTGCCACGCCCGCATCACAGT  
CGAGATGGGTGACCGCTGGCACGACAAATGAGGTTTGTATCACATTTTGATAACCCCACTTG  
GTCTGTGCCCAAGTGGGGGTATCAAATCTCTAAAATAAAATTCTCGGACAGCGGCGTGGG  
GCTTCGTGTTGAAAAACGCGGTTTCAAACGGTGAATAGCCCCGGCACAAAAGGAGTGTA  
TGAAAATGGCGAAAGACGGCACCTGCAGAGGCGGCGCTCGTGTGGTGCGGGCGCAAAAAA  
GAAGCCGCTCGCCGATAAGATTACAGCCGGAAACCCCGGTGGCAGAAAACCTGACAGTGATG  
GAGTTTTCCGACACAGCCGACCTTCAAGGTCAGGCAATGCCGGAGCCAAACAAAATGCTTG  
AAGCCGTACAAAAGGATGGCAAGACACTCGTGGCAGCTGATATCTATAAAAACACATGGCA  
GTGGCTGAACCAGCGCGGCTGTGCAGCACTCATCTCTCCACAGCTTTTAGAGCGTTATGCCA  
TGAGCGTGGCTCGGTGGATTCAAGTGCAGGAGTGATCTCCGAGTACGGTTTTCTGGCGAAG  
CACCCACCCAGGGCAATGCGATACAGAGTCCGTATGTGGCGATGAGCCAGAATTTTCATGA  
CGCAGACCAACCGCCTATGGTATGAGATTTTCCAAATTGTGAAAGACAACCTGCACCCGGCGA  
ATACAGCGGAGCCAATCCGCAGGACGATGTGATGGAGCGGCTTTTGACTGCTCGGAAAGGG  
AAATAATATGACTACTTACAAAACAGCAGAAAGCGTATGCGCCGACACCCGGATAAGCTG  
TGCGACATCATTGCCGACAGCATTCTTGACGCCTGTCTGCGCAAAGACAAATCATCCCGTGT  
TGCCTGTGAGGTCATGGCAACCAAGGGCAAATATCGTTGCGGGCGAGATCACCTGCGAC  
GGCAAAGTCGACATCCGCTGGGAGGTGCGTGAAGTCCTCCGCAAGGTCGGATACAATCCGT  
GGAAGTTCACAGTTTTCTGTGTTTCGTCCATAAACAGAGCAGGGATATCGATGCCGGAGTGACT  
ACTGCCCTCGAAGCCCCGAAACGGCAGTGAGGAACGCTATGCCTCCATCGGTGCGGGCGACC  
AAGGCACCGTCTACGGTTACGCCACAAACGAAACCCGCGAGATGCTTCCACTCCCGCTGGTA  
CTGGCGCATCGCATCGTGAAGCGCCTTGACACCGTCCGCAAGGACAAAATTGTGAAAGGCA  
TTTTGCCGACGGCAAAGCGCAGGTCACGGTTCGAATATGAGGACGGAAAGCCCAAGCATGT  
GAAAACGATTGTGGTCTCCGTTTCAAGTACGACAAGAATAAAACGCAGGTGCAGCTTACTCCG  
ACATTAAGCAAAAATGTTCTGTGGCAGTGCTTTGAGGACTTTCCTTTGACGATGAAACAGAA  
ATCCTCATCAATCCCTCCGGCAGATTTGTGCGAGGGCGGACCCGCGCCGATACAGGCTTGAC  
GGCAGAAAGATGATGGTGGACACCTACGGGGGGCTTGCTCTTCATGGCGGAGGTGCGTTTT  
CCGGCAAAGACCCACCAAGGTCGACCCGACGCGGCGCTTACATGGCGCGGTACATCGCAAA  
AAATATCGTATGGAGCGACTTGGCTGAAAGATGCGAGGTGCGCTCTTTCTTATGCCATTGGCA  
AAGCTGACCCCGTGGCGGTTAATATTAACGCCTTCGGCACGAGTGCGCTGACCGATGAGCAG  
CTACGAGAGATTGTGCTGTCTGTGTTCAACCTGCGCCCCGGCGCAATCATTGAAAAACTGCG  
TTTGCGAATGCGATATACGAGGACACGTCGGTATACGGACATTTCAATTCCTGTCTCTTCCC

GTGGGAGGATTACGATAGGTACAAAGAAATCAGAAAGGCGGCGGAGAAATATGCTGATAG  
AAAAGATTCAGACTGATCGGCTCATCCCCGCCGATTACAATCCCCGCAAAGACCTCAAGCCA  
GGAGACCCGGAATATGAAAAGCTGAAACGCTCGCTTGAGGAGTTCGGTTATGTTGAACCCG  
TTATATGGAATAAGATCACCTCTCATGTCGTCGGCGGTCACCAGCGTCTGAAGGTGCTGCTC  
GACATGGGCATCACCGAGGTTCGAGTGGTGGTGGTTCGAGATGGATGCCGAAAAGGAAAAGG  
CACTCAATGTTGCGCTCAATAAAAATAAGCGGCGATTGGGATAAGGATAAGCTGGCTCTGCTC  
ATCGCGGATTTGCAAGGCGCGGACTTTGATGTTTTCGTTACAGGCTTCGACCCCGGAGAGAT  
TGACGATCTTTTTAAGGATAGCTTGAAAGACGGTATCAAAGATGACGATTTTGATGTGGACG  
CGGAACTGCAAAATCCAGCCGTCACCAAGCCCAGGCGACGTGTGGCTGCTCGGTCGGCATCG  
GCTTGTCTGCGGCGATTCAACCAAAGCCGACACCTTTACCGCTCTGATGGATGGGAAGCTGG  
CAAATCTGGTTGTGACCGACCCTCCGTACAATGTCAACTATGAAGGAACGGCGGGCAAAT  
CAAAAACGACAATATGGAAAGCGGAGCGTTCTATGACTTCCTGCTGGCGGCGTTTACGAAC  
ACCGAAGCGGCGATGGCGCAGGACGCTTCCATTTATGTGTTCCATGCCGACACCGAAGGTCT  
GAACTTCCGCAAAGCGTTCTCGGACGCGGGCTTTCAGCTTTCGGGGTGCTGCATCTGGAAAA  
AGCCGTCGCTGGTGTGTTGACGTTACCCCTATCAGTGGCAGCACGAGCCTGTGCTGTTCCGGC  
TGGAAGAAAAAGGGCAAGCACAACCTGGTACGCAGACCGCAAGCAGACGACCATCTGGGAA  
TTTGAGAAGCCGAAGAAAAATGCCGACCACCCACCATGAAGCCGATTGCGCTCCTGGCAT  
ATCCCATTATGAACAGCAGTCTCACAACTGCATCGTGCTCGACCCCTTCGGCGGCTCCGGC  
AGTACGCTGATTGCCTGCGAGCAGTCGGACAGAATCTGCTTACCATCGAACTGGATGAAAA  
ATACTGTGATGTTATTGTAAGCGATATATTGAGCAGGCCGACGGTGCTGACGGTGTGTCCG  
TACTACGCGACGGTTAACTTATAAATATGACGAGTTGCTGAAGGTGAAGCCGGATGAGTA  
AACCTCTATATCATGTTGTTTCGCTATCCGGCGGCAAAGACAGTACCGCAATGCTCCTCGGC  
ATGATTGAACGCGGAATGCAAATCGATTGTATTCTTCTGCGATAACGGGCTTGAGTTTCTT  
GCGATGTACGATCATCTGGAAAGACTTGAGCGGGATATCGGCAGATTAATTACACGGATAC  
GCTGCGGGCAGTCATACGAGTATCTGATGTTTCGACACCCCGTCAAACGAAAAACCGATAC  
GCAGTTTTCTCAGAAATATGGAAACATTCATACCGGCTACGGGTGGGCGGGACCAAAGATG  
CGATGGTGTACGGCAAAGCTGAAAGACGGACCTCGAGAACGGTTTCTGCGGCCGCTGCGGG  
ACAAGTATGACGTTATCGAGTACATCGGCATCGCAGCGGACGAAGGCTATCGTCTGGAACG  
CAAACGCAATAAAAACATCTGTCAATGTGCACCCGCTTGTGCGACTGGGGTATGACTGAATCGG  
ACTGTCTCCGTTATTGTTATTACCACGGCTATGACTGGGATGGTTTGTATGAGCATTTC AAGC  
GTGTGTCCTGCTGGTGTGCTGTCCGCTACAGTTCGCTTTCTGAACTGCGGCAGCTATATAATCATT  
ACCCGGA ACTATGGGCAAACCTTAAAGATTGGGATAAACGGACATGGAGAAAATTTCCGCGC  
CGACTATAGTGTGGAAGAACTCGAAGCCCGTTTTATTTTTGAAGAACAGCGTCTTGCGGATG  
GGCTTCCCATCAAAGGCAAGGCGTTTTTTAATGAACTAAAAACGCTGGAGGGCACC GCCG  
ATGAATAAGCTCACCCCTCGGCTCTTTTTTGATGGCTCCGGCGGCTTTCGGCTCGGTGGTCTG  
CTCTGCGGCATCGAACCGCTGTGGGCTTCGGAGATTGAGCCGTTCCCGATACGGGTAACGAC  
CAAACGATACCGCAGATGAAGCACTACGGTGTGTTTCCTCGCTAAACGGCGCGAATTTGC  
CACCGGTGGATATTATAACTTTCGGTTTCGCCCTGTACCGATATGTCCGTCGCCGGGAAAAGA  
GTCGGTCTGGACGGAAGCCAATCCGTCCTTTTTTATGAAGCGATACGAATTATAAAGGAAAT  
GAGGTGCAAGACCAATGGCAGATACCCAAGATACGCCGTGTGGGAAAACGTCCCCGGCGCA  
TTCAGTTCAAACCAAGGGGCCGATTTCAAGGCAGTCCTTGAAGCGGTGTCAGCGTCACCGG  
GCAAAACACCGAGGTGCCTGCGCCTGACAACGGGCGGTGGCCTTACGCCGACTGCTACATG  
GGAGACGGATGGAGCGTTGCTTACAGAACTATCGACGCGCAATATTTTCGGAGTACCC CAGC  
GCCGCCG CAGAATCTACCTTGTGCGGGATTTTGCAGGCGAATGTGCCGGAGAAATACTATTT  
GAGCCGGAAGGCGTGTCAAGGGATTTTGCGCCGTGCGGCAGCCCGTGGCAAAGA ACTGCCG  
GAGATGCTGAGAACGGCTCTGGAACAACAGGCAGCGGCATAACCTGCCTGAACGACCAAGG  
CGGTGACCGTATGGATATACCGAAGATACGACGGCTACGCTCCGCGCCGAAGCCCATCAC

CCGCCCTGCGTGATGCAGTCGAGCGGTTTCTGCACAGAGCACAGCGCCAAAAGCCGAAGCG  
TCGGCTATGAAGAGGAACGCTCTCCACGCTCCGTGCGGGGATTGTGCCGGGTGTGCGGATC  
GAAAACCATCCCACCGACGGTTCGTGTCAAGGTTTCGGAAGACGGCATGGTGCAGACGCTCA  
CTTCCCGTATGGGTACGGGCGGCATGAACACTCCGCTTGTACTGGACACGCCGAAAACGTTG  
AAAATTCGTTCCGGCTGTGTGGGTGGTGGCAAAGGCGCGCTGATTCAAGACGATATGTCCCG  
AACCTCGGCTGTAACAATGACCAGACTGTTTTTGTTCGACCGCTTACGGTATCTGTTCTGA  
TAAGAGCAATTCATGATGTGCGATAATCCTCACAGCGGCATTTACAAAGCGGACACATCCC  
GCACCATCGATGCAAACGGCGGCAACCCCAGCTGCAATCAAGGCGGTATCGCCGTGGTTGC  
CTTGCAGGGTTCATGATTGGACGCGAGGATGAAAACGGTCCCCAGGGCAGTGGCATTGAT  
GAAAATGTGTCTTTCACATTAATAACGGTCGACCGCCACGCCATCGCCTATGCTATGACCAC  
AGGCAGCTTTCACAGGTAACGGAGGAAAAATCGCCAACGCTCATGTGCGGTGACTATAAA  
GACCCTCCGCTTGTTAACCAGCCGACTACATCGTCCGACGGCTGACGCCAACTGAATGCGC  
CCGGCTTCAAGGCTTCCCGGACGGCTGGTGCGCCGGTCTCGGCACGGATAACCCAACCGAG  
GATGAAATCGCGTTCTGGGCTGAGGTTTGGGAAACTCACCGCCGTATCATCGGCACAAGCGA  
AAAGCCCAAGAGCCGCAATCAGATTATCAAATGGCTGAACAACCCGCACTCCGATGCCGCC  
GAATACAAGATGTGGGGCAATGGCGTGGCGCTGCCGTGTGTTTGTCTTGTACTTACAGGGAT  
TGTGTCGTCTACACAAGAAACCGCTTGATTATCGGAACATTATTCTCCACATAGATGAGCCC  
TGAATTGCTTGATAAATCAGGCATTTAGAGTGATATATGTATGTACCGAAAAGAGAAAGGC  
GGTATAACAATGACAATCAACTACAATGTAACAGGCAGCGAGCGCAAACGGCTCGTGCAA  
ACAATCGCGGAAATTATAGAGTGCAGCGCAAATATAAGGGCGCTCCGACCTTCGCCTACG  
AGGTGAACTATTTACCATCGACAAAACGGCGTCTTATCCTTCGACGACCGTGCCGACAGC  
GAGGAAATCGAAAAGCTCATCGAGGGTCTGGCGGAGCGGGGCTTTGAATTTGACGGGTACG  
ACAAGACCGCGCTTACCATTGAAATGCCCGCTCGTTCCTCACAGAAACGGCTCTTGAGAAT  
CTCAGCCGAATGGTGGAAAGCAAAGGCTCGCTCATAAAAAGGCACTGGGCGTTACCGACC  
TGTCTATCCTAAAGGGTGAGGAGACGGTCAGCTTCCCGTGGTTCCTCGATGCAAGCGACCCG  
GACGCAGTAAAGGCTTATACCCACCTTGTCACTGCGCTCTGTGAGATGGCGAAAACGCAGA  
AACGGGTGACGCGACCGACAAGCCTGTGGACAACGAAAAGTACGCCTTCCGCTGTCTCCTC  
CTCCGGCTCGGTTTCATCGGCTCGGAATATAAGGCGGAGCGAAAATTCTGCTCTCAAAGCT  
GACAGGCAGCTCAGCGTTCAAACAGAATAACTGCAAGGCGGTGGATGAAGATGAATGAGCT  
TCCCACCGCTTCTTCGTTGAGTATCCATTTTCGCATTGAGGACTTAATCCGTCCTCATTTATC  
GGAATGGGTGAAACCGTATATAGTGGAAAAGGAAATTAGGCTCGGTAAAATTGATTACGAA  
AACTTTATAACCGACTTATGTGTTGACAGATGGTTTATAGAAAATACACGAATCTTTGTAG  
CATAGACGAAAACGGAGTTTGGCATTGTGTTTTGGTAAGGCAAAAAGGAAAATCCGAGGGC  
GTGTTGGTTATGTGCGGAAGGTAGAGTTTTTCTAAATGGGCTGCGTATTTGCCAAGTGAGGA  
GGTAGCTGAATGAACATACATCCTGAAATACTCAAACAATTAAGAGATTGCTTTACGCCCGG  
AACCCGTGTGGAGCTTATTCGTATGGACGATGTTACGGCACCGCCCGTAGGTACAAAAGGTA  
CGGTGTCGCGCGTGGACGACATAGGCTCCATCATGGTCAACTGGGATAACGGCAGTGGTTTTG  
AATGTGGTATACGGCGAGGATATCTGCCGGAAGGTCGGTAACGGTGATGAATAATAACGTT  
TTACATGATTTTTATTACGGCAACATCGTCCCCAACGAAAAGCGGTTCTGTGCTAATTTCTGAA  
TTCGGTCGCGCAGCGAAAGAAATTTCCGAAGCCGACGAGTATCTTCACTCAATATTGGACGA  
AGCGGGACTCGCTGTTCTGGATAAGCTCACTTCGGCGCAAATGACACTGGATTCCATCACCG  
CCGAAGAAAATATATTGATGGCTTTAAAACAGGGGCGAGATTCGTACTIONGCTATTATGGAT  
GACCTGCATGGCGATAACCGTCCGGTCACTGAATAGGTATAAATAACTTCGTAGAACAGCGC  
CGGAAACGGCTCTGTTTTCTCGTACAGATAGATTTTGGAGGGCTTGGCGACGGCAGGTCTATTT  
TTATGCTCTGCGAAAGGAGGCGGCGGTATACGAAAATTAATAACAATCCCACCCGG  
TTCAAAGCTGCGGATTCGGTTTACGACAAGGCCGCCGCGATTATGCCGTAACCTTTCGTGCGA  
AGCCCTCTCCATACAAAAGGAACATGGGCAGGAAAGCCCTTTGAACTGATCGACTGGCAG

GAGCAGATTATCCGTGATGTGTTTGGCACTTTGAAATCCAACGGCTACCGACAGTTCAATAC  
CGCCTATGTGGAGATTCCAAAGAAGATGGGCAAATCCGAGCTTGCGGCGGGCGGTGCGACTG  
CTGCTCACCTGCGGAGATAACGAAGAGCGCGCCGAGGTTTACGGCTGCGCCGCCGACCGTA  
ACCAGGCGTCAATAGTTTTCAATGTGGCGGCGGATATGGTCCGGATGTGTCCGGCGCTGGCA  
AAACGGGTAAAATCCTTGATTCCATGAAGCGGCTAATCTATCTGCCGACCGGGAGTATTTA  
TCAGGTGCTGTCGGCGGACGTCGGCAACAAGCACGGCTTCAACACCCACGGCGTGGTATTTG  
ACGAACTGCATACCCAGCCAAACCGAAAACCTCTATGACGTAATGACCAAAGGCAGCGGCGA  
CGCGAGAATGCAGCCGCTGTATTTTCTTATCACCACCGCCGGGGACAATCAGCACAGCATCT  
GCTGGGAGGTTTCATCAAAAAGGCGCTTGACATCCTCGACGGCAGGAAGCACGACCCACCTT  
ATATCCCGTTCATCTACGGCGCGGCACAGGAGGACGACTGGACTGACCCTAAGGTGTGGAAG  
AAAGCGAATCCGTCACTTGGCATCACGGTCGGCATGGATAAGGTCAAAGCTGCCTTCGAATC  
GGCACGGCAGAATCCAGCCGAGGAGAACAGCTTCCGTGAGCTTCGCTTGAATCAGTGGGTC  
AAACAGGCGGTGCGTTGGATGCCGATGGACAAATGGGATAAATGCGCATTCCCCGTAAACA  
CAGATAGTCTGCAAGGGCGTGTCTGCTACGGAGGACTCGACCTTTCGTCTCCACTGATATT  
ACGGCGTTCGTGCTGGTATTCCCGCCGGAGGACGAGGCGGACAAATACATCGTTCTGCCGTT  
TTTTCTGGATTCCGGAGGATAATGTGGATTTTTCTGTGCGAAGAGACCATGTGAATTACGACA  
TCTGGAAGAAGCAGGGATATCTTGAAACCACCGAGGGCAACGTCGTGCATTACGGCTTCATC  
GAAAGATTCATCGAGGAACTCGGCACCAAGTACAACATCCGTGAGATTGCCTTTGACCGCTG  
GGGTGCTGTGCAAATGACGCAGAACCTTGAAAACCTCGGCTTACGGTCGTGCCGTTCCGGTC  
AGGGCTTCAAGGATATGTCCCCTCCAACAAAGGAATTGATGAAGCTGACACTGGAGCAGAA  
AATCGCTCACGGTGGTCACCCAATTTTACGGTGGATGATGGACAACATCTTCATCCGTACCG  
ACCCGGCGGGCAACATCAAAGCGGATAAAGAAAAGTCCACCGAGAAAATAGACGGCGCGG  
TGGCAACCATTATGGCGCTTGACAGGGCGATTCCGGTGTGGAAATGAAAGCGGTTCTTCGGTT  
TATGATGATCGCGGGCTGCTTGTTTTTTAGTAAAGGAGAGTGATGTCTATGGGAATATTTCA  
AGGAATATTCAAGGCGCGGACAAGCCTAATAACAGTCTGGGCGGCAGCCGTTACAGCTTC  
CTTTTCGGCGGCACGACAGCCGAAAGCCTGTCAACGAGCATAACGCCATGCAGATGACCG  
CTGTGTACTCATGCGTCCGAATTCTATCAGAACTATCGCAGGACTTCCGCTTCATGTGTACC  
GCTACAACGATACAGGCGGCAAGGAGAAAAGCCTGCAACACCCGCTATATAAGCTGCTCCA  
CGATGAGCCGAACCCTGAGATGACTTCATTCGCGTTCCGGGAAACGCTGATGAGTCATCTTT  
TATTATGGGGCAACGCTTATGCGCAAATTATCCGCAACGCACGTGGAGAGGTGATCGCCCTC  
TACCCGCTTATGCCCAACAAAATGACAGTCGACCGTGATTCAAACGGCCGGCTTTTTTATTT  
GTATCAGCGAAGCACCGATGATGCACCGACGCTCGGTAAAGACAGCCAGGTATACCTTGGC  
CCGTCCGATGTGCTGCACATTCCCGGCCTGGGCTTTGACGGTCTGGTTGGGTATTCGCCCAT  
GCGATGGCAAAGAACGCCGTGGGATTGGCAATCGCCACCGAGGAATATGGGGCGAAGTTCT  
TCGCCAACGGAGCCGCGCCGGGCGGCGTGCTGGAGCATCCCGGTACTATTAAGACCCGCA  
GAAGGTCAAGGAAAGCTGGAACCTCCGCCTACCAAGGCTCGACGAACGCACACAGGGTGGCT  
GTGCTGGAAGAAGGCATGAAGTACCAAGCCATCGGCATCTCGCCCGAACAGGCGCAGTTTT  
TGGAACACGGAAGTTCAGATCAATGAAATTGCCCGCATTTTCAGGATAACGCCGCATATG  
CTCGCCGACCTCGAAAAATCATCCTTCAGCAACATCGAGCAGCAGTCGCTGGAATTTGTAAA  
ATATACTCGACCCGTGGGTGGTGCCTGGGAGCAGTCCATGTGCCGCGCCCTGCTGATGG  
AGAGCGAAAAGCCACTGTGTTTCATCAAGTTCAATGTAGACGGCCTTCTGCGTGGCGATTAT  
CAGAGCCGTATGAACGGGTACGCCACGGCAAGACAGAACGGATGGATGAGTGCAAACGAC  
ATCCGGGAGCTTGAAAACCTCGACCGTATTCCAGTGGAGCTTGGCGGCGATCTCTATCTCAT  
CAACGGTGCATGACCAAATTACAGGACGCGGGCGCGTTCGCAAATACAACAGGAACGGAG  
GAAAAAACGAATGAAGAACTTCTGGAACCTGGGCAAAGGATGAAGAATCCGGTGCCCGAAC  
GCTCTTCTCGACGGCACGATTGCCGAGGAAAGCTGGTTTGACGATGATGTCACCCCGAAAG  
CATTCAAAGCTGATTTGACTGCCGGAGAGGGTGGCATTGTTATTTGGATCAACTACCCGGC

GGCGATTGTATTGCGGCAAGTCAGATTTACGCCATGCTCATGGATTACAAAGGCTCGGTAAC  
AGTCAAGATCGACGGTATTGCGGCTTCGGCGGCAAGCGTTATCGCTATGGCGGGAACGAAG  
GTGCTCATGGCACCCACGGCGCTGATGATGGTGCATAACCCGCTGACCATCGCAATCGGCGA  
CAGCGAAGAGATGCAGAAAGCCATCGCCATGCTCGACGAGGTCAAGGAGAGCATCATCAAC  
GCCTATGAAATCAAGACCGGGCAGTCCCGTGCAAAGCTTTCCACCTCATGGATGCGGAAAC  
TTGGCTCAACGCTAATAAAGCCATAGAAGCTGGGTTTTGCGGACGGCGTTCTGGAGGATGAAA  
AGAAACGTGTGCAGGCCGAGGATATCACCTACGCTTTCAGCCGCCGGGCAGTCACGAACTCT  
CTATTGAACAAGCTGTCCCCAAGAAACCGCCTGTGAAAACAGGCACACCCGTTGAGTCGCT  
GGAGAAGCGGCTCTCTTTAATTTCACTAATTTATAGGAGGAAAAACACATGAGTAAAATT  
CTTGAAGTGC GCGAGAAGCGCACAAAGGCGTGGGAAGCGGCCAAGGCTTTCCTCGATACCA  
AGCGCGGTGCGGACGGTCTGGTCTCCGCCGAGGATACCGCCACCTACGACAAAATGGAAGC  
CGATGTCGTGGCACTCGGTAAAGAAATCGACCGCCTGGAAAAGCAGGAAGCCCTCGATCGC  
GAGCTTTC AAGCCGCTGAACACCCCGCTTACCGGCAAACCCGCTGTTCCCGGCATGGAGAT  
CAAGACGGGTACTGCTGCCGCTGAATACAAAAAGGCAATGCTGGACGCTCTGCGCTCAAAC  
TTCAAGAGGATCAGCAATGTCTGCAGGAAGGCATCGACGCAAACGGCGGTTATCTTGTCCC  
CGACGAGTACGATAGCCGCCTGATTGACGGGTTGACCGAGGAGAATATCTTCCGTAAGCTTG  
GCACTACCATCAAAACGAGCGGCGAACACAAAATCAACATTGCCGCCACGAAGCCCGCAGC  
GGCATGGATTGAGGAGGGCGGTAACCTCACTTTCGGAGACGCGACATTTCGCACAGATTATCC  
TCGACGCGCACAAAGCTTCATGTGGCGGTAAGGTCACCGAAGAACTGCTCTACGACAACGC  
TTTCAACCTTGAAAATATATTCTGACGCAATTTACCAAAGCTCTCGCCAACACCGAGGAGG  
ATGCGTTCCTCAACGGCGACGGCACGGGCAAGCCCTCGGTATCTTCGATGCAACAGGCGGC  
GGACAGGTCGGCGTGACCACTTCCGGCAGTTCATTACAGCCGATGAAGCGATTAACCTTGT  
GTACACACTGAAACGTCCGTACCGCAAGAACGCGGGGTTTATACCAACGACCAGACGCTTT  
CCGTGCTGCGTAAGCTGAAGGACAACAACAGCGCATATATATGGCAGCCCTCCTATCAGGC  
GGGCGAGCCGGATAGACTTCTCGGTTATCCCGTTTACTTTCGGCGTATGTTCCCGTCATCGC  
CGTCGGTGCGCCGGTTATGGCATTCCGGCGACTACAGCTATTACAACATCGGCGATCGCGGCT  
CCCGTTCTTCGCGGAACTCAAGGAACTGTTCCGGCGTCAAGGCATGGTTGGATTCTGTCGCC  
AAAGAGCGCGTGGACGGCAAGCTGGTATTGCCTGAAGCCGTACAGATTCTGAAAATCAAGG  
CTTAATGAAAGGACGGTGGCGGTATGACGCTGCTTGAGAAAGTCAAAGCAAATCTCATTCTG  
GAACACACGGCGGACGATGAACTACTGCAGATGTACATCACCGCCGCCGTTAAATATGCTG  
AAAGCTATCAGCATCTTGCAGAAGACTACTACTCCGGCCATCAGATGCCGCCTACCACAGAG  
CAAGCCGTCATTATGCTGTCGTCCCATTTCTATGAATCCAGGGACGGCAGCACGGGCGGCTT  
TTTTGCCGACAATGTGCAGGCGGGACAGCAGGTTTGGGACACAGTCAATCTGCTTCTGCGGC  
TCGACCGGGATTGGAAGGTGTGAGCATGAGTTTTGGTAAGATGAACACCTTCATCGACATCG  
TTGAGAAAGTGACCATAAAAGATGCAGAAGGATCCGAACCGAGGTTGACAGTATCGTCGC  
TTCGGTTAGAGCGTACCGGGAAGGTCGGCACGGCACCGAGAAATGGGCTAACAGAGCCGCT  
TTCTCTGAAGCCACCGACCTTTTCTGCTTTCGTTGTATTCCGGGCGTTACGGTCACGACCGCA  
ATGGTCGTGGTGAACGACGGGGCGCGCTTTGAAAATCATCTCGGTGCGAGAATGTAAAAGGTC  
GCGGGATGTACATTGAGGTAAGGAGGTTGAAGCCGAGTGGCTAAAGTGGGTATGA  
AAATGCCGGAGGACTTTCTTCTGAAGCTTTCACGGCTTGGTGAAAAACGGATGAAATTATC  
CCAAAGGTTCTTGAAGCGGGCGGCGAGGTCGTTCAAGCAAAGTAAAATCCAACCTGCAAG  
CCGTATCGGCAGCGGCACTAAGGATGAAAGCCGCTCTACAGGTGAATTGGTTTCAGCGCTC  
GGCGTTTCTCCGCAAGACAGGATAAGGACGGGAATTTCAATGTAAAAGTAGGCTTTTTCAGA  
ACCTCGTTCTGACGGCAAAGCAACGCCATGATTGCGGGGGTACTGGAATACGGTAAAAGC  
GGACAGCCCGCGAAGCCCTTTCTAAAGCCCGCAAATCAGCAAGCAAACCGCTGTGTTG  
ACGCAATGATCGCGGCATTTGAGAAGGAGGTCGAAAACATATGAGCCTGCTGGAAGAACTG  
AACACCCTCCTCTCGCCGCTTGTCCCCGTTGAGACAGGTGTGTTTTCAAATCCGCCCGGAC

AGATATGTTGTGATTACGCCGCTGGCGGATACTTTTGAAGTGTATTCCGACGACAGTCCCCG  
GAACGAATCACAGGAAGCCCGGCTGTCTCTTTTTGATAAGGGCAGCTACACATCTGTAAAAA  
ATCATATTGTCCGCGCTCTGCTGAGCGCGGAATTCATCATAACAGACCGCCGGTATGTAGGA  
CATGAGGACGATACCGGCTATCACCCTACGCCATCGATGTGGCGAAAATTTACGAACTGG  
AGGAATAACATATGGCGACAATCGGACTTGATAAGCTGTTCTACTCTAAAATCACAGAGGC  
AACGGACGGCACCGAAACTTACGGCACTCCCATTTCTCTCGCCAAGGCGATGAAAGCGGAT  
CTGTCCGTCGAGCTTGCAGGAGGCGACGCTCTACGCGGATGACGGACCCGCCGAGGTCGTGA  
AGGAATTTAAGAGCGGCACTCTCTCGCTGGGCATCGACGATATCGGCGTTGCGGCCGCCGAG  
GATCTGACCGGCGCAAAGCTTGACGACAATCACGTCGTGGTCTCCGGCAGCGAGGACGGCG  
GCACTCCCGTCGCGGTAGGCTTCCGTGCAAAAAAAGCAAACGGAAAGTACCGCTATTTCTGG  
CTGTACCGGTTAAAATTTGGCATTCCGGCGACAAACCTCGCCACAAAGGGCGACAGCATCAC  
CTTCTCCACCCCGACCATCGAGGGTACGGTCTTCCGCCGCAACAAGCTGGATGGGAACGGCA  
AGCATCCGTGGAAGCCGAAGTGAATGAGGACGATACGAGCGTTCGGGCTTCCGTTATCAC  
CGGCTGGTACGCGCAGGTCTACGAGCCTGTGTTTACAGCGCAGGCTGGAGGTGAAGGTTAA  
TGGCTGACGAAAGAAGCTCAAAAATTACCATCGGCGGCGCGGAGTATGAGATGCTTCTCAC  
CACAAAAGCGACAAAGGAAATCGCGGGGCGCTACGGCGGACTTTCCAATCTCGGAGAGAAG  
CTGATGAAAAGCGAGAATTTGAGATGGCCCTCGATGAAATCGTATGGCTCATTACGCTGCT  
CGCCAATCAGTCGGTACTGGTACACAATCTGAAAAATCCCGTAAAAAAGCGCGAGCTGCTC  
ACGGAAGAAGCCGTTGAACTGCTTACCTCGCCCTTTGAGCTTGCAGATTACAAAAATGCCAT  
TATGGACGCAATGTATAAAGGTACGAAGCGTCATGTGGAAGTGAGGACGAACCCTCAAAA  
AACGCGGAGGTCGGGTAAGCGACGAAGAGTTGTTTGCCCGGCTGATTTTTTATGGAACGACC  
CTGCTCGGCCGGGCGGAGTCCGAAGTATGGCTGATGCCGATCGGACATCTGCTCGACCAGTG  
GGAGGTGTACAAGCAGTTTAAACGGTTTGGTAAAGCCGAAACGAGAGTATTACATCGACGAA  
ATCATAACCAAACGGCATCTAAACCGTCGTTGTAAAGTACACAATAACCCTCACAAATCAAGC  
ATCACACCACTAAAAGAACAATACACCTTACGGATTGACTTTTAGATAAAGTCAATGTCATA  
ATATTTTTAAGGTTATTTTGAGAGAGGTGCTGGTATGATCGATTGGAACGGAAACGGCAAGA  
TTGATCCCGTGGATATCGGCATCTCCTTGTGCTGATTGAAGAAGCAGAGAAACCTCATAAG  
AAAAAAGGCGGTGGATGCCTTTCTTCTGTGATTATTATGCTCAGTGCAATTGGTTGCTTCA  
TGGCTTGTAGGGAGTGTATTTATATGACAGTAAAAGAAGAGATCATGATAGCGGTAACCTCA  
GTTCCAGGTATCACTGATACCGAACTGGAAAAGAGATACGGGCGAAGCCATCAAACGATT  
AACATAGCTTGTAGGGATCTTGTTCAAAAAGGACTTCTTGTCCGCCAGTCCAATCCAGAGAA  
GTACGGTAATCTGGGCAACTACCCGACTGGAAAAGTTCCTGAAGTTGCAACGGTGACGAAG  
CCGGCAATCTCTGATGACCTTGTGATGAAGATGCAGTAAAAGCACATATCAAGGATTGGCTTGA  
AAATCAAGGTTGGTCTGTAAAATCGCTTGGGGGAAAAACCACGGGGTTGATATTGAAGCT  
ACAAAATCCGGAGATCGTTGGCTCATTGAAGCAAAGGCCCCCGGTTCCCGTCAAGCTATGCC  
ACACAATTACTTTCTTGAATTCTTGGCGAGACGTTACAACGCATGGATGATGATAATGCGC  
GGTACAGCATTGCATTTCCGGATATGGCTGTTTACAGAGGGCTTTGGAATCGTTTGCCATA  
CTGGCAAAGCAGCGAACGAAGATAGATATGCTACTTGTGCCGAAAACGGAGACATATCTA  
TTCTCAGATAAATCTGATACCTACCTTCTTTGAAAAAGGCACTCCGAAAGGGGTGTCTTTTT  
CATGCCATTTTTTCGACGAGGAGGTGAGAAAATGGCAGATAATTTTGGCCTAAAAATCGGTG  
TTGAGGGCGAAAAAGAGTTCAAGAAATCCCTTGCCGACATCAACCAGTCGTTCAAGGTTCTC  
GGCTCGGAAATGAAGCTGGTGGAATCGTCCTTTGACAAAAACGAAACCAGTGTCGAGTCGC  
TCACCTCAAAAATGAGGTTCTGACCAAACAGATCGACGCCAGAAAGATAAAAATCGAAAC  
GCTCCGCAAGGCGCTGGAAAACGCCTCCGACTCCTTTGGCGAGAACGACCGCCGCACCCAG  
CAGTGGGCGGTGCAGCTGAATAACGCGCAGGCCGAACTCAACGGCATGGAGCGCGAGCTGA  
AGGACAACGAAAAGGCTCTGGACGATGTGGCTGACAATTTTGACGATGCCGAGAAGCAAGC  
CGACCAATTCGGAGACGAGCTTGACAAAACGGGCAAAGATGCAGATTCAGCCGGTAGCAAG



TTTGAAAAGCTCGGTTCCGTGGTTAAAGGAATCGGCGCGGCTATGGGCGTGGCTTTCGCCGC  
TATCGGCACCGCTGCAGTCAGCGCGGGTAAAGCTCTGGTCGATATGACCGTGGAAGCCGCC  
GCATACGCGGATGAAATGCTGACACAAAGCACTGTTACGGGTATGTCCGTGGAAAGTCTGC  
AGGCGTACTCCTACGCCGCCGATCTGGTGGATGTTTCTTTGGATACGCTCACAGGCTCTATG  
GCGAAGAACGTCAAGTCGATGTCGAGCGCAGCGGACGGCTCCGCAAATATGCCGACGCAT  
ACGCGGCACTTGGCGTATCGGTTACCGATGCCAACGGCAATCTCCGCGACAGCGAGGACGTT  
TACTGGGAGGTCATCGACGCGCTCGGCGGGGTCTCCAACGAAACAGAGCGTGACGCTCTCG  
CCATGCAGCTTTCGGCAAGAGCGCGCAGGACTTGAATCCACTCATCGCCAAGGCAGCGA  
GGGCATCGCCGCGCTAACCGATGAAGCGAAACGCATGGGCGCTGTTCTAAGCGAAGAGAGC  
ATCGAAAACTCGGTGCCTTCGATGATTCCGTTACAGCGGCTGAAGCAAGGCTCGGAAGCTGC  
CAAGCGCGTCATGGGTACGGTACTCCTTCCGCAGCTTCAGACGCTTGCGGATGAGGGAACCG  
CCCTGCTCGGCGACTTCACCTCCGGCTTGGTGGACGCCGGGACGACTTCGGAAAAATCAGC  
GAGGTCATCGGCAATACGGTCGGCGGGCTTGCCGACATGATCATGGAACACTTGCCGAAAA  
TCATTCAGGTCGGCATGGACATCGTCATGGCAATCGTAAACGCAATTGTTGAGAATCTGCCG  
ACCATCGTGGAGTGTGCTTCTCTATCGTCATGACGCTGCTCGAAGGGTTGATTGACGCGCT  
GCCCCGATTACGGAAGGCGCTCTGCAGCTTGTCTTACACTGGTTCAAGGCATCATCGACA  
ATCTGCCCGCTATTATAGAAGCCGCTATTCAGATGATCGTGACTCTGGCGATGGGTATCGCG  
GACGCGCTGCCGGAACCTGATTCCTTCTATTGTTGAGGCAATCCTCCTGATTGTTGAGTACTT  
CTCGACAATATGGATAAAATTCTCGAAGCCGCCTTCGCCATTATAAAAGGACTGGCGGAGG  
GCTTGCTGAACGCTCTGCCTGAACTGATAGACGCTCTGCCCCGAAATCATAACGACCATTATC  
GATTCATCACGGACAACCTTCTGAAATTATTGAAATGGGCATCGAGCTTACCGTTCAGCT  
TGCAGTCGGGCTGATTAAGCCATACCGCAGCTTGTGGCGAAACTGCCGAAATCATCGCG  
GCCATCGTTACCGGCCTTGGAAGCGGTTCGGCGCTGTGTTTGAATCGGCAAGAACATCGT  
GACGGGTCTATGGGAAGGCATCAAGTCCCTCGGCTCGTGGATCAGCGACAATGTTTCCGATT  
TCTTTTCCGGCATTGTTGACGGTGCAAAAAGTCTGCTGGGTATCAACTCACCGTCTAAGGTGT  
TTGCCGGAATTGGTGAAAACATGGGCCTTGGTATCGGCGAAGGCTTCACCGACGCGATGAA  
GGGTGTTGAAAAAGACATTACAGACGCGATCCCCACCGACTTTGACCTTGATATGAATACCG  
GCATCCATAAAGTGATGAACGACACCTCTCTTGAAGTGAAGAAAACCTGTAGAGCATAACAGG  
AGTTATCCGCGTGGAGGGTGTCAATTCCACAGGTGAAATGACCTCGGTCGTGGACATCATT  
TCGACAGGCTCAGACAGGAGGTGCGCGTATGAGTTATCTGGAAAATACAGAAACGGCTGAA  
ATCATCACGCGCTTTGTGAGCTTCCAAAAACGCAGGAGGTCATCCGCACGGTGCAGACTGC  
CCTTGACGGGACGGAATATCTGACTCGTTTCGGTTCGCCGACCGTACATTATGAACTAACGC  
TCTATGTTAATGAAGCCGGGAAAGCCGCGCTGATGACAGCCGAGGACAGCGTTCGGATGCTT  
GAATGCTCTGTAACAGGGAGTTTACCGGGGAGAATTGTTGAGCTTGGCTCCTTTGATTA  
TCAGGCATCGGGCTGGTATAAGGTCACAGCCACTTTCGGCGGTAAGCGAGGTGAGCGAC  
CCATGAGAAGTATACCGACAGCGCTGAAAGAAAACTCGCTAACCGTTTTAAGGTGGAAAA  
CACGGACAGCATGGCAACGCTCCGTGTGGTAGCCACACAGACCTCCGTCAACTCGCTGCTCT  
CCGAGCCGATTACGAAGATATCGCTCCCGCATTCGGCGATGTAGCCGTGCGCCAGACAGCC  
GGAGAATCTGATTTATCTCTTGCATATGCTATCTGTTTGGACGAGGGGCATATCGAATGTGTAT  
AAACGGAAGTTTCCGGCTGGCATGGAGTATCCGTGGGAGTACCAAGTGGACGCTCGGCGCAG  
CGACGGATGTGGCGATTGAATTTAACGGTGTATGGAAAATGAACACCGAAAAGGAATGGTA  
TTACCTACAAACCGAGGAATACCCCTATGTTTTTATGTGCGGGACGGAAACCTCTATGTTT  
AGGCTGGCGTGACAGTGATAATGCCGCGCTTCTCGCATCTGGCGTTTCGCAGATATCCGCC  
TGCAAAGGCTGGCAGTCCAGTGTGGAATCGGACCTTGACCAGGGATTGATCATCGGCTACCT  
CAAAGCGGCTCGGTATATTACCGTGCCTCTGCTGTGAGGAAAACGGCTCCTATGTCTGGG  
AAGCGGAGCATGAAGTAACCGCGCTTGGCACGGGCAACACGACGCTGTGCGTTATCCGTAC  
CAACGATTTCCGCATCGGGTTCCTGACGCATAACAACGGCCGGATGCTGCTGACGCTGACAC

ACCGGAACTACGCCGGAATGAGCGTCCGACCGGAAACGGTCCATATCAACGCTTCAAACGT  
AAAGATGTGGCTTTCTGATATAACCGAACTGGACACGCTGAACAAGGAGTACGCATCCGGG  
AATACGGCCTATCCCCATGTTCTGCTGGATAAGCCGGACACCGAAGAAATCTCCGTGGCCTC  
GGTGGAGAAGCTGAACCGCGAGACAGGTTTCGTTTGCTACGGCTTCAAGATTCATCTCACAA  
AGCCTTTATACGGAAGCGTTGACGCGGGATTCCCGGTGAAATGCGCCCTGTCTGTTTCCGGT  
GTGACCATCGCCTCCGCTTCCTATGACAGCGAGGAGCAGGCTCTTGTCTTTATACGAGCGC  
AGATATCCGCAGGACGGTAGCCGTGACTATCACCATGCCGGAATACCGCTCGCTCTGGTATT  
ACAACTTGGTTTGCAAAGATGGTTTCTACCTGCTCTGAGTGCTGTCGCCGCCGCAGAAACA  
GTGGACTACTTCACTTATGAAAACGAAACGGCTGTTCATATCCACGATTTACGCCGAAGCTTG  
GATTGACGAGACAGTATTTATTGATTGTTACCAGCCCAGCATACGGCTGTTATTACGGTTAT  
AGCTTCGTCTGTCAGCCTGCAGCCTGTTTCCACATTACCGATTTAGGAGGTTTTCAAATGAA  
GATACAAGAACGAGCCGTTCTGCATAACCGGTTTGATGTCAAAGTGGTCGACGCCGCAAGC  
GGCAGGGTCAAGCAGACGGCGATCGGATTCAACGTCATTACGAACTACTATTTAACAGCA  
GGCTGACGGCTTCTCCGCTTAGTAAAACGACAGACCTGTTTCAGATACATCGCGGTCCGGTACC  
GGAACGGGGACGCCCGCGTTACGGATACTGCCCTTTTTTCGCATCTGACGCGCAAAGCTGT  
AACGACGCTGGAGACGGTTTATGAATATCCAACCTTCGCATACTACAAAGCAAATAAAGCTG  
GAAGCGACGGAATGCAATGGCTCCACCATTACCGAGGTGGCTCTCGAAGGTTATTACAGTG  
GCACCTTTTCTACTACTTATTACATCATGTCCCACGCCATGCTGCAGGACTCCGAAGGAAAC  
CAAATTGCCATCGCCAAGACCGATACGGACGTGGTGTATATAACCGCGACATTCTACGCGAC  
CTGTACGCCATCGGGCTTCGGCACAAACGGAATTTATCCCACGGCTGAGAACAATTATCTGT  
TCCAATGGCTGCTTACTGGAAATACAGACGGGTATGTGCGCTTTTCCCGCTTCCCGGTAGAG  
TACTCCTCGGATATGAACGTGAAGTATCACGGGAGTAAAAGCTATTCCTTCAGCGGCGGTAC  
CGGCAATACAACCTACCTACCAGTACGACCTGCCCGTCACCACGTTCTTGACAGCGAGTGCA  
ACAACCGCATCGTCAAGCACCTCGGTGTCGCCGGGGTTCGGCGCGTTCACCTTTCCGAACCAT  
GACGTATTCCCGCCCTATGCGGTGACCATCTTGTTCATCGGCGAAGGAGATGGAACGACAAC  
CGAGTTCAGTATGAAGTGCCCGCTGATACAGTCCGGGACCGTCCGTATTTTTGTAAACGATA  
CGGAAATGACAGAAGGCACGGACTATACGGTGGATTTGGAGAACAACCTGCGGTGACTGGTA  
TGAAAACCTACCATACGGCGGCGATGACCTGCAAAAAGCGCCGGAGTATCCTTTGGAGACCTC  
GCTTCAAAAACGTCATACACAGGTCGTAACCTATCGAGATCCCATAGCTTGGTGGGATTGTTA  
TGATGATACGATGTATCCATCTTCTGACAGTAAACGATGTGAATCCAATTAATAAGACT  
TTGGTTTCGGCAAAGTCCTGCAACACACTGAAGATTGATATTCTGACCGTCCCGACCGCAAGG  
CTCGATACGCTTAAAATACAATACTCAGACAACGATACTGACTGGACGGACGTATCGGGGCT  
TTCGAGGTCAAGTCAGGTTTGGAAATTCACAGAGGTTTCGGCGCGGTATTGGAGAGCGTTTT  
TAAGCGGCGAAGGAAACGCCACTGTCGTCGTCACATCAAGCGGCATGACAGGCTCGCCGAT  
CACCTTTCCGTGCCTGTGGCCTCATCGGATACGGCGAGCATTGTGGCGGGCAAGATAAAAA  
CAGCCCTTGAAAACAATGCGAATATTTAGCTTTATATGATGCGTCGGTCTCAGGTGCGGAT  
GTGGTCTTAACAGCAAAAACGCCGGTGGCGAATGTTTCAAACCTGAATATTGCCCTGTCAA  
CGGTACCTGTGCGGGATTGACTACCGTTTCAAACCTCGACCAATACGACAGCCGGAGTGGCCG  
CTGTAAAGCAGCAGGAAAATATCTATGTTACCGGAACCATCGGGACTGCGGGAAACGCAAC  
GGTTGTGGTAACGGCTGCTGGAATGGCAAACCTCGCCGATCACCATTTCTGTGCCGGTTACAA  
GCGGCGATTTCGGCGACGACCGTCGCAACAAAAGTAAACGCCGCGCTCGCGCTGAGTTCCGA  
CATTACCGACTTCTTCACAATCAGTCCAGATAACGGCAGATATGTCCGGCTGACCGCAAAAA  
CAGCAGCGGATAATGATCCTACCCTGAATATCAGCATTGCAAACGATACCTGCACCGGATTA  
ACCGCTATACCAACATCCACCGTTGACGCCGACGGCAATGCGGGAACAAAACAAGTGGAGA  
CCTTAACCGTATCGGGCAGTGTCAGCTACAGCTGGACTTACAGCTTGTATTACCAGAGTTTC  
CCGACAAGGGACGGTCAGAGTTTCGGCCCAACCTTCTTTTTGGGTAAGACCGTGCCGGGGCT  
GAAGTTCACAATACCGCCTGCCGACGGCGCGGCGATTACAGCCAGCTTTGCGCTTGAATATC

CGTTCAAGACCGAGAACAATCTGTTGCGCTTCACCTACTCGGTTTCAGCTGCAAAGAGGGTGA  
CGCGATGACGCTGACATTTGAATATACCCTTGATACCGGAGCAGGCTTGTATCCGCAGGTGA  
TCCACACCTCGGACAACCTGCTCCGTTTCATATACCTCACCGCCGACGGCACCGTGGCGGGA  
AGCACGGCAGACCCGGTTCTCGGTTTGTACGATAATCTGACCTATACCGAAACCGGCAGGAT  
ATCAACCGATGAAACGGTGTTCGTATCCGAGCATCAAAAAAGTGGCGCATTACGGCGCATA  
GGATTCTGGAGCGCCGAGGGCGACCACCGTTTTGTGATGTATATGCTGCCGACCGACATTAC  
AAATTCGTTTATCGACGGCTCGGTCAAGTTCAGCATCGGCAGCGAGGTCTCGCAGATGTCCT  
GCACCCTGCTCAACATCAAGGGGGCGCTGCTCAATCGCTACCGTGCTTTCGTGACACCCGGC  
ACCAAGATGGAGCTGTACTTTTCACTCGGAGACAGCGGCGAAATCACGCTCGGCATTTTCTA  
TATCGACCGCGCTTCGGTCGCGTACCCGGACGAAAAAGTATCGGTGTCTGCCAGAAACGCA  
ATCGGCAAGTTGCTAAAGGAACAGACCTTTAATGAGGACAACACCTTTGAAGGTACGACGC  
TTCAGCTGAACCTGCAGGAGATTCTTCGCCACGCCGAGGTGGAGGATTTTTTTGTTCGGCGAC  
AACACAAAGGCATGGAAGCTACGTTTCGAACCGGATGTCACCATACTGGACGGCATCAAGC  
GGTAATCTCTCTGCTTGACGGCTGGAAGGTTCGATGAAACGGCAAATGGCGTTATCGGCGTG  
GCGGCGGCTACAGACGCCCGTTTCGACCAGCCCGCGTGTATACCTTCGAGCGCGACAAGAC  
CTGCTGGAGCTACAGCGTGGAAATATGACGATTCGGAAGCGGTTCAGCAGGGTCTGCGTCACT  
GCACCAACCCGGAAAAACGTTTTATGCTACAGCTCCAGAAGCAAATGGTGGGTTTCAGCC  
GTCCACCGCACGACTTACGTCACAGCCGCCGACGGTGCAACGCTTGCCGAGATAACGGCTA  
TGGCCGAGGAGTTGGCGCAGACCATCGCCATATCCGGCAGGCAGGAGAGCTTCGTCCGCAT  
CTTCACGCCCCAGCTCACCATCGGGGACGAGGTGCACATTGTCAGCGAGGGCAAAAACCGAA  
ACCATCGGTACTGTCACGGATGTTACGCACAATTTTCGGCAGGGGGCGTTTTCTATACGGCGTT  
CACCGTGGATAGCGGCGGACGAAAAGGCAAAGCGCGTCTTTCAGATTTGATCGGCAAAGCA  
TCCGAAAAGTCCAATCTGAACGGCGTGACAATTTATTAAGGGAGGAATTTATTATGAAAGA  
AATTTGGACATGGATTCAACTTTTGTCTGCTGCTATCGGTGGCTGGCTCGGTTGGTTTTCTCGG  
AGGAGCTGACGGCTTTCTCTATGCGCTCATCGCATTGTGGTTATCGACTATATTACGGCGT  
GATGTGCGCCATCGTAGACCACAAGTTATCCAGCGAGGTTCGGCTTCAAGGGCATCTGTAAAA  
AGGTGCTCGTTTTTATGATGGTTCGGTATCGGAAACATCATCGACGTCCAAGTACTGGGGCAG  
GCTGGGGTGTGCGTACTGCGGTATCTTCTTTTATCTATCCAATGAGGGCGTGTTCGATGCTT  
GAAAATGCCGGACATTTGGGGTGCCTATTCGGCGAAGCTTAAAGAGGTACTTGAACAATT  
ACACGATAGGTCTGGCAAGGAGGATAATTAATGAACCTGCACAACTCATTCTGACCAAC  
AACGCCTGCTACAAGGCTGGCAGAACCATCACGCCGAAGGGCATCATGGTGCATTCTACCG  
GGGTGAATAATCCCAATCTGAAACGCTATGTTCGGTCCCGACGACGGGTTGTTGGGAAAAAA  
CCAGTATAACAATCACTGGAATCAGGACAAGCCGGATGGTCGACAGGTCTGCATCCACGGC  
TTCATAGGCAAGCTGGCTGACGGAACGATAGCTACTTACCAGACACTGCCGTGGAATATGCG  
CGGCTGGCACTGTGGCAGCGGTTCAAAGGCTCCGGGAACGATACGCATATCGGCTTTGAA  
ATCTGCGAGGACGGTCTGACCGACGCCTCGTATTTTTCTGCCGTTTACAAGGAAGCCGTGGA  
GCTTTGCGTGTATCTCTGCAATCTGTACAACCTTACCGAAAAGGACGTTATTTGTCACTCGGA  
AGGATATAAGCAGGGCGTTGCCAGCAACCACGGCGATGTAATGCACTGGTTCCCGAAACAC  
GGCAAGAGCATGGATACCTTCCGCGCCGAGGTTCGGAAAGCTGCTTGTTCATCCGCTCCCGC  
TACCGAGCCTGCACCGACCACAAAAAACGCTCTACCGTGTTCAAATCGGGGCGTATTCTG  
TCAAAGCGAATGCCGACGCTATGCTCTCCAAAATCAAGGCGGCGGGCTTACCGACGCTTTC  
ATCAAACTGAATAGTTTCGCACGTTTCGGTTGCCAACTGACCCCTCGCTGTCTGTGGATGG  
TGAGGGGTTTATTCTTTTCCCTCCGAACGGAGGTAACCCAATGACCAGTACGCAAAAACAG  
CGAATCAAATACTTACGCGCAAGGGCGAAAGCTATGCCGCTGTCGCCGACGCGCTCGGCA  
TTTCGGAGAATAACCGTCAAGTCTACTGCCGCCGGAACAACCTTGGCACGGGATTCATCGCC  
GAACAAATTCAGCCCATAAACGATACCTGTGCCAACTGCGGACGGCCGCTGACACATATGC  
CCGGTGCAAAGAAAAAGCGGTTCTGCTCCGACAAATGCCGTATGGTGTGGTGGGCAAAGCA

CCCCGAAGCCGTGAACCGAAAGGCAGTCTACTACTTTGTCTGTCCAACCTGCGGGCGTGGAAT  
TCGCCGCTACGGTAATGCCAAGCGCAAATACTGCTCCCGTGCCTGTTTCGGACTTTCGAGG  
AGGGCTACCGATGAGTAAGGAAGAGGCAATTCTCCACTATAAAGCGTCAATGTCCGTGTTCA  
AAAAATGGCTTGACGACGGTGTATCACCCTGGCTGATCTGCAGTCAATTAACACAATGCTC  
ATCAAGAAATACGGTTTATCATCGTGCAGCATATTCCTCGAAAATGACTTGCTATGTAAGGA  
AAACAGAGTGATATATGGTGTGTGAAAGGAGGCCGTTATGAGCAGAAAGATAACCAAAAT  
TGAACGACGGCGGAGTTGCCGTCCAGACAGAGGGTCGTAGCCTACGCCCGGTTTCCTGCG  
GCAAGGACGAAATGCTACACTCCCTTGCCGCTCAGGTCAGCTTTTACAGCAACCTGATACAG  
AGCAATCCTGAGTGGGAGTACGTCCGGCGTGTATGCAGATGAAGCGGAAACCGGTACAAAGG  
ATCAAGACCTGAATTTTCAGCGACTGATTGCGGATTGTCCGGGCGGGGTGTATCGACCTCGTC  
CTCACAAAATCAATCAGCCGTTTTGCAAGGAACACTATTACGCTGCTGGCAACCGTCCGAGA  
ACTAAAAGACCTTGGCGTCCGGTGTGTCTTTTGAGGAGCAGAACCTGCACTCGCTTTCGGGTG  
ACGGGGAGTTAATGCTTACCATCCTCGCAAGCTACGCACAGGAAGAGAGCCGTTCCGGTCAG  
TGAAAACCGAAATGGCGAATACATAAAAACCTATTCCGAGGGAAAACCTCAAATAATATC  
CGCATTTACGGCTATGCGTACAGTAAAGGCAAGCTGACCATTATCCCCAAAGAAGCAGAGG  
TCGTGCGGATGATATTCGCCGACTACATTTCCGGGAATGGGTAAAAACGCCATTATGAAAAAG  
TTGACGAGACTCGGCATACCCACAAAGTGCGGCGGTCCGGTGGTCCGAAAGCACGGTAGGCA  
GTATCCTTACTAACGAGAAGTTCATCGGCGATACGTGCCTGCAAAGGGTTTCATAGCCGAC  
CACATCACAAACACTGGAAACCAACAGCGGTGAACTGCCAAAATACTATGTGAGGGTT  
CTCACGAGGCGATAATTGACAGAGAGACTTTTCGAGGCGGTTTCAGGCTGAAATGACGCGGCG  
GGCGGCGAAAGCAAACCACCCCGGAAAAGCACATTCAGTGAGTTTTTCAGGGGCTGATTACC  
TGCGGACAGTGCGGCGCGAAGTTCCGCAAGAAAATAAACGGCATCCGGCACAAAGTACGCCA  
AGGCGACATGGGCTTGCGCGACCTTTACCTATCGTGGCAAAGACCAGTGCGGGGCGAAGCG  
GATACCCGAAGACATCCTCAAAGCGAAATGCGCCGAGGCTCTGGGGGTTACGAATATGAC  
GCGGAGAAGCTCAAAGCTAAAGTTGCCGTATCGCAGTCCAGATGACGGTGTTCCTGTTTT  
CACTTTTAAGGATGGTACGGGGCGGACACTAACTTGGGAGAACCCTTCCAGACGCAATAGC  
TGGACGGACGAGATGAAAGCCCGCCGCAAGGGAAAAAGTAAAGGAGGGACACGCCAATGGC  
AAATGTTAGGGTGATACCCGCCACCGCCCCTATCGTATCGGCGCAAGCGACAAATGCTACCT  
GCAAGCGACGGGTTGCGGCATACGCGAGGGTTTCAACGGATAGCGAAGAGCAGTTGACCTC  
ATATGAGGCGCAGGTTGACTACTACACCAAATTCATTAACAACCGCTCCGAATGGGAATTCA  
TAACCGTGTATACGGATGAAGGCATCTCGGCGGTGAACACGAAAAAACGTGAGGGCTTTAA  
ACAGATGGTCGCCGACGGGATGGCGGGCAAGTTCGATTTGCTCGTCACAAAGAGCGTCAGC  
CGTTTCGCCCCGTAATACGGTGCACAGTCTCACAACCGTACGCAAACCTCAAGGAAAAAGGTG  
TCGAGGTCTGGTTCGAGAAGGAAAACATCTACACGCTGGACAGCAAGGGCGAGTTGCTTAT  
TACAATAATGTCAAGCCTCGCACAGGAAGAGAGCCGCTCTATTTTCGGAGAATGTGACTTGGG  
GGCAACGCAAGCGTATGGCTGACGGCAAGATTACGCTTCCATATAAACAATTCCTCGGCTAC  
TGCAAGGGCGAGGACGGCTTGCCGACAGATAGTGCCGGAAGAAGCTGAGGTTGTTCCGGCTTA  
TATTCAGGCTTTTTATGGAGGGTAAGACCTACTCGGCAATCGCAAAGCACCTCGTCAAGTAT  
GGTTTTCCAACACCTGCCGTAAGGACAATTGGCAGGCTTGCGTGGTGCAGTCCATACTTAC  
CAACGAAAAATATAAAGGTCATGCCCTTATGCAAAGACATACTGCGCCTTCTCCTACTA  
AGAAAATGGTTAAGAACACGGGACAGGTTTCAGCAATATTATGTGAGGACAGCCATCCCCG  
TATCGTCGACCCTGACGAGTGGGAAGCTGTTTCAGGCGGAGATTATTCGTGCAAAGAAGCTCG  
GCAGTATCGGTCCGGTGCGGTAGTCCCTTTTCGGGCAAATCGTCTGCGGTGAGTGCGGCGGA  
TGGTACGGCAAAGGTATGGGGCAGCTACAGGTTTCGATAAGACCTATCGTCGAGAGGTTT  
ACCGATGCAACGACAAATATAAAGGCGAGCATAAATGCGAAACACCTGTTGTAACGGAGGA  
CGAGGTTAAAGAGCGTTTCCTCACAGCATTCAATACCCTGATGGAAAACCGCGACGGGTTGA  
TTGAGGACTGCCGACTGGCGCAATCAACACTCTGCGACACCACGGCGATTGACACGGAAC

CGCCGA ACTACTGCGAGAGATTGAGGTGGTCGCCGAGCTTTCCCGAAAGGCTATCTACGAA  
AACGCCCCGAACCGCCCAGAGCCAGAACGACTTCAATGAGCGCAACAATGGTTACCTCGAAC  
GCCATCGCAAAGCGATGGAGCAGATCGATATGCTGGAGACGGCAAAACAGGAACGACTCGC  
CAAGTCAAAAACACTCGAAATCTTCATCCGCGACATTGAGAGCCGCCCGCTCGTTATTGCTG  
AGTTTATCGAAGCCTTGTGGTTAGCGGTAATCGACAGGGTTGCAATCGCCACCGACGGCGCA  
ATGACTTTCACATTCCGCAACGGAGCGGAGGTCACCGTATAACATAAACTGAAATTTACGGC  
TCGCCTTCGGGCGGGCTGTTTTTGTTTAACTTATCTTTTAAACGGCGGTATTCATCGTTAAAAG  
ATACCCCATAAAAGGGGTGCAAATTTTAAACGATTTACTTTCTTTTAAACGTTTTTCTCTTGTGA  
CAACTCCAAAAACTGCCACGGTTCAAGTCAAGCGTCTCCGAATATGCCTCTGGAAACTGCC  
AACTTTTGATACAAGATAAAACGCCAAAAAGCAAGAAAGCCAGTATTGCTGGACTTTCAG  
GCAAAACAAAAACCACCTACCGACAAAATTTCTTTTATCAATAGATGGTATTTGATTTGGTG  
GAGCTGAGGGGATTCGAACCCCTGACCTCCTTGC AAAAGGAGGGCGCTCTCCCGACTAAGC  
TACAGCCCCACGGAGCACCATTATACCAAGTTTGAGTGAAAGTGTTAAATCGGGGGGGCGT  
AGCTGAATTTTTGAAGCAGCAGGTGTTTTAGATGAGGTACGGCATCAGTTGCCCCAGCTCT  
CCCCGCAAGACTATTTCCGGGGCTTTCAGGAAATCGCCTGGACCTATTCCTGAGAGGTCAGG  
CTCAATGGCAATATCGGCGGCCAGCAGATTTTCTGAGCCATATGTATTGACATAATATTTA  
CTATCTGGAAGGCTGTATCAAAGACTGAGGGTTCCGAATCTCTGTTTTGTTTTATATAATCAT  
GGCGGTA AATGGCATT TACCGCAATTACAAAATCTGCCCCATGTCACGTACAATCTGAGCT  
GGAATAGGGGTAATAATGCCGCCATCCACCAGAAAACGGTTTTTTGTTTTTACC GGACGGAA  
AATAATGGGCAGGGACATGCTGGCAATTACTCCGTCAATAACAGGACCCTCGTTAAAGATA  
ACTTCTTCGCCGGTTTTAACGTCTGCGGCTACGCAGGCAAAGGGTTTTCTTGAGTTCGGCAA  
GGTGATGTCTCCGATAAGCTCTTTTAAATAACTTTTTATCTTTTCGGGACGATAGGAAACGGC  
TCTGGGGGCGGCCAAATCCAGAAGGGGCATAAGCTGTTTCCA ACTCAGGTTATGTACTATTT  
CTTTCATTTCTGCGGTTTATGACCACTGGCATATAGAGCGCCTATAATGGCACCCATACTGG  
TTCCGGTGACCAAATCCAGCGGTAAGCCTTCTTTTTCCAGTACTTCAAGCACGCCGATATGG  
ATGATGCCTCTGGCAGCGCCTCCACCCAAGGCAATGCCTATTTTAGGCACTTTGGATTTGGG  
CATGAATAACCTCCTCAGTTAGCGGGATATAACGCGCCGGGTTTTGTTCCCATTTCTCTGA  
GCAGTGACATAAACCAGACATCCGTCCATGTTCCCTGACCAGTATATCCCGGCGCAGGGTT  
CCGTCAAGCTGGAAGCCGTTTTTCTCAAAGTGCGGCGTGATGGCTGGTTTTCCCTTAAAAC  
TCCGCCGAAAATACGCTCTGCTTTAAGGTGTTTGAAGGCAAAGTGAACACTTAAGCGTATGG  
CTTCTGT CATATAGCCTTTAGTCCAGTATTTGTGCCCCAGCCAGTATCCGATAAGGGCTTGCT  
CTTTATAGCCGATAAGTCTGAAAGCCAGACTGCCTATCAGGCCGGGTTTATCCACTCTTTCA  
ATGGCAAAGAGTAGCGATGACCTGTTTCAAAGTCCGGCTGCTTCGTCCTGATATGCCAAGCG  
GAGTTCATTTATGGTTTTTCGGGCCATCCACATCAGGTAGCGGGTTACCTCGGGGTCTTTAAT  
CAGGCTGAAGGCTTTATAGGCATCGGCGGCTTGAATTATTCGCAGCCTTAGGTTCTGGCTTTC  
TACA ACTGCCTGCTTAAACCCCTGTCCATTCTGTCGCTCAAATATATCTGGCATATGTCTAGA  
AAAGCTCCTCTATTTCTTCGGAGCTGATTTTTTTCTGGCTGACTTCGTTATAGATATTTTGGTC  
GTA CTGCGGGGGACAAAGGCTACCGGCATGGGTACTGCCGCACCGAATATCAGGGCTTGC  
TGGCGTGAAGCCAGTTTGGCAAGGACGCCTTTGAGTTCGTTTTTACCGGAAACGCCTGAGAG  
TACGGCGTCTATATCTTTTTCGTTGTCCAGCAGGGCGGTTATTTAGTGCCTAACTGGGACAT  
CACTTCAGGGTCTATGCCGAAGGCCGCTGGTCTATGATAAGCAGGGTGACATTGTATTTAC  
GCATTTACGGGCAATAGTGCCGAAGATAGTGCGGGAAGCCACTTCCGGGTTTAAAAATTTA  
TGGGCTTCTCTATGGTAATAACCAGCGGGGTGGGTTTTGGAGGCATCTTCGGCCATGGCTTG  
TTCCATGTGGTCACGGTAGCTGGTATATATGCGGCGGGTAAGCAGATTGGCTACCAGTATGT  
AGGCGGTGATGTCTGTATACCGCCCGAATTCAGTACTACGTTTATATTCCGGTTTAGGTATT  
CAAGCACCCCTGTCTACTGCCTTGACCGGGGCATTTTCTACGATAAAGGGCAGGCGGGTAAGG  
GTATTAAGCCCCCTCCGCAGGTTCTGGAAAGTGCTTTCATGGATACTTAAAGTGTCCAGCAG

TTTTTATCTTCTTCTTCGTCTCCAATATTATTGGCTTCTTTTATCCAGTTTTTCTTGAAGTGCT  
TGCGTAGCTGGTAAACGGCTTCTACCGCCTGTTTCGGTCAGATTAAGGGTCTGGCGGAGCAGG  
CTGATATCTTCCGGCTCTATTTTCGTCTGAGCCTATCTTTACCTCAAAGTCCACGCTGACTTTG  
CGTTTGCGGGAGCTTTCCCATCTAAAGTAAATACGGCTACCCTGTCCGAAAGAGCTGTTT  
TAGGGCTTTAACTTTGTGTTTTTCTCACTGGTGCCTTCCAGCCGTATTCGGAGTGCATATC  
AAACACCAGATTTACGCAAGACCCTTTCTGAAGCATGCCGACCAGCAGGGTGCGGGTGAGG  
AATGTTTTGCCGGTGCCGCTTTTACCGAAGATGCCGTTTGAACGTTTGAACAGCTCAGGCAG  
GTTTAGGCAGAGGGCGGGTTTCCATGTCCAGCGGGTTACCCACATAAAAATGGGTGGCGTCTT  
CCTTGCCGAATACCATCTCTATATCTTTCGTTGGAGGCAATATCTACCGGGGCATAGTGGCTG  
GGTATGGTCTTGACCGGCTGAGGGCCATCCAGAAGGCTTTTTTCATCATTGCCAGTACCAG  
ATAGGGTATAACCTTCAGATCTCCGTAAGCGGCTGTACCGCTGAGTATTTCCGGCCAGAAATT  
TTTCGTCTGAGGCAGGAGGGGTGAGCATAAGGCGCTGGTCTGTTACTCCCAGAGAAACATCG  
GTTATCATGCCAGAAAGCGTTTTGGTTTTGCCTTGAATGGTGACATAACGCCAACCGCCAT  
ATCTTCTACCAAGTTTTACCGTTCAGGCGGACATCTACCCCGCCGAAAGTGAACCCCTA  
TTACAATACCCAGTTTGTTTTTCAGTTGTATAGCTGTATCCTCTCCAGGATTACTTTAAGCCG  
CTGGTACTGCCCTGGCAGGAGTTTGGCCAGCTCTTTGCCCGCTTTTACCAGAAAGGCTTGCTT  
GTCCGGGGCGGGCGGGGATAAGTGCCGCAGGCAGGCGGGCGGTGACTTCGTCCGGGGGGACG  
GGCAGTTCGGAGTTTACCAGTATATTTAAAAAGCCGAATGATTTACAAAATTCAGCCGTTTC  
TTCCGGGGTGCAACTTTCCGCAAAGCTGTGAATATGGGCAGGGCGGGGTGGCAGGTAATGC  
AGGATTTGCCCTTGTCCTGTGCCCCAGTATCAGGCAGGAGAACTCACTTCGGAGGAGTTT  
ACTTAGCTGGGGGCTTTGGGCATAGATAGCCTCTTCGCTGACTGCGTCTGTCCGCGGGCAA  
TGGGTTTTCTGCCCGGCTCTATGGATGAGGTGGTGGCATGATAGACGGCGGGCGTAAATAGTA  
TTTTCGCCTTACCAGTTTTTACCAGTGCCCCAGAGCGGGCGTGTGTAAAGCTGGTAACAC  
TGGGCGGTAAAGTCAGTGGTGCTGGTATCTATAACCTCGCCTATGCGGCTTGTACTTAGGTT  
GTCCAATTTCTCACCCCTGCGGTTAATGGTGTATTTATATTTGCCAAATAGACTAACGGACT  
AGTTTACATAAACTATACCCAGCGGGTTTTTTTGCTCAGGCTCTTGGCGGAACTGCTGGGATT  
TATCTGGCTTGCGGTCAGCATTTCCTCTACCAGCTGGTTGAAAATACGCCTGTCTTGACCGCT  
GACTACTGCCTGTTTCGTGGGCTTCGGAAAGAGATACGGGGTAGCCGTGTCCAGACGGCACT  
GTTCCAGTATCAGGCTGTGGCTCAGGTTTAAACAGCTCTGCGCAGTGTACTGTCCAGGCGGGC  
AGTTCCACTCTGGCTATTTCTCACTGGTTTTTTCAGGTAGTAAAAATATACATGGTGTCTCCG  
TAATATTTTTCCAGTATGGAAGATGAGCTGGCAAACAGGGCGGAACGTTTACCCGGTTTCAG  
TATACGGTCAAAAAGCATGCTGTCTGTGATGCCTGAGAGTATGTCACAAGGGCGTTTGCCGT  
TGGCAAGCTGGTCACATTTGCTTATGCAGTTTGCCGGTTCGTACGGGCAGTAAAGCAGGCGG  
AGGGTATTAACCACATCTGTGCTTCTGGGGTAACTGATATAGCTGGCCAGAGCCACTTGTCT  
GTCTTTTGTATTCAGGTTTTTTATTTGCTCCAGATATTTTCCAGATAGCCATCCACCAGCAGGTTT  
TCAACCACGTATTCGGGAAACTCTTTGGATAAGAGTGACCAGAGTATCAAAGTGCCGTCTCC  
AAGCGCCAGAGTGGGGAGGCGGGTGCGGTGGCATCTGCCATTTCCGAAAGGTGCCGAGTT  
TCCTCTACGCTTCTTTTTATGCCAGCAGAGTCCCTTCCACTGCCAGTTCTTTGCTTCCGCAGG  
AGATTACCATATCTTCGGGGCGGGCATAACAGGACAGGCAGGCTTTCCAAGCTGGCAGACGG  
GGCTTTGCCGTATTCAGTTGTACCCTGCCTATATTTATAAGGTAACAGCGGCTGAGCTGGTG  
GCGGTCTACGTCTATTTGTGAGCCGTCTGTAGCTAGTATGCGGTAACCTTTGGGGCAAGACAG  
GCGGCTGGTGAACGGCATTGGGTATTTCTGCAGGCCGTGCTAAGAGAAAGGTGGTCTTGCTG  
CGTTCTACTTTGTCCAGCAGGCGCTGGTATTCAGCCGGAGTCCGCGCCATGCCGTCCAGACA  
GGCTTGAAGATGTTTTTGTATGTTCCAGATCACGGCCTTTTTCAGCTCTGAGACCATGTCCTGTAT  
TTGAAGGGCGGTTTTGTCCAGGTTTAAAGACAATACCGTTATCTCCTTGTCTTCTGCATTTGTT  
TCAGTATAAATCAAGATA
