# Supplementary material
Source: PubMed Central journal article supplement (PMC6299113)
Supplement: 41396_2018_254_MOESM5_ESM.pdf [file 41396_2018_254_MOESM5_ESM.pdf]

>PCR1\_seq-T3-1348-1f

TAATTRAATTTYGGMACCCMATTTGTTTTTAAGARTAWARGAWGKKATGAGARGSGCCW  
WCWGAMTTTTCKGGTCYYAAKGGTATTTWKGACTGGAGTTGCCAGWGTAACATGKTTTT  
CAYACTCARARTGRTTTTTGGSMTTTWATKRKMTTTTTTTWTGRTRTTTTTGACAKAAKCCCY  
AATATYTAATA

>PCR1\_vcrA circular GI 1f

GAGACWCCGMCTCCCAAARKKCTTTAGAAKTKYYTWTGTTTAWGGAYTTGCTTGTCTMGTT  
KTYACCKATMAAAATTKCCSKTCMARGTRWTCTTCRTGATGTGWCMGWSTGTCYTTSTTAC  
TCCCATCARMTATTACASYCSKTTCTTTKGATMTAAAYWWWMWTTKTSWKATAK GKTRCY  
GGRTRAAAAGKTWTRGTTTTAMGGGGTACCTGATTTTATTTATTA

>PCR1\_vcrA circular GI 1f

TTTTGTTTTTWAAGAMTAYRAGRTGWWRWGAGMGGCCCCWKCTGAGTTTTCTGTTGWYAR  
TGKTCTTTGTGTCATGCKGTTTTGYGAARKGAAACATTCMAAGGTAGGCATARTKCGRGA  
WGAGTAAAATARGGAWTTCATGATCTTACWGACCTGAAWCATTAMTCWMAATTAAGTCW  
CATGMTGAYAGGTTSWAATTYAAATKACGTTTRCTTCGCAYGTAWWGARWAGAGACAWMS  
TWTKGGTWKCWGGRGTTCTGATTTTAATTAWTACWWGGATA

>PCR1\_seq-T3-1348-1f

CTTAATAACTCTAACTGATCATTAAASCTTTTCAACTTTGTCTGTTATCGATACCTGGYGTAG  
ATTACGGCTCTMACTATTCTTCCWCAAACCCCTTAATTTCAATTTCAAGTCTCTCTTCTTCAT  
CARTTAAATCAAAGACTTCCTTAAGGCGGKCAAGAARYGTAAGTACCTGGTATTCAAATCT  
TCATAAGTTTTCAAGGGAGTCCTCAWGTCTATCTGCCATTTCTTACATTCGGMTTCRGCTGY  
CTTGSAGATTCTCTCCAGTTCACTTACGTTAAGTACGTATCTAACCTTGCCGTGTGAAACTAC  
TGATTTGATGCCGATAGCGCAWAAAGCCTGCYCTACATTGGAGGGTGTATATCCATATCAA  
ATTCCTTTTTCTCTCTTGCCGATATCTCTCCGGCAGAAGCCCTGGKTGTCCCTTCRAGCGCYA  
TAACATAGGYAGTTTGAAAACTGCTAAGATATTCCTTGCTCTCATATTTCTTGTCTTTTT  
CCARWGTCTCCCTCATATCATCTTTCAWTTTCCAGTTCCTCCTTTCCCCTG

>PCR1\_seq-T1-1572r

GTTGGGAGTASTGCGAAGYAGAGATASAATASGCTGTGYKRKAWWGATGKCCMGWAWTAC  
TTCATAWKWCCTWGGMAAGGYGGTWTTYAGAKTCYTTMTKCCGGMGCTCTTCCTYCWAA  
ASRACTTCTCTCTCCRACTGWWTATTTGGASYAATGWTRYSGGKTTTCRTAYCCRAYRGAW  
CMAKWAWCTACCMYATGCCAAMRGAGAATTAKTCYWSSGGCCAAGATTWTTTACCACTR  
CCTCRGWCWGTMATATTGTGYAAMTGCCCTTCTRTCCCGAGCWSATMAWCCACCGGGATG  
AAMTCCTAKSCGGTGCCMTGAACCTTGATCMGCCTGGAMCTGTTTGATTCKGYCCWWKT  
GGCCTTACAGAAGAACTCAKGCAGATCTGAAACCCTGACTACGWTMCTAATAGAGAATACC  
TGCTTAAAGGATTGRTCAGATGCGCCTATKCGGAMTGCCCATRWGGRYTCAKACTTRTWY  
YGTGGAAAMRGCTATYACCGGGAGCRTARGCCTCWMGGASRATACMSGAGTGCCTTGKA  
CATGKCGGTACTATAGCCTGCCWTGTGMTWGATAATCRKATAASAKAACTMSYTTCSRCYA  
TMKAKCTTWGACCKWGCTGSSTGWAGAKSTACTTKCWMTCAWAAGCCTTMASGATGAAG  
TGKAAAGAGTMCAMTGGA AAAAGAKCAGGTTATMGSTAAKCTCCMCCGCATGYCATAGAT  
CTATWTASACGGTCTGATACCTGAKGA AKAATA YTTAAGGCAKAMWWGACKTCTGGA  
CGTCTGRRAWCWCTGGTTGTAMCTGATMTGATGYCTCTGAGCAKGCCKSKKAWACTCWT

CSAGAATCTGYCTGTACTCTGKASCRMAGGCMASCTTRCTGAA YMGAGAAAGATACCCTGA  
CYATGMTGGTC

>PCR1\_seq-T3-1348-1f

TGGGTCTCTTTGRAAGWKACWYCATCCWGCCACGCATCMKAAACTGACTTTACTCCAWSTC  
CCCATTCTCTAAAYTTYCCAAAGAGAWGGASAYWTGGGTA ACTGAATAAAAGGYTCTGTC  
CATGCTCTGAATAATCWSYACATCAAAAYGTTTGTTAATTGCGTCTTCCARCARCCTCTGYM  
AGTCTTWTCKTTGTCTTAASTWATCWGCWTGTGCCTGATSASAGTWTTMCTKATARAYYTT  
CCAAMGCCTTTCTTTGACAAAGYGSCTTAATAACTCTAACTGATCATTAAASCTTTTCAACTTT  
GTCTGTTATCGATACCCTGGYGTAGATTACGGCTCTMACTATTCTTCCWCAA AACCCCTTAA  
TTTCATTTCAAGTCTCTCTTCTTCATCARTTAAATCAAAGACTTCCTTAAGGCGGKCAAGAAR  
YGTAAGTACCCTGGTATTCAAATCTTCATAAGTTTCAAGGGAGTCCTCAWGTCTATCTGCCA  
TTTCTTCACATTCGGMTTCRGCTGYCTTGSAGATTCTCTCCAGTTCACTTACGTAAAGTACGT  
ATCTAACCTTGCCGTGTGAAACTACTGATTTGATGCCGATAGCGCAWAAAGCCTGCYCTACA  
TTGGAGGGGTGTTATATCCATATCAAATTCCTTTTTCTCTCTTGCCGATATCTCTCCGGCAGAA  
GCCCTGGKTGTCCCTTCRAGCGCYATAACATAGGYAGTTTGAAAAACTGCTAAGATATTCCT  
TGCTCTCATCATTTCTCTTGCTTTTTCCARWGTCTCCCTCATATCATCTTTCAWTTTCCAGTTC  
CTCCTTTCCCTGTTGTACAACAAYATACATATGTTTTTCCGATTTAAGAGCCCTCACCACCC  
TCGCTACYCTTTCTAGCTAAACCCTTCTCTGCTATCACCTTGGCGATATAGWCCTGGTCCSAT  
ATAAGGSTCTAAAATGCCTGCCATKCCTCAGGCAAACCAGCAGATAAAAGGCTTGTGGAAC  
CTTCWTCCTTGCCATGCGTACAGATATGGCTTGTACATATCGGGYACTTACGTC

>PCR2-GI\_vcrA670f

GTCAGGTGAAGAGCAAAAGAAGCGAATTTTGGCCGCTAAAAAAGAGAGGTTCCCTGGTTGG  
GACGGTGGGTACACGGGAGAGGGGATCAGCGGGCGGATGCACTATTTTACGCAGTAACTC  
AACCATTTCCTGGTAGTGGTGAGGAAGGGCACGACTATTCCAACCTTATCCTGATCAACCC  
GGTAAGTTTTAC

>PCR2-GI\_10426r

GTGGGTACTTGGMATATTGGGGSTGTTACTAGCTTTGWTTGCTATTCAACACACATATGSCA  
GKGSTACRTATGAATTTGAATATACGKCAGCATGGMTAGTGGGCGTCATAGYGWATTGTT  
AGCTGTMGTACCGTTGTTATTTGCGGCCAGATCAGWAAGACGCASGGGAGRCMAATAACGG  
GTATCTTTAAGTAGATAAAGGKAGTAAGTCGCTTGGSGTTGCACGCTTARTAAAGMATCAAGA  
GCTATTTCATAAAAAGTTWACCCCCGAGTTGTATTACCCGTGGCAACTCKGGGGATTATAGTT  
TTCTTTTATGTGCRMATATAACGMGAAA AKGGATACRYATAGACAGTGAAGAAGTTTATTA  
TTGCAATTATTGCGCTTGKCTTATTGGGCGCCGSSMTATATGGAAATACCGGCGGCGATCAA  
GATATTGATGCGTATCTAGCTGAGSTTTACCTGA

>PCR2-GI\_10426r

TGGACTAACTATGCTATTTACCTGGYTAAARAGAATAATATCACTTTAAAGKGGAAATGRGT  
GGGTA CTTGGMATATTGSGGCTGTTACKAGCTTTGWTTGCTATTCAACACACATATGCCAGY  
GCTACATATGARWTYGAATATACGWCAGCMTGSATAGKGGGCGTCATAGTGTATTGTTAG  
CTGTAGTACCGTTGTTATTTGCGGCAAGATCAGTRAGACGCAGGGTAGACAAATAACGGGTA  
TCTTTAAGTAGATAAGGYAGTAAGTCGCTTGGGTTGCACGCTTAAATAAAGCAATCAAGAGCT  
ATTTACATAAAAAGTTAACCCCCGAGTTGTATTACCCGTGGCAACTCGGGGGATTATAGTTTTCT

TTTATGTGCAAATATAACGAGAAAATGGATACAAATAGAYAGTGAAGAAGTTTAKTATTGC  
AATTATTGCGCTGGTCTTATTGRGCGCCGGCATATATGGAAATACCGGCGGCGATC

>PCR2\_vcrA670f

GATGAGATGTCAGGTGAAGAGCAAAAGAAGCGAATTTTGGCCGCTAAAAAAGAGAGGTTCC  
CTGGTTGGGACGGTGGGTACACGGGAGAGGGGATCAGCGGGCGGATGCACTATTTTACGC  
AGWAACTCAACCATTTCTGCTAGTGGTGAGGAAGGGCACGGACTATTCCAACCTTATCCTG  
ATCAACCCGGTAAGTTTTACCAGAATAATATCRCTTTAAAGTGGAATGAGTGGGTACTTGGC  
ATATTGGGGCTGTTACTAGCTTTGTTTGCTATTCAACACACATATGCCAGTGCTACATATGAA  
TTTGAATATACGTCAGCATGGATAGTGGGCGTCATAGTGTTATTGTTAGCTGTAGTACCGTTG  
TTATTTGCGGCAAGATCAGTAAGACGCAGGGTAGACAAATAACGGGTATCTTTAAGTAGAT  
AAGGTAGTAAGTCGCTTGGGTTGCACGCTTAATAAAGCAATCAAGAGCTATTTTCATAARAGT  
TAACCCCGGAGTTGTATTACCCGTGGCAACTCGGGGGATTATAGTTTTCTTTTATGTGCAAAT  
ATAACGAGAAAATGGATACAAATAGACAGTGAAGAAGTTTATTATTGCAATTATTGCGCTGR  
TCTTATTGSGCGCCGGCATATATGGAAATACCGGCGGCGATCAAGATATTGATGCGYATCTA  
GCTGAAGCTTTAMCTGAAGMGMAGAGTTTCTCTTTTGCTTGAAGGTTCGAACG

>PCR2-GI\_10426r

ACAAATAACGGGTATCTTTAAGTAGATWAGGYAGTAAGTCGCTTGGGTTGCACGCTTAATA  
AAGCAATCAAGAGCTATTTTCATAMAAGTWAACCYCCGAGTTGTATTACCCGYGGCAACTCG  
GGGGATTATAGYTTTTCTTTTATGTGCAAATATAACGAGAAAATGGATACAWWTAGACAGTG  
AAGAAGTTTATTATTGCAATTATTGCGCTG

>PCR2-GI\_10426r

ATTCAACACACATATGCCAGTGCTACATATGAAWTTGAATATACGKCAGCATGSATAGTGG  
GCGTCATAGTGTTATTGTYAGCTGTAGTACCGTTGTTATTTGCGGCAAGATCAGTAASACGC  
AGGGTAGACAAATAACGGGTATCTTTAAGTAGATRAGGYAGTAAGTCGCTTGGGTTGCACG  
CTTAATAAAGCAATCAAGAGCTATTTTCATAAMAGTTAACCCCGGAGTTGTATTACCCGTGGC  
AACTCGSGGGATTATAGTTTTCTTTTATGTGCAAATATAACGAGAMAATGGATACWAATAG  
AYAGTGAAGAAGTTTATTATTGCAATTATTGCGCTGGTCTTATTGRGCGCCGGCATATATGG  
AAMTACCGGCGGCGATCWAGATATTGATGYGYATCTAGCTGAAGCTTTACCTGAAGCRCAA  
GAGTTTTCTCTTTTGCTTGAAGGTTCGAACGGGGACA ACTATTTATMTGGCGGATATGATGC  
TRATATATTAGGYTATGTTGCTGTATCAGAAGGCTATGGTTATGGTGGCCCTCTTACGGTTGT  
TACAACCTATAGTACAGATGGCACAATCGCWGCATAACCGTTCTAAAAACAAAGAGAGTG  
AAGTTTGGTTTGATACCCTCTATCAATACGATTCTTTG
