# Supplementary material
Source: PubMed Central journal article supplement (PMC6299113)
Supplement: 41396_2018_254_MOESM6_ESM.pdf [file 41396_2018_254_MOESM6_ESM.pdf]

>Dmc\_IME1-1

GTTTCAATCTTTTGGTTACTTCAATTATGACAGCAATAGCCTGGCATTCTTTAACAGAGTGAG  
TGCCTTGCCCATTTTTCAGGATACATTTCGCCGTTTTGCTCTATAATTTTTGCCACTCGGAGTTC  
GTCGTCGATAAGACACAGTACAATGTCCCCCACCTCAGGAACCATATCCCTGTCTACAACAA  
CAATATCACCATTCTCAATCTTGGGCTCCATACACTTACCCTTAACGATATATGATTCTATAT  
TATGCCGTGGTGCCTCACGTACACGTGTCCGGTAAATGTATTCAACTGGAGCAAACCCACTA  
TCCCCTGCGTGCGCCCTAAATTCAGTATAAACAGGTATGCTCATGGGAGTAGCCAGCCGTAA  
CCGTTCTAGTATCTCTTCAGGACTCTCTGGGCGTGATAATGGTATTGTGGAAGTTGGATTGTG  
AATACCCATAGATCTATATAAGTCATCCACATTTATGTTAAATGCCGACGCAAGTTTTACTA  
ACTTATCCACCCCTGGAGTAATTCTCCTACTAGATTCTAAGGCTTGATAAGTGACCTTGAAA  
GACCTGCTTTATTTGCAAGCTGCTGTTGAGACCAATTCTTCGCATCTCTTAGACTACGTATTT  
TATCCGATAGTTGATTGATTTTCATTCATGTTCAATTTGCCACTATTTTAGCAGGATTTAAGCAA  
AAATAAGAGCCTCAGCGAGATATTTTATAATAAAGTGGCTCTCTTTATTATCCATTGGCTACT  
ATATTATCTATTTGCAGTTGTGTTTTTTGTAGCCCTCGGCTACTATTTTATCCATGAACACATT  
ACTCGAGCAATTGATTACTGAACAACTACTCGTCAAATGAGCGATTATCAATTTGTAAAT  
TTTTAAATTTCCATAGCAACGCTCATGTATCTCGACAACCTTTGGCATCAAACGCGGAATAAG  
CACATACCTTTAGGTTTTTAAAATCCTAAAAGCGACAGTGCAAACATTTCCGGAGCTTGAGAC  
TGCCGCCATCGATTATCTCAAGAAAAATACTAATCATGAGTAAATCTGATTGTGGTAACGCT  
ACCTTGTGAAATACGGTCTTGAGTATTATCAAGCAATTGGCCGATTGGGCGGCAGACCAAA  
AATTAAGCTATCCGATGAAATACAACGCGTACAGCCTCCTTATCTGTATTGGTGAAAGGAG  
AACGGCACGGGGAAGGCCAATCTCTTATGGCACTTAAGAGGCTGTACGCAGAAAGGGGAAT  
GAGGCAATGCCTCAACAACAAGTGACTTATCGTATCAAGAATGAACGCACCCGGTCAATGGT  
GGGAGGGAAAAGCTGATAGCCCGATAGATGCCATGCGGAAAGCCTCCCTCGAATACCCGGT  
AAAAGCCCTAGTACCGGCTGGACAGCTGAAAACCTGCTGGGTACGTCAATGGTGTCTGCTG  
GTTATGGCTCATGGGTAACCCAGACTATGTCCGCAAAAACAACAGAGATGGTGAAAGCATG  
AAATTTCTTTCCACGTGCTTACCGCGTAGCTAAAAAAGAACAGGAGAAATAATATGCCTTATA  
AAAGATATTTCCCGGCCAAGATAGTAAGTTTTGACCCTTATTTTGGAAATGGAACGTGATGGT  
CTTAAGTCATTTATTATCGTCACAGCATTTTCTATGGATGCACCGGGCAATCTATTGTTGGAT  
GAATTTCAGAAGTCAGAAGTCCCTATACTGATAACAATCCATAATCCCCAAACCTGTCAATC  
ATTTAATGCCTACGCAACCAAAGTTGTGCAAAATTTCTCCCGCCCGTTACTGGAATACCATCC  
ATATCGACACAGACCGCATAACGAAGAGCAGAAGAAGCGCAAACAGCTATGGCAGGCTACCC  
CAAAAAGGATGACCTTAATGACTAGTGGAAATGGTTATCTTGGCTGAAATACGTACCGAAACC  
CAGCAAGGCCGTCCCGCCCTACCACGGGCTGGGAATGGACTGCCGGTGATACTCCAAAAA  
CAGACCCTAGCCCAGGTACCTGGTTTTGTGCGGCGCATGGAAGACCGTTTCGTTGTGTTTTTCC  
GCTCTAAACTGACACCTGAACTAAAGGGCAAAGGACCTGAATTCCCAATCCTGACTTTTCCG  
CCTACTGAGGCAGGGGAATATGTAGCCCGTGAAATGGCAATCAAACCTACGTAATGAATCAT  
ACCGACAGGAGGCTGAACGCAATGGTTCGTAGCTACTTCGTCTAAACCGATTGAATTGTCACC  
CCGCCGCTACCGCAAAGGGAATTATATGTTTTGCCAGTAAAAGCCGACCGCAATTACAAAT  
GCCCCGAGTGTGGTTGTCTGGTACAGCCAGGGGAAGTTGGATTTACCCGCTTTAAGATTATT  
CATGATCTGGTAACTGAGCCTGTCTGGGATGTACTGCATGCGTGCTGCGTGGAGGCAAGGGA  
ATGATAAGAATTTAAATTTGGTCATCTAACGCTCTCTGCGGACCTATCTCAATCCGGAGATGT  
AATTATTACCTTGAGGACTGAAGATGGCACACCTGTTGCTGCCGCCAACTCAAAGACACTTA  
TTGCCGCTATTGAGGCACTGGAGAAGACAGCGGAATAACATCCAGGACGGACAGGGGAGTG  
TGATCTCCCTCCCACTTCCCTGTCCGTCCTTAAAAAACACAAAGGAGTGACATATGGTCGTA  
TCAACACTGAGTAAGAGACCAATTCTGCAAACCTACCCTTGTACCCACTGCGGCCCGGGAGAC  
CGAATGGGATTTTGACCTGGGCTCCAATCCACTATGCGCATACTGTTGGGACAACAGTATAG

AAATAACCGTCAAGGTTGAGCTGGCTGATAAGATGCGTGCCTACCGCCAGGAGCATAAAGGT  
TGAGCTGGCTGATAAGATGCGTGCCTACTACCAGGAGCATAAAGGTTGAGCTGGCTGATAAG  
ATGCGTGCCTACTACCAGGAGCATAAAGGTTGAGCTGGCTGATAAGAAGCGTGCCCGTTCCGGC  
TATTTCCAATTAAGTCTGAAATGAGGTCCAATATGGTAATAGCAATACGAAAATATACG  
ATAGACGATATCCTTGCCCGACTTCAGGGCGTCAAAAAGAATGGATCCGGCTACATGGCCTG  
CTGTCCCTGCCCATGAGGATAAAAACCCGAGCTTGTCCATCAGTGAAAAGGACGACAAGGTG  
TACTAAAGTGCTTCGCTGGTTGCACCTATGAGCAGATCATGACCGCGTTGGATATGCCCCG  
ACACGCCGCAGCACAGGATACTACAACCACTCCAAGCAGCAGAAATTAACAATCCAAG  
CCTCTCGGTAATAAGTACAAACATACGATTATACCGATATGAATGGGGCTTTACTGTTCCA  
AGTCGTCAGATACGAGCCAAAGGCTTTAAGCAACGCCGTCCAGATGGGAAAGGTGGCTGG  
AACTATAAACTAGATGGCGTAAATACAGTTCATACCATCTTTACGAACTGTGGACAGGCAT  
CAAAATGGGCCAAACCATCTATATTGCAGAAGGCGAAAAGGATGTTGATAATCTGCGCGGG  
CTTGGTTTGGTAGCTACCTGCAACCCACGCGGAGCTGGGCAATGGAAAGAGGAATATACCC  
AATACCTAGAAGGCGCTCACCAAGTTATCATCATTACTGATAAAGATCTGCCCGGACGAAAA  
CATTCGTCAGAAGTCGCTCTCTTAGTTTATAATGCCGGCATACTGTCAAATAAATTGAAAT  
GCCCCGCGAATTTTCAAGACAGAAAGACGGATACACTGGAATAAAGGACTTTTCCGATTGG  
CTGTACTCTGGGGGAAAGGTCACAGAAGTACTAGAGACATTAGTAAACTAGCAGCTCCTTATGT  
CCCCCTCTGGCCAGGACTCACTACGGCAGATATCTGACAAAACATACTGTATCGAATCAG  
GAAAAATCTGCTGGATTAACAGGAACGTGACGGCAGTATAACTGTACCGTTGTGTAATTTT  
ACGGCCCGTGTTACTGAAGAGATAACCAGGGATGATGGAGTTGAATCGAATAGGTACTTCC  
GCTGTCTTGGAAATGATTGCCACGGACAGGATCTACCAGGCATTGAAGTACCGGCTGCAAA  
TTTTCATCACTGAGTTGGGTGGTTAATGATTGGGGTATGAGGGCAATTATCGGCGCCGGAAT  
GAATGCCAAGGATCGGCTCCGTGAGGCCATACAGTTACTCAGCCAGCAAGCCTTATCAAGA  
CGCATTTATACGCATACTGGTTGGCGCCATTTAGATGGCACTGATGTATACCTGTACAAGG  
TGGGGCCATAGGTTGTGACGATGTAGATGTAGAGCTAGAGCCACAGTTGCAGCGGTATTGCC  
TGCAAAACCAGATGATTCAAACTTCGAGAATCAATCAGGGCATCAATTAATTTTCTCTAT  
ACCGCAGATATGCATATTACCCTGCCTCTTTGGGCAGCCATGTATATGGCTCCATTAGCAGA  
GGCACTTGATCCAGCTTTTACTCTCTGGATGGTAGGACCGTCAGGTAGTTTTAAAGCACCTT  
GACCGCCTTGGTATTAATCATTTTGGAGATTTTGACCAGAACCATCTGCCAGCATCATGGA  
GAGATACCGCAAATCAGCTTGAAAACTACTGTTTCTCTGTAAAGACATGCCATTGGTAATT  
GATGACTGGGCGCCTGGACAGGATAGTGGGAAGGCCCGCAACTCGAAGTAAAAGCAGAA  
CATATAGTACGGGCTCAGGGCAACCGACAAGGACGGGGACGGATGAGATCTGATACGTCAA  
GCAGGCCTAGCTATTTCCCGCGCGGTATGCTGCTGACCTCAGGCGAAATGTTACCCAGTGGG  
CATTACATACAGCCCGTATCTTCACAGTGCAACTTGAAAAGACATGGTTGACCAGAAATT  
ATTAATACTGCCAGCATGAGCGCTACCTATATCGTCAAGCTATGGCTCAATACATCAAGT  
GGTTGCAACCGGGCTGGATGGACAAAAGGACAGCCCTCAAGCGTGAGGCCGAAGAGCTACG  
GAATAGTATATTGGCAGACGTTGAAACCGGATCTATACATGCCCGTTTACCGGATGTTATTG  
CCATGCTCTGTATAGCTTTAAATAAAGGCCTGGATTTTGCCAAGTATTGCGGTGAAGTACTG  
GCCAATGAATACGATTTATTCAAACCGAGGGGCGGCGTATCTTTATCGAAATGGCCTGTGA  
ACAAGGCAACCGTGTTGAAGAACAGCGCCAGGACAGCGAGCAATTGAAGCTATTCAAGCG  
TCTATCCGCATGGGTACCGCAGTATTGCGTAATAAGGCCGATGCATCTTTACAGATCTGAG  
TATGGGTAAAATTGCTATCGGTTGGAGAGATTTCCAAAATGGACATGTTCTACTGGATCCAG  
AGGCGACCTATCAGGCTATTGTCCAACATAGCGAAAAGTCTAAACGCCCATATACCATCACT  
CCCGCAGAAACATGGAAAGATTTGCTTCGTTTGGGATATTCAGAAGAAGGCAGTGACGGGC  
GCCCAACAATAATGGCGCGTATAACGGCTCTCCAAAATCTGTACGAGTAATCAAGCTGAA  
AAACGATGCCATAGGATTAGCAGAAGCGACTCCATTAGAGGAATCATTACTATGAATTTT  
TTGCTGGCAGGGAGGATACCAAAAACTGGAAACATTGAAACATGGCATTCTCAATCGT

GGCTTACGTTGTATCCAGTTACTGGAAACAAGCCCCAAAAATTGGAAACATTGGAAACATAC  
ATAATATTAAACTGGAAACATTTTGGATACACGATTAATCACGAATAAATAAATACTTAAC  
AATAATAATAATGGAAACATTTTGGATACAACGTAAGTTAGCTTTGCTTAAAACACTTTGTT  
TCCATGTTTCCAATAAATAAGGGAGAGTCTTAAATGAAAGTCGCTTTATATGCCAGGGTAAG  
CACCCGAGATAAAAATCAGGATCCGGAAGTCCAGCTCATGGAACCTCCGGAATATTGCCAG  
GATAATTGCATGGAAATTACCAAGGAATATATAGACCAGGCGTCAGCAAATGACTTTATCCA  
TCGCACCGCATGGAAGCAGTTACTGGCAGATGCAGCTGGCAGAAAGTTCAAAGGGTTATTG  
GTTTGGAAACTTGACCGGGCTTTTCGCGATATTACGGTGGCAACCTCATCCGTTAAAATGCT  
GCGCAATGCCGGCATAGATTTTATTGTTACCACTGTCCCAGTTCTTTCAGTCCAAGGTCCAGC  
TGGAGACCTGATGTTTAAACATCTATGCCGCTTTTGCCAGTTTGAAAAAGACACCATTATTG  
AAAGAGTTAATGCTGGACTTTCAAGGGCAAAGGCTAAGGGTAAGACATTCGGTCGCCAAG  
AAAGGCAATAGACTTCAATAAGGTTTTTGGAAAGCCACGAGATAGCCTGCTCACGGGTTAAC  
CGGATTACTAAAGAAAATCAGGGTTATTCCGAGACGGCGAGGATATTGAGCGAGCAGACCG  
GGCTAAGAATTACAGCCGGTTGGGTCTATAACCGGCTTAAGGCCGGCAATTAATAATGCTTCA  
AAAAACCCACCCCATTTTGCATAAAATTTTAAAGCCAAAAATCTTATCGGATGGGAGGCTT  
CAAAAAATAAATGTTTTTTGAAGATGTTGAGCTACTAACTTGATACCCATTATTCAAAGAAA  
GTCCAATTTGAAAGGAATGGCAAATAAATGAGACATCTTAAGGCCGGTATGGCAAGGCCGTT  
TATTTATTGAAGGATTACGTCCGAAAAATAGATTACACGAAAGCCCCGGAACACATCATTTA  
ATAGTCACAAAGGCGAGCCCCAATTTGATGACCAGAACCTTATCGGTAAAAGAGTAGCAA  
TCCCAGTTTGTGGACCTATGTATTGGGAAGTTATGGAATAAGCGCAAAAAAACGGCAAAAA  
TAATGCCCTGCTTAGTGGTTTATTTCAAAGGTAATTGTGCTAAACCGTAAGACCCCCAAAAT  
TCACAATTGTAAAAAACACTGTCCTATCTGACTAAAAATATACTAAGGGAAAGGAAACGAG  
ATGAAAACCGTATTAATAAATCAAGGGCATCACCCATTATTAATGCACAGATTCCCGAT  
GGCGGGCGCAGACGATACATAAAACGACGTACTGGTGTACCGGATTGGAAGGCAGAGGCA  
GAACTAGCGTTATACAAAGATGATCATGGCCAAATCTATCAGCCAGCGAGCCATATTGAAG  
CTTCGCTTAAAGAGGCCAGTAAAACACTAAAAATACCAGGCAAACGAGGGGCGACCTATTC  
AAAATCATTGGTTCCGCTGTCTCTGTTTCCCCTGATGCTATCACTCATTTAATACAGAATTA  
CGAAACAGATAGCCGTCCTGTTGTGATACAGAAAGCACGGATAGTACGCTACAGGCCAATA  
TTTAAGGAGTGGGAATTGGAATTTGAAATCAATATTGGAGATGAACAAATCCCTATAGAGGT  
TATCAAACAGGCTCTCGATCATGCAGGGCTATATGTAGGTATAGGCGATTTTCGCCAGGAC  
GTGGAGGAAAATTCGGCAAATTCATGGTTGTCAGATTTGAAGAGAAAATAATATAGTCCGTA  
GCCCTGCGGGTTAGTCAGGTGAGGTATGGCTCGGCTTGGTTGGGCGTGGTATGGTCAGGTAC  
GGTTAGGCACGGTATGGCAGGGTAAGGTTTTAAAAAGTGAGGAGATAAAGGGCGTGGAAGA  
AGTAGATATTAGAGAAATTCTCGTTCCTCTTGCAATCGTGTGTATTTTTAAAATTACACGAGA  
GGAAATACTCAAATCTGATCTTGAATCGGGAGTTAAAAAGAGCTTCTAAATCTGTTGGGAA  
TAAACACAAACAAAGAGTAATCAAGAGAGGGCGAAATGGTTACTGAGACGAAAGGGATTCT  
GAACACGGATAATCTGTTCCAAATCTTATCTGCTTTGATGGATGAGTGTGTGATGAATTTGG  
GCCAGCAGGAGATGGCTGTTTCGCGGTGTTTATGCCGCAGATCATGCCAGAGATTAATAGACT  
CGATAAATCAGGACCGATTAATACTATGCAGAAATTTCATTTTTATAAACGTGAATTCGCAAA  
TTGAAATCCCGCCGGCAAATCATGATGGATGTGATTATCTCCTAAGCGAGGTATATAGACCC  
CACACAGTACCCGCAGAAACGGGATAGAAAAACAACCACTTAGCCAGACTGGCAGTCCCGG  
CGAGGAATGAATAATCCCAGAATAGCAATCGTGGTATAGCATAAGTCAACAATCCATAAAC  
CCCACCAACAATATTTACTACGGTCACAAATAGATTTCCGAGAACACTATCTGAGTACTGCA  
TAACAGAGAAACCCAGCAGGGCATTGAAAAATGATTGCTCCGGGTACCAAGCCAAGTGCC  
TTCCAGAATTAAGCACATGAACTGGCCTACAATATATGTAATGCCAGCCAACTAACCCT  
GCTGTCTCATCAGTAACTTGCCAGCTTTCTATTAACCATTTCGCCGATGATTATGATTCCCTC  
CGGCAGTAATACCCACCATGACGTGCCGATAATGGCACAGAAGAAAATCTGCCATATGAGC

CCGGCAGCGGCGCACGGCAATAACTCACTGGTCAGTCCCAAATAACCATAGTACTATGG  
CTGCCCCCAAATATACTAGCGAATACCAGAAAAAAGCAGGAGGGAAATCCATGTTTTCCAG  
GAAATCACTAATCGCTTGCCCGCCAGGTAGATTTTCAGGGTGCAAATCCCCATACCATCCGT  
CCGGCATTCTCCAATGTCATCATCTGTAACATTTCCACGGCTTCATCGTCTTCACCTGTGA  
TAAACGCAGACTGATTACAGGCTGTATAGCTGATAACTGATACGGATACATCCGCATCGGTG  
GTTGTAGTCCGGAAGGAAGGAGTAGCATCATTGCTGTTCCCGGACAGGTCCGTGAAAGTAG  
CGGCGTATTGCCATTCCCACGAGCCTTTTAATACCCCGCCACTGTTATTTTGGCATAAGTACA  
GGTAAGGCATCGAGCCGTTAGCCCCAATAACCAAGTTGTTAGCGTTATCAGTAATAGAGACT  
GCAAATGCGGCTGAGCCCTCTAAGAGACCATCTATATAGATATTCATCGTGCCTGCAGATAA  
AGATATCTTATATACATGTTCTGAACTGGATATATCCGCCGCCGTAACGATTGTATTATTTGC  
ATTTCTGTATTGATATATTTATGTCTGTTGTAGCAGTGCCACTCCAAGTACACCCTGAATT  
ATTTGTAGTGCAGTATCTGCCGTTAGCATAACGGATTAGTAGGGTTATACCAGTGAGTTAATTT  
ATTACTGGAGTCCCGTTTGGGAGTGACAAGACTATTGCATAACGTGTTCCGGCAGTTAGAT  
TAATTATATTGGAAAAATCAAATGTATGATTTACAGCAGAAGTTGAGATAGTTGAAGCTACC  
ACCGAACCGCTAACCAAGGCACTTCCTGTTGGCACATCGCCGCTAGTTGCATAGATGGCATA  
ATTAATAATTTCCAGTTGGATTGCCTACTCGTTGTGTTCTAAAGGTAAATTGGTTGACAGCCAC  
ATCATTAGAAAATTGAAAGGTCTGTGCTATCCAGTTAGCACCGTACATAGATGTAGCTGAAT  
ATGCAGTACCATTATATGGAGTTTCTGTATAACTTGATGAATTACCTGCCGATACATCTGTTT  
CAGACGTATAAATCCAGAATGCTCCAAATTTAGATAGGTTATAGCCATCATTAAATCTACCA  
CTTAGCTCAATCTCAAATCATTTCCTAGCTCCAAAGACGCAGAATCAACAACGCTCATACC  
GGCTGTGTCAGGGAAATAGGCCAGTTTACCGCCCATAGCAGTTTACCACCGGTATATAGGT  
TATAGTTAATAGCCGAATTTTGGCGCTATCTGGTCAATCCACATAATCCACGGATCAGATCCTT  
GCCCCGGCATAAAAAGGTATGTCATTACCGATGGAATCACGCATGGCGAGGTTATTAAGTCA  
GAATCTATATAATACCCATCCAGCAGACTATCCGTTGCCAGGTAAAGGGCGCGGCAACATG  
TGAGCTGTGTAACCTGGCATTGGTAGCCCGGATATTTCGCTGGTATATAGCATCTGTTATAGT  
TGAGGCTAAAATCGTGCCCGGCCAATAATGGTAGCCAGAATCAACATACCCACGGATATT  
ATTAATTTCTTCATGCGTGCCTACCCATCAAACATAACTGGCATAACGCTGCATATATGGTA  
ACTATCATTGCTAGCAGGACACCGTTAAACAATCCCATATCCGGTCCCACCGGCCAATATATA  
AGAAGTGGCAATCATTGCTCCGTGGTTATTCGCATATTTCACTCTGCCCCATATAAATAATCC  
TATTACCATCACGATACAAATTAGGCTGGTAATCATTGGCCAGCTGGTTACATTATTGAAAA  
TGGATGCCAAGCCTTCCAATATATCCCCGATTATTGTTCCATCCCATTTGATGAGCCCACTCAT  
CCAGCTTTGTCATCACCCACACTCTTCTGGTCATATCCAAACCCTGAGTTTGGAGTCGAAAAG  
ATCTTGGGGCACATGGTTTGGAGACCCGGAATTGTGCCCTTGCCATAAGCAGAACCGTATTC  
ATTAACACCGTGCCCTGGTCAGTCTCCGTCAACAGCTTTTGCACCCAGTTAATCTCCAACGC  
CCGGCAAACCTTCGATTATCCAACCTCCCATTAAGGTCTGATTTTCTTTTTTGGTTCCAGTTGG  
CTGTAGTCAGATGTGGTCAGAGTGTAATTGACCTCTGGCGGAATCTCCAATATTGGGGGTT  
ACCAACCATCTTGAGTATCAGAGCAGTTTCCCCTCCGGAGCATCATCAGCTGCAAAGTAAA  
AGGCGGAATACCCCATATCATAACCGGCGTTGTAGTAAGCGTATGGCTCAATTGCTCCAGC  
TGAATAATTCCATCTGTATCCATCAGTCTGAAATGAAAGAGTTTATTAGCCGGAGTGGTGGG  
CTGGCCGGATGAATAGGCGATGGTGTATTTAAAGGAGACCAAGCTATCCCCTGTCTCTACAA  
TATTGTGCGCAACCTGCACATCATCAATAGTAAACGTGGTGGGCGCAGCCGGTCAACAGCC  
AGTACCGCTGCCGGCGGTAAGGATGCCAGACATAAGCAGGCAACTATGACGCCTTTATAGA  
TTTTCGTAAATAATCTGCCATTCAATCACACTCATATATATTGCCGGTTCTCTGGGGAGGTC  
TTCTCCCTTCAGATAGCGATAGACCTGCATCCTGCTGATGCCGTATATTCGTGAGATAGCCGT  
AGCTCCAATACCATGCGTCTGCATGATATATCGCAGGTTATCAGGGAAGGCATCCTCATTCT  
TAAGGGCCTCAAGCAGCCCGGGTATCTTGGCCGGAATATTATCTTCTGTTCTTCCATACTTT  
TAGTCTACCTGACTGCCTGTTAATAACAAGGTCCTTAAATCTCCCTAATTATTTATTAAGAT

ATACCTCAACTGTCACTTAAAGGTGACAGTTCAAGGAAAAATCTTGTCTATCATCATAGAAA  
ACGAGAGGAGGTGATAAAAAATTGGGCAAGGCAATGTCAACCGTCATGTTAATTGTAGGTA  
TCGCAGTTTTCGGTTTTATTTTTCCCGATGGTTCTCTCCTCAATGGATAGTATTCAATTCGCATC  
CAATACCGGTACCTATGCCGCCGTAACGACCGGTGTGCGCGAACTACCGCGGACGTTGTTC  
TTCCACCGCCTTATAACAACGATGATAACGGTCATGTTACCAGCATCACGTCTACGGTTGGG  
ACAGACGTTCCCTGTGGCCGGCACGTATGTTGCTGCTACTAAAACCCTGACTGTAACCGGTTT  
AACGGCTTCCGAATCACGGACACTGACCGTCATCTATGACTCCGACAATCTGTGCGACTACA  
CCGGTCTGGGCACTATTGTCAGCCTAAGCCCGCTCATTATCTGGCTGGTAATTCTGGGTGCCT  
TGGGTATCGGACTTTATTCCAACGTAAAGAGCTAATCCGCAAATTCATTCATAGAAAGGAGG  
TGACAAAAGAAAATGTTAACTCAAACACGATGAAGGTCGTAGGAGGCATTCTCGGTATAG  
CTATTTCTCTGCTGTTCTTCCCCATCGCCCTGAGCGGTATTGATGCCGTAAGCAACGCCA  
ATTTGGCCGACTATACCGGGTTGGAACCATCGTAAAGATAACCCCATGATCGTGTGGGTG  
GGTATCTTCCCTCGGTTCCGGCTTAACCCTGTTTTTTGGGGTCAAAGGAAGCCGCGGGGGCAA  
AAAATCTAGGTCACGGATGGCCTAAAGGAGATCGTAGCCATGAAGATACTCTGGATGCAAT  
TTGGAAGAGACAAAACCCGGACACAGGACGTACACGTCCTGACCGAGGATGGTCGTATTGT  
CGAAGTTTCTCCGGATGTGCTTTATGGCTGCGTATCTGTGACGAATGGGGTCAAGCATGGG  
TGCTAAGGGGTGCAGACCTGTGTCCCTCCCGTGATGGCAAGGGAGACATACTGCTTGTTAAT  
GAGCGGAGCTTAGCACCCATTGCGTTTGACGGACGCCCTGCACGCACGCACGAAGAGGCGC  
TGAAACTCAAGGATGATATCGGAGCAGAAGCCTGTGAAAGTGTGCATTTTAATCGTGACCGC  
GAAATAAGAAAGAAACCATGGCCAATGTACTCCAGGTACTTATTATCGGTCTGTTCCGGCAC  
GGTCTGTGTAATTGCTCTCATAGGGGTATATGCCTCAGGGAATGCAAATGCCATGGGTGG  
GTTAGAAGAAATGACAAAAGCATCAACAATTGAAAAGAACCAGGAGTTAATTGCCGGATTC  
AAAATCCTGAAGAAATAATTTTCGTGCGTATGCAATCAGACCAAAGGCTAAAAGGGAAC  
CCAATGCCCTGGTTTATGATATGCGCCTAGGTTGGGCTCCGGAATATATAGATAATCCTATC  
GGCCATCGTAAATCATTCCGAAACAAGCGATTATGCCCGATTATCAGGCGCTGGAAACAGTT  
ACCTACTGGCGAATGGGAAAGCAAATTAACCGGTCCCTGAACCTGAAGATATGGAAGCA  
TCCCCTCAAAGTCTTTACAGAATGCTGCATTGGGAACCTTTAGTTAAGTCTGCATTTGGAGG  
GTTGGGAGATATCTGGCAGAAGCTTAAGGTCGGACTGCTGGTTGTATTGGTAGGTATAGGGA  
TTTTTGCCCTGTACCTGTTACCCAATCATAAGGAGTAGCTATCATGGCGGGATTTAAACGTA  
AAAATGGCGGGCCTGCAACCGGAGGCACTACGGATACTTTAGGTATCCAAGATACAATCGG  
TGCGGCCGGTGGCAACGGGTTTAAGTCAGGATTACTTGATTTTGATGCCCTGGAAAACTAC  
TGGGAAATCCTCAGACCGTAAGTCTGGCAAAGAATTTACTTCACCCGGTGACAATGTCCGC  
GGTCTGCTGATGAGGGCCGACTTCAAGGATGCCAACAGGTAAGTCTCGCGATGATTGAGTACCT  
CCATCGCTGTAAAGAAATTCATTACAAGCGCGGTGAAGACAGATTACTGGATTTTATTGCCG  
CTCTGCCAGCAATTCAGGCCCGCCGGATAAACCTCTTGGCCAAAGTTCTTACCCATGGCGTA  
ATGGAAGCTTCCAGCAGGCAGCAGAAAGAACGGAGACCCGAATGATCTGGGGATATATAGG  
TCATGAAGGTGCCGGCAAATCAGCTGCCATGTGCTATTTTGATCTGCTGCATATTGCCAAG  
GGGGCGGGCTGTTACCTTCCCGGGCTTCGAAGTGTTTAACCCCAATATCACTCTCGATGAT  
GGTAATCATCCCCGTCTGGGCAAATCTATAGATATGAAGGAATTTATTTTCTCCTCAGTGAT  
GAGCAAAGCTTCGCAACGTGTTTGTCTCTATGGATGAGATCCAGAACTTTTTCGGGTCTGA  
TAAATACATGACTATGTATAATAGTCTCATTACCAAATACAGCATGCAGCGCAGAAAGCTTA  
ACTTCGGCATCAATTACACCGTCCAGAGTTGGAACCTGGATTGATCCACGATTACGTCAATTA  
ACCCACTTCTGACTGTCTGTAAGGATTTGTACGAACACCTTGGGGCAAAGAAGCCGGTTT  
GAAGCGCGGCAACTGATAGACCTGGTGACCTATGATTGCAAAGGGTTTATTACCGGCGAG  
GAATGGACTCCTTTGAAACACTTTAACTTAAATATTTTGCCGGTTCGCGATTGGTATGACAGT  
TATTCGACAGTGGATCCGCTGGAAAGTTTTAGAAAAGCTGGTTATTA AAAAGCCTGAAGATAT  
TTTGATATGAGAGAGGGAATGCCACGATTTAATCCGCTGGATGATTCCCCTCTTGAGAATG

TACCGGATGACGTCCGTGAAATAAGCCAGGAAAACAATGCCCGGATATTATCCAAACTTGA  
AGAGCAGGTCGACCCGGCTACTCTTATTTCAGGTGAGCAAAGCGCTTAGAAAGGTTAATGCA  
AAATGACAACGGACGAAGGGTTATTAGCGGCTGCTCAAGCGATTGCAAACGCGTTAGAATC  
TCTGGGCAATACCCTATCAGCTGCCCTTGACACATCAGTTACCACGCTGATGAGTACGGCTT  
TATCAACCGGATTGGAATTATTCTTACTCTCGATGATTACTGTATTGGCGCTATGGAAACGCC  
ATATTGTAAGTGGATATTCTGGCAGGGCTCGGGTGGTTTGGTATCAGTTTTACCCTCTTCAGCA  
GCGCTTCACTAATAGCGGTAATGCCATTTCGCAACCTGTTTGGCTCTTGGGATATTTATGTTTT  
ATCGGATTATTGAAGACACCGGCCGGATAGGCCGATAACGAAGGAGGATGACATGCGTACA  
AGTAAAAATATGCATCAAAGAAGCCGATAGTATCCCGGCAGTTAAGGTAAGCTGGCACGA  
AGAATGCCTAAATTTAAAGAGTTTATTCCGAAAGACATCCGAAGGCGTATCGGGATGCGA  
TAGGAGGCCGAATTATGGGTATATTAGGATTTCTTCTCAGGGTAGCTCCGGTAAAATCCTC  
TCGTATGGGCCACCTAGACAACCAAATAACCAGGTGGCCATTAATGCTGCCCTGCAATCCGT  
TGATAGCTCAGATTCCAAGAAAATTACCACAGTTGAGATGAAGGATGGCAAATGGACGATT  
ACCACTGACGGTGGCTGTTTATAACATCGATACAAACGGCCAAACAGCAGATACCGTGCAGT  
ATATAACCAATTATCTGACTAGCCGCGGGGCATCTGCGGATATTATCAAATCAGTTACAGAG  
CAGATTTCCATTATCACGACACGGGAATCTGGAAACGTCGTTAAGAAAAAACAGTGCAA  
CTATCACAGATCCTAATGATACCACCAAGAAATACACTGCTGAACCTGTAAATGAACCAGCA  
AATGATTCTACCGGTGAAGGTGATACTCAAATAACACCGATGTTTCGGTCACAGTGGATAA  
TTCTACGGCATGGACGTTTACTACCCCTAACGGCACAGTCTACACCGTGCCCATGGCGGGCT  
TAGCCTGGTCTGACCCTGCCAAAATGCATGAACATATAACAACTACCTGAACAGTATCGGC  
GCGCCCGCAAATGTCATCATGGAAGCTGTTAGCCGTATGCCCGATGTAATGGGCGATACAGG  
CTTGTGACGCGCCAAAACCTGACGAATTTGGTAATGAGATAGACAATACTGAAGAGATTA  
AACATGATCGCAGGGAGTGACCAATCTTTAGCTGCAACAAACGCTTTAAAGGCATTCTTAGA  
TGCCAAAGGCTTTTCAACTTTGTCTCTGAAGATCAGTTTAAAAAGGCTCTTGAATACGGGA  
TAATACCGGCTGATTGAGTGTATGTGCCTCCTGATGCAGGGTACAACGTAGGCCAAAACGCA  
CCGCCCAGGAATGCCTGATGATGTGGCCGTCAGCTTGGGGCTACTCCCCAAATCCGAGCAGAT  
TGAATTCAATCTGCCCAACTTTAACTGGGCGTATCTGCCAAAAGCCGATGCAGATAAGTATT  
TCGCTGAGTTACAGGCTATTGTTGGCTATGAAGTAACCAATAAAAATCTTAAACAGGCTATG  
CGCGAGGCACAGGAGATAACCACTAAACAAAACCTACAGGCCAGTTCAAAAAGCTATCTCAG  
ATGCAGTACTGGAAAACATTGCGCAACAAAGGCTATCTGGGCAATTCAGATTAGCGGATGT  
CATAGGACTAAAGCCATCTGATATATAACAATAGAGATGGTAGCCTGAATTCTGCCAGAATAG  
CTACTCTTCTCGGTGGTAAACCGAGTGATTACAAAACGATTGATGATGTTCTCAGAAAATCA  
GCTGATCAGGATTCTGGTTTAGCCCGCGATGTTGTCAAAGAGATATTCTCCTTTGGGCAAGC  
TCAAACGAAAACCTTTCAATAGAGACGATCTCTCCAATGAATATGATAAGGCTGCCTTTCAAG  
CTTCGGTTAAAGGGCTGGAAATGGCCGAGGGCAAAGAGGAATTCATTACCCGAATAATCAA  
GCAGCAAATAACCGGAGAAATTGTCTCAGAATTTGCTATTTACATGATTCCTATAGTCGGTA  
CACTATATTCAATCGGTAAGGGGGATTTCAGGCGGTCAAATAGCCTTGTGAGCTGCTATTGAT  
GTCGCTACCTTTATTCCGTTTCTCGGTCAAGCCGCTGCAATAGCACGGGCGGGGCTAGACC  
CGCTGCAGCATTAGGTAAAGCGATATTGGCAGAGGTAAAAGCGCCTCTAACCAGTATTCTAC  
ACCCATTAGCAACTACGAAAGTGGCTTTAAGTCCATTTGAAACCCTGATTGTGCCGCACAAA  
ATACCTCTTAGCTCAGCTGAATTAAGCTTCCATACAGTCCGCCTGCCTGTTGTGGATGTTGGA  
GGCAAAAAGCGCTTGCTATGGCTCTCCGGGATGAAATAACTAAAAAGGCAATTGCCGGTA  
AAACCGCTAAATTTACTAAAGACGGGGTAACAGCGGAAATCCAAACAACCGCCTTGAATAA  
AACCATAGCCCCAGCTGTAATTAAGTGCTACACCAGATGTACGCCATTCTTAGACGGCCTCA  
CTGTAGGTGTAGTTAAAGATGAGGTAAACAGGCGCTGCCTCTGTAGGTAAAGGCCGGGATTTA  
TTTGTATCCCCCTCACTGCACACCAAGTTTTCCATGTCTACAGCCGCAGGTATTGCCGGCTCA  
AAAGGCGCTCTGAAGGGCGCAATTATTATAAGAGACCCGGAATTACTATCGAAACTTAAGG

TCTCCGGGAAACTCTGGGCTAGTGCAGCGGAAATAGAGATGCGGCTGCCGGCTGGTACCAG  
ATTGCCAAAGCCGGATCAGTTTTTGTATTCTCGTGATGCTTATGGGGATCTCTTACATATATT  
AGTCATCAACGGCAAAGCCTCTCCACTTACACAAGCAGAAATAAACCAGATGAAGATTATT  
GGCTCAGCTGACACTCTTAAAAACATTTTCAACCCTGGCACAAAAGCTAAAGTGACCAAAA  
AGGCAGGTAAACTACCCCATATGATGAATTGATTGAAGCTAATAAAAAATGTAACCTCAGATT  
AAAAACAACCTGGAGCAATTTAAAAAGACTGGCAGAATCAGCCCTATGCCGGACGGCGTGT  
ACGCTCTCGGTGATCTACACGGCAAATACAACCAAGTTATGAGCACTCTGACCAGAGAAGG  
TTTTGTAGATGAAGCGGGTAATTGGATAGCCAAAATAACAACCCTGGTACAGGCCGGTGTAT  
ATTGTGGATCGTGGTTATGGCGGTACTAAACTGATTAATAAACTGCAAGCCCTTGATAAACA  
GGCTAGTAAGATGGGCAGCCATATACTACTCTTATGGGCAACCACGATATAGTATTTGGAG  
CAGTAGCCAGAGAGCTAAAAACCCTTCTGCGGAGCTTCTTAGCCAGGCTGGTAAAGTACGT  
TCGCAAGAGCTGCTTAGTAAATGTGCCGAGTATTTTCAGGAGTATAGGTAATGAATCCTCAGC  
CAAGTTAATGGAGACGTTCTCTAATGGACGCGGGCACGTTGCCGAAGCCTTGTCAGCTGATA  
GCAAAACACTGGAATGGCTTAAAGACCGCCCGGCCATGTACATTAAGATGGAGTCTTATAT  
GTTTCATGCAGACAGCCCAATGTCTATATGCAGATCCTGAAAGAAGCCAAAGCCAAAGGTTT  
TACAGGGAGCAATCTTGAAATCGTCAATAAGTACACTAAAGAGCTTGCTAAAACCACCGAA  
GGATCCCAGCATCTATATGATTTGATGGTCAAAAATCGCTATCAGATGACCAGAGAATCAGC  
AATGGAGATGCTAAAAACATTTGATGCTGACAGACTTGTTACGGACATACGCCCCAGGGC  
GGTAAAATAACCAGTAAATATGAAGGTTTGGTAACTAACATAGATTCCGAGTCAGGTAATA  
ATGGTGTATCCCGCATAACATCACATAGGCGGACAGGATATCAAGTTACTGCGTAATAATTCA  
CGGGTGATAACACGAACTGAATTGGAAGCCGAATATGCCCGTGCTCTGGAAGAATTCAGAC  
TGCGTGACATGGCGGTTAGGCGTGGCTATACCGTACCATATAGCGTTATAGGGTTAGCAAAT  
AGGCAGACTCGGGTATTTAGACGCGCAGAACAACCGGCCGCAGGATAGCCACCTCGAAGG  
AAGCACGGGTAGCTCCAGAAACAAGACGTCCTGTATCAAATAATCGTAGAACTGCTGCTCTT  
CCCCGTCACGGCAGGAGCGGTATAAGAGTTACTGGTAATCTCCCTCGCTATACAAATACCGA  
GCAGAGAACGGCTGTATCTACAACCTCGAGTACCCAATGAAGGGCGTGTTAACCCCTCCCGAA  
ACCAGAGTTAATACTCCTGTAGTAACGTGCCACCCCGCCCGGATAGGTAATACATCCC  
CAAATCACCTGATAAAAAATAGACAGGTAACCACAGAGACAACCCGTCCGAAACTCAAACC  
GGAGATGTGGCATGGAAACAAGGCGCTTTAGGCAGTGGTGATGATCAGCGTCCGGTATGGT  
ATATAAAGCGTGCTAACGGCAAGGTTGAAATAGTTTTTCCAACCGCCTGAAGATGCTCCGAGG  
CTTGAAGGCACTCCTAAAGAAACGTTTTTTACTCGTGGTAAAAAACCTCCAACAAATCTCAC  
TCAGGAAATGGGTGTCACTACTGCCAGATTAACCTTGAGCGCAACCCGAGGATTGATTTCCG  
TACCCACTAAGGCGCCCAAGTTTAAACCCTATATTCCTAAAAATGTTAGGCGCTCAATTGGT  
ATGTGAAATATCTTGACTTTTTGCCATTGTAATAATTAATATTGGGTATGGATGAAATTGATA  
TTGTAACAATATGTTTGACCATTATAGTTGCTCTATTAATACTACCTCAGCTTTTGGCCATCA  
TAGTTCGCTTCTTTAAAAACCATAATCAAAGTATTATTACGTTCGCATATTATAATATAGCTG  
ACTCCACGAAAATGATCTTATCCGGTCCTTACGAGAATGTAGTGGAGTCCATTAACCATGTA  
ACTAATAAGCCTTATATTTTCAGAATGTATTTCAGTACGAATTGAAAACCTACAGACTTGTGTAA  
GGCCATAGATCAGATTGAGGCTGGAGCTAAATACGCGCGTATTTTGCAGATAAACCGCCCTC  
CCAATATCAAGAATTAGACCAGTGACAAAGTGTCACAGATATTCGGAAGATATGCGAAAGG  
CCGGGATGAACCCGGCCTCTTTGTTCTTGGAGGTTAAAGATAATGAGGAATTATACTAGTAG  
TACCTAAGCCTGTTTTCGTCTATTATAAGGTGATTGATTGTTAGGCTTTAAAGATATATCCTC  
CTTACCAGCTTTGTTCATATACTGCATTGAGAGTTCTCCCCAGCTTCACAGCTATTAATCTTGT  
TGGTGTATTTCTCCGACCAATACATTTAATTTACTAACATCTTCTTCAGTCCATCGTTTCCCA  
CTATTCTTTTTCGAATCTTCCACTGCAAGCTCCTATTTTTATTACAAATGGTCCGCCCCCAAT  
ATCTTTACCCCTCAATTTAATTATACTCAGTCATGCAAACGTTTTTTTAAAGCTTCAAATTAT  
CTACTGGGCTTGCTTGCCGGTGGACTCTCATCATATCTTCTGTACCCAAAGTAGAAGTATAAC

GCCTGGTCATAGCAAGAGTAGTATGCCCAACATGATTTGCAGGGTAAACTCATCCCCACCA  
TTACGTAGATAGTTTATAGCTGCCGTATGCCTGAAAGTATGAGGTCCTGGCTTAGCATCAGT  
GATATTAGCCCTCTTACAAAGCTTTTTTATGGCTTCCTGAACACCACGACAAGTAAGTGGTC  
GACGTTCTTCTGTAAACCATAAACATTGATAATCATCATCCCTATTAAGCATATACTTTAACA  
AGGCTTTTTGGGTCTGTTTGCCTATTCGAACAATCCGTTCTTTTGACCCTTTCCCAAATACAC  
GAACAGTTTCTTGATTAATAATCGATGTCATTAATATTAATGCCGGAATTTCTGCTAATCGTA  
ACCCTGTATCCATAAACAAAAATATTAAGCAGCATTGCGTAATCCTAAAAAACTTGTTTTA  
GCATTAACACCCAATAATTTTTTATGTCCCAATTGAGAAGGGCTGGATTACTTTCTTATCT  
AGCCTCGGAGGTTTTAATGTGCGCATTGGATCGTTTGCAATATAAGCCTCTCTCATTAAACCA  
TGTATAAAGGCTTGAGGTGCACGATAATATGCATTCACAGTGTTATTCCCGCACCCCTTTTTCT  
TGCAAGGATAACAGGAATGCCCGTATTAATTGAGGAGATATTCAGAGGCTAACTGGAGAC  
TGAAGCGATGACAAAACGACACAAAACAGTTAACACGCCGACGGTAAGTATCAACTGTTTT  
TGGAGATTTACTCTACTTTACATGAAATTAAGTAAAACCTCGAGGAGCCTTTTTAATTCATT  
TGATGCAGGACTGTGCTCTATGGCACGAATGAGCTCATCGTAATTAATGTTGTCAGGACTGT  
GCTCTTTCAATTCATTTTCGGCACGGGGAAGGCTGTTTTGACTGTTTTAGCTTTATGGTGG  
GCCATCTGGTCTCGAACCAAGGACCTCAGTCTTATCAGTTCAGCCTTTAAAACAGTAAA  
TCCTCTTTAGCCGCCTCCTTAGTG

>Dmc\_IME1-2

TTTCAATCTTTTGGTTACTTCAATTATGACAGCAATAGCCTGGCATTCTTTAACAGAGTGAGT  
GCCTTGCCATTTTTCAGGATACATTCGCCGTTTTGCTCTATAATTTTTGCCACTCGGAGTTCC  
TCGTCGATAAGACACAGTACAATGTCCCCACCTCAGGAACCATATCCCTGTCTACAACAAC  
AATATCACCATTCTCAATCTGGGCTCCATACACTTACCCTAACGATATATGATTCTATATT  
ATGCCGTGGTGCCTCACGTACACGTGTCCGGTAAATGTATTCAACTGGAGCAAACCCACTAT  
CCCCTGCGTGCGCCCTAAATTCAGTATAAACAGGTATGCTCATGGGAGTAGCCAGCCGTAAC  
CGTTCTAGTATCTTTCAGGACTCTCTGGGCGTGATAATGGTATTGTGGAAGTTGGATTGTGA  
ATACCCATAGATCTATATAAGTCATCCACATTTATGTTAAATGCCGACGCAAGTTTTACTAAC  
TTATCCACCCTGGAGTAATTCTCCTACTAGATTCTAAGGCTTGATAAGTGACCTTGAAAGA  
CCTGCTTTATTTGCAAGCTGCTGTTGAGACCAATTCTTCGCATCTCTTAGACTACGTATTTTAT  
CCGATAGTTGATTGATTTCAATTCATGTTCAATTTGCCACTATTTAGCAGGATTTAAGCAAAA  
TAAGAGCCTCAGCGAGATATTTATAATAAAGTGGCTCTCTTTATTATCCATTGGCTACTATA  
TTATCTATTTGCAGTTGTGTTTTTGTAGCCCTCGGCTACTATTTTATCCATGAACACATTACT  
CGAGCAATTGATTACTGAACAACTACTCGTCAAATGAGCGATTATCAATTTGTTAAATTTTT  
AAATTTCCATAGCAACGCTCATGTATCTCGACAACCTTTGGCATCAAACGCGGAATAAGCACA  
TACCTTTAGGTTTTAAAATCCTAAAAGCGACAGTGCAAACATTTCCGGAGCTTGAGACTGCC  
GCCATCGATTATCTCAAGAAAAATACTAATCATGAGTAAATCTGATTGTGGTAACGCTACCT  
TGTTGAAATACGGTCTTGAGTATTATCAAGCAATTGGCCGATTGGGCGGCAGACCAAAAATT  
AAGCTATCCGATGAAATACAAACGCGTACAGCCTCCTTATCTGTATTGGTGAAGGAGAACG  
GCACGGGGAAGGCCAATCTCTTATGGCACTTAAGAGGCTGTACGCAGAAAGGGGAATGAGG  
CAATGCCTCAACAACAAGTGACTIONTCATCAAGAATGAACGCACCGGTCAATGGTGGGA  
GGGAAAAGCTGATAGCCCGATAGATGCCATGCCGAAAGCCTCCCTCGAATACCCGGTAAAA  
AGCCCTAGTACCGGCTGGACAGCTGAAAACCTGCTGGGTACGTCAATGGTGTCTGCTGGTTA  
TGGCTCATGGGTAACCCAGACTATGTCCGCAAAAACAACAGAGATGGTGAAGCATGAAAT  
TCTTTCCACGTGCTTACCGCGTAGCTAAAAAAGAACAGGAGAAATAATATGCCTTATAAAAG  
ATATTTCCCGGCCAAGATAGTAAGTTTTGACCCTTATTTTGAATGGAACGTGATGGTCTTAA  
GTCATTTATTATCGTCACAGCATTTTCTATGGATGCACCGGGCAATCTATTGTTGGATGAATT  
TCAGAAGTCAGAAGTCCCTATACTGATAACAATCCATAATCCCCAAACCTGTCAATCATTTA



ATGCCTACGCAACCAAAGTTGTGCAAAATTCTCCCGCCCGTTACTGGAATACCATCCATATC  
GACACAGACCGCATAACGAAGAGCAGAAGAAGCGCAAACAGCTATGGCAGGCTACCCCAA  
AAGGATGACCTTAATGACTAGTGAATGGTTATCTTGGCTGAAATACGTACCGAAACCCAGC  
AAGGCCGTCCCGCCCCTACCACGGGCTGGGAATGGACTGCCGGTGATACTCCAAAAACAGA  
CCCTAGCCCAGGTACCTGGTTTGTGCGGGCGCATGGAAGACCGTTTCGTTGTGTTTTCCGCTC  
TAAACTGACACCTGAACTAAAGGGCAAAGGACCTGAATTCCTCAATCCTGACTTTTCCGCCTA  
CTGAGGCAGGGGAATATGTAGCCCGTGAAATGGCAATCAAACACTACGTAATGAATCATAACCG  
ACAGGAGGCTGAACGCAATGGTCGTAGCTACTTCGTCTAAACCGATTGAATTGTCACCCCGC  
CGCTACCGCAAAGGGAATTATATGTTTTGCCAGTAAAAGCCGACCGCAATTACAAATGCC  
GGAGTGTGGTTGTCTGGTACAGCCAGGGGAAGTTGGATTTACCCGCTTTAAGATTATTCATG  
ATCTGGTAACTGAGCCTGTCTGGGATGTACTGCATGCGTGCTGCGTGGAGGCAAGGGAATGA  
TAAGAATTAATAATTGGTCATCTAACGCTCTCTGCGGACCTATCTCAATCCGGAGATGTAATT  
ATTACCTTGAGGACTGAAGATGGCACACCTGTTGCTGCCGCCAACTCAAAGACACTTATTGC  
CGCTATTGAGGCACTGGAGAAGACAGCGGAATAACATCCAGGACGGACAGGGGAGTGTGAT  
CTCCCTCCCCTTCCCTGTCCGTCTTAAAAAACACAAAGGAGTGACATATGGTCGTATCAA  
CACTGAGTAAGAGACCAATTCTGCAAACCTACCTTGTACCCACTGCGGCCGGGAGACCGA  
ATGGGATTTTGACCTGGGCTCCAATCCACTATGCGCATACTGTTGGGACAACAGTATAGAAA  
TAACCGTCAAGGTTGAGCTGGCTGATAAGATGCGTGCCTACCGCCAGGAGCATAAAGGTTGA  
GCTGGCTGATAAGATGCGTGCCTACTACCAGGAGCATAAAGGTTGAGCTGGCTGATAAGATG  
CGTGCCTACTACCAGGAGCATAAAGGTTGAGCTGGCTGATAAGAAGCGTGCCCGTTCCGGCTAT  
TTCCAATTAAGTCTGAAATGAGGTCCAATATGGTAATAGCAATACGAAAATATACGATA  
GACGATATCCTTGCCCGACTTCAGGGCGTCAAAAAGAATGGATCCGGCTACATGGCCTGCTG  
TCCTGCCCATGAGGATAAAAACCCGAGCTTGTCCATCAGTGAAAAGGACGACAAGGTGTTA  
CTAAAGTGCTTCGCTGGTTGCACCTATGAGCAGATCATGACCGCGTTGGATATGCCCGCACA  
CGCCGCAGCACAGGATACTACAACCACTCCAAGCAGCAGAAATTAACAATCCAAGCCT  
CTCGGTAAAATAGTACAAACATACGATTATACCGATATGAATGGGGCTTTACTGTTCCAAGT  
CGTCAGATACGAGCCAAAGGCTTTTAAGCAACGCCGTCCAGATGGGAAAGGTGGCTGGAAC  
TATAAAGTATGAGTGGCGTAAATACAGTTCATACCATCTTTACGAACTGTGGACAGGCATCAA  
AATGGGCCAAACCATCTATATTGCAGAAGGCGAAAAGGATGTTGATAATCTGCGCGGGCTT  
GGTTTGGTAGCTACCTGCAACCCACGCGGAGCTGGGCAATGGAAAGAGGAATATACCCAAT  
ACCTAGAAGGCGCTCACCAAGTTATCATCATTACTGATAAAGATCTGCCCGGACGAAAACAT  
TCGTCAGAAGTCGCTCTCTTAGTTCATAATGCCGGCATACTGTCAAATAAATTGAAATGCC  
CGGCGAATTTAGAAAGACAGAAGACGGATACACTGGAATAAAGGACTTTTCCGATTGGCTG  
TACTCTGGGGGAAAGGTCACAGAAGTACTAGAGACATTAGTAAACTAGCAGCTCCTTATGTCC  
CCCTCTGGCCAGGACTCACTACGGCAGATATCTGACAAAACATACTGTATCGAATCAGGAA  
AAATCTGCTGGATTAACAGGAACGTGACGGCAGTATAACTGTACCGTTGTGTAATTTTACG  
GCCCCGTGTTACTGAAGAGATAACCAGGGATGATGGAGTTGAATCGAATAGGTACTTCCGCTG  
TCTTGAAATGATTGCCACGGACAGGATCTACCAGGCATTGAAGTACCGGCTGCAAATTTTT  
CATCACTGAGTTGGGTGGTTAATGATTGGGGTATGAGGGCAATTATCGGCGCCGGAATGAAT  
GCCAAGGATCGGCTCCGTGAGGCCATACAGTTACTCAGCCAGCAAGCCTTATCAAGACGCAT  
TTATACGCACTGGTTGGCGCCATTTAGATGGCACTGATGTATACCTGTCACAAGGTGGGG  
CCATAGGTTGTGACGATGTAGATGTAGAGCTAGAGCCACAGTTGCAGCGGTATTGCCTGTCA  
AAACCAGATGATTCAAACACTTCGAGAATCAATCAGGGCATCAATTAATTTTCTCTATACCGC  
AGATATGCATATTACCCTGCCTCTTTGGGCAGCCATGTATATGGCTCCATTAGCAGAGGCAC  
TTGATCCAGCTTTTACTCTCTGGATGGTAGGACCGTCAGGTAGTTTTAAAGCACCTTGACCG  
CCTTGGTATTAAATCATTTTGGAGATTTTGACCAGAACCATCTGCCAGCATCATGGAGAGAT  
ACCGCAAATCAGCTTGAAAACTACTGTTTCTCTGTAAGACATGCCATTGGTAATTGATGA

CTGGGCGCCTGGACAGGATAGTGGGAAGGCCCGCGAACTCGAAGTAAAAGCAGAACATATA  
GTACGGGCTCAGGGCAACCGACAAGGACGGGGACGGATGAGATCTGATACGTCAAGCAGGC  
CTAGCTATTTCCCGCGCGGTATGCTGCTGACCTCAGGCGAAATGTTACCCAGTGGGCATTCA  
CATAACAGCCCGTATCTTCACAGTGCAACTTGAAAAAGACATGGTTGACCAGAAATTATTAAC  
TACTGCCCAGCATGAGCGCTACCTATATCGTCAAGCTATGGCTCAATACATCAAGTGGTTGC  
AACCGGGCTGGATGGACAAAAGGACAGCCCTCAAGCGTGAGGCCGAAGAGCTACGGAATA  
GTATATTGGCAGACGTTGAAACCGGATCTATACATGCCCGTTTACCGGATGTTATTGCCATG  
CTCTGTATAGCTTTAAATAAAGGCCTGGATTTTGCCAAGTATTGCGGTGAACTGACTGCCAA  
TGAATACGATTTATTCAAACCGAGGGGGCGGCGTATCTTTATCGAAATGGCCTGTGAACAAG  
GCAACCGTGTGGAAGAACAGCGCCAGGACAGCGAGCAATTGAAGCTATTCAAGCGTCTAT  
CCGCATGGGTACCGCAGTATTGCGTAATAAGGCCGATGCATCTCTTACAGATCTGAGTATGG  
GTAAAATTGCTATCGGTTGGAGAGATTTCCAAAATGGACATGTTCTACTGGATCCAGAGGCG  
ACCTATCAGGCTATTGTCCAACATAGCGAAAAGTCTAAACGCCCATATACCATCACTCCCGC  
AGAAACATGGAAAGATTTGCTTCGTTTGGGATATTCAGAAGAAGGCAGTGACGGGGCGCCCA  
ACAATAATGGCGCGTATAACGGCTCTCCCAAAATCTGTACGAGTAATCAAGCTGAAAAACG  
ATGCCATAGGATTAGCAGAAGCGACTCCATTAGAGGAATCATTACTATGAATTATTTTTGCT  
GGCAGGGAGGATACCAAAAACTGGAAACATTGGAACATGGCATTCTCAATCGTGGCT  
TACGTTGTATCCAGTTACTGGAACAAGCCCCAAAAATTGGAACATTGGAACATACATA  
ATATTAACCTGGAAACATTTTGGATACACGATTAATCACGAATAAATAAATACTTAACAAT  
AATAATAATGGAAACATTTTGGATACAACGTAAGTTAGCTTTGCTTAAAACACTTTGTTTCC  
ATGTTTCCAATAAATAAGGGAGAGTCTTAAATGAAAGTCGCTTTATATGCCAGGGTAAGCAC  
CCGAGATAAAAATCAGGATCCGGAAGTCCAGCTCATGGAACCTCCGGAATATTGCCAGGAT  
AATTGCATGGAAATTACCAAGGAATATATAGACCAGGCGTCAGCAAATGACTTTATCCATCG  
CACCGCATGGAAGCAGTTACTGGCAGATGCAGCTGGCAGAAAAGTTCAAAGGGTTATTGGTTT  
GGAACTTGACCGGGCTTTTCGCGATATTACGGTGGCAACCTCATCCGTTAAAATGCTGCGC  
AATGCCGGCATAGATTTTATTGTTACCACTGTCCCAGTTCTTTTCAGTCCAAGGTCCAGCTGGA  
GACCTGATGTTTAAACATCTATGCCGCTTTTGCCAGTTTGAAAAAGACACCATTATTGAAAG  
AGTTAATGCTGGACTTTCAAGGGCAAAGGCTAAGGGTAAGACATTCGGTCGCCCAAGAAAG  
GCAATAGACTTCAATAAGGTTTGGAAAGCCACGAGATAGCCTGCTCACGGGTAAACCGGAT  
TACTAAAGAAAATCAGGGTTATTCCGAGACGGCGAGGATATTGAGCGAGCAGACCGGGCTA  
AGAATTACAGCCGGTTGGGTCTATAACCGGCTTAAAGGCCGGAATTAATAATGCTTCAAAAA  
ACCCACCCCATTTTTGCATAAATTTTAAAGCCAAAAATCTTATCGGATGGGAGGCTTCAAA  
AAATAAATGTTTTTTGAAGATGTTGAGCTACTAACTTGATACCCATTATTCAAAGAAAGTCC  
AATTTGAAAGGAATGGCAAATAAATGAGACATCTTAAAGGCGGTATGGCAAGGCGGTTTATT  
TATTGAAGGATTACGTCCGAAAATAGATTACACGAAAGCCCCGGAACACATCATTTAATA  
GTCACAAAGGCGAGCCCCAATTTGATGACCAGAACCTTATCGGTAAAAGAGTAGCAATCC  
CAGTTTGTGGACCTATGTATTGGGAAGTTATGGAATAAGCGCAAAAAAACGGCAAAAAATAA  
TGCCCTGCTTAGTGGTTTATTTCAAAGGTAATTGTGCTAAACCGTAAGACCCCAAAATTCA  
CAATTGTAAAAAACACTGTCTTATCTGACTAAAAATATACTAAGGGAAAGGAAACGAGATG  
AAAACCGTATTAATACTAAAATCAAGGGCATCACCCATTATTAATGCACAGATTCCCGATGGC  
GGGCGCAGACGATACATAAAACGACGTACTGGTGTACCGGATTGGAAGGCAGAGGCAGAA  
CTAGCGTTATACAAAGATGATCATGGCCAAATCTATCAGCCAGCGAGCCATATTGAAGCTTC  
GCTTAAAGAGGCCAGTAAACACTAAAAATACCAGGCAAACGAGGGGCGACCTATTCAAAA  
CTCATTGGTTCCGCTGTCTCTGTTTCCCCTGATGCTATCACTCATTTAATACAGAATTACGAA  
ACAGATAGCCGTCCTGTTGTGATACAGAAAGCACGGATAGTACGCTACAGGCCAATATTTAA  
GGAGTGGGAATTGGAATTTGAAATCAATATTGGAGATGAACAAATCCCTATAGAGGTTATC  
AAACAGGCTCTCGATCATGCAGGGCTATATGTAGGTATAGGCGATTTTCGCCCAGGACGTGG

AGGAAAATTCGGCAAATTCATGGTTGTCAGATTTGAAGAGAAATAATATAGTCCGTAGCCCT  
GCGGGTTAGTCAGGTGAGGTATGGCTCGGCTTGGTTGGGCGTGGTATGGTCAGGTACGGTTA  
GGCACGGTATGGCAGGGTAAGGTTTTTAAAAATTACACGAGAGGAAATACTCAAATCTGAT  
CTTGAATCGGGAGTTAAAGAAAACCTTCTTACAGCTGTTGGGAATAAACACAAACAAAGAGT  
AATTAGGAGAGGGCGAAATGGTTACTGAAACGAAAGGGATATACGAATTCAGCCTGGCTGT  
AGATGCCATGACCTTGGGCCAGCTGGGCCAGGAACTGGATAAATGCAGCCAAGAAGCTGGGG  
GGCTGTGAATATTGCTCACAAACAGGCTATCTGTTTGGATCTATGGCTGCACCTGGCAGATAC  
GGTAAAGGATGATTGTGCGTTAACTGCCCCGGCAGTACACTGTATATGCTCTAGATTTTTAAAA  
ATATTAAGGCCCGACGGCAGATGATCCTGCCGTTGCTTATCGCCTAAGCGCCGAATAAAGAC  
CCCAGACAGTACCCGCACTAATAGGGAACAGGAAAAACCATTTAACAAGTCCGGCTGTACC  
TTCAAGGAATGAGTAATTCCAGAATAGTAAGCGTGGTATCGCATAACGTAATAAACCCATAA  
ATACCACCTACCACATTAACAACCGTAACGAACAAATTACCGATGGCACTATCTGAATACTG  
CATAACCGAAAACCCAAGCAGGGCATTGAAAAATGACTGTTCTGGGTCTCCAAGCCAAGTC  
CCCTCAAATATCAGGCACATTACTTGACCTATGATATAGCTATAAACAATCCATACCAGCCA  
TTGCGGTCTCATTAGTAACTCGCCAACCTTTCGATTTGTCATTTACCGATAATCACCCTGCA  
ACAGGTACCAATACCCACCATGGCACACCTATAGTCGCGCACCAGAAGACTTGCCAAATGA  
GCCCTGCAACTGCACAGGGTAGTAATTTACGCGTTAAACCAAATGATAGGATAGTAATTATG  
GCCCCGCCGCAAAGCTAGGCTAAGCCAGAGAAATGCAGATGGGAAATTCATCTCTTCCA  
GAAAATCTGTAATCTGCTGGCCACCGGGCAGGTTTTCCGGATGCAGATTGACATACCACCCG  
GTCGGCATAGTACCCAGATCATCGTCTGTACAATCTCAACCGCATCTTCGTCATCTCCCACA  
ATGAAGGCTGACTGGTTGCAGGCAGCATAATTAATCACGGCCACGCTCACATCTGCGTCAGT  
GGTTGTTATCCGGAATGAGGGCGTGGCATCATTACTATTCCCGGATAGATCCGTAAATGTAG  
TGGCGTATTGCCATTCCCACGAGCCTTTTAATACCCACCAACCGTTATTTTTGCATAGTACA  
AATACGGCATTGATCCGTTCTGGGTAAAATACCAGTCATTGACATTATCAATTATAGAGCCA  
GCATAAGCGGCAGAATCTTCCAATATATTGTCAACGTATAAAGAAAATGTTCCCCCGGATAA  
AACAGTTTTTACTGTATGGTCGCTAGATACTATTCCGGTAGCTGTTAGTGTTACAGCAGGAGT  
ATAGCCACCTAGGACAAAATAATAATCAAACTGCCTGCTGACCAAGTTACTCCACTGTTCCG  
TTGACGAACACTTAGTTCCATTGGTATAAACATCTGCATTTTTTTGACCACACTTTAATATAAT  
TAGAAGCGTCTCCAGTCGGGCAAGAGAACGCCAAGGCATACGAAGTCCCGGAACCTAATTT  
AGCTGACTGGCTCAAATAAAATGTTTGGAGCGCCAGCTGTCCCACTGATAGTAGATGCGCTAA  
TTGATCCAGTTGCAAGCGCCGTACCAGTTGGAACCTCACCAGATACGGCGTAGATATATACA  
TTAAAATTCCCGCCTGGCGCTATTATTTTTTCGCACCATAATGTAATACTGTTGACATATATA  
TCGCTAATAGGAATAAAAGTTTGTCCATACCAGTTTGTCCGTAGACACTGGATGTGGTGCC  
TGAATAATATGTGGCTTGGCTAATAGATGCTGCTGATCCGATTAGCGCAACAATTTCCGCTG  
CATTATTCGGGTAGCAGATATAAGCCCCGCCTTTGTCCGTTATTAATTTGCTGGTCCCGTTGG  
ATGTATTTATATACCCACTTAACTCAATTTCAAATCACTCCCAGCTCCAAGACGCAGAA  
TCAACAACGCTCATACCGGCTGTGTACAGGGAATAGGCCAGTTTGCCCCCATGGCAGTGTC  
GCCGCCGGTATAGAGGTTGTAGTTAATAGCGGAGTTCTGGCTGATCTGCTCAACCCACATCA  
TCCAGGGGTTGCTGCCATAACCGGGCATAAAGGCAATATCTACCCCGCCGGAGTCTCTTAAT  
GCCAGGTTAGAAAAGTCTGGATCTATATAATAACCATCCAGCAGGCTCTGGGAAGACCAGA  
TAAATGGCACAGATACCTTCTGGGCGGTATAGCTGGCATTGTGGCCCGGATATCCGCCATA  
TAGATAGCATCCGTAATAGTTGAGGCCATGATCCGTACAGCCCCTGTAATGGCCACCAGGAT  
AAAAGGAATAACAGATACCAATAATTTCTTCATGCGTGCCTTCCCATAAAGACATAACCGGT  
GTAAAACGCGTAAATAATGGTAATAATCGCTAGGATAACCCCGTTAAATAATCCCATGGCCG  
TACCACCGCCAAGATATAGGAACCGGCTATCATAGCCGATTGATTATCCGAGTATTTAAAT  
TGTGACCAGCCAAATAAACTACTACTAGAATCAGACAAAGCAAACCTGGTAAGTATCTGCC  
AGCTGACAGCGTTATTAATATATCAGCCAAACCTGTTAGGGCATCACCCACCACAGTGCCA

TTCCATTGTTCTGCCAGGTAGTAAGCATATCAGTGCCCCATGTCCTTCTAGTAAGGTCTAAC  
CCTTGTGCTTGGGTGGAATATATCTTGGGGCACATAGTCTGTAATCCGGGGATGGTCCATT  
ACCATAAGCAGCTCCGTAGTCATTA AATACCGTCCCCTGGTTGGTTTTCGGT CAGTAATTTAAC  
TGACCAGTTGATCTCTAGAGTCCGGCAGACTTCTATAATCCAATTACCCATCAGGGATTGAT  
TTTCTTTCTTAGTAGATAATTGGCTGTAATCGGAGCCAGTCATAGTGTAGTTAACTTCCGGAG  
GCGTCACCCAATACTGAGGGTTC CCCACCATTTTGAGTACCAGAGCATCTCCCAAGTGGGA  
GCATCAGCAACTGCAAATAGAAGGCTGAATACCCATGTCATAACCGGCGTTGTTATAGGC  
ATAAGGCTCAACCGTCCCAGCTGGGTAACGCCATCTGTATCCATAAGGCGAAAATGAAAG  
AGCTTGTGGCTGGAGTAGTTGGCTGCCCTGATGAATAGGCAATAGTGTACTTGAATGCTAT  
CAGGGTATCACCCGTCTCAACAATGTTATGGACCGCTTGAACATCATCCAGGGTATAAGTAG  
TTGGAGTAGCAGGGTCAACAGCCAATACCGGAGCAGCAGTAAATAGCGATAGTATTATGGC  
TATTACTGTTGCGAGGGCTGTTCCGGCTAAAGACCTTCGTATATCTTCTGCGCATCTCTTTATC  
ACCATGAACGACAGGGGGTCACGGGGAAGGCATCGACCACGCCTCCAGTTAAGCAATGTAT  
TCCTGTGTACCCAGCAGGTTTTGCAAGTGC ACTGGTACTGCGATGCCAGTGCGAAAGGATA  
AGTTCTATATCATCTCTAAAGCCTGAGATATCTCCCATAGCTACACCTACCACTGTTAGCCTG  
ATCGGTTTTACCCTTTCCTGTGTTATCTCCATGCTCTAAGTCTACCGACCTCTCAAATTAAGT  
AAAGGCAATTCAGGTGTTTAAGGTATTTATATTAATTATTCATATACCCCTCAGTGATTTCCGA  
CAATACGTTGTGCGAATTGGGAATTTAACTGGTTTATTATTCATCTCAAAGCCAAGTTTGACT  
GAAAGGAGGTGAATAATTTGAAAGTATTTGGTGC ACTTGC GGCTATATTTGGAGTCATCCTC  
CTGTTAACTTCATGCCAAATCTGACTAACTCTACCCATGATCTACAAACGGATGCGGCTAC  
CCAAGCTTTTCCTGCCGTGACTACTGGAGCCGGTGAGACAGCTGCTGATGTAGTACTAACTA  
CAGATCCTTACCAGGACCGCACTACATCAATAACCGGTATTATATCGGACAATGTATTGGAT  
GTAAACCCACTGGTTGCCGCCACTTATACCACCGCTACCAATACCCTACATGTCACGGGTCT  
GGTAGCTAGTCAATCACGAACTCTGACCATCGCTTATGAGACTGACGCCCTATCGGACTTTA  
CCATGATGGGCACAATCGTTGGTTGGACACCGGTTTTGATTGTAATAGCCGTTTTAGCAGTT  
ATTGGCGGCACAATCATGGCTCTGATTCCTCGGAGAGCATAATCTCAACATTTTAAACAAAT  
TAGTAAAGAAAGGAGGTGAATTGAAGTGAGTAGAATGTTAAATATTGGTGGCGCCATACTC  
GGAATCATAGTTTTGGCTGCCTTTTTCCCCGAAATGACCCGAGCTCTTCAAACGCTGATGACC  
GATGCCAATATCGCCGATTACACTATGTTGCAAACAGTCCTGGGTTGGACTCCGGTCCCTGCT  
CTGGGGCGGCGCTCTCGGTGTTGTAGGCTTCTTGATTGTCAAAGAAGTCAAAGCTTCCCGTG  
GTTCCGCCGGCCATTCTGGCCGCCGCTGCGCTAACTCACTTTGAGCACCTATGTTATTTGGG  
CAGAAAAACGAGTACACGGAATCCTTCTTTTAAACAGAAGACAGCAGGTGTTTGCCATTACT  
CCTGCCCGTAGACGTAGGATGCGTCCGTGATGATAAGTCGATGCAGGGATGGGCATTGCTAT  
CCGATTGCTGCTTTCTCAAAGAAACTCAAATTCCTTTGAGTTGGTATGCGAACGTGAT  
GTAGTTCCCATCTCTGTATCAGGCGACACAGCTAAGCAACAGAAAAACGGTAAAGACATCG  
TCAATCAAATAGGCAGAGAACGCCGTAACAAGCTCATTTTCATGCTGGATCCTGAACTTAAA  
AAGGATAGGGCAGCAGATATCATTCAAACCTTATCTATGGTGGAGGTGCCACTTTGGTTTT  
GATGATGATTATCGGGTTGTTTTCGTCAGGGAGGTTAAAATGGCCATTCTAGGGAAAAGGGC  
CAGCACTGTCACAACCCGTACACTGGTAATAGACACCCGGTCTGGTTGGGATATCGAAAATA  
TCGATTCTGAAATCATAGGTCAATCATGGAAACGCTATTTATATGATGGCAAATGGCTGCCA  
GTGGTTATTCGCGACTATGCAAATGATGGTTCCCTATTTATAAACCTCCGATATTGCCAGTA  
GGTATGGCAACACCTCCTGAAAACTCTACCGGGCACTTATAGCCTGGCCCCCTGTTGTTAA  
ACGTTTCTGTAAATCCATGAGCGATATTTGGGGAACGCTAAAAAAGGCGCCTTAATTGGTT  
TTCTGGCAGCTATCTTGGTGGCCCTGATTTTAGTTTGGGGTTCTATGACTGGAGGATGAAATG  
GTGAAGAAAAATAACAATACAAAAGAAGCTATTGAAAATACGGTACCTCTTGAAGTCACAG  
GTATTACTGAAAATCTACCGCCTGAAGGTACTTTTGATGCGTCACCAGCTCCCTCTGGTGGTC  
TAACTCGGGAAAAACTCGAAGGCATGATGACCCAAACCAGTATGCCATCTATCGTGCGTGA

ACTGCTGGAAGCTGGGGATGATCCAGAAAACTTTGGATGCGCACGATAATAATGAACAGT  
AAGAATGCGGAGGCTGAGAAAAACTCGACGCTGCTCTTGCCTATTTTCGATTTATGCGTTGA  
ATTTGATGATAAACAAGGTATGGATTATCTGAGACGCAAGCTTTCCGGCTGGGCATCAATTA  
ACGGTGC GGCTCGGGAACAAGCTGTTGCTGCGGTTACCGGTGAACGTTTTAGGACGCCAAG  
CCTGGGCAAACGGTAACAATCCACCCCACAGGTAAACTATAATGGTTGCTATTTGGGGT  
TTTATTGGCCCGGAAGGCGCTGGCAAACTACTGCCATGACCTACTTCATGGAATATCATAT  
GGCACTAGGGGGTGTTTGCAGATCCTTTCCGGGCTATACCTTGTATAGCCCTAAGGGCAAAT  
TGGTAAAAGACATCGATCTTAAAGAGCTTATGTTGATGTCTGGGGAGCTTAAAAATGTTGTT  
GTGGGAATTGACGAAATTCAACAATTCAATGACTCGTCCCGTCATATGACCACTATCAACCA  
ACTGACAGGCTATGTTGGCATGCAACGTCGCAAGCTTTCTCTCGGCATCTTTTATACCTTGCA  
GAACTGGATGTGGCTGTATGACCGCATGCGTTGGTAACTCATTGTTAACAGTATGTTCTGA  
TCTGACTTCTCTCCCTGGGGTAAGGAAAACCATATACGACAAGGGCAGTATATGTCTATCG  
TCACTTACGATTGTAAGGGTTTTTGACTGGCCAGCCATGGTCTCAATTATCTCCCATGGTAT  
TACGTCCTCAAGAACTTTGGCCTTATTATCGCTCTTATAACGTATTGGATATTTTCGAAGGTC  
AAGAGCGTATCCAGATCAAAAAACGCTGACCGTTTATGATCTTAATAAGGAGAACCCGAC  
CTTCGAACAAATTAGAGATGCGGCAGATCAAACACCTCCGGTCCGATTAAAAACACCACGA  
ATGACTGATGATGAAATGGCAGTATATCAGCGCTTGGCTGACCAAGGTGTTGATATGAGTAC  
TATCCGCGAAGTTCAAAGAATGAAACAAGGAGTGAATTATGACACCTGAAACTGCTCAA  
TTATTGCCGATGCCATTAATCACTGGGAGCTGCTCTCGGGCAGCTCTCGGTGACTCTATGA  
GCGAAACAGTCAGCACAGCCATAAACGCGGGGTTTTTAAGCTTGGCGGCTACGTTAGTAAAT  
GTATTGGTCATGATAGCTGTGGTAGCTGCGGCCTTTATCAAACATGATGCTTGGCTCTATATC  
CTGGCAGGAATTTCCGTCACGCTGTATGCCTGGGGACAAATGGACAGTGGCATTGCTGGGAA  
TACTATATTGCAAAATTCTCCGTTAATTATGCTGGGTTTGTATCTAATCGTCTCGGCCGGAGT  
ATATGCATTCCAAAGTCTCCAGTCGAAGCATCAAGATGGAGGTTAAATTATGGGTATATTAT  
TAGGTCCCAATCAGGGGTCTGTAAATGGGCTGCTTCGGAACGGCCCGCCTACACCCCCTAAT  
AACCAGGTGGCCATTAATGCCGCCCGGCAAGCAGCTGAATCAGGTGTTAATAATATTACCAC  
AGTTAAGATGCAGGATGGCAAATGGACAATTACCACTGACGGAGCTGTGTATAACATCGAT  
ACAAACGGCCAAACAGCAGATACCGTGCAGTATATAACCAATTATCTGACTAGCCGCGGGG  
CATCTGCGGATATTATCAAATCAGTTACAGAGCAGATTCCCATTATCACGACACGGGAATCT  
GGAAACGTCGTTAAGAAAAAAACCAGTGCAACTATCACAGATCCTAATGATACCACCAAGA  
AATACTGCTGAACCTGTAAATGAACCAGCAAATGATTCTACCGGTGAAGGTGATACTCAA  
ACTAACACCGATGTTTCGGTACAGTGGATAATTCTACGGCATGGACGTTTACTACCCCTAA  
CGGCACAGTCTACACCGTGCCCATGGCGGGCTTAGCCTGGTCTGACCCTGCCAAAATGCATG  
AACATATAACAACTACCTGAACAGTATCGGCGCGCCCGCAAATGTCATCATGGAAGCTGTT  
AGCCGTATGCCCGATGTAATGGGCGATACAGGCTTGTACAGCGCCCAAACCTGACGAATTTGG  
TAATGAGATAGACAATACTGAAGAGATTA AAAACATGATCGCAGGGAGTGACCAATCTTTA  
GCTGCAACAAACGCTTTAAAGGCATTCTTAGACGCTAAAGGCTTTTCAAGTTTGTCTCTGA  
AGATCAGTTTAAAAAGGCTCTTGAATACGGGATAATACCGGCTGATTGAGTGTATGTGCCTC  
CTGATGCAGGTTTTGAACAAGGGCAGAATGCTCCCGAAGGCATGCCTGATGATGTCGCTGTC  
AGCCTCGGTCTACTCCCAAATCCGAGCAGATTGAATTCAATATGCCCAACTTTAACTGGGC  
GTATCTGCCAAAAGCCGATGCAGATAAGTATTTTCGCTGAGCTTGAAGCTATTGTTGGCTATG  
CAGTAACCAATAAAAATCTTAAACAGGCTATCAGGGAAGCCAATGCTACCGTAACTAGGGA  
AGCCAATGCTGCCAGGTCAGAGGCAATTGCATTA AAACCCCTTCTTAAGTTCTACCGGTGATA  
ACCAAACATTTGACATTTTTGACGCTACAAAGCGGGTATTCCGATAATGTTATTGAGAGA  
GCAACTGGTCTGTCAAAGGCTGATTCCGTAGATATCAAATACATGCTTAAATACGTTGATGA  
CAAGGGAAACGTAGACATTCAGCAGGCAAGTATCAGATGGTTGGGGAAAAGGAATACTTCAA  
CAGTGGTTTTGGTCTGTCCGATGCAGATTTCAAAAACGCTGAATTTGCAGCTGATTACGAAAA

GGCCACCTACCTTGAAAAATAGGCATGGCCTACAAAAAGACCCGGGTGAATTCCTTAAG  
AACATGGGTATTGCCATGATACCTATAGTTGGGACGTTAGCATTTTGGGAAGATAAAGAAAA  
AGGAACTCTAGCTGATGACTTCACATCATTATCGAATTTAGGCAGTATTGCTCTTGATATCGC  
AATATTTATACCTTTTGTAGGAGGTGTTTCGGCCTTAGCCAAGACCCGGCATCGGCGTTGGCA  
AGGCTATTGCCAAAGAGACCCTCATGACTACCCGGGGGCTTATTGTGGCTCCTATCACAACC  
GCTCTGCACCCGATAGCTACTACCAAAGCCATCTTCTCTCCTTTGGGTGTACTIONTAGTAAA  
GTAAAGCTACCTGCTGCGACATTCTGGCGCGGCTCTGGCAGTCAAACCATGGATATAGCCAA  
GGTGTGGCTAACCTGCCTCAGTAGAAACAACCAAAGCTATGGATGAAGCCCTTCTGCTAC  
GGAATGGAGGTAAGGCGTCTGGTTCAGTACCTATTACAGTTGACGGCATTGAAATCGGTAAA  
ATCAAATGGTCAGATGCCGGCTTCCAGACCGTATTTAACAATTCATGGGGCATTCCACTCC  
CTTTGGAGAGCCATTCACTAAAGGGATTATGGCCCAAGACGAAGGCCTGTTTCTAAGCCCA  
ACATGAACTTGGGATTGACATCCAAAAGTGCTACCGGGCAGGTACCCGGTTATGTCTTTAAT  
AACAAACTCTGGTTGGGCAGATTGGCGAAAACGGAAGGCTGGTTGATAGCCATAATAATG  
TTATTGGCCAGATTGCAGACAACCTCTAAAGCCGTATCAATAAAAAATACCAAGTTAGGCACT  
GTATCCGTAGAAGACAATAAAGCCTATCTGATACGGCCTGATGGTACGCGGGTTGAAGTCA  
AACTCCAAGCTGGTGGGGCTATTGTGGCTGATAATCCTAGACTGCTGGGAGAATTTTACTTC  
GGTCAGCCAGTATATAAAAACGGCAAGAAAATCGGCACTATAAATGGCAAGGGTGAAATAG  
TCGATTTAGACGGTAAAGTAATAGGTAAGCTTCTCAAACGTAGTCGGATTTCTGCCTCCC  
GGTACCAAGGTCTTCGGTGAAGGCAAGGTGGTAGTAGGGCAAATTAAGAGACTCCTACCT  
TTGCCGTTATCTACAATAATGGTCTGTACGTCTGCCGGATGCCGTTTCAAATTCACGGACTA  
TGGACGAAATGGCCGCCAAAGCCTGGGAATACGTAAAAAGTGATAAAGGCCGTAGGTGAAAC  
CTTCCCTGTATTTAAACAGTATGCTAAATATATAGAAGACGAAGCTGTCATGGCCAAGGGTG  
GGCGTGCTATACCCGTGCTGGATGATAAGGGAAAACCGGTTGTATTAATACTGTTGGCCCC  
GACGGCAAGAAAATTAACGTTCCCCTGCTGCAAATGGTTACGCCAGACTGGTTTGAAAAAA  
GTCTGGAGATTACCAAGGTACTCGCCGGCAAAGCCGACACCCTTAACCACGTCCCCTCTCG  
CAGGTACTTGAAAGGTTGAATCCCTGCCTAGAGGTATGGATGATGATTTTCTGGCTTATAT  
GCGCCGAAACCCTGATAACGTCCTGTATGGCAGCACAGCCGAGTACGCTTTCACCGGTGGCC  
GGAGACCCGGAGACCTGGATATCCAGTCTCCCACACCCGGAGAAAACCGCCCGTGATATTGC  
GGATATAGCTCGCCTGCATACCTCAAATAGAATCAAAGTGGAGAAAATTGCTACCCACTACA  
CTGTCTCCAGCTTAAAGACGGGCTGTGGAAGAATATTGCAGATATATCGGAACTAGGTTGG  
AAAAAGACCGATGCCGGCTTTAAAAAACTGAATGCCCTATCAATACAGTCACGGTTGAGG  
GTGTTACTATGGAAGCACCCAGCACCCAGCTTTACAGCCTGTTAAACCGGACTGTGGCGAAT  
TTTGAAAAACAAGAGCGTTTTACTGCCATGGTCAGCAAGCTGGGGGGCGAACTTGACCTAG  
GTATTGGCGCTAAAGCCCCGTCACTGGCAGATCTGTACCGCCTGAAGGCCAAAGGCATCTAT  
AATACTGTCCGTGATATATTCGTGCCAAACTTGCAGAAGAAAATCAATTATGAAGCCTTAGC  
CAAGTCCAATCCGGAATTATCAGCTAAAATTGAGAAGGTTTTTAATGCCAACCCGGAGGTCC  
AAAAAGCCTTGCTGGCAGAGATAAAAGAAGTCTCCCCAAACTAGCTTCCGAACTTGAAAG  
TTTACTAGCTGACAGCAAACCTCTCAGATAAAGCCCGTCTGGCAGCTGCCCAGCAGATAGCCC  
CTGACCTGATACCGGAAGTAAGGGAATTACTACGCGCAGAACAACGGGCAGGTTCTGCCGC  
TCGGACTGCTGCTTTGACTACCGGCCGTGATGGGCGGGCCAGTGCCTTGGTTTTAGCCGGCA  
GACTAGCCAAGGTAGCTGCAATGGAGAAGGTTCTGCTTGAAGAAGAAATAAACCGGCGTGC  
CAAGCTGATAGAAAAGGAACTCCGCAAGTTACCGGCACGCATGCCGGGCATTAACAGCCTG  
GATACAACAAGAGTTACAGCTAAGACGTTAGAGAGAAGATTACGCACAAGCAGCGGAGATT  
ATGCCAGTCTGCGTGCCTGTACCGCCATCCAGAGGAGAACGGGTACCGCCACCTCGTGT  
CCCACCGGCAAACCGCCTAATAACCTCCGCCGCGTGTAGAGCCGTCACGTGTCAAACCGCC  
AGATTTTAACTACAGAGGCGGCAAAGGACACACGGATAGCCAAAAAGACAACGATACCAGC  
AAACCAAGACTGAACCGTGGCGATGTGGCATGGAAACAGGGGGAAGTGGGCGCCGGTGATG

ATAAACGCCCCGTCTGGATAATAAAACGTGCCAATGGCACTCATGAATATGTTTTCCGTCCG  
CCGGAAGGGGCGACCCGCTTGGAAAGTACTCCGGCAGAGACTTTCTTTACCAGAGGTAAAA  
AACCTCCCAAAAAACTGACTCAGGAAATGGGCGTTACCACTGCCAAGATTGACCTTGAGCG  
CAACCCGAGGATTGATTTTCATAGCCACTACGGCGCCCAAGTTTAAACCCTATATTCCAAAGA  
GTGTTTCGGCGGTCTATAGGTATGTGACAAAAGTGTGCGCAAATATTCTCGGATATAAGAAAAGG  
CCGAGTATTTTGCTCGGCCTTTTCTACTTCCTCAGTTTTTATTACCATACATGCCCATCTTTGA  
GGGATGAATTCTCCGGGATTTTGAATATCTGACTGATATCATACTGAGCCACTTCGTAACCA  
GTGTAAAACATATTAGCCATGTCTCCAGTTCACTCATGGTAGTTTCTGCAACAATCTCTCTT  
TTGATTATATCATCATAAATTTGGTAAATGAGATCCTTTGTAGCATTTCGCTGAAAGCCACGCC  
TGGGGTGCTTTACAGAATCCGGCATCCATAACTGCAGTAATACCCATATCCTGTAACAAGTA  
AGGGATATATTCAAGCTTCACTTTATCCTGTGGGCTATACGGCCGTTCCCTGATACTCTTAGT  
TTTAGTTACCATCTGCTTTACTCCTATTAATCCTAATATTTCTATAGTATACTATTATAATA  
CTAGGAAATCAATAGGATTATTGCGCATTAAATTAAGTTATATGATATTGCTATGATAA  
AAACATTGAGAGACCATCGATTAGATAAATTCTGGAGCCAAGCTGAGTTAGCGAAACAAGC  
GGGTATCGGAGCGGATACAGTTAATAGACTCGAAAATGGCAAACAAAACCCAAGTTTTATT  
ACTGTACGCAAATTTGGCCACTGCCCTTAAGGTAAAACCAGAGGAAATTGAATTCTAATGTGG  
GATTGGATTGTTTGGGTATTTGTTGGAATTCTGGCTTTATCTGGAATTGCTGGCATATTATCA  
CTAGATACTAGAGGTAGATCATTACTAGGGCTTGTCTTAATTGTTGGTGCTATAATTTGCGCT  
ATCACTGGCGTTGGAGATAGTTGGACGCCAATATTACTTTATTTGATCGGCGGATCCGCATTT  
ATTATATATAACCTCATCAAATGGGGTCAGCTCCGGGATTACTACTGGCTGTGGTGTATGGA  
GACAGATGAATTTCTCGGCCCTTCAACAACGATATTGAGATAAAACTTTTTTCAGCCCCCAC  
ATTACCTCCCAGGCGGGTGGCAAATCTTCTGGATACCGGCCAAAGACCCTCTAAAAGCAACT  
AAAATCATCCGCAAGTGGGTTGCAGATGCCGAAAAGTGCCTGCGGAAAGACCCTGAATACA  
AAAACAGAATGCCGAAGTAATACTTTTAAAGATATTTAGGATAGGATGAAACAAATGGCAA  
GAGTAAAATGGAGTGGGTTTATTCACGAGCAAAGCACCCCTAAACGGTACGAGTAAGCTTGT  
AACACGGAAATTTAAGGTTTGTCCAGTATGTTTAAAGTACCTATTTTGAAGCATCATATCAAC  
CTGGTTTTTCATCCGCTGGCCAGATATTATTGTAAAAAACACCACGGATTCTTTTTTATGCCCA  
AGACACAAACAGAAATTATCCGAAAATAATAAGGAGATCAAAATTATGTTAGACCCACAAG  
TACAAATTGAACTACTTAAGCGAACATGGGACTTAGCAGGTATTGAAGCCAACCAATACGA  
AGATATATCTGTTTCGGAGAAAAAGATTTATAGATGTATTTCGATAAAACTTACACCCTTTGG  
CTACCATTTTAAATAAACCATTAAATTCCTAATAATAGAATTAAGTTTTTATTTGGTCTGCGGA  
ATAAATTAGGCCGGATTAAAAATCCGGCCTTTAGTATATCTGAAGTCTTTATTTAGTTACCAT  
ACCTATCAATAAGCTCTAACAACCCATCCCTACCAATACCCTTCAACTCCAGCTATAGCTGC  
AAATTATCTACCGGGCTTGCTTGCCGGTGGACTCTCATCATATCTTCTGTACCCAAAGTAGAA  
GTATAACGCCTGGTCATAGCAAGAGTAGTATGCCCAACATGATTTGCAGGGTAAACTCATC  
CCCACCATTACGTAGATAGTTTATAGCTGCCGTATGCCTGAAAGTATGAGGTCCTGGCTTAG  
CATCAGTGATATTAGCCCTCTTACAAAGCTTTTTTATGGCTTCCTGAACACCACGACAAGTAA  
GTGGTCGACGTTCTTCTGTAAACCATAAACATTGATAATCATCATCCCTATTAAGCATATACT  
TTAACAAGGCTTTTTGGGTCTGTTTGCCTATTTCGAACAATCCGTTCTTTTGACCCTTTCCCAA  
ATACACGAACAGTTTCTTGATTAATAATCGATGTCATTAATATTAATGCCGGAAATTTCTGCTA  
ATCGTAACCCTGTATCCATAAACAATAATTTAAAGCACGATTGCGTAATCCTAAAAAACTT  
GTTTTAGCATTAAACACCAATAATTTTTTATGTCCCAATTGAGAAGGGCTGGATTACTTTC  
TTATCTAGCCTCGGAGGTTTTAATGTGCGCATTGGATCGTTTGCAATATAAGCCTCTCTCATT  
AACCAATGTATAAAGGCTTGGAGTGCACGATAATATGCATTACAGTGTTATTCCCACACC  
TTTTTCTTGCAAGGATAACAGGAATGCCCGTATTAATTGAGGAGATATTTTCAGAGGCTAACT  
GGAGACTGAAGCGATGACAAAACGACACAAAACAGTTAACACGCGGACGGTAAGTATCAAC  
TGTTTTTGGAGATTTACTCTCTACTTTACATGAAATTAAGTAAAACCTCGAGGAGCCTTTTTAA

TTCATTTGATGCAGGACTGTGCTCTATGGCACGAATGAGCTCATCGTAATTAATGTTGTCAG  
GACTGTGCTCTTTCAATTCATTTTCGGCACGGGGAAGGCTGTTTTTGACTGTTTTTAGCTTTAT  
GGTGGGCCATCTTGGTCTCGAACCAAGGACCTCAGTCTTATCAGTTCCAGCCTTTAAACCA  
GTAATCCTCTTTTAGCCGCCTCCTTTAGTG

>Dmc\_IME1-3

GGAGCCGGAGGGATTTCGAACCCTCTACCTTTTGACTGCCAGTCATCAAAGCTAAAACCAAGC  
ACCACGATTACCTATCGGCCTACTCTACTTCTCCTTAATAAACTAGTTTTTTATTGACTTCGAT  
GACTACTGCACTTGCCTGGCATTCTTCTAAAGAATGAAGCCCATGTCCATTTTTTAAATATAA  
TCTTCCATCTTGCTCTATTAATTTTCTACAATAACCTCTCCATCCACTACACAAAGGACTAT  
ATCCCCTTTTTTGGGGGCTCGGTCTCGGTCTATAAGGACAATATCTTTCTCACTTATAATCGG  
CTCCATACAATTCCC CGTACTTTGTAAGCCTCTATATTTGGAGGAGCATTACTTTCCCTTGC  
TCTGTATATGTAATCAATTGGTGCTAACGCTGGATCTCCAGCATGTACGATAAAAATTATCAT  
ACACAGGTATAGAAACAGGAGCCATAAGTTGATATTTTCTTAGTACTTCTTCAGGTGACTCT  
ATCCTAACTGTTTCAGGATATGATTTGAACTCTTTGATATCAACACCAAGCGCTCGTGCAATT  
TTAGATAATGACTCATAACTTGGCATAGTACTTTTACGCAGTTCAAGCATCGAGATATAACC  
GCGAGTTAAACCACTTATTTAGCTAATTTAGCTTGTGTAATTCCACGCGCTAGTCTTAACTG  
TTTTACTTTTAAATCCTATTTGGATATCCATAAATCCCCTCTGAAACAATAGTATCATAACTTG  
ACCAGTATTTGCATGATATTGATAGGAAAATGGAGATAATAAGCAATGTACAATACTTTAGC  
ATGTTGCTACTATGGTATTATTCGTTCTAACTATCTCTCTACGCCTTTGACTCTCTGCACATAC  
TAATGCAACAATAGTTGTCATGAATAACATCACTGTGCAATTAATCTTCTAGATGTCTTAAT  
CAATTTACAGAAGGATATGAAACTAAGTAATACAGCTTTTTCGAAAAAGCTTGGCATTAATC  
GCCAGTTGTGGCAAATGACTAAATCAGGTAAGTACTAGACCTATAACCTAACAGTACTTAAAGCC  
ATTATCCGGAACCTCCCCATCTAATCCCAAATGTAATAGTCCATATGGGCACTAAGGATAT  
CAATGAAACTGACTAAGCGCGACTCTGGACGTATTGGGGGAATTCAAACCGCAATGCGCCA  
TGGAATAATCACATGAGGGAGATTGGCAAATAGGAGGCCGTCCCCGGGCTACTAACTGG  
ATGGATTTACAGGTGTTACACATCAGAGAGAGAAAAGAGAGGGAAGGAAGAGCTACCGAC  
AGCCTTACACTATCTCAGTTAAAGCACCTTGTGAAAAATGCAATGGAGGGTGGCTACTAGTC  
CTAGCCTACCCTCCAGAAAGGGGAATGAGGCAATGCCTCAACAACAAGTAACCTATCGTAT  
CAAGAACGAACGCACCGGTCAATGGTGGGAGGGAAAGGCTGATAGCCGATAGATGCCATG  
CGGAAAGCCTCCCTCGAATACCCGGTAAAAAGCCCTAAGTCCGGCTGGACAGCTGAAAAT  
GCTGGGTACGTCAATGGTGTCTGCTGGTTATGGCTCATGGGTAACCCAGACTATGTCCGCA  
AAAACAACAGAGATGGTGAAGCATGAAATCTTTCCACGTGCTTACCGCGTAGCTAAAAA  
AGAACAGGAGAAATAATATGCCTTATAAAAAGATATTTCCCGCCAAGATAGTAAGTTTTGAC  
CCTATTTTTGGAATGGAACGTGATGGTCTTAAGTCATTTATTACCGTCACAGCATTCTATG  
GATGCACCGGGCAATCTATTGTTGGATGAATTTCAGAAGTCAGAAGTCCCTATRCTGATAAC  
ARTCCATAATCCCCAAACCGGTCAATCATTTAATGCCTAYGYAACCAAAGTTGTGCAAAATT  
CTCCC GCCYGTACTGGAATACCATCCRTATCGACATAGAACGCATACTCAGAGCAGAAGAA  
ACGCCAACAGCTATGGCAAGCTACCCCAAAAAGGATGACCTTAATGACTAGTGGAATGGTT  
ATCTTGGCTGAGATACGTACCGAGACTGAACAAGGCCGTCCC GCCCTACCACGGGCTGGG  
AATGGAGTCCGGGCTGTACCCGCTCAGAGACCCTTCCCCTGGCAAATGGATTGTTCCGGCGC  
ACAGCAGACAGCTTTGATGTGATGTTCCGCTCATATTTGACTCCTGAACTACGCAGCGGTGG  
CCCTGAATACTGGATAGGCAGTTTTAACCCTACTGATACGGGGGAATATGTAGCCCGTGAAA  
TGGCAATCAAACCTACGTAATGAATCATACCGACAGGAGGCTGAACGCAATGGCCACAATA  
CGTCATCTAAACCAATTGAATTGTCACCCCGCCGCTACCGCAAAGGTAATTATATGTTCTGC  
CCAGTAAAAGCTGACCGCAATTACAAGTGCCCGGAGTGTGGTTGTCTGGTACAGCCAGGGG  
AAGTTGGATTTACCCGCTTAAAGATTATTCATGATCTGGTAACTGAGCCTGTCTGGGATGTAC



TGCATGCGTGCTGCGTGGAGGCAAGGGAATGATAAGAATTA AAAATTGGTCATCTAACGCTCT  
CTGCGGACCTATCTCAATCCGGAGATGTAATTATTACCTTGAGGACTGAAGATGGCACACCT  
GTTGCTGCCGCAACTCAAAGACACTTATTGCCGCTATTGAGGCACTGGAGAAGACAGCGG  
AATAACATCCAGGACGGACAGGGGAGTGTGATCTCCCTCCCACTTCCCTGTCCGTCCTTAAA  
AAACACAAAGGAGTGACATATGGTCGTATCAAACTGAGTAAGAGACCAATTCTGCAAACC  
TACCCTTGTACCCACTGCGGCGGGGAGACCGAATGGGATTTTGACCTGGGCTCCAATCCACT  
ATGCGCATACTGTTGGGACAACAGTATAGAAATAACCGTCAAGGTTGAGCTGGCTGATAAG  
ATGCGTGCCTACYRCCAAGCATAAAGGTTGAGCTGGCTGATAAGATGCGTGCCTACTACCA  
GGAGCATAAAGGTTGAGCTGGCTGATAAGAAGCGTGCCTACCGCCAGGAGCATAAAGTTGAG  
CTGGCTGATAAGATGCGTGCCTACYRCCAGGAGCATAAAGTTGAGCTGGCTGATAAGAAGC  
GTGCCC GTTCCGCTATTTCCAATTA ACTAGTCTGAAATGAGGTCCAATATGGTAATAGCAAT  
ACGAAAATATACGATAGACGATATCCTTGCCCGACTTCAGGGCGTCAAAAAGAATGGATCC  
GGCTACATGGCCTGCTGTCTGCCCATGAGGATAAAAACCCGTC ACTATCAGTATGCGAAAA  
GAGTGGCAAGATTTTGATCAAATGCTTTGCCGGATGTAGCTATGAGACGATCATGTCCGCGT  
TGGATATGCCTGTTAATGATGCAATGCCAAA ACTGCCAAGCCATCCAAACGCGAGATAAAA  
GCAGACCTATGACTACACAGACAGAAGCGGCCAGTTGATATTCCAGGTAGTCAGGTTTGAG  
CCCAAAAGTTTCTCCAGCGACACCCTGGCGGCAAGACCGGCTGGCTCTGGAATATGAAGG  
ATATCGAGCCGTTATCTATCATCTGCCGGAAGTGCTGGAAGCGGTAAAAACAGGCCAGAC  
TATTTGGATAACCGAGGGCGAGAAGGATGCTGATAACGCCAGGGCTATGGGCTTGGTGGCC  
ACTACCTCCCCGATGGGGGCGGCAAGTGGCGCGATAATTATACTAATGACTTATTGGGAGC  
CTCGCAAGTAGTAGTTATTGCCGATAAAGACGCTCCGGGCGTAAACATGCCTCCGATATTG  
CCATGTCCTGCCGGCGGCAACGATACCGGTCAAGATTATCGAGGTACCCGGCGACGCCAA  
AGATTTTACCGAGTGGTTGGAAGCCGGCGGCCAGACATCCGAATTGGATGATCTGGTAGCTA  
CAGCTAAGAGCTATACGCCATCAAAAACCAGAGCTTATACTTTCTGTCTGATGGCAAGTTT  
TCTATCGAAGCCGGCCGGATTATTTATCATT CATAACAGGGATAAATGTCCCCTACGATGCTCC  
GCTGTGCAATTTCTGTTGCTGCCGTTAAAGAGGAGATCATCAAAGACAATGGCATAAACCGCA  
AAACTTTCTTCAGGATTGGCGGTACAGACTGTACTGGCCGTCCGTTTCCAGATATAGAAGTC  
CCGTCCGAAA ACTTTTCATCCATGTCCTGGGCATTATCCCAGTGGGGAATTAAGGCTATGAT  
CGAACCAGCCCTCAGCTGAACGGCTATTACGCGGGGCAATGCAGTACATGTTCGATGGAG  
GCACCCTGCCGATTATTTATGAAAATACCGGCTGGACTAATATCAACGGCAAGGATGTTTA  
CCTTACTCCCCACGGCGCAATCGGAGCCGATAATGTTGAAGTGGAAATGCCATCCAATATCA  
GCCATTATGATATACCCTCGCCCGAACAGAATGACGATGTGAAGTCCTTCATTGAGGCCAGC  
TTTAATTTCTCAAAGTAGCCAAGTTATATATTACCTTGCCGCTGTTTGCGGCTATGTACATG  
ACGCCTTTGT CAGACGCCATTGATACCAACTTCAACCTCTGGCTGATTGCCGGTTCTGGCAGC  
CTTAAAACCAGATAGCATCACTGGCACTCTGCCACTACGGAAATTTTGATTATACCTGTGT  
GCCGGCTGCCTGGCGGGATACTCAGAATACTGGAACGCATCCTGTTACCTGCAAGGATA  
TGCCGGTGCTGGTAGATGACTGGTCACCCGGCCAGACCACCGCCTCACAAAAGAATTTGAC  
GCTAAGGCTGACTATGTATGCCGCGGACAGGCTAACAGACAAGGCCGTAAGCGCATGTCTG  
CCGATACATCTATGAGGCAGGAATATGTACCCAGAGGCTTCCTGATATCCACCTCGGAAGGA  
CAACCGCCAGGCGAGAGCAATAATGCCCGTTTTCTGATCATTGAAATGTCAAAAACAGATAT  
CGAATTCCTTGTCTTACCCTATCACAGAAAGAGGACCATCTGTACCGCCGCGCTATGGCTC  
ATTACCTGGCATGGCTGCAAGCGGACTGGCCGGCGAAGAAAGTGTATCTGCGCCAGCGCTA  
CCAAGAGGTTTTTGAACAATTTACTGAGAGTCTCCGGGGTGAAAATGTGCATCTCCGGCTAC  
CCAGATCCATCGCTCTGTTATATATCGGTCTGGAAATGGCTATTCGCTGGGCCGAAGAAAAC  
GGAGCAGCGGATATATTTGATAGGTTTATAGATGAAAGCGGAAACGGGGAGAATGATT CAG  
TCGGGTCTGCGTATCTCTTAAAACAAGCCCGCGAAGTATTTATTGAGATGGCCAAGCGACAG  
GGTGCCCGGATAGATGAGGCTACACCATCGAAAAGTTTGTAAACGCCTTAAATGCAGCCCT

TATAGCTGGTACTGCATATCTGGATGTTAAAGATGGGGCAAATCCTCGGTCTGCTTCACCTG  
GGCAAACCTCTGATCGGTTGGGATGACCGGACTAACGGGCACGTTTCCCTCCATAATGACCTG  
GCCTACCAAGTAGCCAACCAGCATTACCAAAAAATCAATGAGGCTTTTTGTTAAAAAGGATG  
CTGTATTTATGGATCTGGTGAAGCGTGGTTATGTGGATCCGGGTAAAGATGGTAAAACCACT  
GTCTTTGAGTATATCCCGGTAATAGCAAAGGCATGCCGTGTCTACATATCAAACGTGAATT  
CTTGGGGCGGGATGAACAAAAGAGAGGTGAGTAAAACAATGAAAAAATGTGTGTGCGCCCC  
AAAAATATCCCATGTATTAAAAAATGGTGCAAGAAGTGCAAGAAAACCTGTTTTTAATCGTAA  
GCCAAAAATATTCTGAACGTGAAATTTCTTGCACCTTGAGGGTGCAAGAGGGTGCAAGAAG  
TGCAATACAGGTGCAATACAGGTGCAAGAGAAGTGCAAGAAAATATAAAGCTAAATTA AAA  
ATAGGTGCAAGAGAAGTGCAAGAAAATATTAAGCTAAATTA AAAATACATACTCGTAATT  
GTCAATATTTCTTGCACCTCAAACAAATATATATCACTCAGTTTTAGGGTGACACATAAAT  
CGGTATGTAAGATTGTTAAATCATTCTCAAAGGATGTGACATAAATGAAAGTCGCGTTATAT  
GCCAGGGTAAGCACCCGCGATAAAAATCAGGATCCGGAAGTCCAACCTGATGGAGCTGCGGA  
AATATTGCCAGGAAAACGGCATGGAAATAACCAGGGAATATATAGATCATGCCTCGGCCAA  
TGATTTTCGTCCGCAGGACGGCATGGAAACAGTTGTTAGTGGATGCATCTGCCCGAAAGTTTC  
GGGGGTTACTGGTGTGGAAACTTGACCGGGCATTCGCGACATTACGGTGGCCACCTCGTCC  
GTTAAAATGCTGCGCAATGCCGGCATAGATTTTATTGTTACCACTGTCCCTGTTCTTTCAGTC  
CAAGGTCCAGCTGGAGACCTGATGTTTAAACATCTATGCCGCTTTTGCCAGTTTGAAAAGGA  
CACCATTATTGAAAGAGTTAATGCCGGACTTTCAAGGGCAAAGGCTAAGGGTAAGGCATTC  
GGTCGCCCAAGAAAGGCAATAGACTTCAATAAGGTTTTGGAAGCCCACGAGATAGCCTGCT  
CACGGGTTAACCGGATTACTAAAGAAAATCAGGGTTATTCCGAGACGGCGAGGATATTGAG  
CGAGCAGACCGGGCTAAGAATTACAGCCGGTTGGGTCTATAACCGGCTTAAGGCCGGCAAT  
TAAAATGCTTCAAAAAACCCACCCCATTTTTGCATAAATTTTAAAGCCAAAAATCTTATCG  
GATGGGAGGCTTCAAAAAATAAATGTTTTTTGAAGATGTTGAGCTACTAACTTGATACCCAT  
TATTCAAAGAAAGTCCAATTTGAAAGGAATGGCAAATAAATGAGACATCTTAAGGCGGTAT  
GGCAAGGCGGTTTATTTATTGAAGGATTACGTCCGAAAAATAGATTACACGAAAGCCCCGG  
AACACATCATTTAATAGTCACAAAGGCGAGCCCCAATTTGATGACCAGAACCTTATCGGTA  
AAAGAGTAGCAATCCCAGTTTGTGGACCTATGTATTGGGAAGTTATGGAATAAGCGCAAAA  
AAACGGCAAAAATAATGCCCTGCTTAGTGGTTTATTTCAAAGGTAATTGTGCTAAACCGTA  
AGACCCCAAAATTCACAATTGTA AAAAACA CTGTCCTATCTGACTAAAAATATACTAAGGGA  
AAGGAAACGAGATGAAAACCGTATTA ACTAAAATCAAGGGCATCACCCCATTTAATGCA  
CAGATTCGCGATGGCGGGCGCAGACGATACATCAAACGACGTA CTGGTGTACCGGATTGG  
AAGGCAGAGGCAGAACTAGCGTTATACAAAGATGATCATGGCCAAATCTATCAGCCAGCGA  
GCCATATTGAAGCTTCGCTTAAAGAGGCCAGTAAAACACTAAAAATACCAGGCAAACGAGG  
GGCGACCTATTCAAACCTCATTGGTTCCGCTGTCTCTGTTTTCCCTGATGCTATCACTCATTT  
AATACAGAATTACGAAACAGATAGCCGTCCTGTTGTGATACAGAAAGCACGGATAGTACGC  
TACAGGCCAATATTTAAGGAGTGGGAATTGGAATTTGAAATCAATATTGGAGATGAACAAA  
TCCCTATAGAGGTTATCAAACAGGCTCTCGATCATGCAGGGCTATATGTAGGTATAGGCGAT  
TTTCGCCCAGGACGTGGAGGAAAATTCGGCAAATTCATGGTTGTCAGATTTGAAGAGAAATA  
ATATAGTCCGTAGCCCTGCGGGTTAGTCAGGTGAGGTATGGCTCGGCTTGGTTGGGCGTGGT  
ATGGTCAGGTACGGTTAGGCACGGTATGGCAGGGTAAGGTTTTAAAAAGTGAGGAGATAAA  
GGGCGTGGAAGAAGTAGATATTAGAGAAATTCGTTCCCTCTTGCAATCGTGTGTATTTTTA  
AAATTACACGAGAGGAAATACTCAAATCTGATCTTGAATCGGGAGTTAAAAAAGAGCTTCT  
AAATCTGTTGGGAATAAACACAAACAAGAGTAATCAAGAGAGGGCGAAATGGTTACTGAG  
ACGAAAGGGATTCTGAACACGGATAATCTGTTCCAAATCTTATCTGCTTTGATGGATGAGTG  
TTGTGATGAATTTGGGCCAGCAGGAGATGGCTGTTCCGGTGTTTATGCCGCAGATCATGCC  
AGAGATTAATAGACTCGATAAATCAGGACCGATTA ACTATGCAGAAATTTCATTTTATAAA

CGTGAATTCCGCAAATTGAAATCCCGCCGGCAAATCATGATGGATGTGATTATCTCCTAAGC  
GAGGTATATAGACCCACACAGTACCCGCAGAAACGGGATAGAAAAACAACCACTTAGCCA  
GACTGGCAGTCCCGGCGAGGAATGAATAATCCAGAATAGCAATCGTGGTATAGCATAAGT  
CAACAATCCATAAACCCACCAACAATATTTACTACGGTCACAAATAGATTTCCGAGAACAC  
TATCTGAGTACTGCATAACAGAGAAACCCAGCAGGGCATTGAAAAATGATTGCTCCGGGTC  
ACCAAGCCAAGTGCCTTCCAGAATTAAGCACATGAACTGGCCTACAATATATGTAATGCCA  
GCCAACTAACCCTGCTGTCTCATCAGTAACTTGCCAGCTTTCTATTAACCATTTCCGCCGAT  
GATTATGATTCCCTCCGGCAGTAATACCCACCATGACGTGCCGATAATGGCACAGAAGAAA  
ATCTGCCATATGAGCCCGGCAGCGGCGCACGGCAATAACTCACTGGTCAGTCCCAAATAAC  
CATAGTACTATGGCTGCCCCCAAATATACTAGCGAATACCAGAAAAAAGCAGGAGGGAAA  
TCCATGTTTTCCAGGAAATCACTAATCGCTTGCCCGCCAGGTAGATTTTCAGGGTGCAAATC  
CCCATACCATCCGTCCGGCATTCTCCAATGTCATCATCTGTAATTTCCACGGCTTCATC  
GTCTTACCTGTGATAAACGCAGACTGATTACAGGCTGTATAGCTGATAACTGATACGGATA  
CATCCGCATCGGTGGTTGTAGTCCGGAAGGAAGGAGTAGCATCATTGCTGTTCCCGGACAGG  
TCCGTGAAAGTAGCGGCGTATTGCCATTCCCACGAGCCTTTTAATACCCCGCCACTGTTATT  
TTGGCATAGTACAGGTAAGGCATCGAGCCGTTAGCCCAATAACCAAGTTGTTAGCGTTATC  
AGTAATAGAGACTGCAAATGCGGCTGAGCCCTCTAAGAGACCATCTATATAGATATTCATCG  
TGCCTGCAGATAAAGATATCTTATATAACATGTTCTGAACTGGATATATCCGCCGCCGTAACG  
ATTGTATTATTTGCATTTCCCTGTTATTGATATATTTATGTCTGTTGTAGCAGTGCCACTCCAAC  
TAGACCTGAATTATTTGTAGTGCAGTATCTGCCGTTAGCATAACGGATTAGTAGGGTTATAC  
CAGTGAGTTAATTTATTACTGGAGTCCCCGTTTGGGAGTGACAAGACTATTGCATAACGTGT  
TCCGGCAGTTAGATTAATTATATTGGAAAAATCAAATGTATGATTTACAGCAGAAGTTGAGA  
TAGTTGAAGCTACCACCGAACCGCTAACCAAGGCCTTCCCTGTTGGCACATCGCCGCTAGTT  
GCATAGATGGCATAATTAATAATTTCCAGTTGGATTGCCTACTCGTTGTGTTCTAAAGGTA  
TTGTTGACAGCCACATCATTAGAAAATTGAAAGGTCTGTGCTATCCAGTTAGCACCGTACA  
TAGATGTAGCTGAATATGCAGTACCATTATATGGAGTTTCTGTATAACTTGATGAATTACCTG  
CCGATACATCTGTTCCAGACGTATAAATCCAGAATGCTCCAAATTTAGATAGGTTATAGCCA  
TCATTAATCTACCACTTAGCTCAATCTCAAATCATTTCCCTAGCTCCAAAGACGCAGAATC  
ACAACGCTCATAACCGGCTGTGTCAGGGAAATAGGCCAGTTTACCGCCCATAGCAGTTTCAC  
CACCGGTATATAGGTTATAGTTAATAGCCGAATTTTGCCTATCTGGTCAATCCACATAATCC  
ACGGATCAGATCCTTGCCCGGGCATAAAAGGTATGTCATTACCGATGGAATCACGCATGGCG  
AGGTTATTAACCTCAGAATCTATATAATACCCATCCAGCAGACTATCCGTTGCCAGGTAAA  
GGGCGCGGCAACATGTGTAGCTGTGTAAGTGGCATTGGTAGCCCGGATATTCGCCTGGTATA  
TAGCATCTGTTATAGTTGAGGCTAAAATCGTGCCCGGCCAATAATGGTAGCCAGAATCAAC  
ATACCCACGGATATTATTAATTTCTTCATGCGTGCCTACCCATCAAACATAACTGGCATA  
GCTGCATATATGGTAACTATCATTGCTAGCAGGACACCGTTAAACAATCCCATATCGGTCCC  
ACCGGCAATATATAAGAAGTGGCAATCATTGCTCCGTGGTTATTCGCATATTTCACTCTGCC  
CCATATAAATAATCCTATTACCATCACGATACAAATTAGGCTGGTAATCATTGTCAGCTGG  
TTACATTATTGAAAATGGATGCCAAGCCTTCCAATATATCCCCGATTATTGTTCCATCCCATT  
GATGAGCCCACTCATCCAGCTTTGTCATCACCCACACTCTTCTGGTCATATCCAAACCCTGAG  
TTTGAGTCGAAAAGATCTTGGGGCACATGGTTTGGAGACCCGGAATTGTGCCCTTGCCATAA  
GCAGAACCGTATTCATTAACACCGTGCCCTGGTCAGTCTCCGTCAACAGCTTTTGCACCCA  
GTTAATCTCCAACGCCCGCAAACCTTCGATTATCCAACCTCCCATTAAGGTCTGATTTTCCTT  
TTTTGTTTCCAGTTGGCTGTAGTCAGATGTGGTCAGAGTGTAATTGACCTCTGGCGGAATCTC  
CCAATATTGGGGGTTACCAACCATCTTGAGTATCAGAGCAGTTTCCCACTCCGGAGCATCAT  
CAGCTGCAAAGTAAAAGGCGGAATACCCCATATCATAACCGGCGTTGTAGTAAGCGTATGG  
CTCAATTGCTCCAGCTGAATAATTCCATCTGTATCCATCAGTCTGAAATGAAAGAGTTTATT

AGCCGGAGTGGTGGGCTGGCCGGATGAATAGGCGATGGTGTATTTAAAGGAGACCAAGCTA  
TCCCCTGTCTCTACAATATTGTGCGCAACCTGCACATCATCAATAGTAAACGTGGTGGGCGC  
AGCCGGGTCAACAGCCAGTACCGCTGCCGGCGGTAAGGATGCCAGACATAAGCAGGCAACT  
ATGACGCCTTTATAGATTTTCGTAAATAATCTGCCATTCATTCACACTCATATATATTGCCG  
GTTCTCTGGGGAGGTCTTCTCCCTTCAGATAGCGATAGACCTGCATCCTGCTGATGCCGTATA  
TTCGTGAGATAGCCGTAGCTCCAATACCATGCGTCTGCATGATATATCGCAGGTTATCAGGG  
AAGGCATCCTCATTCTTAAGGGCCTCAAGCAGCCCGGTATCTTGCCCGAACTATTATCTT  
CTGTTCTTCCATACTTTTAGTCTACCTGACTGCCTGTTTAATAACAAGGTCCTTAAATCTCCCTA  
ATTATTTATTAAGATATACCTCAACTGTCACTTAAAGGTGACAGTTCAAGGAAAAATCTTG  
TCTATCATCATAGAAAACGAGAGGAGGTGATAAAAAATTGGGCAAGGCAATGTCAACCGTC  
ATGTTAATTGTAGGTATCGCAGTTTCGGTTTTATTTTTCCCGATGGTTCTCTCCTCAATGGATA  
GTATTCAATTCGCATCCAATACCGGTACCTATGCCGCCGTAACGACCGGTGTCGGCGAACT  
ACCGCGGACGTTGTTCTTTCCACCGCCTTATAACAACGATGATAACGGTCATGTTACCAGCAT  
CACGTCTACGGTTGGGACAGACGTTCCCTGTGGCCGGCACGTATGTTGCTGCTACTAAAACCC  
TGACTGTAACCGGTTTAAACGGCTTCCGAATCACGGACACTGACCGTCATCTATGACTCCGAC  
AATCTGTCGGACTACACCGGTCTGGGCACTATTGTCAGCCTAAGCCCGCTCATTATCTGGCT  
GGTAATTCTGGGTGCCTTGGGTATCGGACTTTATTCCAACGTAAGAGCTAATCCGCAAATT  
CATTCATAGAAAGGAGGTGACAAAAGAAAATGTTTAACTCAAACACGATGAAGGTCGTAGG  
AGGCATTCTCGGTATAGCTATTTCTCTGCTGTTCTTCCCATCGCCCTGAGCGGTATTGATGC  
CGTACTGAACAACGCCAATTTGGCCGACTATACCGGGTTGGAACCATCGTAAAGATAACCC  
CCATGATCGTGTGGGTGGGTATCTTCCCTCGGTTCCGGCTTAAACCCTGTTTTTTGGGGTCAAAG  
GAAGCCGCGGGGGCAA AAAAATCTAGGTCACGGATGGCCTAAAGGAGATCGTAGCCATGAAG  
ATACTCTGGATGCAATTTGGAAGAGACAAAACCCGGACACAGGACGTACACGTCCTGACCG  
AGGATGGTCGTATTGTGCAAGTTTCTCCGGATGTGCTTTATGGCTGCGTATCTGTGCGACGAAT  
GGGGTCAAGCATGGGTGCTAAGGGGTGCAGACCTGTGTCCCTCCCGTGATGGCAAGGGAGA  
CATACTGCTTGTTAATGAGCGGAGCTTAGCACCCATTGCGTTTGACGGACGCCCTGCACGCA  
CGCACGAAGAGGCGCTGAAACTCAAGGATGATATCGGAGCAGAAGCCTGTGAAAAGTGTGCA  
TTTTAATCGTGACCGCGAAATAAAGAAAGAAACCATGGCCAATGTACTCCAGGTACTTATTA  
TCGGTCTGTTCCGGCACGGTCTGTGTAATTGCTCTCATAGGGGTATATGCCTCAGGGAATGCA  
AAATTGCCATGGGTGGGTAGAAAGAAATGACAAAAGCATCAACAATTGAAAAGAACCAGGA  
GTTAATTGCCGATTCAAAACTCCTGAAGAAATAATTTTCGTGCGGTATGCAATCAGACCAA  
AGGCTAAAAGGGAACCCAATGCCCTGGTTTATGATATGCGCCTAGGTTGGGCTCCGGAATAT  
ATAGATAATCCTATCGGCCATCGTAAATCATTCCGAAACAAGCGATTATGCCCGATTATCAG  
GCGCTGGAAACAGTTACCTACTGGCGAATGGGAAAGCAA AATTGAACCGGTCCCTGAACCT  
GAAGATATGGAAGCATCCCCTCAAAGTCTTTACAGAATGCTGCATTGGGAACCTTTAGTTAA  
GTCTGCATTTGGAGGGTTGGGAGATATCTGGCAGAAGCTTAAGGTCGGACTGCTGGTTGTAT  
TGGTAGGTATAGGGATTTTTGCCCTGTACCTGTTACCCAATCATAAGGAGTAGCTATCATG  
GCGGGATTTAAACGTAAAAATGGCGGGCCTGCAACCGGAGGCACTACGGATACTTTAGGTA  
TCCAAGATACAATCGGTGCGGCCGGTGGCAACGGGTTTAAAGTCAGGATTACTTGATTTTGAT  
GCCCTGGAAAACTACTGGGAAATCCTCAGACCGTAAGTCTGGCAAAGAATTTACTTCACC  
CGGTGACAATGTCCGCGGTCTGCTGATGAGGGCCGACTTCAAGGATGCCAAACAGGTACTC  
GCGATGATTGAGTACCTCCATCGCTGTAAGAAATTATTACAAGCGCGGTGAAGACAGATT  
ACTGGATTTTATTGCCGCTCTGCCAGCAATTCAGGCCCGCCGGATAAACCTCTTGCCCAAAG  
TTCTTACCCATGGCGTAATGGAAGCTTCCAGCAGGCAGCAGAAAGAACGGAGACCCGAATG  
ATCTGGGGATATATAGGTATGAAGGTGCCGGCAAATCAGCTGCCATGTGCTATTTTGATCT  
GCTGCATATTGCCAAAGGGGGCGGGCTGTTACCTTCCCAGGCTTCGAAGTGTAAACCCCA  
ATATCACTCTCGATGATGGTAATCATCCCCGTCTGGGCAAATCTATAGATATGAAGGAATTT

ATTTTCTCCTTCAGTGATGAGCAAAAGCTTCGCAACGTGTTTGTCTCTATGGATGAGATCCAG  
AACTTTTTTCGGGTCTGATAAATACATGACTATGTATAATAGTCTCATTACCAAATACAGCAT  
GCAGCGCAGAAAGCTTAACTTCGGCATCAATTACACCGTCCAGAGTTGGAAGTGGATTGATC  
CACGATTACGTCAATTAACCCACTTCCTGACTGTCTGTAAGGATTTGTCACGAACACCTTGG  
GGCAAAGAAGCCGGTTTGAAGCGCGGCAACTGATAGACCTGGTGACCTATGATTGCAAAG  
GGTTTATTACCGGCGAGGAATGGACTCCTTTGAAACACTTAACTTAAATATTTTGGCCGGTTC  
GCGATTGGTATGACAGTTATTCGACAGTGGATCCGCTGGAAAGTTTTAGAAAAGTGGTTATT  
AAAAAGCCTGAAGATATTTTGGATATGAGAGAGGGAATGCCACGATTTAATCCGCTGGATG  
ATCCCCCTCTTGAGAATGTACCGGATGACGTCCGTGAAATAAGCCAGGAAAACAATGCCCG  
GATATTATCCAAACTTGAAGAGCAGGTGACCCGGCTACTCTTATTCAGGTGAGCAAAGCGC  
TTAGAAAGGTTAATGCAAATGACAACGGACGAAGGGTTATTAGCGGCTGCTCAAGCGATT  
GCAAACGCGTTAGAATCTCTGGGCAATACCCTATCAGCTGCCCTTGACACATCAGTTACCAC  
GCTGATGAGTACGGCTTTATCAACCGGATTGGAATTATTCTTACTCTCGATGATTACTGTATT  
GGCGCTATGGAAACGCCATATTGTACTGGATATTCTGGCAGGGCTCGGGTGGTTTGGTATCA  
GTTTTACCCTCTTCAGCAGCGCTTCACTAATAGCGGTAATGCCATTCGCAACCTGTTTGGCTC  
TTGGGATATTTATGTTTTATCGGATTATTGAAGACACCGGCCGGATAGGCCGATAACGAAGG  
AGGATGACATGCGTACAAGTAAAAATATGCATCAAAAGAAGCCGATAGTATCCCGGCAGTT  
AAGGTAAGCTGGCACGAAAGAATGCCTAAATTTAAAGAGTTTATTCCGAAAGACATCCGAA  
GGCGTATCGGGATGCGATAGGAGGCCGAATTATGGGTATATTAGGATTTCTTCTCAGGGTA  
GCTCCGGTAAAATCCTCTCGTATGGGCCACCTAGACAACCAAATAACCAGGTGGCCATTAAT  
GCTGCCCTGCAATCCGTTGATAGCTCAGATTCCAAGAAAATTACCACAGTTGAGATGAAGGA  
TGGCAAATGGACRATTACCACTGACGGWGTGKTATAACATCGATACAAACGGCCAAACA  
GCAGATACCGTGCAGTATATAACCAATTATCTGACTAGCCGCGGGGCATCTGCGGATATTAT  
CAAATCAGTTACAGAGCAGATTCCCATTATCACGACACGGGAATCTGGAAACGTCGTTAAG  
AAAAAAACCAGTGCAACTATCACAGATCCTAATGATACCACCAAGAAATACACTGCTGAAC  
CTGTAAATGAACCAGCAAATGATTCTACCGGTGAAGGTGATACTCAAATAACACCGATGTT  
TCGGTCACAGTGGATAATTCTACGGCATGGACGTTTACTACCCCTAACGGCACAGTCTACAC  
CGTGCCCATGGCGGGCTTAGCCTGGTCTGACCCTGCCAAAATGCATGAATATATAACAAACT  
ACCTGAACAGTATCGGCGCGCCCGCAAATGTCATCATGGAAGCTGTTAGCCGTATGCCGGAT  
GTAATGGGGGATACTGGTTTAAAGAGAACCCCGGACTGATGAGTTTGGTAACCTGATAGACA  
ATACTCAAGAGATTAAGGATATTATCGCAGGCAGTGACCAGTCTCTAGCTTCTATAACTGCC  
TTAAAGGCATTCTTAGATGCCAAAGGCTTTTCCAACCTGTCTCCTGAAGAGCAATTCAATAA  
GGCGATTGAGTACGTTTTGATACCGACTGATTCTGTCTATGTACCGCCTGATGCCGGTTATA  
ACGTAGGTCAAACGCACCGCCCGGAATGCCTGATGATGTAGCCGTATCTTTGGGGCTACTG  
CCATCTAAAGAACAGATTGCATATAACGCCCCCAATTTTACTGGGCGTACCTTAGAAAGGC  
AGATGCAGATCAGTACTTTGCCGAGCTAAAGGAAATCGTTGGCTATGACATTACCTCGGCTA  
ACCTCAAACAGGCTATGCGTGAGGCTCAGAAAATAACTACCAGGCAAATCTACAGGCCAG  
CTCTGTAGCTATTGCCTTGAAACCTTTTATGCGTGGAGAAGGAGATAATCAGACTATTGATA  
TCTTCGCCGCCTATAAAGCAGGTATCCCGGATAGTGTTATGGAAAAGGCCGTTGGCATATCA  
AAGGCTGATTCTATCGACATTAAGTACATGCTGAAATACGTTGATGATTCAGGCAATGTGGA  
TATCCAGCAGGCTGTATCTGACGGCTGGGGGAAAGGTATCTTGCAGAAGTGGTTCGGGCTGT  
CTGATGCTGACTTTAAAAACGCTGAGTTTGCCTCTGATTACGAAGATGCAAACCTTCTTAGAG  
AAAATCGGCATGGCATACAAAAAGACCCAGGTGAATTCTTAAAAAACGTGGGTATTTCTA  
TGATACCTTTCTATGGTACATGGAAATTCAAAGATGATAACCCTGGTTGGTTAAATGCTACA  
AGTTTAGTTTTAGACTTAGCAATCTTTATACCTTTTGTGCGGAGGTGTTTCCGCTTTAGCCAAA  
ACTGGTATTGGTGCAGGTAAAGCTATTGCCAAGGAAACACTTATGACTACCCGTGGTTTAGT  
TATGGCACCTATTACAACCTGCTCTACATCCTATAGCTACCACTAAAGCCTTATTCTCACCTCT

GGGGGTATTACTCAGTAAAGTTAAGGTGCCCTCAGCCATATTCTGGCGCGGAAATAGGAGTG  
AGGTGTTTGATATTGCTAAAATAATGGCTAATCCTGCCTCAGTCGAAACAACAAAAGCCATG  
GATAGAGCTTTGGTACTCAGAAATGAAGGTAAGCATCTGGTTCGGTTCGATTGTAGTTGA  
CGGCACTGAAATAGGTACTATCAAATGGTCTGATGCTGGATTCCAAACGGTATTCCTAAAT  
CCATGGGGCATTCTACCCCGTTTGGAGAGCCGTTTAAAGCTGGCATGACAGTTGATAAAGAA  
GGGCTATATCTCTCCCCAATATGAATCTTGGTTTGACTAATGCTAGTGCATATGGTCGGGTA  
CCCGGTTATGTCTTTAATAATAAACTCTGGTTGGCTCTATTGGTGATGGGGGGAACTGCTT  
GGGCAAATGGTAATGTCATAGGTAGAGTTGCTGACAATTCACCCATCTTAAGGAATGGCA  
GTGATAAGAAGTTAGGAACACTGCTTTTTAAAGATGATAAGCCTTTCATCAATATCAATGGC  
CGAGATATAGAAATCAAATATACGATAGCGGCGTTGTTACTTATGCGAATGAAAAACAGA  
TCATTGGTTATTTACCACAGGGAATAAGTATACGGAGAGGGCAAAGTTATAGTCGGGCA  
AATCAAAGAAACACCTACTTTCGCAATCATCCATAATAACGGGCTTTCGCGCCTGCCAAATG  
CAATTCAGATGTTAAGAATATGCAAGAAATGGAACTAAAGCATGGCAATACCTGAAAAC  
CGACAAGGCAGTAGGCAAACCTTATCCTGTATTTAAACAATATCTGGACTGGATAGAAGAT  
GAAGCGGTAATGGCTAAAGGAAGCCGCATAATTCCTGATTAGACGATAAGGGCAAACCTG  
TTGTTTTGCGAACTGCTGGGCCAGATGGGCGGACTATCAGCGTCCCTTACTCCAAGTAGTC  
ACACCAGATTGGTTTAAAAAAGTTTLAGAGATTACCAGAGCGCTTGCCGGCAAAGCGGACA  
CTCTTAAACCCCGCCGCTCTCCAGGTGATAACAAGGTAGAATCACTCCCCAGAGGAATG  
GATGAGGACTTCATATCTTATATGCGCAAGAATCCTGATAATGTACTCTATGGCAGTACTGC  
TGAATATACATTCACCGGGGGCAGAAAGCCCGGAGACTTAGATATTCAGTCTCCTACCCCGG  
AAAAGACAGCCAGTGATATTGCTGATATAGCCCGCCGCTATACTGCAAATGAGGTAAGGT  
AACTAAAGTGGCCACCCACTATACAGTATCTCAGCTTAAAAATGGGTTGTGGAAAAATATCG  
CTGACATATCTGAATTAGGATGGAAGAACTCGATGCCGGGTTTAAAAGGCTGAATGCACCT  
ATCAATACAGTAAAGGTAGAAGGCATTACGATGGAAGCGCCTAGTACTCAGCTTTATAGCCT  
ACTAAACCGAACTGTATCCAACCTTTGAAAAACAGGACCGTTTACGGCTATGGTAAGCAAAC  
TGGGAGGCGAACTTGATTTGGGCATTGGAGCCAAAGCCCCCTCTCTGGCAGATTTGTATAAA  
CTAAAGGCCAAGGGCGTCTACAATACTGTCCGGGATATCTTTGTGCCAAATCTGAAAAAGAA  
AATCAATTATGAAGCCTTGGCTAAGTCTAACCCGGAGCTGGCCGGTAAGATTGAAAAGGTCT  
TTGCCTCCGAAGCGGATACTCAAAAAGCTTTACTGACTACGATACGGGAGAAATCCCCAAA  
ATTGGCTGATAAACTGGAAGATTTGCTTGCTGAACGGAATATGTCAAATGCAGCCCGCTTGG  
AAGCTGCCCGGCAAATAGCACCGGATTTAATACCTGAAATAAAGGAGTTGCTGCGTGCTGA  
ACAACGGTCTATGTCTGCCGCCCGTATGGCCGCCATGACGGCCGGAAGGGATGGACGCGCC  
AGTGCCATAGTAATAGCCGGCAGACTGGCAAAGTGGCGGCAATGGAGAAAGCCCGCCTTG  
AAGAGGAGATAAACCAGCGTCCAAGCTGATAGAAAAAGAACTACGTAAATTACCGGCACG  
TATGCCGGGTGTTGGTAATATGAGCAAACCAGAATTACCGCTACAACACTGGAACGGAAA  
CTGCGCACCGGTGGGGGCGATTATGCCAGCCTGCGCAGCCGGATACCGCCATCCAGAGGGG  
AAAGAGTCCCACCGCCGAGAGTTCCCTACCCTTAATCCGCCGGATAATCCGCCTCCTAGGGTC  
GATCCTCCGCGCATTACCCCGCCAGATTTTAACTACAAACGAGAGAAGGGCAGAAATGACA  
GCGAGGAAACCTCACTTAATGCCCGTCCAAAACCTTAAAAATGGGGATGTAGCCTGGAAACA  
AGGCGAACTGGGTGCTGGTGATGATAAACGCCCTGTTTGGATAATAAAACGTGCCAATGGC  
ACTCATGAATATGTTTTCCAGCCACCGGAAGGGGCAACCCGATTGGAAGGCACACCTAAGG  
AAACATTCTTTACGCGGGGTAAAAAACCAGCCTACCAATCTGACCCAGCAAATGGGAGTTACT  
ACAGCTAAGATAAATTTGAAGGATAATCCGGAGATAAGGTTTGTCCAGACTAAAGCGCCTA  
AATTTAAACCATACATCCCAAAGAGTGTCCGGCGGTCTATAGGCATGTGACAAAGTGTGACA  
AATATTCCAGATATGCGAAAGGCCGAGTGTTTTACTCGGCCTCTTAGGTTCTATTATTCTTA  
CCTCTTAGCATTTTAAAACCTTCCCTGACTCTTTAGGCACGACTGAAAATAGCATGCTTATATC  
TGATTGGGCAATTAATAACCTTCTCTAAAGACATTGGCACATGTTTCCATTTCTTTCATTGT

CATTTCTGGCATTCTCCGTCTCTGATACAAATATATAAGCCCTCTATATATTCCTTGGTTGC  
ATTAGCTTCTAGCCATGCCCTAGGGTTTTTAGCAAACCCCTTCTCTAATATCTCTCCTACACC  
AATCGTCCAAAGCATAGACTCTAGCAGGTCTTTTTCTTACTTTATCTTCTGGCTGGTAATAAAC  
AGTAAATCCTCTTCTATGTCCAGTGCCATATTCTTTACTCCTATTTACAGTATTTAATATCTT  
TTATCAGACTTTACACGTTTTAATGCGGTTTGTCAATAACATAGTATTGTAAAATAATGAAA  
ATAATTGTAATAATCCTACTATGAAATCTTTAAAAGAGCATCGGTTAGAAAAGCTCATAACTC  
AAACAGAATTAGCAAATTAGCTAAAATTAGTAGAGTGTGAGGAGCCAAATTGAAAAAGG  
CCAGCAGAAACCATCCGAGTTAACTATCCGTAAGCTAGCTAAAGCTCTTGATGTAACCAG  
CGGATATTGAATTTAATGAAATTTGAATGGGATACTCGAACCAGAACATGGGTCGGATATT  
TATTTATTTTTGGTGGTTTTTTTTGCTTTAGTAATTAATCTATTTCGAAACTCCATGGTTTTATAT  
TCCGTTCTTTGGAATTGGTATTGCTCTTATCGCATAACAATCTTATTCGCTATGGCCAGCTCCG  
GGACTATTACTGGCTATGGTGCATGGAAACAGACGAATTCTTTGGCCATTCAATAACGATA  
TTGAAATGAAGCTATTCCAGCCCCCGCATTATCTGCCTGGTGGCTGGCAAATCTTTTGGATAC  
CGGCTAAGGACCCTCTCAAAGCTACCATAATCATCCGCAAGTGGGTCAGAGACGCTGAGAA  
AGTTTTGCGTAAAGACCCAGAATATAAAGACAGAATGCCTAGGTAGGAGGAATATTCTTAT  
AACAAAATGATATAATTTACGTACATGTAGTTCAATTAAGAGTGTCTTTAGGGAGAGATAGT  
TACAATGAATGAAAGTAATCAATTAGAACCGATACCAGAAGGCGAAATCCAAATATCTCTA  
TTTAAAAACAAAGAGATCCGAAGAGTATTGCATGACGGCGAATGGTTTTTCTCCGTGGTGGGA  
TATAATAGAAGCTATAACAGATTCTATCAGGCCACGACAATATTGGACTGACCTTAAATCTA  
AGATAATCAAAGAAGGCGCAAATGAACTGTACGAAAATATCGTACAGTTAAAAATGCCTGC  
TTCAGATGGTAAAGAGCGAGATACGGACGCAGCAGATGCAGAAACAGTCTTCCGAATTATA  
CAATCTATCCCTTACCAAAGCAGAGCCCTTTAAGAGATGGCTAGCTAAAACAGCGTATGA  
TCGTATTGAAGAATTCCAAAATCCTGAGATAGCCATCAAACGAGCTATACTTGATTACCAA  
TACAAGGCAGAACAGATGAATGGATAAAGGCGCGCATTGCAACTCTGACTAGCCGTA  
ATTAAGTACGAATGGCAAACGAGGCATAGCAGGTGCGGAGTACGGCATTCTCACTAAT  
GTAATATCAAAGAGACTTTTTGATATAGATACAACAGAACACAAGGAAATCAAGGGGCTTG  
CAAAAAGACATAACCTCAGAGATCATATGACTGATATGGAACCTTATCTTAAACGATGCTTGGG  
GAAACATCAACAGCCGAACTTGCGAGATCGAGGGATGCTAAGGGTTTTCAAGAAAATGAGC  
AGGCAGCTCATGCAGGTGGGAGAATTGCAGGAGACACAAGAAGGAATTTGAAAAGCAATT  
AGGGGAATCGGTGCTCTCTAAAACAATTTCTTGCCCAAACATCCCGATCAGCCAAAATTAG  
AGGAAGGATAATTATACATACCCAAGGCAAATATTTTTATAGCTTCAGGTTATCAACCGGA  
CTAAACTTCTTATGCCCTTGAACAGCTACCTCAGAATTCAAACTGGCAGCGTATTTTTCTAGTT  
TGCCTCAGAGTGTATGCCCCATAAGAGATTGAACTTCAAACCTCCCTGCCCATTCGGTAA  
GCACATAGTAGCAAGGTGTGCCTGAATGTATGAGGGCTGCACCGGATATTTGTAATCCCTG  
CCCCTTTCCTAATACGACGATTGTCTGCATGATGCCATTTTTAGTTAAAGGGTGGCACTCTT  
TATCACTATAGCGAGTCTTGTGACGGCTAACCCAAACATCAGGGGTTTTATCTCCGGGGAAT  
GACTGGATTTTAAGATACTGATATTCCAGTAATGCCCTCTGAACTTTAGGGCCTATGCGTAC  
AATCCTCTCCTTAGCTCCTTTGCCATAACCTTAAACCAATTCATATCATAATTGATATCACT  
CCACTTCAGCTCTGTGCATTCCCTCAGTCTGAGGCCTGTATCCAGCAACAACAGAATAAGTG  
CTTTATTCCTTTTATCTTCGAATGTTTCGCCGGACACTAAAGCCAGCAACCGCTGACAATGCT  
CTTGAGTGAACGGCTGAATAACTTTGCGGGGTACTTTAGGCAGACGTACCTGTTTTAACGGA  
TCTACTGTAATTTGCCATTGTCCTTGAGCCAGTTAATAAATGGGCGAATTTGCTTGAAGTAA  
TCAGTAACGGATTGTGGGCCGTTGGTCAGCTGTAACCTGTTGTAGAAATAAACCGAGGTGTAT  
TGAGGTAATCTGCGCCGGCTTAGTAACGCCATGTTCTGGCAAAAATCAACAACTTGCCGC  
ACATATATCTGTAATTTGAAATTTGTTGCGGGGCTCAGCTGCCCTACTTTGGCCATAAGAAGA  
TAGGTGGAAAGACACAATCTGAGGTCATCAGGTGTAGTCAAAGGTCCTAGCTACGATTG  
GGTAATCGTAAGAATTTTTGTGAGTTAAACGGTCATTCATGCGCCATTTTCGAGCTACCGACA

GCGCTTTTAGCTTTATGGTGGAGCCGGAGGGATTCTGAACCCTCTACCTTTTGACTGCCAGTCA  
AACGTTCTCCCAAGTGAACACTACGGCCCCAGCAACAGATAGATAATCTATCATAAAT

>Dmc\_IME1-4

ACAACATGGTGGGCCATCTTGGTCTCGAACCAAGGACCTCAGTCTTATCAGTTCAGCCTTT  
AAAACCAGTAAATCCTCTTTTAGCCGCCTCCTTTAGTGTTTCAATCTTTTGGTACTTCAATTA  
TGACAGCAATAGCCTGGCATTCTTTAACAGAGTGAGTGCCTTGCCCATTTTTTCAGGATACATT  
CGCCGTTTTGCTCTATAATTTTTGCCACTCGGAGTTCGTCGTCGATAAAGACACAGTACAATGT  
CCCCACCTCAGGAACCATATCCCTGTCTACAACAACAATATCACCATTCTCAATCTTGGGCT  
CCATACACTTACCCTTAACGATATATGATTCTATATTATGCCGTGGTGCCTCACGTACACGTG  
TCCGGTAAATGTATTCAACTGGAGCAAACCCACTATCCCCTGCGTGCGCCCTAAATTCAGTA  
TAAACAGGTATGCTCATGGGAGTAGCCAGCCGTAACCGTTCTAGTATCTCTTCAGGACTCTC  
TGGGCGTGATAATGGTATTGTGGAAGTTGGATTGTGAATACCCATAGATCTATATAAGTCAT  
CCACATTTATGTTAAATGCCGACGCAAGTTTTACTAACTTATCCACCCCTGGAGTAATTCTCC  
TACTAGATTCTAAGGCTTGTATAAGTGACCTTGAAAGACCTGCTTTATTTGCAAGCTGCTGTT  
GAGACCAATTCTTCGCATCTCTTAGACTACGTATTTTATCCGATAGTTGATTGATTTCAATTCA  
TGTTCAATTTGCCACTATTTTAGCAGGATTTAAGCAAAAATAAGAGCCTCAGCGAGATATTTT  
ATAATAAAGTGGCTCTCTTTATTATCCATTGGCTACTATATTATCTATTTGCAGTTGTGTTTT  
TGTAGCCCTCGGCTACTATTTTATCCATGAACACATTACTCGAGCAATTGATTACTGAACAA  
ACTACTCGTCAAATGAGCGATTATCAATTTGTTAAATTTTTAAATTTCCATAGCAACGCTCAT  
GTATCTCGACAACCTTTGGCATCAAACGCGGAATAAGCACATACCTTTAGGTTTTAAAATCCT  
AAAAGCGACAGTGCAAACATTTCCGGAGCTTGAGACTGCCGCCATCGATTATCTCAAGAAA  
AATACTAATCATGAGTAAATCTGATTGTGGTAACGCTACCTTGTGAAATACGGTCTTGAGT  
ATTATCAAGCAATTGGCCGATTGGGCGGCAGACCAAAAATTAAGCTATCCGATGAAATACA  
AACGCGTACAGCCTCCTTATCTGTATTGGTGAAAGGAGAACGGCACGGGGAAGGCCAATCT  
CTTATGGCACTTAAGAGGCTGTACGCAGAAAGGGGAATGAGGCAATGCCTCAACAACAAGT  
GACTTATCGTATCAAGAATGAACGCACCGGTCAATGGTGGGAGGGAAAAGCTGATAGCCCG  
ATAGATGCCATGCGGAAAGCCTCCCTCGAATACCCGGTAAAAGCCCTAGTACCGGCTGGA  
CAGCTGAAAACCTGCTGGGTACGTCAATGGTGTTCTGCTGGTTATGGCTCATGGGTAACCCAG  
ACTATGTCCGCAAAAACAACAGAGATGGTGAAAGCATGAAATCTTTCCACGTGCTTACCGC  
GTAGCTAAAAAAGAACAGGAGAAATAATATGCCTTATAAAAAGATATTTCCCGGCCAAGATA  
GTAAGTTTTGACCCTTATTTTGGAAATGGAACGTGATGGTCTTAAGTCATTTATTACCGTCACA  
GCATTTTCTATGGATGCACCGGGCAATCTATTGTTGGATGAATTTTCAGAAGTCAGAAGTCCC  
TATGCTGATAACAGTCCATAATCCCCAAACCGGTCAATCATTTAATGCCTATGTAACCAAAG  
TTGTGCAAAATTCTCCCGCCTGTTACTGGAATACCATCCATATCGACATAGAACGCATACTC  
AGAGCAGAAGAAACGCCAACAGCTATGGCAAGCTACCCCAAAAAGGATGACCTTAATGACT  
AGTGGAATGGTTATCTTGGCTGAGATACGTACCGAGACTGAACAAGGCCGTCCCGCCCCTAC  
CACGGGCTGGGAATGGAGTCCGGGCTGTACCCCGCTCAGAGACCCTTCCCCTGGCAAATGG  
ATTGTTTCGGCGCACAGCAGACAGCTTTGATGTGATGTTCCGCTCATATTTGACTCCTGAACTA  
CGCAGCGGTGGCCCTGAATACTGGATAGGCAGTTTTAATCCTACTGATGCAGGCGAATTAGG  
TGCCCGTGAAATGGCGCTTAAACTGCGCAAAGAATCTTACAGACAGGAGGCCGAACGTAAT  
GGTCACAGCGATATCGAATAAACCTATTGAATTGTCACAGCGGCGTTATCGCCGAGGGAATT  
ACATGTACTGCCAGTCCGGGCTGATCATAACTATAAATGTCCGGTATGCGGCTGCCTGGTA  
CAGCCCGGAGAAGTGGGGTTTATGCGCTACCGGATTATACGTGACCTGGTAACTGAGCCAAT  
TGGTGACGTACTGCATGCGTGCTGTGTGGAGGCAGGGAAATGATGGAAATTAATAATTGGTT  
ACCTACTGCTCTCTGCGGATCTACATCAACCCGGAGATGTAGATATTACCTTGACGACTGGA  
GATGGCACACTTATTGCTGTCGTTAGCTCAAAGACACTTATTACCGCTATTGAGGTACTGGA



GAAGACAGCGGAATAGCATATCCGGATCAGGACAGGGGAGCGTGATCTCCCTCCCACCCCT  
CTGTCCTGAATTAATAGTAATCGAGGTCCATTATGACAATAGCAACACGTAAATATACGATA  
GACGATATACTGGCCAAACTCCAGGGCGTCAAAAAGAATGGTTCAGGGTTTATGGCCTGCTG  
TCCTGCCCATGAGGATAAAAACCCTTCTCTCTCCATCAGCGAAAAGGACGGCAAGGTGCTCC  
TGAAATGCTTTGCCGGGTGCAGTTATGAACAAATCATGACCGCGTTAAATATGCCAATAAAT  
GCCGCAGCACAGGATACTACAGCCACCTCTTCAAAAAAACCAAAAGAGAGCACCAAACGGG  
AAATAAAGCAGACTTACGACTACACAGACAGAAGCGGACAGCTGATATTCCAGGTAGTCAG  
GTTTGAGCCCAAAGTTTCTCCCAGCGACACCCTGGCGGCAAGACCGGCTGGGTCTGGAATA  
TGAAGGATATCGAGCCGTTATCTATCATCTGCCAGACGTGCTGGAAGCGGTAAAAACAGG  
CCAGACTATTTGGATAACCGAGGGCGGAGAAGGATGCTGATAACGCCAGGGCTATGGGCTTG  
GTGGCCACTACCTCCCCGATGGGGGCCGGCAAGTGGCGCGATAATTATACTAATGACTTATT  
GGGAGCCTCGCAAGTAGTAGTTATTGCCGATAAAGACGCTCCGGGCCGTAAACATGCCTCCG  
ATATTGCCATGTCCTGCCGGCGGCAACGGATACCGGTCAAGATTATCGAGGTACCCGGCGAC  
GCCAAAGATTTTACCGAGTGGTTGGAAGCCGGCGGCCAGACATCCGAATTGGATGATCTGGT  
AGCTACAGCTAAGAGCTATACGCCATCAAAAAACCAGAGCTTATACTTTCTGTCTGATGGCA  
AGTTTTCTATCGAAGCCGGCCGATTATTTATCATTACAGGGATAATGTCCCCTACGATG  
CTCCGCTGTGCAATTTTCGTTGCTGCCGTTAAAGAGGAGATCATCAAAGACAATGGCATAAAC  
CGCAAACTTTCTTCAGGATTGGCGGTACAGACTGTACTGGCCGTCCGTTTCCAGATATAGA  
AGTCCCGTCCGAAAACCTTTTCATCCATGTCCTGGGCATTATCCAGTGGGGAATTAAGGCTA  
TGATCGAACCCAGCCCTTCAGCTGAACGGCTATTACGCGGGGCAATGCAGTACATGTCGATG  
GAGGCACCCTGCCGGATTATTTATGAAAATACCGGCTGGACTAATATCAACGGCAAGGATGT  
TTACCTTACTCCCACGGCGCAATCGGAGCCGATAATGTTGAAGTGGAAATGCCATCCAATA  
TCAGCCATTATGATATAACCTCGCCCGAACAGAATGACGATGTGAAGTCCCTCATTGAGGCC  
AGCTTTAATTTCTCAAAGTAGCCAAGTTATATATTACCTTGCCGCTGTTTGCGGCTATGTAC  
ATGACGCCTTTGTGACAGCCATTGATACCAACTTCAACCTCTGGCTGATTGCCGGTTCTGGC  
AGCCTTAAAACCACGATAGCATCACTGGCACTCTGCCACTACGGAAATTTTGATTATACCTG  
TGTGCCGGCTGCCTGGCGGGATACTCAGAATACACTGGAACGCATCCTGTTACCTGCAAGG  
ATATGCCGGTGCTGGTAGATGACTGGTCACCCGGCCAGACCACCGCCTCACAAAAGAATTT  
GACGCTAAGGCTGACTATGTATGCCGCGGACAGGCTAACAGACAAGGCCGTAAGCGCATGT  
CTGCCGATACATCTATGAGGCAGGAATATGTACCCAGAGGCTTCTGATATCCACCTCGGAA  
GGACAACCGCCAGGCGAGAGCAATAATGCCCGTTTTTCTGATCATTGAAATGTCAAAAACAG  
ATATCGAATTCCCTTGTCTTACCCTATCACAGAAAGAGGACCATCTGTACCGCCGCGCTATG  
GCTCATTACCTGGCATGGCTGCAAGCGGACTGGCCGGCGAAGAAAGTGTATCTGCGCCAGC  
GCTACCAAGAGGTTTTTTGAACAATTTACTGAGAGTCTCCGGGGTGAAAATGTGCATCTCCGG  
CTACCCAGATCCATCGCTCTGTTATATATCGGTCTGGAAATGGCTATTTCGCTGGGCCGAAGA  
AAACGGAGCAGCGGATATATTTGATAGTTTATAGATGAAAGCGGAAACGGGGAGAATGAT  
TCAGTCGGGTCTGCGTATCTCTTAAAACAAGCCCGCGAAGTATTTATTGAGATGGCCAAGCG  
ACAGGGTGCCCGGATAGATGAGGCTACACCATCGAAAAAGTTTGTAAACGCCTTAAATGCA  
GCCCTTATAGCTGGTACTGCATATCTGGATGTTAAAGATGGGGCAATCCTCGGTCTGCTTC  
ACCTGGGCAAACCTCTGATCGGTTGGGATGACCGGACTAACGGGCACGTTTCCCTCCATAATG  
ACCTGGCCTACCAAGTAGCCAACCAGCATTACCAAAAAATCAATGAGGCTTTTGTAAAAAG  
GATGCTGTATTTATGGATCTGGTGAAGCGTGGTTATGTGGATCCGGGTAAAGATGGTAAAAC  
CACTGTCTTTGAGTATATCCCGGTAATAGCAAAGGCATGCCGTGTCTACATATCAAACGTG  
AATTCTTGGGGCGGGATGAACAAAAGAGAGGTGAGTAAAACAATGAAAAAATGTGTGTCGC  
CCCCAAAATATCCCATGTATTAAAAAATGGTGAAGAAGTGCAAGAAAACGTTTTTAATC  
GTAAGCCAAAATATTCTGAACGTGAAATTTCTTGACCTTGAGGGTGCAAGAGGGTGCAA  
GAAGTGCAATACAGGTGCAATACAGGTGCAAGAGAAGTGCAAGAAAATATAAAGCTAAATT

AAAAATAGGTGCAAGAGAAGTGCAAGAAAATATTAAGCTAAATTA AAAATACATACTCGT  
AATTGTCAATATTTCTTGACACCTCAAAAACAAATATATATCACTCAGTTTTAGGGTGACACATA  
AATCGGTATGTAAGATTGTTAAATCATTCTCAAAGGATGTGACATAAATGAAAGTCGCGTTA  
TATGCCAGGGTAAGCACCCGCGATAAAAATCAGGATCCGGAAGTCCAAGTGGAGCTGC  
GGAAATATTGCCAGGAAAACGGCATGGAAATAACCAGGGAATATATAGATCATGCCTCGGC  
CAATGATTTTCGTCCGCAGGACGGCATGGAAACAGTTGTTAGTGGATGCATCTGCCCGAAAGT  
TTCGGGGGTTACTGGTGTGAAACTTGACCGGGCATTCCGCGACATTACGGTGGCCACCTCG  
TCCGTTAAAATGCTGCGCAATGCCGGCATAGATTTTATTGTTACCACTGTCCCTGTTCTTTCA  
GTCCAAGGTCCAGCTGGAGACCTGATGTTAACATCTATGCCGCTTTTGCCCAGTTTGAAAA  
GGACACCATTATTGAAAGAGTTAATGCCGGACTTCAAGGGCAAAGGCTAAGGGTAAGGCA  
TTCGGTCCGCAAGAAAGGCAATAGACTTCAATAAGGTTTTGGAAGCCCACGAGATAGCCT  
GCTCACGGGTAAACCGGATTACTAAAGAAAATCAGGGTTATTCCGAGACGGCGAGGATATT  
GAGCGAGCAGACCGGGCTAAGAATTACAGCCGGTTGGGTCTATAACCGGCTTAAGGCCGGC  
AATTA AAAATGCTTCAAAAAACCCACCCCATTTTTGCATAAATTTTAAAGCCAAAAATCTTA  
TCGGATGGGAGGCTTCAAAAAATAAATGTTTTTTGAAGATGTTGAGCTACTAACTTGATACC  
CATTATTCAAAGAAAGTCCAATTTGAAAGGAATGGCAAATAAATGAGACATCTTAAGGCGG  
TATGGCAAGGCGGTTTATTTATTGAAGGATTACGTCCGAAAAATAGATTACACGAAAGCCCC  
GGAACACATCATTTAATAGTCACAAAGGCGAGCCCCAATTTGATGACCAGAACCTTATCGG  
TAAAAGAGTAGCAATCCCAGTTTGTGGACCTATGTATTGGGAAGTTATGGAATAAGCGCAA  
AAAAACGGCAAAAATAATGCCCTGCTTAGTGGTTTATTTCAAAGGTAATTGTGCTAAACCG  
TAAGACCCCAAAATTCACAATTGTA AAAAACACTGTCCTATCTGACTAAAAATATACTAAGG  
GAAAGGAAACGAGATGAAAACCGTATTA ACTAAAATCAAGGGCATCACCCCATTTAATG  
CACAGATTCCCGATGGCGGGCGCAGACGATACATCAAACGACGTA CTGGTGTACCGGATT  
GGAAGGCAGAGGCAGA ACTAGCGTTATACAAAGATGATCATGGCCAAATCTATCAGCCAGC  
GAGCCATATTGAAGCTTCGCTTAAAGAGGCCAGTAAAACACTAAAAATACCAGGCAAACGA  
GGGGCGACCTATTCAA AACTCATTGGTTCCGCTGTCTCTGTTTCCCCTGATGCTATCACTCAT  
TTAATACAGAATTACGAAACAGATAGCCGTCTGTTGTGATACAGAAAGCACGGATAGTAC  
GCTACAGGCCAATATTTAAGGAGTGGGAATTGGAATTTGAAATCAATATTGGAGATGAACA  
AATCCCTATAGAGGTTATCAAACAGGCTCTCGATCATGCAGGGCTATATGTAGGTATAGGCG  
ATTTTCGCCCAGGACGTGGAGGAAAATTCGGCAAATTCATGGTTGTCAGATTTGAAGAGAAA  
TAATATAGTCCGTAGCCCTGCGGGTTAGTCAGGTGAGGTATGGCTCGGCTTGGTTGGGCGTG  
GTATGGTCAGGTACGGTTAGGCACGGTATGGCAGGGTAAGGTTTTAAAAAGTGAGGAGATA  
AAGGGCGTGGAAGAAGTAGATATTAGAGAAATTCTCGTTCCTCTTGCAATCGTGTGTATTTT  
TAAAATTACACGAGAGGAAATACTCAAATCTGATCTTGAATCGGGAGTTAAAAAAGAGCTT  
CTAAATCTGTTGGGAATAAACACAAACAAAGAGTAATCAAGAGAGGGCGAAATGGTTACTG  
AGACGAAAGGGATTCTGAACACGGATAATCTGTTCCAATCTTATCTGCTTTGATGGATGAG  
TGTTGTGATGAATTTGGGCCAGCAGGAGATGGCTGTTTCGCGGTGTTTATGCCGCAGATCATG  
CCAGAGATTAATAGACTCGATAAATCAGGACCGATTA ACTATGCAGAAATTTCAATTTTATA  
AACGTGAATTCGGCAAATTGAAATCCC GCCGGCAAATCATGATGGATGTGATTATCTCCTAA  
GCGAGGTATATAGACCCACACAGTACCCGCAGAAACGGGATAGAAAAACAACCACTTAGC  
CAGACTGGCAGTCCC GGCGAGGAATGAATAATCCCAGAATAGCAATCGTGGTATAGCATAA  
GTCAACAATCCATAAACCCCAACAATATTTACTACGGTCACAAATAGATTTCCGAGAAC  
ACTATCTGAGTACTGCATAACAGAGAAACCCAGCAGGGCATTGAAAAATGATTGCTCCGGG  
TCACCAAGCCAAGTGCCTTCCAGAATTAAGCACATGAACTGGCCTACAATATATGTAAATGC  
CAGCCAACTAACCCTGCTGTCTCATCAGTAACTTGCCAGCTTTCTATTAACCATTTCCGCC  
ATGATTATGATTCCCTCCGGCAGTAATACCACCATGACGTGCCGATAATGGCACAGAAGAA  
AATCTGCCATATGAGCCCGGCAGCGGCGCACGGCAATAACTCACTGGTCAGTCCCAA ACTA

ACCATAGTGACTATGGCTGCCCCCAAATATACTAGCGAATACCAGAAAAAGCAGGAGGGA  
AATCCATGTTTTCCAGGAAATCACTAATCGCTTGCCCGCCAGGTAGATTTTCAGGGTGCAAA  
TCCCATAACCATCCGTCCGGCATTCTCCAATGTCATCATCTGTAACCTATTTCCACGGCTTCA  
TCGTCTTCACCTGTGATAAACGCAGACTGATTACAGGCTGTATAGCTGATAACTGATACGGA  
TACATCCGCATCCGGTGGTTGTAGTCCGGAAGGAAGGAGTAGCATCATTGCTGTTCCCGGACA  
GGTCCGTGAAAGTAGCGGGCTATTGCCATTCCCACGAGCCTTTTAATACCCCGCCACTGTT  
ATTTTGGCATAGTACAGGTAAGGCATCGAGCCGTTAGCCCCAATAACCAAGTTGTTAGCGTT  
ATCAGTAATAGAGACTGCAAATGCGGCTGAGCCCTCTAAGAGACCATCTATATAGATATTCA  
TCGTGCCCTGCAGATAAAGATATCTTATATACATGTTCTGAACTGGATATATCCGCCGCCGTA  
ACGATTGTATTATTTGCATTTCCCTGTTATTGATATATTTATGTCTGTTGTAGCAGTGCCACTCC  
AACTAGACCCTGAATTATTTGTAGTGCAGTATCTGCCGTTAGCATAACGGATTAGTAGGGTTA  
TACCAGTGAGTTAATTTACTGGAGTCCCGTTTGGGAGTGACAAGACTATTGCATAACG  
TGTCCGGCAGTTAGATTAATTATATTGGAAAAATCAAATGTATGATTTACAGCAGAAGTTG  
AGATAGTTGAAGCTACCACCGAACCGCTAACCAAGGCACCTTCCTGTTGGCACATCGCCGCTA  
GTTGCATAGATGGCATAAATTAATTTCCAGTTGGATTGCCTACTCGTTGTGTTCTAAAGGTA  
AATTGGTTGACAGCCACATCATTAGAAAATTGAAAGGTCTGTGCTATCCAGTTAGCACCGTA  
CATAGATGTAGCTGAATATGCAGTACCATTATATGGAGTTTCTGTATAACTTGATGAATTAC  
CTGCCGATACATCTGTTCCAGACGTATAAATCCAGAATGCTCCAAATTTAGATAGGTTATAG  
CCATCATTAATCTACCACTTAGCTCAATCTCAAATCATTTCCTAGCTCCAAAGACGCAGA  
ATCAACAACGCTCATACCGGCTGTGTCAGGGAAATAGGCCAGTTTACCGCCCATAGCAGTTT  
CACCACCGGTATATAGGTTATAGTTAATAGCCGAATTTTGCCTATCTGGTCAATCCACATA  
ATCCACGGATCAGATCCTTGCCCGGGCATAAAAGGTATGTCATTACCGATGGAATCACGCAT  
GGCGAGGTTATTAACCTCAGAATCTATATAATCCCATCCAGCAGACTATCCGTTGCCAGG  
TAAAGGGCGCGCAACATGTGTAGCTGTGTAACCTGGCATTGGTAGCCCGGATATTTCGCTGG  
TATATAGCATCTGTTATAGTTGAGGCTAAAATCGTGCCCGGCCAATAATGGTAGCCAGAAT  
CAACATACCCACGGATATTATTAATTTCTTCATGCGTGCCTACCCATCAAAACATAACTGGC  
ATACGCTGCATATATGGTAACTATCATTGCTAGCAGGACACCGTTAAACAATCCCATATCGG  
TCCCACCGGCAATATATAAGAACTGGCAATCATTGCTCCGTGGTTATTTCGCATATTTCACTC  
TGCCCCATATAAATAATCCTATTACCATCACGATACAAATTAGGCTGGTAATCATTTGCCAG  
CTGGTTACATTATTGAAAATGGATGCCAAGCCTTCCAATATATCCCCGATTATTGTTCCATCC  
CATTGATGAGCCCACTCATCCAGCTTTGTCATCACCCACACTCTTCTGGTCATATCCAAACCC  
TGAGTTTGTAGTCGAAAAGATCTTGGGGCACATGGTTTGGAGACCCGGAATTGTGCCCTTGCC  
ATAAGCAGAACCGTATTCATTAACACCGTGCCCTGGTCAGTCTCCGTCAACAGCTTTTGCA  
CCCAGTTAATCTCCAACGCCCGGCAAACCTTCGATTATCCAACCTCCCATTAAGGTCTGATTTT  
CCTTTTTTGTTCAGTTGGCTGTAGTCAGATGTGGTCAGAGTGTAAATTGACCTCTGGCGGAA  
TCTCCAATATTGGGGGTTACCAACCATCTTGAGTATCAGAGCAGTTTCCCCTCCGGAGCA  
TCATCAGCTGCAAAGTAAAAGGCGGAATACCCCATATCATAACCGGCGTTGTAGTAAGCGT  
ATGGCTCAATTGCTCCAGCTGAATAATTCCATCTGTATCCATCAGTCTGAAATGAAAGAGT  
TTATTAGCCGGAGTGGTGGGCTGGCCGGATGAATAGGCGATGGTGTATTTAAAGGAGACCA  
AGCTATCCCCTGTCTCTACAATATTGTGCGCAACCTGCACATCATCAATAGTAAACGTGGTG  
GGCGCAGCCGGGTCAACAGCCAGTACCGCTGCCGGCGGTAAGGATGCCAGACATAAGCAGG  
CAACTATGACGCCTTTATAGATTTTCGTAAATAATCTGCCCATTCATTCACTCATATATAT  
TGCCGGTTCTCTGGGGAGGTCTTCTCCCTTCAGATAGCGATAGACCTGCATCCTGCTGATGCC  
GTATATTCGTGAGATAGCCGTAGCTCCAATACCATGCGTCTGCATGATATATCGCAGGTTAT  
CAGGGAAGGCATCCTCATTCTTAAGGGCCTCAAGCAGCCCGGATCTTGGCCGGAACCTATT  
ATCTTCTGTTCTTCCATACTTTTGTCTACCTGACTGCCTGTTTAATACAAGGTCCTTAAATCT  
CCCTAATTATTTATTAAGATATACCTCAACTGTCACTTAAAGGTGACAGTTCAAGGAAAA

TCTTGTCTATCATCATAGAAAACGAGAGGAGGTGATAAAAAATTGGGCAAGGCAATGTCAA  
CCGTCATGTTAATTGTAGGTATCGCAGTTTCGGTTTTATTTTTCCCGATGGTTCTCTCCTCAAT  
GGATAGTATTCAATTTCGCATCCAATACCGGTACCTATGCCGCCGTAACGACCGGTGTCCGGC  
AAACTACCGCGGACGTTGTTCTTTCCACCGCCTTATAACAACGATGATAACGGTCATGTTACC  
AGCATCACGTCTACGGTTGGGACAGACGTTCCCTGTGGCCGGCACGTATGTTGCTGCTACTAA  
AACCTGACTGTAACCGGTTTAACGGCTTCCGAATCACGGACACTGACCGTCATCTATGACT  
CCGACAATCTGTCCGACTACACCGGTCTGGGCACTATTGTCAGCCTAAGCCCGCTCATTATC  
TGGCTGGTAATTCTGGGTGCCTTGGGTATCGGACTTTATTCCAACGTAAGAGCTAATCCGC  
AAATTCATTCATAGAAAAGGAGGTGACAAAAGAAAATGTTTAACTCAAACACGATGAAGGTC  
GTAGGAGGCATTCTCGGTATAGCTATTTCTCTGCTGTTCTTCCCATCGCCCTGAGCGGTATT  
GATGCCGTACTGAACAACGCCAATTTGGCCGACTATACCGGGTTGGAACCATCGTAAAGAT  
AACCCCATGATCGTGTGGGTGGGTATCTTCCCTCGGTTCCGGCTTAACCTGTTTTTTGGGGT  
CAAAGGAAGCCGCGGGGGCAAAAAATCTAGGTCACGGATGGCCTAAAGGAGATCGTAGCC  
ATGAAGATACTCTGGATGCAATTTGGAAGAGACAAAACCCGGACACAGGACGTACACGTCC  
TGACCGAGGATGGTCGTATTGTCGAAGTTTCTCCGGATGTGCTTTATGGCTGCGTATCTGTGC  
ACGAATGGGGTCAAGCATGGGTGCTAAGGGGTGCAGACCTGTGTCCCTCCCGTGATGGCAA  
GGGAGACATACTGCTTGTTAATGAGCGGAGCTTAGCACCCATTGCGTTTGACGGACGCCCTG  
CACGCACGCACGAAGAGGCGCTGAAACTCAAGGATGATATCGGAGCAGAAGCCTGTGAAAG  
TGTGCATTTTAATCGTGACCGCGAAATAAAGAAAGAAACCATGGCCAATGTACTCCAGGTAC  
TTATTATCGGTCTGTTCCGGCACGGTCTGTGTAATTGCTCTCATAGGGGTATATGCCTCAGGGA  
ATGCAAAATTGCCATGGGTGGGTTAGAAGAAATGACAAAAGCATCAACAATTGAAAAGAAC  
CAGGAGTTAATTGCCGGATTCAAACCTCCTGAAGAAATAATTTTCGTGCGGTATGCAATCAGA  
CCAAAAGGCTAAAAGGGAACCCAATGCCCTGGTTTATGATATGCGCCTAGGTTGGGCTCCGG  
AATATATAGATAATCCTATCGGCCATCGTAAATCATTCCGAAACAAGCGATTATGCCCGATT  
ATCAGGCGCTGGAAACAGTTACCTACTGGCGAATGGGAAAGCAAAATTGAACCGGTCCCTG  
AACCTGAAGATATGGAAGCATCCCCCAAAGTCTTTACAGAATGCTGCATTGGGAACCTTTA  
GTTAAGTCTGCATTTGGAGGGTTGGGAGATATCTGGCAGAAGCTTAAGGTCGGACTGCTGGT  
TGTATTGGTAGGTATAGGGATTTTTGCCCTGTACCTGTTACCCAATCATAAGGAGTAGCTAT  
CATGGCGGGATTTAAACGTA AAAATGGCGGGCCTGCAACCGGAGGCACTACGGATACTTTA  
GGTATCCAAGATACAATCGGTGCGGCCGGTGGCAACGGGTTTAAAGTCAGGATTACTTGATTT  
TGATGCCCTGGAAAACTACTGGGAAATCCTCAGACCGTAAGTCTGGCAAAAGAATTTACTT  
CACCCGGTGACAATGTCCGCGGTCTGCTGATGAGGGCCGACTTCAAGGATGCCAAACAGGT  
ACTCGCGATGATTGAGTACCTCCATCGCTGTAAGAAATTCATTACAAGCGCGGTGAAGACA  
GATTACTGGATTTTATTGCCGCTCTGCCAGCAATTCAGGCCCGCCGGATAAACCTCTTGGCC  
AAAGTTCTTACCCATGGCGTAATGGAAGCTTCCAGCAGGCAGCAGAAAGAACGGAGACCCG  
AATGATCTGGGGATATATAGGTCATGAAGGTGCCGGCAAATCAGCTGCCATGTGCTATTTTG  
ATCTGCTGCATATTGCCAAAGGGGGCGGGCTGTTACCTTCCCGGGCTTCGAAGTGTTAAC  
CCCAATATCACTCTCGATGATGGTAATCATCCCCGTCTGGGCAAATCTATAGATATGAAGGA  
ATTTATTTTCTCCTTCAGTGATGAGCAAAGCTTCGCAACGTGTTTGTCTCTATGGATGAGAT  
CCAGAACTTTTTCGGGTCTGATAAATACATGACTATGTATAATAGTCTCATTACCAAATACA  
GCATGCAGCGCAGAAAGCTTAACTTCGGCATCAATTACACCGTCCAGAGTTGGAACCTGGATT  
GATCCACGATTACGTCAATTAACCCACTTCCCTGACTGTCTGTAAGGATTTGTCACGAACACCT  
TGGGGCAAAGAAGCCGGTTTGAAGCGCGGCCAACTGATAGACCTGGTGACCTATGATTGCA  
AAGGGTTTATTACCGGCGAGGAATGGACTCCTTTGAAACACTTTAACTTAAATATTTTGGCG  
GTTCGCGATTGGTATGACAGTTATTCGACAGTGGATCCGCTGGAAAGTTTTAGAAAAGTGGT  
TATTA AAAAGCCTGAAGATATTTTGGATATGAGAGAGGGAATGCCACGATTTAATCCGCTGG  
ATGATTTCCCTCTTGAGAATGTACCGGATGACGTCCGTGAAATAAGCCAGGAAAACAATGCC

CGGATATTATCCAAACTTGAAGAGCAGGTCGACCCGGCTACTCTTATTCAGGTGAGCAAAGC  
GCTTAGAAAAGGTTAATGCAAAATGACAACGGACGAAGGGTTATTAGCGGCTGCTCAAGCGA  
TTGCAAACGCGTTAGAATCTCTGGGCAATACCCTATCAGCTGCCCTTGACACATCAGTTACC  
ACGCTGATGAGTACGGCTTTATCAACCGGATTGGAATTATTCTTACTCTCGATGATTACTGTA  
TTGGCGCTATGGAAACGCCATATTGTAAGTATTCTGGCAGGGCTCGGGTGGTTTGGTAT  
CAGTTTACCCTCTTCAGCAGCGCTTCACTAATAGCGGTAATGCCATTTCGCAACCTGTTTGGC  
TCTTGGGATATTTATGTTTTATCGGATTATTGAAGACACCCGGCCGGATAGGCCGATAACGAA  
GGAGGATGACATGCGTACAAGTAAAAATATGCATCAAAAGAAGCCGATAGTATCCCGGCAG  
TTAAGGTAAGCTGGCACGAAAGAATGCCTAAATTTAAAGAGTTTATTCCGAAAGACATCCG  
AAGGCGTATCGGGATGCGATAGGAGGCCGAATTATGGGTATATTAGGATTTCTTCTCAGGG  
TAGCTCCGGTAAAATCCTCTCGTATGGGCCACCTAGACAACCAAATAACCAGGTGGCCATTA  
ATGCTGCCCTGCAATCCGTTGATAGCTCAGATTCCAAGAAAATTACCACAGTTGAGATGAAG  
GATGGCAAATGGACGATTACCACTGACGGTGCTGTTTATAACATCGATACAAACGGCCAAA  
CAGCAGATACCGTGCAGTATATAACCAATTATCTGACTAGCCGCGGGGCATCTGCGGATATT  
ATCAAATCAGTTACAGAGCAGATTCCCATTATCACGACACGGGAATCTGGAAACGTCGTTAA  
GAAAAAAACCAGTGCAACTATCACAGATCCTAATGATACCACCAAGAAATACACTGCTGAA  
CCTGTAAATGAACCAGCAAATGATTCTACCGGTGAAGGTGATACTCAAACCTAACCCGATGT  
TTCGGTCACAGTGGATAATTCTACGGCATGGACGTTTACTACCCCTAACGGCACAGTCTACA  
CCGTGCCCATGGCGGGCTTAGCCTGGTCTGACCCTGCCAAAATGCATGAACATATAACAAAC  
TACCTGAACAGTATCGGCGCGCCCGCAAATGTCATCATGGAAGCTGTTAGCCGTATGCCCGA  
TGTAATGGGCGATACAGGCTTGTGACGCGCCAAAACCTGACGAATTTGGTAATGAGATAGAC  
AATACTGAAGAGATTA AAAACATGATCGCAGGGAGTGACCAATCTTTAGCTGCAACAAACG  
CTTTAAAGGCATTCTTAGATGCCAAAGGCTTTTCAACTTTGTCCTCTGAAGATCAGTTTAAAA  
AGGCTCTTGAATACGGGATAAATACCGGCTGATTGAGTGTATGTGCCTCCTGATGCAGGGTAC  
AACGTAGGCCAAAACGCACCGCCCGGAATGCCTGATGATGTGGCCGTCAGCTTGGGGCTAC  
TCCCCAAATCCGAGCAGATTGAATTCAATCTGCCCAACTTTAACTGGGCGTATCTGCCAAA  
GCCGATGCAGATAAGTATTTGCTGAGTTACAGGCTATTGTTGGCTATGAAGTAACCAATA  
AAATCTTAAACAGGCTATGCGCGAGGCACAGGAGATAACCACTAAACAAAACCTACAGGCC  
AGTTCAAAGCTATCTCAGATGCAGTACTGGAAAACATTGCGCAACAAAGGCTATCTGGGC  
AATTCAGATTAGCGGATGTCATAGGACTAAAGCCATCTGATATATACAATAGAGATGGTAGC  
CTGAATTCTGCCAGAATAGCTACTTCTCGGTGGTAAACCGAGTGATTACAAAACGATTGA  
TGATGTTCTCAGAAAATCAGCTGATCAGGATTCTGGTTTAGCCCGCGATGTTGTCAAAGAGA  
TATTCTCCTTTGGGCAAGCTCAAACGAAAACCTTTCAATAGAGACGATCTCTCCAATGAATAT  
GATAAGGCTGCCTTTCAAGCTTCGGTTAAAGGGCTGGAAATGGCCGAGGGCAAAGAGGAAT  
TCATTACCCGAATAATCAAGCAGCAAATAACCGGAGAAATTGTCTCAGAATTTGCTATTTAC  
ATGATTCCTATAGTCGGTACACTATATTCAATCGGTAAGGGGGATTGAGGCGGTCAAATAGC  
CTTGTCAGCTGCTATTGATGTCGCTACCTTTATTCCGTTTCTCGGTCAAGCCGCTGCAATAGC  
ACGGGCCGGGGCTAGACCCGCTGCAGCATTAGGTAAAGCGATATTGGCAGAGGTAAAAGCG  
CCTCTAACCAAGTATTCTACACCCATTAGCAACTACGAAAGTGGCTTTAAGTCCATTTGAAAC  
CCTGATTGTGCCGCACAAAATACCTCTTAGCTCAGCTGAATTAAGCTTCCATACAGTCCGCCT  
GCCTGTTGTGGATGTTGGAGGCAAAAAGCGCTTGCTATGGCTCTCCGGGATGAAATAACTA  
AAAAGGCAATTGCCGGTAAAACCGCTAAATTTACTAAAGACGGGGTAACAGCGGAAATCCA  
ACAACCGCCTTGAATAAAACCATAGCCCCAGCTGTAATTAGTGCTACACCAGATGTACGCC  
CATTCTTAGACGGCCTCACTGTAGGTGTAGTTAAAGATGAGGTAACAGGCGCTGCCTCTGTA  
GGTAAAGGCCGGGATTTATTTGTATCCCCCTCACTGCACACCAAGTTTTCCATGTCTACAGCC  
GCAGGTATTGCCGGCTCAAAGGCGCTCTGAAGGGCGCAATTATTATAAGAGACCCGGAAT  
TACTATCGAACTTAAGGTCTCCGGGAAACTCTGGGCTAGTGCAGCGGAAATAGAGATGCG

GCTGCCGGCTGGTACCAGATTGCCAAAGCCGGATCAGTTTTTGTATTCTCGTGATGCTTATGG  
GGATCTCTTACATATATTAGTCATCAACGGCAAAGCCTCTCCACTTACACAAGCAGAAAATAA  
ACCAGATGAAGATTATTGGCTCAGCTGACACTCTTAAAAACATTTTCAACCCTGGCACAAAA  
GCTAAAGTGACCAAAAAGGCAGGTA AAACTACCCCATATGATGAATTGATTGAAGCTAATA  
AAAATGTA ACTCAGATTA AAAAACA ACTGGAGCAATTTAAAAAGACTGGCAGAATCAGCCC  
TATGCCGGACGGCGTGTACGCTCTCGGTGATCTACACGGCAAATACAACCAAGTTATGAGCA  
CTCTGACCAGAGAAGGTTTTGTAGATGAAGCGGGTAATTGGATAGCCAAAAATACAACCCT  
GGTACAGGCCGGTGTATTTGTGGATCGTGGTTATGGCGGTACTAAACTGATTAATAAACTGC  
AAGCCCTTGATAAACAGGCTAGTAAGATGGGCAGCCATATAACTACTCTTATGGGCAACCAC  
GATATAGTATTTGGAGCAGTAGCCAGAGAGCTAAAAACCCTTCCTGCGGAGCTTCTTAGCCA  
GGCTGGTAAAGTACGTTTCGCAAGAGCTGCTTAGTAAATGTGCCGAGTATTCAGGAGTATAG  
GTAATGAATCCTCAGCCAAGTTAATGGAGACGTTCTCTAATGGACGCGGGCACGTTGCCGAA  
GCCTTGT CAGCTGATAGCAAAACACTGGAATGGCTTAAAGACCGCCCGGCCATGTACATTAA  
AGATGGAGTCTTATATGTTTCATGCAGACAGCCCCAATGTCTATATGCAGATCCTGAAAGAAG  
CCAAAGCCAAAGGTTTTACAGGGAGCAATCTTGAAATCGTCAATAAGTACACTAAAGAGCT  
TGCTAAAACCACCGAAGGATCCCAGCATCTATATGATTTGATGGTCAAAAATCGCTATCAGA  
TGACCAGAGAATCAGCAATGGAGATGCTAAAAACATTTGATGCTGACAGACTTGTTACGG  
ACATACGCCCCAGGGCGGTAAAATAACCAGTAAATATGAAGGTTTGGTAACTAACATAGAT  
TCCGAGTCAGGTAATGGTGTATCCCGCATA CATACATAGGCGGACAGGATATCAAGTT  
ACTGCGTAATAATTCACGGGTGATAACACGAACTGAATTGGAAGCCGAATATGCCCGTGCTC  
TGGAAGAATTCAGACTGCGTGACATGGCGGTTAGGCGTGGCTATACCGTACCATATAGCGTT  
ATAGGGTTAGCAAATAGGCAGACTCGGGTATTTAGACGCGCAGAACAACCGGCCGCAGGA  
TAGCCACCTCGAAGGAAGCACGGGTAGCTCCAGAAACAAGACGTCCTGTATCAAATAATCG  
TAGAACTGCTGCTCTTCCCCGTCACGGCAGGAGCGGTATAAGAGTTACTGGTAATCTCCCTC  
GCTATACAAATACCGAGCAGAGAACGGCTGTATCTACA ACTCGAGTACCCAATGAAGGGCG  
TGTTAACCCTCCCGAAACCAGAGTTAATACTCCTGTAGTAACGTGCCACCCCGCCCGCCGA  
TAGGTA CTTACATCCCCAAATCACCTGATAAAAATAGACAGGTAACCACAGAGACAACCCG  
TCCGAAACTCAAACCGGAGATGTGGCATGGAAACAAGGCGCTTTAGGCAGTGGTGATGAT  
CAGCGTCCGGTATGGTATATAAAGCGTGCTAACGGCAAGGTTGAAATAGTTTTCCAACCGCC  
TGAAGATGCTCCGAGGCTTGAAGGCACTCCTAAAGAAACGTTTTTTACTCGTGGTAAAAAAC  
CTCCAACAAATCTCACTCAGGAAATGGGTGTCACTACTGCCCAGATTAACCTTGAGCGCAAC  
CCGAGGATTGATTTTCGTACCCACTAAGGCGCCCAAGTTTAAACCCTATATTCCATAAAAATGT  
TAGGCGCTCAATTGGTATGTGAAATATCTTGACTTTTTGCCATTGTAATAATTAATATTGGGT  
ATGGATGAAATTGATATTGTAACAATATGTTTGACCATTATAGTTGCTCTATTAATACTACCT  
CAGCTTTTGGCCATCATAGTTCGCTTCTTAAAAACCATAATCAAAGTATTATTACGTCGCA  
TATTATAATATAGCTGACTCCACGAAAATGATCTTATCCGGTCCTTACGAGAATGTAGTGGA  
GTCCATTAACCATGTA ACTAATAAGCCTTATATTT CAGAATGTATT CAGTACGAATTGAAAA  
CTACAGACTTGTGTAAGGCCATAGATCAGATTGAGGCTGGAGCTAAATACGCGCGTATTTTG  
CAGATAAACCGCCCTCCCAATATCAAGAATTAGACCAGTGACAAAGTGTCACAGATATTCG  
GAAGATATGCGAAAGGCCGGGATGAACCCGGCCTCTTTGTTCTTGGAGGTTAAAGATAATG  
AGGAATTATACTAGTAGTACCTAAGCCTGTTTTCGTCTATTATAAGGTGATTGATTGTTAGGC  
TTTAAAGATATATCCTCCTTACCAGCTTTGTCATATACTGCATTGAGAGTTCTCCCCAGCTTC  
ACAGCTATTAATCTTGTTGGTGTATTTCCCTCCGACCAATACATTTAATTTACTAACATCTTCTT  
CAGTCCATCGTTTCCCACTATTCTTTTTCGAATCTTCCACTGCAAGCTCCTATTTTTATTACAA  
ATGGTCCGCCCCCAAATATCTTTACCCCTCAATTTAATTATACTCAGTCATGCAAACGTTTTT  
TTAAAGCTTCAAATTATCTACTGGGCTTGCTTGCCGGTGGACTCTCATCATATCTTCTGTACC  
CAAAGTAGAAGTATAACGCCTGGTCATAGCAAGAGTAGTATGCCCAACATGATTTGCAGG

GTAAACTCATCCCCACCATTACGTAGATAGTTTATAGCTGCCGTATGCCTGAAAGTATGAGG  
TCCTGGCTTAGCATCAGTGATATTAGCCCTCTTACAAAGCTTTTTTATGGCTTCCTGAACACC  
ACGACAAGTAAGTGGTCGACGTTCTTCTGTAAACCATAAACATTGATAATCATCATCCCTATT  
AAGCATATACTTTAACAAGGCTTTTTGGGTCTGTTTGCCTATTCGAACAATCCGTTCTTTTGA  
CCCTTTCCCAAATACACGAACAGTTTCTTGATTA AAAATCGATGTCATTAATATTAATGCCGGA  
AATTTCTGCTAATCGTAACCCTGTATCCATAAAACAAAATATTAAAGCACGATTGCGTAATC  
CTAAAAAACTTGTTTTAGCATTAAACACCCAATAATTTTTTTATGTCCCAATTGAGAAGGGCT  
GGATTACTTTCTTATCTAGCCTCGGAGGTTTTAATGTGCGCATTGGATCGTTTGCAATATAAG  
CCTCTCTCATTAACCAATGTATAAAGGCTTGGAGTGCACGATAATATGCATTCACAGTGTTA  
TTCCCGCACCCTTTTTCTTGCAAGGATAACAGGAATGCCCGTATTAATTGAGGAGATATTTCA  
GAGGCTAACTGGAGACTGAAGCGATGACAAAACGACACAAAACAGTTAACACGCCGACGGT  
AAGTATCAACTGTTTTTGGAGATTTACTCTCTACTTTACATGAAATTAAGTAAAACCTCGAGG  
AGCCTTTTTAATTCATTTGATGCAGGACTGTGCTCTATGGCACGAATGAGCTCATCGTAATTA  
ATGTTGTCAGGACTGTGCTCTTTCAATTCATTTTCGGCACGGGGAAGGCTGTTTTTGACTGTT  
TTTAGCTTTATGGTGGGCCATCTTGGTCTCGAACCAAGGACCTCAGTCTTATCAGGACTG

>Dmc\_IME1-5

ACAACATGGTGGGCCATCTTGGTCTCGAACCAAGGACCTCAGTCTTATCAGTTCCAGCCTTT  
AAAACCAGTAAATCCTCTTTTAGCCGCTCCTTTAGTGTTTTCAATCTTTTGGTTACTTCAATTA  
TGACAGCAATAGCCTGGCATTCTTTAACAGAGTGAGTGCCTTGCCATTTTTTCAGGATACATT  
CGCCGTTTTGCTCTATAATTTTTGCCACTCGGAGTTCGTGTCGATAAAGACACAGTACAATGT  
CCCCCACCTCAGGAACCATATCCCTGTCTACAACAACAATATCACCATTCTCAATCTTGGGCT  
CCATACACTTACCCTTAACGATATATGATTCTATATTATGCCGTGGTGCCTCACGTACACGTG  
TCCGGTAAATGTATTCAACTGGAGCAAACCCACTATCCCCTGCGTGCGCCCTAAATTCAGTA  
TAAACAGGTATGCTCATGGGAGTAGCCAGCCGTAACCGTTCTAGTATCTCTTCAGGACTCTC  
TGGGCGTGATAATGGTATTGTGGAAGTTGGATTGTGAATACCCATAGATCTATATAAGTCAT  
CCACATTTATGTTAAATGCCGACGCAAGTTTTACTAACTTATCCACCCCTGGAGTAATTCTCC  
TACTAGATTCTAAGGCTTGTATAAGTGACCTTGAAAGACCTGCTTTATTTGCAAGCTGCTGTT  
GAGACCAATTCTTCGCATCTCTTAGACTACGTATTTTATCCGATAGTTGATTGATTTCAATCA  
TGTTCAATTTGCCACTATTTTAGCAGGATTTAAGCAAAAATAAGAGCCTCAGCGAGATATTTT  
ATAATAAAGTGGCTCTCTTTATTATCCATTGGCTACTATATTATCTATTTGCAGTTGTGTTTTT  
TGTAGCCCTCGGCTACTATTTTATCCATGAACACATTACTCGAGCAATTGATTACTGAACAA  
ACTACTCGTCAAATGAGCGATTATCAATTTGTTAAATTTTTAAATTTCCATAGCAACGCTCAT  
GTATCTCGACAACCTTTGGCATCAAACGCGGAATAAGCACATACCTTTAGGTTTTAAAATCCT  
AAAAGCGACAGTGCAAACATTTCCGGAGCTTGAGACTGCCGCCATCGATTATCTCAAGAAA  
AATACTAATCATGAGTAAATCTGATTGTGGTAACGCTACCTTGTTGAAATACGGTCTTGAGT  
ATTATCAAGCAATTGGCCGATTGGGCGGCAGACCAAAAATTAAGCTATCCGATGAAATACA  
AACGCGTACAGCCTCCTTATCTGTATTGGTGAAAGGAGAACGGCACGGGGAAGGCCAATCT  
CTTATGGCACTTAAGAGGCTGTACGCAGAAAGGGGAATGAGGCAATGCCTCAACAACAAGT  
GACTTATCGTATCAAGAATGAACGCACCGGTCAATGGTGGGAGGGAAAAGCTGATAGCCCG  
ATAGATGCCATGCGGAAAGCCTCCCTCGAATACCCGGTAAAAGCCCTAGTACCGGCTGGA  
CAGCTGAAAACCTGCTGGGTACGTCAATGGTGTCTGCTGGTTATGGCTCATGGGTAACCCAG  
ACTATGTCCGCAAAAACAACAGAGATGGTGAAAGCATGAAATTTCTTCCACGTGCTTACCGG  
GTAGCTAAAAAAGAACAGGAGAAATAATATGCCTTATAAAAAGATATTTCCCGGCCAAGATA  
GTAAGTTTTGACCCTTATTTTGAATGGAACGTGATGGTCTTAAGTCATTTATTATCGTCACA  
GCATTTTCTATGGATGCACCGGGCAATCTATTGTTGGATGAATTTCAGAAGTCAGAAGTCCC  
TATACTGATAACAATCCATAATCCCCAAACCTGTCAATCATTTAATGCCTACGCAACCAAAG

TTGTGCAAAATTCTCCCGCCCGTTACTGGAATACCATCCATATCGACACAGACCCGCATACGA  
AGAGCAGAAGAAGCGCAAACAGCTATGGCAGGCTACCCCAAAAAGGATGACCTTAATGACT  
AGTGGAAATGGTTATCTTGGCTGAAATACGTACCGAAACCCAGCAAGGCCGTCCCGCCCCTAC  
CACGGGCTGGGAATGGACTGCCGGTGATACTCCAAAAACAGACCCTAGCCCAGGTACCTGG  
TTTGTGCGGCGCATGGAAGACCGTTTCGTTGTGTTTTTCCGCTCTAAACTGACACCTGAACTA  
AAGGGCAAAGGACCTGAATCCCAATCCTGACTTTTCCGCCTACTGAGGCAGGGGAATATGT  
AGCCCGTGAAATGGCAATCAAACACTACGTAATGAATCATACCGACAGGAGGCTGAACGCAAT  
GGTCGTAGCTACTTCGTCTAAACCGATTGAATTGTCACCCCGCCGCTACCGCAAAGGGAATT  
ATATGTTTTGCCAGTAAAAGCCGACCGCAATTACAAATGCCCGGAGTGTGGTTGTCTGGTA  
CAGCCAGGGGAAGTTGGATTTACCCGCTTTAAGATTATTCATGATCTGGTAACTGAGCCTGT  
CTGGGATGTACTGCATGCGTGCTGCGTGGAGGCAAGGGAATGATAAGAATTAATAATTGGTC  
ATCTAACGCTCTCTGCGGACCTATCTCAATCCGGAGATGTAATTATTACCTTGAGGACTGAA  
GATGGCACACCTGTTGCTGCCGCCAACTCAAAGACACTTATTGCCGCTATTGAGGCACTGGA  
GAAGACAGCGGAATAACATCCAGGACGGACAGGGGAGTGTGATCTCCCTCCCACTTCCCTG  
TCCGTCTTAAAAAACACAAAGGAGTGACATATGGTCGTATCAACACTGAGTAAGAGACCA  
ATTCTGCAAACCTACCCTTGTACCCACTGCGGCCGGGAGACCGAATGGGATTTTGACCTGGG  
CTCCAATCCACTATGCGCATACTGTTGGGACAACAGTATAGAAATAACCGTCAAGGTTGAGC  
TGGCTGATAAGATGCGTGCCTACCGCCAGGAGCATAAAGGTTGAGCTGGCTGATAAGATGCG  
TGCCTACTACCAGGAGCATAAAGTTGAGCTGGCTGATAAGATGCGTGCCTACTACCAGGAGC  
ATAAGGTTGAGCTGGCTGATAAGAAGCGTGCCCGTTCCGGCTATTTCCAATTAAGTAGTCTGA  
AATGAGGTCCAATATGGTAATAGCAATACGAAAATATACGATAGACGATATCCTTGCCCGA  
CTTCAGGGCGTCAAAAAGAATGGATCCGGCTACATGGCCTGCTGTCCTGCCCATGAGGATAA  
AAACCCGAGCTTGTCCATCAGTGAAAAGGACGACAAGGTGTTACTAAAGTGCTTCGCCGGG  
TGCAGTTATGAACAAATCATGACCCGCTTAAATATGCCAATAAATGCCGCAGCACAGGATA  
CTACAGCCACCTCTTCAAAAAAACCAAAGAGAGCACCAAACGGGAAATAAAGCAGACTTA  
CGACTACACAGACAGAAGCGGACAGCTGATATTCCAGGTAGTCAGGTTTGAGCCCAAAAGT  
TTCTCCCAGCGACACCCTGGCGGCAAGACCGGCTGGGTCTGGAATATGAAGGATATCGAGC  
CGGTTATCTATCATCTGCCAGACGTGCTGGAAGCGGTAAAAACAGGCCAGACTATTTGGATA  
ACCGAGGGCGGAGAAGGATGCTGATAACGCCAGGGCTATGGGCTTGGTGGCCACTACCTCCC  
CGATGGGGGCGCGCAAGTGGCGCGATAATTATACTAATGACTTATTGGGAGCCTCGCAAGT  
AGTAGTTATTGCCGATAAAGACGCTCCGGGCCGTAAACATGCCTCCGATATTGCCATGTCCT  
GCCGGCGGCAACGGATACCGGTCAAGATTATCGAGGTACCCGGCGACGCCAAAGATTTTAC  
CGAGTGGTTGGAAGCCGGCGGCCAGACATCCGAATTGGATGATCTGGTAGCTACAGCTAAG  
AGCTATACGCCATCAAAAACAGAGCTTATACTTTCTGTCTGATGGCAAGTTTTCTATCGA  
AGCCGGCCGGATTATTTATCATTACATACAGGGATAATGTCCCCTACGATGCTCCGCTGTGCA  
ATTTCTGTTGCTGCCGTTAAAGAGGAGATCATCAAAGACAATGGCATAAACCGCCAAAACCTTC  
TTCAGGATTGGCGGTACAGACTGTACTGGCCGTCCGTTTCCAGATATAGAAGTCCCGTCCGA  
AAACTTTTCATCCATGTCCTGGGCATTATCCCAGTGGGGAATTAAGGCTATGATCGAACCCA  
GCCCTTCAGCTGAACGGCTATTACGCGGGGCAATGCAGTACATGTCGATGGAGGCACCCTGC  
CGGATTATTTATGAAAATACCGGCTGGACTAATATCAACGGCAAGGATGTTTACCTTACTCC  
CCACGGCGCAATCGGAGCCGATAATGTTGAAGTGGAATGCCATCCAATATCAGCCATTATG  
ATATAACCCTCGCCGAACAGAATGACGATGTGAAGTCCTTCATTGAGGCCAGCTTTAATTTCT  
CTCAAAGTAGCCAAGTTATATATTACCTTGCCGCTGTTTGGCGCTATGTACATGACGCCTTTG  
TCAGACGCCATTGATACCAACTTCAACCTCTGGCTGATTGCCGGTTCTGGCAGCCTTAAAC  
CACGATAGCATCACTGGCACTCTGCCACTACGGAAATTTTGATTATACCTGTGTGCCGGCTG  
CCTGGCGGGATACTCAGAATACTGGAACGCATCCTGTTACCTGCAAGGATATGCCGGTG  
CTGGTAGATGACTGGTCACCCGGCCAGACCACCGCCTCACAAAAGAATTTGACGCTAAGG



CTGACTATGTATGCCGCGGACAGGCTAACAGACAAGGCCGTAAGCGCATGTCTGCCGATAC  
ATCTATGAGGCAGGAATATGTACCCAGAGGCTTCCTGATATCCACCTCGGAAGGACAACCGC  
CAGGCGAGAGCAATAATGCCCGTTTTCTGATCATTGAAATGTCAAAAACAGATATCGAATTC  
CCTTGTCTTACCCTATCACAGAAAGAGGACCATCTGTACCGCCGCGCTATGGCTCATTACCT  
GGCATGGCTGCAAGCGGACTGGCCGGCGAAGAAAGTGTATCTGCGCCAGCGCTACCAAGAG  
GTTTTGAACAATTTACTGAGAGTCTCCGGGGTGAAAATGTGCATCTCCGGCTACCCAGATC  
CATCGCTCTGTTATATATCGGTCTGAAAATGGCTATTTCGCTGGGCCGAAGAAAACGGAGCAG  
CGGATATATTTGATAGGTTTATAGATGAAAGCGGAAACGGGGAGAATGATTCAGTCGGGTC  
TGCGTATCTCTTAAAACAAGCCCGCGAAGTATTTATTGAGATGGCCAAGCGACAGGGTGCC  
GGATAGATGAGGCTACACCATCGAAAAAGTTTGTAAACGCCTTAAATGCAGCCCTTATAGCT  
GGTACTGCATATCTGGATGTTAAAGATGGGGCAAATCCTCGGTCTGCTTACCTGGGCAAAC  
TCTGATCGGTTGGGATGACCGGACTAACGGGCACGTTCCCTCCATAATGACCTGGCCTACC  
AAGTAGCCAACCAGCATTACCAAAAAATCAATGAGGCTTTTGTAAAAAGGATGCTGTATTT  
ATGGATCTGGTGAAGCGTGGTTATGTGGATCCGGGTAAAGATGGTAAAACCACTGTCTTTGA  
GTATATCCCGGTAATAGCAAAGGCATGCCGTGTCCTACATATCAAACGTGAATTCCTGGGGC  
GGGATGAACAAAAGAGAGGTGAGTAAAACAATGAAAAAATGTGTGTGCGCCCCAAAATAT  
CCCATGTATTAAAAAATGGTGCAAGAAGTGCAAGAAAACACTGTTTTTAATCGTAAGCCAAA  
ATATTCTGAACGTGAAATTTCTTGCACCTTGAGGGTGCAAGAGGGTGCAAGAAGTGCAATAC  
AGGTGCAATACAGGTGCAAGAGAAGTGCAAGAAAATATAAAGCTAAATTA AAAATAGGTGC  
AAGAGAAGTGCAAGAAAATATTAAGCTAAATTA AAAATACATACTCGTAATTGTCAATAT  
TTCTTGCACCTCAAACAAATATATATCACTCAGTTTTAGGGTGACACATAAATCGGTATGT  
AAGATTGTTAAATCATTCTCAAAGGATGTGACATAAATGAAAGTCGCGTTATATGCCAGGGT  
AAGCACCCGCGATAAAAATCAGGATCCGGAAGTCCAACCTGATGGAGCTGCGGAAATATTGC  
CAGGAAAACGGCATGGAAATAACCAGGGAATATATAGATCATGCCTCGGCCAATGATTTCCG  
TCCGCAGGACGGCATGGAAACAGTTGTTAGTGGATGCATCTGCCCGAAAGTTTCGGGGGTTA  
CTGGTGTGGAACTTGACCGGGCATTCCGCGACATTACGGTGGCCACCTCGTCCGTTAAAAT  
GCTGCGCAATGCCGGCATAGATTTTATTGTTACCACTGTCCCTGTTCTTTCAGTCCAAGGTCC  
AGCTGGAGACCTGATGTTAACATCTATGCCGCTTTTGCCAGTTTGAAAAGGACACCATTA  
TTGAAAGAGTTAATGCCGGACTTTC AAGGGCAAAGGCTAAGGGTAAGGCATTCGGTTCGCC  
AAGAAAGGCAATAGACTTCAATAAGGTTTTGGAAGCCCACGAGATAGCCTGCTCACGGGTT  
AACCGGATTACTAAAGAAAATCAGGGTTATTCCGAGACGGCGAGGATATTGAGCGAGCAGA  
CCGGGCTAAGAATTACAGCCGGTTGGGTCTATAACCGGCTTAAGGCCGGCAATTA AAATGCT  
TCAAAAACCCACCCCATTTTTGCATAAATTTTAAAGCCAAAATCTTATCGGATGGGAGG  
CTTCAAAAATAAATGTTTTTTGAAGATGTTGAGCTACTAACTTGATACCCATTATTCAAAG  
AAAGTCCAATTTGAAAGGAATGGCAAATAAATGAGACATCTTAAGGCGGTATGGCAAGGCG  
GTTTATTTATTGAAGGATTACGTCCGAAAATAGATTACACGAAAGCCCCGGAACACATCAT  
TTAATAGTCACAAAGGCGAGCCCCCAATTTGATGACCAGAACCTTATCGGTA AAAAGAGTAG  
CAATCCCAGTTTGTGGACCTATGTATTGGGAAGTTATGGAATAAGCGCAAAAAAACGGCAA  
AAATAATGCCCTGCTTAGTGGTTATTTCAAAGGTAATTGTGCTAAACCGTAAGACCCCAA  
AATTCACAATTGTAAAAAACA CTGTCCTATCTGACTAAAAATATACTAAGGGAAAGGAAAC  
GAGATGAAAACCGTATTA ACTAAAATCAAGGGCATCACCCATTATTAATGCACAGATTCCC  
GATGGCGGGCGCAGACGATACATAAAACGACGTA CTGGTGTACCGGATTGGAAGGCAGAG  
GCAGAACTAGCGTTATACAAAGATGATCATGGCCAAATCTATCAGCCAGCGAGCCATATTG  
AAGCTTCGCTTAAAGAGGCCAGTAAAACACTAAAAATACCAGGCAAACGAGGGGCGACCTA  
TTCAAAACTCATTGGTTCCGCTGTCTCTGTTTCCCCTGATGCTATCACTCATTTAATACAGAA  
TTACGAAACAGATAGCCGTCTGTTGTGATACAGAAAGCACGGATAGTACGCTACAGGCCA  
ATATTTAAGGAGTGGGAATTGGAATTTGAAATCAATATTGGAGATGAACAAATCCCTATAGA

GGTTATCAAACAGGCTCTCGATCATGCAGGGCTATATGTAGGTATAGGCGATTTTCGCCAG  
GACGTGGAGGAAAATTCGGCAAATTCATGGTTGTCAGATTTGAAGAGAAATAATATAGTCC  
GTAGCCCTGCGGGTTAGTCAGGTGAGGTATGGCTCGGCTTGGTTGGGCGTGGTATGGTCAGG  
TACGGTTAGGCACGGTATGGCAGGGTAAGGTTTTTAAAAATTACACGAGAGGAAATACTCA  
AATCTGATCTTGAATCGGGAGTTAAAGAAAATTCTTACAGCTGTTGGGAATAAACACAAAC  
AAAGAGTAATTAGGAGAGGGCGAAATGGTACTGAAACGAAAGGGATATACGAATTCAGCC  
TGGCTGTAGATGCCATGACCTTGGGCCAGCTGGGCCAGGAACTGGATAAATGCAGCCAAGA  
ACTGGGGGGCTGTGAATATTGCTCACAACAGGCTATCTGTTTGGATCTATGGCTGCACCTGG  
CAGATACGGTAAAGGATGATTGTGCGTTAACTGCCCGGCAGTACACTGTATATGCTCTAGAT  
TTTTAAAAATATTAAGGCCCGACGGCAGATGATCCTGCCGTTGCTTATCGCCTAAGCGCCGAA  
TAAAGACCCCGACAGTACCCGCACTAATAGGGAACAGGAAAAACCATTTAACAAGTCCGG  
CTGTACCTTCAAGGAATGAGTAATTCCAGAATAGTAAGCGTGGTATCGCATAACGTAATAAAC  
CCATAAATACCACCTACCACATTAACAACCGTAACGAACAAATTACCGATGGCACTATCTGA  
ATACTGCATAACCGAAAACCAAGCAGGGCATTGAAAAATGACTGTTCTGGGTCTCCAAGC  
CAAGTCCCCTCAAATATCAGGCACATTACTTGACCTATGATATAGCTATAAACAATCCATAC  
CAGCCATTGCGGTCTCATTAGTAACTCGCCAACTTTCGATTTGTCAATTCACCGATAATCACC  
ACTGCAACAGGTACCAATACCCACCATGGCACACCTATAGTCGCGCACCAGAAGACTTGCC  
AAATGAGCCCTGCAACTGCACAGGGTAGTAATTTACGCGTTAAACCAATGATAGGATAGT  
AATTATGGCCCCGCCGCAAAGCTAGGCTAAGCCAGAGAAATGCAGATGGGAAATTCATC  
TCTTCCAGAAAATCTGTAATCTGCTGGCCACCGGGCAGGTTTTCCGGATGCAGATTGACATA  
CCACCCGGTTCGGCATAAGTACCCAGATCATCGTCTGTCAATCTCAACCCGCATCTTCGTCATC  
TCCCACAATGAAGGCTGACTGGTTGCAGGCAGCATAAATTAATCACGGCCACGCTCACATCTG  
CGTCAGTGGTTGTTATCCGGAATGAGGGCGTGGCATCATTACTATTCCCGGATAGATCCGTA  
AATGTAGTGGCGTATTGCCATTCACGAGCCTTTTAATACCCACCAACCGTTATTTTTGCA  
TAGTATAAATACGGCATTGATCCGTTCTGGGTAAGTACCAGTCATTGACATTATCAATTAT  
AGAGCCAGCATAAGCGGCTGAGCCCTCTAAGAGACCATCTATATAGATATTCATCGTGCCTG  
CAGATAAAGATATCTTATATACATGTTCTGAACTGGATATATCCGCCCGCGTAACGATTGTA  
TTATTTGCATTTCTGTTATTGATATATTTATGTCTGTTGTAGCAGTGCCACTCCAAGTACG  
CTGAATTATTTGTAGTGCAGTATCTGCCGTTAGCATAACGGATTAGTAGGGTTATACCAGTGA  
GTTAATTTATTACTGGAGTCCCCGTTTGGGAGTGACAAGACTATTGCATAACGTGTTCCGGC  
AGTTAGATTAATTATATTGGAAAAATCAAATGTATGATTTACAGCAGAAGTTGAGATAGTTG  
AAGCTACCACCGAACCGCTAACCAAGGCACTTCCTGTTGGCACATCGCCGCTAGTTGCATAG  
ATGGCATAATTAATAATTTCCAGTTGGATTGCCTACTCGTTGTGTTCTAAAGGTAAATTGGTTG  
ACAGCCACATCATTAGAAAATTGAAAGGTCTGTGCTATCCAGTTAGCACCGTACATAGATGT  
AGCTGAATATGCAGTACCATTATATGGAGTTTCTGTATAACTTGATGAATTACCTGCCGATA  
CATCTGTTCCAGACGTATAAATCCAGAATGCTCCAAATTTAGATAGGTTATAGCCATCATTAA  
AATCTACCACTTAACTCAATCTCAAATCATTTCGAAGCTCAAGTGTGCGGAATCAACAAC  
GCTCATAACCGGCTGTGCCCGGGAATAGGCCAGTTTGCCCCCATGGCAGTTTCGCCGCGG  
TATAGAGGTTGTAGTTAATAGCGGAGTTCTGGCTGATCTGCTCAACCCACATCATCCAGGGG  
TTGCTGCCATAACCTGGCATAAAGGGTATATCCAACCCGCGGAGTCTCTAAGTGCCAGATT  
AGAAAAGTCCGGATCTATATAATAACCATCCAGCAGGCTCTGGGAAGACCAGATAAATGGC  
ACAGATACCTGCTGGGCGGTATAGCTGGCATTGTGGCCCGGATATCCGCCATATAGATAGC  
ATCCGTAATAGTTGAGGCCATGATCGGTACAGCCCCTGTAATGGCCACCAGGATAAAAGGA  
ATAACAGATACCAATAATTTCTTCATGCGTGCCTTCCCATAAAGACATAACCGGTGTA  
GCGTAAATAATGGTAATAATCGCTAGGATAACCCCGTTAAATAATCCCATGGCCGTACCACC  
GGCCAAGATATAGGAACCGGCTATCATAGCCGATTGATTATCCGAGTATTTAAATTGTGACC  
AGCCAAATAAACTACTACTAGAATCAGACAAAGCAAACCTGGTAAGTATCTGCCAGCTGAC

AGCGTTATTAATATATCAGCCAAACCTGTTAGGGCATCACCCACCACAGTGCCATTCCATT  
GTTCTGCCCAGGTAGTAAGCATATCAGTGCCCATGTCTTCTAGTAAGGTCTAACCCCTTGTG  
CTTGGGTGGAATATATCTTGGGGCACATAGTCTGTAATCCGGGGATGGTTCCATTACCATAA  
GCAGCTCCGTAGTCATTAATACCGTCCCCTGGTTGGTTTCGGTCAGTAATTTAACTGACCAG  
TTGATCTCTAGAGTCCGGCAGACTTCTATAATCCAATTACCCATCAGGGATTGATTTTCTTTC  
TTAGTAGATAATTGGCTGTAATCGGAGCCAGTCATAGTGTAGTTAACTTCCGGAGGCGTCAC  
CCAATACTGAGGGTTCCCCACCATTTTGGAGTACCAGAGCATCCTCCCAAGTGGGAGCATCAG  
CAACTGCAAATAGAAGGCTGAATACCCCATGTCATAACCGGCGTTGTTATAGGCATAAAG  
CTCAACCGCTCCCAGCTGGGTAACGCCATCTGTATCCATAAGGCGAAAATGAAAGAGCTTGT  
TGGCTGGAGTAGTTGGCTGCCCTGATGAATAGGCAATAGTGTACTTGAATGCTATCAGGGTA  
TCACCCGTCTCAACAATGTTATGGACCGCTTGAACATCATCCAGGGTATAAGTAGTTGGAGT  
AGCAGGGTCAACAGCCAATACCGGAGCAGCAGTAAATAGCGATAGTATTATGGCTATTACT  
GTTGCGAGGGCTGTTCCGGCTAAAGACCTTCGTATATCTTCTGCGCATCTCTTTATCACCATGA  
ACGACAGGGGGTCACGGGGAAGGCATCGACCACGCCTCCAGTTAAGCAATGTATTCCCTGTG  
TACCCAGCAGGTTTTGCAAGTGCCTGGTACTGCGATGCCAGTGCGAAAGGATAAGTTCTA  
TATCATCTCTAAAGCCTGAGATATCTCCATAGCTACACCTACCACTGTTAGCCTGATCGGTT  
TTACCCTTTCCCTGTGTTATCTCCATGCTCTAAGTCTACCGACCTCTCAAATTAAGTAAAGGCA  
ATTCAGGTGTTAAGGTATTTATATTAATTATTCATATACCCTCAGTGATTTTCGCACAATACG  
TTGTGCGAATTGGGAATTTAACTGGTTTATTATTCATCTCAAAGCCAAGTTTGACTGAAAGG  
AGGTGAATAATTTGAAAGTATTTGGTGCCTTGCAGGCTATATTTGGAGTCATCCTCCTGTTTA  
ACTTCATGCCAAATCTGACTAACTCTACCCATGATCTACAAACGGATGCGGCTACCCAAGCT  
TTTCTGCCGTGACTACTGGAGCCGGTGAGACAGCTGCTGATGTAGTACTAACTACAGATCC  
TTACCAGGACCGCACTACATCAATAACCGGTATTATATCGGACAATGTATTGGATGTTAACC  
CACTGGTTGCCGCCACTTATAACCACCGCTACCAATACCCTACATGTCACGGGTCTGGTAGCT  
AGTCAATCACGAACTCTGACCATCGCTTATGAGACTGACGCCCTATCGGACTTTACCATGAT  
GGGCACAATCGTTGGTTGGACACCGGTTTTGATTGTAATAGCCGTTTTAGCAGTTATTGGCG  
GCACAATCATGGCTCTGATTCCTCGGAGAGCATAATCTCAACATTTTAAACAAATTAGTAAA  
GAAAGGAGGTGAATTGAAGTGAGTAGAATGTTAAATATTGGTGGCGCCATACTCGGAATCA  
TAGTTTTGGCTGCCTTTTTCCCCGAAATGACCGCAGCTCTTCAAACGCTGATGACCGATGCCA  
ATATCGCCGATTACACTATGTTTCGAAACAGTCCTGGGTTGGACTCCGGTCTCTGCTCTGGGGC  
GGCGCTCTCGGTGTTGTAGGCTTCTTGATTGTCAAAGAAGTCAAAGCTTCCCGTGGTTCCGCC  
GGCCATTCTGGCCGCCGCTGCGCTAACTCACTTTGAGCACCTATGTTATTTGGGCAGAAAA  
AACGAGTACACGGAATCCTTCTTTAACAGAAGACAGCAGGTGTTTGCCATTACTCCTGCCC  
GTAGACGTAGGATGCGTCCGTGATGATAAGTTCGATGCAGGGATGGGCATTGCTATCCGATTG  
CTGCTTTCCTCAAAGAAAACCTCAAATTCCTTTGAGTTGGTATGCGAACGTGATGTAGTTCC  
CATCTCTGTATCAGGCGACACAGCTAAGCAACAGAAAAACGGTAAAGACATCGTCAATCAA  
ATAGGCAGAGAACGCCGTAACAAGCTCATTTTCATGCTGGATCCTGAACTTAAAAAGGATA  
GGGCAGCAGATATCATTCAAACCTTATCTATGGTGGAGGTGCCACTTTGGTTTTGATGATG  
ATTATCGGGTTGTTTTCGTCAGGGAGGTTAAAATGGCCATTCTAGGGAAAAGGGCCAGCACT  
GTCACAACCCGTACACTGGTAATAGACACCCGGTCTGGTTGGGATATCGAAAATATCGATT  
TGAAATCATAGGTCAATCATGGAAACGCTATTTATATGATGGCAAATGGCTGCCAGTGGTTA  
TTCGCGACTATGCAAATGATGGTTCCCTATTTATAAACCTCCGATATTGCCAGTAGGTATGG  
CAACACCTCCTGAAAACTCTACCGGGCACTTATAGCCTGGCCCCCTGTTGTTAAACGTTTCT  
GTAAATCCATGAGCGATATTTGGGGAACGCTAAAAAAAGGCGCCTTAATTGGTTTTCTGGCA  
GCTATCTTGGTGGCCCTGATTTTAGTTTTGGGGTTCTATGACTGGAGGATGAAATGGTGAAGA  
AAAATAACAATACAAAAGAAGCTATTGAAAATACGGTACCTCTTGAAGTCACAGGTATTAC  
TGAAAATCTACCGCCTGAAGGTAATTTGATGCGTCACCAGCTCCCTCTGGTGGTCTAACTCG

GGAAAACTCGAAGGCATGATGACCCAAACCAGTATGCCATCTATCGTGCGTGAAGTCTGCTG  
GAAGCTGGGGATGATCCAGAAAACTTTGGATGCGCACGATAATAATGAACAGTAAGAATG  
CGGAGGCTGAGAAAAACTCGACGCTGCTCTTTCGATTTATGCGTTGAATTTGAT  
GATAACAAGGTATGGATTATCTGAGACGCAAGCTTTCCGGCTGGGCATCAATTAACGGTGC  
GGCTCGGGAACAAGCTGTTGCTGCGGTTACCGGTGAACGTTTTAGGACGCCAAGCCTGGGC  
AAAACGGTAACAATCCACCCCCACAGGTAATAATGGTTGCTATTTGGGGTTTTATTG  
GCCCCGAAGGCGCTGGCAAACTACTGCCATGACCTACTTCATGGAATATCATATGGCACTA  
GGGGGTGTTTGCAGATCCTTTCCGGGCTATACCTTGATAGCCCTAAGGGCAAATTGGTAAA  
AGACATCGATCTTAAAGAGCTTATGTTGATGTCTGGGGAGCTTAAAAATGTTGTTGTGGGAA  
TTGACGAAATCAACAATTCAATGACTCGTCCCGTCATATGACCACTATCAACCAACTGACA  
GGCTATGTTGGCATGCAACGTCGCAAGCTTTCTCTCGGCATCTTTTATACCTTGCAGAACTGG  
ATGTGGCTGTATGACCGCATGCGTTGGTTAACTCATTTGTTAACAGTATGTTCTGATCTGCAC  
TTCTCTCCCTGGGGTAAGGAAAACCATATACGACAAGGGCAGTATATGTCTATCGTCACTTA  
CGATTGTAAAGGGTTTTTGACTGGCCAGCCATGGTCTCAATTATCTCCCATGGTATTACGTCC  
TCAAGAACTTTGGCCTTATTATCGCTCTTATAACGTATTGGATATTTTCGAAGGTCAAGAGCG  
TATCCAGATCAAAAAACGCCTGACCGTTTATGATCTTAATAAGGAGAACCCGACCTTCGAAC  
AAATTAGAGATGCGGCAGATCAAACACCTCCGGTTCGGATTAAAAAACACCACGAATGACTGA  
TGATGAAATGGCAGTATATCAGCGCTTGGCTGACCAAGGTGTTGATATGAGTACTATCCGCG  
AAGTTCAAAGAATGAAACAAGGAGTGAATTATGACACCTGAAACTGCTCAAATTATTGCC  
GATGCCATTAATTCAGTGGGAGCTGCTCTCGGGGCAGCTCTCGGTGACTCTATGAGCGAAAC  
AGTCAGCACAGCCATAAACCGGGGTTTTTAAGCTTGGCGGCTACGTTAGTAAATGTATTGG  
TCATGATAGCTGTGGTAGCTGCGGCCTTTATCAAACATGATGCTTGGCTCTATATCCTGGCAG  
GAATTTCCGTCACGCTGTATGCCTGGGGACAAATGGACAGTGGCATTGCTGGGAATACTATA  
TTGCAAAATTCTCCGTTAATTATGCTGGGTTTGTATCTAATCGTCTCGGCCGGAGTATATGCA  
TTCCAAAGTCTCCAGTCGAAGCATCAAGATGGAGGTTAAATTATGGGTATATTATTAGGTCC  
CAATCAGGGGTCTGTAAATGGGCTGCTTCGGAACGGCCCGCCTACACCCCCTAATAACCAGG  
TGGCCATTAATGCCGCCCCGGCAAGCAGCTGAATCAGGTGTTAATAATATTACCACAGTTAAG  
ATGCAGGATGGCAAATGGACAATTACCACTGACGGAGCTGTGTATAACATCGATACAACCG  
GTACAACAGAAGATACTGTGCAGTATATAACCAATTACCTGACCAGCCGCGGGGCGTCTGG  
ATCTGTTATCAAATCCGTTACAGAGCAGATTCCCATTATCACGACACGGGAATCTGGAAACG  
TCGTTAAGAAAAAAACCAGTGCAACTATCACAGATCCTAATGATACCACCAAGAAATACAC  
TGCTGAACCTGTAAATGAACCAGCAAATGATTCTACCGGTGAAGGTGATACTCAAATAACA  
CCGATGTTTCGGTCACAGTGGATAATTCTACGGCATGGACGTTTACTACCCCTAACGGCACA  
GTCTACACCGTGCCCATGGCGGGCTTAGCCTGGTCTGACCCCGCCAAGATGCATGAATATAT  
AACAACTACCTGAACAGTATCGGCGCGCCCGCAAATGTCATTATGGAAGCCGTCAGCCGT  
ATGCCCGATGTAATGGGGGATACTGGTTTAAGAGAACCCCGAAGTATGAGTTTGGTAACCT  
GATAGACAATACTCAAGAGATTAAGGATATTATCGCCGGCAGTGACCAATCTCTAGCTTCTA  
TAACTGCCTTAAAGGCATTCTTAGATGCCAAGGGATTTTTATCCCTCTCCCCGAAGAGCAG  
TTCAACAAGGCGATTGAATACGTTTTGATACCAACTGATTCTGTCTATGTGCCGCCTGATTCC  
GGTTATAACGTAGGTCAAACGCACCCGCCCGGAATGCCTGATGATGTAGCCGTATCTTTGGG  
GCTACTGCCATCTAAAGAACAGATTGCATATAACGCCCCCAATTTTACTGGGCGTACCTTA  
GAAAGGCAGATGCAGATCAGTACTTTGCCGAGCTAAAGGAAATCGTTGGCTATGACATTAC  
CTCGGCTAACCTCAAACAGGCTATGCGTGAGGCTCAGAAAATAACTACCAGGCAAATCTA  
CAAGCCAGCTCTGTAGCTATTACCTTGAACCTTTTTATGCGTGGAGAAGGAGATAATCAGAC  
TATTGATGTCTTCGCCGCCTATAAAGCAGGTATCCCGGATAATGTTATGGAAAAAGCTCTCG  
GATTATCCAAGGCTGATTCTATAGATATTAAGTACATGCTGAAATACGTTGATGATAAAGGC  
AATGTGGATATCCAGCAGGCTGTATCTGACGGCTGGGGGAAAGGTATCTTGCAGAAGTGTT

CGGGCTGTCCGATGCCGACTTTAAAAACGCTGAGTTTGCCTCTGATTACGCAGATGCAA  
ACTTCTTAGAGAAAATCGGCATGGCGTATAAAAAAGACCCGGGTGAATTCTTAAAAACGTAGG  
CCTTTCCATGATACCAGTAGTTGGAAGTCCACAATGTGGGAAGACAAGGGTAAAAAAGGA  
TTTGGTGCAGAAGATTTTACTTCTGGATGGAATTTACTAAGCATAGGGCTTGATGTTGCAAT  
ATTTATTCCATTTATAGGTGGAGTTTCAGCTTTAGCTAAGACTGGAATTGGAGCTGGACGAG  
CTATTGCCAAAGAAACGCTCATGACTACTCGAGGGCTTATTGTGGCACCTATTACAACCTGCT  
CTACATCCTATAGCTACCACTAAAGCCTTATTCTCACCTCTGGGGGTATTACTCAGTAAAGT  
AAGGTGCCATCGGCCACATTCTGGCGTGGCTCAGGCAGCCAGACCATGGATATAGCCAAGG  
TACTGGCTAACCCCTGCATCAGTAGAAACAACCAAAGCTATGGATGAAGCTATTATGCTGCGG  
AATGGGGGCAAAGCTTCCGGTTCCTGACCTATTCTGGTTGATGGTACTGAAATAGGTGCTAT  
CAAATGGTCAGATGCAGGCTTCCAGACAGTATTTAAAAATTCTGTGGGGCATTCCACACCGT  
TTGGAGAACCGTTTACCAAAGGTGTCATGGCTAAAGATGAAGGTTTATTCTTTCCCAAT  
ATGAACCTTGGGCTGACTTCCAGAACAGCTACAGGAGCAACGCCCGGGTATGTCTTTAACA  
ATAAACCCCTGGTTGGGCAGGTTGGGGAAAATGGCAGGCTGGTTGATAGCCATAATAATATC  
ATTGGACAGATTGCAGATAATTCAAAAGCCGTTTCCATAAATAATACCAAATTAGGTACGGT  
ATCGATTGAAAACAACAAAGCCTATCTGGTACGGCCTGATGGCACCCGGTATGAAGTCAA  
CTTCAGGCTGGAGGTGCTATAGTAGCTGAAGATAGGTTACTGGGTGAGTTTTACTCAGGGCA  
GCCGGTATATAAGAACGGCAAGAAAATCGGGACAATAGATGGCAGCGGGAAAATAAGAGA  
CCTGGATGGAAATATAATAGGTAAAGCCAGCCCAATGTTGTAGGCTTCTTACCACCAGGTA  
CTAAAGTCTATGGAGAGGGCAAGGTTGTAGTTGGGCAGATTAAGAAACACCGACGTTTGC  
CATCTTCTACAATTCAGGATTATCCCGCTTACCGGATGTTATTTTCAGATGCTAGGACTATGGA  
TGAAATGGCATCTAAGGCGTGGAGTTATATTAAGAGTGACAAATCCACAGGAGAAATATTC  
CCTGTATTCAAGCAATATGCCAAGTACATAGAAGACGAAGCGCTTATGACTCCAGGCAGCC  
GGGCTATACCTGTGCTGGATGATAAGGGTAAACCTGTAGTTTTAAATACTGTTCGGCCCGGAT  
GGTAAAAAATCAACGTTCCCTCTGCTGCAAATGGTTACTCCGGACTGGTTTGA AAAAAGTTT  
GGGAATTACCAAAGCACTGGCCGGCAAAGCGGACACTCTTAAACCCCGTCCACTCTCCCAG  
GTAATAGGCAAAGTAGAATCACTCCCCAGAGGAATGGATGAGGATTTTCATATCTTATATGCG  
CAAGAATCCTGATAATGTACTCTATGGCAGTACCGCTGAATATACTTTCACTGGTGGCAGAA  
AGCCCGGAGACTTAGATATTCAGTCTCCAACCCCGAAAAGACCGCCCATGATATTGCTGAT  
ATAGCCCGCCGCTATACTGCAAATGAGGTAAAAGTAACTAAAGTGGCCACCCACTATACAG  
TATCTCAGCTTAAAAATGGGTTGTGGAAAAATATCGCTGACATATCTGAATTAGGATGGAAG  
AACTCGATGCCGGGTTTTAAAAGGCTGAATGCACCTATCAATACAGTAAAGGTAGAAGGCA  
TTACGATGGAAGCGCCTAGTACTCAGCTTTATAGCCTACTAAACCGAACTGTATCCAACCTT  
GAAAAACAGGACCGTTTTACGGCTATGGTAAGCAAACCTGGGAGGCGAACTTGATTTGGGCA  
TTGGAGCCAAAGCCCCCTCTCTGGCAGATTTGTATAAACTAAAGGCCAAGGGCGTCTACAAT  
ACTGTCCGGGATATCTTTGTGCCAAATCTGAAAAGAAAATCAATTATGAAGCCTTGGCTAA  
GTCTAACCCGGAGCTGGCCGGTAAGATTGAAAAGGTCTTTGCCTCCGAAGCGGATACTCAA  
AAGCTTTACTGACTACGATACGGGAGAAATCCCCAAAATTGGCTGATAAACTGGAAGATTTG  
CTTGCTGAACGGAATATGTCAAATGCAGCCCGCTTGGAAAGCTGCCCGGCAAATAGCACCGG  
ATTTAATACCTGAAATAAAGGAGTTGCTGCGTGCTGAACAACGGTCTATGTCTGCCGCCCGT  
ATGGCCGCCATGACGGCCGGAAGGGATGGACGCGCCAGTGCCATAGTAATAGCCGGCAGAC  
TGGCAAAAGTGGCGGCAATGGAGAAAGCCCGCCTTGAAGAGGAGATAAACCGCCGTGCCAA  
GCTGATAGAAAAAGAACTACGTAAATTACCGGCACGTATGCCGGGTGTTGGTAATATGAGC  
AAAACCAGAATTACCGCTACAACACTGGAACGGAAACTGCGCACCGGTGGGGGCGATTATG  
CCAGCCTGCGCAGCCGGATACCGCCATCCAGAGGGGAAAGAGTACCGCCCGCCGAGAGTTCC  
TACCCTTAATCCGCCGGATAATCCGTTACCCAGAGCTGAACCATCCCGTATTAAGCCGCCAG  
ATTTAACTACAAACGGGAGAATAGACGAGACGAGAGTAACGAAGAAGTGTCTCTGACCG

CCCCAGATTAAAAAATGGGGATGTAGCCTGGAAACAAGGCGAACTGGGTACTGGTGATGAT  
AAACGCCCTGTTTGGATAATAAAACGTGCCAATGGCACTCATGAATATGTTTTCCAGCCACC  
GGAAGGGGCAACCCGATTGGAAGGCACACCTAAGGAAACATTCTTTACGCGGGGTAAAAAA  
CCGCCTACCAATCTGACCCAGCAAATGGGAGTTACTACAGCTAAGATAAATTTGAAGGATA  
ATCCGGAGATAAGGTTTGTCCAGACTAAAGCGCCTAAATTTAAACCATACATCCCAAAGAGT  
GTCCGGCGGTCTATAGGCATGTGACAAAGTGCACAAATATTCCCAGATATGCGAAAGGCC  
GAGTGTTTTACTCGGCCTCTTAGGTTCTATTATTCTTACCTCTTAGCATTTTAAAACCTCCCTG  
ACTCTTTAGGCACGACTGAAAATAGCATGCTTATATCTGATTGGGCAATTAATAACCTTCT  
CTAAAGACATTGGCACATGTTCCATTTCTTTCATTGTCAATTTCTGGCATTTCCTCCGTCTCTGA  
TACAAATATATAAGCCCTCTATATATTCTTGGTTGCATTAGCTTCTAGCCATGCTCTAGGGT  
TTTTAGCAAACCCCTTCTCTAATATCTCTCCTACACCTATCGTCCAAAGCATAGACTCTAGCA  
GCTCTTTTCTTACTTTATCTTCTGGCTGGTAATAAACAGTAAATCCTCTTCCTATATCCAGTGC  
CATATTCTTACTCCTATTTGTATTCTTATATCTCTATATTGTAGTATGTCAAGGACAAGTTA  
TTGATAACAGAGACAATGTGCTAACATTCCCTTAATATGAAATTAAGAATTAAGACGA  
AATAAATTCCTGTCTCAAGCCGATTTAGCAAATTAGCAGGAATGACAAAAGAACTATTG  
GCAGGCTTGAAGCTGGTAAACATAAACCAAAATTTTCGTAACCGTGCGCAAACCTTGCCACGGCT  
CTTGATGTAACAGAGGATATTGAATTCTGATGAAGTTTGAGTGGGATACAAGAACCAG  
AACTTGGGTTCGGATACTTCTTTATCATATTAGCAGTTATAATTCCCACTTTTGGACCCGGATG  
GAATAATGATTCATGGATGGCGGTGCTAATCCTAGCCTCACCCGGTATTGCTCTTATCAT  
ATAATCTTATTCGCTATGGCCAGCTCCGGGACTATTACTGGCTATGGTGCATGGAAACAGAT  
GAATTCTTCGGCCCTTCAACAATGACGTTGAAATGAAGCTTTTTTCAGCCACCTCATTATCTT  
CCTGGTGGATGGCAAATCTTCTGGATAACCAGCCAAAGACCCTCTTAAAGCTACTAAAATCAT  
TCATAAGTGGGTGAGAGACGCTGAAAAAGTCTCCGTAACGACCCAGAATATAAAGACAGA  
ATGCCGAAGTAATACTTTTAAAGATATTTAGGATAGGATGAAACAAATGGCAAGAGTAAAA  
TGGAGTGGGTTTATTCACAAGCAAAGCACCCCTAAACGGTACGAGTAAGCTTGTAAACAAGGA  
AATTTAAGGTTTGTCCGGTATGTTTAAAGTACCTATTTTGAAGCATCATATCAACCTGGTTTTT  
ATCCACTGGCTAGATATTATTGCAAAAAACATCGAGGATTCTTTTTTATGCCCAAGACGCAA  
ACAGAAATTATCCGAAAATAATAAGGAGATCAAATTTATGTTAGACCCACAAGTACAAATT  
GAACTACTTAAGCGAACATGGGACTTAGCAGGTATTGAAGCCAACCAATACGAAGATATAT  
CTGTTCCGAGAAAAAGATTTATAGATGTATTCGATAAACTTACACCCTTTGGCTACCATT  
TTAAATAAACCATTAATTCCTAATAATAGAATTAAGTTTTATTTGGTCTGCGGAATAAATTA  
GGCCGGATTAAAAATCCGGCCTTTAGTATATCTGAAGTCTTTATTTAGTTACCATACCTATCA  
ATAAGCTCTAACAACCCATCCCTACCAATACCCTTCAACTCCAGCTATAGCTGCAAATTTATCT  
ACCGGGCTTGCTTGCCTGGTGGACTCTCATCATATCTTCTGTACCCAAAGTAGAAGTATAACG  
CCTGGTCATAGCAAGAGTAGTATGCCCAACATGATTTGCAGGGTAAACTCATCCCCACCAT  
TACGTAGATAGTTTATAGCTGCCGTATGCCTGAAAGTATGAGGTCCTGGCTTAGCATCAGTG  
ATATTAGCCCTCTTACAAAGCTTTTTTATGGCTTCTGAACACCACGACAAGTAAGTGGTTCG  
ACGTTCTTCTGTAAACCATAAACATTGATAATCATCATCCCTATTAAGCATATACTTTAACAA  
GGCTTTTTGGGTCTGTTTGCCTATTCGAACAATCCGTTCTTTTGACCCTTTCCCAAATACACG  
AACAGTTTCTTGATTAATAATCGATGTCATTAATATTAATGCCGGAAATTTCTGCTAATCGTAA  
CCCTGTATCCATAAACAATAAATTTAAAGCACGATTGCGTAATCCTAAAAAACTTGTTTTAG  
CATTAAACCCCAATAATTTTTTTATGTCCCAATTGAGAAGGGCTGGATTACTTTCTTATCTA  
GCCTCGGAGGTTTTAATGTGCGCATTGGATCGTTTGCAATATAAGCCTCTCTCATTAAACCAAT  
GTATAAAGGCTTGGAGTGCACGATAATATGCATTCACAGTGTATTCCCGCACCCCTTTTTCTT  
GCAAGGATAACAGGAATGCCCGTATTAATTGAGGAGATATTTCAAGAGGCTAACTGGAGACT  
GAAGCGATGACAAAACGACACAAAACAGTTAACACGCCGACGGTAAGTATCAACTGTTTTT  
GGAGATTTACTCTACTTTACATGAAATTAAGTAAACTCGAGGAGCCTTTTTAATTCATTT

GATGCAGGACTGTGCTCTATGGCACGAATGAGCTCATCGTAATTAATGTTGTCAGGACTGTG  
CTCTTTCAATTCATTTTCGGCACGGGAAGGCTGTTTTGACTGTTTTAGCTTTATGGTGGG  
CCATCTTGGTCTCGAACCAAGGACCTCAGTCTTATCAGGACTG

>Dmc\_IME1-6

ACAACATGGTGGGCCATCTTGGTCTCGAACCAAGGACCTCAGTCTTATCAGTTCAGCCTTT  
AAAACCAGTAAATCCTCTTTTAGCCGCCTCCTTTAGTGTTTTCAATCTTTTGGTTACTTCAATTA  
TGACAGCAATAGCCTGGCATTCTTTAACAGAGTGAGTGCCTTGCCCATTTTTTCAGGATACATT  
CGCCGTTTTGCTCTATAATTTTTGCCACTCGGAGTTCGTCGTCGATAAGACACAGTACAATGT  
CCCCACCTCAGGAACCATATCCCTGTCTACAACAACAATATCACCATTCTCAATCTTGGGCT  
CCATACACTTACCCTTAACGATATATGATTCTATATTATGCCGTGGTGCCTCACGTACACGTG  
TCCGGTAAATGTATTCAACTGGAGCAAACCCACTATCCCCTGCGTGCGCCCTAAATTCAGTA  
TAAACAGGTATGCTCATGGGAGTAGCCAGCCGTAACCGTTCTAGTATCTCTTCAGGACTCTC  
TGGGCGTGATAATGGTATTGTGGAAGTTGGATTGTGAATACCCATAGATCTATATAAGTCAT  
CCACATTTATGTTAAATGCCGACGCAAGTTTTACTAACTTATCCACCCCTGGAGTAATTCTCC  
TACTAGATTCTAAGGCTTGTATAAGTGACCTTGAAAGACCTGCTTTATTTGCAAGCTGCTGTT  
GAGACCAATTCTTCGCATCTCTTAGACTACGTATTTTATCCGATAGTTGATTGATTCATTCA  
TGTTCAATTTGCCACTATTTTAGCAGGATTTAAGCAAAAATAAGAGCCTCAGCGAGATATTTT  
ATAATAAAGTGGCTCTCTTTATTATCCATTGGCTACTATATTATCTATTTGCAGTTGTGTTTT  
TGTAGCCCTCGGCTACTATTTTATCCATGAACACATTACTCGAGCAATTGATTACTGAACAA  
ACTACTCGTCAAATGAGCGATTATCAATTTGTTAAATTTTTAAATTTCCATAGCAACGCTCAT  
GTATCTCGACAACCTTTGGCATCAAACGCGGAATAAGCACATACCTTTAGGTTTTAAAATCCT  
AAAAGCGACAGTGCAAACATTTCCGGAGCTTGAGACTGCCGCCATCGATTATCTCAAGAAA  
AATACTAATCATGAGTAAATCTGATTGTGGTAACGCTACCTTGTGAAATACGGTCTTGAGT  
ATTATCAAGCAATTGGCCGATTGGGCGGCAGACCAAAAATTAAGCTATCCGATGAAATACA  
AACGCGTACAGCCTCCTTATCTGTATTGGTGAAAGGAGAACGGCACGGGGAAGGCCAATCT  
CTTATGGCACTTAAGAGGCTGTACGCAGAAAGGGGAATGAGGCAATGCCTCAACAACAAGT  
GACTTATCGTATCAAGAATGAACGCACCGGTCAATGGTGGGAGGGAAAAGCTGATAGCCCG  
ATAGATGCCATGCGGAAAGCCTCCCTCGAATACCCGGTAAAAGCCCTAGTACCGGCTGGA  
CAGCTGAAAACCTGCTGGGTACGTCAATGGTGTCTGCTGGTTATGGCTCATGGGTAACCCAG  
ACTATGTCCGCAAAAACAACAGAGATGGTGAAAGCATGAAATTCTTTCCACGTGCTTACCGC  
GTAGCTAAAAAAGAACAGGAGAAATAATATGCCTTATAAAAAGATATTTCCCGGCCAAGATA  
GTAAGTTTTGACCCTTATTTTGGAAATGGAACGTGATGGTCTTAAGTCATTTATTATCGTCACA  
GCATTTTCTATGGATGCACCGGGCAATCTATTGTTGGATGAATTTCAGAAGTCAGAAGTCCC  
TATACTGATAACAATCCATAATCCCCAAACCTGTCAATCATTTAATGCCTACGCAACCAAAG  
TTGTGCAAAATTCTCCCGCCCGTTACTGGAATACCATCCATATCGACACAGACCGCATAACGA  
AGAGCAGAAGAAGCGCAAACAGCTATGGCAGGCTACCCCAAAAAGGATGACCTTAATGACT  
AGTGGAAATGGTTATCTTGGCTGAAATACGTACCGAAACCCAGCAAGGCCGTCCCGCCCTAC  
CACGGGCTGGGAATGGACTGCCGGTGATACTCCAAAAACAGACCCTAGCCCAGGTACCTGG  
TTTTGTGCGGCGCATGGAAGACCGTTTTCGTTGTGTTTTTCCGCTCTAAACTGACACCTGAACTA  
AAGGGCAAAGGACCTGAATTTCCAATCCTGACTTTTCCGCCTACTGAGGCAGGGGAATATGT  
AGCCCGTGAAATGGCAATCAAACCTACGTAATGAATCATACCGACAGGAGGCTGAACGCAAT  
GGTCGTAGCTACTTCGTCTAAACCGATTGAATTGTCACCCCGCCGCTACCGCAAAGGGAATT  
ATATGTTTTGCCAGTAAAAGCCGACCGCAATTACAAATGCCCGGAGTGTGGTTGTCTGGTA  
CAGCCAGGGGAAGTTGGATTTACCCGCTTTAAGATTATTCATGATCTGGTAACTGAGCCTGT  
CTGGGATGTACTGCATGCGTGCTGCGTGGAGGCAAGGGAATGATAAGAATTAATAATTGGTC  
ATCTAACGCTCTCTGCGGACCTATCTCAATCCGGAGATGTAATTATTACCTTGAGGACTGAA

GATGGCACACCTGTTGCTGCCGCCAACTCAAAGACACTTATTGCCGCTATTGAGGCACTGGA  
GAAGACAGCGGAATAACATCCAGGACGGACAGGGGAGTGTGATCTCCCTCCCACTTCCCTG  
TCCGTCTTAAAAACACAAAGGAGTGACATATGGTCGTATCAACACTGAGTAAGAGACCA  
ATTCTGCAAACCTACCCTTGTACCCACTGCGGCCGGGAGACCGAATGGGATTTTGACCTGGG  
CTCCAATCCACTATGCGCATACTGTTGGGACAACAGTATAGAAATAACCGTCAAGGTTGAGC  
TGGCTGATAAGATGCGTGCCTACCGCCAGGAGCATAAAGTTGAGCTGGCTGATAAGATGCG  
TGCCTACTACCAGGAGCATAAAGTTGAGCTGGCTGATAAGATGCGTGCCTACTACCAGGAGC  
ATAAGGTTGAGCTGGCTGATAAGAAGCGTGCCCGTTTCGGCTATTTCCAATTAAGTAGTCTGA  
AATGAGGTCCAATATGGTAATAGCAATACGAAAATATACGATAGACGATATCCTTGCCCCGA  
CTTCAGGGCGTCAAAAAGAATGGATCCGGCTACATGGCCTGCTGTCCTGCCCATGAGGATAA  
AAACCCGAGCTTGTCCATCAGTGAAAAGGACGACAAGGTGTTACTAAAGTGCTTCGCCGGG  
TGCAGTTATGAACAAATCATGACCGCGTTAAATATGCCAATAAATGCCGCAGCACAGGATA  
CTACAGCCACCTCTTCAAAAAACCAAAAGAGAGCACCAAACGGGAAATAAAGCAGACTTA  
CGACTACACAGACAGAAGCGGACAGCTGATATTCCAGGTAGTCAGGTTTGAGCCAAAAGT  
TTCTCCCAGCGACACCCTGGCGGCAAGACCGGCTGGGTCTGGAATATGAAGGATATCGAGC  
CGGTTATCTATCATCTGCCAGACGTGCTGGAAGCGGTAACAAACAGGCCAGACTATTTGGATA  
ACCGAGGGCGAGAAGGATGCTGATAACGCCAGGGCTATGGGCTTGGTGGCCACTACCTCCC  
CGATGGGGGCCGGCAAGTGGCGCGATAATTATACTAATGACTTATTGGGAGCCTCGCAAGT  
AGTAGTTATTGCCGATAAAGACGCTCCGGGCCGTAAACATGCCTCCGATATTGCCATGTCCT  
GCCGGCGGCAACGGATACCGGTCAAGATTATCGAGGTACCCGGCGACGCCAAAGATTTTAC  
CGAGTGGTTGGAAGCCGGCGGCCAGACATCCGAATTGGATGATCTGGTAGCTACAGCTAAG  
AGCTATACGCCATCAAAAAACCAGAGCTTATACTTTCTGTCTGATGGCAAGTTTTCTATCGA  
AGCCGGCCGGATTATTTATCATTACATACAGGGATAATGTCCCCTACGATGCTCCGCTGTGCA  
ATTTCTGTTGCTGCCGTTAAAGAGGAGATCATCAAAGACAATGGCATAAACCCGAAAACCTTC  
TTCAGGATTGGCGGTACAGACTGTACTGGCCGTCGGTTTCCAGATATAGAAGTCCCGTCCGA  
AACTTTTCATCCATGTCCTGGGCATTATCCCAGTGGGGAATTAAGGCTATGATCGAACCCA  
GCCCTTCAGCTGAACGGCTATTACGCGGGGCAATGCAGTACATGTCGATGGAGGCACCCTGC  
CGGATTATTTATGAAAATACCGGCTGGACTAATATCAACGGCAAGGATGTTTACCTTACTCC  
CCACGGCGCAATCGGAGCCGATAATGTTGAAGTGGAATGCCATCCAATATCAGCCATTATG  
ATATACCCTCGCCGAACAGAATGACGATGTGAAGTCCTTCATTGAGGCCAGCTTTAATTTCT  
CTCAAAGTAGCCAAGTTATATATTACCTTGCCGCTGTTTGGCGCTATGTACATGACGCCTTTG  
TCAGACGCCATTGATACCAACTTCAACCTCTGGCTGATTGCCGGTTCTGGCAGCCTTAAAC  
CACGATAGCATCACTGGCACTCTGCCACTACGGAAATTTGATTATACCTGTGTGCCGGCTG  
CCTGGCGGGATACTCAGAATACTGGAACGCATCCTGTTACCTGCAAGGATATGCCGGTG  
CTGGTAGATGACTGGTCAACCGGCCAGACCACCGCCTCACAAAAGAATTTGACGCTAAGG  
CTGACTATGTATGCCGCGGACAGGCTAACAGACAAGGCCGTAAGCGCATGTCTGCCGATAC  
ATCTATGAGGCAGGAATATGTACCCAGAGGCTTCCTGATATCCACCTCGGAAGGACAACCGC  
CAGGCGAGAGCAATAATGCCCGTTTTCTGATCATTGAAATGTCAAAAACAGATATCGAATTC  
CCTGTCTTACCCTATCACAGAAAGAGGACCATCTGTACCGCCGCGCTATGGCTCATTACCT  
GGCATGGCTGCAAGCGGACTGGCCGGCGAAGAAAGTGTATCTGCGCCAGCGCTACCAAGAG  
GTTTTTGAACAATTTACTGAGAGTCTCCGGGGTGAAAATGTGCATCTCCGGCTACCCAGATC  
CATCGCTCTGTTATATATCGGTCTGGAAATGGCTATTCGCTGGGCCGAAGAAAACGGAGCAG  
CGGATATATTTGATAGGTTTATAGATGAAAGCGGAAACGGGGAGAATGATTCAGTCGGGTC  
TGCGTATCTCTTAAAACAAGCCCGCGAAGTATTTATTGAGATGGCCAAGCGACAGGGTGCC  
GGATAGATGAGGCTACACCATCGAAAAAGTTTTGTAAACGCCTTAAATGCAGCCCTTATAGCT  
GGTACTGCATATCTGGATGTTAAAGATGGGGCAAATCCTCGGTCTGCTTACCTGGGCAAAC  
TCTGATCGGTTGGGATGACCGGACTAACGGGCACGTTTCCCTCCATAATGACCTGGCCTACC



AAGTAGCCAACCAGCATTACCAAAAAATCAATGAGGCTTTTGTAAAAAAGGATGCTGTATTT  
ATGGATCTGGTGAAGCGTGGTTATGTGGATCCGGGTAAAGATGGTAAAACCACTGTCTTTGA  
GTATATCCCGGTAATAGCAAAGGCATGCCGTGTCCTACATATCAAACGTGAATTCCTGGGGC  
GGGATGAACAAAAGAGAGGTGAGTAAAACAATGAAAAAATGTGTGTCGCCCCAAAAATAT  
CCCATGTATTAAAAAATGGTGCAAGAAGTGCAAGAAAACCTGTTTTTAATCGTAAGCCAAA  
ATATTCTGAACGTGAAATTTCTTGCACCTTGAGGGTGCAAGAGGGTGCAAGAAGTGCAATAC  
AGGTGCAATACAGGTGCAAGAGAAGTGCAAGAAAATATAAAGCTAAATTA AAAATAGGTGC  
AAGAGAAGTGCAAGAAAATATTAAGCTAAATTA AAAATACATACTCGTAATTGTCAATAT  
TTCTTGCACCTCAAAACAAATATATATCACTCAGTTTTAGGGTGACACATAAATCGGTATGT  
AAGATTGTTAAATCATTCTCAAAGGATGTGACATAAATGAAAGTCGCGTTATATGCCAGGGT  
AAGCACCCGCGATAAAAATCAGGATCCGGAAGTCCAACCTGATGGAGCTGCGGAAATATTGC  
CAGGAAAACGGCATGGAAATAACCAGGGAATATATAGATCATGCCTCGGCCAATGATTTCCG  
TCCGCAGGACGGCATGGAAACAGTTGTTAGTGGATGCATCTGCCCCGAAAGTTTCGGGGGTTA  
CTGGTGTGGAACTTGACCGGGCATTCCGCGACATTACGGTGGCCACCTCGTCCGTTAAAAT  
GCTGCGCAATGCCGGCATAGATTTTTATTGTTACCACTGTCCCTGTTCTTTTCAGTCCAAGGTCC  
AGCTGGAGACCTGATGTTTAAACATCTATGCCGCTTTTGCCAGTTTGAAAAGGACACCATTA  
TTGAAAGAGTTAATGCCGGACTTCAAGGGCAAAGGCTAAGGGTAAGGCATTCGGTTCGCCC  
AAGAAAGGCAATAGACTTCAATAAGGTTTTGGAAGCCACGAGATAGCCTGCTCACGGGTT  
AACCGGATTACTAAAGAAAATCAGGGTTATTCCGAGACGGCGAGGATATTGAGCGAGCAGA  
CCGGGCTAAGAATTACAGCCGGTTGGGTCTATAACCGGCTTAAGGCCGGCAATTA AAAATGCT  
TCAAAAACCCACCCCATTTTTGTCATAAATTTAAAGCCAAAATCTTATCGGATGGGAGG  
CTTCAAAAATAAATGTTTTTTGAAGATGTTGAGCTACTAACTTGATACCCATTATTCAAAG  
AAAGTCCAATTTGAAAGGAATGGCAAATAAATGAGACATCTTAAGGCGGTATGGCAAGGCG  
GTTTATTTATTGAAGGATTACGTCCGAAAAATAGATTACACGAAAGCCCCGGAACACATCAT  
TTAATAGTCACAAAGGCGAGCCCCCAATTTGATGACCAGAACCTTATCGGTAAAAGAGTAG  
CAATCCCAGTTTGTGGACCTATGTATTGGGAAGTTATGGAATAAGCGCAAAAAAACGGCAA  
AAATAATGCCCTGCTTAGTGGTTTATTTCAAAGGTAATTGTGCTAAACCGTAAGACCCCAA  
AATTCACAATTGTAAAAACACTGTCCTATCTGACTAAAAATATACTAAGGGAAAGGAAAC  
GAGATGAAAACCGTATTA ACTAAAATCAAGGGCATCACCCATTATTAATGCACAGATTCCC  
GATGGCGGGCGCAGACGATACATAAAACGACGTACTGGTGTACCGGATTGGAAGGCAGAG  
GCAGAACTAGCGTTATACAAAGATGATCATGGCCAAATCTATCAGCCAGCGAGCCATATTG  
AAGCTTCGCTTAAAGAGGCCAGTAAAACACTAAAAATACCAGGCAAACGAGGGGCGACCTA  
TTCAA AACTCATTGGTTCCGCTGTCTCTGTTTCCCCTGATGCTATCACTCATTTAATACAGAA  
TTACGAAACAGATAGCCGTCTGTGTGATACAGAAAGCACGGATAGTACGCTACAGGCCA  
ATATTTAAGGAGTGGGAATTGGAATTTGAAATCAATATTGGAGATGAACAAATCCCTATAGA  
GGTTATCAAACAGGCTCTCGATCATGCAGGGCTATATGTAGGTATAGGCGATTTTCGCCCAG  
GACGTGGAGGAAAATTCGGCAAATTCATGGTTGTCAGATTTGAAGAGAAATAATATAGTCC  
GTAGCCCTGCGGGTTAGTCAGGTGAGGTATGGCTCGGCTTGGTTGGGCGTGGTATGGTCAGG  
TACGGTTAGGCACGGTATGGCAGGGTAAGGTTTTTAAAAATTACACGAGAGGAAATACTCA  
AATCTGATCTTGAATCGGGAGTTAAAGAAA ACTTCTTACAGCTGTTGGGAATAAACACAAAC  
AAAGAGTAATTAGGAGAGGGCGAAATGGTTACTGAAACGAAAGGGATATACGAATTCAGCC  
TGGCTGTAGATGCCATGACCTTGGGCCAGCTGGGCCAGGAACTGGATAAATGCAGCCAAGA  
ACTGGGGGGCTGTGAATATTGCTCACAAACAGGCTATCTGTTTTGGATCTATGGCTGCACCTGG  
CAGATACGGTAAAGGATGATTGTGCGTTAACTGCCCGGCAGTACACTGTATATGCTCTAGAT  
TTTTAAAAATATTAAGGCCCGACGGCAGATGATCCTGCCGTTGCTTATCGCCTAAGCGCCGAA  
TAAAGACCCCGACAGTACCCGCACTAATAGGGAACAGGAAAAACCATTTAACAAGTCCGG  
CTGTACCTTCAAGGAATGAGTAATTCAGAATAGTAAGCGTGGTATCGCATAACGTAATAAAC

CCATAAATACCACCTACCACATTAACAACCGTAACGAACAAATTACCGATGGCACTATCTGA  
ATACTGCATAACCGAAAACCCAAGCAGGGCATTGAAAAATGACTGTTCTGGGTCTCCAAGC  
CAAGTCCCCTCAAATATCAGGCACATTACTTGACCTATGATATAGCTATAAACAATCCATAC  
CAGCCATTGCGGTCTCATTAGTAACTCGCCAACCTTCGATTTGTCATTTACCCGATAATCACC  
ACTGCAACAGGTACCAATACCCACCATGGCACACCTATAGTCGCGCACCAGAAGACTTGCC  
AAATGAGCCCTGCAACTGCACAGGGTAGTAATTTACGCGTTAAACCAAATGATAGGATAGT  
AATTATGGCCCCGCCGCCAAAAGCTAGGCTAAGCCAGAGAAATGCAGATGGGAAATTCATC  
TCTTCCAGAAAATCTGTAATCTGCTGGCCACCGGGCAGGTTTTCCGGATGCAGATTGACATA  
CCACCCGGTTCGGCATAAGTACCCAGATCATCGTCTGTCACAATCTCAACCGCATCTTCGTCATC  
TCCCACAATGAAGGCTGACTGGTTGCAGGCAGCATAATTAATCACGGCCACGCTCACATCTG  
CGTCAGTGGTTGTTATCCGGAATGAGGGCGTGGCATCATTACTATTCCCGGATAGATCCGTA  
AATGTAGTGGCGTATTGCCATTCCCACGAGCCTTTTAATACCCACCAACCGTTATTTTTGCA  
TAGTATAAATACGGCATTGATCCGTTCTGGGTAAAGTACCAGTCATTGACATTATCAATTAT  
AGAGCCAGCATAAGCGGCTGAGCCCTCTAAGAGACCATCTATATAGATATTCATCGTGCCTG  
CAGATAAAGATATCTTATATACATGTTCTGAACTGGATATATCCGCCGCCGTAACGATTGTA  
TTATTTGCATTTCTGTTATTGATATATTTATGTCTGTTGTAGCAGTGGCACTCCAAGTACG  
CTGAATTATTTGATGTCAGTATCTGCCGTTAGCATAACGGATTAGTAGGGTTATAACCAGTGA  
GTTAATTTATTACTGGAGTCCCCGTTTGGGAGTGACAAGACTATTGCATAACGTGTTCCGGC  
AGTTAGATTAATTATATTGGAAAAATCAAATGTATGATTTACAGCAGAAGTTGAGATAGTTG  
AAGCTACCACCGAACCGCTAACCAAGGCACTTCCTGTTGGCACATCGCCGCTAGTTGCATAG  
ATGGCATAATTAATAATTTCCAGTTGGATTGCCTACTCGTTGTGTTCTAAAGGTAAATTGGTTG  
ACAGCCACATCATTAGAAAATTGAAAGGTCTGTGCTATCCAGTTAGCACCGTACATAGATGT  
AGCTGAATATGCAGTACCATTATATGGAGTTTCTGTATAACTTGATGAATTACCTGCCGATA  
CATCTGTTCCAGACGTATAAATCCAGAATGCTCCAAATTTAGATAGGTTATAGCCATCATTAA  
AATCTACCACTTAACTCAATCTCAAATCATTTCGAAGCTCAAGTGTTCGGAATCAACAAC  
GTCATACCGGCTGTGCCCGGAAATAGGCCAGTTTGCCCCCATGGCAGTTTCGCCGCCGG  
TATAGAGGTTGTAGTTAATAGCGGAGTTCTGGCTGATCTGCTCAACCCACATCATCCAGGGG  
TTGCTGCCATAACCTGGCATAAAGGGTATATCCAACCCGCCGGAGTCTCTAAGTGCCAGATT  
AGAAAAGTCCGGATCTATATAATAACCATCCAGCAGGCTCTGGGAAGACCAGATAAATGGC  
ACAGATACCTGCTGGGCGGTATAGCTGGCATTGTGGCCCGGATATCCGCCATATAGATAGC  
ATCCGTAATAGTTGAGGCCATGATCGGTACAGCCCCTGTAATGGCCACCAGGATAAAAAGGA  
ATAACAGATACCAATAATTTCTTCATGCGTGCCTTCCCATAAAGACATAACCGGTGTA  
GCGTAAATAATGGTAATAATCGCTAGGATAACCCCGTTAAATAATCCCATGGCCGTACCACC  
GGCCAAGATATAGGAACCGGCTATCATAGCCGATTGATTATCCGAGTATTTAAATTGTGACC  
AGCCAAATAAACTACTACTAGAATCAGACAAAGCAAACCTGGTAAGTATCTGCCAGCTGAC  
AGCGTTATTAATATATCAGCCAAACCTGTTAGGGCATCACCCACCACAGTGCCATTCCATT  
GTTCTGCCAGGTAGTAAGCATATCAGTGCCCCATGTCTTCTAGTAAGGTCTAACCCCTTG  
CTTGGGTGGAATATATCTTGGGGCACATAGTCTGTAATCCGGGGATGGTTCCATTACCATAA  
GCAGCTCCGTAGTCATTAAATACCGTCCCCTGGTTGGTTTCGGTCAGTAATTTAACTGACCAG  
TTGATCTCTAGAGTCCGGCAGACTTCTATAATCCAATTACCCATCAGGGATTGATTTCTTTC  
TTAGTAGATAATTGGCTGTAATCGGAGCCAGTCATAGTGTAGTTAACTTCCGGAGGCGTCAC  
CCAATACTGAGGGTTCCCCACCATTTTGTAGTACCAGAGCATCCTCCCAAGTGGGAGCATCAG  
CAACTGCAAAATAGAAGGCTGAATACCCCATGTCATAACCGGCGTTGTTATAGGCATAAGG  
CTCAACCGCTCCCAGCTGGGTAACGCCATCTGTATCCATAAGGCGAAAATGAAAGAGCTTGT  
TGGCTGGAGTAGTTGGCTGCCCTGATGAATAGGCAATAGTGTACTTGAATGCTATCAGGGTA  
TCACCCGTCTCAACAATGTTATGGACCGCTTGAACATCATCCAGGGTATAAGTAGTTGGAGT  
AGCAGGGTCAACAGCCAATACCGGAGCAGCAGTAAATAGCGATAGTATTATGGCTATTACT

GTTGCGAGGGCTGTTCCGGCTAAAGACCTTCGTATATCTTCTGCGCATCTCTTTATCACCATGA  
ACGACAGGGGGTCACGGGGAAGGCATCGACCACGCCTCCAGTTAAGCAATGTATTCCTGTG  
TACCCAGCAGGTTTTGCAAGTGCACTGGTACTGCGATGCCAGTGCGAAAGGATAAGTTCTA  
TATCATCTCTAAAGCCTGAGATATCTCCATAGCTACACCTACCACTGTTAGCCTGATCGGTT  
TTACCCTTTCCTGTGTTATCTCCATGCTCTAAGTCTACCGACCTCTCAAATTAAGTAAAGGCA  
ATTCAGGTGTTTAAGGTATTTATATTAATTATTCATATACCCTCAGTGATTTTCGCACAATACG  
TTGTGCGAATTGGGAATTTAACTGGTTTATTATTCATCTCAAAGCCAAGTTTGACTGAAAGG  
AGGTGAATAATTTGAAAGTATTTGGTGCCTTGCAGGCTATATTTGGAGTCATCCTCCTGTTTA  
ACTTCATGCCAAATCTGACTAACTCTACCCATGATCTACAAACGGATGCGGCTACCCAAGCT  
TTTCTGCCGTGACTACTGGAGCCGGTGAGACAGCTGCTGATGTAGTACTAACTACAGATCC  
TTACCAGGACCGCACTACATCAATAACCGGTATTATATCGGACAATGTATTGGATGTTAACC  
CACTGGTTGCCGCCACTTATACCACCGCTACCAATACCCTACATGTCACGGGTCTGGTAGCT  
AGTCAATCACGAACTCTGACCATCGCTTATGAGACTGACGCCCTATCGGACTTTACCATGAT  
GGGCACAATCGTTGGTTGGACACCGGTTTTGATTGTAATAGCCGTTTTAGCAGTTATTGGCG  
GCACAATCATGGCTCTGATTCCTCGGAGAGCATAATCTCAACATTTTAAACAAATTAGTAAA  
GAAAGGAGGTGAATTGAAGTGAGTAGAATGTTAAATATTGGTGGCGCCATACTCGGAATCA  
TAGTTTTGGCTGCCTTTTTCCCGAAATGACCGCAGCTCTTCAAACGCTGATGACCGATGCCA  
ATATCGCCGATTACACTATGTTGAAACAGTCCTGGGTTGGACTCCGGTCTGCTCTGGGGC  
GGCGCTCTCGGTGTTGTAGGCTTCTTGATTGTCAAAGAAGTCAAAGCTTCCCGTGGTTCCGCC  
GGCCATTCTGGCCGCCGCTGCGCTAACTCACTTTGAGCACCTATGTTATTTGGGCAGAAAA  
AACGAGTACACGGAATCCTTCTTTAACAGAAGACAGCAGGTGTTTGCCATTACTCCTGCCC  
GTAGACGTAGGATGCGTCCGTGATGATAAGTGCATGCAGGGATGGGCATTGCTATCCGATTG  
CTGCTTTCCTCAAAGAAAACCTCAAATTCCTTTGAGTTGGTATGCGAACGTGATGTAGTTC  
CATCTCTGTATCAGGCGACACAGCTAAGCAACAGAAAAACGGTAAAGACATCGTCAATCAA  
ATAGGCAGAGAACGCCGTAACAAGCTCATTTTCATGCTGGATCCTGAACTTAAAAAGGATA  
GGGCAGCAGATATCATTCAAACCTTATCTATGGTGGAGGTGCCACTTTGGTTTTGATGATG  
ATTATCGGGTTGTTTTCGTCAGGGAGGTTAAAATGGCCATTCTAGGGAAAAGGGCCAGCACT  
GTCACAACCCGTACACTGGTAATAGACACCCGGTCTGGTTGGGATATCGAAAATATCGATTC  
TGAAATCATAGGTCAATCATGGAACGCTATTTATATGATGGCAAATGGCTGCCAGTGGTTA  
TTCGCGACTATGCAAATGATGGTTCCCTATTTATAAACCTCCGATATTGCCAGTAGGTATGG  
CAACACCTCCTGAAAAACTCTACCGGGCACTTATAGCCTGGCCCCCTGTTGTTAAACGTTTCT  
GTAAATCCATGAGCGATATTTGGGGAACGCTAAAAAAAGGCGCCTTAATTGGTTTTCTGGCA  
GCTATCTTGGTGGCCCTGATTTTAGTTTGGGGTTCTATGACTGGAGGATGAAATGGTGAAGA  
AAAATAACAATACAAAAGAAGCTATTGAAAATACGGTACCTCTGAAGTCACAGGTATTAC  
TGAAAATCTACCGCCTGAAGGTACTTTTGATGCGTCACCAGCTCCCTCTGGTGGTCTAACTCG  
GGAAAAACTCGAAGGCATGATGACCCAAACCAGTATGCCATCTATCGTGCGTGAACCTGCTG  
GAAGCTGGGGATGATCCAGAAAAACTTTGGATGCGCACGATAATAATGAACAGTAAGAATG  
CGGAGGCTGAGAAAAAACTCGACGCTGCTCTTGCATTTTCGATTTATGCGTTGAATTTGAT  
GATAACAAGGTATGGATTATCTGAGACGCAAGCTTTCCGGCTGGGCATCAATTAACGGTGC  
GGCTCGGGAACAAGCTGTTGCTGCGGTTACCGGTGAACGTTTTAGGACGCCCAAGCCTGGGC  
AAAACGGTAACAATCCACCCCCACAGGTAATAATGGTTGCTATTTGGGGTTTTATTG  
GCCCCGAAGGCGCTGGCAAACTACTGCCATGACCTACTTCATGGAATATCATATGGCACTA  
GGGGGTGTTTGAGATCCTTTCCGGGCTATACCTTGATAGCCCTAAGGGCAAATTGGTAAA  
AGACATCGATCTTAAAGAGCTTATGTTGATGTCTGGGGAGCTTAAAAATGTTGTTGTGGGAA  
TTGACGAAATCAACAATTCAATGACTCGTCCCGTCATATGACCACTATCAACCAACTGACA  
GGCTATGTTGGCATGCAACGTCGCAAGCTTTCTCTCGGCATCTTTTATACCTTGCAGAACTGG  
ATGTGGCTGTATGACCGCATGCGTTGGTTAACTCATTTGTTAACAGTATGTTCTGATCTGCAC

TTCTCTCCCTGGGGTAAGGAAAACCATATACGACAAGGGCAGTATATGTCTATCGTCACTTA  
CGATTGTAAAGGGTTTTTGACTGGCCAGCCATGGTCTCAATTATCTCCCATGGTATTACGTCC  
TCAAGAACTTTGGCCTTATTATCGCTCTTATAACGTATTGGATATTTTCGAAGGTCAAGAGCG  
TATCCAGATCAAAAAACGCCTGACCGTTTATGATCTTAATAAGGAGAACCCGACCTTCGAAC  
AAATTAGAGATGCGGCAGATCAAACACCTCCGGTTCGGATTA AAAACACCACGAATGACTGA  
TGATGAAATGGCAGTATATCAGCGCTTGGCTGACCAAGGTGTTGATATGAGTACTATCCGCG  
AAGTTCAAAGAATGAAACAAGGAGTGAATTATGACACCTGAAACTGCTCAAATTATTGCC  
GATGCCATTAATTCAGTGGGAGCTGCTCTCGGGGCAGCTCTCGGTGACTCTATGAGCGAAAC  
AGTCAGCACAGCCATAAACGCGGGGTTTTTAAGCTTGGCGGCTACGTTAGTAAATGTATTGG  
TCATGATAGCTGTGGTAGCTGCGGCCCTTATCAAACATGATGCTTGGCTCTATATCCTGGCAG  
GAATTTCCGTCACGCTGTATGCCTGGGGACAAATGGACAGTGGCATTGCTGGGAATACTATA  
TTGCAAATTTCTCCGTTAATTATGCTGGGTTTGTATCTAATCGTCTCGGCCGGAGTATATGCA  
TTCCAAAGTCTCCAGTCGAAGCATCAAGATGGAGGTTAAATTATGGGTATATTATTAGGTCC  
CAATCAGGGGTCTGTAAATGGGCTGCTTCGGAACGGCCCCGCCTACACCCCCTAATAACCAGG  
TGGCCATTAATGCCGCCCCGCAAGCAGCTGAATCAGGTGTTAATAATATTACCACAGTTAAG  
ATGCAGGATGGCAAATGGACAATTACCACTGACGGAGCTGTGTATAACATCGATACAACCG  
GTACAACAGAAGATACTGTGCAGTATATAACCAATTACCTGACCAGCCGCGGGGCGTCTGG  
ATCTGTTATCAAATCCGTTACAGAGCAGATTCCCATTATCACGACACGGGAATCTGGAAACG  
TCGTTAAGAAAAAACAGTGCAACTATCACAGATCCTAATGATACCACCAAGAAATACAC  
TGCTGAACCTGTAAATGAACCAGCAAATGATTCTACCGGTGAAGGTGATACTCAAATAACA  
CCGATGTTTCCGGTCACAGTGGATAATTCTACGGCATGGACGTTTACTACCCCTAACGGCACA  
GTCTACACCGTGCCCATGGCGGGCTTAGCCTGGTCTGACCCTGCCAAAATGCATGAATATAT  
AACAAACTACCTGAACAGTATCGGCGCGCCCCGCAAATGTCATCATGGAAGCTGTTAGCCGTA  
TGCCGGATGTAATGGGGGATACTGGTTTTAAGAGAACCCCGGACTGATGAGTTTGGTAACCTG  
ATAGACAATACTCAAGAGATTAAGGATATTATCGCAGGCAGTGACCAGTCTCTAGCTTCTAT  
AACTGCCTTAAAGGCATTCTTAGATGCCAAAGGCTTTTCCAACCTGTCTCCTGAAGAGCAAT  
TCAATAAGGCGATTGAGTACGGTTTGATACCGACTGATTCTGTCTATGTACCGCCTGATGCC  
GGTTATAACGTAGGTCAAACGCACCCGCCGGAATGCCTGATGATGTAGCCGTATCTTTGGG  
GCTACTGCCATCTAAAGAACAGATTGCATATAACGCCCCCAATTTTGACTGGGCGTACCTTA  
GAAAGGCAGATGCAGATCAGTACTTTGCCGAGCTAAAGGAAATCGTTGGCTATGACATTAC  
CTCGGCTAACCTCAAACAGGCTATGCGTGAGGCTCAGAAAATAACTACCAGGCAAATCTA  
CAGGCCAGCTCTGTAGCTATTGCCTTGAACCTTTTTATGCGTGGAGAAGGAGATAATCAGAC  
TATTGATATCTTCGCCGCCTATAAAGCAGGTATCCCGGATAGTGTTATGGAAAAGGCCGTTG  
GCATATCAAAGGCTGATTCTATCGACATTAAGTACATGCTGAAATACGTTGATGATTACGGC  
AATGTGGATATCCAGCAGGCTGTATCTGACGGCTGGGGGAAAGGTATCTTGCAGAAGTGGTT  
CGGGCTGTCTGATGCTGACTTTAAAAACGCTGAGTTTGCCTCTGATTACGAAGATGCAAAC  
TCTTAGAGAAAATCGGCATGGCATAAAAAAAGACCCAGGTGAATTCTTAAAAAACGTGGG  
TATTTCTATGATACCTTTCTATGGTACATGGAAATTCAAAGATGATAACCCTGGTTGGTTAA  
TGCTACAAGTTTAGTTTTAGACTTAGCAATCTTTATACCTTTTGTTCGGAGGTGTTTCCGCTTA  
GCCAAAACCTGGTATTGGTGCAGGTAAAGCTATTGCCAAGGAAACACTTATGACTACCCGTGG  
TTTAGTTATGGCACCTATTACAACCTGCTCTACATCCTATAGCTACCACTAAAGCCTTATTCTC  
ACCTCTGGGGGTATTACTCAGTAAAGTTAAGGTGCCCTCAGCCATATTCTGGCGCGGAAATA  
GGAGTGAGGTGTTTATGATTGCTAAAATAATGGCTAATCCTGCCTCAGTCGAAACAACAAAA  
GCCATGGATAGAGCTTTGGTACTCAGAAATGAAGGTAAAGCATCTGGTTCGGTTCGGATTGT  
AGTTGACGGCACTGAAATAGGTAATCAAAATGGTCTGATGCTGGATTCCAAACGGTATTTT  
CTAAATCCATGGGGCATTCTACCCCGTTTGGAGAGCCGTTTAAAGCTGGCATGACAGTTGAT  
AAAGAAGGGCTATATCTCTCCCCAATATGAATCTTGGTTTACTAATGCTAGTGCATATGG

TCGGGTACCCGGTTATGTCTTTAATAATAAAACTCTGGTTGGCTCTATTGGTGATGGGGGA  
AACTGCTTGGGCAAATGGTAATGTCATAGGTAGAGTTGCTGACAATTCACCCATCTTAAGG  
AATGGCAGTGATAAGAAGTTAGGAACACTGCTTTTTAAAGATGATAAGCCTTTCATCAATAT  
CAATGGCCGAGATATAGAAATCAAATATACGATAGCGGCGTTGTTACTTATGCGAATGAA  
AAACAGATCATTGGTTATTTACCACAGGGAATAAGTATACGGAGAGGGCAAAGTTATAG  
TCGGGCAAATCAAAGAAACACCTACTTTCGCAATCATCCATAATAACGGGCTTTCGCGCCTG  
CCAAATGCAATTTTCAGATGTTAAGAATATGCAAGAAATGGAACTAAAGCATGGCAATACC  
TGAAAACCGACAAGGCAGTAGGCAAACTTATCCTGTATTTAAACAATATCTGGACTGGATA  
GAAGATGAAGCGGTAATGGCTAAAGGAAGCCGCATAATCCCGTATTAGACGATAAGGGCA  
AACCTGTTGTTTTGCGAACTGCTGGGCCAGATGGGCGGACTATCAGCGTCCCCTTACTCCAA  
GTAGTCACACCAGATTGGTTTAAAAAAGTTTAGAGATTACCAGAGCGCTTGCCGGCAAAG  
CGGACACTCTTAAACCCCGCCGCTCTCCAGGTGATAAACAAGGTAGAATCACTCCCCAGA  
GGAATGGATGAGGACTTCATATCTTATATGCGCAAGAATCCTGATAATGTACTCTATGGCAG  
TACTGCTGAATATACATTCACCGGGGGCAGAAAGCCCGGAGACTTAGATATTCAGTCTCCTA  
CCCCGAAAAGACAGCCAGTGATATTGCTGATATAGCCCGCCGCTATACTGCAAATGAGGT  
AAAAGTAACTAAAGTGGCCACCCACTATACAGTATCTCAGCTTAAAAATGGGTTGTGGAAA  
AATATCGCTGACATATCTGAATTAGGATGGAAGAACTCGATGCCGGGTTTAAAAGGCTGA  
ATGCACCTATCAATACAGTAAAGGTAGAAGGCATTACGATGGAAGCGCCTAGTACTCAGCTT  
TATAGCCTACTAAACCGAACTGTATCCAACCTTGAAAAACAGGACCGTTTTACGGCTATGGT  
AAGCAAACCTGGGAGGCGAACTTGATTTGGGCATTGGAGCCAAAGCCCCCTCTCTGGCAGATT  
TGTATAAACTAAAGGCCAAGGGCGTCTACAATACTGTCCGGGATATCTTTGTGCCAAATCTG  
AAAAAGAAAATCAATTATGAAGCCTTGGCTAAGTCTAACCCGGAGCTGGCCGGTAAGATTG  
AAAAGGTCTTTGCCTCCGAAGCGGATACTCAAAAAGCTTTACTGACTACGATACGGGAGAA  
ATCCCCAAAATTGGCTGATAAACTGGAAGATTTGCTTGTGAACGGAATATGTCAAATGCAG  
CCCCTTGGAAAGCTGCCCGCAAATAGCACCGGATTTAATACCTGAAATAAAGGAGTTGCTG  
CGTGCTGAACAACGGTCTATGTCTGCCGCCGATGGCCGCCATGACGGCCGGAAGGGATG  
GACGCGCCAGTGCCATAGTAATAGCCGGCAGACTGGCAAAAGTGGCGGCAATGGAGAAAGC  
CCGCTTGAAGAGGAGATAAACCGCCGTGCCAAGCTGATAGAAAAGAATACTACGTAAATTA  
CCGGCACGTATGCCGGGTGTTGGTAATATGAGCAAAACCAGAATTACCGCTACAACACTGG  
AACGGAACTGCGCACCGGTGGGGGCGATTATGCCAGCCTGCGCAGCCGGATACCGCCATC  
CAGAGGGGAAAGAGTCCCACCGCCGAGAGTTCCCTACCCTTAATCCGCCGATAATCCGCCTC  
CTAGGGTTCGATCCTCCGCGCATTACCCCGCCAGATTTTAACTACAAACGAGAGAAGGGCAG  
AAATGACAGCGAGGAAACCTCACTTAATGCCCGTCCAAACTTAAAAATGGGGATGTAGCC  
TGGAACAAGGCGAACTGGGTGCTGGTGATGATAAACGCCCTGTTTGGATAATAAAACGTG  
CCAATGGCACTCATGAATATGTTTTCCAGCCACCGGAAGGGGCAACCCGATTGGAAGGCAC  
ACCTAAGGAAACATTCTTTACGCGGGGTAAAAAACCGCCTACCAATCTGACCCAGCAAATG  
GGAGTTACTACAGCTAAGATAAATTTGAAGGATAATCCGGAGATAAGGTTTGTCCAGACTA  
AAGCGCCTAAATTTAAACCATACATCCCAAAGAGTGTCCGGCGGTCTATAGGCATGTGACAA  
AGTGTACAAATATTCCCAGATATGCGAAAGGCCGAGTGTTTTACTCGGCCTCTTAGGTTCT  
ATTATTCTTACCTCTTAGCATTTTAAAACCTCCCTGACTCTTTAGGCACGACTGAAAATAGCA  
TGCTTATATCTGATTGGGCAATTAATAACCTTCTCTAAAGACATTGGCACATGTTTCCATTT  
CTTTCATTGTCAATTTCTGGCATTTCCTCGTCTCTGATACAAATATATAAGCCCTCTATATATTC  
CTTGGTTGCATTAGCTTCTAGCCATGCTCTAGGGTTTTTAGCAAACCCCTTCTCTAATATCTCT  
CCTACACCTATCGTCCAAAGCATAGACTCTAGCAGCTCTTTTCTTACTTTATCTTCTGGCTGG  
TAATAAACAGTAAATCCTCTTCCCTATATCCAGTGCCATATTTCTTACTCCTATTTGTATTCTT  
ATATCTCTATATTGTAGTATGTCAAGGACAAGTTATTGATAATACAGAGACAATGTGCTAAC  
ATTCCCTTAATATGAAATTAAGAATTAAGACGAAATAAATTCCTGTCTCAAGCCGATTA

GCAAAATTAGCAGGAATGACAAAAGAACTATTGGCAGGCTTGAAGCTGGTAAACATAAAC  
CAAATTTTCGTAACCGTGCGCAAACCTTGCCACGGCTCTTGATGTAAAACCAGAGGATATTGAA  
TTCTGATGAAGTTTGAGTGGGATACAAGAACCAGAACTTGGGTTCGGATACTTCTTTATCATA  
TTAGCAGTTATAATTCCCACCTTTTGGACCCGGATGGAATAATGATTCATGGATGGCGGTGCT  
AATCCTAGCCTCACCCGGTATTGCTCTTATCACATATAATCTTATTCGCTATGGCCAGCTCCG  
GGACTATTACTGGCTATGGTGCATGGAAACAGATGAATTCTTCGGCCCCTTCAACAATGACG  
TTGAAATGAAGCTTTTTTCAGCCACCTCATTATCTTCCTGGTGGATGGCAAATCTTCTGGATAC  
CAGCCAAAGACCCCTCTTAAAGCTACTAAAATCATTTCATAAGTGGGTTCAGAGACGCTGAAAA  
AGTCCTCCGTAACGACCCAGAATATAAAGACAGAATGCCGAAGTAATACTTTTTAAAGATATT  
TAGGATAGGATGAAACAAATGGCAAGAGTAAAATGGAGTGGGTTTATTACAAAGCAAAGCA  
CCCTAAACGGTACGAGTAAGCTTGTAACAAGGAAATTTAAGGTTTGTCCGGTATGTTTAAGT  
ACCTATTTTGAAGCATCATATCAACCTGGTTTTTCATCCACTGGCTAGATATTATTGCAAAAAA  
CATCGAGGATTCTTTTTTATGCCAAGACGCAAACAGAAATTATCCGAAAATAATAAGGAGA  
TCAAATTTATGTTAGACCCACAAGTACAAATTGAACTACTTAAGCGAACATGGGACTTAGCA  
GGTATTGAAGCCAACCAATACGAAGATATATCTGTTTCGGAGAAAAAGATTTATAGATGTATT  
CGATAAAACTTACACCACTTTGGCTACCATTTTAAATAAACCATTAATTCCTAATAATAGA  
ATTAAGTTTTATTTGGTCTGCGGAATAAATTAGGCCGGATTAAAAATCCGGCCTTTAGTATAT  
CTGAAGTCTTTATTTAGTTACCATACCTATCAATAAGCTCTAACAACCCATCCCTACCAATAC  
CCTTCAACTCCAGCTATAGCTGCAAATTATCTACCGGGCTTGCTTGCCGGTGGACTCTCATCA  
TATCTTCTGTACCCAAAGTAGAAGTATAACGCCTGGTCATAGCAAGAGTAGTATGCCCCAAC  
ATGATTTGCAGGGTAAACTCATCCCCACCATTACGTAGATAGTTTATAGCTGCCGTATGCCT  
GAAAGTATGAGGTCCTGGCTTAGCATCAGTGATATTAGCCCTCTTACAAAGCTTTTTTATGGC  
TTCCTGAACACCACGACAAGTAAGTGGTTCGACGTTCTTCTGTTAACCATAAACATTGATAAT  
CATCATCCCTATTAAGCATATACTTTAACAAGGCTTTTTGGGTCTGTTTGCCTATTCGAACAA  
TCGGTTCTTTTGACCCTTTCCCAAATACACGAACAGTTTCTTGATTAAAATCGATGTCATTAA  
TATTAATGCCGAAATTTCTGCTAATCGTAACCCTGTATCCATAAACAAAAATATTAAGCA  
CGATTGCGTAATCCTAAAAAAGTTGTTTTAGCATTAAACACCCAATAATTTTTTTATGTCCCA  
ATTGAGAAGGGCTGGATTACTTTCTTATCTAGCCTCGGAGGTTTTAATGTGCGCATTGGATCG  
TTTGCAATATAAGCCTCTCTCATTAAACCAATGTATAAAGGCTTGGAGTGCACGATAATATGC  
ATTCACAGTGTTATTCCCGCACCTTTTTCTTGCAAGGATAACAGGAATGCCCGTATTAATTG  
AGGAGATATTTAGAGGCTAACTGGAGACTGAAGCGATGACAAAACGACACAAAACAGTTA  
ACACGCCGACGGTAAGTATCAACTGTTTTTGGAGATTTACTCTCTACTTTACATGAAATTAAG  
TAAACTCGAGGAGCCTTTTTAATTCATTTGATGCAGGACTGTGCTCTATGGCACGAATGAG  
CTCATCGTAATTAATGTTGTCAGGACTGTGCTCTTTCAATTCATTTTCGGCACGGGGAAGGCT  
GTTTTGACTGTTTTTAGCTTTATGGTGGGCCATCTTGGTCTCGAACCAAGGACCTCAGTCTT  
ATCAGGACTG

>Dmc\_IME1-7

GGAGCCGGAGGGATTTCGAACCCTCTACCTTTTACTGCCAGTCATCAAAGCTAAAACCAAGC  
ACCACGATTACCTATCGGCCTACTCTACTTCTCCTTAATAAACTAGTTTTTTATTGACTTCGAT  
GACTACTGCACTTGCCTGGCATTCTTCTAAAGAATGAAGCCCATGTCCATTTTTTAAATATAA  
TCTTCCATCTTGCTCTATTAATTTTCTACAATAACCTCTCCATCCACTACACAAAGGACTAT  
ATCCCCTTTTTTGGGGGCTCGGTCTCGGTCTATAAGGACAATATCTTTCTCACTTATAATCGG  
CTCCATACAATTCCCGCGTACTTTGTAAGCCTCTATATTTGGAGGAGCATTACTTTCCCTTGC  
TCTGTATATGTAATCAATTGGTGTAAACGCTGGATCTCCAGCATGTACGATAAAATTATCAT  
ACACAGGTATAGAAACAGGAGCCATAAGTTGATATTTCTTAGTACTTCTTCAGGTGACTCT  
ATCCTAACTGTTTCAGGATATGATTTGAACTCTTTGATATCAACACCAAGCGCTCGTGAATT

TTAGATAATGACTCATAACTTGGCATAGTACTTTTACGCAGTTCAAGCATCGAGATATAACC  
GCGAGTTAAACCACTTATTTTCAGCTAATTTAGCTTGTGTAATTCCACGCGCTAGTCTTAACTG  
TTTTACTTTTAATCCTATTTGGATATCCATAAATACCCCTCTGAAACAATAGTATCATAACTTG  
ACCAGTATTTGCATGATATTGATAGGAAAATGGAGATAATAAGCAATGTACAATACTTTAGC  
ATGTTGCTACTATGGTATTATTCGTTCTAACTATCTCTCTACGCCTTTGACTCTCTGCACATAC  
TAATGCAACAATAGTTGTCATGAATAACATCACTGTGCGCAATTAATCTTCTAGATGCTTAAT  
CAATTTACAGAAGGATATGAAACTAAGTAATACAGCTTTTTCGAAAAAGCTTGGCATTAAATC  
GCCAGTTGTGGCAAATGACTAAATCAGGTACTAGACCTATACACCTAACAGTACTTAAAGCC  
ATTATCCGGAACCTCCCCCATCTAATCCCAAATGTAATAGTCCATATGGGCACTAAGGATAT  
CAATGAAACTGACTAAGCGCGACTCTGGACGTATTGGGGGAATTCAAACCGCAATGCGCCA  
TGGAATAATCACATGAGGGAGATTGGCAAAGTGGAGGCGTCCCCGGGCTACTAACTGG  
ATGGATTTACAGGTGTTACACATCAGAGAGAGAAAAGAGAGGGAAGGAAGAGCTACCGAC  
AGCCTTACACTATCTCAGTTAAAGCACCTTGTGAAAAATGCAATGGAGGGTGGCTACTAGTC  
CTAGCCTACCCTCCAGAAAGGGGAATGAGGCAATGCCTCAACAACAAGTAACCTATCGTAT  
CAAGAACGAACGCACCGGTCAATGGTGGGAGGGAAAGGCTGATAGCCCGATAGATGCCATG  
CGGAAAGCCTCCCTCGAATACCCGGTAAAAAGCCCTAAGTCCGGCTGGACAGCTGAAAAC  
GCTGGGTACGTCAATGGTGTCTGCTGGTTATGGCTCATGGGTAAACCAGACTATGTCCGCA  
AAAACAACAGAGATGGTGAAGCATGAAATCCTTTCCACGTGCTTACCGCGTAGCTAAAAA  
AGAACAGGAGAAATAATATGCCTTATAAAAAGATATTTCCCGGCAAGATAGTAAGTTTTGAC  
CCTTATTTTGGAAATGGAACGTGATGGTCTTAAGTCATTTATTACCGTCACAGCATTCTATG  
GATGCACCGGGCAATCTATTGTTGGATGAATTTCAGAAGTCAGAAGTCCCTATRCTGATAAC  
ARTCCATAATCCCCAAACCGGTCAATCATTTAATGCCTAYGYAACCAAAGTTGTGCAAAATT  
CTCCCGCYGTTACTGGAATACCATCCRTATCGACATAGAACGCATACTCAGAGCAGAAGAA  
ACGCCAACAGCTATGGCAAGCTACCCCAAAAAGGATGACCTTAATGACTAGTGGAATGGTT  
ATCTTGGCTGAGATACGTACCGAGACTGAACAAGGCCGTCCCGCCCCTACCACGGGCTGGG  
AATGGAGTCCGGGCTGTACCCCGCTCAGAGACCCTTCCCCTGGCAAATGGATTGTTCCGGCGC  
ACAGCAGACAGCTTTGATGTGATGTTCCGCTCATATTTGACTCCTGAACTACGCAGCGGTGG  
CCCTGAATACTGGATAGGCAGTTTTAACCCTACTGATACGGGGGAATATGTAGCCCGTGAAA  
TGGCAATCAAACCTACGTAATGAATCATAACCGACAGGAGGCTGAACGCAATGGCCACAAC  
CGTCATCTAAACCAATTGAATTGTCACCCCGCCGCTACCGCAAAGGTAATTATATGTTCTGC  
CCAGTAAAAGCTGACCGCAATTACAAGTGCCCGGAGTGTGGTTGTCTGGTACAGCCAGGGG  
AAGTTGGATTTACCCGCTTTAAGATTATTCATGATCTGGTAACTGAGCCTGTCTGGGATGTAC  
TGCATGCGTGCTGCGTGGAGGCAAGGGAATGATAAGAATTAATAATTGGTCATCTAACGCTCT  
CTGCGGACCTATCTCAATCCGGAGATGTAATTATTACCTTGAGGACTGAAGATGGCACACCT  
GTTGCTGCCGCAACTCAAAGACACTTATTGCCGCTATTGAGGCACTGGAGAAGACAGCGG  
AATAACATCCAGGACGGACAGGGGAGTGTGATCTCCCTCCACTTCCCTGTCCGTCCTTAAA  
AAACACAAAGGAGTGACATATGGTTCGTATCAACACTGAGTAAGAGACCAATTCTGCAAACC  
TACCCTTGTACCCACTGCGGCGGGGAGACCGAATGGGATTTTGGACCTGGGCTCCAATCCACT  
ATGCGCATACTGTTGGGACAACAGTATAGAAATAACCGTCAAGGTTGAGCTGGCTGATAAG  
ATGCGTGCCTACYRCCAAGAGCATAAGGTTGAGCTGGCTGATAAGATGCGTGCCTACTACCA  
GGAGCATAAGGTTGAGCTGGCTGATAAGAAGCGTGCCTACCGCCAGGAGCATAAGGTTGAG  
CTGGCTGATAAGATGCGTGCCTACYRCCAGGAGCATAAGGTTGAGCTGGCTGATAAGAAGC  
GTGCCCGTTCCGGCTATTTCCAATTAAGTCTGAAATGAGGTCCAATATGGTAATAGCAAT  
ACGAAAATATACGATAGACGATATCCTTGCCCGACTTCAGGGCGTCAAAAAGAATGGATCC  
GGCTACATGGCCTGCTGTCTGCCATGAGGATAAAAACCCGTCCTATCAGTATGCGAAAA  
GAGTGGCAAGATTTTGGATCAAATGCTTTGCCGGATGTAGCTATGAGACGATCATGTCCGCGT  
TGGATATGCCTGTTAATGATGCAATGCCCAAACTGCCAAGCCATCCAACGCGAGATAAA

GCAGACCTATGACTACACAGACAGAAGCGGCCAGTTGATATTCCAGGTAGTCAGGTTTGAG  
CCCAAAAGTTTCTCCAGCGACACCCTGGCGGCAAGACCGGCTGGCTCTGGAATATGAAGG  
ATATCGAGCCGGTTATCTATCATCTGCCGGAAGTGCTGGAAGCGGTAAAAACAGGCCAGAC  
TATTTGGATAACCGAGGGCGAGAAGGATGCTGATAACGCCAGGGCTATGGGCTTGGTGGCC  
ACTACCTCCCCGATGGGGGCGGCAAGTGGCGCGATAATTATACTAATGACTTATTGGGAGC  
CTCGCAAGTAGTAGTTATTGCCGATAAAGACGCTCCGGGGCCGTA AACATGCCTCCGATATTG  
CCATGTCCTGCCGGCGGCAACGATACCGGTCAAGATTATCGAGGTACCCGGCGACGCCAA  
AGATTTTACCGAGTGGTTGGAAGCCGGCGGCCAGACATCCGAATTGGATGATCTGGTAGCTA  
CAGCTAAGAGCTATACGCCATCAAAAAACCAGAGCTTATACTTTCTGTCTGATGGCAAGTTT  
TCTATCGAAGCCGGCCGGATTATTTATCATTACATACAGGGATAATGTCCCCTACGATGCTCC  
GCTGTGCAATTTCTGTTGCTGCCGTTAAAGAGGAGATCATCAAAGACAATGGCATAAACCGCA  
AACTTTCTTCAGGATTGGCGGTACAGACTGTACTGGCCGTCGTTTCCAGATATAGAAGTC  
CCGTCCGAAAACCTTTTCATCCATGTCCTGGGCATTATCCCAGTGGGGGAATTAAGGCTATGAT  
CGAACCCAGCCCTTCAGCTGAACGGCTATTACGCGGGGCAATGCAGTACATGTCCGATGGAG  
GCACCCTGCCGATTATTTATGAAAATACCGGCTGGACTAATATCAACGGCAAGGATGTTTA  
CCTTACTCCCCACGGCGCAATCGGAGCCGATAATGTTGAAGTGGAAATGCCATCCAATATCA  
GCCATTATGATATACCCTCGCCCGAACAGAATGACGATGTGAAGTCCTTCATTGAGGCCAGC  
TTTAATTTCTCAAAGTAGCCAAGTTATATATTACCTTGCCGCTGTTTGC GGCTATGTACATG  
ACGCCTTTGTGACAGCGCATTGATACCAACTCAACCTCTGGCTGATTGCCGGTTCTGGCAGC  
CTTAAAACACGATAGCATCACTGGCACTCTGCCACTACGGAAATTTTGATTATACCTGTGT  
GCCGGCTGCCTGGCGGGATACTCAGAATACACTGGAACGCATCCTGTTACCTGCAAGGATA  
TGCCGGTGCTGGTAGATGACTGGTCACCCGGCCAGACCACCGCCTCACAAAAGAATTTGAC  
GCTAAGGCTGACTATGTATGCCGCGGACAGGCTAACAGACAAGGCCGTAAGCGCATGTCTG  
CCGATACATCTATGAGGCAGGAATATGTACCCAGAGGCTTCTGATATCCACCTCGGAAGGA  
CAACCGCCAGGCGAGAGCAATAATGCCCGTTTTCTGATCATTGAAATGTCAAAAACAGATAT  
CGAATTCCTTGTCTTACCCTATCACAGAAAGAGGACCATCTGTACCGCCGCGCTATGGCTC  
ATTACCTGGCATGGCTGCAAGCGGACTGGCCGGCGAAGAAAGTGTATCTGCGCCAGCGCTA  
CCAAGAGGTTTTTGAACAATTTACTGAGAGTCTCCGGGGTGAAAATGTGCATCTCCGGCTAC  
CCAGATCCATCGCTCTGTTATATATCGGTCTGGAAATGGCTATTCGCTGGGCCGAAGAAAAC  
GGAGCAGCGGATATATTTGATAGGTTTATAGATGAAAGCGGAAACGGGGAGAATGATTAG  
TCGGGTCTGCGTATCTCTTAAAACAAGCCCGCGAAGTATTTATTGAGATGGCCAAGCGACAG  
GGTCCCCGGATAGATGAGGCTACACCATCGAAAAAGTTTGTAAACGCCTTAAATGCAGCCCT  
TATAGCTGGTACTGCATATCTGGATGTTAAAGATGGGGCAAATCCTCGGTCTGCTTACCTG  
GGCAAACCTCTGATCGGTTGGGATGACCGGACTAACGGGCACGTTTCCCTCCATAATGACCTG  
GCCTACCAAGTAGCCAACCAGCATTACCAAAAAATCAATGAGGCTTTTGTAAAAAGGATG  
CTGTATTTATGGATCTGGTGAAGCGTGGTTATGTGGATCCGGGTAAAGATGGTAAAACCACT  
GTCTTTGAGTATATCCCGGTAATAGCAAAGGCATGCCGTGTCCTACATATCAAACGTGAATT  
CTTGGGGCGGGATGAACAAAAGAGAGGTGAGTAAAACAATGAAAAAATGTGTGTGCGCCCC  
AAAAATATCCCATGTATTA AAAAATGGTGCAAGAAGTGCAAGAAAAC TGTTTTAATCGTAA  
GCCAAAATATTCTGAACGTGAAATTTCTTGACCTTGAGGGTGCAAGAGGGTGCAAGAAG  
TGCAATACAGGTGCAATACAGGTGCAAGAGAAGTGCAAGAAAATATAAAGCTAAATTA AAA  
ATAGGTGCAAGAGAAGTGCAAGAAAATATTAAGCTAAATTA AAAATACATACTCGTAATT  
GTCAATATTTCTTGACCTCAAACAATATATATCACTCAGTTTTAGGGTGACACATAAAT  
CGGTATGTAAGATTGTTAAATCATTCTCAAAGGATGTGACATAAATGAAAGTCGCGTTATAT  
GCCAGGGTAAGCACCCGCGATAAAAATCAGGATCCGGAAGTCCAAC T GATGGAGCTGCGGA  
AATATTGCCAGGAAAACGGCATGGAAATAACCAGGGAATATATAGATCATGCCTCGGCCAA  
TGATTTCTGTCAGGACGGCATGGAAACAGTTGTTAGTGGATGCATCTGCCCCGAAAGTTTC



GGGGGTTACTGGTGTGGAACTTGACCGGGCATTCCGCGACATTACGGTGGCCACCTCGTCC  
GTAAAAATGCTGCGCAATGCCGGCATAGATTTTATTGTTACCACTGTCCCTGTTCTTTCAGTC  
CAAGGTCCAGCTGGAGACCTGATGTTTAAACATCTATGCCGCTTTTGCCAGTTTGAAAAGGA  
CACCATTATTGAAAGAGTTAATGCCGGACTTCAAGGGCAAAGGCTAAGGGTAAGGCATTC  
GGTCGCCCAAGAAAGGCAATAGACTTCAATAAGGTTTTGGAAGCCCACGAGATAGCCTGCT  
CACGGGTTAACCGGATTACTAAAGAAAATCAGGGTTATTCCGAGACGGCGAGGATATTGAG  
CGAGCAGACCGGGCTAAGAATTACAGCCGGTTGGGTCTATAACCGGCTTAAGGCCGGCAAT  
TAAAATGCTTCAAAAAACCCACCCCATTTTTGCATAAAATTTAAAGCCAAAAATCTTATCG  
GATGGGAGGCTTCAAAAAATAAATGTTTTTTGAAGATGTTGAGCTACTAACTTGATACCCAT  
TATTCAAAGAAAGTCCAATTTGAAAGGAATGGCAAATAAATGAGACATCTTAAGGCCGGTAT  
GGCAAGGCCGTTTTATTTATTGAAGGATTACGTCCGAAAAATAGATTACACGAAAGCCCCGG  
AACACATCATTTAATAGTCACAAAGGCGAGCCCCAATTTGATGACCAGAACCTTATCGGTA  
AAAGAGTAGCAATCCCAGTTTGTGGACCTATGTATTGGGAAGTTATGGAATAAGCGCAAAA  
AAACGGCAAAAATAATGCCCTGCTTAGTGGTTTTATTTCAAAGGTAATTGTGCTAAACCGTA  
AGACCCCAAAATTCACAATTGTAAAAAACACTGTCCTATCTGACTAAAAATATACTAAGGGA  
AAGGAAACGAGATGAAAACCGTATTAATACTAAAATCAAGGGCATCACCCCATTTAATGCA  
CAGATTTCCCGATGGCGGGCGCAGACGATACATCAAACGACGTAAGTGGTGTACCGGATTGG  
AAGGCAGAGGCAGAACTAGCGTTATACAAAGATGATCATGGCCAAATCTATCAGCCAGCGA  
GCCATATTGAAGCTTCGCTTAAAGAGGCCAGTAAAACACTAAAAATACCAGGCAAACGAGG  
GGCGACCTATTCAAAACACTATTGGTTCGCTGTCTCTGTTTTCCCTGATGCTATCACTCATTT  
AATACAGAATTACGAAACAGATAGCCGTCCTGTTGTGATACAGAAAGCACGGATAGTACGC  
TACAGGCCAATATTTAAGGAGTGGGAATTGGAATTTGAAATCAATATTGGAGATGAACAAA  
TCCCTATAGAGGTTATCAAACAGGCTCTCGATCATGCAGGGCTATATGTAGGTATAGGCGAT  
TTTCGCCCAGGACGTGGAGGAAAATTCGGCAAATTCATGGTTGTCAGATTTGAAGAGAAAATA  
ATATAGTCCGTAGCCCTGCGGGTTAGTCAGGTGAGGTATGGCTCGGCTTGGTTGGGCGTGGT  
ATGGTCAGGTACGGTTAGGCACGGTATGGCAGGGTAAGGTTTTTAAAAATTACACGAGAGG  
AAATACTCAAATCTGATCTTGAATCGGGAGTTAAAGAAAACCTTCTTACAGCTGTTGGGAATA  
AACACAAACAAAGAGTAATTAGGAGAGGGCGAAATGGTACTGAAACGAAAGGGATATAC  
GAATTCAGCCTGGCTGTAGATGCCATGACCTTGGGCCAGCTGGGCCAGGAACTGGATAAAT  
GCAGCCAAGAACTGGGGGGCTGTGAATATTGCTCACAACAGGCTATCTGTTTGGATCTATGG  
CTGCACCTGGCAGATACGGTAAAGGATGATTGTGCGTTAACTGCCCGGCAGTACACTGTATA  
TGCTCTAGATTTTAAAAATATTAAGGCCCGACGGCAGATGATCCTGCCGTTGCTTATCGCCT  
AAGCGCCGAATAAAGACCCAGACAGTACCCGCACTAATAGGGAACAGGAAAAACCATTTA  
ACAAGTCCGGCTGTACCTTCAAGGAATGAGTAATTCAGAATAGTAAGCGTGGTATCGCATA  
CGTAATAAACCCATAAATACCACCTACCACATTAACAACCGTAACGAACAAATTACCGATG  
GCACTATCTGAATACTGCATAACCGAAAACCCAAGCAGGGCATTGAAAAATGACTGTTCTG  
GGTCTCCAAGCCAAGTCCCCTCAAATATCAGGCACATTACTTGACCTATGATATAGCTATAA  
ACAATCCATACCAGCCATTGCGGTCTCATTAGTAACTCGCCAACTTTTCGATTTGTCATTTAC  
CGATAATCACCACTGCAACAGGTACCAATACCCACCATGGCACACCTATAGTCGCGCACCAG  
AAGACTTGCCAAATGAGCCCTGCAACTGCACAGGGTAGTAATTTACGCGTTAAACCAAATG  
ATAGGATAGTAATTATGGCCCCGCCGCAAAAAGCTAGGCTAAGCCAGAGAAATGCAGATGG  
GAAATTCATCTCTTCCAGAAAATCTGTAATCTGCTGGCCACCGGGCAGTTTTCCGGATGCA  
GATTGACATAACCACCCGGTCGGCATAGTACCCAGATCATCGTCTGTCACAATCTCAACCGCA  
TCTTCGTCATCTCCACAATGAAGGCTGACTGGTTGCAGGCAGCATAATTAATCACGGCCAC  
GCTCACATCTGCGTCAGTGGTTGTTATCCGGAATGAGGGCGTGGCATCATTACTATTCCCGG  
ATAGATCCGTAAATGTAGTGGCGTATTGCCATTCCCACGAGCCTTTTAATACCCACCAACC  
GTTATTTTTGCATAGTATAAATACGGCATTGATCCGTTCTGGGTAAAGTACCAGTCATTGACA

TTATCAATTATAGAGCCAGCATAAGCGGCTGAGCCCTCTAAGAGACCATCTATATAGATATT  
CATCGTGCCTGCAGATAAAGATATCTTATATACATGTTCTGAACTGGATATATCCGCCGCCG  
TAACGATTGTATTATTTGCATTTCTGTTATTGATATATTTATGTCTGTTGTAGCAGTGCCACT  
CCAACTAGACCCTGAATTATTTGTAGTGCAGTATCTGCCGTTAGCATACGGATTAGTAGGGT  
TATACCAGTGAGTTAATTTATTACTGGAGTCCCCGTTTGGGAGTGACAAGACTATTGCATAA  
CGTGTCCGGCAGTTAGATTAATTATATTGGAAAAATCAAATGTATGATTTACAGCAGAAGT  
TGAGATAGTTGAAGCTACCACCGAACCCTAACAAGGCACTTCTGTTGGCACATCGCCGC  
TAGTTGCATAGATGGCATAATTAATAATTTCCAGTTGGATTGCCTACTCGTTGTGTTCTAAAGG  
TAAATTGGTTGACAGCCACATCATTAGAAAATTGAAAGGTCTGTGCTATCCAGTTAGCACCG  
TACATAGATGTAGCTGAATATGCAGTACCATTATATGGAGTTTCTGTATAACTTGATGAATT  
ACCTGCCGATACATCTGTTCCAGACGTATAAATCCAGAATGCTCCAAATTTAGATAGGTTAT  
AGCCATCATTAAATCTACCACTTAATCTCAAATCATTTCAGCTCAAGTGTGCG  
GAATCAACAACGCTCATACCGGCTGTGCCCGGAAATAGGCCAGTTTGCCCCCATGGCAGT  
TTCGCCGCCGGTATAGAGGTTGTAGTTAATAGCGGAGTTCTGGCTGATCTGCTCAACCCACA  
TCATCCAGGGGTTGCTGCCATAACCTGGCATAAAGGGTATATCCAACCCGCCGGAGTCTCTA  
AGTGCCAGATTAGAAAAGTCCGGATCTATATAATAACCATCCAGCAGGCTCTGGGAAGACC  
AGATAAATGGCACAGATACCTGCTGGGCGGTATAGCTGGCATTGTGGCCCCGGATATCCGCC  
ATATAGATAGCATCCGTAATAGTTGAGGCCATGATCGGTACAGCCCCTGTAATGGCCACCAG  
GATAAAAGGAATAACAGATACCAATAATTTCTTCATGCGTGCCTTCCATAAAGACATAACC  
GGTGTA AACCGTAAATAATGGTAATAATCGCTAGGATAACCCCGTTAAATAATCCCATGG  
CCGTACCACCGGCCAAGATATAGGAACCGGCTATCATAGCCGATTGATTATCCGAGTATTTA  
AATTGTGACCAGCCAAATAAACTACTACTAGAATCAGACAAAGCAAAGTGGTAAGTATCT  
GCCAGCTGACAGCGTTATTAATATATCAGCCAAACCTGTTAGGGCATCACCCACCACAGTG  
CCATTCCATTGTTCTGCCAGGTAGTAAGCATATCAGTGCCCCATGTCCTTCTAGTAAGGTCT  
AACCTTGTGCTTGGGTGGAATATATCTTGGGGCACATAGTCTGTAATCCGGGGATGGTTCC  
ATTACCATAAGCAGCTCCGTAGTCATTAATACCGTCCCCTGGTTGGTTTCGGTCAGTAATTT  
AACTGACCAGTTGATCTCTAGAGTCCGGCAGACTTCTATAATCCAATTACCCATCAGGGATT  
GATTTTCTTCTTAGTAGATAAATTGGCTGTAATCGGAGCCAGTCATAGTGTAGTTAACTTCCG  
GAGGCGTCACCCAATACTGAGGGTTCCCACCATTTTGTAGTACCAGAGCATCCTCCCAAGTG  
GGAGCATCAGCAACTGCAAAATAGAAGGCTGAATACCCCATGTCATAACCGGCGTTGTTAT  
AGGCATAAGGCTCAACCGCTCCCAGCTGGGTAACGCCATCTGTATCCATAAGGCGAAAATG  
AAAGAGCTTGTGGCTGGAGTAGTTGGCTGCCCTGATGAATAGGCAATAGTGTACTTGAATG  
CTATCAGGGTATCACCCGTCTCAACAATGTTATGGACCGCTTGAACATCATCCAGGGTATAA  
GTAGTTGGAGTAGCAGGGTCAACAGCCAATACCGGAGCAGCAGTAAATAGCGATAGTATTA  
TGGCTATTACTGTTGCGAGGGGCTGTTCCGGCTAAAGACCTTCGTATATCTTCTGCGCATCTCT  
TATACCATGAACGACAGGGGGTACCGGGGAAGGCATCGACCACGCCTCCAGTTAAGCAAT  
GTATTCCTGTGTACCCAGCAGGTTTTGCAAGTGCCTGGTACTGCGATGCCAGTGCGAAAG  
GATAAGTTCTATATCATCTCTAAAGCCTGAGATATCTCCCATAGCTACACCTACCACTGTTAG  
CCTGATCGGTTTTACCCTTTCTGTGTTATCTCCATGCTCTAAGTCTACCGACCTCTCAAATTA  
AGTAAAGGCAATTCAGGTGTTAAGGTATTTATATTAATTATTCATATACCCCTCAGTGATTTT  
GCACAATACGTTGTGCGAATTGGGAATTTAACTGGTTTATTATTCATCTCAAAGCCAAGTTTG  
ACTGAAAGGAGGTGAATAATTTGAAAGTATTTGGTGCCTTGC GGCTATATTTGGAGTCATC  
CTCCTGTTTAACTTCATGCCAAATCTGACTAACTCTACCCATGATCTACAAACGGATGCGGCT  
ACCCAAGCTTTTCTGCGTGACTACTGGAGCCGGTGAGACAGCTGCTGATGTAGTACTAAC  
TACAGATCCTTACCAGGACCGCACTACATCAATAACCGGTATTATATCGGACAATGTATTGG  
ATGTTAACCCACTGGTTGCCGCCACTTATACCACCGCTACCAATACCCTACATGTCACGGGT  
CTGGTAGCTAGTCAATCACGAATCTGACCATCGCTTATGAGACTGACGCCCTATCGGACTT

TACCATGATGGGCACAATCGTTGGTTGGACACCGGTTTTGATTGTAATAGCCGTTTTAGCAG  
TTATTGGCGGCACAATCATGGCTCTGATTCCCTCGGAGAGCATAATCTCAACATTTTAAACAA  
ATTAGTAAAGAAAGGAGGTGAATTGAAGTGAGTAGAATGTTAAATATTGGTGGCGCCATAC  
TCGGAATCATAGTTTTGGCTGCCTTTTTCCCCGAAATGACCGCAGCTCTTCAAACGCTGATGA  
CCGATGCCAATATCGCCGATTACACTATGTTGAAACAGTCCTGGGTGGACTCCGGTCTCG  
CTCTGGGGCGGGCCTCTCGGTGTTGTAGGCTTCTTGATTGTCAAAGAAGTCAAAGCTTCCCG  
TGGTTCGCGCCGCCATTCTGGCCGCCCTGCGCTAACTCACTTTGAGCACCTATGTTATTTG  
GGCAGAAAAACGAGTACACGGAATCCTTCTTTAACAGAAGACAGCAGGTGTTTGCCATT  
ACTCCTGCCCGTAGACGTAGGATGCGTCCGTGATGATAAGTCGATGCAGGGATGGGCATTGC  
TATCCGATTGCTGCTTTCCTCAAAGAAAACCTCAAATTCCCTTTGAGTTGGTATGCGAACGTG  
ATGTAGTTCCCATCTCTGTATCAGGCGACACAGCTAAGCAACAGAAAAACGGTAAAGACAT  
CGTCAATCAAATAGGCAGAGAACGCCGTAACAAGCTCATTTTCATGCTGGATCCTGAACCTA  
AAAAGGATAGGGCAGCAGATATCATTCAAACCTTATCTATGGTGGAGGTGCCACTTTGGTT  
TTGATGATGATTATCGGGTGTTCCTCGTCAGGGAGGTTAAAATGGCCATTCTAGGGAAAAGG  
GCCAGCACTGTCACAACCCGTACACTGGTAATAGACACCCGGTCTGGTTGGGATATCGAAAA  
TATCGATTCTGAAATCATAGGTCAATCATGGAAACGCTATTTATATGATGGCAAATGGCTGC  
CAGTGGTTATTCGCGACTATGCAAATGATGGTTCCCCTATTTATAAACCTCCGATATTGCCAG  
TAGGTATGGCAACACCTCCTGAAAACTCTACCGGGCACTTATAGCCTGGCCCCCTGTTGTT  
AAACGTTTCTGTAAATCCATGAGCGATATTTGGGGAACGCTAAAAAAGGCGCCTTAATTGG  
TTTTCTGGCAGCTATCTTGGTGGCCCTGATTTTAGTTTGGGGTTCATGACTGGAGGATGAAA  
TGGTGAAGAAAAATAACAATACAAAAGAAGCTATTGAAAATACGGTACCTCTTGAAGTCAC  
AGGTATTACTGAAAATCTACCGCCTGAAGGTACTTTTGATGCGTCACCAGCTCCCTCTGGTG  
GTCTAACTCGGGAAAAACTCGAAGGCATGATGACCCAAACCAGTATGCCATCTATCGTGCGT  
GAACTGCTGGAAGCTGGGGATGATCCAGAAAAACTTTGGATGCGCACGATAATAATGAACA  
GTAAGAATGCGGAGGCTGAGAAAAACTCGACGCTGCTCTTGCGTATTTTCGATTTATGCGTT  
GAATTTGATGATAAACAAGGTATGGATTATCTGAGACGCAAGCTTTCCGGCTGGGCATCAAT  
TAACGGTGCGGCTCGGGAACAAGCTGTTGCTGCGGTTACCGGTGAACGTTTTAGGACGCCCA  
AGCCTGGGCAAAACGGTAACAATCCACCCCCACAGGTAAAACCTATAATGGTTGCTATTTGGG  
GTTTTATTGGCCCGGAAGGCGCTGGCAAACTACTGCCATGACCTACTTCATGGAATATCAT  
ATGGCACTAGGGGGTGTTCAGATCCTTTCCGGGCTATACCTTGTATAGCCCTAAGGGCAA  
ATTGGTAAAAGACATCGATCTTAAAGAGCTTATGTTGATGTCTGGGGAGCTTAAAAATGTTG  
TTGTGGGAATTGACGAAATTCAACAATTCAATGACTCGTCCCGTCATATGACCACTATCAAC  
CAACTGACAGGCTATGTTGGCATGCAACGTCGCAAGCTTTCTCTCGGCATCTTTTATACTTG  
CAGAACTGGATGTGGCTGTATGACCGCATGCGTTGGTTAACTCATTTGTTAACAGTATGTTCT  
GATCTGCACTTCTCTCCCTGGGGTAAAGGAAAACCATATACGACAAGGGCAGTATATGTCTAT  
CGTCACTTACGATTGTAAGGGTTTTTGGACTGGCCAGCCATGGTCTCAATTATCTCCCATGGT  
ATTACGTCCTCAAGAACTTTGGCCTTATTATCGCTCTTATAACGTATTGGATATTTTCGAAGG  
TCAAGAGCGTATCCAGATCAAAAACGCCTGACCGTTTATGATCTTAATAAGGAGAACCCG  
ACCTTCGAACAAATTAGAGATGCGGCAGATCAAACACCTCCGGTCCGGATTAAAAACACCAC  
GAATGACTGATGATGAAATGGCAGTATATCAGCGCTTGGCTGACCAAGGTGTTGATATGAGT  
ACTATCCGCGAAGTTCAAAGAATGAAACAAGGAGTGTAATTATGACACCTGAAACTGCTCA  
AATTATTGCCGATGCCATTAATTCCTGGGAGCTGCTCTCGGGGACAGCTCTCGGTGACTCTAT  
GAGCGAAACAGTCAGCACAGCCATAAACGCGGGGTTTTTAAGCTTGGCGGCTACGTTAGTA  
AATGTATTGGTCATGATAGCTGTGGTAGCTGCGGCCTTTATCAAACATGATGCTTGGCTCTAT  
ATCCTGGCAGGAATTTCCGTCACGCTGTATGCCTGGGGACAAATGGACAGTGGCATTGCTGG  
GAATACTATATTGCAAAATTCTCCGTTAATTATGCTGGGTTTGTATCTAATCGTCTCGGCCGG  
AGTATATGCATTCCAAAGTCTCCAGTCGAAGCATCAAGATGGAGGTTAAATTATGGGTATAT

TATTAGGTCCCAATCAGGGGTCTGTAAATGGGCTGCTTCGGAACGGCCCCGCCTACACCCCCT  
AATAACCAGGTGGCCATTAATGCCGCCCGGCAAGCAGCTGAATCAGGTGTTAATAATATTAC  
CACAGTTAAGATGCAGGATGGCAAATGGACAATTACCACTGACGGAGCTGTGTATAACATC  
GATACAAACGGCCAAACAGCAGATACCGTGCAGTATATAACCAATTATCTGACTAGCCGCG  
GGGCATCTGCGGATATTATCAAATCAGTTACAGAGCAGATTCCCATTATCACGACACGGGAA  
TCTGGAAACGTCGTTAAGAAAAAACAGTGCAACTATCACAGATCCTAATGATACCACCA  
AGAAATACACTGCTGAACCTGTAAATGAACCAGCAAATGATTCTACCGGTGAAGGTGATAC  
TCAAATAACACCGATGTTTCGGTACAGTGGATAATTCTACGGCATGGACGTTTACTACCC  
CTAACGGCACAGTCTACACCGTGCCCATGGCGGGCTTAGCCTGGTCTGACCCTGCCAAAATG  
CATGAATATATAACAACTACCTGAACAGTATCGGCGCGCCCGCAAATGTCATCATGGAAG  
CTGTTAGCCGTATGCCGGATGTAATGGGGGATACTGGTTTAAGAGAACCCCGGACTGATGAG  
TTTGGTAACCTGATAGACAATACTCAAGAGATTAAGGATATTATCGCAGGCAGTGACCAGTC  
TCTAGCTTCTATAACTGCCTTAAAGGCATTCTTAGATGCCAAAGGCTTTTCCAACCTGTCTCC  
TGAAGAGCAATTCAATAAGGCGATTGAGTACGGTTTGATACCGACTGATTCTGTCTATGTAC  
CGCCTGATGCCGGTTATAACGTAGGTCAAACGCACCGCCCGGAATGCCTGATGATGTAGCC  
GTATCTTTGGGGCTACTGCCATCTAAAGAACAGATTGCATATAACGCCCCCAATTTTGACTG  
GGCGTACCTTAGAAAGGCAGATGCAGATCAGTACTTTGCCGAGCTAAAGGAAATCGTTGGC  
TATGACATTACCTCGGCTAACCTCAAACAGGCTATGCGTGAGGCTCAGAAAATAACTACCAG  
GCAAATCTACAGGCCAGCTCTGTAGCTATTGCCTTGAAACCTTTTATGCGTGGAGAAGGAG  
ATAATCAGACTATTGATATCTTCGCCGCCTATAAAGCAGGTATCCCGGATAGTGTTATGGAA  
AAGGCCGTTGGCATATCAAAGGCTGATTCTATCGACATTAAGTACATGCTGAAATACGTTGA  
TGATTCAGGCAATGTGGATATCCAGCAGGCTGTATCTGACGGCTGGGGGAAAGGTATCTTGC  
AGAAGTGGTTCGGGCTGTCTGATGCTGACTTTAAAAACGCTGAGTTTGCCTCTGATTACGAA  
GATGCAAACCTTCTTAGAGAAAATCGGCATGGCATACAAAAAAGACCCAGGTGAATTCTTAA  
AAAACGTGGGTATTTCTATGATACCTTTCTATGGTACATGGAAATTCAAAGATGATAACCCT  
GGTTGGTTAAATGCTACAAGTTTAGTTTTAGACTTAGCAATCTTTATACCTTTTGTCCGAGGT  
GTTTCCGCTTTAGCCAAAACCTGGTATTGGTGCAGGTAAAGCTATTGCCAAGGAAACACTTAT  
GACTACCCGTGGTTTAGTTATGGCACCTATTACAACCTGCTCTACATCCTATAGCTACCACTAA  
AGCCTTATTCTCACCTCTGGGGGTATTACTCAGTAAAGTTAAGGTGCCCTCAGCCATATTCTG  
GCGCGGAAATAGGAGTGAGGTGTTTGATATTGCTAAAATAATGGCTAATCCTGCCTCAGTCG  
AAACAACAAAAGCCATGGATAGAGCTTTGGTACTCAGAAATGAAGGTAAAGCATCTGGTTC  
GGTTCCGATTGTAGTTGACGGCACTGAAATAGGTAATCAAAATGGTCTGATGCTGGATTCC  
AAACGGTATTTCTAAATCCATGGGGCATTCTACCCCGTTTGGAGAGCCGTTTAAAGCTGGC  
ATGACAGTTGATAAAGAAGGGCTATATCTCTCCCCAATATGAATCTTGGTTTGACTAATGC  
TAGTGCATATGGTCGGGTACCCGGTTATGTCTTATAATAAAAACCTCTGGTTGGCTCTATTGG  
TGATGGGGGGAAACTGCTTGGGCAAATGGTAATGTCATAGGTAGAGTTGCTGACAATTCA  
CCCATCTTAAGGAATGGCAGTGATAAGAAGTTAGGAACACTGCTTTTTAAAGATGATAAGCC  
TTTCATCAATATCAATGGCCGAGATATAGAAATCAAATATACGATAGCGGCGTTGTTACTT  
ATGCGAATGAAAAACAGATCATTGGTTATTTACCACAGGGAACCTAAAGTATACGGAGAGGG  
CAAAGTTATAGTCGGGCAAATCAAAGAAACACCTACTTTCGCAATCATCCATAATAACGGGC  
TTTCGCGCCTGCCAAATGCAATTTAGATGTTAAGAATATGCAAGAAATGGAAACTAAAGCA  
TGGCAATACCTGAAAACCGACAAGGCAGTAGGCAAACTTATCCTGTATTTAAACAATATCT  
GGACTGGATAGAAGATGAAGCGGTAATGGCTAAAGGAAGCCGCATAATTCCCCTATTAGAC  
GATAAGGGCAAACCTGTTGTTTTGCGAACTGCTGGGCCAGATGGGCGGACTATCAGCGTCCC  
CTTACTCCAAGTAGTCACACCAGATTGGTTTTAAAAAAGTTTTAGAGATTACCAGAGCGCTTG  
CCGGCAAAGCGGACACTCTTAAACCCCGCCCGCTCTCCAGGTGATAAACAAGGTAGAATC  
ACTCCCAGAGGAATGGATGAGGACTTCATATCTTATATGCGCAAGAATCCTGATAATGTAC

TCTATGGCAGTACTGCTGAATATACATTCACCGGGGGCAGAAAGCCCGGAGACTTAGATATT  
CAGTCTCCTACCCCGGAAAAGACAGCCAGTGATATTGCTGATATAGCCCGCCGCTATACTGC  
AAATGAGGTA AAAAGTAACTAAAGTGGCCACCCACTATACAGTATCTCAGCTTAAAAATGGG  
TTGTGGAAAAATATCGCTGACATATCTGAATTAGGATGGAAGAACTCGATGCCGGGTTTAA  
AAGGCTGAATGCACCTATCAATACAGTAAAGGTAGAAGGCATTACGATGGAAGCGCCTAGT  
ACTCAGCTTTATAGCCTACTAAACCGAACTGTATCCAACCTTGAAAAACAGGACCGTTTTAC  
GGCTATGGTAAGCAA ACTGGGAGGCGAACTTGATTTGGGCATTGGAGCCAAAGCCCCCTCTC  
TGGCAGATTTGTATAAACTAAAGGCCAAGGGCGTCTACAATACTGTCCGGGATATCTTTGTG  
CCAAATCTGAAAAAGAAAATCAATTATGAAGCCTTGGCTAAGTCTAACCCGGAGCTGGCCG  
GTAAGATTGAAAAGGTCTTTGCCTCCGAAGCGGATACTCAAAAAGCTTTACTGACTACGATA  
CGGGAGAAATCCCCAAAATTGGCTGATAAACTGGAAGATTTGCTTGCTGAACGGAATATGTC  
AAATGCAGCCCGCTTGGAAGCTGCCCGCAAATAGCACCGGATTTAATACCTGAAATAAAG  
GAGTTGCTGCGTGCTGAACAACGGTCTATGTCTGCCGCCCGTATGGCCGCCATGACGGCCGG  
AAGGGATGGACGCGCCAGTGCCATAGTAATAGCCGGCAGACTGGCAAAGTGGCAGCAATG  
GAGAAAGCCCGCCTTGAAGAGGAGATAAACC GCCGTGCCAAGCTGATAGAAAAAGAACTAC  
GTAAATTACCGGCACGTATGCCGGGTGTTGGTAATATGAGCAAAACCAGAATTACCGCTACA  
ACACTGGAACGGAACTGCGCACCGGTGGGGGCGATTATGCCAGCCTGCGCAGCCGGATAC  
CGCCATCCAGAGGGGAAAGAGTCCCACCGCCGAGAGTTCCTACCCTTAATCCGCCGGATAAT  
CCGCCTCCTAGGGTTCGATCCTCCGCGCATTACCCCGCCAGATTTTAACTACAAACGAGAGAA  
GGGCAGAAATGACAGCGAGGAAACCTCACTTAATGCCCGTCCAAAACCTTAAAAATGGGGAT  
GTAGCCTGGAAACAAGGCGAACTGGGTGCTGGTGATGATAAACGCCCTGTTTGGATAATAA  
AACGTGCCAATGGCACTCATGAATATGTTTTCCAGCCACCGGAAGGGGCAACCCGATTGGA  
AGGCACACCTAAGGAAACATTTCTTTACGCGGGGTAAAAAACCGCCTACCAATCTGACCCAG  
CAAATGGGAGTTACTACAGCTAAGATAAATTTGAAGGATAATCCGGAGATAAGGTTTGTCC  
AGACTAAAGCGCCTAAATTTAAACCATACATCCCAAAGAGTGTCCGGCGGTCTATAGGCATG  
TGACAAAGTGTCAAAATATTCCCAGATATGCGAAAGGCCGAGTGTTTTACTCGGCCTCTTA  
GGTTCTATTATTCTTACCTCTTAGCATTTTAAAACCTCCCTGACTCTTTAGGCACGACTGAAA  
ATAGCATGCTTATATCTGATTGGGCAATTAATAACCTTCTCTAAAGACATTGGCACATGTTT  
CCATTTCTTTCATTGTCAATTTCTGGCATTCTCCGTCTCTGATACAAATATATAAGCCCTCTAT  
ATATTCCTTGGTTGCATTAGCTTCTAGCCATGCCCTAGGGTTTTTAGCAAACCCCTTCTCTAA  
TATCTCTCCTACACCAATCGTCCAAAGCATAGACTCTAGCAGGTCTTTTCTTACTTTATCTTCT  
GGCTGGTAATAAACAGTAAATCCTCTTCCATGTCCAGTGCCATATTCTTTACTCCTATTTAC  
AGTATTTAATATCTTTTATCAGACTTTACACGTTTTAATGCGGTTTGTCAATAACATAGTATT  
GTAAAATAATGAAAATAATTGTAATACTACTATGAAATCTTTAAAAGAGCATCGGTTAGA  
AAAGCTCATAACTCAAACAGAATTAGCAAATTAGCTAAAATTAGTAGAGTGTGAGTGCAGTGAGC  
CAAATTGAAAAAGGCCAGCAGAAACCATCCGAGTAACTATCCGTAAGCTAGCTAAAGCTC  
TTGATGTAAAACCAGCGGATATTGAATTTAATGAAATTTGAATGGGATACTCGAACCCAGAA  
CATGGGTCCGATATTTATTTATTTTTGGTGGTTTTTTTTGCTTTAGTAATTAATCTATTCGAAAC  
TCCATGGTTTTATATTCCGTTCTTTGGAATTGGTATTGCTCTTATCGCATACAATCTTATTCGC  
TATGGCCAGCTCCGGGACTATTACTGGCTATGGTGCATGGAAACAGACGAATTCTTTGGCCC  
ATTCAATAACGATATTGAAATGAAGCTATTCCAGCCCCCGCATTATCTGCCTGGTGGCTGGC  
AAATCTTTTGGATACCGGCTAAGGACCCTCTCAAAGCTACCATAATCATCCGCAAGTGGGTC  
AGAGACGCTGAGAAAGTTTTGCGTAAAGACCCAGAATATAAAGACAGAATGCCTAGGTAGG  
AGGAATATTCTTATAACAAAATGATATAATTTACAGTACATGTAGTTCAATTAAGAGTGCTT  
TAGGGAGAGATAGTTACAATGAATGAAAGTAATCAATTAGAACCAGATACCAGAAGGCGAAA  
TCCAAATATCTCTATTTAAAACAAAGAGATCCGAAGAGTATTGCATGACGGCGAATGGTTT  
TTCTCCGTGGTGGATATAATAGAAGCTATAACAGATTCTATCAGGCCACGACAATATTGGAC

TGACCTTAAATCTAAGATAATCAAAGAAGGCGCAAATGAACTGTACGAAAATATCGTACAG  
TTAAAAATGCCTGCTTCAGATGGTAAAGAGCGAGATACGGACGCAGCAGATGCAGAAACAG  
TCTTCCGAATTATACAATCTATCCCTTCACCAAAAAGCAGAGCCCTTTAAGAGATGGCTAGCT  
AAAACAGCGTATGATCGTATTGAAGAATTCCAAAATCCTGAGATAGCCATCAAACGAGCTA  
TACTTGATTACCAAATAACAAGGCAGAACAGATGAATGGATAAAGGCGCGCATTTCGAACTCT  
GACTAGCCGTAATGAATTAAGTACGAATGGCAAAAACGAGGCATAGCAGGTGCGGAGTAC  
GGCATTCTCACTAATGTAATATCAAAGAGACTTTTGATATAGATACAACAGAACACAAGG  
AAATCAAGGGGCTTGCAAAAAGACATAACCTCAGAGATCATATGACTGATATGGAACCTTAT  
CTTAACGATGCTTGGGGAAACATCAACAGCCGAACTTGCGAGATCGAGGGATGCTAAGGGT  
TTTCAAGAAAATGAGCAGGCAGCTCATGCAGGTGGGAGAATTGCAGGAGACACAAGAAGG  
AATTTGAAAAGCAATTAGGGGAATCGGTCTCTCTAAAAACAATTTCTTGCCCAAACATCC  
CGATCAGCCAAAATTAGAGGAAGGATAATTATACATACCAAGGCAAAAATATTTTTATAGCT  
TCAGGTATCAACCGGACTAACTTCTTATGCCCTTGAACAGCTACCTCAGAATTCAAACTG  
GCAGCGTATTTTCTAGTTTGCCTCAGAGTGTATGCCCCATAAGAGATTGAACTTCAAACCTC  
CCCTGCCCATTCGTAAGCACATAGTAGCGAAGGTGTGCCTGAATGTATGAGGGCTGCACC  
GGATATTTGTAATCCCTGCCCGCTTTCCTAATACGACGATTGTCTGCATGATGCCATTTTTAG  
TTAAAGGGTGGCACTCTTTATCACTATAGCGAGTCTTGTGACGGCTAACCCAAACATCAGGG  
GTTTTATCTCCGGGAATGACTGGATTTTAAGATACTGATATTCCAGTAATGCCCTCTGAACT  
TTAGGGCCTATGCGTACAATCCTCTCCTTAGCTCCTTTGCCATAACCTTAACCAATTCATA  
TCATAATTGATATCACTCCACTTCAGCTCTGTGCATTCCCTCAGTCTGAGGCCTGTATCCAGC  
ACAACAGAATAAGTGCTTTATTCCTTTTATCTTCGAATGTTTCGCCGGACACTAAAGCCAG  
CAACCGCTGACAATGCTCTTGAGTGAACGGCTGAATAACTTTGCGGGGTACTTTAGGCAGAC  
GTACCTGTTTTAACGGATCTACTGTAATTTGCCATTGTCCTTGAGCCAGTTAATAAATGGGC  
GAATTTGCTTGAAGTAATCAGTAACGGATTGTGGGCCGTTGGTCAGCTGTAACCTGTTGTAGA  
AATAAACCGAGGTGTATTGAGGTAATCTGCGCCGGCTTAGTAACGCCATGTTCCCTGGCAAAA  
ATCAACAACTTGCCGCACATATATCTGTAATTTGAAATTGTTGCGGGGCTCAGCTGCCCTA  
CTTTGGCCATAAGAAGATAGGTGGAAAGACACAATCTGAGGTCATCAGGTGTAGTCAAAG  
GTCACTAGCTACGATTGGGTAATCGTAAGAATTTTTGTGAGTTAAACGGTCATTCATGCGCC  
ATTTGAGCTACCGACAGCGCTTTTAGCTTTATGGTGGAGCCGGAGGGATTTCGAACCCTCTA  
CCTTTTACTGCCAGTCAAACGTTCTCCCAAGTGAACCTACGGCCCCAGCAACAGATAGATAA  
TCTATCATAAAT

>Dmc\_IME1-8

TGCAGACCAAAGGAATGAGGCAAGGCTCTTTTCGAGATTATTTTCGGCAGTTAACAGGTAG  
CTCGCTATATTGGAGCAATCGTGGGATTTTTGAGTAGACAAACGGTAGCTCATACTTCATTTT  
TGGCTACCGGACTGCTTTTTAGCTTTATGGTGGAGCCGGAGGGATTTCGAACCCTCTACCTTTT  
GACTGCCAGTCATCAAAGCTAAAACCAAGCACCACGATTACCTATCGGCCTACTCTACTTCT  
CCTTAATAAACTAGTTTTTTTATTGACTTCGATGACTACTGCACTTGCCCTGGCATTCTTCTAAA  
GAATGAAGCCCATGTCCATTTTTTAAATATAATCTTCCATCTTGCTCTATTAATTTTCTACA  
ATAACCTCTCCATCCACTACACAAAGGACTATATCCCCTTTTTTGGGGGCTCGGTCTCGGTCT  
ATAAGGACAATATCTTTCTCACTTATAATCGGCTCCATAACAATTCGCCGCTACTTTGTAAGCC  
TCTATATTTGGAGGAGCATTACTTTCCCTTGCTCTGTATATGTAATCAATTGGTGCTAACGCT  
GGATCTCCAGCATGTACGATAAAATTATCATAACAGGTATAGAAACAGGAGCCATAAGTT  
GATATTTTCTTAGTACTTCTTTCAGGTGACTCTATCCTAACTGTTTCAGGATATGATTTGAACT  
CTTTGATATCAACACCAAGCGCTCGTGCAATTTTAGATAATGACTCATAACTTGGCATAAGTA  
CTTTTACGCAGTTCAAGCATCGAGATATAACCGCGAGTTAAACCACTTATTTACGCTAATTTA  
GCTTGTGTAATTCCACGCGCTAGTCTTAACTGTTTTACTTTTTAATCCTATTTGGATATCCATAA

TACCCCTCTGAAACAATAGTATCATAACTTGACCAGTATTTGCATGATATTGATAGGAAAAT  
GGAGATAATAAGCAATGTACAATACTTTAGCATGTTGCTACTATGGTATTATTCGTTCTAACT  
ATCTCTCTACGCCTTTGACTCTCTGCACATACTAATGCAACAATAGTTGTCATGAATAACATC  
ACTGTCGCAATTAATCTTCTAGATGTCTTAATCAATTTACAGAAGGATATGAAACTAAGTAA  
TACAGCTTTTTCGAAAAAGCTTGGCATTAAATCGCCAGTTGTGGCAAATGACTAAATCAGGTA  
CTAGACCTATACACCTAACAGTACTTAAAGCCATTATCCGGAACCTCCCCCATCTAATCCCA  
AATGTAATAGTCCATATGGGCACTAAGGATATCAATGAAACTGACTAAGCGCGACTCTGGA  
CGTATTGGGGGAATTCAAACCGCAATGCGCCATGGAACTAATCACATGAGGGAGATTGGCA  
AACTAGGAGGCGGTCCCCGGGCTACTAACTGGATGGATTTACAGGTGTTACACATCAGAGA  
GAGAAAAGAGAGGGAAGGAAGAGCTACCGACAGCCTTACACTATCTCAGTTAAAGCACCTT  
GTGAAAAATGCAATGGAGGGTGGCTACTAGTCCTAGCCTACCCTCCAGAAAGGGGAATGAG  
GCAATGCCTCAACAACAAGTAACCTATCGTATCAAGAACGAACGCACCGGTCAATGGTGGG  
AGGGAAAGGCTGATAGCCCGATAGATGCCATGCGGAAAGCCTCCCTCGAATACCCGGTAAA  
AAGCCCTAGTACCGGCTGGACAGCTGAAAACCTGCTGGGTACGTCAATGGTGTCTGCTGGTT  
ATGGCTCATGGGTAACCCAGACTATGTCCGCAAAAACAACAGAGATGGTGAAGCATGAAA  
TTTTTTCCACGTGCTTACCGCGTAGCTAAAGGAGAAATAATATGCCTTATAAAAAGATATTTCC  
CGGCCAAGATAGTAAGTTTTGACCCTTATTTTGGAAATGGAACGTGATGGTCTTAAGTCATTT  
ATTATCGTCACAGCATTCTTCTATGGATGCACCGGGCAATCTATTGTTGGATGAATTTAGAA  
GTCAGAAAGTCCCTATACTGATAACAATCCATAATCCCCAAACCTGTCAATCATTTAATGCCT  
ACGCAACCAAAGTTGTGCAAAATTCTCCCGCCCGTTACTGGAATACCATCCATATCGACATA  
GAACGCATACTCAGAGCAGAAGAAACGCCAACAGCTATGGCAAGCTACCCCAAAAAGGATG  
ACCTTAATGACTAGTGGAAATGGTTATCTTGGCTGAGATACGTACCGAGACTGAACAAGGCCG  
TCCCGCCCCTACCACGGGCTGGGAATGGAGTCCGGGCTGTACCCCGCTCAGAGACCCTTCCC  
CTGGCAAATGGATTGTTTCGGCGCACAGCAGACAGCTTTGATGTGATGTTCCGCTCATATTTG  
ACTCCTGAACACTACGCAGCGGTGGCCCTGAATACTGGATAGGCAGTTTTAAACCCTACTGATAC  
GGGGGAATATGTAGCCCGTGAAATGGCAATCAAACACTACGTAATGAATCATACCGACAGGAG  
GCTGAACGCAATGGCCACAACACTACGTATCTAAACCAATTGAATTGTCCCCCGCCGCTACC  
GCAAAGGTAATTATATGTTCTGCCAGTAAAAGCTGACCGCAATTACAAGTGCCCGGAGTGT  
GGTTGTCTGGTACAGCCAGGGGAAGTTGGATTTACCCGCTTTAAGATTATTCATGATCTGGT  
AACTGAGCCTGTCTGGGATGTACTGCATGCGTGCTGTGTAGAGGCAAGGGAATGATAAGAA  
TTAAAATTGGTCATCTAACGCTCTCTGCGGACCTATCTCAATCCGGAGATGTAATTATTACCT  
TGAGGACTGAAGATGGCACACCTGTTGCTGCCGCCAACTCAAAGACACTTATTGCCGCTATT  
GAGGCACTGGAGAAGACAGCGGAATAACATCCAGGACGGACAGGGGAGTGTGATCTCCCTC  
CCACTTCCCTGTCCGTCCTTAAAAAACACAAAGGAGTGACATATGGTTCGTATCAACACTGAG  
TAAGAGACCAATTCTGCAAACCTACCCTTGTACCCACTGCGGCCGGGAGACCGAATGGGATT  
TTGACCTGGGCTCCAATCCACTATGCGCATACTGTTGGGACAACAGTATAGAAATAACCGTC  
AAGGTTGAGCTGGCTGATAAGATGCGTGCCTACCGCCAGGAGCATAAGGTTGAGCTGGCTG  
ATAAGATGCGTGCCTACTACCAGGAGCATAAGGTTGAGCTGGCTGATAAGAAGCGTGCCCG  
TTCGGCTATTTCCAATTAAGTCTGAAATGAGGTCCAATATGGTAATAGCAATACGAAAA  
TATACGATAGACGATATCCTTGCCCGACTTCAGGGCGTCAAAAAGAATGGATCCGGCTACAT  
GGCCTGCTGTCTGCCCATGAGGATAAAAACCCGTCACTATCAGTATGCGAAAAGAGTGGC  
AAGATTTTGATCAAAATGCTTTGCCGGATGTAGCTATGAGACGATCATGTCCGCGTTGGATAT  
GCCTGTTAATGATGCAATGCCCAAACTGCCAAGCCATCCAAACGCGAGATAAAGCAGACC  
TATGACTACACAGACAGAAGCGGCCAGTTGATATTCCAGGTAGTCAGGTTTGAGCCCAAAA  
GTTTCTCCAGCGACACCCTGGCGGCAAGACCGGCTGGGTCTGGAATATGAAGGATATCGA  
GCCGTTATCTATCATCTGCCAGACGTGCTGGAAGCGGTAAAAACAGGCCAGACTATTTGGA  
TAACCGAGGGCGAGAAGGATGCTGATAACGCCAGGGCTATGGGCTTGGTGGCCACAACCTC

CCCGATGGGGGCCGGCAAGTGGCGCGATAATTATACTAATGACCTGCTGGGAGCCTCTCAA  
GTAGTAGTGATTGCTGATAAAGACGCTCCGGGCGTAAACATGCCTCTGATATTGCCATGTC  
CTGCCGGCGGCAACGGTACCGGTCAAATTATAGAGGTACCCGGCAATGCCAAGGATTTT  
ACCGAGTGGCTGGAAGCCGGCGGCCAGATATCCGAGCTGGATGACCTGGTAGCTCAGTCAA  
AGAGTTACACACCGTCAAAAAACCAGAGCTTATACTTTCTGTCTGATGGCAAGTTCAGTATT  
GAAGCCGGCCGGATTATTTATCATTCTATAGGGACAACATCCCTTACGATGCTCCGCTGTG  
CAATTTTGTAGCAGCTGTTAAAGAGGAGATCATCAAAGACAATGGCATAACCCGCAAACT  
TTCTTCAGGATTGGAGGTACAGACTGTACTGGCCGCCGTTTCCAGATATCGAAGTACCCAG  
TGAAAACTTTTCTCTATGTCTGGGCATTATCCCAATGGGGAATTAAGGCTATGATCGAAC  
CCAGCCCTTCAGCTGAACGGCTATTACGTGGGGCGATGCAGTACATGTGATGGAGGCACCC  
TGCCGGATTATTTATGAAAATACCGGCTGGACTAATATCAACGGTAAGGATGTTTACCTTAC  
TCCCACGGTGCATCGGTGCCGATAATGTTGAAGTGGAAATGCCATCCAATATCAGCCATT  
ACGATATACCCTCGCCGAACAGAATGACGATGTGAAGTCCTTTATCGAAGCCAGCTTTAAT  
TTCCTCAAAGTAGCCAAGTTATATATTACCTTACCTCTGTTTGCAGCTATGTACATGACGCCT  
TTATCAGACGCCATTGATACTAACTTCAACCTCTGGCTGATTGCTGGATCCGGCAGTCTAAA  
GACCACCATAACATCACTGGCTCTTTGTCACTACGGAGATTTTGACTATACCTGTGTGCCGGC  
TGCTTGGCGGGATACTCAGAATACTGGAACGCATCCTGTTTACCTGCAAGGATATGCCAG  
TATTAGTGGATGACTGGTCACCCGGCCAGACCACCGCCTCACAAAAAGAATTTGACGCTAAG  
GCTGACTATGTATGTCGCGGACAGGCTAACAGACAAGGCCGTAAGCGCATGTCTGCCGATA  
CATCTATGCGGCAGGAATACGTACCGCGAGGCTTTCTGATATCCACCTCGGAAGGGCAACCG  
CCAGGCGAGAGCAATAATGCCCGTTTTCTGATCATTGAAATGTCAAAAACAGATATCGAATT  
CCCTTGTCTTACCCTATCACAGAAAGAGGACCATCTGTACCGCCGCGCTATGGCTCATTACCT  
GGCATGGCTGCAAGCGGACTGGCCGGCGAAGAAAGTGTATCTGCGCCAGCGCTACCAAGAG  
GTTTTTGAACAATTTACTGAGAGTCTCCGGGGTGAAAATGTGCATCTCCGGCTACCCAGATC  
CATCGCTCTGTTATATATCGGTCTGGAAATGGCTATTCGCTGGGCCGAAGAAAACGGAGCAG  
CGGATATATTTGATAGGTTTATAGATGAAAGCGGAAACGGGGAGAATGATTCAGTCGGGTC  
TGCGTATCTCTTAAAAAAGCCCGCGAAGTATTTATTGAGATGGCCAAGCGACAGGGTGCC  
GGATAGATGAGGCTACACCATCGAAAAAGTTTGTAAACGCCTTAAATGCAGCCCTTATAGCT  
GGTACTGCATATCTGGATGTTAAAGATGGGGCAAATCCTCGGTCTGCTTACCTGGGCAAAC  
TCTGATCGGTTGGGATGACCGGACTAACGGGCACGTTTCCCTCCATAATGACCTGGCCTACC  
AAGTAGCCAACCAGCATTACCAAAAAATCAATGAGGCTTTTGTAAAAAAGGATGCTGTATTT  
ATGGATCTGGTGAAGCGTGGTTATGTGGATCCGGGTAAAGATGGTAAAACCACTGTCTTTGA  
GTATATCCCGTAATAGCAAAGGCATGCCGTGTCCTACATATCAAACGTGAATTTGGGGC  
GGGATGAACAAAAGAGAGGTGAGTAAAACAATGAAAAAATGTGTGTGCGCCCCAAAATAT  
CCCATGTATTA AAAAATGGTGCAAGAAGTGCAAGAAAACCTGTTTTTAATCGTAAGCCAAA  
ATATTCTGAACGTGAAATTTCTTGCACCTTGAGGGTGCAAGAGGGTGCAAGAAGTGCAATAC  
AGGTGCAATACAGGTGCAAGAGAAGTGCAAGAAAATATAAAGCTAAATTA AAAAATAGGTGC  
AAGAGAAGTGCAAGAAAATATTAAGCTAAATTA AAAAATACATACTCGTAATTGTCAATAT  
TTCTTGCACCTCAAAAACAATATATATCACTCAGTTTTAGGGTGACACATAAATCGGTATGT  
AAGATTGTTAAATCATTCTCAAAGGATGTGACATAAATGAAAGTCGCGTTATATGCCAGGGT  
AAGCACCCGCGATAAAAATCAGGATCCGGAAGTCCAACCTGATGGAGCTGCGGAAATATTGC  
CAGGAAAACGGCATGGAAATAACCAGGGAATATATAGATCATGCCTCGGCCAATGATTTCCG  
TCCGCAGGACGGCATGGAAACAGTTGTTAGTGGATGCATCTGCCCCGAAAGTTTCGGGGGTTA  
CTGGTGTGGAAACTTGACCGGGCATTCCGCGACATTACGGTGGCCACCTCGTCCGTTAAAAT  
GCTGCGCAATGCCGGCATAGATTTTATTGTTACCACTGTCCCTGTTCTTTT CAGTCCAAGGTCC  
AGCTGGAGACCTGATGTTTAAACATCTATGCCGCTTTTGCCAGTTTGAAAAGGACACCATTA  
TTGAAAGAGTTAATGCCGGACTTCAAGGGCAAAGGCTAAGGGTAAGGCATTCGGTCGCC



AAGAAAGGCAATAGACTTCAATAAGGTTTTGGAAGCCCACGAGATAGCCTGCTCACGGGTT  
AACCGGATTACTAAAGAAAATCAGGGTTATTCCGAGACGGCGAGGATATTGAGCGAGCAGA  
CCGGGCTAAGAATTACAGCCGGTTGGGTCTATAACCGGCTTAAGGCCGGCAATTAATAATGCT  
TCAAAAACCCACCCCATTTTTGCATAAATTTTAAAGCCAAAATCTTATCGGATGGGAGG  
CTTCAAAAATAAATGTTTTTTGAAGATGTTGAGCTACTAACTTGATACCCATTATTCAAAG  
AAAGTCCAATTTGAAAGGAATGGCAAATAAATGAGACATCTTAAGGCGGTATGGCAAGGCG  
GTTTATTTATTGAAGGATTACGTCCGAAAATAGATTACACGAAAGCCCCGGAACACATCAT  
TTAATAGTCACAAAGGCGAGCCCCAATTTGATGACCAGAACCTTATCGGTAAAAGAGTAG  
CAATCCCAGTTTGTGGACCTATGTATTGGGAAGTTATGGAATAAGCGCAAAAAAACGGCAA  
AAATAATGCCCTGCTTAGTGGTTTATTTCAAAGGTAATTGTGCTAAACCGTAAGACCCCAA  
AATTCACAATTGTAAAAACACTGTCCTATCTGACTAAAAATATACTAAGGGAAAGGAAAC  
GAGATGAAAACCGTATTAATAAATCAAGGGCATCACCCATTATTAATGCACAGATTCCC  
GATGGCGGGCGCAGACGATACATCAAACGACGTAAGTGGTGTACCGGATTGGAAGGCAGAG  
GCAGAACTAGCGTTATACAAAGATGATCATGGCCAAATCTATCAGCCAGCGAGCCATATTG  
AAGCTTCGCTTAAAGAGGGCCAGTAAAACACTAAAAATACCAGGCAAACGAGGGGCGACCTA  
TTCAAACACTCATTGGTTCCGCTGTCTCTGTTTCCCCTGATGCTATCACTCATTTAATACAGAA  
TTACGAAACAGATAGCCGTCTGTTGTGATACAGAAAGCACGGATAGTACGCTACAGGCCA  
ATATTTAAGGAGTGGGAATTGGAATTTGAAATCAATATTGGAGATGAACAAATCCCTATAGA  
GGTTATCAAACAGGCTCTCGATCATGCAGGGCTATATGTAGGTATAGGCGATTTTCGCCCCAG  
GACGTGGAGGAAAATTCGGCAAATTCATGGTTGTCAGATTTGAAGAGAAATAATATAGTCC  
GTAGCCCTGCGGGTTAGTCAGGTGAGGTATGGCTCGGCTTGGTTGGGCGTGGTATGGTCAGG  
TACGGTTAGGCACGGTATGGCAGGGTAAGGTTTTTAAAAATTACACGAGAGGAAATACTCA  
AATCTGATCTTGAATCGGGAGTTAAAGAAAACCTTCTTACAGCTGTTGGGAATAAACACAAAC  
AAAGAGTAATTAGGAGAGGGCGAAATGGTTACTGAAACGAAAGGGATATACGAATTCAGCC  
TGGCTGTAGATGCCATGACCTTGGGCCAGCTGGGCCAGGAACTGGATAAATGCAGCCAAGA  
ACTGGGGGGCTGTGAATATTGCTCACAACAGGCTATCTGTTTGGATCTATGGCTGCACCTGG  
CAGATACGGTAAAGGATGATTGTGCGTTAACTGCCCCGGCAGTACACTGTATATGCTCTAGAT  
TTTAAAAATATTAAGGCCCGACGGCAGATGATCCTGCCGTTGCTTATCGCCTAAGCGCCGAA  
TAAAGACCCCAGACAGTACCCGCACTAATAGGGAACAGGAAAAACCATTTAACAAGTCCGG  
CTGTACCTTCAAGGAATGAGTAATTCCAGAATAGTAAGCGTGGTATCGCATAACGTAATAAAC  
CCATAAATACCACCTACCACATTAACAACCGTAACGAACAAATTACCGATGGCACTATCTGA  
ATACTGCATAACCGAAAACCCAAGCAGGGCATTGAAAAATGACTGTTCTGGGTCTCCAAGC  
CAAGTCCCCTCAAATATCAGGCACATTACTTGACCTATGATATAGCTATAAACAATCCATAC  
CAGCCATTGCGGTCTCATTAGTAACTCGCCAACTTTTCGATTTGTCAATTCACCGATAATCACC  
ACTGCAACAGGTACCAATACCCACCATGGCACACCTATAGTCGCGCACCAGAAGACTTGCC  
AAATGAGCCCTGCAACTGCACAGGGTAGTAATTTACGCGTTAAACCAAATGATAGGATAGT  
AATTATGGCCCCGCCGCAAAGCTAGGCTAAGCCAGAGAAATGCAGATGGGAAATTCATC  
TCTTCCAGAAAATCTGTAATCTGCTGGCCACCGGGCAGGTTTTCCGGATGCAGATTGACATA  
CCACCCGGTTCGGCATAAGTACCCAGATCATCGTCTGTCACAATCTCAACCGCATCTTCGTCATC  
TCCCACAATGAAGGCTGACTGGTTGCAGGCAGCATAATTAATCACGGCCACGCTCACATCTG  
CGTCAGTGGTTGTTATCCGGAATGAGGGCGTGGCATCATTACTATTCCCGGATAGATCCGTA  
AATGTAGTGGCGTATTGCCATTCACGAGCCTTTAATAACCCACCAACCGTTATTTTTGCA  
TAGTATAAATACGGCATTGATCCGTTCTGGGTAAGTACCAGTCATTGACATTATCAATTAT  
AGAGCCAGCATAAGCGGCTGAGCCCTCTAAGAGACCATCTATATAGATATTCATCGTGCCTG  
CAGATAAAGATATCTTATATACATGTTCTGAACTGGATATATCCGCCCGCGTAACGATTGTA  
TTATTTGCATTTCCCTGTTATTGATATATTTATGTCTGTTGTAGCAGTGCCACTCCAACCTAGACC  
CTGAATTATTTGTAGTGCAGTATCTGCCGTTAGCATAACGGATTAGTAGGGTTATACCAGTGA

GTAAATTTATTACTGGAGTCCCCGTTTGGGAGTGACAAGACTATTGCATAACGTGTTCCGGC  
AGTTAGATTAATTATATTGGAAAAATCAAATGTATGATTTACAGCAGAAGTTGAGATAGTTG  
AAGCTACCACCGAACCGCTAACCAAGGCACTTCCTGTTGGCACATCGCCGCTAGTTGCATAG  
ATGGCATAATTAATAATTTCCAGTTGGATTGCCTACTCGTTGTGTTCTAAAGGTAAATTGGTTG  
ACAGCCACATCATTAGAAAATTGAAAGGTCTGTGCTATCCAGTTAGCACCGTACATAGATGT  
AGCTGAATATGCAGTACCATTATATGGAGTTTCTGTATAACTTGATGAATTACCTGCCGATA  
CATCTGTTCCAGACGTATAAATCCAGAATGCTCCAAATTTAGATAGGTTATAGCCATCATT  
AATCTACCACTTAACTCAATCTCAAATCATTTCCAAGCTCAAGTGTGCGGAATCAACAAC  
GCTCATACCGGCTGTGCCCGGAAATAGGCCAGTTTGCCCCCATGGCAGTTTCGCCGCCGG  
TATAGAGGTTGTAGTTAATAGCGGAGTTCTGGCTGATCTGCTCAACCCACATCATCCAGGGG  
TTGCTGCCATAACCTGGCATAAAGGGTATATCCAACCCGCCGGAGTCTCTAAGTGCCAGATT  
AGAAAAGTCCGGATCTATATAATAACCATCCAGCAGGCTCTGGGAAGACCAGATAAATGGC  
ACAGATACCTGCTGGGCGGTATAGCTGGCATTGTGGCCCGGATATCCGCCATATAGATAGC  
ATCCGTAATAGTTGAGGCCATGATCGGTACAGCCCCTGTAATGGCCACCAGGATAAAAGGA  
ATAACAGATACCAATAATTTCTTCATGCGTGCCTTCCCATAAAGACATAACCGGTGTA  
GCGTAAATAATGGTAATAATCGCTAGGATAACCCCGTTAAATAATCCCATGGCCGTACCACC  
GGCCAAGATATAGGAACCGGCTATCATAGCCGATTGATTATCCGAGTATTTAAATTGTGACC  
AGCCAAATAAACTACTACTAGAATCAGACAAAGCAAAGTGGTAAGTATCTGCCAGCTGAC  
AGCGTTATTAATATATCAGCCAAACCTGTTAGGGCATCACCCACCACAGTGCCATTCCATT  
GTTCTGCCAGGTTAGTAAGCATATCAGTGCCCATGTCTTCTAGTAAGGTCTAACCCCTGTG  
CTTGGGTGGAATATATCTTGGGGCACATAGTCTGTAATCCGGGGATGGTTCCATTACCATAA  
GCAGCTCCGTAGTCATTAATACCGTCCCCTGGTTGGTTTCGGTCAGTAATTTAACTGACCAG  
TTGATCTCTAGAGTCCGGCAGACTTCTATAATCCAATTACCCATCAGGGATTGATTTTCTTTC  
TTAGTAGATAATTGGCTGTAATCGGAGCCAGTCATAGTGTAGTTAACTTCCGGAGGCGTCAC  
CCAATACTGAGGGTTCCCCACCATTTTGTAGTACCAGAGCATCCTCCCAAGTGGGAGCATCAG  
CAACTGCAAAATAGAAGGCTGAATACCCCATGTCATAACCGGCGTTGTTATAGGCATAAGG  
CTCAACCGCTCCCAGCTGGGTAACGCCATCTGTATCCATAAGGCCGAAAATGAAAGAGCTTGT  
TGGCTGGAGTAGTTGGCTGCCCTGATGAATAGGCAATAGTGTACTTGAATGCTATCAGGGTA  
TCACCCGTCTCAACAATGTTATGGACCGCTTGAACATCATCCAGGGTATAAGTAGTTGGAGT  
AGCAGGGTCAACAGCCAATACCGGAGCAGCAGTAAATAGCGATAGTATTATGGCTATTACT  
GTTGCGAGGGCTGTTTCGGCTAAAGACCTTCGTATATCTTCTGCGCATCTCTTTATCACCATGA  
ACGACAGGGGGTCACGGGGAAGGCATCGACCACGCCTCCAGTTAAGCAATGTATTCCCTGTG  
TACCCAGCAGGTTTTGCAAGTGCCTGGTACTGCGATGCCAGTGCGAAAGGATAAGTTCTA  
TATCATCTCTAAAGCCTGAGATATCTCCATAGCTACACCTACCACTGTTAGCCTGATCGGT  
TTACCCTTTCTGTGTTATCTCCATGCTCTAAGTCTACCGACCTCTCAAATTAAGTAAAGGCA  
ATTCAGGTGTTTAAGGTATTTATATTAATTATTCATATACCCTCAGTGATTTTCGCACAATACG  
TTGTGCGAATTGGGAATTTAACTGGTTTATTATTCATCTCAAAGCCAAGTTTGACTGAAAGG  
AGGTGAATAATTTGAAAGTATTTGGTGCCTTGCAGGCTATATTTGGAGTCATCCTCCTGTTTA  
ACTTCATGCCAAATCTGACTAACTCTACCCATGATCTACAAACGGATGCGGCTACCCAAGCT  
TTTCTGCCGTGACTACTGGAGCCGGTGAGACAGCTGCTGATGTAGTACTAACTACAGATCC  
TTACCAGGACCGCACTACATCAATAACCGGTATTACATCGGACAATGTATTGGATGTTAACC  
CACTGGTTGCCGCCACTTATACCACCGCTACCAATACCCTACATGTCACGGGTCTGGTAGCT  
AGTCAATCACGAACCTGACCATCGCTTATGAGACTGACGCCCTATCGGACTTTACCATGAT  
GGGCACAATCGTTGGTTGGACACCGGTTTTGATTGTAATAGCCGTTTTAGCAGTTATTGGCG  
GCACAATCATGGCTCTGATTCCTCGGAGAGCATAATCTCAACATTTTAAACAATTAGTAAA  
GAAAGGAGGTGAATTGAAGTGAGTAGAATGTTAAATATTGGTGGCGCCATACTCGGAATCA  
TAGTTTTGGCTGCCTTTTTCCCCGAAATGACCGCAGCTCTTCAAACGCTGATGACCGATGCCA

ATATTGCCGATTACACCATGTTTCGAAACAGTCCTGGGTTGGACTCCGGTCTGCTCTGGGGC  
GGCGCTCTCGGTGTTGTAGGCTTCTTGATTGTCAAAGAAGTCAAAGCTTCCCGTGGTTCGCC  
GGCCATTCTGGCCGCCGCTGCGCTAACTCACTTTGAGCACCTATGTTATTTGGGCAGAAAA  
AACGAGTACACGGAATCCTTCTTTAACAGAAGACAGCAGGTGTTTGCATTACTCCTGCCC  
GTAGACGTAGGATGCGTCCGTGATGATAAGTCGATGCAGGGATGGGCATTGCTATCCGATTG  
CTGCTTTCCTCAAAGAAAACCTCAAATTCCTTTGAGTTGGTATGCGAACGTGATGTAGTTCC  
CATCTCTGTATCAGGCGACACAGCTAAGCAACAGAAAAACGGTAAAGACATCGTCAATCAA  
ATAGGCAGAGAACGCCGTAAACAAGCTCATTTTCATGCTGGATCCTGAACTTAAAAAGGATA  
GGGCAGCAGATATCATTCAAACCTTATCTATGGTGGAGGTGCCACTTTGGTTTTGATGATG  
ATTATCGGGTTGTTTTCGTCAGGGAGGTTAAAATGGCCATTCTAGGGAAAAGGGACAGCACT  
GTCACAACCCGTACACTGATAATAGACACCCGGTCTGGTTGGGATATTGAAAATATCGAATC  
TGAAATCATAGGTCAATCATGGAAACGCTATTTATATGATGGCAAATGGCTGCCAGTGGTTA  
TTCGTGACTATGCAAATGATGGTTCCTTATAAACCTCCGATATTGCCAGTAGGCATGG  
CAACACCTCCTGAAAACTCTACCGGGCACTTATAGCCTGGCCCCCTGTTGTTAAACGTTTCT  
GTAAATCCATGAGCGATATTTGGGGAACGCTAAAAAAAGGCGCCTTAATTGGTTTTCTGGCA  
GCTATCTTGGTGGCCCTGATTTTAGTTTTGGGGTTCTATGACTGGAGGATGAAATGGTGAAGA  
AAAATAACAATACAAAAGAAGCTATTGAAAATACGGTACCTCTTGAAGTCACAGGTATTAC  
TGAAAATCTACCGCCTGAAGGTACTTTTGATGCGTCACCAGCTCCCTCTGGTGGTCTAACTCG  
GGAAAACTCGAAGGCATGATGACCCAAACCAGTATGCCATCTATCGTGCCTGAACTGCTG  
GAAGCTGGGGATGATCCAGAAAACTTTGGATGCGCACGATAATAATGAACAGTAAGAATG  
CGGAGGCTGAGAAAAAACTCGACGCTGCTCTTGCATTTTCGATTTATGCGTTGAATTTGAT  
GATAAACAAGGTATGGATTATCTGAGACGCAAGCTTTCGGCTGGGCATCAATTAACGGTGC  
GGCTCGGGAACAAGCTGTTGCTGCGGTTACCGGTGAACGTTTTAGGACGCCAAGCCTGGGC  
AAAACGGTAACAATCCACCCCCACAGGTAAAACCTATAATGGTTGCTATTTGGGGTTTTATTG  
GCCCGGAAGGCGCTGGCAAACTACTGCCATGACCTACTTCATGGAATATCATATGGCACTA  
GGGGGTGTTTGCAGATCCTTTCGGGCTATACCTTGTATAGCCCTAAGGGCAAATTGGTAAA  
AGACATCGATCTTAAAGAGCTTATGTTGATGTCTGGGGAGCTTAAAAATGTTGTTGTGGGAA  
TTGACGAAATCAACAATTCAATGACTCGTCCCGTCATATGACCACTATCAACCAACTGACA  
GGCTATGTTGGCATGCAACGTCGCAAGCTTCTCTCGGCATCTTTTATACCTTGCAGAACTGG  
ATGTGGCTGTATGACCGCATGCGTTGGTTAACTCATTTGTTAACAGTATGTTCTGATCTGCAC  
TTCTCTCCCTGGGGTAAGGAAAACCATATACGACAAGGGCAGTATATGTCTATCGTCACTTA  
CGATTGTAAAGGGTTTTTACTGGCCAGCCATGGTCTCAATTATCTCCCATGGTATTACGTCC  
TCAAGAACTTTGGCCTTATTATCGCTCTTATAACGTATTGGATATTTTCGAAGGTCAAGAGCG  
TATCCAGATCAAAAAACGCCTGACCGTTTATGATCTTAATAAGGAGAACCCGACCTTCGAAC  
AAATTAGAGATGCGGCAGATCAAACACCTCCGGTCCGATTAAAAACACCACGAATGACTGA  
TGATGAAATGGCAGTATATCAGCGCTTGGCTGACCAAGGTGTTGATATGAGTACTATCCGCG  
AAGTTCAAAGAATGAAACAAGGAGTGTAATTATGACACCTGAAACTGCTCAAATTATTGCC  
GATGCCATTAATTCCTGAGGCTGCTCTCGGGGCAGCTCTCGGTGACTCTATGAGCGAAAC  
AGTCAGCACAGCCATAAACCGGGGTTTTTAAGCTTGGCGGCTACGTTAGTAAATGTATTGG  
TCATGATAGCTGTGGTAGCTGCGGCCTTATCAAACATGATGCTTGGCTCTATATCCTGGCAG  
GAATTTCCGTCACGCTGTATGCCTGGGGACAAATGGACAGTGGCATTGCTGGGAATACTATA  
TTGCAAAATTCCTCGTTAATTATGCTGGGTTTGTATCTAATCGTCTCGGCCGGAGTATATGCA  
TTCCAAAGTCTCCAGTCGAAGCATCAAGATGGAGGTTAAATTATGGGTATATTATTAGGTCC  
CAATCAGGGGTCTGTAAATGGGCTGCTTCGGAACGGCCCGCCTACACCCCCTAATAACCAGG  
TGGCCATTAATGCCGCCCGCAAGCAGCTGAATCAGGTGTTAATAATATTACCACAGTTAAG  
ATGCAGGATGGCAAATGGACAATTACCACTGACGGAGCTGTGTATAACATCGATACAAACG  
GCCAAACAGCAGATACCGTGCAGTATATAACCAATTATCTGACTAGCCGCGGGGCATCTGCG

GATATTATCAAATCAGTTACAGAGCAGATTCCCATTATCACGACACGGGAATCTGGAAACGT  
CGTTAAGAAAAAAACCAGTGCAACTATCACAGATCCTAATGATACCACCAAGAAATACACT  
GCTGAACCTGTAAATGAACCAGCAAATGATTCTACCGGTGAAGGTGATACTCAAACCTAACA  
CCGATGTTTCGGTCACAGTGGATAATTCTACGGCATGGACGTTTACTACCCCTAACGGCACA  
GTCTACACCGTGCCCATGGCGGGCTTAGCCTGGTCTGACCCTGCCAAAATGCATGAATATAT  
AACAACTACCTGAACAGTATCGGCGCGCCCGCAAATGTCATCATGGAAGCTGTTAGCCGTA  
TGCCGGATGTAATGGGGGATACTGGTTTAAGAGAACCCCGGACTGATGAGTTTGGTAACCTG  
ATAGACAATACTCAAGAGATTAAGGATATTATCGCAGGCAGTGACCAGTCTCTAGCTTCTAT  
AACTGCCTTAAAGGCATTCTTAGATGCCAAAGGCTTTTCCAACCTGTCTCCTGAAGAGCAAT  
TCAATAAGGCGATTGAGTACGGTTTGATACCGACTGATTCTGTCTATGTACCGCCTGATGCC  
GGTTATAACGTAGGTCAAACGCACCCGCCCGGAATGCCTGATGATGTAGCCGTATCTTTGGG  
GCTACTGCCATCTAAAGAACAGATTGCATATAACGCCCCCAATTTTGACTGGGCGTACCTTA  
GAAAGGCAGATGCAGATCAGTACTTTGCCGAGCTAAAGGAAATCGTTGGCTATGACATTAC  
CTCGGCTAACCTCAAACAGGCTATGCGTGAGGCTCAGAAAATAACTACCAGGCAAATCTA  
CAGGCCAGCTCTGTAGCTATTGCCTTGAAACCTTTTATGCGTGGAGAAGGAGATAATCAGAC  
TATTGATATCTTCGCCGCCTATAAAGCAGGTATCCCGGATAGTGTTATGGAAAAGGCCGTTG  
GCATATCAAAGGCTGATTCTATCGACATTAAGTACATGCTGAAATACGTTGATGATTCAGGC  
AATGTGGATATCCAGCAGGCTGTATCTGACGGCTGGGGGAAAGGTATCTTGCAGAAGTGGTT  
CGGGCTGTCTGATGCTGACTTTAAAAACGCTGAGTTTGCCTCTGATTACGAAGATGCAAAC  
TCTTAGAGAAAATCGGCATGGCATAAAAAAAGACCCAGGTGAATTCTTAAAAAACGTGGG  
TATTTCTATGATACCTTTCTATGGTACATGGAATTCAAAGATGATAACCCTGGTTGGTTAAA  
TGCTACAAGTTTAGTTTTAGACTTAGCAATCTTTATACCTTTTGTGCGGAGGTGTTTCCGCTTA  
GCCAAAACCTGGTATTGGTGCAGGTAAAGCTATTGCCAAGGAAACACTTATGACTACCCGTGG  
TTTAGTTATGGCACCTATTACAACCTGCTCTACATCCTATAGCTACCACTAAAGCCTTATTCTC  
ACCTCTGGGGGTATTACTCAGTAAAGTTAAGGTGCCCTCAGCCATATTCTGGCGCGGAAATA  
GGAGTGAGGTGTTTGATATTGCTAAAATAATGGCTAATCCTGCCTCAGTCGAAACAACAAAA  
GCCATGGATAGAGCTTTGGTACTCAGAAATGAAGGTAAAGCATCTGGTTCGGTTCGGATTGT  
AGTTGACGGCACTGAAATAGGTACTATCAAATGGTCTGATGCTGGATTCCAAACGGTATTT  
CTAAATCCATGGGGCATTCTACCCCGTTTGGAGAGCCGTTTAAAGCTGGCATGACAGTTGAT  
AAAGAAGGGCTATATCTCTCCCCAATATGAATCTTGGTTTACTAATGCTAGTGCATATGG  
TCGGGTACCCGGTTATGTCTTTAATAATAAACTCTGGTTGGCTCTATTGGTGTATGGGGGA  
AACTGCTTGGGCAAATGGTAATGTCATAGGTAGAGTTGCTGACAATTCACCCATCTTAAGG  
AATGGCAGTGATAAGAAGTTAGGAACACTGCTTTTTAAAGATGATAAGCCTTTCATCAATAT  
CAATGGCCGAGATATAGAAATCAAATATACGATAGCGGCCTTGTACTTATGCGAATGAA  
AAACAGATCATTGGTTATTTACCACAGGGAACCTAAAGTATACGGAGAGGGCAAAGTTATAG  
TCGGGCAAATCAAAGAAACACCTACTTTCGCAATCATCCATAATAACGGGCTTTCGCGCCTG  
CCAAATGCAATTTAGATGTTAAGAATATGCAAGAAATGGAACTAAAGCATGGCAATACC  
TGAAAACCGACAAGGCAGTAGGCAAACTTATCCTGTATTTAAACAATATCTGGACTGGATA  
GAAGATGAAGCGGTAATGGCTAAAGGAAGCCGCATAATTCCTGATTAGACGATAAGGGCA  
AACCTGTTGTTTTGCGAACTGCTGGGCCAGATGGGCGGACTATCAGCGTCCCCTTACTCCAA  
GTAGTCACACCAGATTGGTTTAAAAAAGTTTAGAGATTACCAGAGCGCTTGGCCGCAAAG  
CGGACACTCTTAAACCCCGCCGCTCTCCAGGTGATAAACAAGGTAGAATCACTCCCCAGA  
GGAATGGATGAGGACTTCATATCTTATATGCGCAAGAATCCTGATAATGTACTCTATGGCAG  
TACTGCTGAATATACATTCACCGGGGGCAGAAAGCCCGGAGACTTAGATATTCAGTCTCCTA  
CCCCGAAAAGACAGCCAGTGATATTGCTGATATAGCCCGCCGCTATACTGCAAATGAGGT  
AAAAGTAACTAAAGTGGCCACCCACTATACAGTATCTCAGCTTAAAAATGGGTTGTGGAAA  
AATATCGCTGACATATCTGAATTAGGATGGAAGAACTCGATGCCGGGTTTAAAAGGCTGA

ATGCACCTATCAATACAGTAAAGGTAGAAGGCATTACGATGGAAGCGCCTAGTACTCAGCTT  
TATAGCCTACTAAACCGAACTGTATCCAACCTTTGAAAAACAGGACCGTTTTACGGCTATGGT  
AAGCAAACCTGGGAGGCCAACTTGATTTGGGCATTGGAGCCAAAGCCCCCTCTCTGGCAGATT  
TGTATAAACTAAAGGCCAAGGGCGTCTACAATACTGTCCGGGATATCTTTGTGCCAAATCTG  
AAAAAGAAAATCAATTATGAAGCCTTGGCTAAGTCTAACCCGGAGCTGGCCGGTAAGATTG  
AAAAGGTCTTTGCCTCCGAAGCGGATACTCAAAAAGCTTTACTGACTACGATACGGGAGAA  
ATCCCCAAAATTGGCTGATAAACTGGAAGATTTGCTTGTCTGAACGGAATATGTCAAATGCAG  
CCCGCTTGGAAGCTGCCCCGCAAATAGCACCGGATTTAATACCTGAAATAAAGGAGTTGCTG  
CGTGCTGAACAACGGTCTATGTCTGCCGCCCGTATGGCCGCCATGACGGCCGGAAGGGATG  
GACGCGCCAGTGCCATAGTAATAGCCGGCAGACTGGCAAAGTGGCGGCAATGGAGAAAGC  
CCGCTTGAAGAGGAGATAAACCGCCGTGCCAAGCTGATAGAAAAAGAACTACGTAAATTA  
CCGGCACGTATGCCGGGTGTTGGTAATATGAGCAAAACCAGAATTACCGCTACAACACTGG  
AACGGAACTGCGCACCGGTGGGGGCGATTATGCCAGCCTGCGCAGCCGGATAACCGCCATC  
CAGAGGGGAAAGAGTCCCACCGCCGAGAGTTCCTACCCTTAATCCGCCGGATAATCCGCCTC  
CTAGGGTTCGATCCTCCGCGCATTACCCCGCCAGATTTTAACTACAAACGAGAGAAGGGCAG  
AAATGACAGCGAGGAAACCTCACTTAATGCCCGTCCAAAACCTTAAAAATGGGGATGTAGCC  
TGGAACAAGGGCGAACTGGGTGCTGGTGATGATAAACGCCCTGTTTGGATAATAAAACGTG  
CCAATGGCACTCATGAATATGTTTTCCAGCCACCGGAAGGGGCAACCCGATTGGAAGGCAC  
ACCTAAGGAAACATTCTTTACGCGGGGTAAAAAACCGCCTACCAATCTGACCCAGCAAATG  
GGAGTTACTACAGCTAAGATAAATTTGAAGGATAATCCGGAGATAAGGTTTGTCCAGACTA  
AAGCGCCTAAATTTAAACCATACATCCCAAAGAGTGTCCGGCGGTCTATAGGCATGTGACAA  
AGTGTCACAAATATTCCCAGATATGCGAAAGGCCGAGTGTTTTACTCGGCCTCTTAGGTTCT  
ATTATTCTTACCTCTTAGCATTTTAAAACCTCCCTGACTCTTTAGGCACGACTGAAAATAGCA  
TGCTTATATCTGATTGGGCAATTAATAACCTTCTCTAAAGACATTGGCACATGTTTCCATTT  
CTTTCATTGTCAATTTCTGGCATTCTCCGTCTCTGATACAAATATATAAGCCCTCTATATATTC  
CTTGGTTGCATTAGCTTCTAGCCATGCCCTAGGGTTTTTAGCAAACCCCTTCTCTAATATCTC  
TCCTACACCAATCGTCCAAAGCATAGACTCTAGCAGGTCTTTTCTTACTTTATCTTCTGGCTG  
GTAATAAACAGTAAATCCTCTTCCCTATGTCCAGTGCCATATTCTTTACTCCTATTTACAGTAT  
TTAATATCTTTTATCAGACTTTACACGTTTTAATGCGGTTTGTCAATAACATAGTATTGTAAA  
ATAATGAAAATAATTGTAATAATCCTACTATGAAATCTTTAAAAGAGCATCGGTTAGAAAAGC  
TCATAACTCAAACAGAATTAGCAAAATTAGCTAAAATTAGTAGAGTGTGAGTGCAGTGCAGCCAAATT  
GAAAAAGGCCAGCAGAAACCATCCGAGTTAACTATCCGTAAGCTAGCTAAAGCTCTTGATG  
TAAAACCAGCGGATATTGAATTTTAAATGAAATTTGAATGGGATACTCGAACCAGAACATGG  
GTCGGATATTTATTTATTTTTGGTGGTTTTTTTTGCTTTAGTAATTAATCTATTCGAAACTCCAT  
GGTTTTATATTCCGTTCTTTGGAATTGGTATTGCTCTTATCGCATACAATCTTATTCGCTATGG  
CCAGCTCCGGGACTATTACTGGCTATGGTGCATGGAACAGACGAATTCTTTGGCCCATTC  
ATAACGATATTGAAATGAAGCTATTCCAGCCCCCGCATTATCTGCCTGGTGGCTGGCAAATC  
TTTTGGATAACCGGCTAAGGACCTCTCAAAGCTACCATAATCATCCGCAAGTGGGTCAGAGA  
CGCTGAGAAAGTTTTGCGTAAAGACCCAGAATATAAAGACAGAATGCCTAGGTAGGAGGAA  
TATTCTTATAACAAAATGATATAATTTACGTACATGTAGTTCAATTAAGAGTGCTTTAGGG  
AGAGATAGTTACAATGAATGAAAGTAATCAATTAGAACCGATACCAGAAGGGCGAAATCCAA  
ATATCTCTATTTAAAAACAAAGAGATCCGAAGAGTATTGCATGACGGCGAATGGTTTTTCTC  
CGTGGTGGATATAATAGAAGCTATAACAGATTCTATCAGGCCACGACAATATTGGACTGACC  
TTAAATCTAAGATAATCAAAGAAGGCGCAAATGAACTGTACGAAAATATCGTACAGTTAAA  
AATGCCTGCTTCAGATGGTAAAGAGCGAGATACGGACGCAGCAGATGCAGAAACAGTCTTC  
CGAATTATACAATCTATCCCTTACCAAAGCAGAGCCCTTAAAGAGATGGCTAGCTAAAAC  
AGCGTATGATCGTATTGAAGAATTCCAAAATCCTGAGATAGCCATCAAACGAGCTATACTTG

ATTACCAAATACAAGGCAGAACAGATGAATGGATAAAGGCGCGCATTTCGAACCTCTGACTAG  
CCGTACTIONAATTAAGTACGAATGGCAAAAACGAGGCATAGCAGGTGCGGAGTACGGCATT  
CTACTAATGTAATATCAAAAGAGACTTTTTGATATAGATACAACAGAACACAAGGAAATCA  
AGGGGCTTGCAAAAAGACATAACCTCAGAGATCATATGACTGATATGGAACCTTATCTTAACG  
ATGCTTGGGGAAACATCAACAGCCGAACCTTGCAGAGATCGAGGGATGCTAAGGGTTTTCAAG  
AAAATGAGCAGGCAGCTCATGCAGGTGGGAGAATTGCAGGAGACACAAGAAGGAATTTTCG  
AAAAGCAATTAGGGGAATCGGTCGTCTCTAAAAACAATTTCTTGCCCAAACATCCCGATCAG  
CCAAAATTAGAGGAAGGATAATTATACATACCCAAGGCAAAAATATTTTTATAGCTTCAGGTT  
ATCAACCGGACTAAACTTCTTATGCCCTTGAACAGCTACCTCAGAATTCAAACTGGCAGCGT  
ATTTTCTAGTTTTGCGTCAGAGTGCTATGCCCCATAAGAGATTGAACTTCAAACCTCCCCTGCC  
CATTCCGTAAGCACATAGTAGCGAAGGTGTGCCTGAATGTATGAGGGCTGCACCGGATATTT  
GTAATCCCTGCCCGCTTTCTAATACGACGATTGTCTGCATGATGCCATTTTTAGTTAAAGGG  
TGGCACTCTTATCACTATAGCGAGTCTTGTGACGGCTAACCCAAACATCAGGGGTTTTATCT  
CCGGGGAATGACTGGATTTTAAAGATACTGATATTCCAGTAATGCCCTCTGAACTTTAGGGCC  
TATGCGTACAATCCTCTCCTTAGCTCCTTTGCCATAACCTTAACCAATTCATATCATAATT  
GATATCACTCCACTTCAGCTCTGTGCATTCCCTCAGTCTGAGGCCTGTATCCAGCAACAACA  
GAATAAGTGCTTTATTCCTTTTTATCTTCGAATGTTTCGCCGGACACTAAAGCCAGCAACCGCT  
GACAATGCTCTTGAGTGAACGGCTGAATAACTTTGCGGGGTACTTTAGGCAGACGTACCTGT  
TTTAAACGGATCTACTGTAATTTGCCATTGTCTTGAGCCAGTTAATAAATGGGCGAATTTGC  
TTGAAGTAATCAGTAACGGATTGTGGGCCGTTGGTCAGCTGTAACCTGTTGTAGAAAATAAACC  
GAGGTGTATTGAGGTAATCTGCGCCGGCTTAGTAACGCCATGTTCCCTGGCAAAAATCAACAA  
ACTTGCCGCACATATATCTGTAATTTGAAATTGTTGCGGGGCTCAGCTGCCCTACTTTGGCCA  
TAAGAAGATAGGTGGAAAGACACAATCTGAGGTCATCAGGTGTAGTCAAAGGTCAGTACG  
TACGATTGGGTAATCGTAAGAATTTTTGTGAGTTAAACGGTCATTCATGCGCCATTTTCGAGCT  
ACCGACAGCGCTTTTAGCTTTATGGTGGAGCCGGAGGGATTTCGAACCCTCTACCTTTTGACT  
GCCAGTCAAACGTTCTCCCAAGTGAACCTACGGCCCCAGCAACAGATAGATAATCTATCACA  
ATGGACACCAAGTGCAACTTTTTTTTAGCTTTACAGCGAAACCGCAGAGTCAATAGTTATCCT

>Dmc\_IME1-9

CCGCACCCTTTTTCTTGCAAGGATAACAGGAATGCCCGTATTAATTGAGGAGATATTTTCAGA  
GGCTAACTGGAGACTGAAGCGATGACAAAACGACACAAAACAGTTAACACGCCGACGGTAA  
GTATCAACTGTTTTTGGAGATTTACTCTCTACTTTACATGAAATTAAGTAAAACCTCGAGGAGC  
CTTTTTAATTCATTTGATGCAGGACTGTGCTCTATGGCACGAATGAGCTCATCGTAATTAATG  
TTGTCAGGACTGTGCTCTTTCAATTCATTTTCGGCACGGGGAAGGCTGTTTTTGACTGTTTTT  
AGCTTTATGGTGGGCCATCTTGGTCTCGAACCAAGGACCTCAGTCTTATCAGTTCAGCCTTT  
AAAACCAGTAAATCCCCTTTTAAACCGCCTCCTTTTAGTGTTTTAACTTTTTGTGACCTCAAT  
AATCACAGCAATTGCCTGACATTCTTTGATAGAATGCACACCCTGCCATTCTTAAGAATAC  
ATTCACCATTTTGTCTATAATCTTTGCCACCCTTAGTTCATCGTCAATAAGGCACAAGACTA  
TGTCCTTATTTCCGGAACCATATCTCTATCCACAATAACAATATCACCATTCTCAATCTTAG  
GCTCCATACATTTACCAGAAACAATGTAGGATTCAATATTATGACGAGGGCGCTTCACGCACA  
CGTGTCCGATATATATAATCTACCGGGGCAAAGCCTGTATTCCCCGCATGTGCTCTAAACTC  
AGAATAAACAGGTATGCTCATTGGAGTAGCCAATCTTAATCGTTCAAGTATTTCTCCGGAC  
TTTCAGGACGAGATAATGGAATTGCAGTAGTGGAGTTGCTTATTCCTAATGCTTCATATAATT  
CATCAATATTTATGTTAAAAACATTGGCAAACTGCATCAATTTATCAACACTCGGATTCGGC  
CTTCTGCCTTGTTCAGGCTGACTTATATTTGTTTCGTGGTACTCCTACCTTATCAGCAAGCTGTT  
GTTGAGACCAACCCCTTGCAACTCGAAGGCTCTTAATTTTTATGAGGCAAATTATTCATAAAG  
CACCTATCTCTTAACAGATACTATTTTATCAGATATTACGCAAATTAGAGAGATTAAGCAAG

ATTGGAAGACTAAACAGTTGGTTCTTTTTGTATCCATTGGTGCATTTGACTGTCTTTGTCATT  
GACCCATTTGGTTACAAGTGGTACATTTGCACCTATGAAGAGCTTATTAGAATTACTTGTAA  
CCAAGCAAGACGACCTCAAACCTAAGTGACTATGGTTTTGTCAATTTTTTTGAACAATCATAGC  
TCTGTTACTGTATCTCGTCCTCTATGGTCTCAAACAAGTACTAAACGACGCCAAATCGGTATT  
ACATTACTCAAAGCCACAATACAGACATTCCCAGAACTGGAAGCTGCCGTCATCGATTATCT  
CAAGAAAATACTAATCATGAGTAAATCTGATTGTGGTAACGCTACCTTGTGAAATACGGT  
CTTGAGTATTATCAAGCAATTGGCCGATTGGGCGGCAGACC AAAAATTAATTATCCGATGA  
AGTACAAACGCGTACAGCCTCCCTATCTGTATTGGAGAAAGGAGAACGGCACGGGGAAGGC  
CAATCTCTTACGGCACTTAAGAGGCTGTACGCAGAAAGGAAGCGAGGCAATGCCTCAACAA  
CAAGTAACCTATCGTATCAAGAACGAACACACCGGTCAATGGTGGGAGGGAAAGGCTGATA  
GCCCCGATAGATGCCATGCGGAAAGCCTCCCTCGAATACCCGGTAAAAGCCCTAAGTCCGG  
CTGGACAGCTGAAAACCTGCTGGGTACGTCAATGGTGTCTGCTGGTTATGGCTCATGGGTAA  
CCCAGACTATGTCCGCAAAAACAACAGAGATGGTGAAAGCATGAAATTTTTTCCACGTGCTT  
ACCGCGTAGCTAAAGGAGAAATAATATGCCTTATAAAAAGATATTTCCCGGCCAAGATAGTA  
AGTTTTGACCCTTATTTTGAATGGAACGTGATGGTCTTAAGTCATTTATTACCGTCACAGCA  
TTTTCTATGGATGCACCGGGCAATCTATTGTTGGATGAATTTTCAGAAGTCAGAAGTCCCTAT  
GCTGATAACAGTCCATAATCCCCAAACCGGTCAATCATTTAATGCCTATGTAACCAAAGTTG  
TGCAA AATTCTCCCGCCTGTTACTGGAATACCATCCATATCGACATAGAACGCATACTCAGA  
GCAGAAGAAACGCCAACAGCTATGGCAAGCTACCCCAAAAAGGATGACCTTAATGACTAGT  
GGAATGGTTATCTTGGCTGAGATACGTACCGAGACTGAACAAGGCCGTCCCGCCCCTACCAC  
GGGCTGGGAATGGAGTCCGGGCTGTACCCCGCTCAGAGACCCTTCCCCTGGCAAATGGATTG  
TTCGGCGCACAGCAGACAGCTTTGATGTGATGTTCCGCTCATATTTGACTCCTGAACTACGC  
AGCGGTGGCCCTGAATACTGGATAGGCAGTTTTAATCCTACTGATGCAGGCGAATTAGGTGC  
CCGTGAAATGGCGCTTAAACTGCGCAAAGAATCTTACAGACAGGAGGCCGAACGTAATGGT  
CACAGCGATATCGAATAAACCTATTGAATTGTCACAGCGGCGTTATCGCCGAGGGAATTACA  
TGTA CTGCCAGTCCGGGCTGATCATAACTATAAATGTCCGGTATGCGGCTGCCTGGTACAG  
CCCGGAGAAGTGGGGTTTATGCGCTACCGGATTATACGTGACCTGGTAACTGAGCCAATTGG  
TGACGTA CTGCATGCGTGCTGTGTGGAGGCAGGGAAATGATGGAAATTA A AATTGGTTACCT  
ACTGCTCTCTGCGGATCTACATCAACCCGGAGATGTAGATATTACCTTGACGACTGGAGATG  
GCACACTTATTGCTGTCGTTAGCTCAAAGACACTTATTACCGCTATTGAGGTACTGGAGAAG  
ACAGCGGAATAGCATATCCGGATCAGGACAGGGGAGCGTGATCTCCCTCCCACCCCTCTGTC  
CTGAATTAATAGTAATCGAGGTCCATTATGACAATAGCAACACGTA AATATACGATAGACG  
ATATACTGGCCAAACTCCAGGGCGTCAAAAAGAATGGTTCAGGGTTTATGGCCTGCTGTCCT  
GCCCATGAGGATAAAAACCCCTTCTCTCTCCATCAGCGAAAAGGACGGCAAGGTGCTCCTGA  
AATGCTTTGCCGGGTGCAGTTATGAACAAATCATGACCGCGTTAAATATGCCAATAAATGCC  
GCAGCACAGGATACTACAGCCACCTCTTCAAAAAAACCAA AAGAGAGCACCAAACGGGAA  
ATAAAGCAGACTTACGACTACACAGACAGAAGCGGACAGCTGATATTCCAGGTAGTCAGGT  
TTGAGCCCAAAAGTTTCTCCAGCGACACCCTGGCGGCAAGACCGGCTGGGTCTGGAATATG  
AAGGATATCGAGCCGGTTATCTATCATCTGCCAGACGTGCTGGAAGCGGTAAAAACAGGCC  
AGACTATTTGGATAACCGAGGGCGAGAAGGATGCTGATAACGCCAGGGCTATGGGCTTGGT  
GGCCACTACCTCCCCGATGGGGGCGGCAAGTGGCGCGATAATTATACTAATGACTTATTGG  
GAGCCTCGCAAGTAGTAGTTATTGCCGATAAAGACGCTCCGGGCCGTAAACATGCCTCCGAT  
ATTGCCATGTCCTGCCGGCGGCAACGGATACCGGTCAAGATTATCGAGGTACCCGGCGACGC  
CAAAGATTTTACCGAGTGGTTGGAAGCCGGCGGCCAGACATCCGAATTGGATGATCTGGTA  
GCTACAGCTAAGAGCTATACGCCATCAAAAACCAGAGCTTATACTTTCTGTCTGATGGCAA  
GTTTTCTATCGAAGCCGGCCGGATTATTTATCATTACATACAGGGATAATGTCCCCTACGATGC  
TCCGCTGTGCAATTTGTTGCTGCCGTTAAAGAGGAGATCATCAAAGACAATGGCATAAACC

GCAAAACTTTCTTCAGGATTGGCGGTACAGACTGTACTGGCCGTCGGTTTTCCAGATATAGAA  
GTCCCGTCCGAAAACTTTTTCATCCATGTCCTGGGCATTATCCCAGTGGGGAATTAAGGCTAT  
GATCGAACCCAGCCCTTCAGCTGAACGGCTATTACGCGGGGCAATGCAGTACATGTCGATGG  
AGGCACCCTGCCGGATTATTTATGAAAATACCGGCTGGACTAATATCAACGGCAAGGATGTT  
TACCTTACTCCCCACGGCGCAATCGGAGCCGATAATGTTGAAGTGGAAATGCCATCCAATAT  
CAGCCATTATGATATACCCTCGCCCGAACAGAATGACGATGTGAAGTCCTTCATTGAGGCCA  
GCTTTAATTTCTCAAAGTAGCCAAGTTATATATTACCTTGCCGCTGTTTGCGGCTATGTACA  
TGACGCCTTTGTCAGACGCCATTGATACCAACTTCAACCTCTGGCTGATTGCCGGTTCTGGCA  
GCCTTAAAACCACGATAGCATCACTGGCACTCTGCCACTACGGAAATTTTGATTATACCTGT  
GTGCCGGCTGCCTGGCGGGATACTCAGAATACTGGAACGCATCCTGTTACCTGCAAGGA  
TATGCCGGTGCTGGTAGATGACTGGTCACCCGGCCAGACCACCGCCTCACAAAAAGAATTTG  
ACGCTAAGGCTGACTATGTATGCCGCGGACAGGCTAACAGACAAGGCCGTAAGCGCATGTC  
TGCCGATACATCTATGAGGCAGGAATATGTACCCAGAGGCTTCCTGATATCCACCTCGGAAG  
GACAACCGCCAGGCGAGAGCAATAATGCCCGTTTTCTGATCATTGAAATGTCAAAAACAGA  
TATCGAATTCCCTTGTCTTACCCTATCACAGAAAGAGGACCATCTGTACCGCCGCGCTATGG  
CTCATTACCTGGCATGGCTGCAAGCGGACTGGCCGGCGAAGAAAGTGTATCTGCGCCAGCG  
CTACCAAGAGGTTTTTTGAACAATTTACTGAGAGTCTCCGGGGTGAAAATGTGCATCTCCGGC  
TACCCAGATCCATCGCTCTGTTATATATCGGTCTGGAAATGGCTATTCGCTGGGCCGAAGAA  
AACGGAGCAGCGGATATATTTGATAGGTTATAGATGAAAGCGGAAACGGGGAGAATGATT  
CAGTCGGGTCTGCGTATCTCTTAAAACAAGCCCGCAAGTATTTATTGAGATGGCCAAGCGA  
CAGGGTGCCCGGATAGATGAGGCTACACCATCGAAAAAGTTTTGTAACGCCTTAAATGCAG  
CCCTTATAGCTGGTACTGCATATCTGGATGTTAAAGATGGGGCAAATCCTCGGTCTGCTTCA  
CCTGGGCAAACCTCTGATCGGTTGGGATGACCGGACTAACGGGCACGTTCCCTCCATAATGA  
CCTGGCCTACCAAGTAGCCAACCAGCATTACCAAAAAATCAATGAGGCTTTTGTAAAAAAGG  
ATGCTGTATTTATGGATCTGGTGAAGCGTGGTTATGTGGATCCGGGTAAAGATGGTAAAACC  
ACTGTCTTTGAGTATATCCCGGTAATAGCAAAGGCATGCCGTGTCCTACATATCAAACGTGA  
ATTCTTGGGGCGGGATGAACAAAAGAGAGGTGAGTAAAACAATGAAAAAATGTGTGTCGCC  
CCCAAAAATATCCCATGTATTAAAAAATGGTGCAAGAAGTGCAAGAAAACCTGTTTTAATCG  
TAAGCCAAAATATTCTGAACGTGAAATTTCTTGCACCTTGAGGGTGCAAGAGGGTGCAAG  
AAGTGCAATACAGGTGCAATACAGGTGCAAGAGAAGTGCAAGAAAATATAAAGCTAAATTA  
AAAATAGGTGCAAGAGAAGTGCAAGAAAATATTAAGCTAAATTAAAAATACATACTCGTA  
ATTGTCAATATTTCTTGCACCTCAAACAAATATATATCACTCAGTTTTAGGGTGACACATAA  
ATCGGTATGTAAGATTGTTAAATCATTCTCAAAGGATGTGACATAAATGAAAGTCGCGTTAT  
ATGCCAGGGTAAGCACCCGCGATAAAAATCAGGATCCGGAAGTCCAACCTGATGGAGCTGCG  
GAAATATTGCCAGGAAAACGGCATGGAAATAACCAGGGAATATATAGATCATGCCTCGGCC  
AATGATTTCTCGTCCGCAGGACGGCATGGAAACAGTTGTTAGTGGATGCATCTGCCCAGAAAGTT  
TCGGGGGTTACTGGTGTGGAAACTTGACCGGGCATTCCGCGACATTACGGTGGCCACCTCGT  
CCGTAAAAATGCTGCGCAATGCCGGCATAGATTTTATTGTTACCACTGTCCCTGTTCTTTCAG  
TCCAAGGTCCAGCTGGAGACCTGATGTTTAAACATCTATGCCGCTTTTGCCAGTTTGAAAAG  
GACACCATTATTGAAAGAGTTAATGCCGGACTTTCAAGGGCAAAGGCTAAGGGTAAGGCAT  
TCGGTCGCCCAAGAAAGGCAATAGACTTCAATAAGGTTTTTGAAGCCCACGAGATAGCCTG  
CTCACGGGTTAACCGGATTACTAAAGAAAATCAGGGTTATTCCGAGACGGCGAGGATATTG  
AGCGAGCAGACCGGGCTAAGAATTACAGCCGTTGGGTCTATAACCGGATAAAGGCCGGCA  
ATTAATAATGCTTCAAAAAACCCACCCCATTTTTGCATAAATTTTAAAGCCAAAATCTTAT  
CGGATGGGAGGCTTCAAAAAACAAATGTTTTTTGAAGATGTTGAGCTACTAACTTGATACCC  
ATTATTCAAAGAAAGTCCAATTTGAAAGGAATGGCAAATAAATGAGACATCTTAAGGCGGT  
ATGGCAAGGCGGTTTATTTATTGAAGGATTACGTCCGAAAAATAGATTACACGAAAGCCCCG



GAACACATCATTTAATAGTCACAAAGGCGAGCCCCCAATTTGATGACCAGAACCTTATCGGT  
AAAAGAGTAGCAATCCAGTTTGTGGACCTATGTATTGGGAAGTTATGGAATAAGCGCAA  
AAAACGGCAAAAATAATGCCCTGCTTAGTGGTTTATTTCAAAGGTAATTGTGCTAAACCGT  
AAGACCCCAAAATTCACAATTGTAAAAAACTGTCTATCTGACTAAAAATATACTAAGGG  
AAAGGAAACGAGATGAAAACCGTATTAATAAAATCAAGGGCATCACCCATTATTAATGC  
ACAGATTCCCGATGGCGGGCGCAGACGATACATCAAACGACGTAAGTGGTGTACCGGATTG  
GAAGGCAGAGGCAGAACTAGCGTTATACAAAGATGATCATGGCCAAATCTATCAGCCAGCG  
AGCCATATTGAAGCTTCGCTTAAAGAGGGCCAGTAAACACTAAAAATACCAGGCAAACGAG  
GGGCGACCTATTCAAACCTCATTGGTTCCGCTGTCTCTGTTTCCCCTGATGCTATCACTCATT  
TAATACAGAATTACGAAACAGATAGCCGTCCTGTTGTGATACAGAAAGCACGGATAGTACG  
CTACAGGCCAATATTTAAGGAGTGGGAATTGGAATTTGAAATCAATATTGGAGATGAACAA  
ATCCCTATAGAGGTTATCAAACAGGCTCTCGATCATGCAGGGCTATATGTAGGTATAGGCCA  
TTTTCGCCCAGGACGTGGAGGAAAATTCGGCAAATTCATGGTTGTCAGATTTGAAGAGAAAT  
AATATAGTCCGTAGCCCTGCGGGTTAGTCAGGTGAGGTATGGCTCGGCTTGGTTGGGCGTGG  
TATGGTCAGGTACGGTTAGGCACGGTATGGCAGGGTAAGGTTTTAAAAAGTGAGGAGATAA  
AGGGCGTGGAAGAAGTAGATATTAGAGAAATTCCTGTTCCCTTTGCAATCGTGTGATTTTT  
AAAATTACACGAGAGGAAATACTCAAATCTGATCTTGAATCGGGAGTTAAAAAAGAGCTTC  
TAAATCTGTTGGGAATAAACACAAACAAAGAGTAATCAAGAGAGGGCGAAATGGTTACTGA  
GACGAAAGGGATTCTGAACACGGATAATCTGTTCCAAATCTTATCTGCTTTGATGGATGAGT  
GTTGTGATGAATTTGGGCCAGCAGGAGATGGCTGTTTCGCGGTGTTTATGCCGCAGATCATGC  
CAGAGATTAATAGACTCGATAAATCAGGACCGATTAATACTATGCAGAAATTTCATTTTTATAA  
ACGTGAATTCCGCAAATTGAAATCCC GCCGCAAATCATGATGGATGTGATTATCTCCTAAG  
CGAGGTATATAGACCCACACAGTACCCGCAGAAACGGGATAGAAAAACAACCACTTAGCC  
AGACTGGCAGTCCCGGCGAGGAATGAATAATCCAGAAATAGCAATCGTGGTATAGCATAAG  
TCAACAATCCATAAACCCACCAACAATATTTACTACGGTCACAAATAGATTTCCGAGAACA  
CTATCTGAGTACTGCATAACAGAGAAACCCAGCAGGGCATTGAAAAATGATTGCTCCGGGT  
CACCAAGCCAAGTGCCTTCCAGAATTAAGCACATGAACTGGCCTACAATATATGTAAATGCC  
AGCCAAACTAACCCTGCTGTCTCATCAGTAACTTGCCAGCTTTCTATTAACCATTTCCGCCGA  
TGATTATGATTCCTCCGGCAGTAATACCCACCATGACGTGCCGATAATGGCACAGAAGAAA  
ATCTGCCATATGAGCCCGGCAGCGGCGCACGGCAATAACTACTGGTTCAGTCCCAAATAAC  
CATAGTACTATGGCTGCCCCCAAATATACTAGCGAATACCAGAAAAAAGCAGGAGGGAAA  
TCCATGTTTTCCAGGAAATCACTAATCGCTTGCCCGCCAGGTAGATTTTCAGGGTGCAAATC  
CCCATAACATCCGTCCGGCATTCTCCAATGTCATCATCTGTAATTTCCACGGCTTCATC  
GTCTTACCTGTGATAAACGCAGACTGATTACAGGTTGTATAGCTGATAACTGATACGGATA  
CATCCGCATCGGTGGTTGTAGTCCGGAAGGAAGGAGTAGCATCATTGCTGTTCCCGGACAGG  
TCCGTGAAAGTAGCGGCGTATTGCCATTCCCACGAGCCTTTTAATACCCCGCCACTGTTATT  
TTGGCATAGTACAGGTAAGGCATCGAGCCGTTAGCCCCAATAACCAAGTTGTTAGCGTTATC  
AGTAATAGAGACTGCAAATGCGGCTGAGCCCTCTAAGAGACCATCTATATAGATATTCATCG  
TGCCTGCAGATAAAGATATCTTATATACATGTTCTGAACTGGATATATCCGCCGCCGTAACG  
ATTGTATTATTTGCATTTCTGTTATTGATATATTTATGTCTGTTGTAGCAGTGCCACTCCAAC  
TAGACCTGAATTATTTGTAGTGCAGTATCTGCCGTTAGCATAACGGATTAGTAGGGTTATAC  
CAGTGAGTTAATTTATTACTGGAGTCCCCGTTTGGGAGTGACAAGACTATTGCATAACGTGT  
TCCGGCAGTTAGATTAATTATATTGGAAAAATCAAATGTATGATTTACAGCAGAAGTTGAGA  
TAGTTGAAGCTACCACCGAACCGCTAACCAAGGCACTTCTGTTGGCACATCGCCGCTAGTT  
GCATAGATGGCATAATTAATAATTTCCAGTTGGATTGCCTACTCGTTGTGTTCTAAAGGTA  
TTGGTTGACAGCCACATCATTAGAAAATTGAAAGGTCTGTGCTATCCAGTTAGCACCGTACA  
TAGATGTAGCTGAATATGCAGTACCATTATATGGAGTTTCTGTATAACTTGATGAATTACCTG

CCGATACATCTGTTCCAGACGTATAAATCCAGAATGCTCCAAATTTAGATAGGTTATAGCCA  
TCATTAATCTACCACTTAGCTCAATCTCAAAACTATTTCTAGCTCCAATGAGGCAGCATCA  
GCAACTGTCATGCCGGCTGTATCGGGGCAATAGGCCAGTTTACCGCCCATAGCAGTTTCACC  
ACCGGTATATAGGTTATAGTTAATAGCCGAATTTTGCGCTATCTGGTCAATCCACATAATCC  
ACGGATCAGATCCTTGCCCGGCATAAAAGGTATGTCATTACCGATGGAATCACGCATGGCG  
AGGTTATTAACCTCAGAATCTATATAATACCCATCCAGCAGACTATCCGTTGCCCAGGTA  
GGCGCGGCAACATGTGTAGCTGTGTAACCTGGCATTGGTAGCCCGGATATTCGCCTGGTATA  
TAGCATCTGTTATAGTTGAGGCTAAAATCGTGCCCGGCCAATAATGGTAGCCAGAATCAAC  
ATACCCACGGATATTATTAATTTCTTCATGCGTGCCTACCCATCAAAACATAACTGGCATA  
GCTGCATATATGGTAACTATCATTGCTAGCAGGACACCGTTAAACAATCCCATATCGGTCCC  
ACCGCCAATATATAAGAACTGGCAATCATTGCTCCGTGGTTATTCGCATATTTCACTCTGCC  
CCATATAAATAATCCTATTACCATCACGATACAAATTAGGCTGGTAATCATTTGCCAGCTGG  
TTACATTATTGAAAATGGATGCCAAGCCTTCCAATATATCCCCGATTATTGTTCCATCCCATT  
GATGAGCCCACTCATCCAGCTTTGTTCATACCCACACTCTTCTGGTCATATCCAAACCCTGAG  
TTTGAGTCGAAAAGATCTTGGGGCACATGGTTTGGAGACCCGGAATTGTGCCCTTGCCATAA  
GCAGAACCGTATTCATTAACACCGTGCCCTGGTCAGTCTCCGTCAACAGCTTTTGCACCCA  
GTTAATCTCCAACGCCCGGCAAACTTCGATTATCCAACCTCCCATTAAGGTCTGATTTTCCTT  
TTTTGTTTCCAGTTGGCTGTAGTCAGATGTGGTCAGAGTGTAATTGACCTCTGGCGGAATCTC  
CCAATATTGGGGGTACCAACCATCTTGAGTATCAGAGCAGTTTCCCACTCCGGAGCATCAT  
CAGCTGCAAAGTAAAAGGCGGAATACCCCATATCATAACCGGCGTTGTAGTAAGCGTATGG  
CTCAATTGCTCCAGCTGAATAATTCCATCTGTATCCATCAGTCTGAAATGAAAGAGTTTATT  
AGCCGGAGTGGTGGGCTGGCCGGATGAATAGGCGATGGTGTATTTAAAGGAGACCAAGCTA  
TCCCCTGTCTCTACAATATTGTGCGCAACCTGCACATCATCAATAGTAAACGTGGTGGGCGC  
AGCCGGGTCAACAGCCAGTACCGCTGCCGGCGGTAAGGATGCCAGACATAAGCAGGCAACT  
ATGACGCCTTTATAGATTTTCGTAAATAATCTGCCCATTCATTCACTCATATATATTGCCG  
GTTCTCTGGGGAGGTCTTCTCCCTTCAGATAGCGATAGACCTGCATCCTGCTGATGCCGTATA  
TTCGTGAGATAGCCGTAGCTCCAATACCATGCGTCTGCATGATATATCGCAGGTTATCAGGG  
AAGGCATCCTCATTCTTAAGGGCCTCAAGCAGCCCGGGTATCTTGGCCGGAACATTATCTT  
CTGTTCTTCCATACTTTTAGTCTACCTGACTGCCTGTTAATAACAAGGTCCTTAAATCTCCCTA  
ATTATTTATTAAGATATACCTCAACTGTCACTTAAAGGTGACAGTTCAAGGAAAAATCTTG  
TCTATCATCATAGAAAACGAGAGGAGGTGATAAAAAATTGGGCAAGGCAATGTCAACCGTC  
ATGTTAATTGTAGGTATCGCAGTTTTCGGTTTTATTTTTCCCGATGGTTCTCTCCTCAATGGATA  
GTATTCAATTCGCATCCAATACCGGTACCTATGCCGCCGTAACGACCGGTGTCGGCGAAACT  
ACCGCGGACGTTGTTCTTTCCACCGCCTTATACAACGATGATAACGGTCATGTTACCAGCAT  
CACGTCTACGGTTGGGACAGACGTTCCCTGTGGCCGGCACGTATGTTGCTGCTACTAAAACCC  
TGACTGTAACCGGTTTAAACGGCTTCCGAATCACGGACACTGACCGTCATCTATGACTCCGAC  
AATCTGTCGGACTACACCGGTCTGGGCACTATTGTCAGCCTAAGCCCGCTCATTATCTGGCT  
GGTAATTCTGGGTGCCTTGGGTATCGGACTTTATTCCAACGTAAGAGCTAATCCGCAAATT  
CATTATAGAAAGGAGGTGACAAAAGAAAATGTTTAACTCAAACACGATGAAGGTCGTAGG  
AGGCATTCTCGGTATAGCTATTTCTCTGCTGTTCTTCCCATCGCCCTGAGCGGTATTGATGC  
CGTACTGAACAACGCCAATTTGGCCGACTATACCGGGTTGGAAACCATCGTAAAGATAACCC  
CCATGATCGTGTGGGTGGGTATCTTCCCTCGGTTCCGGCTTAAACCCTGTTTTTTGGGGTCAAAG  
GAAGCCGCGGGGGCAAAAATCTAGGTACGGATGGCCTAAAGGAGATCGTAGCCATGAAG  
ATACTCTGGATGCAATTTGGAAGAGACAAAACCCGGACACAGGACGTACACGTCTGACCG  
AGGATGGTCGTATTGTCGAAGTTTCTCCGGATGTGCTTTATGGCTGCGTATCTGTGACGAAT  
GGGGTCAAGCATGGGTGCTAAGGGGTGCAGACCTGTGTCCCTCCCGTGATGGCAAGGGAGA  
CATACTGCTTGTTAATGAGCGGAGCTTAGCACCCATTGCGTTTGACGGACGCCCTGCACGCA

CGCACGAAGAGGCGCTGAAACTCAAGGATGATATCGGAGCAGAAGCCTGTGAAAGTGTGCA  
TTTTAATCGTGACCGCGAAATAAAGAAAGAAACCATGGCCAATGTACTCCAGGTACTTATTA  
TCGGTCTGTTCCGGCACGGTCTGTGTAATTGCTCTCATAGGGGTATATGCCTCAGGGAATGCA  
AAATTGCCATGGGTGGGTTAGAAGAAATGACAAAAGCATCAACAATTGAAAAGAACCAGGA  
GTTAATTGCCGATTCAAAACTCCTGAAGAAATAATTTTCGTTCGCGTATGCAATCAGACAAA  
AGGCTAAAAGGGAACCCAATGCCCTGGTTTATGATATGCGCCTAGGTTGGGCTCCGGAATAT  
ATAGATAATCCTATCGGCCATCGTAAATCATTCCGAAACAAGCGATTATGCCCGATTATCAG  
GCGCTGGAAACAGTTACCTACTGGCGAATGGGAAAGCAAAATTGAACCGGTCCCTGAACCT  
GAAGATATGGAAGCATCCCCTCAAAGTCTTTACAGAATGCTGCATTGGGAAACCTTTAGTTAA  
GTCTGCATTTGGAGGGTTGGGAGATATCTGGCAGAAGCTTAAGGTCGGACTGCTGGTTGTAT  
TGGTAGGTATAGGGATTTTTGCCCTGTACCTGTTACCCAATCATAAGGAGTAGCTATCATG  
GCGGGATTTAAACGTAAAAATGGCGGGCCTGCAACCGGAGGCACTACGGATACTTTAGGTA  
TCCAAGATACAATCGGTGCGGCCGGTGGCAACGGGTTTAAGTCAGGATTACTTGATTTTGAT  
GCCCTGGAAAACTACTGGGAAATCCTCAGACCGTAAGTCTGGCAAAGAATTTACTTCACC  
CGGTGACAATGTCCGCGGTCTGCTGATGAGGGCCGACTTCAAGGATGCCAAACAGGTACTC  
GCGATGATTGAGTACCTCCATCGCTGTAAAGAAATTCATTACAAGCGCGGTGAAGACAGATT  
ACTGGATTTTATTGCCGCTCTGCCAGCAATTCAGGCCCGCCGGATAAACCTCTTGGCCAAAG  
TTCTTACCCATGGCGTAATGGAAGCTTCCAGCAGGCAGCAGAAAGAACGGAGACCCGAATG  
ATCTGGGGATATATAGGTCATGAAGGTGCCGGCAAATCAGCTGCCATGTGCTATTTTGATCT  
GCTGCATATTGCCAAAGGGGGCGGGCTGTTACCTTCCCGGGCTTCGAAGTGTTTAAACCCA  
ATATCACTCTCGATGATGGTAATCATCCCCGTCTGGGCAAATCTATAGATATGAAGGAATTT  
ATTTTCTCCTCAGTGATGAGCAAAAGCTTCGCAACGTGTTTGTCTCTATGGATGAGATCCAG  
AACTTTTTCCGGTCTGATAAATACATGACTATGTATAATAGTCTCATTACCAAATACAGCAT  
GCAGCGCAGAAAGCTTAACTTCGGCATCAATTACACCGTCCAGAGTTGGAACCTGGATTGATC  
CACGATTACGTCAATTAACCCACTTCCTGACTGTCTGTAAGGATTTGTCACGAACACCTTGG  
GGCAAAGAAGCCGGTTTGAAGCGCGGCCAACTGATAGACCTGGTGACCTATGATTGCAAAG  
GGTTTATTACCGGCGAGGAATGGACTCCTTTGAAACACTTTAACTTAAATATTTTGCCGGTTC  
GCGATTGGTATGACAGTTATTCGACAGTGGATCCGCTGGAAAGTTTTAGAAAACCTGGTTATT  
AAAAGCCTGAAGATATTTTGGATATGAGAGAGGGAATGCCACGATTTAATCCGCTGGATG  
ATCCCCCTCTTGAGAATGTACCGGATGACGTCCGTGAAATAAGCCAGGAAAACAATGCCCG  
GATATTATCCAAACTTGAAGAGCAGGTGACCCGGCTACTCTTATTCAGGTGAGCAAAGCGC  
TTAGAAAGGTTAATGCAAAATGACAACGGACGAAGGGTTATTAGCGGCTGCTCAAGCGATT  
GCAAACGCGTTAGAATCTCTGGGCAATACCCTATCAGCTGCCCTTGACACATCAGTTACCAC  
GCTGATGAGTACGGCTTTATCAACCGGATTGGAATTATTCTTACTCTCGATGATTACTGTATT  
GGCGCTATGGAAACGCCATATTGTAAGTGGATATTCTGGCAGGGCTCGGGTGGTTTGGTATCA  
GTTTTACCCTCTCAGCAGCGCTTCACTAATAGCGGTAATGCCATTCGCAACCTGTTTGGCTC  
TTGGGATATTTATGTTTTATCGGATTATTGAAGACACCGGCCGGATAGGCCGATAACGAAGG  
AGGATGACATGCGTACAAGTAAAAATATGCATCAAAAGAAGCCGATAGTATCCCGGCAGTT  
AAGGTAAGCTGGCACGAAAGAATGCCTAAATTTAAAGAGTTTATTCCGAAAGACATCCGAA  
GGCGTATCGGGATGCGATAGGAGGCCGAATTATGGGTATATTAGGATTCCTTCTCAGGGTA  
GCTCCGGTAAAATCCTCTCGTATGGGCCACCTAGACAACCAAATAACCAGGTGGCCATTAAT  
GCTGCCCTGCAATCCGTTGATAGCTCAGATTCCAAGAAAATTACCACAGTTGAGATGAAGGA  
TGGCAAATGGACGATTACCACTGACGGTGCTGTTTATAACATCGATACAAACGGCCAAACA  
GCAGATACCGTGCAGTATATAACCAATTATCTGACTAGCCGCGGGGCATCTGCGGATATTAT  
CAAATCAGTTACAGAGCAGATTCCCATTATCACGACACGGGAATCTGGAAACGTCGTTAAG  
AAAAAAACCAGTGCAACTATCACAGATCCTAATGATACCACCAAGAAATACACTGCTGAAC  
CTGTAATGAACCAGCAAATGATTCTACCGGTGAAGGTGATACTCAAATAACACCGATGTT

TCGGTCACAGTGGATAATTCTACGGCATGGACGTTTACTACCCCTAACGGCACAGTCTACAC  
CGTGCCCATGGCGGGCTTAGCCTGGTCTGACCCTGCCAAAATGCATGAACATATAACAAACT  
ACCTGAACAGTATCGGGCGCGCCCGCAAATGTCATCATGGAAGCTGTTAGCCGTATGCCCGAT  
GTAATGGGCGATACAGGCTTGTGAGCGCCCAAACTGACGAATTTGGTAATGAGATAGACA  
ATACTGAAGAGATTA AAAACATGATCGCAGGGAGTGACCAATCTTTAGCTGCAACAAACGC  
TTTAAAGGCATTCTTAGATGCCAAAGGCTTTTCAACTTTGTCCTCTGAAGATCAGTTTAAAA  
GGCTCTTGAATACGGGATAATACCGGCTGATTCAGTGTATGTGCCTCCTGATGCAGGGTACA  
ACGTAGGCCAAAACGCACCCGCCGGAATGCCTGATGATGTGGCCGTGAGCTTGGGGCTACTC  
CCCAAATCCGAGCAGATTGAATTCAATCTGCCAACTTTAACTGGGCGTATCTGCCAAAAGC  
CGATGCAGATAAGTATTTGCTGAGTTACAGGCTATTGTTGGCTATGAAGTAACCAATAAAA  
ATCTTAAACAGGCTATGCGCGAGGCACAGGAGATAACCACTAAACAAAACCTACAGGCCAG  
TTCAAAGCTATCTCAGATGCAGTACTGGAAAACATTGCGCAACAAAGGCTATCTGGGCAAT  
TCAGATTAGCGGATGTCATAGGACTAAAGCCATCTGATATATACAATAGAGATGGTAGCCTG  
AATTCTGCCAGAATAGCTACTCTTCTCGGTGGTAAACCGAGTGATTACAAAACGATTGATGA  
TGTTCTCAGAAAATCAGCTGATCAGGATTCTGGTTTAGCCCGCGATGTTGTCAAAGAGATAT  
TCTCCTTTGGGCAAGCTCAAACGAAAACCTTCAATAGAGACGATCTCTCCAATGAATATGAT  
AAGGCTGCCTTTCAAGCTTCGGTTAAAGGGCTGGAAATGGCCGAGGGCAAAGAGGAATTCA  
TTACCCGAATAATCAAGCAGCAAATACCGGAGAAATTGTCTCAGAATTTGCTATTTACATG  
ATTCTATAGTCGGTACACTATATTCAATCGGTAAGGGGGATTTCAGGCGGTCAAATAGCCTT  
GTCAGCTGCTATTGATGTCGCTACCTTTATTCGGTTTCTCGGTCAAGCCGCTGCAATAGCACG  
GGCCGGGGCTAGACCCGCTGCAGCATTAGGTAAAGCGATATTGGCAGAGGTAAAAGCGCCT  
CTAACCAGTATTCTACACCCATTAGCAACTACGAAAGTGGCTTTAAGTCCATTTGAAACCCT  
GATTGTGCCGCACAAAATACCTCTTAGCTCAGCTGAATTAAGCTTCCATACAGTCCGCCTGC  
CTGTTGTGGATGTTGGAGGCAAAAAGCGCTTGCTATGGCTCTCCGGGATGAAATAACTAAA  
AAGGCAATTGCCGGTAAAACCGCTAAATTTACTAAAGACGGGGTAACAGCGGAAATCCAAA  
CAACCGCCTTGAATAAAACCATAGCCCCAGCTGTAATTAGTGCTACACCAGATGTACGCCCA  
TTCTTAGACGGCCTCACTGTAGGTGTAGTTAAAGATGAGGTAACAGGCGCTGCCTCTGTAGG  
TAAAGGCCGGGATTTATTTGTATCCCCCTCACTGCACACCAAGTTTTCCATGTCTACAGCCG  
AGGTATTGCCGGCTCAAAGGCGCTCTGAAGGGCGCAATTATTATAAGAGACCCGGAATTA  
CTATCGAACTTAAGGTCTCCGGGAACTCTGGGCTAGTGCAGCGGAAATAGAGATGCGGC  
TGCCGGCTGGTACCAGATTGCCAAAGCCGGATCAGTTTTTGTATTCTCGTGATGCTTATGGG  
GATCTCTTACATATATTAGTCATCAACGGCAAAGCCTCTCCACTTACACAAGCAGAAATAAA  
CCAGATGAAGATTATTGGCTCAGCTGACACTCTTAAAAACATTTTCAACCCTGGCACAAAAG  
CTAAAGTGACCAAAAAGGCAGGTA AAACTACCCCATATGATGAATTGATTGAAGCTAATAA  
AAATGTA ACTCAGATTA AAAACA ACTGGAGCAATTTAAAAGACTGGCAGAATCAGCCCT  
ATGCCGACGGCGTGTACGCTCTCGGTGATCTACACGGCAAATACAACCAAGTTATGAGCAC  
TCTGACCAGAGAAGGTTTTGTAGATGAAGCGGGTAATTGGATAGCCAAAATAACAACCCTG  
GTACAGGCCGGTGATATTGTGGATCGTGGTTATGGCGGTA ACTAACTGATTAATAAACTGCA  
AGCCCTTGATAAACAGGCTAGTAAGATGGGCAGCCATATACTACTCTTATGGGCAACCAG  
ATATAGTATTTGGAGCAGTAGCCAGAGAGCTAAAACCCCTCCTGCGGAGCTTCTTAGCCAG  
GCTGGTAAAGTACGTTTCGCAAGAGCTGCTTAGTAAATGTGCCGAGTATTTAGGAGTATAGG  
TAATGAATCCTCAGCCAAGTTAATGGAGACGTTCTCTAATGGACGCGGGCACGTTGCCGAAG  
CCTTGTGAGCTGATAGCAAACACTGGAATGGCTTAAAGACCCGCCCGCCATGTACATTA  
GATGGAGTCTTATATGTTTCATGCAGACAGCCCAATGTCTATATGCAGATCCTGAAAGAAGC  
CAAAGCCAAAGGTTTTTACAGGGAGCAATCTTGAATCGTCAATAAGTACACTAAAGAGCTT  
GCTAAAACCACCGAAGGATCCCAGCATCTATATGATTTGATGGTCAAAAATCGCTATCAGAT  
GACCAGAGAATCAGCAATGGAGATGCTAAAACATTTGATGCTGACAGACTTGTTACCGGA

CATACGCCCCAGGGCGGTAAAATAACCAGTAAATATGAAGGTTTGGTAACTAACATAGATT  
CCGAGTCAGGTACTAATGGTGTATCCCGCATAACATCACATAGGCGGACAGGATATCAAGTTA  
CTGCGTAATAATTCACGGGTGATAACACGAACTGAATTGGAAGCCGAATATGCCCGTGCTCT  
GGAAGAATTCAGACTGCGTGACATGGCGGTTAGGCGTGGCTATACCGTACCATATAGCGTTA  
TAGGGTTAGCAAATAGGCAGACTCGGGTATTTAGACGCGCAGAAACAAACCGGCCGCAGGAT  
AGCCACCTCGAAGGAAGCACGGGTAGCTCCAGAAACAAGACGTCTGTATCAAATAATCGT  
AGAAGTGTGCTCTTCCCCGTACAGGCAGGAGCGGTATAAGAGTTACTGGTAATCTCCCTCG  
CTATACAAATACCGAGCAGAGAACGGCTGTATCTACAACCTCGAGTACCCAATGAAGGGCGT  
GTAAACCCTCCCGAAACCAGAGTTAATACTCCTGTTAGTAACGTGCCACCCCCGCCGCGAT  
AGGTAATTACATCCCCAAATCACCTGATAAAAATAGACAGGTAACCACAGAGACAACCCGT  
CCGAAACTCAAACCGGAGATGTGGCATGGAAACAAGGCGCTTTAGGCAGTGGTGTATGATC  
AGCGTCCGGTATGGTATATAAAGCGTGCTAACGGCAAGGTTGAAATAGTTTTCCAACCGCCT  
GAAGATGCTCCGAGGCTTGAAGGCACTCCTAAAGAAACGTTTTTTACTCGTGGTAAAAAACC  
TCCAACAAATCTCACTCAGGAAATGGGTGTCACTACTGCCAGATTAACCTTGAGCGCAACC  
CGAGGATTGATTTTCGTACCCACTAAGGCGCCCAAGTTTAAACCCTATATTCCTAAAAATGTT  
AGGCGCTCAATTGGTATGTGAAATATCTTGACTTTTTGCCATTGTAATAATTAATTTGGGTA  
TGGATGAAATTGATATTGTAACAATATGTTTGACCATTATAGTTGCTCTATTAATACTACCTC  
AGCTTTTGGCCATCATAGTTCGCTTCTTTAAAAACCATAATCAAAGTATTATTACGTCGCAT  
ATTATAATATAGCTGACTCCACGAAAATGATCTTATCCGGTCTTACGAGAATGTAGTGGAG  
TCCATTAACCATGTAACATAAAGCCTTATATTTTCAAGATGTATTCAGTACGAATGAAAAC  
TACAGACTTGTGTAAGGCCATAGATCAGATTGAGGCTGGAGCTAAATACGCGCGTATTTTGC  
AGATAAACCGCCCTCCCAATATCAAGAATTAGACCAGTGACAAAGTGTACAGATATTCGG  
AAGATATGCGAAAGGCCGGGATGAACCCGGCCTCTTTGTTCTTGGAGGTTAAAGATAATGA  
GGAATTATACTAGTAGTACCTAAGCCTGTTTTTCGTCTATTATAAGGTGATTGATTGTTAGGCT  
TTAAAGATATATCCTCCTTACCAGCTTTGTATATACTGCATTGAGAGTTCTCCCCAGCTTCA  
CAGCTATTAATCTTGTGGTGTATTTCCCTCCGACCAATACATTTAATTTACTAACATCTTCTTC  
AGTCCATCGTTTTCCCACTATTCTTTTTTCGAATCTTCCACTGCAAGCTCCTATTTTTATTACAAA  
TGGTCCGCCCCCAAATATCTTTACCCCTCAATTTAATTATACTCAGTCATGCAAACGTTTTT  
TAAAGCTTCAAATTATCTACTGGGCTTGCTTGCCGGTGGACTCTCATCATATCTTCTGTACCC  
AAAGTAGAAGTATAACGCCTGGTCATAGCAAGAGTAGTATGCCCCAACATGATTTGCAGGG  
TAAACTCATCCCCACCATTACGTAGATAGTTTATAGCTGCCGTATGCCTGAAAGTATGAGGT  
CCTGGCTTAGCATCAGTGATATTAGCCCTCTTACAAAGCTTTTTTATGGCTTCTGAACACCA  
CGACAAGTAAGTGGTCGACGTTCTTCTGTAAACCATAAACATTGATAATCATCATCCCTATTA  
AGCATATACTTTAACAAGGCTTTTTGGGTCTGTTTGCTATTTCGAACAATCCGTTCTTTTTGAC  
CCTTTCCCAAATACACGAACAGTTTCTTGATTAATAATCGATGTCATTAATTAATGCCGGA  
AATTTCTGCTAATCGTAACCCTGTATCCATAAACAAAAATATTAAGCACGATTGCGTAATC  
CTAAAAAACTTGTTTTAGCATTAAACACCCAATATTTTTTTTTATGTCCCAATTGAGAAGGGCT  
GGATTACTTTCTTATCTAGCCTCGGAGGTTTTAATGTGCGCATTGGATCGTTTGCAATATAAG  
CCTCTCTCATTAACCAATGTATAAAGGCTTGGAGTGCACGATAATATGCATTCACAGTGTTA  
TTCCCGCACCCTTTTTCTTGCAAGGATAACAGGAATGCCCGTATTAATTGAGGAGATATTTCA  
GAGGCTAACTGGAGACTGAAGCGATGACAAAACGACACAAAACAGTTAACACGCCGACGGT  
AAGTATCAACTGTTTTTGGAGATTTACTCTCTACTTTACATGAAATTAAGTAAAACTCGAGG  
AGCCTTTTTAATTCATTTGATGCAGGACTGTGCTCTATGGCACGAATGAGCTCATCGTAATTA  
ATGTTGTCAGGACTGTGCTCTTTCAATTCATTTTCGGCACGGGGAAGGCTGTTTTTGACTGTT  
TTTAGCTTTATGGTGGGCCATCTTGGTCTCGAACCAAGGACCTCAGTCTTATCAGGACTGCGC  
TCTAACCAACTGAGCTAATGGCCCATTTGATAACAATATAAACAACTCAATCTTGAGCTGT  
CGAATGCATTAGCAAGTGAATTACTATTTGAAAAACGTCATTATAATATAGCAAACAGGATG

CCTAGCGCAAGTCCCTTATCACCATGAACACTGATAAAACAGGGATAAGTTAAGCAGATGT  
GAGAGTTCAGGTTATCAGCTTTCAGGGAAACTAATTTATCCCCTTATAACACTAACACCTTA  
ACCTCTGGATAGCGGAAAGAAAAGCGAAGTATCCGTTTTAAGTCGGATATCGACCTAGGTAA  
ATAGGCACGAGGCCAATTAT

>Dmc\_IME1-10

TTTTTGGCTACCGGCGGTGCTTTTTAGCTTTATGGTGGAGCCGGAGGGATTTCGAACCCCTCTACC  
TTTTGACTGCCAGTCATCAAAGCTAAAACCAAGCACCACGATTACCTATCGGCCTACTCTAC  
TTCTCCTTAATAAACTAGTTTTTTATTGACTTCGATGACTACTGCACCTGCCTGGCATTCTTCT  
AAAGAATGAAGCCCATGTCCATTTTTTAAATATAATCTTCCATCTTGCTCTATTAATTTTCCT  
ACAATAACCTCTCCATCCACTACACAAAGGACTATATCCCCTTTTTTGGGGGCTCGGTCTCGG  
TCTATAAGGACAATATCTTCTCACTTATAATCGGCTCCATACAATCCCAGCTACTTTGTAA  
GCCTCTATATTTGGAGGAGCATTACTTTCCCTTGCTCTGTATATGTAATCAATTGGTGCTAAC  
GCTGGATCTCCAGCATGTACGATAAAATTATCATAACAGGTATAGAAACAGGAGCCATAA  
GTTGATATTTTCTTAGTACTTCTTCAGGTGACTCTATCCTAACTGTTTCAGGATATGATTTGA  
ACTCTTTGATATCAACACCAAGCGCTCGTGCAATTTTAGATAATGACTCATAACTTGGCATA  
GTACTTTTACGCAGTTCAAGCATCGAGATATAACCGCGAGTTAAACCACTTATTTACGCTAA  
TTTAGCTTGTGTAATTCCACGCGCTAGTCTTAACTGTTTTACTTTAATCCTATTTGGATATCC  
ATAATACCCCTCTGAAACAATAGTATCATAACTTGACCAGTATTTGCATGATATTGATAGGA  
AAATGGAGATAATAAGCAATGTACAATACTTTAGCATGTTGCTACTATGGTATTATTCGTTCT  
AACTATCTCTCTACGCCTTTGACTCTCTGCACATACTAATGCAACAATAGTTGTCATGAATAA  
CATCACTGTCGAATTAATCTTCTAGATGTCTTAATCAATTTACAGAAGGATATGAAACTAA  
GTAATACAGCTTTTTCGAAAAAGCTTGGCATTAAATCGCCAGTTGTGGCAAATGACTAAATCA  
GGTACTAGACCTATACACCTAACAGTACTTAAAGCCATTATCCGGAACCTCCCCATCTAAT  
CCCAAATGTAATAGTCCATATGGGCACTAAGGATATCAATGAAACTGACTAAGCGCGACTCT  
GGACGTATTGGGGGAATTCAAACCGCAATGCGCCATGGAACATAACATGAGGGAGATTG  
GCAAACCTAGGAGGCCGTCCCCGGGCTACTAACTGGATGGATTTACAGGTGTTACACATCAGA  
GAGAGAAAAGAGAGGGGAAGGAAGAGCTACCGACAGCCTTACACTATCTCAGTTAAAGCACC  
TTGTGAAAAATGCAATGGAGGGTGGCTACTAGTCCTAGCCTACCCTCCAGAAAGGGGAATG  
AGGCAATGCCTCAACAACAAGTAACCTATCGTATCAAGAACGAACGCACCGGTCAATGGTG  
GGAGGGAAAGGCTGATAGCCCGATAGATGCCATGCGGAAAGCCTCCCTCGAATACCCGGTA  
AAAAGCCCTAAGTCCGGCTGGACAGCTGAAAACCTGCTGGGTACGTCAATGGTGTTCTGCTGG  
TTATGGCTCATGGGTAACCCAGACTATGTCCGAAAAACAACAGAGATGGTGAAAGCATGA  
AATTTTTTCCACGTGCTTACCGCGTAGCTAAAGGAGAAATAATATGCCTTATAAAAAGATATT  
TCCCAGCAAGATAGTAAGTTTTGACCCTTATTTTGGAAATGGAACGTGATGGTCTTAAGTCA  
TTTATTACCGTCACAGCATTTTCTATGGATGCACCGGGCAATCTATTGTTGGATGAATTTAG  
AAGTCAGAAGTCCCTATGCTGATAACAGTCCATAATCCCCAAACCGGTCAATCATTTAATGC  
CTATGTAACCAAAGTTGTGCAAAATTCTCCCGCCTGTTACTGGAATACCATCCATATCGACA  
TAGAACGCATACTCAGAGCAGAAGAAACGCCAACAGCTATGGCAAGCTACCCCAAAAAGGA  
TGACCTTAATGACTAGTGGAAATGGTTATCTTGGCTGAGATACGTACCGAGACTGAACAAGGC  
CGTCCCGCCCCTACCACGGGCTGGGAATGGAGTCCGGGCTGTACCCCGCTCAGAGACCCTTC  
CCCTGGCAAATGGATTGTTTCGGCGCACAGCAGACAGCTTTGATGTGATGTTCCGCTCATATT  
TGACTCCTGAACTACGCAGCGGTGGCCCTGAATACTGGATAGGCAGTTTTAACCCTACTGAT  
ACGGGGGAATATGTAGCCCGTGAAATGGCAATCAAACCTACGTAATGAATCATAACCGACAGG  
AGGCTGAACGCAATGGCCACAACCTACGTCATCTAAACCAATTGAATTGTCACCCCGCCGCTA  
CCGCAAAGGTAATTATATGTTCTGCCAGTAAAAGCTGACCGCAATTACAAGTGCCCGGAGT  
GTGGTTGTCTGGTACAGCCAGGGGAAGTTGGATTTACCCGCTTTAAGATTATTCATGATCTG

GTAAGTGAACCAATCGGGGATGTACTGCATGCGTGCTGTGTAGAGGCAAGGGAATGATAAG  
AATTAATAATTGGTCATCTAACGCTCTCTGCGGACCTATTTCAATCCGGAGATGTAATTATTAC  
CTTGAGGACTGAAGATGGCACACCTGTTGCTGCCGCAACTCAAAGACACTTATTGCCGCTA  
TTGAGGCACTGGAGAAGACAGCGGAATAACATCCAGGACGGACAGGGGAGTGTGATCTCCC  
TCCCACCTCCCTGTCCGTCCTTAAAAACACAAAGGAGTGACATATGGTCGTATCAACACTGA  
GTAAGAGACCAATTCTGCAAACCTACCCTTGTACCCACTGCGGCCGGGAGACCGAATGGGA  
TTTTGACCTGGGCTCCAATCCACTATGCGCATACTGTTGGGACAACAGTATAGAAATAACCG  
TCAAGGTTGAGCTGGCTGATAAGATGCGTGCCTACTACCAGGAGCATAAGGTTGAGCTGGCT  
GATAAGATGCGTGCCTACTACCAGGAGCATAAGGTTGAGCTGGCTGATAAGAAGCGTGCCT  
ACCGCCAGGAGCATAAGGTTGAGCTGGCTGATAAGAWGCGTGCCTACCACCAGGAGCATAA  
GGTTGAGCTGGCTGATAAGAAGCGTGCCTACTACCAGGAGCATAAGGTTGAGCTGGCTGAT  
AGAAGCGTGCCTACTACCAGGAGCATAAGGTTGAGCTGGCTGATAAGATGCGTGCCTACC  
GCCAGGAGCATAAGGTTGAGCTGGCTGATAAGAAGCGTGCCTACTACCAGGAGCATAAGGT  
TGAGCTGGCTGATAAGATGCGTGCCTACCACCAGGAGCATAAGGTTGAGCTGGCTGATAAG  
AAGCGTGCCCGTTCGGCTATTTCCAATTAAGTCTGAAATGAGGTCCAATATGGTAATAG  
CAATACGAAAATATACGATAGACGATATCCTTGCCCGACTTCAGGGCGTCAAAAAGAATGG  
ATCCGGCTACATGGCCTGCTGTCCTGCCCATGAGGATAAAAACCCGTCCTACTATCAGTATGCG  
AAAAGAGTGGCAAGATTTTGATCAAATGCTTTGCCGGATGTAGCTATGAGACGATCATGTCC  
GCGTTGGATATGCCTGTTAATGATGCAATGCCAAAACCTGCCAAGCCATCCAACGCGAGAT  
AAAGCAGACCTATGACTACACAGACAGAAGCGGCCAGTTGATATTCCAGGTAGTCAGGTTT  
GAGCCAAAAGTTTCTCCAGCGACACCCTGGCGGCAAGACCGGCTGGCTCTGGAATATGA  
AGGATATCGAGCCGTTATCTATCATCTGCCGGAAGTGCTGGAAGCGGTAAAAACAGGCCA  
AACTATTTGGATAACCGAGGGCGAGAAGGATAACCGATAACGCCAGAGCTATGGGCTTGGTG  
GCCACAACCTCCCCGATGGGGGCGGCAAGTGCGCGATAATTATACTAATGACCTGCTGG  
GAGCCTCTCAAGTAGTAGTGATTGCTGATAAAGACGCTCCGGGCCGTAACATGCCTCTGAT  
ATTGCCATGTCCTGCCGGCGGCAACGGATAACCGGTCAAATATAGAGGTACCCGGCAATGC  
CAAGGATTTTACCGAGTGGCTGGAAGCCGGCGGCCAGATATCCGAGCTGGATGACCTGGTA  
GCTCAGTCAAAGAGTTACACACCGTCAAAAACAGAGCTTATACTTTCTGTCTGATGGCAA  
GTTCAAGTATTGAAGCCGGCCGGATTATTTATCATTCTATAGGGACAACATCCCTTACGATG  
CTCCGCTGTGCAATTTTGTAGCAGCTGTTAAAGAGGAGATCATCAAAGACAATGGCATAACC  
CGCAAAACTTTCTCAGGATTGGAGGTACAGACTGTACTGGCCGCCCGTTTCCAGATATCGA  
AGTACCCAGTGAAAACCTTTCTCTATGTCCTGGGCATTATCCCAATGGGGAATTAAGGCTA  
TGATCGAACCAGCCCTTACAGCTGAACGGCTATTACGTGGGGCGATGCAGTACATGTCGATG  
GAGGCACCCTGCCGATTATTTATGAAAATACCGGCTGGACTAATATCAACGGTAAGGATGT  
TTACCTTACTCCCCACGGTGCGATCGGTGCCGATAATGTTGAAGTGGAAATGCCATCCAATA  
TCAGCCATTACGATATAACCCTCGCCCGAACAGAATGACGATGTGAAGTCCTTTATCGAAGCC  
AGCTTTAATTTCTCAAAGTAGCCAAGTTATATATTACCTTACCTCTGTTTGCAGCTATGTAC  
ATGACGCCTTTATCAGACGCCATTGATACTAACTTCAACCTCTGGCTGATTGCTGGATCCGGC  
AGTCTAAAGACCACCATAACATCACTGGCTCTTTGTCACTACGGAGATTTTACTATAACCTGT  
GTGCCGGCTGCTTGGCGGGATACTCAGAATACACTGGAACGCATCCTGTTTACCTGCAAGGA  
TATGCCAGTATTAGTGGATGACTGGTCACCCGGCCAGACCACCGCCTCACAAAAGAATTTG  
ACGCTAAGGCTGACTATGTATGTCGCGGACAGGCTAACAGACAAGGCCGTAAGCGCATGTC  
TGCCGATACATCTATGCGGCAGGAATACGTACCGCGAGGCTTTCTGATATCCACCTCGGAAG  
GGCAACCGCCAGGCGAGAGCAATAATGCCCGTTTTTCTGATCATTGAAATGTCAAAAACAGA  
TATCGAATTCCTTGTCTTACCCTATCACAGAAAGAGGACCATCTGTACCGCCGCGCTATGG  
CTCATTACCTGGCATGGCTGCAAGCGGACTGGCCGGCGAAGAAAGTGTATCTGCGCCAGCG  
CTACCAAGAGGTTTTTGAACAATTTACTGAGAGTCTCCGGGGTGAAAATGTGCATCTCCGGC

TACCCAGATCCATCGCTCTGTTATATATCGGTCTGGAAATGGCTATTCGCTGGGCCGAAGAA  
AACGGAGCAGCGGATATATTTGATAGGTTTATAGATGAAAGCGGAAACGGGGAGAATGATT  
CAGTCGGGTCTGCGTATCTCTTAAAACAAGCCCGCAAGTATTTATTGAGATGGCCAAGCGA  
CAGGGTGCCCGGATAGATGAGGCTACACCATCGAAAAAGTTTGTAAACGCCTTAAATGCAG  
CCCTTATAGCTGGTACTGCATATCTGGATGTTAAAGATGGGGCAAATCCTCGGTCTGCTTCA  
CCTGGGCAAACCTCTGATCGGTTGGGATGACCGGACTAACGGGCACGTTTCCCTCCATAATGA  
CCTGGCCTACCAAGTAGCCAACCAGCATTACCAAAAAATCAATGAGGCTTTTGTAAAAAAG  
ATGCTGTATTTATGGATCTGGTGAAGCGTGGTTATGTGGATCCGGGTAAAGATGGTAAAACC  
ACTGTCTTTGAGTATATCCCGGTAATAGCAAAGGCATGCCGTGTCCTACATATCAAACGTGA  
ATTCCTGGGGTGGGATGAACAAAAGAGAGGTGAGTAAAACAATGAAAAAATGTGTGTCGCC  
CCAAAAATATCCCATGTATTA AAAAATGGTGCAAGAAGTGCAAGAAAACCTGTTTTAATCG  
TAAGCCAAAAATATTCTGAACGTGAAATTTCTTGACCTTGAGGGTGCAAGAGGGTGCAAG  
AAGTGCAATACAGGTGCAATACAGGTGCAAGAGAAGTGCAAGAAAAATATAAAGCTAAATTA  
AAAATAGGTGCAAGAGAAGTGCAAGAAAATATTA AAGCTAAATTA AAAAATACATACTCGTA  
ATTGTCAATATTTCTTGACCTCAAAAACAATATATATCACTCAGTTTTAGGGTGACACATAA  
ATCGGTATGTAAGATTGTTAAATCATTCTCAAAGGATGTGACATAAATGAAAGTCGCGTTAT  
ATGCCAGGGTAAGCACCCGCGATAAAAATCAGGATCCGGAAGTCCAACCTGATGGAGCTGCG  
GAAATATTGCCAGGAAAACGGCATGGAAATAACCAGGGAATATATAGATCATGCCTCGGCC  
AATGATTTTCGTCCGCAGGACGGCATGGAAACAGTTGTTAGCGGATGCGGCTACTCGAAAGTT  
TAAGGGATTACTGGTGTGAAACTAGACCGGGCATTCCGCGACATTACGGTGGCCACCTCGT  
CCGTTAAAATGCTGCGCAATGCCGGCATAGATTTTATTGTTACCACTGTCCCTGTTCTTTCAG  
TCCAAGGTCCAGCTGGAGACCTGATGTTTAAACATCTATGCCGCTTTTGCCAGTTTGAAAAG  
GACACCATTATTGAAAGAGTTAATGCCGGACTTTCAAGGGCAAAGGCTAAGGGTAAGGCAT  
TCGGTCGCCCAAGAAAGGCAATAGACTTCAATAAGGTTTTGGAAGCCCACGAGATAGCCTG  
CTCACGGGTTAACCGGATTACTAAAGAAAATCAGGGTTATTCCGAGACGGCGAGGATATTG  
AGCGAGCAGACCGGGCTAAGAATTACAGCCGTTGGGTCTATAACCGGATAAAGGCCGGCA  
ATTA AAAATGCTTCAAAAAACCCACCCCATTTTTGCATAAATTTTAAAGCCAAAAATCTTAT  
CGGATGGGAGGCTTCAAAAAACAATGTTTTTTGAAGATGTTGAGCTACTAACTTGATACCC  
ATTATTCAAAGAAAGTCCAATTTGAAAGGAATGGCAAATAAATGAGACATCTTAAGGCGGT  
ATGGCAAGGCGGTTTTATTATTGAAGGATTACGTCCGAAAAATAGATTACACGAAAGCCCCG  
GAACACATCATTTAATAGTCACAAAGGCGAGCCCCCAATTTGATGACCAGAACCTTATCGGT  
AAAAGAGTAGCAATCCAGTTTGTGGACCTATGTATTGGGAAGTTATGGAATAAGCGCAA  
AAACGGCAAAAATAATGCCCTGCTTAGTGGTTTTATTCAAAGGTAATTGTGCTAAACCGTA  
AGACCCCAAAAATTCACAATTGTA AAAAACACTGTCCTATCTGACTAAAAATATACTAAGGGA  
AAGGAAACGAGATGAAAACCTGTATTA ACTAAAATTAAGGGAGTCACGCCATTATTAATGCA  
CCGATTTCCCTATGGCAGGGGCAGATGACACATCAAAAAACGTACGGGAGTACCGGATTGG  
AAGGCAGAGGCTGAACTAGCGTTATACAAGGATGATCATGGGCAAATTTATCAGCCAGCGA  
GTCATATTGAAGCCTCGCTTAAAGAGGCTAGCAAAACATTA AAAATACCAGGCAAACGAGG  
GGCGACCTATTCAAAACTCATTGGTTCCGCTGTCTCTGTTTTCCCTGATGCTATCACTCATT  
GGTCCAGGATTATGAGATAGATAGTCGCCCTGTTGTGGTACAGAAGGCAAGGATAGTGCGTT  
ACAGACCAGTATTTAAGGATTGGGAATTAGAGTTTGACATCAATATAGGGGATGATCAAATC  
CCTATAGAGGTTATCAAACAGGCTCTCGATCATGCAGGGCTATATGTAGGTATAGGCGATTT  
TCGCCAGGACGTGGAGGGGAAATTCGGCAAATTCATGGTTGTCAGATTTGAAGAGAAATAA  
TATAGTCCGTAGCCCTGCGGGTTAGTCAGGTGAGGTATGGCTCGGCTTGGTTGGGCGTGGTA  
TGGTCAGGTACGGTTAGGCACGGTATGGCAGGGTAAGGTTTTTAAAAATTACACGAGAGGA  
AAACTCAAATCTGATCTTGAATCGGGAGTTAAAGAAAACCTTCTTACAGCTGTTGGGAATAA  
ACACAAACAAAGAGTAATTAGGAGAGGGCGAAATGGT TACTGAAACGAAAGGGATATACG



AATTCAGCCTGGCTGTAGATGCCATGACCTTGGGCCAGCTGGGCCAGGAACTGGATAAATGC  
AGCCAAGAACTGGGGGGCTGTGAATATTGCTCACAACAGGCTATCTGTTTGGATCTATGGCT  
GCACCTGGCAGATACGGTAAAGGATGATTGTGCGTTAACTGCCCGGCAGTACACTGTATATG  
CTCTAGATTTTAAAAATATTAAGGCCGACGGCAGATGATCCTGCCGTTGCTTATCGCCTAA  
GCGCCGAATAAAGACCCCAGACAGTACCCGCACTAATAGGGAACAGGAAAAACCATTTAAC  
AAGTCCGGCTGTACCTTCAAGGAATGAGTAATTCCAGAATAGTAAGCGTGGTATCGCATACG  
TAATAAACCCATAAATACCACCTACCACATTAACAACCGTAACGAACAAATTACCGATGGC  
ACTATCTGAATACTGCATAACCGAAAACCCAAGCAGGGCATTGAAAAATGACTGTTCTGGGT  
CTCCAAGCCAAGTCCCCTCAAATATCAGGCACATTACTTGACCTATGATATAGCTATAAACA  
ATCCATACCAGCCATTGCGGTCTCATTAGTAACTCGCCAACCTTCGATTTGTCATTTACCCGA  
TAATCACCACTGCAACAGGTACCAATACCCACCATGGCACACCTATAGTCGCGCACCAGAA  
GACTTGCCAAATGAGCCCTGCAACTGCACAGGGTAGTAATTTACGCGTTAAACCAAATGATA  
GGATAGTAATTATGGCCCCGCCGCAAAGCTAGGCTAAGCCAGAGAAATGCAGATGGGAA  
ATTCATCTCTTCCAGAAAATCTGTAATCTGCTGGCCACCGGGCAGGTTTTCCGGATGCAGATT  
GACATAACCCCGGTCCGCATAGTACCCAGATCATCGTCTGTCACAATCTCAACCGCATCTT  
CGTCATCTCCACAATGAAGGCTGACTGGTTGCAGGCAGCATAATTAATCACGGCCACGCTC  
ACATCTGCGTCAGTGGTTGTTATCCGGAAGGAAGGAGTAGCATCATTGCTGTTCCCGGACAG  
GTCCGTGAAAGTAGCGGCGTATTGCCATTCCCACGAGCCTTTTAATACCCCGCCCACTGTTAT  
TTTGGCATAGTACAGGTAAGGCATCGAGCCGTTAGCCCCAATAACCAAGTTGTTAGCGTTAT  
CAGTAATAGAGACTGCAAATGCGGCTGAGCCCTCTAAGAGACCATCTATATAGATATTCATC  
GTGCCTGCAGATAAAGATATCTTATATACATGTTCTGAACTGGATATATCCGCCGCCGTAAC  
GATTGTATTATTTGCATTTCTGTTATTGATATATTTATGTCTGTTGTAGCAGTGCCACTCCAA  
CTAGACCCTGAATTATTTGTAGTGTAGTATCTGCCGTTAGCATAACGGATTAGTAGGGTTATAC  
CAGTAAGTTAATTTACTGGAGTCCCCGTTTGGGAGTGACAAGACTATTGCATAACGTGT  
TCCGGCAGTTAGATTAATTATATTGGAAAAATCAAATGTATGATTTACAGCAGAAGTTGAGA  
TAGTTGAAGCTACCACCGAACCGCTAACCAAGGCACTTCTGTTGGCACATCGCCGCTAGTT  
GCATAGATGGCATAATTAATAATTTCCAGTTGGATTGCCTACTCGTTGTGTTCTAAAGGTA  
TTGGTTGACAGCCACATCATTAGAAAATTGAAAGGTCTGTGCTATCCAGTTAGCACCGTACA  
AAGATGTAGCTGAAGCTGTAGTACCATTATATGGAGTTTCTGTATAACTTGATGAATTACCT  
GCCGATACATCTGTTCCAGACGTATAAATCCAGAATGCTCCAAATTTAGATAGGTTATAGCC  
ATCATTAAATCTACCACTTAGCTCAATCTCAAAAATCATTTCTAGCTCCAAAGACGCAGAAT  
CAACAACGCTCATACCGGCTGTGTCAGGGAAATAGGCCAGTTTGGCCCCCATGGCAGTGTGCG  
CCGCCGTTATAGAGGTTGTAGTTAATAGCGGAGTTCTGGCTGATCTGCTCAACCCACATCAT  
CCAGGGGTTGCTGCCATAACCGGGCATAAAGGCAATATCTACCCCGCCGGAGTCTCTTAATG  
CCAGGTTAGAAAAGTCTGGATCTATATAATAACCATCCAGCAGGCTCTGGGAAGACCAGAT  
AAATGGCACAGATACCTGCTGGGCGGTATAGCTGGCATTGTGGCCCCGGATATCCGCCATAT  
AGATAGCATCCGTAATAGTTGAGGCCATGATCGGTACAGCCCCTGTAATGGCCACCAGGATA  
AAAAGAATAACAGATACCAATAATTTCTTCATGCGTGCCTTCCCATAAAGACATAACCGGTG  
TAAACGCGTAAATAATGGTAATAATCGCTAGGATAACCCCGTTAATAATCCCATGGCCGT  
ACCACCGCCAAGATATAGGAACCGGCTATCATAGCCGATTGATTATCCGAGTATTTAAATT  
GTGACCAGCCAAATAAACTACTACTAGAATCAGACACAGCAAACCTGGTAAGTATCTGCCA  
GCTGACAGCATTATTAATATATCAGCCAAACCTGTTAGGGCATCACCCACCACAGTGCCAT  
TCCATTGTTCTGCCAGGTAGTCAGCATATCAGTGCCCCATGTCCTTCTAGTAAGGTCTAAAC  
CTTGTGCTTGGGTGGAATATATCTTGGGGCACATAGTCTGTAATCCGGGGATGGTTCCATTA  
CCATAAGCAGCTCCGTAGTCATTAAATACCGTCCCCTGGTTGGTTTCGGTCAGTAATTTAACT  
GACCAGTTAATCTCCAGAGTCCGGCAGACTGCTATAATCCAATTACCCATCAGGGATTGATT  
TTCTTTTTTAGTAGATAATTGGCTGTAATCGGAGCCAGTCATAGTGTAGTTAACCTCCGGAGG

TGTCTCCCAATACTGAGGGTTCCCCACCATTTTGTAGTATCAGAGCATCCTCCCAAGTGGGAG  
CATCAGCAGCTGCAAAATAGAAGGCCGAATACCCCATGTCATAACCGGCGTTGTTATAGGC  
ATAAGGCTCAACCGCTCCAGTTGGGTAACGCCATCTGTATCCATAAGGCGGAAATGAAAG  
AGCTTGTGGCTGGAGTAGTTGGCTGCCCTGATGAATAAGTAATAGTGTACTTGAATGCTAT  
CAGGGTATCACCCGTCTCAACAATGTTATGGACCGCTTGAACATCATCCAGGGTATAAGTAG  
TTGGAGTAGCAGGGTCAACAGCCAATACTGGAGCAGCAGTAAATAGCGATAGTATTATAGC  
TATTACTGTTGCGAGGGCTGTTTCGGCTAAAGACCTTCGTATATCTTCTGCGCATCTCTTTATC  
ACCATGAACGACAGGGGGTACGGGGAAGGCATCGACCACGCCTCCAGTTCAGCAATGTAT  
TCCTGTGTACCCAGCGGGTTTTGCAAGTGCCTGGTACTGCGGTGCCAGTGCAGCAAGAATA  
AGTTCTATATCATCTCTAAAGCCTGAGATATCTCCCATCGCTATACCTACCACTGTTAGCCTG  
ATCGGTTTTACCCTGTCCTGTGTTATCTCCATGCTCTAAGTCTACCRACCTCTCAAATTAAGT  
AAAGGCAATTCAGGTGTTAAGGTATTTATTAATTATTCATATACCCTCAGTGATTTGCGA  
CAATACGTTGTGCGAATTGGGAATTTAACTGGTTTATTATTCATCTCAAAGCCAAGTTTGACT  
GAAAGGAGGTGAATAATTTGAAAGTATTTGGTGCCTTGCAGGCTATATTTGGAGTCATCCTC  
CTGTTTAACTTCATGCCAAATCTGACTAACTCTACCCATGATCTACAAACGGATGCGGCTAC  
CCAAGCTTTTCTGCGGTGACTACTGGAGCCGGTGAGACAGCGGCTGATGTAGTACTAACTA  
CAGATCCTTACCAGGACCGCACTACCTCAATAACTGGTATTACATCGGACAATGTATTGGAT  
GTTGACCCACTGGTTGCCGCCACTTATACCACCGCTACTAATACCCTACATGTCACGGGTCTG  
GTAGCTAGTCAATCACGCTCTCTGACCATCGCTTATGAGACTGATGCCTTATCAGACTTTACC  
ATGATGGGCACAATCGTTGGTTGGACACCGGTTTTGATTGTAATAGCCGTTTTAGCAGTTATT  
GGCGGCACAATTATGGCCCTGATTCTCGGAGAGCATAATCTCAACATTTTAAACAAATTAG  
TAAAGAAAGGAGGTGAATTGAAGTGAGTAGGATGTTAAATATTGGTGGCGCCATACTCGGA  
ATCATAGTTTTGGCTGCCTTTTTCCCCGAAATGACCGCCGCTCTTCAAACGCTGATGACCGAT  
GCCAATATAGCCGATTACACCATGTTGAAACAGTCTGGGTTGGACTCCGGTCTGCTCTG  
GGGCGGCGCTCTCGGTGTTGTAGGCTTCTGATTGTCAAAGAAGTCAAAGCTTCCCGTGGTT  
CCGCCGGCCATTCTGGCCGCCGCTGCGCTAACTCACTTTGAGCACCTATGTTATTTGGGCAG  
AAAAACGAGTACACGGAATCCTTCTTTTAAACAGAAGACAGCAGGTGTTTGCCATTACTCCT  
GCCCCGAGACGTAGGATGCGTCCGTGATGATAAGTCGATGCAGGGATGGGCATTGCTATCCG  
ATTGCTGCTTTCCTCAAAGAAAACCTCAAATTCCTTTGAGTTGGTATGCGAACGTGATGTA  
GTTCCCATCTCTGTATCAGGCGACACAGCTAAGCAACAGAAAAACGGTAAAGACATCGTCA  
ATCAAATAGGCAGAGAACGCCGTAACAAGCTCATTTTCATGCTGGATCCTGAACTTAAAAA  
GGATAGGGCAGCAGATATCATTGACTCTTATCTATGGTGGAGGTGCCACTTTGGTTTTGA  
TGATGATTGTCGGGTTGTTTTCGTCAGGGAGGTTAAAATGGCCATTCTAGGGAAAAGGGGCA  
GCACTGTCACAACCCGTACTGTTAATAGACACCCGGTCTGGTTGGGATATTGAAAATATA  
GATTCTGAAATCATAGGTCAATCATGGAACGCTATTTATATGATGGCAAATGGCTGCCAGT  
GGTTATTCGTGACTATGCAAATGATGGTTCCTTATTTATAAACCTCCGATATTGCCAGTAGG  
TATGGCAACACCTCCTGAAAAACTCTACCGTGCCTTATAGCCTGGCCCCCTGTTGTTAAAC  
GTTTCTGTAAATCCATGAGCGATATTTGGGGAACGCTAAAAAAAGGCGCCTTAAATCGGTTTT  
CTGGCTGCTATCTTGGTGGCCTTGATTTTGTGTTGGGTTCTATGACTGGAGGATGAGATGGT  
GAAGAAAAATAACAATACAAAAGAAGCTATTGAAAATACGGTACCTCTCGAAGCCACAGGT  
ATTACTGAAAATCTACCGCCTGAAGGTACTTTTGTATGCGTACCAGCTCCCTCTGGTGGTCTA  
ACTCGGGAAAAACTCGAAGGCATGATGACTCAAACCAGTATGCCATCTATCGTGCCTGAACT  
ACTGGAAGCTGGGGATGATCCAGAAAAGCTTTGGATGCGCACGATAATAATGAACAGTAAG  
TCAGCGGAGGCTGAGAAAAACTCGACGCTGCTCTTGCCTATTTTCGATTTATGCGTTGAATT  
TGATGATAACAAGGTATGGATTATCTGAGACGCAAGCTTTCCGGTTGGGCATCAATTAATG  
GTGCGGCTCGGGAACAAGCCGTTGCTGCGGTTACCGGTGAACGTTTTAGGACGCCCAAGCCT  
GGGCAAAACGGTAACAATCCACCCCCACAGGTAAAACCTATAATGGTTGCTATTTGGGTTTT

ATTGGCCCGGAAGGCGCTGGCAAACACTACTGCCATGACCTACTTCATGGAATATCATATGGC  
ACTTGGGGGTGTTTGCAGATCCTTTCCGGGCTATACCTTGTATAGCCCTAAGGGCAAATTGG  
TAAAGACATCGATCTTAAAGAGCTTATGTTGATGTCTGGGGAGCTTAAAAATGTTGTTGTG  
GGAATTGACGAAATTCAACAATTTAATGACTCGTCCCGTCATATGACCACTATCAACCAGCT  
GACAGGCTATGTTGGCATGCAACGTCGCAAGCTTTCTCTCGGCATCTTTTATACCTTGCAGAA  
CTGGATGTGGCTGTATGACCGCATGCGTTGGTTAACTCATCTTTTAAACAGTATGTTCTGATCT  
GCACTTCTCTCCCTGGGGTAAGGAAAACCATATACGGCAAGGGCAGTATATGTCTATCGTCA  
CTTACGATTGTAAAGGGTTTTTGGACTGGCCAGCCATGGTCTCAATTATCTCCCATGGTATTAC  
GTCCTCAAGAACTTTGGCCTTATTATCGCTCTTATAACGTATTGGATATTTTCGAAGGTCAAG  
AGCGTATCCAGATCAAAAAACGCTGACCGTTTATGATCTTAAATAAGGAGAACCCGACCATC  
GAACAAATTAGAGATGCGGCAGATCAAACACCTCCGGTCGGATTAACAAACACCACGAATGA  
CCGATTATGAAATGGCAGTATATCAGCGCTTGGCTGACCAAGGTGTTGCTATGAGTACTATC  
CGCGAAGTTCAAAGAATGAAACAAGGAGTGTAATTATGACACCTGAAACTGCTCAAATTAT  
TGCCGATGCCATTAATCACTGGGGGCAGCTCTCGGGGCAGCTCTTGGTGACTCTATGAGCG  
AAACAGTCAGCACGGCCATAAACACAGGGTTTTTAAAGCTTGGCGGCTACGTTAGTAAATGTA  
TTGGTCATGATAGCTGTGGTAGCTGCGGCCTTTATCAAACACGATGCTTGGCTCTATATCCTG  
GCAGGAATTTCCGTCACGCTGTATGCCTGGGGACAAATGGACAGTGGCATTGCTGGGAATAC  
TATATTGCAAAATTCTCCGTTAATTATGCTGGGTTTGTATCTAATCGTCTCGGCCGGAGTATA  
TGCATTCCAAAGTCTCCAGTCGAAGCATCAAGATGGAGGTTAAATTATGGGTATATTATTAG  
GTCCCAATCAGGGGTGAGTAAATGGGCTACTGCGGAACGGCCCGCCTACACCCCTAATAAC  
CAGGTGGCCATTAATGCCGCCGGCAAGCAGCTGAATCAGGTGTTAATAATATTACCACAGT  
TAAGATGCAGGATGGCAAATGGACAATTACCACTGACGGAGCTGTGTATAACATCGATACA  
AACGGCCAAACAGCAGATACCGTGCAGTATATAACCAATTATCTGACTAGCCGCGGGGCAT  
CTGCGGATATTATCAAATCAGTTACAGAGCAGATTCCCATTAACACGACACGGGAATCTGGA  
AACGTCGTTAAGAAAAAAACCAGTGCAACTATCACAGATCCTAATGATACCACCAAGAAAT  
ACACTGCTGAACCTGTAAATGAACCAGCAAATGATTCTACCGGTGAAGGTGATACTCAAAC  
AACACCGATGTTTCGGTACAGTGGATAATTCTACGGCATGGACGTTTACTACCCCTAACGG  
CACAGTCTACACCGTGCCATGGCGGGCTTAGCCTGGTCTGACCCTGCCAAAATGCATGAAT  
ATATAACAACTACCTGAACAGTATCGGCGCGCCCGCAAATGTCATCATGGAAGCTGTTAGC  
CGTATGCCGGATGTAATGGGGGATACTGGTTTAAAGAGAACCCCGGACTGATGAGTTTGGTAA  
CCTGATAGACAATACTCAAGAGATTAAGGATATTATCGCAGGCAGTGACCAGTCTCTAGCTT  
CTATAACTGCCTTAAAGGCATTCTTAGATGCCAAAGGCTTTTCCAACCTGTCTCCTGAAGAG  
CAATTCAATAAGGCGATTGAGTACGGTTTGATACCGACTGATTCTGTCTATGTACCGCCTGA  
TGCCGGTTATAACGTAGGTCAAACCGCACCGCCCGGAATGCCTGATGATGTAGCCGTATCTT  
TGGGGCTACTGCCATCTAAAGAACAGATTGCATATAACGCCCCCAATTTTGACTGGGCGTAC  
CTTAGAAAGGCAGATGCAGATCAGTACTTTGCCGAGCTAAAGGAAATCGTTGGCTATGACAT  
TACCTCGGCTAACCTCAAACAGGCTATGCGTGAGGCTCAGAAAATAACTACCAGGCAAAT  
CTACAGGCCAGCTCTGTAGCTATTGCCTTGAAACCTTTTATGCGTGGAGAAGGAGATAATCA  
GACTATTGATATCTTCGCCGCCTATAAAGCAGGTATCCCGGATAGTGTTATGGAAAAGGCCG  
TTGGCATATCAAAGGCTGATTCTATCGACATTAAGTACATGCTGAAATACGTTGATGATTCA  
GGCAATGTGGATATCCAGCAGGCTGTATCTGACGGCTGGGGGAAAGGTATCTTGCAGAAGT  
GGTTCGGGCTGTCTGATGCTGACTTTAAAAACGCTGAGTTTGCCCTGATTACGAAGATGCA  
AACTTCTTAGAGAAAATCGGCATGGCATACAAAAAAGACCCAGGTGAATTCTTAAAAAACG  
TGGGTATTTCTATGATACCTTTCTATGGTACATGGAAATTCAAAGATGATAACCCTGGTTGGT  
TAAATGCTACAAGTTTAGTTTTAGACTTAGCAATCTTTATACCTTTTGTCCGGAGGTGTTCCG  
CTTTAGCCAAAACCTGGTATTGGTGCAGGTAAAGCTATTGCCAAGGAAACACTTATGACTACC  
CGTGGTTTAGTTATGGCACCTATTACAACCTGCTCTACATCCTATAGCTACCACTAAAGCCTTA

TTCTCACCTCTGGGGGTATTACTCAGTAAAGTTAAGGTGCCCTCAGCCATATTCTGGCGCGG  
AAATAGGAGTGAGGTGTTTGATATTGCTAAAATAATGGCTAATCCTGCCTCAGTCGAAACAA  
CAAAGCCATGGATAGAGCTTTGGTACTCAGAAATGAAGGTAAAGCATCTGGTTCGGTTCCG  
ATTGTAGTTGACGGCACTGAAATAGGTACTATCAAATGGTCTGATGCTGGATTCCAAACGGT  
ATTCCTAAATCCATGGGGCATTCTACCCCGTTTGGAGAGCCGTTTAAAGCTGGCATGACAG  
TTGATAAAGAAGGGCTATATCTCTCCCCAATATGAATCTTGGTTTGACTAATGCTAGTGCAT  
ATGGTCGGGTACCCGGTTATGTCTTTAATAATAAACTCTGGTTGGCTCTATTGGTGATGGG  
GGGAAACTGCTTGGGCAAATGGTAATGTCATAGGTAGAGTTGCTGACAATTCACCCATCTT  
AAGGAATGGCAGTGATAAGAAGTTAGGAACACTGCTTTTTAAAGATGATAAGCCTTTCATCA  
ATATCAATGGCCGAGATATAGAAATCAAATATACGATAGCGGCGTTGTTACTTATGCGAAT  
GAAAAACAGATCATTGGTTATTTACCACAGGGAATAAGTATACGGAGAGGGCAAAGTTA  
TAGTCGGGCAAATCAAAGAAACACCTACTTTCGCAATCATCCATAATAACGGGCTTTCGCGC  
CTGCCAAATGCAATTCAGATGTTAAGAATATGCAAGAAATGGAACTAAAGCATGGCAAT  
ACCTGAAAACCGACAAGGCAGTAGGCAAACCTTATCCTGTATTTAAACAATATCTGGACTGG  
ATAGAAGATGAAGCGGTAATGGCTAAAGGAAGCCGCATAATTCCTGATTAGACGATAAGG  
GCAAACCTGTTGTTTTGCGAACTGCTGGGCCAGATGGGCGGACTATCAGCGTCCCCTTACTC  
CAAGTAGTCACACCAGATTGGTTTAAAAAAGTTTAGAGATTACCAGAGCGCTTGCCGGCA  
AAGCGGACACTCTTAAACCCCGCCGCTCTCCAGGTGATAAACAAGGTAGAATCACTCCCC  
AGAGGAATGGATGAGGACTTCATATCTTATATGCGCAAGAATCCTGATAATGTACTCTATGG  
CAGTACTGCTGAATATACATTCACCGGGGGCAGAAAGCCCGGAGACTTAGATATTCAGTCTC  
CTACCCCGGAAAAGACAGCCAGTGATATTGCTGATATAGCCCGCCGCTATACTGCAAATGAG  
GTAAAAGTAACTAAAGTGGCCACCCACTATACAGTATCTCAGCTTAAAAATGGGTTGTGGAA  
AAATATCGCTGACATATCTGAATTAGGATGGAAGAACTCGATGCCGGGTTTAAAAGGCTG  
AATGCACCTATCAATACAGTAAAGGTAGAAGGCATTACGATGGAAGCGCCTAGTACTCAGC  
TTTATAGCCTACTAAACCGAACTGTATCCAACCTTTGAAAAACAGGACCGTTTACGGCTATG  
GTAAGCAAACCTGGGAGGCGAACTTGATTTGGGCATTGGAGCCAAAGCCCCCTCTCTGGCAG  
ATTTGTATAAACTAAAGGCCAAGGGCGTCTACAATACTGTCCGGGATATCTTTGTGCCAAAT  
CTGAAAAAGAAAATCAATTATGAAGCCTTGGCTAAGTCTAACCCGGAGCTGGCCGGTAAGA  
TTGAAAAGGTCTTTGCCTCCGAAGCGGATACTCAAAAAGCTTTACTGACTACGATACGGGAG  
AAATCCCCAAAATTGGCTGATAAACTGGAAGATTTGCTTGCTGAACGGAATATGTCAAATGC  
AGCCCGCTTGGAAGCTGCCCGGCAAATAGCACCGGATTTAATAACCTGAAAATAAAGGAGTTG  
CTGCGTGCTGAACAACGGTCTATGTCTGCCGCCCGTATGGCCGCCATGACGGCCGGAAGGGA  
TGGACGCGCCAGTGCCATAGTAATAGCCGGCAGACTGGCAAAGTGGCGGCAATGGAGAAA  
GCCCCGCTTGAAGAGGAGATAAACCGCCGTGCCAAGCTGATAGAAAAAGAACTACGTAAAT  
TACCGGCACGTATGCCGGGTGTTGGTAATATGAGCAAAACCAGAATTACCGCTACAACACTG  
GAACGGAAACTGCGCACCGGTGGGGGCGATTATGCCAGCCTGCGCAGCCGGATAACCGCCAT  
CCAGAGGGGAAAGAGTCCCACCGCCGAGAGTTCTACCTTAATCCGCCGGATAATCCGCCT  
CCTAGGGTCGATCCTCCGCGCATTACCCCGCCAGATTTTAACTACAAACGAGAGAAGGGCAG  
AAATGACAGCGAGGAAACCTCACTTAATGCCCGTCCAAAACCTTAAAAATGGGGATGTAGCC  
TGGAACAAGGCGAACTGGGTGCTGGTGATGATAAACGCCCTGTTTGGATAATAAAACGTG  
CCAATGGCACTCATGAATATGTTTTCCAGCCACCGGAAGGGGCAACCCGATTGGAAGGCAC  
ACCTAAGGAAACATTCTTTACGCGGGGTAAAAAACC GCCTACCAATCTGACCCAGCAAATG  
GGAGTTACTACAGCTAAGATAAATTTGAAGGATAATCCGGAGATAAGGTTTGTCCAGACTA  
AAGCGCCTAAATTTAAACCATACATCCCAAAGAGTGTCCGGCGGTCTATAGGCATGTGACAA  
AGTGTACAAAATATTCCCAGATATGCGAAAGGCCGAGTGTTTTACTCGGCCTCTTAGGTTCT  
ATTATTCTTACCTCTTAGCATTTTTAAACTTCCCTGACTCTTTAGGCACGACTGAAAATAGCA  
TGCTTATATCTGATTGGGCAATTAATAACCTTCTCTAAAGACATTGGCACATGTTTCCATTT

CTTTCATTGTCATTTCTGGCATTCTCCGTCTCTGATACAAATATATAAGCCCTCTATATATTC  
CTTGGTTGCATTAGCTTCTAGCCATGCCCTAGGGTTTTAGCAAACCCCTTCTCTAATATCTC  
TCCTACACCAATCGTCCAAAGCATAGACTCTAGCAGGTCTTTTCTTACTTTATCTTCTGGCTG  
GTAATAAACAGTAAATCCTCTTCCTATGTCCAGTGCCATATTCTTTACTCCTATTTACAGTAT  
TTAATATCTTTTATCAGACTTTACACGTTTTAATGCGGTTTGTCAATAACATAGTATTGTA  
ATAATGAAAATAATTGTA  
AAATCCTACTATGAAATCTTTAAAAGAGCATCGGTTAGAAAAGC  
TCATAACTCAAACAGAATTAGCAA  
AATTAGCTAAAATTAGTAGAGTGT  
CAGTGAGCCAAATT  
GAAAAAGGCCAGCAGAAACCATCCGAGTTAACTATCCGTAAGCTAGCTAAAGCTCTTGATG  
TAAAACCAGCGGATATTGAATTTAATGAAATTTGAATGGGATACTCGAACCAGAACATGG  
GTCGGATATTTATTTATTTTTGGTGGTTTTTTTTGCTTTAGTAATTAATCTATTCGAAACTCCAT  
GGTTTTATATTCCGTTCTTTGGAATTGGTATTGCTCTTATCGCATAACAATCTTATTCGCTATGG  
CCAGCTCCGGGACTATTACTGGCTATGGTGCATGGAACAGACGAATTCCTTTGGCCCATCA  
ATAACGATATTGAAATGAAGCTATTCCAGCCCCGCATTATCTGCCTGGTGGCTGGCAAATC  
TTTTGGATACCGGCTAAGGACCTCTCAAAGCTACCATAATCATCCGCAAGTGGGT  
CAGAGA  
CGCTGAGAAAGTTTTGCGTAAAGACCCAGAATATAAAGACAGAATGCCTAGGTAGGAGGAA  
TATTCTTATAACAAAATGATATAATTTACGTACATGTAGTTCAATTAAGAGTGCTTTAGGG  
AGAGATAGTTACAATGAATGAAAGTAATCAATTAGAACCGATACCAGAAGGCGAAATCCAA  
ATATCTCTATTTAAAAACAAAGAGATCCGAAGAGTATTGCATGACGGCGAATGGTTTTTCTC  
CGTGGTGGATATAATAGAAGCTATAACAGATTCTATCAGGCCACGACAATATTGGACTGACC  
TTAAATCTAAGATAATCAAAGAAGGCGCAAATGAACTGTACGAAAATATCGTACAGTTAAA  
AATGCCTGCTTCAGATGGTAAAGAGCGAGATACGGACGCAGCAGATGCAGAAACAGTCTTC  
CGAATTATACAATCTATCCCTCACCAAAAGCAGAGCCCTTTAAGAGATGGCTAGCTAAAAC  
AGCGTATGATCGTATTGAAGAATTCCAAAATCCTGAGATAGCCATCAAACGAGCTATACTTG  
ATTACCAAATACAAGGCAGAACAGATGAATGGATAAAGGCGCGCATTCGAACTCTGACTAG  
CCGTA  
CTGAATTA  
AACTGACGAATGGCAAAAACGAGGCATAGCAGGTGCGGAGTACGGCATT  
CTCACTAATGTAATATCAA  
AAGAGACTTTTTGATATAGATACAACAGAACACAAGGAAATCA  
AGGGGCTTGCAAAAAGACATAACCTCAGAGATCATATGACTGATATGGA  
ACTTATCTTAACG  
ATGCTTGGGGAAACATCAACAGCCGAACTTGC  
GAGATCGAGGGATGCTAAGGGTTTTCAAG  
AAAATGAGCAGGCAGCTCATGCAGGTGGGAGAATTGCAGGAGACACAAGAAGGAATTT  
CG  
AAAAGCAATTAGGGGAATCGGTCGTCTCTAAAAACAATTTCTTGCCCAAACATCCCGATCAG  
CCAAAATTAGAGGAAGGATAATTATACATACCCAAGGCAAAATATTTTTATAGCTTCAGGTT  
ATCAACCGGACTAAACTTCTTATGCCCTTGAACAGCTACCTCAGAATTCAAACTGGCAGCGT  
ATTTTCTAGTTTGC  
GTCAGAGTGCTATGCCCCATAAGAGATTGAACTTCAA  
ACTCCCCTGCCC  
CATTCCGTAAGCACATAGTAGCGAAGGTGTGCCTGAATGTATGAGGGCTGCACCGGATATTT  
GTAATCCCTGCCCGCTTTCCTAATACGACGATTGTCTGCATGATGCCATTTTTAGTTAAAGGG  
TGGCACTCTTTATCACTATAGCGAGTCTTGTGACGGCTAACCCAAACATCAGGGGTTTTATCT  
CCGGGGAATGACTGGATTTTAAGATACTGATATTCCAGTAATGCCCTCTGAACTTTAGGGCC  
TATGCGTACAATCCTCTCCTTAGCTCCTTTGCCCATAACCTTAACCAATTC  
ACTATCATAATT  
GATATCACTCCACTTCAGCTCTGTGCATTCCCTCAGTCTGAGGCCTGTATCCAGCAACAACA  
GAATAAGTGCTTTATTCCTTTATCTTCGAATGTTTCGCCGGACACTAAAGCCAGCAACCGCT  
GACAATGCTCTTGAGTGAACGGCTGAATAACTTTGCGGGGTA  
CTTTAGGCAGACGTACCTGT  
TTTAACGGATCTACTGTAATTTGCCCATTTGCTT  
GAGCCAGTTAATAAATGGGCGAATTTGC  
TTGAAGTAATCAGTAACGGATTGTGGGCCGTTGGTCAGCTGTA  
ACTGTTGTAGAAATAAACC  
GAGGTGATTGAGGTAATCTGCGCCGGCTTAGTAACGCCATGTT  
CCTGGCAAAAATCAACAA  
ACTTGCCGCACATATATCTGTAATTTGAAATTTGTTGCGGGGCTCAGCTGCCCTACTTTGGCCA  
TAAGAAGATAGGTGGAAAGACACAATCTGAGGTCATCAGGTGTAGTCAA  
AAGGTCACTAGC  
TACGATTGGGTAATCGTAAGAATTTTTGTGAGTTAAACGGTCATTCATGCGCCATTT  
CGAGCT

ACCGACAGCGCTTTTAGCTTTATGGTGGAGCCGGAGGGATTTCGAACCCTCTACCTTTTGACT  
GCCAGTCAAACGTTCTCCCAAGTGAACACTACGGCCCCAGCAACAGATAGATAATCTATCATAA  
ATGGTCACTAAGTGCAACTTTTTTTAGCTTTATAATAAAAATACAGGGCGAGTATTTAA

>Dmc\_IME1-11

ATATGTTGAAACCCGGAATGGTTTTGGGGCAAACCTGTTTGATCAATTTGGGAAATATTCA  
ATGATATTAAGCCGCCAGCTCTTCGAGAAAGTTTTCTTCTAAAAAACAAACCCGGGGGAATA  
TGAAAATATCACATTCCCCGTTGTTATTCGAAACGATTAGAACTCTAGTTTAAAGACCTTCT  
CAAAAAGAGTTTTACCTTTTTTACAACATGGTGGGCCATCTTGGTCTCGAACCAAGGACCTC  
AGTCTTATCAGTTCAGCCTTTAAAACCAGTAAATCCCCTTTTAACCGCCTCCTTTTAGTGTT  
TTAACTTTTTGTTGACCTCAATAATCACAGCAATTGCCTGACATTCTTTGATAGAATGCACAC  
CCTGCCATTCTTAAGAATACATTCACCATTTTGTCTATAATCTTTGCCACCCTTAGTTCATC  
GTCAATAAGGCACAAGACTATGTCCCCTATTTCCGGAACCATATCTCTATCCACAATAACAA  
TATCACCATTCTCAATCTTAGGCTCCATACATTTACCAGAAACAATGTAGGATTCAATATTAT  
GACGAGGCGCTTCACGCACACGTGTCCGATATATAATCTACCGGGGCAAAGCCTGTATTC  
CCCGCATGTGCTCTAAACTCAGAATAAACAGGTATGCTCATTGGAGTAGCCAATCTTAATCG  
TTCAAGTATTTCTCCGGACTTTCAGGACGAGATAATGGAATTGCAGTAGTGGAGTTGCTTA  
TTCTAATGCTTCATATAATTCATCAATATTTATGTTAAAAACATTGGCAAACCTGCATCAATT  
TATCAACACTCGGATTCGGCCTTCTGCCTTGTTCAAGCTGACTTATATTTGTTTCGTGGTACTC  
CTACCTTATCAGCAAGCTGTTGTTGAGACCAACCCCTTGCAACTCGAAGGCTCTTAATTTTAT  
GAGGCAAATTATTCATAAAGCACCTATCTCTTAACAGATACTATTTTATCAGATATTACGCA  
AATTAGAGAGATTAAGCAAGATTGGAAGACTAACAGTTGGTTCTTTTTGTATCCATTGGTG  
CATTTGACTGTCTTTGTCATTGACCCATTTGGTTACAAGTGGTACATTTGCACCTATGAAGAG  
CTTATTAGAATTACTTGTAACCAAGCAAGACGACCTCAAACCTAAGTGACTATGGTTTTGTCA  
TTTTTTTGAACAATCATAGCTCTGTTACTGTATCTCGTCTCTATGGTCTCAAACAAGTACTA  
AACGACGCCAAATCGGTATTACACTCAAAGCCACAATACAGACATTTCCAGAACTGGA  
AGCTGCCGTCATCGATTATCTCAAGAAAAATACTAATCATGAGTAAATCTGATTGTGGTAAC  
GCTACCTGGTTGAAATACGGTCTTGAGTATTATCAAGCAATTGGCCGATTGGGCGGCAGACC  
AAAAATTAATTTATCCGATGAAGTACAAACGCGTACAGCCTCCCTATCTGTATTGGAGAAAG  
GAGAACGGCACGGGGAAGGCCAATCTCTTACGGCACTTAAGAGGCTGTACGCAGAAAGGAA  
GCGAGGCAATGCCTCAACAACAAGTAACCTATCGTATCAAGAACGAACACACCCGGTCAATG  
GTGGGAGGGAAAGGCTGATAGCCCGATAGATGCCATGCGGAAAGCCTCCCTCGAATACCCG  
GTAAAAAGCCCTAAGTCCGGCTGGACAGCTGAAAACCTGCTGGGTACGTCAATGGTGTCTCG  
TGGTTATGGCTCATGGGTAACCCAGACTATGGCCGAAAAACAACAGAGATGGTGAAAGTA  
TGAAATTCTTTCCACGTGCTTACCGCGTAGCTAAAAAAGAACAGGAGAAATAATATGCCTTA  
TAAAAGATATTTCCCGCCAAGATAGTAAGTTTTGACCCTTATTTTGGAAATGGAACGTGATG  
GTCTTAAGTCATTTATTATCGTACAGCATTCTATGGATGCACCGGGCAATCTATTGTTGG  
ATGAATTCAGAAGTCAGAAGTCCCTATGCTGATAACAGTCCATAATCCCCAAACCCGGTCAA  
TCATTTAATGCCTATGTAACCAAGTTGTGCAAAATTCTCCCGCCTGTTACTGGAATACCATC  
CATATCGACACAGACCCGATACTCAGAGCAGAAGAAACGCCAACAGCTATGGCAAGCTACC  
CCAAAAAGGATGACCTTAATGACTAGTGAATGGTTATCTTGGCTGAGATACGTACCGGAGAC  
TGAACAAGGCCGTCCCGCCCCTACCACGGGCTGGGAATGGAGTCCGGGCTGTACCCCGCTCA  
GAGACCCTTCCCCTGGCAAATGGATTGTTTCGGCGCACAGCAGACAGCTTTGATGTGATGTTT  
CGCTCATATTTGACTCCTGAACTACGCAGCGGTGGCCCTGAATACTGGATAGGCAGTTTTAA  
CCCTACTGATACGGGGGAATTAGGTGCCCGTGAAATGGCGCTTAAACTGCGCAAAGAATCTT  
ACAGACAGGAGGCCGAACGTAATGGTCACAGCGATATCGAATAAACCTATTGAATTGTCAC  
AGCGGCGTTATCGCCGAGGGAATTACATGTACTGCCAGTCCGGGCTGATCATAACTATAAA

TGTCCGGTATGCGGCTGCCTGGTACAGCCCGGAGAAGTGGGGTTTATGCGCTACCGGATTAT  
ACGTGACCTGGTAACTGAGCCAATTGGTGACGTAAGTGCATGCGTGCTGTGTGGAGGCAGGG  
AAATGATGGAAATTAATAATTGGTTACCTACTGCTCTCTGCGGATCTACATCAACCCGGAGAT  
GTAGATATTACCTTGACGACTGGAGATGGCACACTTATTGCTGTCGTTAGCTCAAAGACACT  
TATTACCGCTATTGAGGTAAGTGGAGAAAGACAGCGGAATAGCATATCCGGATCAGGACAGGG  
GAGCGTGATCTCCCTCCCACCCCTCTGTCCTGAATTAATAGTAATCGAGGTCCATTATGACA  
ATAGCAACACGTAAATATACGATAGACGATATACTGGCCAAACTCCAGGGCGTCAAAAAGA  
ATGGTTCAGGGTTTATGGCCTGCTGTCTGCCCATGAGGATAAAAACCCTTCTCTCTCCATCA  
GCGAAAAGGACGGCAAGGTGCTCCTGAAATGCTTTGCCGGGTGCAGTTATGAACAAATCAT  
GACCGCGTTAAATATGCCAATAAATGCCGCAGCACAGGATACTACAGCCACCTCTTCAAAA  
AAACCAAAGAGAGCACCAAACGGGAAATAAAGCAGACTTACGACTACACAGACAGAAGC  
GGACAGCTGATATTCCAGGTAGTCAGGTTTGAGCCAAAAGTTTCTCCAGCGACACCCTGG  
CGGCAAGACCGGCTGGGTCTGGAATATGAAGGATATCGAGCCGGTTATCTATCATCTGCCAG  
ACGTGCTGGAAGCGGTAAAAACAGGCCAGACTATTTGGATAACCGAGGGGCGAGAAGGATGC  
TGATAACGCCAGGGCTATGGGCTTGGTGGCCACTACCTCCCCGATGGGGGCGGCAAGTGG  
CGCGATAATTATACTAATGACTTATTGGGAGCCTCGCAAGTAGTAGTTATTGCCGATAAAGA  
CGCTCCGGGCCGTAAACATGCCTCCGATATTGCCATGTCCTGCCGGCGGCAACGGATACCGG  
TCAAGATTATCGAGGTACCCGGCGACGCCAAAGATTTTACCGAGTGGTTGGAAGCCGGCGG  
CCAGACATCCGAATTGGATGATCTGGTAGCTACAGCTAAGAGCTATACGCCATCAAAAAC  
CAGAGCTTATACTTTCTGTCTGATGGCAAGTTTTCTATCGAAGCCGGCCGGATTATTTATCAT  
TCATACAGGGATAATGTCCCCTACGATGCTCCGCTGTGCAATTCGTTGCTGCCGTTAAAGA  
GGAGATCATCAAGACAATGGCATAAACCAGCAAAACTTTCTTCAGGATTGGCGGTACAGAC  
TGTAAGTGGCCGTCGTTTCCAGATATAGAAGTCCCGTCCGAAAACCTTTTCATCCATGTCCTGG  
GCATTATCCCAGTGGGGAATTAAGGCTATGATCGAACCAGCCCTTCAGCTGAACGGCTATT  
ACGCGGGGCAATGCAGTACATGTCGATGGAGGCACCCTGCCGGATTATTTATGAAAATACC  
GGCTGGACTAATATCAACGGCAAGGATGTTTACCTTACTCCCCACGGCGCAATCGGAGCCGA  
TAATGTTGAAGTGGAAATGCCATCCAATATCAGCCATTATGATATACCCTCGCCCCGAACAGA  
ATGACGATGTGAAGTCCTTCATTGAGGCCAGCTTTAATTTCCCTCAAAGTAGCCAAGTTATAT  
ATTACCTTGGCGCTGTTTGGCGCTATGTACATGACGCCTTTGTGACAGCCATTGATACCAAC  
TTCAACCTCTGGCTGATTGCCGGTCTGGCAGCCTTAAACCACGATAGCATCACTGGCACT  
CTGCCACTACGAAAATTTGATTATACTGTGTGCCGGCTGCCTGGCGGGATACTCAGAATA  
CACTGGAACGCATCCTGTTACCTGCAAGGATATGCCGGTGTGGTAGATGACTGGTCACCC  
GGCCAGACCACCGCCTCACAAAAGAATTTGACGCTAAGGCTGACTATGTATGCCGCGGAC  
AGGCTAACAGACAAGGCCGTAAGCGCATGTCTGCCGATACATCTATGAGGCAGGAATATGT  
ACCCAGAGGCTTCCCTGATATCCACCTCGGAAGAACAACCGCCAGGCGAGAGCAATAATGCC  
CGTTTTCTGATCATTGAAATGTCAAAAACAGATATCGAATTCCTTGTCTTACCCTATCACAG  
AAAGAGGACCATCTGTACCGCCGCGCTATGGCTCATTACCTGGCATGGCTGCAAGCGGACTG  
GCCGGCGAAGAAAGTGTATCTGCGCCAGCGCTACCAAGAGGTTTTTTGAACAATTTACTGAGA  
GTCTCCGGGGTAAAATGTGCATCTCCGGCTACCCAGATCCATCGCTCTGTTATATATCGGTC  
TGAAAATGGCTATTCGCTGGGCCGAAGAAAACGGAGCAGCGGATATATTTGATAGGTTTAT  
AGATGAAAGCGGAAACGGGGAGAATGATTCAGTCGGGTCTGCGTATCTCTTAAACAAGCC  
CGCGAAGTATTTATTGAGATGGCCAAGCGACAGGGTGCCCGGATAGATGAGGCTACACCAT  
CGAAAAGTTTGTAAACGCCTTAAATGCAGCCCTTATAGCTGGTACTGCATATCTGGATGTT  
AAAGATGGGGCAAATCCTCGGTCTGCTTACCTGGGCAAACCTCTGATCGGTTGGGATGACCG  
GACTAACGGGCACGTTTCCCTCCATAATGACCTGGCCTACCAAGTAGCCAACCAGCATTACC  
AAAAAATCAATGAGGCTTTTGTAAAAGGATGCTGTATTTATGGATCTGGTGAAGCGTGGT  
TATGTGGATCCGGGTAAAGATGGTAAAACCACTGTCTTTGAGTATATCCCGGTAATAGCAA

GGCATGCCGTGTCCTACATATCAAACGTGAATTCTTGGGGTGGGATGAACAAAAGAGAGGT  
GAGTAAAACAATGAAAAAATGTGTGTCGCCCCAAAAATATCCCATGTATTAAAAAATGGT  
GCAAGAAGTGCAAGAAAACCTGTTTTTAATCGTAAGCCAAAAATATTCTGAACGTGAAATTC  
TTGCACCTTGAGGGTGCAAGAGGGTGCAAGAAGTGCAATACAGGTGCAATACAGGTGCAAG  
AGAAGTGCAAGAAAATATAAAGCTAAATTA AAAATAGGTGCAAGAGAAGTGCAAGAAAAT  
ATTAAGCTAAATTA AAAATACATACTCGTAATTGTCAATATTTCTTGCACCTCAAAAACAAA  
TATATATCACTCAGTTTTAGGGTGACACATAAATCGGTATGTAAGATTGTTAAATCATTCTCA  
AAGGATGTGACATAAATGAAAGTCGCGTTATATGCCAGGGTAAGCACCCGCGATAAAAATC  
AGGATCCGGAAGTCCAACCTGATGGAGCTGCGGAAATATTGCCAGGAAAACGGCATGGAAAT  
AACCAGGGAATATATAGATCATGCCTCGGCTAATGATTTCTGCCGCCGGACGGCATGGAAAC  
AGTTGTTAGCGGATGCGGCTACTCGAAAGTTTAAGGGATTACTGGTGTGGAACTAGACCGG  
GCATTCCGCGACATTACGGTGGCCACCTCGTCCGTTAAAATGCTGCGCAATGCCGGCATAGA  
TTTTATTGTTACCACTGTCCCTGTTCTTTCAAGTCCAAGGTCCAGCTGGAGACCTGATGTTTAA  
CATCTATGCCGCTTTTGCCCAGTTTGAAAAGGACACCATTATTGAAAGAGTTAATGCCGGAC  
TTTCAAGGGCAAAGGCTAAGGGTAAGGCATTTCGGTCGCCCAAGAAAGGCAATAGACTTCAA  
TAAGGTTTTGGAAGCCCACGAGATAGCCTGCTCACGGGTTAACCGGATTACTAAAGAAAATC  
AGGGTTATTCCGAGACGGCGAGGATATTGAGCGAGCAGACCCGGGCTAAGAATTACAGCCGG  
TTGGGTCTATAACCGGATAAAGGCCGGCAATTA AAAATGCTTCAAAAACCCACCCCATTTT  
TGCATAAATTTTAAAGCCAAAAATCTTATCGGATGGGAGGCTTCAAAAACAAATGTTTTTT  
GAAGATGTTGAGCTACTA ACTTGATACCCATTATTCAAAGAAAGTCCAATTTGAAAGGAATG  
GCAATAAATGAGACATCTTAAGGCGGTATGGCAAGGCGGTTTATTTATTGAAGGATTACGT  
CCGAAAAATAGATTACACGAAAGCCCCGGAACACATCATTTAATAGTCACAAAGGCGAGCC  
CCAATTTGATGACCAGAACCTTATCGGTAAAAGAGTAGCAATCCAGTTTGTGGACCGATG  
TATTGGGAAGTTATGGAATAAGCGCAAAAACGGCAAAAATAATGCCCTGCTTAGTGTTTT  
ATTTCAAAGGTAATTGTGCTAAACCGTAAGACCCCAAAATTCACAATTGTA AAAAACACTG  
TCCTATCTGACTAAAAATATACTAAGGGAAAGGAAACGAGATGAAAACCGTATTA ACTAAA  
ATCAAGGGCATCACCCATTATTAATGCACAGATTC CCGATGGCGGGCGCAGACGATACATC  
AAAACGACGTACTGGTGTACCGGATTGGAAGGCAGAGGCAGAACTAGCGTTATACAAAGAT  
GATCATGGTCAAATCTATCAGCCAGCGAGCCATATTGAAGCTTCGCTTAAAGAGGCCAGTAA  
AACACTAAAAATACCAGGCAAACGAGGGGCGACCTATTCAA AACTCATTGGTTCCGCTGTCT  
CTGTTTCCCCTGATGCTATCACTCATTTAATACAGAATTACGAAACAGATAGCCGTCCTGTTG  
TGATACAGAAAGCACGGATAGTACGCTACAGGCCAATATTTAAGGAGTGGGAATTGGAATT  
TGAAATCAATATTGGAGATGAACAAATCCCTATAGAGGTTATCAAACAGGCTCTCGATCATG  
CAGGGCTATATGTAGGTATAGGCGATTTTCGCCCAGGACGTGGAGGAAAATTCGGCAAATTC  
ATGGTTGT CAGATTTGAAGAGAAATAATATAGTCCGTAGCCCTGCGGGTTAGTCAGGTGAGG  
TATGGCTCGGCTTGTTGGGCGTGGTATGGTCAGGCACGGTTAGGCACGGTATGGCAGGGG  
AAGGTTTTTAAAAATTACACGAGAGGAAATACTCAAATCTGATCTTGAATCGGGAGTTAAAG  
AAAAC TTCTTACAGCTGTTGGGAATAAACACAAACAAAGAGTAATTAGGAGAGGGCGAAAT  
GGTACTGAAACGAAAGGGATATACGAATTCAGCCTGGCTGTAGATGCCATGACCTTGGGCC  
AGCTGGGCCAGGAACTGGATAAATGCAGCCAGGAACTGGGTGGCTGTGAATATTGCTCACA  
ACAGGCTATCTGTTTGGATCTATGGCTGCACCTGGCAGATACGGTAAAGGCTGATTGTGCTT  
TAACTGCCCCGGCAGTACACTGTATATGCTCTAGATTTTTAAAAATATTAAGGCCCGACGGCAG  
ATGATCCTGCCGTTGCTTATCGCCTAAGCGCCGAATAAAGACCCAGACAGTACCCGCACTA  
ATAGGGAACAGGAAAAACCATTTCAACAAGTCCGGCCGTACCTTCAAGGAATGAGTAATTCC  
AGAATAGTAAGCGTGGTATCGCATA CGTAATAAACCATAAATACCACCTACCACATTAACA  
ACCGTAACGAACAAATTACCGATGGCACTATCTGAATACTGCATAACCGAAAACCCAAGCA  
GGGCATTGAAAAATGACTGTTCTGGGTCTCCAAGCCAAGTCCCCTCAAATATCAGGCACATT



ACTTGACCTATGATATAGCTATAAACAATCCATACCAGCCATTGCGGTCTCATTAGTAACTC  
GCCAACTTTTCGATTTGTCATTTACCGATAATCACCAGTCAACAGGTACCAATACCCACCA  
TGGCACACCTATAGTCGCGCACCGAAGACTTGCCAAATGAGCCCTGCAACTGCACAGGGT  
AGTAATTTACGCGTTAAACCAAATGATAGGATAGTAATTATGGCCCCGCCGCAAAAGCTAG  
GCTAAGCCAGAGAAATGCAGATGGGAAATTCATCTCTTCCAGAAAATCTGTAATCTGCTGGC  
CACCGGGCAGGTTTTCCGGATGCAGATTGACATACCACCCGGTCGGCATAGTACCCAGATCA  
TCGTCTGTACAATCTCAACCGCATCTTCGTCTATCTCCACAATGAAGGCTGACTGGTTGCAG  
GCAGCATAATTAATCACGGCCACGCTCACATCTGCGTCAGTGGTTGTTATCCGGAAGGAAGG  
AGTAGCATCATTGCTGTTCCCGGACAGGTCCGTGAAAGTAGCGGGCTATTGCCATTCCACG  
AGCCTTTTAATACCCCGCCCCTGTTATTTTGGCATAGTACAGGTAAGGCATCGAGCCGTTA  
GCCCAATAACCAAGTTGTTAGCGTTATCAGTAATAGAGACTGCAAATGCGGCTGAGCCCTC  
TAAGAGACCATCTATATAGATATTCATCGTGCCTGCAGATAAAGATATCTTATATACATGTT  
CTGAAGTGGATATATCCGCCCGCGTAACGATTGTATTATTTGCATTTCCCTGTTATTGATATAT  
TTATGTCTGTTGTAGCAGTGCCACTCCAAGTACCCCTGAATTATTTGTAGTGTAGTATCTGC  
CGTTAGCATAACGATTAGTAGGGTTATACCAGTAAGTTAATTTATTACTGGAGTCCCCGTTT  
GGAGTGACAAGACTATTGCATAACGTGTTCCGGCAGTTAGATTAATTATATTGGAAAAATCA  
AATGTATGATTTACAGCAGAAGTTGAGATAGTTGAAGCTACCACCGAACCGCTAACCAAGG  
CACTTCCTGTTGGCACATCGCCGCTAGTTGCATAGATGGCATAAATAAAATTTCCAGTTGGAT  
TGCCTACTCGTTGTGTTCTAAAGGTAATTTGGTTGACAGCCACATCATTAGAAAATTGAAAG  
GTCTGTGCTATCCAGTTAGCACCGTACAAAGATGTAGCTGAAGCTGTAGTACCATTATATGG  
AGTTTCTGTATAACTTGATGAATTACCTGCCGATACATCTGTTCCAGACGTATAAATCCAGA  
ATGCTCAAATTTAGATAGGTTATAGCCATCATTAAATCTACCACTTAGCTCAATCTCAAAAT  
CATTTCTAGCTCCAAAGACGCAGAATCAACAACGCTCATAACCGGCTGTGTCAGGGAAATAG  
GCCAGTTTACCGCCCATAGCAGTTTACCACCGGTATATAGGTTATAGTTAATAGCCGAATT  
TTGCGCTATCTGGTCAATCCACATAATCCACGGATCAGATCCTTGCCCGGGCATAAAAGGTA  
TGTCATTACCGATGGAATCACGCATGGCGAGGTTATTAAACTCAGAATCTATATAATACCCA  
TCCAGCAGACTATCCGTTGCCAGGTAAAGGGCGCGGCAACATGTGTAGCTGTGTAACCTGGC  
ATTGGTAGCCCGGATATTCGCCTGGTATATAGCATCTGTTATAGTTGAGGCTAAAATCGTGC  
CCGGCCCAATAATGGTAGCCAGAATCAACATAACCCACGGATATTATTAATTTCTTCATGCGT  
GCCTACCCATCAAAACATAACTGGCATAACGCTGCATATATGGTAACTATCATTGCTAGCAGG  
ACACCGTTAAACAATCCCATATCGGTCCCACCGGCAATATATAAGAAGTGGCAATCATTGC  
TCCGTGGTTATTCGCATATTTCACTCTGCCCCATATAAATAATCCTATTACCATCACGATACA  
AATTAGGCTGGTAATCATTTGCCAGCTGGTTACATTATTGAAAATGGATGCCAAGCCTTCCA  
ATATATCCCCGATTATTGTTCCATCCATTGATGAGCCACTCATCCAGCTTTGTCATCACCC  
ACACTCTTCTGGTCATATCCAAACCCTGAGTTTGAGTCGAAAAGATCTTGGGGGCATGGTT  
TGGAGACCCGGAATTGTGCCCTTGCCATAAGCAGAACCGTATTCATTAACACCGTGCCCTG  
GTCAGTCTCCGTCAACAGCTTTTGCACCCAGTTAATCTCCAACGCCCGGCAAACCTTCGATTAT  
CCAACCTCCCATTAAGGTCTGATTTTCTTTTTTTGTTTCCAGTTGGCTGTAGTCAGATGTGGTC  
AGAGTGTAATTGACCTCTGGCGGAATCTCCCAATATTGGGGGTTACCAACCATCTTGAGTAT  
CAGAGCAGTTTCCCACTCCGGAGCATCATCAGCTGCAAAGTAAAAGGCGGAATACCCATA  
TCATAACCGGCGTTGTAGTAAGCGTATGGCTCAATTGCTCCAGCTGAATAATTCCATCTGT  
ATCCATCAGTCTGAAATGAAAGAGTTTATTAGCCGGAGTGGTGGGCTGGCCGGATGAATAG  
GCGATGGTGTATTTAAAGGAGACCAAGCTATCCCCTGTCTCTACAATATTGTGCGCAACCTG  
CACATCATCAATAGTAAACGTGGTGGGCGCAGCCGGGTCAACAGCCAGTACCGCTGCCGGC  
GGTAAGGATGCCAGACATAAGCAGGCAACTATGACGCCTTTATAGATTTTTCGTAAATAATCT  
GCCCATTCATTCACACTCATATATATTGCCGGTCTCTGGGGAGGTCTTCTCCCTTCAGATAG  
CGATAGACCTGCATCCTGCTGATGCCGTATATTCGTGAGATAGCCGTAGCTCCAATACCATG

CGTCTGCATGATATATCGCAGGTTATCAGGGAAGGCATCCTCATTCTTAAGGGCCTCAAGCA  
GCCCGGGTATCTTGGCCGGA ACTATTATCTTCTGTTCTTCCATACTTTTAGTCTACCTGACTG  
CCTGTTTAATACAAGGTCCTTAAATCTCCCTAATTATTTATTAAGATATACCTCAACTGTCA  
CTTAAAGGTGACAGTTCAAGGAAAAATCTTGTCTATCATCATAGAAAACGAGAGGAGGTGA  
TAAAAAATTGGGCAAGGCAATGTCAACCGTCATGTTAATTGTAGGTATCGCAGTTTCGGTTT  
TATTTTTCCCGATGGTTCTCTCTCAATGGATAGTATTCAATTCGCATCCAATACCGGTACCT  
ATGCCGCCGTAACGACCGGTGTCGGCGAAACTACCGCGGACGTTGTTCTTCCACCGCCTTA  
TACAACGATGATAACGGTCATGTTACCAGCATCACGTCTACGGTTGGGACAGACGTTCCCTGT  
GGCCGGCACGATGTTGCTGCTACTAAAACCCTGACTGTAACCGGTTTAAACGGCTTCCGAAT  
CACGGACACTGACCGTCATCTATGACTCCGACAATCTGTCCGACTACACCGGTCTGGGCACT  
ATTGTCAGCCTAAGCCCGCTCATTATCTGGCTGGTAATTCTGGGTGCCTTGGGTATCGGACTT  
TATTCCAACGTAAAGAGCTAATCCGCAAATTCATTCATAGAAAGGAGGTGACAAAAGAAAA  
TGTTTAACTCAAACACGATGAAGGTCGTAGGAGGCATTCTCGGTATAGCTATTTCTCTGCTGT  
TCTTCCCCATCGCCCTGAGCGGTATTGATGCCGTACTGAACAACGCCAATTTGGCCGACTAT  
ACCGGGTTGGAAACCATCGTAAAGATAACCCCCATGATCGTGTGGGTGGGTATCTTCCCTCGG  
TTCCGGCTTAAACCCTGTTTTTTGGGGTCAAAGGAAGCCGCGGGGGCAAAAAATCTAGGTCAC  
GGATGGCCTAAAGGAGATCGTAGCCATGAAGATACTCTGGATGCAATTTGGAAGAGACAAA  
ACCCGGACACAGGACGTACACGTCCTGACCGAGGATGGTCGTATTGTGCAAGTTTCTCCGGA  
TGTGCTTTATGGCTGCGTATCTGTGACGAATGGGGTCAAGCATGGGTGCTAAGGGGTGCAG  
ACCTGTGTCCCTCCCGTGATGGCAAGGGAGACATACTGCTTGTTAATGAGCGGAGCTTAGCA  
CCCATTGCGTTTGACGGACGCCCTGCACGCACGCACGAAGAGGGCGCTGAAACTCAAGGATG  
ATATCGGAGCAGAAGCCTGTGAAAGTGTGCATTTTAAATCGTGACCGCGAAATAAAGAAAGA  
AACCATGGCCAATGTACTCCAGGTACTTATTATCGGTCTGTTCCGGCACGGTCTGTGTAATTGC  
TCTCATAGGGGTATATGCCTCAGGGAATGCAAAATTGCCATGGGTGGGTAGAAAGAAATGA  
CAAAGCATCAACAATTGAAAAGAACCAGGAGTTAATTGCCGATTCAAACCTCCTGAAGA  
AATAATTTTCGTCGCGTATGCAATCAGACCAAAGGCTAAAAGGGAACCCAATGCCCTGGTTT  
ATGATATGCGCCTAGGTTGGGCTCCGGAATATATAGATAATCCTATCGGCCATCGTAAATCA  
TTCCGAAACAAGCGATTATGCCCGATTATCAGGCGCTGGAAACAGTTACCTACTGGCGAATG  
GGAAAGCAA AATTGAACCGGTCCCTGAACCTGAAGATATGGAAGCATCCCTCAAAGTCTTT  
ACAGAATGCTGCATTGGGAACCTTTAGTTAAGTCTGCATTTGGAGGGTTGGGAGATATCTGG  
CAGAAGCTTAAAGTCCGACTGCTGGTTGTATTGGTAGGTATAGGGATTTTTGCCCTGTACCT  
GTTACCCAATCATAAGGAGTAGCTATCATGGCGGGATTTAAACGTAAA AATGGCGGGCCT  
GCAACCGGAGGCACTACGGATACTTTAGGTATCCAAGATACAATCGGTGCGGCCGGTGGCA  
ACGGGTTTAAAGTCAGGATTACTTGATTTTGATGCCCTGGAAAACTACTGGGAAATCCTCAG  
ACCGTAAGTCTGGCAAAGAATTTACTTCACCCGGTGACAATGTCCGCGGTCTGCTGATGAG  
GGCCGACTTCAAGGATGCCAAACAGGTA CTGCGATGATTGAGTACCTCCATCGCTGTA AAG  
AAATTCATTACAAGCGCGGTGAAGACAGATTACTGGATTTTATTGCCGCTCTGCCAGCAATT  
CAGGCCCGCCGGATAAACCTCTTGGCCAAAGTTCTTACCCATGGCGTAATGGAAGCTTCCAG  
CAGGCAGCAGAAAGAACGGAGACCCGAATGATCTGGGGATATATAGGTCATGAAGGTGCCG  
GCAAATCAGCTGCCATGTGCTATTTTGATCTGCTGCATATTGCCAAAGGGGGCGGGCTGTT  
ACCTTCCCGGGCTTCGAAGTGTTTAAACCCAATATCACTCTCGATGATGGTAATCATCCCCG  
CTGGGCAAATCTATAGATATGAAGGAATTTATTTCTCCTTCAGTGATGAGCAAAGCTTCG  
CAACGTGTTTGTCTCTATGGATGAGATCCAGA ACTTTTTCGGGTCTGATAAATACATGACTAT  
GTATAATAGTCTCATTACCAAATACAGCATGCAGCGCAGAAAGCTTAACTTCGGCATCAATT  
ACACCGTCCAGAGTTGGA ACTGGATTGATCCACGATTACGTCAATTAACCCACTTCCTGACT  
GTCTGTAAGGATTTGTACGAACACCTTGGGGCAAAGAAGCCGGTTTGAAGCGCGGCAAC  
TGATAGACCTGGTGACCTATGATTGCAAAGGGTTTATTACCGCGAGGAATGGACTCCTTTG

AAACACTTTAACTTAAATATTTTTGCCGGTTCGCGATTGGTATGACAGTTATTCGACAGTGGAT  
CCGCTGGAAAGTTTTAGAAAAGCTGGTTATTAAGAAAGCCTGAAGATATTTTTGGATATGAGAGA  
GGGAATGCCACGATTTAATCCGCTGGATGATTCCCCTCTTGAGAATGTACCGGATGACGTCC  
GTGAAATAAGCCAGGAAAACAATGCCCGGATATTATCCAAACTTGAAGAGCAGGTCGACCC  
GGCTACTCTTATTCAGGTGAGCAAAGCGCTTAGAAAAGGTTAATGCAAAATGACAACGGACG  
AAGGGTTATTAGCGGCTGCTCAAGCGATTGCAAACGCGTTAGAATCTCTGGGCAATACCCTA  
TCAGCTGCCCTTGACACATCAGTTACCACGCTGATGAGTACGGCTTTATCAACCGGATTGGA  
ATTATTCTTACTCTCGATGATTACTGTATTGGCGCTATGGAAACGCCATATTGTACTGGATAT  
TCTGGCAGGGCTCGGGTGGTTTGGTATCAGTTTTACCCTCTTCAGCAGCGCTTCACTAATAGC  
GGTAATGCCATTTCGCAACCTGTTTGGCTCTTGGGATATTTATGTTTTATCGGATTATTGAAGA  
CACCGGCCGGATAGGCCGATAACGAAGGAGGATGACATGCGTACAAGTAAAAATATGCATC  
AAAAGAAGCCGATAGTATCCCGGCAGTTAAGGTAAGCTGGCACGAAAGAATGCCTAAATTT  
AAAGAGTTTATTCCGAAAGACATCCGAAGGCGTATCGGGATGCGATAGGAGGCCGAATTAT  
GGGTATATTAGGATTTCTTCTCAGGGTAGCTCCGGTAAAATCCTCTCGTATGGGCCACCTA  
GACAACCAAATAACCAGGTGGCCATTAATGCTGCCCTGCAATCCGTTGATAGCTCAGATTCC  
AAGAAAATTACCACAGTTGAGATGAAGGATGGCAAATGGACGATTACCACTGACGGTGCTG  
TTTATAACATCGATACAAACGGCCAAACAGCAGATACCGTGCAGTATATAACCAATTATCTG  
ACTAGCCGCGGGGCATCTGCGGATATTATCAAATCAGTTACAGAGCAGATTCCCATTATCAC  
GACACGGGAATCTGGAAACGTCGTTAAGAAAAAAACCAGTGCAACTATCACAGATCCTAAT  
GATACCACCAAGAAATACACTGCTGAACCTGTAAATGAACCAGCAAATGATTCTACCGGTG  
AAGGTGATACTCAAACCTAACACCGATGTTTCGGTACAGTGGATAATTCTACGGCATGGACG  
TTTACTACCCCTAACGGCACAGTCTACACCGTGCCCATGGCGGGCTTAGCCTGGTCTGACCC  
TGCCAAAATGCATGAACATATAACAACTACCTGAACAGTATCGGCGCGCCCGCAAATGTC  
ATCATGGAAGCTGTTAGCCGTATGCCCGATGTAATGGGCGATACAGGCTTGTGACGCGCCAA  
AACTGACGAATTTGGTAATGAGATAGACAATACTGAAGAGATTA AAAACATGATCGCAGGG  
AGTGACCAATCTTTAGCTGCAACAAACGCTTTAAAGGCATTCTTAGATGCCAAAGGCTTTTC  
AACTTTGTCCTCTGAAGATCAGTTTAAAAAGGCTCTTGAATACGGGATAATACCGGCTGATT  
CAGTGTATGTGCCTCCTGATGCAGGGTACAACGTAGGCCAAAACGCACCGCCCGGAATGCCT  
GATGATGTGGCCGTCAGCTTGGGGCTACTCCCAAATCCGAGCAGATTGAATTCAATCTGCC  
CAACTTTAACTGGGCGTATCTGCCAAAAGCCGATGCAGATAAGTATTTGCTGAGTTACAGG  
CTATTGTTGGCTATGAAGTAACCAATAAAAATCTTAAACAGGCTATGCGCGAGGCACAGGA  
GATAACCACTAAACAAAACCTACAGGCCAGTTCAAAGCTATCTCAGATGCAGTACTGGAA  
AACATTGCGCAACAAAGGCTATCTGGGCAATTCAGATTAGCGGATGTCATAGGACTAAAGC  
CATCTGATATATACAATAGAGATGGTAGCCTGAATTCTGCCAGAATAGCTACTCTTCTCGGT  
GGTAAACCGAGTGATTACAAAACGATTGATGATGTTCTCAGAAAATCAGCTGATCAGGATTC  
TGGTTTAGCCCGCGATGTTGTCAAAGAGATATTCTCCTTTGGGCAAGCTCAAACGAAAACCT  
TCAATAGAGACGATCTCTCCAATGAATATGATAAGGCTGCCTTTCAAGCTTCGGTTAAAGGG  
CTGGAAATGGCCGAGGGCAAAGAGGAATTCATTACCCGAATAATCAAGCAGCAAAAATACCG  
GAGAAATTGTCTCAGAATTTGCTATTTACATGATTCCTATAGTCCGGTACACTATATTCAATCG  
GTAAGGGGGATTACAGGCGGTCAAATAGCCTTGTGAGCTGCTATTGATGTGCTACCTTTATT  
CCGTTTCTCGGTCAAGCCGCTGCAATAGCACGGGCCGGGGCTAGACCCGCTGCAGCATTAGG  
TAAAGCGATATTGGCAGAGGTAAAAGCGCCTCTAACCCAGTATTCTACACCATTAGCAACTA  
CGAAAGTGGCTTTAAGTCCATTTGAAACCCCTGATTGTGCCGCACAAAATACCTCTTAGCTCA  
GCTGAATTAAGCTTCATACAGTCCGCCTGCCTGTTGTGGATGTTGGAGGCAAAAAGCGCT  
TGCTATGGCTCTCCGGGATGAAATAACTAAAAAGGCAATTGCCGGTAAAACCGCTAAATTTA  
CTAAAGACGGGGTAAACAGCGGAAATCCAAACAACCGCCTTGAATAAAAACCATAGCCCCAGC  
TGTAATTAGTGCTACACCAGATGTACGCCATTCTTAGACGGCCTCACTGTAGGTGTAGTTA

AAGATGAGGTAACAGGCGCTGCCTCTGTAGGTAAGGCCGGGATTTATTTGTATCCCCCTCA  
CTGCACACCAAGTTTTCCATGTCTACAGCCGCAGGTATTGCCGGCTCAAAAGGCGCTCTGAA  
GGGCGCAATTATTATAAGAGACCCGGAATTACTATCGAACTTAAGGTCTCCGGGAAACTCT  
GGGCTAGTGCAGCGGAAATAGAGATGCGGCTGCCGGCTGGTACCAGATTGCCAAAGCCGGA  
TCAGTTTTTGTATTCTCGTGATGCTTATGGGGATCTTTACATATATTAGTCATCAACGGCAA  
AGCCTCTCCACTTACACAAGCAGAAATAAACCCAGATGAAGATTATTGGCTCAGCTGACACTC  
TTAAAAACATTTTCAACCCTGGCACAAAAGCTAAAGTGACCAAAAAGGCAGGTAAAACACTAC  
CCCATATGATGAATTGATTGAAGCTAATAAAAAATGTAACCTCAGATTAAAAAACAACCTGGAG  
CAATTTAAAAAGACTGGCAGAATCAGCCCTATGCCGGACGGCGTGTACGCTCTCGGTGATCT  
ACACGGCAAATACAACCAAGTTATGAGCACTCTGACCAGAGAAGGTTTTGTAGATGAAGCG  
GGTAATTGGATAGCCAAAAATACAACCCTGGTACAGGCCGGTGATATTGTGGATCGTGGTTA  
TGGCGGTACTAACTGATTAATAAACTGCAAGCCCTTGATAAACAGGCTAGTAAGATGGGC  
AGCCATATAACTACTCTTATGGGCAACCACGATATAGTATTTGGAGCAGTAGCCAGAGAGCT  
AAAAACCCTTCCTGCGGAGCTTCTTAGCCAGGCTGGTAAAGTACGTTCCGAAGAGCTGCTTA  
GTAAATGTGCCGAGTATTTTCAGGAGTATAGGTAATGAATCCTCAGCCAAGTTAATGGAGACG  
TTCTCTAATGGACGCGGGCACGTTGCCGAAGCCTTGTACGCTGATAGCAAAACACTGGAATG  
GCTTAAAGACCGCCCGGCCATGTACATTAAGATGGAGTCTTATATGTTTCATGCAGACAGCC  
CCAATGTCTATATGCAGATCCTGAAAGAAGCCAAAGCCAAAGGTTTTACAGGGAGCAATCTT  
GAAATCGTCAATAAGTACACTAAAGAGCTTGCTAAAACCACCGAAGGATCCCAGCATCTAT  
ATGATTTGATGGTCAAAAATCGCTATCAGATGACCAGAGAATCAGCAATGGAGATGCTAAA  
AACATTTGATGCTGACAGACTTGTTACGGACATACGCCCCAGGGCGGTAATAAACAGTA  
AATATGAAGGTTTTGGTAACTAACATAGATTCAGGAGTACAGGTAATAATGGTGTATCCCGCATA  
CATCACATAGGCGGACAGGATATCAAGTTACTGCGTAATAATTCACGGGTGATAACACGAA  
CTGAATTGGAAGCCGAATATGCCCGTGCTCTGGAAGAATTCAGACTGCGTGACATGGCGGTT  
AGGCGTGGCTATACCGTACCATATAGCGTTATAGGGTTAGCAAATAGGCAGACTCGGGTATT  
TAGACGCGCAGAACAACCGGCCGAGGATAGCCACCTCGAAGGAAGCACGGGTAGCTCCA  
GAAACAAGACGTCCTGTATCAAATAATCGTAGAACTGCTGCTCTTCCCCGTCACGGCAGGAG  
CGGTATAAGAGTTACTGGTAATCTCCCTCGCTATACAAATACCGAGCAGAGAACGGCTGTAT  
CTACAACCTCGAGTACCCAATGAAGGGCGTGTTAACCTCCCGAAACCAGAGTTAATACTCCT  
GTTAGTAACGTGCCACCCCGCCCGGATAGGTAACCTTACATCCCCAAATCACCTGATAAAAA  
TAGACAGGTAACCACAGAGACAACCCGTCCGAACTCAAAACCGGAGATGTGGCATGGAAA  
CAAGGCGCTTTAGGCAGTGGTGTATGATCAGCGTCCGGTATGGTATATAAAGCGTGCTAACGG  
CAAGGTTGAAATAGTTTTCCAACCGCCTGAAGATGCTCCGAGGCTTGAAGGCACTCCTAAAG  
AAACGTTTTTTACTCGTGGTAAAAACCTCCAACAAATCTCACTCAGGAAATGGGTGTCACT  
ACTGCCCAGATTAACCTTGAGCGCAACCCGAGGATTGATTTTCGTACCCACTAAGGCGCCCAA  
GTTTAAACCCTATATTCCTAAAAATGTTAGGCGCTCAATTGGTATGTGAAATATCTTGACTTT  
TTGCCATTGTAATAATTAATATTGGGTATGGATGAAATTGATATTGTAACAATATGTTTGACC  
ATTATAGTTGCTCTATTAATACTACCTCAGCTTTTGGCCATCATAGTTCGCTTCTTTAAAAAC  
CATAATCAAAAGTATTATTACGTCGCATATTATAATATAGCTGACTCCACGAAAATGATCTT  
ATCCGGTCCTTACGAGAATGTAGTGGAGTCCATTAACCATGTAACCTAATAAGCCTTATATTT  
CAGAATGTATTCAGTACGAATTGAAAACCTACAGACTTGTGTAAGGCCATAGATCAGATTGAG  
GCTGGAGCTAAATACGCGCGTATTTTGCAGATAAACCGCCCTCCCAATATCAAGAATTAGAC  
CAGTGACAAAGTGTACAGATATTCGGAAGATATGCGAAAGGCCGGGATGAACCCGGCCTC  
TTTGTCTTGGAGGTTAAAGATAATGAGGAATTATACTAGTAGTACCTAAGCCTGTTTTCGTC  
TATTATAAGGTGATTGATTGTTAGGCTTTAAAGATATATCCTCCTTACCAGCTTTGTATATA  
CTGCATTGAGAGTTCTCCCCAGCTTACAGCTATTAATCTTGTGGTGTATTTCTCCGACCA  
ATACATTTAATTTACTAACATCTTCTTCAGTCCATCGTTTCCCACTATTCTTTTTCGAATCTC

CACTGCAAGCTCCTATTTTTATTACAAATGGTCCGCCCCCAAATATCTTTACCCCTCAATTT  
AATTATACTCAGTCATGCAAACGTTTTTTAAAGCTTCAAATTATCTACTGGGCTTGCTTGCCG  
GTGGACTCTCATCATATCTTCTGTACCCAAAGTAGAAGTATAACGCCTGGTCATAGCAAGAG  
TAGTATGCCCCAACATGATTTGCAGGGTAAACTCATCCCCACCATTACGTAGATAGTTTATA  
GCTGCCGTATGCCTGAAAGTATGAGGTCTGGCTTAGCATCGATAATCTTAGCCCTTTTACA  
AAGCTTTTTTATGGCTTCCTGAACACCACGACAAGTGAGTGGTCGATGTTCTCAGTCAACC  
ATAAACATTGATAATCATCATCCCTATTAAGCATATACTTTAACAAGGCTTTTTGAGTCTGTT  
TGCCTATTCGAACAATCCGTTCTTTTGACCCTTTCCCAAATACACGAACAGTTTCTTGATTAA  
AATCGATGTCATTAATATTAATGCCGGAATTTCTGCTAATCGTAACCCTGTATCCATAAAC  
AAAAATATTAAGCAGATTGCGTAATCCTAAAAAATTGTTTTGGCATTAAACACCCAATAA  
TTTTTTTATGTCCCAATTGAGAAAGGCTGGATTACTTTCTTATCTAGCCTCGGAGGTTTTAA  
TGTGCGCATTGGATCGTTTGCAATATAAGCCTCTCTCATTAAACCAATGTATAAAGGCTTGGA  
GTGCACGATAATATGCATTCACAGTGTTATTCCCGCACCCCTTTTTCTTGCAAGGATAACAGG  
AATGCCCGTATTAATTGAGGAGATATTTTCAGAGGCTAACTGGAGACTGAAGCGATGACAAA  
ACGACACAAAACAGTTAACACGCCGACGGTAAGTATCAACTGTTTTTGGAGATTTACCTTCA  
ACTTTGCATGAAATTAAGTAAACTCGAGGAGCCTTTTTAATTCATTTGATGCAGGACTGTG  
CTCTATGGCACGAATGAGCTCATCGTAATTAATGTTGTCAGGACTGTGCTCTTTCAATTCATT  
TTCGGCACGGGAAGGCTGTTTTGACTGTTTTAGCTTTATGGTGGGCCATCTTGGTCTCGA  
ACCAAGGACCTCAGTCTTATCAGGACTGCGCTCTAACCAACTGAGCTAATGGCCCATTTGAT  
ACAATATAAACAAACTCAATCTTGAGCTGTGCAATGCATTAGCAAGTGAATTACTATTTGA  
AAAACGTCAT

>Dmc\_IME1-12

TCAATCAAAGCAATCGGACCGGTATTAGACAACAGGCTCATGAAAATTATACCACCGGTAA  
TTGCCCGTAAAAGCATATTTCAATAATATAGAAGCAGGTACAATAGCTAAACCAATGTAAA  
GATTACATCTGGATATGTTGAAACCCGGAATGGTTTTGGGGCAAACCTGTTTGATCAATTT  
GGGAAATATTCAATGATATTAAGCCGCCAGCTCTTCGAGAAAGTTTTCTTCTAAAAAACAA  
ACCGGGGGAATATGAAAATATCACATTCCCCCGTTGTTATTGAAACGATTAGAACTCTAGT  
TTAAAGACCTTCTCAAAAAGAGTTTTACCTTTTTTACAACATGGTGGGCCATCTTGGTCTCGA  
ACCAAGGACCTCAGTCTTATCAGTTCAGCCTTTAAAACCAGTAAATCCCCTTTTAAACCGCT  
CCTTTTAGTGTTTTAACTTTTTGTTGACCTCAATAATCACAGCAATTGCCTGACATTCTTTGAT  
AGAATGCACACCCTGCCATTCTTAAGAATACATTCACCATTTTGTCTATAATCTTTGCCAC  
CCTTAGTTCATCGTCAATAAGGCACAAGACTATGTCCCCTATTTCCGGAACCATATCTCTATC  
CACAATAACAATATCACCATTCTCAATCTTAGGCTCCATACATTTACCAGAAACAATGTAGG  
ATTCAATATTATGACGAGGCGCTTCACGCACACGTGTCCGATATATATAATCTACCGGGGCA  
AAGCCTGTATCCCCGCATGTGCTCTAAACTCAGAATAAACAGGTATGCTCATTGGAGTAGC  
CAATCTTAATCGTTCAAGTATTTCTTCCGGACTTTCAGGACGAGATAATGGAATTGCAGTAG  
TGGAGTTGCTTATTCCTAATGCTTCATATAATTCATCAATATTTATGTTAAAAACATTGGCAA  
ACTGCATCAATTTATCAACACTCGGATTCGGCCTTCTGCCTTGTTCAAGCTGACTTATATTTG  
TTCGTGGTACTCCTACCTTATCAGCAAGCTGTTGTTGAGACCAACCCTTGCAACTCGAAGG  
CTCTTAATTTTATGAGGCAAATTATTCATAAAGCACCTATCTCTAACAGATACTATTTTATC  
AGATATTACGCAAATTAGAGAGATTAAGCAAGATTGGAAGACTAAACAGTTGGTTCTTTTTG  
TATCCATTGGTGCATTTGACTGTCTTTGTCAATTGACCCATTTGGTTACAAGTGGTACATTTGC  
ACCTATGAAGAGCTTATTAGAATTACTTGTAACCAAGCAAGACGACCTCAAACCTAAGTGACT  
ATGGTTTTGTCAATTTTTTTGAACAATCATAGCTCTGTTACTGTATCTCGTCCTCTATGGTCTCA  
ACAAGTACTAAACGACGCCAAATCGGTATTACATTACTCAAAGCCACAATACAGACATTCC  
CAGAAGTGAAGCTGCCGTATCGATTATCTCAAGAAAAATACTAATCATGAGTAAATCTGA

TTGTGGTAACGCTACCTGGTTGAAATACGGTCTTGAGTATTATCAAGCAATTGGCCGATTGG  
GCGGCAGACCAAAAATTAATTATCCGATGAAGTACAAACGCGTACAGCCTCCCTATCTGTA  
TTGGAGAAAGGAGAACGGCACGGGGAAGGCCAATCTCTTACGGCACTTAAGAGGCTGTACG  
CAGAAAGGAAGCGAGGCAATGCCTCAACAACAAGTAACCTATCGTATCAAGAACGAACACA  
CCGGTCAATGGTGGGAGGGAAAGGCTGATAGCCCGATAGATGCCATGCGGAAAGCCTCCCT  
CGAATACCCGGTAAAAAGCCCTAAGTCCGGCTGGACAGCTGAAAAGTGGTGGGTACGTCAA  
TGGTGTCTGCTGGTTATGGCTCATGGGTAACCCAGACTATGGCCGCAAAAACAACAGAGAT  
GGTGAAGTATGAAATCTTTCCACGTGCTTACCGCGTAGCTAAAAAAGAACAGGAGAAAT  
AATATGCCTTATAAAAGATATTTCCCGGCCAAGATAGTAAGTTTTGACCCTTATTTTTGGAATG  
GAACGTGATGGTCTTAAGTCATTTATTATCGTCACAGCATTTTCTATGGATGCACCGGGCAAT  
CTATTGTTGGATGAATTCAGAAGTCAGAAGTCCCTATGCTGATAACAGTCCATAATCCCA  
AACCGGTCAATCATTTAATGCCTATGTAACCAAAGTTGTGCAAAATCTCCCGCCTGTTACTG  
GAATACCATCCATATCGACACAGACCGCATACTCAGAGCAGAAGAAACGCCAACAGCTATG  
GCAAGCTACCCCAAAAAGGATGACCTTAATGACTAGTGGAAATGGTTATCTTGGCTGAGATAC  
GTACCGAGACTGAACAAGGCCGTCCCGCCCCTACCACGGGCTGGGAATGGAGTCCGGGCTG  
TACCCCGCTCAGAGACCTTCCCCTGGCAAATGGATTGTTTCGGCGCACAGCAGACAGCTTTG  
ATGTGATGTTCCGCTCATATTTGACTCCTGAACTACGCAGCGGTGGCCCTGAATACTGGATA  
GGCAGTTTTAACCCCTACTGATACGGGGGAATTAGGTGCCCGTGAAATGGCGCTTAACTGCG  
CAAAGAATCTTACAGACAGGAGGCCGAACGTAATGGTACAGCGATATCGAATAAACCTAT  
TGAATTGTCACAGCGGCGTTATCGCCGAGGGAATTACATGTACTGCCAGTCCGGGCTGATC  
ATAACTATAAATGTCCGGTATGCGGCTGCCTGGTACAGCCCGGAGAAGTGGGGTTTTATGCGC  
TACCGGATTATACGTGACCTGGTAACCTGAGCCAATTGGTGACGTACTGCATGCGTGCTGTGT  
GGAGGCAGGGAAATGATGGAAATTAATAATTGGTTACCTACTGCTCTCTGCGGATCTACATCA  
ACCCGGAGATGTAGATATTACCTTGACGACTGGAGATGGCACACTTATTGCTGTCGTTAGCT  
CAAAGACACTTATTACCGCTATTGAGGTACTGGAGAAGACAGCGGAATAGCATATCCGGAT  
CAGGACAGGGGAGCGTGATCTCCCTCCCACCCCTCTGTCCTGAATTAATAGTAATCGAGGTC  
CATTATGACAATAGCAACACGTAATATAACGATAGACGATATACTGGCCAAACTCCAGGGC  
GTCAAAAAGAATGGTTCAGGGTTTTATGGCCTGCTGTCTGCCCATGAGGATAAAAACCCTTC  
TCTCTCCATCAGCGAAAAGGACGGCAAGGTGCTCCTGAAATGCTTTGCCGGGTGCAGTTATG  
AACAAATCATGACCGCGTTAAATATGCCAATAAATGCCGCAGCACAGGATACTACAGCCAC  
CTCTTCAAAAAAACCAAAAGAGAGCACCAAACGGGAAATAAAGCAGACTTACGACTACACA  
GACAGAAGCGGACAGCTGATATTCCAGGTAGTCAGGTTTGGAGCCAAAAGTTTCTCCAGCG  
ACACCCTGGCGCAAGACCGGCTGGGTCTGGAATATGAAGGATATCGAGCCGGTTATCTATC  
ATCTGCCAGACGTGCTGGAAGCGGTA AAAACAGGCCAGACTATTTGGATAACCGAGGGCGA  
GAAGGATGCTGATAACGCCAGGGCTATGGGCTTGGTGGCCACTACCTCCCCGATGGGGGCC  
GGCAAGTGGCGGATAATTATACTAATGACTTATTGGGAGCCTCGCAAGTAGTAGTTATTGC  
CGATAAAGACGCTCCGGGCGGTAAACATGCCTCCGATATTGCCATGTCCTGCCGGCGGCAAC  
GGATAACCGGTCAAGATTATCGAGGTACCCGGCGACGCCAAAGATTTTACCGAGTGGTTGGA  
AGCCGGCGGCCAGACATCCGAATTGGATGATCTGGTAGCTACAGCTAAGAGCTATACGCCA  
TCAAAAACCCAGAGCTTATACTTTCTGTCTGATGGCAAGTTTTCTATCGAAGCCGGCCGGAT  
TATTTATCATTACATACAGGGATAATGTCCCCTACGATGCTCCGCTGTGCAATTTGCTTGC  
CGTTAAAGAGGAGATCATCAAAGACAATGGCATAAACCGCAAAACTTTCTTCAGGATTGGC  
GGTACAGACTGTACTGGCCGTCCGTTTCCAGATATAGAAGTCCCGTCCGAAAACCTTTTCATC  
CATGTCTTGGGCATTATCCCAGTGGGGAATTAAGGCTATGATCGAACCAGCCCTTCAGCTG  
AACGGCTATTACGCGGGGCAATGCAGTACATGTCGATGGAGGCACCCTGCCGATTATTTAT  
GAAAATACCGGCTGGACTAATATCAACGGCAAGGATGTTTACCTTACTCCCCACGGCGCAAT  
CGGAGCCGATAATGTTGAAGTGGAAATGCCATCCAATATCAGCCATTATGATATACCCTCGC

CCGAACAGAATGACGATGTGAAGTCCTTCATTGAGGCCAGCTTTAATTTCTCAAAGTAGCC  
AAGTTATATATTACCTTGCCGCTGTTTGCGGCTATGTACATGACGCCTTTGTCAGACGCCATT  
GATACCAACTTCAACCTCTGGCTGATTGCCGGTCTGGCAGCCTTAAAACCACGATAGCATC  
ACTGGCACTCTGCCACTACGGAAATTTTGATTATACCTGTGTGCCGGCTGCCTGGCGGGATA  
CTCAGAATACTGGAACGCATCCTGTTACCTGCAAGGATATGCCGGTGCTGGTAGATGAC  
TGGTCACCCGGCCAGACCACCGCCTCACAAAAAGAATTTGACGCTAAGGCTGACTATGTATG  
CCGCGGACAGGCTAACAGACAAGGCCGTAAGCGCATGTCTGCCGATACATCTATGAGGCAG  
GAATATGTACCCAGAGGCTTCTGATATCCACCTCGGAAGAACAACCGCCAGGCGAGAGCA  
ATAATGCCCGTTTTCTGATCATTGAAATGTCAAAAAACAGATATCGAATTCCCTTGTCTTACCC  
TATCACAGAAAGAGGACCATCTGTACCCGCCGCTATGGCTCATTACCTGGCATGGCTGCAA  
GCGGACTGGCCGGCGAAGAAAGTGTATCTGCGCCAGCGCTACCAAGAGGTTTTTGAACAAT  
TTACTGAGAGTCTCCGGGGTGAAAATGTGCATCTCCGGCTACCCAGATCCATCGCTCTGTTA  
TATATCGGTCTGGAAATGGCTATTCGCTGGGCCGAAGAAAACGGAGCAGCGGATATATTTG  
ATAGGTTTATAGATGAAAGCGGAAACGGGGAGAATGATTCAGTCGGGTCTGCGTATCTCTTA  
AAACAAGCCCGCGAAGTATTTATTGAGATGGCCAAGCGACAGGGTGCCCGGATAGATGAGG  
CTACACCATCGAAAAAGTTTTGTAACGCCTTAAATGCAGCCCTTATAGCTGGTACTGCATAT  
CTGGATGTTAAAGATGGGGCAAATCCTCGGTCTGCTTCACCTGGGCAAACCTCTGATCGGTTG  
GGATGACCCGACTAACGGGCACGTTTCCCTCCATAATGACCTGGCCTACCAAGTAGCCAACC  
AGCATTACCAAAAAATCAATGAGGCTTTTGTTAAAAAGGATGCTGTATTTATGGATCTGGTG  
AAGCGTGGTTATGTGGATCCGGGTAAAGATGGTAAAACCACTGTCTTTGAGTATATCCCGGT  
AATAGCAAAGGCATGCCGTGTCCTACATATCAAACGTGAATTCTTGGGGTGGGATGAACAA  
AAGAGAGGTGAGTAAAACAATGAAAAAATGTGTGTCGCCCCAAAAATATCCCATGTATTA  
AAAAATGGTGCAAGAAGTGCAAGAAAATGTTTTTAATCGTAAGCCAAAAATATTCTGAAC  
GTGAAATTTCTTGACCTTGAGGGTGCAAGAGGGTGCAAGAAGTGCAATACAGGTGCAATA  
CAGGTGCAAGAGAAGTGCAAGAAAATATAAAGCTAAATTAAAAAATAGGTGCAAGAGAAGT  
GCAAGAAAATATTAAGCTAAATTA AAAAATACATACTCGTAATTGTCAATATTTCTTGCACC  
TCAAAACAAATATATATCACTCAGTTTTAGGGTGACACATAAATCGGTATGTAAGATTGTTA  
AATCATTCTCAAAGGATGTGACATAAATGAAAGTCGCGTTATATGCCAGGGTAAGCACCCCG  
GATAAAAATCAGGATCCGGAAGTCCAACCTGATGGAGCTGCGGAAATATTGCCAGGAAAACG  
GCATGGAAATAACCAGGGAATATATAGATCATGCCTCGGCTAATGATTTTCGTCCGCCGGACG  
GCATGGAAACAGTTGTTAGCGGATGCGGCTACTCGAAAGTTTAAGGGATTACTGGTGTGGA  
AACTAGACCGGGCATTCCGCGACATTACGGTGGCCACCTCGTCCGTTAAAATGCTGCGCAAT  
GCCGGCATAGATTTTATTGTTACCACTGTCCCTGTTCTTTTCAGTCCAAGGTCCAGCTGGAGAC  
CTGATGTTTTAACATCTATGCCGCTTTTGCCAGTTTGAAAAGGACACCATTATTGAAAGAGTT  
AATGCCGGACTTTCAAGGGCAAAGGCTAAGGGTAAGGCATTCGGTCCGCCAAGAAAGGCAA  
TAGACTTCAATAAGGTTTTTGAAGCCCACGAGATAGCCTGCTCACGGGTTAACCGGATTACT  
AAAGAAAATCAGGGTTATTCCGAGACGGCGAGGATATTGAGCGAGCAGACCCGGGCTAAGAA  
TTACAGCCGGTTGGGTCTATAACCGGATAAAGGCCGGCAATTA AAAATGCTTCAAAAAACCC  
ACCCCATTTTTGCAATAAATTTTAAAGCCAAAAATCTTATCGGATGGGAGGCTTCAAAAAAC  
AAATGTTTTTTGAAGATGTTGAGCTACTAACTTGATACCCATTATTCAAAGAAAGTCCAATTT  
GAAAGGAATGGCAAATAAATGAGACATCTTAAGGCGGTATGGCAAGGCGGTTTATTTATTG  
AAGGATTACGTCCGAAAAATAGATTACACGAAAGCCCCGGAACACATCATTTAATAGTCAC  
AAAGGCGAGCCCCAATTTGATGACCAGAACCTTATCGGTAAAAGAGTAGCAATCCCAGTTT  
GTGGACCGATGTATTGGGAAGTTATGGAATAAGCGCAAAAAACGGCAAAAAATAATGCCCTG  
CTTAGTGGTTTTATTTCAAAGGTAATTGTGCTAAACCGTAAGACCCCAAAATTCACAATTGT  
AAAAAACA CTGTCTATCTGACTAAAAATATACTAAGGGAAAGGAAACGAGATGAAAACCG  
TATTA ACTAAAATCAAGGGCATCACCCATTATTAATGCACAGATTCCCGATGGCGGGCGCA

GACGATACATCAAAACGACGTACTGGTGTACCGGATTGGAAGGCAGAGGCAGAACTAGCGT  
TATACAAAGATGATCATGGTCAAATCTATCAGCCAGCGAGCCATATTGAAGCTTCGCTTAAA  
GAGGCCAGTAAACACTAAAATACCAGGCCAAACGAGGGGCGACCTATTCAAAACTCATTG  
GTTCCGCTGTCTCTGTTTCCCCTGATGCTATCACTCATTTAATACAGAATTACGAAACAGATA  
GCCGTCTGTTGTGATACAGAAAGCACGGATAGTACGCTACAGGCCAATATTTAAGGAGTG  
GGAATTGGAATTTGAAATCAATATTGGAGATGAACAAATCCCTATAGAGGTTATCAAACAG  
GCTCTCGATCATGCAGGGCTATATGTAGGTATAGGCGATTTTCGCCCAGGACGTGGAGGAAA  
ATTCCGGCAAATTCATGGTTGTCAGATTTGAAGAGAAATAATATAGTCCGTAGCCCTGCGGGT  
TAGTCAGGTGAGGTATGGCTCGGCTTGGTTGGGCGTGGTATGGTCAGGCACGGTTAGGCACG  
GTATGGCAGGGGAAGGTTTTTAAAAATTACACGAGAGGAAATACTCAAATCTGATCTTGAAT  
CGGGAGTTAAAGAAAACCTTCTTACAGCTGTTGGGAATAAACACAAACAAAGAGTAATTAGG  
AGAGGGCGAAATGGTACTGAAACGAAAGGGATATACGAATTCAGCCTGGCTGTAGATGCC  
ATGACCTTGGGCCAGCTGGGCCAGGAACTGGATAAATGCAGCCAGGAACTGGGTGGCTGTG  
AATATTGCTCACAACAGGCTATCTGTTTGGATCTATGGCTGCACCTGGCAGATACGGTAAAG  
GCTGATTGTGCTTTAACTGCCCGGCAGTACACTGTATATGCTCTAGATTTTAAAAATATTAAG  
GCCCCGACGGCAGATGATCCTGCCGTTGCTTATCGCCTAAGCGCCGAATAAAGACCCCAGACA  
GTACCCGCACTAATAGGGAACAGGAAAACCATTTACAAAGTCCGGCCGTACCTTCAAGGA  
ATGAGTAATTCCAGAATAGTAAGCGTGGTATCGCATAACGTAATAAACCCATAAATACCACCT  
ACCACATTAACAACCGTAACGAACAAATTACCGATGGCACTATCTGAATACTGCATAACCGA  
AAACCCAAGCAGGGCATTGAAAAATGACTGTTCTGGGTCTCCAAGCCAAGTCCCCTCAAATA  
TCAGGCACATTACTTGACCTATGATATAGCTATAAACAATCCATACCAGCCATTGCGGTCTC  
ATTAGTAACTCGCCAACCTTTCGATTTGTCATTTACCGATAATCACCCTGCAACAGGTACCA  
ATACCCACCATGGCACACCTATAGTCGCGCACCAGAAGACTTGCCAAATGAGCCCTGCAACT  
GCACAGGGTAGTAATTTACGCGTTAAACCAAATGATAGGATAGTAATTATGGCCCCGCCGCC  
AAAAGCTAGGCTAAGCCAGAGAAATGCAGATGGGAAATTCATCTCTTCCAGAAAATCTGTA  
ATCTGCTGGCCACCGGGCAGGTTTTCCGGATGCAGATTGACATAACCACCCGGTCGGCATAGT  
ACCCAGATCATCGTCTGTCAAACTCAACCGCATCTTCGTCATCTCCCACAATGAAGGCTG  
ACTGGTTGCAGGCAGCATAATTAATCACGGCCACGCTCACATCTGCGTCAGTGGTTGTTATC  
CGGAAGGAAGGAGTAGCATCATTGCTGTTCCCGGACAGGTCCGTGAAAGTAGCGGCGTATT  
GCCATTCCCACGAGCCTTTTAATACCCCGCCACTGTTATTTTGGCATAAGTACAGGTAAGGC  
ATCGAGCCGTTAGCCCCAATAACCAAGTTGTTAGCGTTATCAGTAATAGAGACTGCAAATGC  
GGCTGAGCCCTCTAAGAGACCATCTATATAGATATTCATCGTGCCTGCAGATAAAGATATCT  
TATATACATGTTCTGAACTGGATATATCCGCCGCGTAACGATTGTATTATTTGCATTTCTG  
TTATTGATATATTTATGTCTGTTGTAGCAGTGCCACTCCAAGTACAGCCCTGAATTATTTGTAG  
TGTAGTATCTGCCGTTAGCATAACGGATTAGTAGGGTTATACCAGTAAGTTAATTTACTG  
AGTCCCCGTTTGGGAGTGACAAGACTATTGCATAACGTGTTCCGGCAGTTAGATTAATTATA  
TTGGAAAAATCAAATGTATGATTTACAGCAGAAGTTGAGATAGTTGAAGCTACCACCGAAC  
CGCTAACCAAGGCACTTCCCTGTTGGCACATCGCCGCTAGTTGCATAGATGGCATAATTA  
TTCCAGTTGGATTGCCTACTCGTTGTGTTCTAAAGGTAAATTTGGTTGACAGCCACATCATT  
GAAAATTGAAAGGTCTGTGCTATCCAGTTAGCACCGTACAAAGATGTAGCTGAAGCTGTAGT  
ACCATTATATGGAGTTTCTGTATAACTTGATGAATTACCTGCCGATACATCTGTTCCAGACGT  
ATAAATCCAGAATGCTCCAAATTTAGATAGGTTATAGCCATCATTAAATCTACCACTTAGCT  
CAATCTCAAATCATTTCCCTAGCTCCAAAGACGCAGAATCAACAACGCTCATAACCGGCTGTG  
TCAGGGAAATAGGCCAGTTTACCGCCATAGCAGTTTCACCACCGGTATATAGGTTATAGTT  
AATAGCCGAATTTTGCCTATCTGGTCAATCCACATAATCCACGGATCAGATCCTTGCCCCG  
GCATAAAAGGTATGTCATTACCGATGGAATCACGCATGGCGAGGTTATTAACCTCAGAATCT  
ATATAATACCCATCCAGCAGACTATCCGTTGCCAGGTAAGGGGCGCGCAACATGTGTAGC



TGTGTAACCTGGCATTGGTAGCCCGGATATTCGCCTGGTATATAGCATCTGTTATAGTTGAGG  
CTAAAATCGTGCCCGGCCAATAATGGTAGCCAGAATCAACATACCCACGGATATTATTAAT  
TTCTTCATGCGTGCCTACCCATCAAACATAACTGGCATAACGCTGCATATATGGTAACTATC  
ATTGCTAGCAGGACACCGTTAAACAATCCCATATCGGTCCCACCGGCCAATATATAAGAACT  
GGCAATCATTGCTCCGTGGTTATTCGCATATTTACTCTGCCCCATATAAAATAATCCTATTAC  
CATCACGATACAAATTAGGCTGGTAATCATTGCCAGCTGGTTACATTATTGAAAATGGATG  
CCAAGCCTTCCAATATATCCCCGATTATTGTTCCATCCCATTGATGAGCCCCTCATCCAGCT  
TTGTCATCACCCACACTCTTCTGGTCATATCCAAACCCTGAGTTTGGAGTCGAAAAGATCTTGG  
GGCACATGGTTTTGGAGACCCGGAATTGTGCCCTTGCCATAAGCAGAACCGTATTCATTAAC  
ACCGTGCCCTGGTCAGTCTCCGTCAACAGCTTTTGCACCCAGTTAATCTCCAACGCCCGGCA  
AACTTCGATTATCCAACCTCCCATTAAGGTCTGATTTTCTTTTTTGTTCAGTTGGCTGTAG  
TCAGATGTGGTCAGAGTGTAATTGACCTCTGGCGGAATCTCCAATATTGGGGGTTACCAAC  
CATCTTGAGTATCAGAGCAGTTTCCCACTCCGGAGCATCATCAGCTGCAAAGTAAAAGGCGG  
AATACCCCATATCATAACCGGCGTTGTAGTAAGCGTATGGCTCAATTGCTCCCAGCTGAATA  
ATTCCATCTGTATCCATCAGTCTGAAATGAAAGAGTTTATTAGCCGGAGTGGTGGGCTGGCC  
GGATGAATAGGCGATGGTGTATTTAAAGGAGACCAAGCTATCCCCTGTCTCTACAATATTGT  
GCGCAACCTGCACATCATCAATAGTAAACGTGGTGGGCGCAGCCGGGTCAACAGCCAGTAC  
CGCTGCCGGCGGTAAGGATGCCAGACATAAGCAGGCAACTATGACGCCTTTATAGATTTTCG  
TAAATAATCTGCCATTTCATTCACACTCATATATATTGCCGGTTCTCTGGGGAGGTCTTCTCC  
CTTCAGATAGCGATAGACCTGCATCCTGCTGATGCCGTATATTCGTGAGATAGCCGTAGCTC  
CAATACCATGCGTCTGCATGATATATCGCAGGTTATCAGGGAAGGCATCCTCATTCTTAAGG  
GCCTCAAGCAGCCCGGTATCTTGCCCGGAATATTATCTTCTGTTCTTCCATACTTTTAGTC  
TACCTGACTGCCTGTTAATAACAAGGTCCTTAAATCTCCCTAATTATTTATTAAGATATACC  
TCAACTGTCACTTAAAGGTGACAGTTCAAGGAAAAATCTTGTCTATCATCATAGAAAACGAG  
AGGAGGTGATAAAAAATTGGGCAAGGCAATGTCAACCGTCATGTTAATTGTAGGTATCGCA  
GTTTCGGTTTTATTTTTCCCGATGGTTCTCTCCTCAATGGATAGTATTCAATTCGCATCCAATA  
CCGGTACCTATGCCGCCGTAACGACCCGGTGTCCGGCAAACCTACCGCGGACGTTGTTCTTTCC  
ACCGCCTTATACAACGATGATAACGGTCATGTTACCAGCATCACGTCTACGGTTGGGACAGA  
CGTTCCTGTGGCCGGCACGTATGTTGCTGCTACTAAAACCCTGACTGTAACCGGTTTAAACGG  
CTTCCGAATCACGGACACTGACCGTCATCTATGACTCCGACAATCTGTCCGACTACACCGGT  
CTGGGCACTATTGTCAGCCTAAGCCCGCTCATTATCTGGCTGGTAATTCTGGGTGCCCTGGGT  
ATCGGACTTTATTCCAACGTAAAGAGCTAATCCGCAAATTCATTATAGAAAAGGAGGTGACA  
AAAGAAAATGTTTAACTCAAACACGATGAAGGTCGTAGGAGGCATTCTCGGTATAGCTATTT  
CTCTGCTGTTCTTCCCATCGCCCTGAGCGGTATTGATGCCGTACTGAACAACGCCAATTTGG  
CCGACTATACCGGGTTGGAAACCATCGTAAAGATAACCCCATGATCGTGTGGGTGGGTATC  
TTCCTCGGTTCCGGCTTAACCCTGTTTTTTGGGGTCAAAGGAAGCCGCGGGGGCAAATAATC  
TAGGTCACGGATGGCCTAAAGGAGATCGTAGCCATGAAGATACTCTGGATGCAATTTGGAA  
GAGACAAAACCCGGACACAGGACGTACACGTCCTGACCGAGGATGGTCGTATTGTCGAAGT  
TTCTCCGGATGTGCTTTATGGCTGCGTATCTGTGACGAATGGGGTCAAGCATGGGTGCTAA  
GGGGTGCAGACCTGTGTCCCTCCCGTATGGCAAGGGAGACATACTGCTTGTTAATGAGCGG  
AGCTTAGCACCCATTGCGTTTGACGGACGCCCTGCACGCACGCACGAAGAGGCGCTGAAAC  
TCAAGGATGATATCGGAGCAGAAGCCTGTGAAAGTGTGCATTTTAATCGTGACCGCGAAAT  
AAAGAAAGAAACCATGGCCAATGTACTCCAGGTAATTATTATCGGTCTGTTCCGGCACGGTCT  
GTGTAATTGCTCTCATAGGGGTATATGCCTCAGGGAATGCAAATTTGCCATGGGTGGGTTAG  
AAGAAATGACAAAAGCATCAACAATTGAAAAGAACCAGGAGTTAATTGCCGGATTCAAAAC  
TCCTGAAGAAATAATTTCTGTCGCGTATGCAATCAGACCAAAGGCTAAAAGGGAACCCAAT  
GCCCTGGTTTATGATATGCGCCTAGGTTGGGCTCCGGAATATATAGATAATCCTATCGGCCA

TCGTAAATCATTCCGAAACAAGCGATTATGCCCGATTATCAGGCGCTGGAAACAGTTACCTA  
CTGGCGAATGGGAAAGCAAAATTGAACCGGTCCCTGAACCTGAAGATATGGAAGCATCCCC  
TCAAAGTCTTTACAGAATGCTGCATTGGGAACCTTTAGTTAAGTCTGCATTTGGAGGGTTGG  
GAGATATCTGGCAGAAGCTTAAGGTCGGACTGCTGGTTGTATTGGTAGGTATAGGGATTTTT  
GCCCTGTACCTGTTACCCAATCATAAGGAGTAGCTATCATGGCGGGATTTAAACGTAAAAA  
TGGCGGGCCTGCAACCGGAGGCACTACGGATACTTTAGGTATCCAAGATACAATCGGTGCG  
GCCGGTGGCAACGGGTTTAAGTCAGGATTACTTGATTTTTGATGCCCTGGAAAACTACTGGG  
AAATCCTCAGACCGTAAGTCTGGCAAAGAATTTACTTCACCCGGTGACAATGTCCGCGGTC  
TGCTGATGAGGGCCGACTTCAAGGATGCCAAACAGGTA CTGCGATGATTGAGTACCTCCAT  
CGCTGTAAAGAAATTCATTACAAGCGCGGTGAAGACAGATTACTGGATTTTATTGCCGCTCT  
GCCAGCAATTCAGGCCCGCCGATAAACCTCTTGGCCAAAGTTCTTACCCATGGCGTAATGG  
AAGCTTCAGCAGGCAGCAGAAAGAACGGAGACCCGAATGATCTGGGGATATATAGGTCAT  
GAAGGTGCCGGCAAATCAGCTGCCATGTGCTATTTTGATCTGCTGCATATTGCCAAAGGGGG  
CGGGCTGTTACCTTCCC GGCTTCGAAGTGTTAAACCCCAATATCACTCTCGATGATGGTAA  
TCATCCCCGTCTGGGCAAATCTATAGATATGAAGGAATTTATTTTCTCCTTCAGTGATGAGCA  
AAAGCTTCGCAACGTGTTTGTCTCTATGGATGAGATCCAGA ACTTTTTTCGGGTCTGATAAAT  
ACATGACTATGTATAATAGTCTCATTACCAAATACAGCATGCAGCGCAGAAAGCTTAACTTC  
GGCATCAATTACACCGTCCAGAGTTGGA ACTGGATTGATCCACGATTACGTCAATTAACCCA  
CTTCTGACTGTCTGTAAGGATTTGTCACGAACACCTTGGGGCAAAGAAGCCGGTTTGAAGC  
GCGGCCAACTGATAGACCTGGTGACCTATGATTGCAAAGGGTTTATTACCGGCGAGGAATG  
GACTCCTTTGAAACACTTTAACTTAAATATTTTGCCGGTTCGCGATTGGTATGACAGTTATTC  
GACAGTGGATCCGCTGGAAAGTTTTAGAAA ACTGGTTATTA AAAAGCCTGAAGATATTTTGG  
ATATGAGAGAGGGAATGCCACGATTTAATCCGCTGGATGATTCCCCTCTTGAGAATGTACCG  
GATGACGTCCGTGAAATAAGCCAGGAAAACAATGCCCGGATATTATCCAAACTTGAAGAGC  
AGGTGACCCGGCTACTCTTATTCAGGTGAGCAAAGCGCTTAGAAAAGGTTAATGCAA AATG  
ACAACGGACGAAGGGTTATTAGCGGCTGCTCAAGCGATTGCAAACGCGTTAGAATCTCTGG  
GCAATACCCTATCAGCTGCCCTTGACACATCAGTTACCACGCTGATGAGTACGGCTTTATCA  
ACCGGATTGGAATTATTCTTACTCTCGATGATTACTGTATTGGCGCTATGGAAACGCCATATT  
GTACTGGATATTCTGGCAGGGCTCGGGTGGTTTGGTATCAGTTTTACCTCTTCAGCAGCGCT  
TACTAATAGCGGTAATGCCATTCGCAACCTGTTTGGCTCTTGGGATATTTATGTTTTATCGG  
ATTATTGAAGACACCGGCCGGATAGGCCGATAACGAAGGAGGATGACATGCGTACAAGTAA  
AAATATGCATCAAAGAAGCCGATAGTATCCCGGCAGTTAAGGTAAGCTGGCACGAAAGAA  
TGCCTAAATTTAAAGAGTTTATTCCGAAAGACATCCGAAGGCGTATCGGGATGCGATAGGA  
GGCCGAATTATGGGTATATTAGGATTTCTTCTCAGGGTAGCTCCGGTAAAATCCTCTCGTAT  
GGGCCACCTAGACAACCAAATAACCAGGTGGCCATTAATGCTGCCCTGCAATCCGTTGATAG  
CTCAGATTCGAAGAAAATTACCACAGTTGAGATGAAGGATGGCAAATGGACGATTACCACT  
GACGGTGCTGTTTATAACATCGATACAAACGGCCAAACAGCAGATACCGTGCAGTATATAA  
CCAATTATCTGACTAGCCGCGGGGCATCTGCGGATATTATCAAATCAGTTACAGAGCAGATT  
CCCATTATCACGACACGGGAATCTGGAAACGTCGTTAAGAAAAAAACCAGTGCAACTATCA  
CAGATCCTAATGATACCACCAAGAAATACACTGCTGAACCTGTAATGAACCAGCAAATGA  
TTCTACCGGTGAAGGTGATACTCAA ACTAACACCGATGTTTTCGGTACAGTGGATAATTCTA  
CGGCATGGACGTTTACTACCCCTAACGGCACAGTCTACACCGTGCCCATGGCGGGCTTAGCC  
TGGTCTGACCCTGCCAAAATGCATGAACATATAACAAACTACCTGAACAGTATCGGCGCGCC  
CGCAAATGTCATCATGGAAGCTGTTAGCCGTATGCCCGATGTAATGGGCGATACAGGCTTGT  
CAGCGCCCAA ACTGACGAATTTGGTAATGAGATAGACAATACTGAAGAGATTA AAAACAT  
GATCGCAGGGAGTGACCAATCTTTAGCTGCAACAAACGCTTTAAAGGCATTCTTAGATGCCA  
AAGGCTTTTCAACTTTGTCTCTGAAGATCAGTTTAAAAGGCTCTTGAATACGGGATAATA

CCGGCTGATTCAGTGTATGTGCCTCCTGATGCAGGGTACAACGTAGGCCAAAACGCACCGCC  
CGGAATGCCTGATGATGTGGCCGTCAGCTTGGGGCTACTCCCCAAATCCGAGCAGATTGAAT  
TCAATCTGCCCAACTTTAACTGGGCGTATCTGCCAAAAGCCGATGCAGATAAGTATTTGCT  
GAGTTACAGGCTATTGTTGGCTATGAAGTAACCAATAAAAATCTTAAACAGGCTATGCGCGA  
GGCACAGGAGATAAACACTAAACAAAACCTACAGGCCAGTTCAAAAGCTATCTCAGATGCA  
GTACTGGAAAACATTGCGCAACAAAGGCTATCTGGGCAATTCAGATTAGCGGATGTCATAG  
GACTAAAGCCATCTGATATATAACAATAGAGATGGTAGCCTGAATTCTGCCAGAATAGCTACT  
CTTCTCGGTGGTAAACCGAGTGATTACAAAACGATTGATGATGTTCTCAGAAAATCAGCTGA  
TCAGGATTCTGGTTTAGCCCCGCGATGTTGTCAAAGAGATATTCTCCTTTGGGCAAGCTCAA  
CGAAAACCTTTCAATAGAGACGATCTCTCCAATGAATATGATAAGGCTGCCTTTCAAGCTTCG  
GTTAAAGGGCTGGAAATGGCCGAGGGCAAAGAGGAATTCATTACCCGAATAATCAAGCAGC  
AAAATACCGGAGAAATTGTCTCAGAATTTGCTATTTACATGATTCCTATAGTCGGTACACTA  
TATTCAATCGGTAAGGGGGATTACAGGCGGTCAAATAGCCTTGTCAGCTGCTATTGATGTCGC  
TACCTTTATTCCGTTTCTCGGTCAAGCCGCTGCAATAGCACGGGCCGGGGCTAGACCCGCTG  
CAGCATTAGGTAAGCGATATTGGCAGAGGTAAGAGCGCCTCTAACCAGTATTCTACACCCA  
TTAGCAACTACGAAAGTGGCTTTAAGTCCATTTGAAACCCTGATTGTGCCGCACAAAATACC  
TCTTAGCTCAGCTGAATTAAGCTTCCATACAGTCCGCCTGCCTGTTGTGGATGTTGGAGGCA  
AAAAGCGCTTGCTATGGCTCTCCGGGATGAAATAACTAAAAAGGCAATTGCCGGTAAAAC  
CGCTAAATTTACTAAAGACGGGGTAACAGCGGAAATCCAAACAACCGCCTTGAATAAAACC  
ATAGCCCCAGCTGTAATTAGTGCTACACCAGATGTACGCCATTCTTAGACGGCCTCACTGT  
AGGTGTAGTTAAAGATGAGGTAACAGGCGCTGCCTCTGTAGGTAAGGCGGGGATTTATTTG  
TATCCCCCTCACTGCACACCAAGTTTTCCATGTCTACAGCCGCAGGTATTGCCGGCTCAAAA  
GGCGCTCTGAAGGGCGCAATTATTATAAGAGACCCGGAATTACTATCGAACTTAAGGTCTC  
CGGGAAACTCTGGGCTAGTGCAGCGGAAATAGAGATGCGGGCTGCCGGCTGGTACCAGATTG  
CCAAAGCCGGATCAGTTTTTTGTATTCTCGTGATGCTTATGGGGATCTCTTACATATATTAGTC  
ATCAACGGCAAAGCCTCTCCACTTACACAAGCAGAAATAAACAGATGAAGATTATTGGCT  
CAGCTGACACTCTTAAAAACATTTTCAACCCTGGCACAAAAGCTAAAGTGACCAAAAAGGC  
AGGTAAAACTACCCCATATGATGAATTGATTGAAGCTAATAAAAATGTAAGTCAAGATTA  
AAACAAGTGGAGCAATTTAAAAAGACTGGCAGAATCAGCCCTATGCCGGACGGCGTGTACG  
CTCTCGGTGATCTACACGGCAAATACAACCAAGTTATGAGCACTCTGACCAGAGAAGGTTTT  
GTAGATGAAGCGGGTAATTGGATAGCCAAAATACAACCCTGGTACAGGCCGGTGATATTG  
TGGATCGTGGTTATGGCGGTAATAACTGATTAATAAACTGCAAGCCCTTGATAAACAGGCT  
AGTAAGATGGGCAGCCATATAACTACTCTTATGGGCAACCACGATATAGTATTTGGAGCAGT  
AGCCAGAGAGCTAAAAACCCTTCTGCGGAGCTTCTTAGCCAGGCTGGTAAAGTACGTTCCG  
AAGAGCTGCTTAGTAAATGTGCCGAGTATTTACAGGAGTATAGGTAATGAATCCTCAGCCAAG  
TTAATGGAGACGTTCTCTAATGGACGCGGGCACGTTGCCGAAGCCTTGTGAGCTGATAGCAA  
AACACTGGAATGGCTTAAAGACCGCCCGCCATGTACATTAAGATGGAGTCTTATATGTTT  
ATGCAGACAGCCCCAATGTCTATATGCAGATCCTGAAAGAAGCCAAAGCCAAAGGTTTTAC  
AGGGAGCAATCTTGAAATCGTCAATAAGTACACTAAAGAGCTTGCTAAAACCACCGAAGGA  
TCCCAGCATCTATATGATTTGATGGTCAAAAATCGCTATCAGATGACCAGAGAATCAGCAAT  
GGAGATGCTAAAAACATTTGATGCTGACAGACTTGTTACGGACATACGCCCCAGGGCGGT  
AAAATAACCAGTAAATATGAAGGTTTGGTAACATAGATTCCGAGTCAGGTAATAATG  
GTGTATCCCGCATAACATCACATAGGCGGACAGGATATCAAGTTACTGCGTAATAATTCACGG  
GTGATAACACGAACTGAATTGGAAGCCGAATATGCCCGTGCTCTGGAAGAATTCAGACTGC  
GTGACATGGCGGTTAGGCGTGGCTATACCGTACCATATAGCGTTATAGGGTTAGCAAATAGG  
CAGACTCGGGTATTTAGACGCGCAGAACAACCGGCCGAGGATAGCCACCTCGAAGGAAG  
CACGGGTAGCTCCAGAAACAAGACGTCCTGTATCAAATAATCGTAGAACTGCTGCTCTTCCC

CGTCACGGCAGGAGCGGTATAAGAGTTACTGGTAATCTCCCTCGCTATACAAATACCGAGCA  
GAGAACGGCTGTATCTACAACCTCGAGTACCCAATGAAGGGCGTGTTAACCCCTCCCGAAACC  
AGAGTTAATACTCCTGTTAGTAACGTGCCACCCCGCCCGGATAGGTACTTACATCCCCAA  
ATCACCTGATAAAAATAGACAGGTAACCACAGAGACAACCCGTCCGAAACTCAAAACCGGA  
GATGTGGCATGGAAACAAGGCGCTTTAGGCAGTGGTGATGATCAGCGTCCGGTATGGTATAT  
AAAGCGTGCTAACGGCAAGGTTGAAATAGTTTTCCAACCGCCTGAAGATGCTCCGAGGCTTG  
AAGGCACTCCTAAAGAAACGTTTTTTACTCGTGGTAAAAAACCTCCAACAAATCTCACTCAG  
GAAATGGGTGTCACTACTGCCAGATTAACCTTGAGCGCAACCCGAGGATTGATTTTGTACC  
CACTAAGGCGCCCAAGTTTAAACCCCTATATTCCTAAAAATGTTAGGCGCTCAATTGGTATGT  
GAAATATCTTGACTTTTTGCCATTGTAATAATTAATATTGGGTATGGATGAAATTGATATTGT  
ACAATATGTTTGACCATTATAGTTGCTCTATTAATACTACCTCAGCTTTTTGGCCATCATAGT  
TCGCTTCTTTAAAAACCATAATCAAAAGTATTATTACGTGCGCATATTATAATATAGCTGACTC  
CAGAAAATGATCTTATCCGGTCCTTACGAGAATGTAGTGGAGTCCATTAACCATGTAACATA  
ATAAGCCTTATATTTTCAAGATGTATTTCAGTACGAATTGAAAACCTACAGACTTGTGTAAGGCC  
ATAGATCAGATTGAGGCTGGAGCTAAATACGCGCGTATTTTGCAGATAAACCGCCCTCCCAA  
TATCAAGAATTAGACCAGTGACAAAGTGTACAGATATTCGGAAGATATGCGAAAGGCCGG  
GATGAACCCGGCCTCTTTGTTCTTGGAGGTTAAAGATAATGAGGAATTATACTAGTAGTACC  
TAAGCCTGTTTTCGTCTATTATAAGGTGATTGATTGTTAGGCTTTAAAGATATATCCTCCTTA  
CCAGCTTTGTCAATACTGCATTGAGAGTTCTCCCGAGCTTCACAGCTATTAATCTTGTGGT  
GTATTTCTCCGACCAATACATTTAATTTACTAACATCTTCTTCAGTCCATCGTTTTCCACTAT  
TCTTTTTCGAATCTTCCACTGCAAGCTCCTATTTTTATTACAAATGGTCCGCCCCCAAATATCT  
TTACCCCTCAATTTAATTATACTCAGTCATGCAAACGTTTTTTAAAGCTTCAAATTATCTAC  
TGGGCTTGCTTGCCGGTGGACTCTCATCATATCTTCTGTACCCAAAGTAGAAGTATAACGCCT  
GGTCATAGCAAGAGTAGTATGCCCAACATGATTTGCAGGGTAAACTCATCCCCACCATTAC  
GTAGATAGTTTATAGCTGCCGTATGCCTGAAAGTATGAGGTCCTGGCTTAGCATCGATAATC  
TTAGCCCTTTTACAAAGCTTTTTTATGGCTTCTGAACACCACGACAAGTGAGTGGTCGATGT  
TCCTCAGTCAACCATAAACATTGATAATCATCATCCCTATTAAGCATATACTTTAACAAGGCT  
TTTTGAGTCTGTTTGCCATTTGGAACAATCCGTTCTTTTGACCCTTTCCCAAATACACGAACA  
GTTTCTTGATTAATAATCGATGTCATTAATTAATGCCGAAATTTCTGCTAATCGTAACCCT  
GTATCCATAAAACAAAAATATTAAGCAGGATTGCGTAATCCTAAAAAACTTGTTTTGGCATT  
AACACCCAATAATTTTTTTATGTCCCAATTGAGAAAGGCTGGATTACTTTCTTATCTAGCCT  
CGGAGGTTTTAATGTGCGCATTGGATCGTTTGCAATATAAGCCTCTCTCATTAAACCAATGTAT  
AAAGGCTTGGAGTGCACGATAATATGCATTCACAGTGTTATTCCCGCACCCCTTTTTCTTGCAA  
GGATAACAGGAATGCCCGTATTAATTGAGGAGATATTTAGAGGCTAACTGGAGACTGAAG  
CGATGACAAAACGACACAAAACAGTTAACACGCCGACGGTAAGTATCAACTGTTTTTGGAG  
ATTTACCTTCAACTTTGCATGAAATTAAGTAAAACCTCGAGGAGCCTTTTTAATTCATTTGATG  
CAGGACTGTGCTCTATGGCACGAATGAGCTCATCGTAATTAATGTTGTCAGGACTGTGCTCT  
TTCAATTCATTTTCGGCACGGGGAAGGCTGTTTTTACTGTTTTTATGGTGGGCCAT  
CTTGGTCTCGAACCAAGGACCTCAGTCTTATCAGGACTGCGCTCTAACC

>Dmc\_IME1-13

AAGCGGACCGGTATTAGACAACAGGCTCATGAAAATTATACCACCGGCAATTGCCCGTAAA  
AGCATATTTCAATAATATAGAAGCAGGTACAATAGCTAAACCAATGTAAAGATTACATCTGG  
ATATGTTGAAACCCGGAATGGTTTTGGGGCAAACCTGTTTGATCAATTTGGGAAATATTCA  
ATGATATTAAGCCGCCAGCTCTTCGAGAAAGTTTTCTTCTAAAAAACAAACCGGGGAATA  
TGAAAATATCACATTCCTCCCGTTGTTATTCGAAACGATTAGAACTCTAGTTTAAAGACCTTCT  
CAAAAAGAGTTTTACCTTTTGTACAACATGGTGGGCCATCTTGGTCTCGAACCAAGGACCTC

AGTCTTATCAGTTCAGCCTTTAAAACCAGTAAATCCTCTTTTAGCCGCCTCCTTTAGTGTTT  
CAATCTTTTGGTTACTTCAATTATGACAGCAATAGCCTGGCATTCTTTAACAGAGTGAGTGCC  
TTGCCATTTTTTCAGGATACATTCGCCGTTTTGCTCTATAATTTTTGCCACTCGGAGTTCGTGCG  
TCGATAAGACACAGTACAATGTCCCCACCTCAGGAACCATATCCCTGTCTACAACAACAAT  
ATCACCATTCTCAATCTTGGGCTCCATACACTTACCCTTAACGATATATGATTCTATATTATG  
CCGTGGTGCCTCACGTACACGTGTCCGGTAAATGTATTCAACTGGAGCAAACCCACTATCCC  
CTGCGTGCGCCCTAAATTCAGTATAAACAGGTATGCTCATGGGAGTAGCCAGCCGTAACCGT  
TCTAGTATCTCTTCAGGACTCTCTGGGCGTGATAATGGTATTGTGGAAGTTGGATTGTGAATA  
CCCATAGATCTATATAAGTCATCCACATTTATGTTAAATGCCGACGCAAGTTTTACTAACTTA  
TCCACCCCTGGAGTAATTCTCCTACTAGATTCTAAGGCTTGATAAAGTGACCTTGAAAGACCT  
GCTTTATTTGCAAGCTGCTGTTGAGACCAATTCTTCGCATCTCTTAGACTACGTATTTTATCC  
GATAGTTGATTGATTTTCATTCATGTTTCATTTGCCACTATTTTAGCAGGATTTAAGCAAAAATA  
AGAGCCTCAGCGAGATATTTTATAATAAAGTGGCTCTCTTTATTATCCATTGGCTACTATATT  
ATCTATTTGCAGTTGTGTTTTTTGTAGCCCTCGGCTACTATTTTATCCATGAACACATTACTCG  
AGCAATTGATTACTGAACAACTACTCGTCAAATGAGCGATTATCAATTTGTAAATTTTTTA  
AATTTCCATAGCAACGCTCATGTATCTCGACAACCTTTGGCATCAAACGCGGAATAAGCACAT  
ACCTTTAGGTTTTTAAAATCCTAAAAGCGACAGTGCAAACATTTCCGGAGCTTGAGACTGCCG  
CCATCGATTATCTCAAGAAAAATACTAATCATGAGTAAATCTGATTGTGGTAACGCTACCTT  
GTTGAAATACGGTCTTGAGTATTATCAAGCAATTGGCCGATTGGGCGGCAGACCAAAAATTA  
AGCTATCCGATGAAATACAAACGCGTACAGCCTCCTTATCTGTATTGGTGAAAGGAGAACGG  
CACGGGAAGGCCAATCTCTTATGGCACTTAAGAGGCTGTACGCAGAAAGGGGAATGAGGC  
AATGCCTCAACAACAAGTGACTTATCGTATCAAGAATGAACGCACCGGTCAATGGTGGGAG  
GGAAAAGCTGATAGCCCGATAGATGCCATGCGGAAAGCCTCCCTCGAATACCCGGTAAAAA  
GCCCTAAGTCCGGCTGGACAGCTGAAAACCTGCTGGGTACGTCAATGGTGTCTGCCGGTTAT  
GGCTCATGGGTAACCCAGACTATGGCCGCAAAAACAACAGAGATGGTGAAAGTATGAAATT  
CTTTCCACGTGCTTACCGCGTAGCTAAAAAAGAACAGGAGAAATAATATGCCTTATAAAAAG  
ATATTTCCCGGCCAAGATAGTAAGTTTTGACCCTTATTTTGGAAATGGAACGTGATGGTCTTAA  
GTCATTTATTACCGTCACAGCATTTTCTATGGATGCACCGGGCAATCTATTGTTGGATGAATT  
TCAGAAGTCAGAAGCTCCTATACTGATAACAATCCATAATCCCCAAACCTGTCAATCATTTA  
ATGCCTACGCAACCAAAAGTTGTGCAAAATTCTCCCGCCGTTACTGGAATACCATCCATATC  
GACACAGACCGCATAACGAAGAGCAGAAGAAGCGCAAACAGCTATGGCAGGCTACCCCAAA  
AAGGATGACCTTAATGACTAGTGAATGGTTATCTTGGCTGAAATACGTACCGAAACCCAGC  
AAGGCCGTCCCGCCCCTACCACTGGCTGGGAATGGAGTCCGGGCTGTACCCCGCTCAGAGAC  
CCTTCCCCTGGCAAATGGATTGTTTCGGCGCACAGCAGACAGCTTTGATGTGATTTTCCGATCC  
TATTTGTTCCCTGAGCTGTGCAGCGGTGGCCCTGAATACCTAATAGGTAGTTTTAACCCTACT  
GATGCAGGCGAATTAGGGGCCCGCGAAATGGCGCTCAAATTGCGCAGCGAATCTTACAGAC  
AGGAGGCCGAACGAAGTGGTATTAGCTACTCAATCTAAACCGATTGAATTGTCACCCCGCCG  
CTACCGCAAAGGTAATTATATGTTCTGCCCGGTAAAAGCCGACCGCAATTACAAGTGCCCGG  
AGTGTGGTTGTCTGGTACAGCCAGGGGAAGTTGGATTTACCCGCTTTAAGATTATTCATGAT  
CTGGTAACTGAACCAATCGGGGATGTACTGCATGCGTGCTGTGTAGAGGCAAGGGAATGAT  
AAGAATTAATAATTGGTCACTAACGCTCTCTGCGGACCTATTTCAATCCGGAGATGTAATTA  
TTACCTTGAGGACTGAAGATGGCACACCTGTTGCTGCCGCAACTCAAAGACACTTATTGCC  
GCTATTGAGGCACTGGAGAAGACAGCGGAATAACATCCAGGACGGACAGGGGAGTGTGATC  
TCCCTCCACTTCCCTGTCCGTCCTTAAAAACACAAAGGAGTGACATATGGTCGTATCAACA  
CTGAGTAAGAGACCAATTCTGCAAACCTACCCTTGTACCCACTGCGGCCGGGAGACCGAATG  
GGATTTTGACCTGGGCTCCAATCCACTATGCGCATACTGTTGGGACAACAGTATAGAAATAA  
CCGTCAAGGTTGAGCTGGCTGATAAGAAGCGTGCCTACTACCAGGAGCATAAGGTTGAGCT

GGCTGATAAGATGCGTGCCTACTACCATGAGCATAAAGGTTGAGCTGGCTGATAAGATGCGTG  
CCTACCGCCAGGAGCATAAAGGTTGAGCTGGCTGATAAGATGCGTGCCTACCGCCAGGAGCA  
TAAGGTTGAGCTGGCTGATAAGAAGCGTGCCTACCGCCAGGAGCATAAAGGTTGAGCTGGCT  
GATAAGAAGCGTGCCTACTACCAGGAGCATAAAGGTTGAGCTGGCTGATAAGAAGCGTGCCT  
ACCGCCAGGAGCATAAAGGTTGAGCTGGCTGATAAGATGCGTGCCCGTTCGGCTATTTCCATT  
TAACTAGTCTGAAATGAGGTCCAATATGGTAATAGCAATACGAAAATATACGATAGACGAT  
ATCCTTGCCCGACTTCAGGGCGTCAAAAAGAATGGATCCGGCTACATGGCCTGCTGTCCTGC  
CCATGAGGATAAAAACCCGTCTCTATCAATCAGTGAAAAGGACGGCAAGGTGTTCTGAAG  
TGCTTTGCCGAATGTAGTTATGAGCAGATCATGACCGCGTTGAATATGCCACCAGACGCACA  
ACTCCGCGAAGTTAAACCCCTGTTAATAAATCCAAGAAAATTCACCGCTGGGCAAGATA  
GTTATTGCGTACCCGTATGAGCAAAAAGACGGGTCTTTATACTACGAGCATGTACGCTACCA  
GCCAAAACATTAGATTTAGACACCCGGATACAAGGGGTGGATATATCAACAATATGGAT  
GGGATAGACCATATTTTGTACCGGCTACCTAATCTGGTACACGGGATAGCCGAAGGTAATC  
AGTCTATATTGCTGAAGGTGAACGGGACGTTGATAACATACGCGGCTTAAACTTGGTCGCAA  
CGTGTAATGATTGTGGCGCCGGTAAATGGGAAGACAGATACTCTGACGAATTAAGGTTGC  
GCCCAAGCAATCATTATCTCTGACAAAGACGAACCCGGCCGTAAACATGCGTCCGAAGTTG  
CCCTATCCGTTCCATAACAGAGGCGTACCGGTTAAGATTATCGAAATGCCAGGGGAATTCCAG  
AAGACTGAGGACGGCTATACAGGGGTTAAGGACTTTTCCGACTGGCTGAATGCCGGCGGAA  
CTGCCTCCCAGCTGGAAAACTGGTAGCCGAGGCACCGGTCTATGTACCGCCGCTAATACAG  
GACTCCCTCCGTGAGATATCCGGAGAGCGGTATTGTGTGGAAAACGGCAGGGTCTGTCTAAT  
AAAAGGCGGCAGAGATGGATCGCTGACTCTCCCCCTGTGTAATTTTACAGCCAGGGTAACAG  
AAGAAATAACCAGAGACAACGGGGTAGAAGTATCCAAGTTTTTCCGGATACTTGGCCATGA  
TTACGCCGTAATAATCTGCCCGCTATTGAGGTGTCTGCATCATCTTTCCCTGGATTAAACTG  
GGTAGTATCAGAATGGGGAATGCGGGCCATCATAGGCGCCGGTCAGAGCGTTAAAGACTGC  
CTCAGAGAGGCTATGCAGCTGCTCTCCAAAACGCCCAATCCCGTCATATATATACCCATAC  
CGGCTGGCGTCATATTAACGGGCAAGATATATTCTCTCCCAGGGCGGGGCTATAGGCTGTG  
ATGGAGTGGATGTAGACCTGGAACCCAGCTGCAGAGGTATTTCTGGGCACACCGGACCC  
GGAGAAATTAAGGGAATCTGTCCGGGCCAGCCTGAACTTTCTCTATATCGCTGACTTGTCGG  
TTACCCTGCCGCTTTGGACAACGATGTATCTGTCTCCGCTGGCCGAAGCCCTGAACCGGCTT  
TTACCTTATGGCTGGTGGCTGTGTCCGGCAGTTATAAATCAACTCTGTCTGCGTTGGCACTCT  
GCCATTTCCGAGATTTTGGACAATAACCATCTGCCGGCGTCTTGGCGGGATAACCGGTAACCG  
CTGAAAAACTGTTGTTACCCGCTAAGGACCTGCCGCTGGTTATAGATGACTGGGCACCTGG  
TCAGGATAACAATAAGAAACGCGAGTTGGAAGCTAAAGCTGAGCATATCATTTCGTGCCAG  
GGCAATCACCAGGGGCGCGCCGGATGCGCTCAGACACAACCTCACGCCTGAGTTATTATCC  
CCGCGGTATGTTGGTTACATCAGGTGAGCATAACCCCTCCGGCCATTCCCATACCGCCCGTA  
TTATCAGCGTGCGGTTGGAAAAGGAAATGGTTGACCTCGGCTTAATGACCGAGGCTCAGACT  
AAGGACCGCCACCTATACCGCCAGGCCATGGCCAATATATCGCCTGGTTACAACCGAACTG  
GCTTGAGCGCAAATGTGAACTCCGGCAGAAATTTACCCAGCTGCGGGCTGAGATTACCAATG  
AATTAAGCGACTGCAAAATACATTCCCCTGCCGGATGTAGTAGCCATCCTTCTGATTGCG  
CTGTCTACCGCTTTAGAGTTTGCTAAATCTACTGGAGAGCTTAAGGCAGACGAATACGATTT  
ATTCATGAATGAGGGCCGCGTTATTTTCATGGACATGGCCAAGGAGCAGGGCGAAATGGTT  
GAGGAACAACGCCAGGTCAGAGAGCTATTGAGGCTATCCAGGCATCGCTGCGTATCGGTA  
CGGCAGTATTACGCAATAAAAATGATGCCGCGCTGACTGAGTTGCCATCAGGTAAGACCGCT  
ATCGGCTGGCGGGATTATATGAACGGGCATACCCTGCTGGATCCGGCCGCGCACTTACCAGGT  
AATAGTCCAGCACTGCGCAAAGTCCAACAATCCATATACCATCAACGAGCTGGAAACATGG  
CGGGATTTAAACCGCATGGGATTTACTGAGGCCTCCAATGACGGCAGGCCTACGGTCATGGC  
CAGAGTAACGGCTATCCCGAAGTCATTCCGGGTAGTCAAGGTTAAAATGAGGCTATCGGA

TTGGCTGAAACAACATCCCTGCCGCTGGAAGGCATGGAAAATGTGTAAATATTTTTTACCGG  
CGGGGGGTATATCAAAATTTTGGAAACATGGAAACAAACCCTTTTTCCAATCGTGGCTTAC  
GTTGTTTTCCAAGACCTGGAAACAAGCCCTAAATTTTGGAAACATTGGAAACAGACATAATGT  
TAGCTGGAAACATTTTGGTAACACGATTGATATACGAACAAATAAACTACTTAACAATAATA  
AAATGGAAACATTTTGGAAACAACGTAACCTTAGCTTTGAGATTCTTTATTGTTTCCATGTTT  
CCAAAAGAATAGGAGTTAGCTGACATGAAGATTGTTAAATCATTCTCAAAGGGCTCGGATA  
AATGAAAGTCGCGTTATATGCCAGGGTAAGCACTCGGGATAAAAATCAGGATCCGGAAGTC  
CAACTGATGGAGCTGCGGAAATATTGCCAGGAAAACGGCATGGAAATAACCAGGGAATATA  
TAGATCATGCCTCGGCCAATGATTTTCGTCCGCAGGACGGCATGGAAACAGTTGTTAGTGGAT  
GCATCTGCCCCGAAAGTTTCGGGGGTTACTGGTGTGGAACTTGACCGGGCATTCCGCGACAT  
TACGGTGGCCACCTCGTCCGTTAAAATGCTGCGCAATGCCGGCATAGATTTTATTGTTACCA  
CTGTCCCTGTCTTTAGTCCAAGGTCCAGCTGGAGACCTGATGTTTAAACATCTATGCCGCTT  
TTGCCAGTTTGAAGGACACCATTATTGAAAGAGTTAATGCCGGACTTTCAAGGGCAAAG  
GCTAAGGGTAAGGCATTCGGTCCGCCAAGAAAGGCAATAGACTTCAATAAGGTTTTGGAAG  
CCCACGAGATAGCCTGCTCACGGGTTAACCGGATTACTAAAGAAAATCAGGGTTATTCCGAG  
ACGGCGAGGATATTGAGCGAGCAGACCGGGCTAAGAATTACAGCCGGTTGGGTCTATAACC  
GGATAAAGGCCGGCAATTAATAATGCTTCAAAAAACCCACCCCATTTTTGCATAAATTTTAA  
AGCCAAAATCTTATCGGATGGGAGGCTTCAAAAAACAAATGATTTTTGAAGGCATAGTTG  
AGGTGACGGCATGACAGCCATATAACCAGGATAACCATATAAAACGGGTAGCGTATGCTGAC  
CCCCATATATTGGGCAAGCTAAAAACACTATAAATGTGATGAGATAAATCATGCTGAAC  
CATTGATAAGTTACAACAATATGATGGGTGGGCATTATCGGCTAGCTCGTCTAGCTTAAGTA  
TCATTCTTAAGCTTTGCCAGACAACGTCAGAGTAGGGGCTTGGGTAAAGCCGTTTTGTTTAT  
TCAAACGGGGGGTAAATCCAGCGTATGCGTGGGAGCCCGTAATATATGTGCCAGCACGAAA  
GCCCATATCGGCTAACACTACCAGAGATTGGGTAGCCTGCAATATGACTATTAACGTGGGT  
TAGCAGGAGCTAAACCTAAATTATTCTGTAATTGGTTATTTGATATTTTAGGTTAATGCCTG  
ATGACGAATTTAATGACCTATTTCCGGGAACCTGGAGCAGTAACAAGGGCGTGGGAATATTG  
GCATATGAACCAACAAATTCAGCGTAACCAACAACAGGCAATAGGAGTATAGATAGTGGAT  
AAACGCATAGCTATATATAACCTCTATCCTCAATACCGCAATTATGCATTGGATAAGGTTAG  
AACTTTTTACACCTCGCAGGGTGCAGGACTAGAAAATTATTTCCCCTGCGCCAATATGATG  
AGATATGGGCATCATCAATATTCAATTACAACCATGCCCTTATACCGCCTGAATGTCATATA  
GGCGGCTCAGGAGTTGACCTGCGGACTGAATTGCCCGCAGAGATAGAAGCGGTAAATCCTC  
GGCTGAATTATGGTTTTACTACTCGTGGCTGTATCCGCAATGCGAATTCTGTATTGTACCTG  
AAAAAGAGGGACGAATTCGGCATGATAGGGATTTGCTTGACCTCTGGGATGGCACAAGCAG  
GGATATCGTCCTGTATGACAATAATCCTCGCTATGCCGGAGCATTGAGCAGGTCTGTTT  
GGACGCGAGACAAAATGGTATTCGTCTAGATTTTAAATCAGGGTTTAGACCACCGTTTACTAA  
CTCAGGAACACGTAGACTTGCTAAAAACCATTAGACATCACGAACTCAGGTTTGCTTTTAC  
AGTGTGACGCAATTCTCGTCCGTAGAACGCACTATAGATTTGTTACAGAGGAATGGGATAAA  
CCGCTGTCTGTGGTATGTGCTATGCGGATTTGATACATCGCTTGAAGAGGATTTGATACGCCT  
TAATTATCTCCGTGAACGCAATCAAAATGCCTATGTAATGAGATACAACCTCAGGGCGAACGG  
ATATACGGCTAACTGCCCTTGCTCGCTGGGCTAACCCAGCATCATATATTTTATGGGATGACTT  
GGGTTCAATTCTTAGATGTGCCGGAACATCAGCACTATAAACGACACATACAGGCAATAGG  
AGCGTAAGAGATGAAAAAATTACTTAACTATACTACTGAAGTCTCAGCCACTCGTACGATTG  
GCGAAATACAACCTTGTCTAGCAGAGCATAAAGCTTCGGCTATCCTGACTGAATATGACGAT  
AATGGCAGAGTGCAGGCTATCTCATTCAAAATCAGGACTCCAGCTGGTGAATAACCATTCTG  
ACTGCCTGTTAATGTTGATGCGGTGTATAACCTGCTGCTACAACAACGAGTACGGTCCGTAA  
CTGGAACAACGCGCAGGAATTGGTCTACAAGCAGGCAGAACGAGTGGCGTGGCGTATATT  
AAAAGATTGGGTAGAGGCTCAAATGGCAATTATAGACACGCAGATGGTTACGATTACTCAG

GTATTTATGCCATATATGCTGGTAGATGGGCATTTAACACTGTATGACCACATGGCTAAAAA  
CAATTCCTGCTGCCTGCAGGACATTAAGGAGAAGGCAAATGAGAGATATTAATTCAGAG  
GGAAACGGGTTAGCGATGGCGAATGGGTTTATGGATATTATGTCTATGCAGACGTAACCAA  
GAAACATCAAATTGCTGTAGAAGTCTTAGACGGGTGCAAACACTACTACGTGTATCACGAG  
GTTATCCCTGAAACAGTGGGGCAATATATAGGTCTCAAGGACAAGAACAACAAGGAGATAT  
ACGAAGGGGATATTTGTGGAGATACTCATGGTCAAATATTGCAGATAGTATGGAACGAGTG  
CCATCAATGGGGTTGTACTGTGATAAGCTCTTCAGCTATAAAAGGGCTTACATTCCCCTCT  
GGCAATGGGATATCGCAAGAAACCCATATTACCCAACCTCTAGAAGTCATAGGCAACATCTA  
CGACAACCCCGAATTACTTGAGGAGGGCAAACAGTGACTACAGTTAAAGAGCGACCAATTC  
TATTCAGTGGTGATATGGTGCGAGCTATTCTGGAAGGTAAAAAGACGCAGACAAGACGGGT  
AAACGGGTTATCAATGGTAAGTGGGTCTATGGGTATCTCTTAGACTTAGGCATCAATTTTGC  
GGACCTCAGTACTGGGTAGTTATGGAATAAACACAAAAAAGAGTCCGGAATAACACTCTCG  
TTGGTGGTTTATTTCAAAGGTAAATGTGCTAGGGGAAAGGAAGGGAAATGAAAACCGTAT  
TAACTAAAATCAAGGGCATCACCCATTATTAATGCACAGATTCCCGATGGCGGGCGCAGAC  
GATACATCAAACGACGTAAGTGGTGTACCGGATTGGAAGGCAGAGGCAGAACTAGCGTTAT  
ACAAAGATGATCATGGTCAAATCTATCAGCCAGCGAGCCATATTGAAGCTGCGCTTAAAGA  
GGCCAGTAAAACACTAAAAATACCAGGTAAACGAGGGGCGACCTATTCAAAACCTCATTGGT  
TCCGCTGTCTCTGTTTCCCCTGATGCTATCACTCATTGGTCCAGGATTATGAGATAGATAGT  
CGCCCTGTTGTGGTACAGAAGGCAAGGATAGTGCCTTACAGACCAGTATTTAAGGATTGGG  
AATTAGAGTTTGACATCAATATAGGGGATGATCAAATCCCTATAGAGGTTATCAAACAGGCT  
CTCGATCATGCAGGGCTATATGTAGGTATAGGCGATTTTCGCCCCAGGACGTGGAGGGAAATT  
CGGCAAATTCATGGTTGTCAGATTTGAAGAGAAATAATATAGTCCGTAGCCCTGCGGGTTAG  
TCAGGTGAGGTATGGCTCGGCTTGGTTGGGCGTGGTATGGTCAGGTACGGTTAGGCACGGTA  
TGGCAGGGTAAGGTTTTTAAAAATTACACGAGAGGAAATACTCAAATCTGATCTTGAATCGG  
GAGTTAAAGAAAACCTTCTTACAGCTGTTGGGAATAAACACAAACAAAGAGTAATTAGGAGA  
GGGCGAAATGGTACTGAAACGAAAGGGATATACGAATTCAGCCTGGCTGTAGATGCCATG  
ACCTTGGGCCAGCTGGGCCAGGAACTGGATAAATGCAGCCAAGAAGTGGGGGGCTGTGAAT  
ATTGCTCACAACAGGCTATCTGTTTGGATCTATGGCTGCACCTGGCAGATACGGTAAAGGAT  
GATTGTGCGTTAACTGCCCGGCAGTACACTGTATATGCTCTAGATTTTAAAAATATTAAGGC  
CCGACGGCAGATGATCCTGCCGTTGCTTATCGCCTAAGCGCCGAATAAAGACCCAGACAGT  
ACCCGCACTAATAGGGAACAGGAAAAACCATTTAACAAGTCCGGCTGTACCTTCAAGGAAT  
GAGTAATTCCAGAATAGTAAGCGTGGTATCGCATAACGTAATAAACCCATAAATACCACCTAC  
CACATTAACAACCGTAACGAACAAATTACCGATGGCACTATCTGAATACTGCATAACCGAA  
AACCCCAACAGGGCGTTGAAAAAGGACTGTTCCGGGTCTCCAATCCAAGTACCCTCAAATAT  
CAGGCACATTACTTGGCCAATGATGTAACATAAACAATCCATACCAGCCATTGCGGTCTCA  
TTAGTAACTCGCTAACTTTCTATTTGTCAATTCGCCGATAATCACCCTGCAATAGGTACCAA  
CACCCACCATGGCACACCTATAGTTGCACACCAGAAGACTTGCCATATGAGCCCTGCAACTG  
CACAGGGTAGCAATTTCTCGTTAAACCAAATGACAGGATAGTAATTATGGCCCCGCCGCCA  
AAAGCTAGGCTAAGCCAAAGAAACGCAGATGGGAAATTCATATCTTCCAGAAAATCTGTAA  
TCTGCTGGCCGCCAGGCAGGTTTTCCGGATGCAGATTGCCATACCAACCGGACGGCATGGTA  
CCCAGGTATCGTCTGTCAATCTCAACCGCATCTTCGTATCTCCACGATGAAAGCTGA  
CTGGTTGCAGGCAGCATAATTAATCACGGCCACGCTCACATCTGCGTCAGTGGTTGTTGCC  
GGAATGAGGGCGTGGCATCATTACTATTCCCAGGATAGATCCGTAATGTAGTGGCGTATTGC  
CATTCCCACGAGCCTTTTAATAACCCACCAACCGTTATTTTTGCATAGTATAAATACGGCATT  
GATCCGTTCTGGGTAAAGTACCAGTCATTGACATTATCAATTACAGAGCCAGCATAAGCGGC  
AGAATCAGCCAATATATTGTGACGTATAAAGAAATTGTTCCCCCGGATAAAACAGTTTTTA  
TTATATGGTTCGCTAGATATTATTCCGGTAGCTGTTAGTGTACAGCAGGAGTATAGCCACCT



ACAACAAAATAATAATCATAACTGCCTGCTGACCAAGTTATGCCGCTGTCCGATGACGAACA  
CTTAGTTCCACTGGCATAAGCATTGGAATCTTTTGACCACACCTTAATATAATTAGAAGCGTC  
TCCAGTCGGGCAAGAGACAGCCAAGGCATAAGAAGTTCCTGAACTTAATTTAGCTGACTGG  
CTTAAGTAAAATGTTTGGGCGCCGGCTGTCCACTGATAGTGGATGCGCTAATTGATCCAGT  
TGCAAGCGCCGTACCAGTTGGA ACTCCACCAGATACGGCGTAGATATATACATTA AAAATTC  
CGCTTGGAGCTAATATTTCTGACACCATAATGTAATACTATTGACATATATATCGCTAATAG  
GGATAAAAGTTTGTCCATACCAACTTGTTCGTAAACATTGGATACGGTGCCTGAATAATAT  
GTAGCCTGGCTAATAGATGCTGCTGATCCGATTAGAGCAACAACATCCCCTGCATTATTCGG  
GTAGCAAATATACGCCCCGCTTTGTGCGATTATTAATTTACTTGCCCCGCTGGATGTATTAAT  
ATACCCACTTAACTCAATCTCAA AATTATTGCCCAACTCCAACGACGCAGAATCAACA ACTC  
TCATACCGGCTGTGTCAGGGAAATAGGCCAGTTTGCCCCCATGGCAGTGTGCGCCGCGGTA  
TAGAGGTTGTAGTTAATAGCGGAGTTCTGGTTGATCTGCTCAACCCACATCATCCAGGGGTT  
GCTGCCATAACCGGGCATAAAGGCAATATCTACCCCGCCGGAGTCTCTTAATGCCAGGTTAG  
AAAAGTCTGGATCTATATAATAACCATCCAGCAGGCTCTGGGAAGACCAGATAAATGGCAC  
AGATACCTGCTGGGCGGTATAGCTGGCATTGTGGCCCGGATATCCGCCATATAGATAGCAT  
CCGTAATAGTTGAGGCCATGATCGGTACAGCCCCTGTAATGGCCACCAGGATAAAAAGAAT  
AACAGATACCAATAATTTCTTCATGCGTGCCTTCCCATAAAGACATAACCGGTGTAAAACGC  
GTAAATAATGGTAATAATCGCTAGGATAACCCCGTTAAATAATCCCATGGCCGTACCACCGG  
CCAAGATATAGGAACCGGCTATCATAGCCGATTGATTATCCGAGTATTTAAATTGTGACCAG  
CCAAATAAACTACTACTAGAATCAGACACAGCAA ACTGGTAAGTATCTGCCAGCTGACAG  
CATTATTAATATATCAGCCAAACCTGTTAGGGCATCACCCACCACAGTGCCATTCCATTGTT  
CTGCCCAGGTAGTTAGCATATCAGTGCCCCATGTCCTTCTAGTAAGGTCTAAACCTTGTGCTT  
GGGTGGAATATATCTTGGGGCACATAGTCTGTAATCCGGGGATGGTTCCATTACCATAAGCA  
GCTCCGTAGTCATTA AATACCGTCCCCTGGTTGGTTTCGGTCAGTAATTTAACTGACCAGTTG  
ATCTCCAGAGTCCGGCAGACTTCTATAATCCAATTACCCATCAGGGATTGATTTTCTTTCTTA  
GTAGATAATTGGCTGTAATCGGAGCCAGTCATAGTGTAGTTAACCTCCGGAGGCGTCTCCCA  
ATACTGAGGGTTCCCCACCATTTTGAGTATCAGAGCATCCTCCCAAGCGGGAGCGTCAGCAG  
CTGCAAAATAGAAGGCCGAATACCCCATGT CATAACCGGCGTTATTATAGGCATAAAGGCTCA  
ACCGCTCCCAGTTGGGTAACGCCATCTGTATCCATAAAGCGGAAATGAAAGAGCTTGTGTC  
TGGAGTAGTTGGCTGCCCTGATGAATAAGTAATAGTGTACTTGAATGCTATCAGGGTATCAC  
CCGTCTCAACAATGTTATGGACCGCTTGAACATCATCCAGGGTATAGGTAGTTGGAGTAGCA  
GGGTGACAGCCAATACTGGAGCAGCAGTAAATAGCGATAGTATTATGGCTATTACTGTTGC  
GAGGGCTGTTCCGGCTAAAGACCTTCGTATATCTTCTGCGCATCTCTTTATCACCATGAACGAC  
AGGGGGTACGGGGAAGGCATCGACCACGCCTCCAGTTAAGCAATGTATTCTGTGTACCC  
AGCGGGTTTTGCAAGTGCCTGGTACTGCGATGCCAGTGCGCAAGGATAAGTTCTATATCAT  
CTCTAAAGCCTGAGATATCTCCCATCGCTATACCTACCACTGTTAGCCTGATCGGTTTTACCC  
TTTTCTGTGTTATCTCCATGCTCTAAGTCTACCAACCTCTCAAATTAAGTAAAGGCAATTCAG  
GTGTTTAAGGTATTTATATTAATTATTCATATACCCTCAGTGATTTTCGCACAATACGTTGTGC  
GAATTGGGAATTTAACTGGTTTATTATTCATCTCAAAGCCAAGTTTGACTGAAAGGAGGTGA  
ATAATTTGAAAGTATTTGGTGC ACTTGCGGCTATATTTGGAGTCATCCTCCTTTTTAACTTCA  
TGCCAAATCTGACTAACTCTACCCATGATCTACAAACGGATGCGGCTACCCAAGCTTTTTCT  
GCCGTGACTACTGGAGCCGGTGAGACAGCTGCTGATGTAGTACTAACTACAGATCCTTACCA  
GGACCGCACTACCTCAATAACTGGTATTACATCGGACAATGTATTGGATGTTGACCCACTGG  
TTGCCGCCACTTATACCACCGCTACCAATACCCTACATGTCACGGGTCTGGTAGCTAGTCAA  
TCACGAACTTTGACCATCGCTTATGAGACTGACGCCCTATCGGACTTTACCATGATGGGCAC  
AATCGTTGGTTGGACACCGGTTTTGATTGTAATAGCCGTTTTAGCAGTTATTGGCGGCACAAT  
CATGGCCCTGATTCCTCGGAGAGCATAATCTCAACATTTTAAACAAATTAGTAAAGAAAGGA

GGTGAATTGAAGTGAGTAGGATGTAAATATTGGTGGCGCCATACTCGGAATCATAGTTTTG  
GCTGCCTTTTTCCCCGAAATGACCGCAGCTCTTCAAACGCTGATGACCGATGCCAATATAGC  
CGATTACACCATGTTTCGAAACTGTCCTTGGTTGGACTCCGGTCTGCTCTGGGGCGGCGCTCT  
CGGTGTTGTAGGCTTCCTGATTGTCAAAGAAGTCAAAGCTTCCCGTGGTTCCGCCGGCCATT  
CTGGCCGCCGCTGCGCTAACTCACTTTGAGCACCTATGTTATTTGGGCAGAAAAACGAGT  
ACACGGAATCCTTCTTTAACAGAAGACAGCAGGTGTTTGCCATTACTCCTGCCCGTAGACG  
TAGGATGCGTCCGTGATGATAAGTCGATGCAGGGATGGGCATTGCTATCCGATTGCTGCTTT  
CCTCAAAGAAAACCTCAAATTCCTTTGAGTTGGTATGCGAACGTGATGTAGTTCCCATCTC  
TGTATCAGGCGACACAGCTAAGCAACAGAAAAACGGTAAAGACATCGTCAATCAAATAGGC  
AGAGAACGCCGTAAACAAGCTCATTTTCATGCTGGACCCTGAACTAAAAAAGGATAGAGCAG  
CAGATATCATTCACTCTTATCTATGGTGGAGGTGCCACTTTGGTTTTGATGATGATTGTCG  
GGTTGTTTTCGTCAGGGAGGTTAAAATGGCCATTCTAGGGAAAAGGGACAGCACTGTCACA  
ATCCGTACACTGGTAATAGACACCCGGTCTGGTTGGGATATTGAAAATATCGAATCTGAAAT  
CATAGGTCAATCATGGAAACGCTATTTATATGATGGCAAATGGCTGCCAGTGGTTATTCGTG  
ACTATGCAAATGATGGTTCCCCTATTTATAAACCTCCGATATTGCCAGTAGGCATGGCAACA  
CCTCCTGAAAAACTCTACCGGGCACTTATAGCCTGGCCCCCTGTTGTTAAACGTTTCTGTAAA  
TCCATGAGCGATATTTGGGGAACGCTAAAAAAGGGCGCCTTAATCGGTTTTCTGGCTGCTAT  
CTTGGTGGCCTTGATTTTAGTTTGGGGTTCTATGACTGGAGGATGAGATGGTGAAGAAAAAT  
AACAAACAAAAGAAGCTATTGAAAATACGGTACCTCTCGAAGCCACAGGTATTACTGAAA  
ATCTACCGCCTGAAGGTAATTTGATGCGTCACCAGCTCCCTCTGGTGGTCTAACTCGGGAA  
AACTCGAAGGCATGATGACTCAAACCAGTATGCCATCTATCGTGCGTGAACACTACTGGAAGC  
TGGGGATGATCCAGAAAAGCTTTGGATGCGCACGATAATAATGAACAGTAAGTCAGCGGAG  
GCTGAGAAAAAACTCGACGCTGCTCTTGCATTTTCGATTTATGCGTTGAATTTGATGATAA  
ACAAGGTATGGATTATCTGAGACGCAAGCTTTCCGGTTGGGCATCAATTAATGGTGCGGCTC  
GGGAACAAGCCGTTGCTGCGGTTACCGGTGAACGTTTTAGGACGCCAAGCCCGGGCAAAA  
CGGTAACAATCCACCCCCACAGGTAAAACCTATAATGGTTGCTATTTGGGGTTTTATTGGCCC  
GGAAGGCGCTGGCAAAACTACTGCCATGACCTACTTCATGGAATATCATATGGCACTAGGG  
GGTGTGTCAGATCCTTTCCGGGCTATACCTTGATAGCCCTAAGGGCAAATTGGTAAAAGA  
CATCGATCTTAAAGAGCTTATGTTGATGTCTGGGGAGCTTAAAAATGTTGTTGTGGGAATTG  
ACGAAATTCAACAATTTAATGACTCGTCCCGTCATATGACCACTATCAACCAACTGACAGGC  
TATGTTGGCATGCAACGTCGCAAGCTTTCTCTCGGCATCTTTTATACCTTGCAAGACTGGATG  
TGGCTGTATGACCGCATGCGTTGGTTAACTCATTTGTTAACAGTATGTTCTGATCTGCACTTC  
TCTCCCTGGGGTAAGGAAAACCATATACGACAAGGGCAGTATATGTCTATCGTCACTTACGA  
TTGTAAAGGGTTTTTACTGGCCAGCCATGGTCTCAATTATCTCCCATGGTATTACGTCTCA  
AGAACTTTGGCCTTATTATCGCTCTTATAACGTATTGGATATTTTCGAAGGTCAAGAGCGTAT  
CCAGATCAAGAAGCGCCTGACCGTTTATGATCTTAATAAGGAGAACCCGACCTTTGAACAAA  
TTAGAGATGCGGCAGAGCAAACACCTCCGGTTCGGATTA AAAACACCACGAATGACCGATGA  
TGAAATGGCAGTATATCAGCGCCTGGCTGATCAAGGTGTTGATATGAGTACTATCCGTGAAG  
TTGAAAAAATGAAACGAGGAGTGTAATTATGACACCTGAAACTGCTCAAATTATTGCCGATG  
CCATTAATTCCTGGGAGCTGCTCTCGGGGCAGCTCTTGGTGACTCTATGAGCGAAACAGTC  
AGCACAGCCATAAACACAGGGTTTCTAAGCTTAGCGGCTACGTTAGTAAATGTATTGGTCAT  
GATAGCTGTGGTAGCTGCGGCCTTTATCAAACACGATGCTTGGCTCTATATCCTGGCAGGAA  
TTCCGTCACGCTGTATGCCTGGGGACAAATGGACAGTGGCATTGCTGGGAATACTATATTG  
CAAAATTCTCCGTTAATTATGCTGGGTTTGTATTTAATCGTCTCGGCCGGAGTATATGCATTC  
CAAAGTCTCCAGTCGAAGCATCAAGGAGGTTAAATTGTGGGTATATTATTAGGTCCCAATCA  
AGGGTCTGTAAATAGGCTGCTTCGGAACGGCCCGCCTACCCCTCCCAATAACCAGGTGGCCA  
TTAATGCCGCCCTGCAATCCACTGATAGCTCAGATGCTAAGAAAATTACCACAGTTAAGATG

CTGGATGGCAAATGGACAATTACCACTGACGGAGCTGTGTATAACATCGATACAACCGGTA  
CAACAGAAGATACCGTGAAGTATATAACCAATTACCTGACCAGCCGCGGGGCGTCTGGATC  
TGTTATCAAATCCGTTACAGAGCAGATTCCGATTATACAGACAAAGGAATCTGGAAACGTCA  
TTAAGAAAAAACAGTGCAACTATCACAGATCCTAATGATACCACCAAGAAATACACTGC  
TGAACCTGTAAATGAACCCGTAAATGATTCTAGCAGTGATACTCAACCTGACACCGATGTAT  
CAGTTACCGTGAATAATTCCACGGCATGGACCTTTACCACCCCAACGGCACAGTCTACACC  
GTGCCCATGGAGGGCTTAGCCTGGTCAGATGGGGCTAAGATGCACGAATACATAGTCAACT  
ACTTAAATAGCATTGGAGCCCCGCAAATGTCGTCCTGGAAGCTGTTAGCCGTATGCCCGAT  
GTAATGGGCGATACAGGCTTGTACGCGCCAAAACCTGACGAATTTGGTAATGAGATAGACA  
ATACTGAAGAGATTAAAAACATGATCGCAGGGAGTGACCAATCTTTAGCTGCAACAAACGC  
TTTAAAGGCATTCTTAGACGCTAAAGGCTTTTCAAGTTTGTCTCTGAAGATCAGTTTAAAAA  
GGCTCTTGAATACGGGATAATACCGGCTGATTCAGTGTATGTGCCTCCTGATGCAGGTTTTG  
ACAAGGGCAGAATGCTCCCGAAGGCATGCCTGATGATGTGCTGTGACCTCGGTCTACTC  
CCCAAATCCGAGCAGATTGAATTCAATATGCCCAACTTTAACTGGGCGTATCTGCCAAAAGC  
CGATGCAGATAAGTATTTGCTGAGCTTGAAGCTATTGTTGGCTATGCAGTAACCAATAAAA  
ATCTTAAACAGGCTATCAGGGAAGCCAATGCTACCGTAACTAGGGAAGCCAATGCTGCCAG  
GTCAGAGGCAATTGCATTA AAAACCTTCTTAAAGTTCTACCGGTGATAACCAAACATTTGACA  
TTTTTGCAGCCTACAAAGCGGGTATTCCGGATAATGTTATTGAGAGAGCAACTGGTCTGTCA  
AAGGCTGATTCCGTAGATATCAAATACATGCTTAAATACGTTGATGACAAGGGAAACGTAG  
ACATTCAGCAGGCAGTATCAGATGGTTGGGGAAAAGGAATACTTCAACAGTGGTTTTGGTCTG  
TCCGATGCAGATTTCAAAAACGCTGAATTTGCAGCTGATTACGAAAAGGCCACCTACCTTGA  
AAAAATAGGCATGGCTACAAAAAAGACCCGGGTGAATTCCTTAAGAACATGGGTATTGCC  
ATGATACCTATAGTTGGGACGTTAGCATTTTGGGAAGATAAAGAAAAAGGAACTCTAGCTG  
ATGACTTCACATCATTATCGAATTTAGGCAGTATTGCTCTTGATATCGCAATATTTATACCTT  
TTGTAGGAGGTGTTTCGGCCTTAGCCAAGACCGGCATCGGCGTTGGCAAGGCTATTGCCAAA  
GAGACCCTCATGACTACCCGGGGGCTTATTGTGGCTCCTATCACAACCGCTCTGCACCCGAT  
AGCTACTACCAAAGCCATCTTCTCTCCTTTGGGTGTACTACTTAGTAAAGTTAAGCTACCTGC  
TGCGACATTCTGGCGCGGCTCTGGCAGTCAAACCATGGATATAGCCAAGGTGCTGGCTAACC  
CTGCCTCAGTAGAAACAACCAAAGCTATGGATGAAGCCCTTCTGCTACGGAATGGAGGTAA  
GGCGTCTGGTTCAGTACCTATTACAGTTGACGGCATTGAAATCGGTAAAATCAAATGGTCAG  
ATGCCGGCTTCCAGACCGTATTTAACAATTCCATGGGGCATTCCACTCCCTTTGGAGAGCCA  
TTCACTAAAGGGATTATGGCCAAGACGAAGGCCTGTTTCTAAGCCCAACATGAACTTGGG  
ATTGACATCCAAAAGTGCTACCGGGCAGGTACCCGGTTATGTCTTTAATAACAAAACCTCTGG  
TTGGGCAGATTGGCGAAAACGGAAGGCTGGTTGATAGCCATAATAATGTTATTGGCCAGATT  
GCAGACAACCTCTAAAGCCGTATCAATAAAAAATACCAAGTTAGGCACTGTATCCGTAGAAG  
ACAATAAAGCCTATCTGATACGGCCTGATGGTACGCGGGTTGAAGTCAAACCTCAAGCTGGT  
GGGGCTATTGTGGCTGATAATCCTAGACTGCTGGGAGAATTTTACTTCGGTCAGCCAGTATA  
TAAAAACGGCAAGAAAATCGGCACTATAAATGGCAAGGGTGAAATAGTCGATTTAGACGGT  
AAAGTAATAGGTAAAGCTTCTCCAACGTAGTCGGATTTCTGCCTCCCGGTACCAAGGTCTT  
CGGTGAAGGCAAGGTGGTAGTAGGGCAAATTAAGAGACTCCTACCTTTGCCGTTATCTACA  
ATAATGGTCTGTACGTCTGCCGGATGCCGTTTCAAATTCACGGACTATGGACGAAATGGCC  
GCCAAAGCCTGGGAATACGTAAAAAGTGATAAGGCCGTAGGTGAAACCTTCCCTGTATTTA  
AACAGTATGCTAAATATATAGAAGACGAAGCTGTCATGGCCAAGGGTGGGCGTGCTATACC  
CGTGCTGGATGATAAGGGAAAACCGGTTGTATTAATACTGTTGGCCCGGACGGCAAGAAA  
ATTAACGTTCCCCTGCTGCAAATGGTTACGCCAGACTGGTTTTGAAAAAAGTCTGGAGATTAC  
CAAGGTA CTGCCGCAAAGCCGACACCCTTAAACCACGTCCCCTCTCGCAGGTA CTGGAA  
AGGTTGAATCCCTGCCTAGAGGTATGGATGATGATTTTCTGGCTTATATGCGCCGAAACCCT

GATAACGTCCTGTATGGCAGCACAGCCGAGTACGCTTTCACCGGTGGCCGGAGACCCGGAG  
ACCTGGATATCCAGTCTCCACACCCGGAGAAAACCGCCCGTGATATTGCGGATATAGCTCGC  
CTGCATACCTCAAATAGAATCAAAGTGGAGAAAATTGCTACCCACTACACTGTCTCCCAGCT  
TAAAGACGGGCTGTGGAAGAATATTGCAGATATATCGGAACTAGGATGGAAGAAAAGTCGAT  
GCTGGGTTTAAAAGGCTGAATGCACCTATCAATACAGTAAAGGTAGAAGGCATTACGATGG  
AAGCGCCGAGCACTCAGCTTTACAGCCTGTTAAACCGAACTTTGGCAAACTTTGAAAAACAG  
GACCGTTTTACCGCTATGGTAAGTAACTGGGCGGAGAGCTTGATCTTGGTATTGGCGCTAA  
AGCCCCGTCCCTGGCAGATCTGTACCGTCTGAAGGCCAAAGGCATCTATAATACTGTCCGTG  
ATATATTCGTGCCGAATCTTCAAAGAAGATTAATTATGAAGCCTTAGCTAAGTCCAATCCG  
GAATTATCAGCTAAAATTGAGAAGGTTTTTGGATGCCAGCCCGGATGCCCAAAGCCTTGCT  
GGCAGATATAAAAGAAGTCTCTCCAACTAGCTTCTGAAATTGAAGGTTTACTGTCTGATA  
GCAAATCTCAGATAAAGCCCGTCTGGCAGCTGCCAGCAAATAGCGCCTGATTTAATACCT  
GAGGTAAGGGAGTTTTTACGTGCTGAGCAGCGGTCTATGTCTGCTGCCCGTATAGCTGCCAT  
GACAGCCGGACGGGATGGACGAGCCAGTGCCTTAATCATAGCTGGTAGACTCGCTAAAGTG  
GCTGCAATGGAGAAAGTACGGCTTGAAGAGGAAATAAACC GGCGTGCCAAGCTGATAGAAA  
AGGAACTCCGCAAGTTACCGGCACGCATGCCGGGCATTAACAGCCTGGATACAACAAGAGT  
TACAGCTAAGACGTTAGAGAGAAGATTACGCACAAGCAGCGGAGATTATGCCAGTCTGCGT  
GCGCGTGTACCGCCATCCAGAGGAGAACGGGTACCGCCACCTCGTGTTCCACCGGCAAAC  
CGCCTAATAACCCTCCGCCGCGTGTAGAGCCGTCACGTGTCAAACC GCCAGATTTTAACTAC  
AGAGGCGGCAAAGGACACACGGATAGCCAAAAGACAACGATACCAGCAAACCAAGACTG  
AAAAGTGGCGATGTGGCATGGAACAGGGGGAAC TGGGCACCGGTGATGATAAACGCCCGG  
TCTGGATAATAAACGTGCCAATGGCACTCATGAATATGTTTTCCGTCCGCCGGAAGGGGCG  
ACCCGCTTGGAAGGTACTCCGGCAGAGACTTTCTTTACCAGAGGTAAAAACCTCCCAAAAA  
ACTGACTCAGGAAATGGGCGTTACCACTGCCAAGATTGACCTTGAGCGCAACCCGAGGATT  
GATTTTCATAGCCACTACGGCGCCCAAGTTTAAACCCTATATTCCAAGAGTGTTTCGGCGGTC  
TATAGGTATGTGACAAAGTGTGCAAATATTCTCGGATATAAGAAAAGGCCGAGTATTTTGC  
TCGGCCTTTTCTACTTCCCTCAGTTTTTATTACCATACATGCCCATCTTTGAGGGATGAATTCTC  
CGGGATTTTGAATATCTGACTGATATCATACTGAGCCACTTCGTAACCAGTGTA AACATAT  
TAGCCATGTCTCCAGTTCACTCATGGTAGTTTCTGCAACAATCTCTTTTTGATTATATCATC  
ATAAATTTGGTAAATGAGATCCTTTGTAGCATTGCTGAAAGCCACGCCTGGGGTGCTTTAC  
AGAATCCGGCATCCATAACTGCAGTAATACCCATATCCTGTAACAAGTAAGGGATATATTCA  
AGCTTCACTTTATCCTGTGGGCTATACGGCCGTTCCCTGATACTCTTAGTTTTAGTTACCATCT  
GCTTTACTCCTATTAATCCTAATATTTCTATAGTATACTATTATAATACTAGGAAATCAAT  
AGGATTATTGCGCATTAAATTAATTAAGTTATATGATATTGCTATGATAAAAACATTGAGAGA  
CCATCGATTAGATAAATTCTGGAGCCAAGCTGAGTTAGCGAAACAAGCGGGTATCGGAGCG  
GATACAGTTAATAGACTCGAAAATGGCAAACAAAACCCAAGTTTTATTACTGTACGCAAATT  
GGCCACTGCCCTTAAGGTAAAACCAGAGGAAATTGAATTCTAATGTGGGATTGGATTGTTTTG  
GGTATTTGTTGGAATTCTGGCTTTATCTGGAATTGCTGGCATATTATCACTAGATACTAGAGG  
TAGATCATTACTAGGGCTTGTCTTAATTGTTGGTGCTATAATTTGCGCTATCACTGGCGTTGG  
AGATAGTTGGACGCCAATATTACTTTATTTGATCGGCGGATCCGCATTTATTATATATAACCT  
CATCAAATGGGGTCAGCTCCGGGATTACTACTGGCTGTGGTGTATGGAGACAGATGAATTCT  
TCGGCCCCTTCAAACAACGATATTGAGATAAAACTTTTTTCAGCCCCACATTACCTCCCAGGC  
GGGTGGCAAATCTTCTGGATACCGGCCAAAGACCCTCTAAAAGCAACTAAAATCATCCGCA  
AGTGGGTTGCAGATGCCGAAAAGTGCCTGCGGAAAGACCCTGAATACAAAAACAGAATGCC  
GAAGTAATACTTTTAAAGATATTTAGGATAGGATGAAACAAATGGCAAGAGTAAAATGGAG  
TGGGTTTATTACAGAGCAAAGCACCTAAACGGTACGAGTAAGCTTGTAACACGGAAATTTA  
AGGTTTGTCCAGTATGTTTAAGTACCTATTTTGAAGCATCATATCAACCTGGTTTTTCATCCGC

TGGCCAGATATTATTGTAAAAACACCACGGATTCTTTTTTATGCCCAAGACACAAACAGAA  
ATTATCCGAAAATAATAAGGAGATCAAAATTATGTTAGACCCACAAGTACAAATTGAACTA  
CTTAAGCGAACATGGGACTTAGCAGGTATTGAAGCCAACCAATACGAAGATATATCTGTTTCG  
GAGAAAAAGATTTATAGATGTATTCGATAAACTTACACCACTTTGGCTACCATTTTAAATA  
AACCATTAATTCCTAATAATAGAATTAAGTTTTATTTGGTCTGCGGAATAAATTAGGCCGG  
ATTAATAATCCGGCCTTTAGTATATCTGAAGTCTTTATTTAGTTACCATACCTATCAATAAGC  
TCTAACAACCCATCCCTACCAATACCCTTCAACTCCAGCTATAGCTGCAAATTATCTACCGG  
GCTTGCTTGCCGGTGGACTCTCATCATATCTTCTGTACCCAAAGTAGAAGTATAACGCCTGGT  
CATAGCAAGAGTAGTATGCCCAACATGATTTGCAGGGTAAACTCATCCCCACCATTACGTA  
GATAGTTTATAGCTGCCGTATGCCTGAAAGTATGAGGTCCTGGCTTAGCATCAGTGATATTA  
GCCCTCTTACAAAGCTTTTTTATGGCTTCTGAACACCACGACAAGTAAGTGGTCGACGTTCT  
TCTGTTAACATAAACATTGATAATCATCATCCCTATTAAGCATATACTTTAACAAGGCTTTT  
TGGGTCTGTTTGCCTATTCGAACAATCCGTTCTTTTGACCCTTTCCCAAATACACGAACAGTT  
TCTTGATTAATAATCGATGTCATTAATATTAATGCCGGAAATTTCTGCTAATCGTAACCCCTGTA  
TCCATAAACAAAAATATTAAGCACGATTGCGTAATCCTAAAAAACTTGTTTTAGCATTAAC  
ACCCAATAATTTTTTATGTCCCAATTGAGAAGGGCTGGATTACTTTCTTATCTAGCCTCGG  
AGGTTTTAATGTGCGCATTGGATCGTTTGCAATATAAGCCTCTCTCATTAAACCAATGTATAAA  
GGCTTGGAGTGCACGATAATATGCATTCACAGTGTTATTCCCGCACCCTTTTTCTTGCAAGGA  
TAACAGGAATGCCCGTATTAATTGAGGAGATATTTTCAGAGGCTAACTGGAGACTGAAGCGA  
TGACAAAAAGACACAAAACAGTTAACACGCCGACGGTAAGTATCAACTGTTTTTGGAGATTT  
ACTCTCTACTTTACATGAAATTAAGTAAACTCGAGGAGCCTTTTTAATTCATTTGATGCAGG  
ACTGTGCTCTATGGCACGAATGAGCTCATCGTAATTAATGTTGTCAGGACTGTGCTCTTTCAA  
TTCATTTTCGGCACGGGGAAGGCTGTTTTTGACTGTTTTTAGCTTTATGGTGGGCCATCTTGG  
TCTCGAACCAAGGACCTCAGTCTTATCAGGACTGCGCTCTAACCAACTGAGCTAATGGCCCA  
TTTGATAACAATATAAACAACTCAATCTTGAGCTGTGCAATGCATTAGCAAGTGAATTACT  
ATTTGAAAAACGTCATTATAATATAGCAAACAGGATGCCTAGCGCAAGTCCCTTATCACCAT  
GAACACTGATAAAACAGGGATAAGTTAAGCAGATGTGAGAGTTCAGGTTATCAGCTTTCAG  
GGAACTAATTTATCCCTTATAACACTAACACCTTAACCTCTGGATAGCGGAAAGAAAAGC  
GAAGTATCCGTTTTAAGTCGGATATCGACCTAGGTTAATAGGCACGAGGCCAATTATCCTTA  
GAAAGGAGGTGATCCAGCCGACGCTTCC

>Dmc\_IME1-14

CAGCCTGTACCAGATATGGATTACGTATAATCCCCAGTTCTCCGGATTGTGTACCCACAGA  
TTAAACACATCTCTTGATGACATGTCCAAAGGCCCGGTGCATACGCATTTCGCTATACTCAGA  
TTTTGATGAGTGATGCATACCACCATTTTAGCCATAATCCGGCTATTCTCTTTAGCTAAACG  
ATATAGCTTAAAACCTCCAGCGTAATCTTGGTGCATATATTTGTTTGCCTTTTTGTTTATCAA  
CCGGTGTATGGCGTAACTGCTTAACATCAATAGCCTTCTTACAAATAACTAACTTACAGTAT  
AACTGAATTACAGCCTCATATTATCCACCGGGCTAAATTTCTTATGTTTCTGGACTGCATGTT  
CACTCTTCAAGCTGGCTGTATAGCGCTTAGTCATAACCAAAGTGCTGTGTCCAAGTAGAGAT  
TGTACTTCAAACCTCCCTGCCCGTTTATAAGCGCCTGAGTAGCAAAGGTATGCCTGAAGGT  
ATGCGGACTACACCTGACACCGGTTAGACCGGCTCTTTTGCCAAGTTCACGTACTACTACCT  
AATTCCTTCGGTTGAAAGTCCTGATCCGGTAGTTGACATCCAGAGTGCCGGGCATTCATCCT  
GACGGGTGAGAAGGTAACGCAGAATGGTTTCTTGGGCCTTATGTCCAATACGGACTACTCTT  
TGCTTGGCACCTTTGCCCACTTACTATTATGGTTTCTTTGTCAAAGTCTACGTCTTTTAACTGAA  
TAGCCGACATTTACGATACTCGGAGTCCGGTATCCAGCATGGTTAGTATCATGGCTTTATTTT  
TTAACCCGATGGGACTGTCTCCACAAGTAGCAAGCAAATCTTCTATCTGCTGCCGGGTAAAT  
GGCCGGATTATCTTTGCTCGGTTCCGGGGCGGTTTGATAGTTGCCAGCGGGCTTTTTGAAAGC

ACGCCTTCCTCAATGAGCCAGTTAAAGAAGCGTTTTACAGCCTTGTAGTAATCAAGTACTGA  
GGTAGGGTTATTGCGTTCCTGTAATTTGACTAAGTAAAGTCTGACGTGGTTTTGCTTCTATTTCT  
CTCAACTGTATTGATACCCAATGTTTGGCAATAACCCAGGAATGAGTAAAGGGCATAGGTAT  
AGTAGCGGATGGTATGGGGTGAAAGACGGGCAACTTTGCATGTCAGGACAAAGGCATTCAG  
CCTTCCGGAAAGGTTTTTCAAATTAGTTAAATGGTAGGTTTTAGCTTGGGGCTGTTTCGTGAG  
AACCCGATGTAGTTAAATGGTAAGAAAGCATTCTTTTTGGCTACCGGGCGGTGCTTTTAGCT  
TTATGGTGGAGCCGGAGGGATTTCGAACCTCTACCTTTTTGACTGCCAGTTAGCCCCCAAAA  
ACCAAGCGCTACGAACAGGTATTAGAATGCTCTACTTCTCCCTAAAATATTAATTTTTTATTA  
ACTTCGACTACCACAGCACTGGCCTGACAGTCTGATAAAGAATGTGTCCCATGTCCGTTCTTT  
AAATAAAGAACACCATTTTGTCTATCAATTTCCCTACTATAACTTCTCCGTCTACAACGCAG  
AGCAGTATATTCCTTTTTGCGGGGTTCTATCGCGATCAATAAGCAATATATCCCCTTCACTT  
ATCACGGGTTCCATGCAATTACCACGCACCTTATAAGCTTCTATATTCTGAGGCGCAAACT  
CTCACGCGCTCTATAAATATATTCAATCGGAGCTAATGCAGCATCTCCTGCATGTACATAGA  
AATGGTCATAGACAGGAATACTCACAGGGGCCATCAGTTGATATTTTCTCAGAACTTCTTCG  
GGAGATTCTAATCTAACTATTTTCAAGGTTCTGTTTTGAACTCTTTGATATCAACACCAGCGCT  
CGCGCAATTTTTGACAATGCCTCATAACTAGGCATAGTGCTTTTTGCGTAGTTCTAGCATCGAA  
ATATAACCGCGAGTTAAACCACTTGCATCAGCCAGCTTAGCCTGTGTCATGCCGCGGGCTAT  
TCTTAATTGTTTTACCTTTAATCCGATTTGGATATCCATAATAACCCTCTGCAACAATGGTAG  
CATAACTAGGATAGCAATTGCACGATATTTGCAGATAATAAGAGATATTGCGCTAAGTATAA  
TACTTTAGCATACTGCAACTATAGTATTACTTGCTCTGGTTACCGCTCTACCATTTTACTCC  
ACATGAGCGCTAATGCAACAATAGTTGTCATGAATAACATCACTGTAGCAAATAATCTTCTT  
AGTGCCTTAATCAATTTACAGGATGATCTGAAACTAAGCAATACGGCTTTTTGCTGCAAACT  
TGGTATTAACCGGCAGTTGTGGCAAATGACAAAATCGGGCATTAGACCAATACATTTAACA  
TACTTAAAGCTGTTATTTCGTAATTTCCCCCAACTAATTCCAGAAGTAATAGTCCATATGAGTA  
TTAAAGATGGCAATGAAACTAATAACGAGACTCTGGACGTATTGGGGGGATACAAACAG  
TACTACCCATGGCACTGATCACATGCGAAACATCGGTAAACTCGGTGGACGGCCACATGCT  
ACCAATTGGTTAGATTTGCAGGTGCGACAAATTCAAGAGAGAAAAGAAAAGGAAGGAAAA  
GCTACCGACAGCCTTACTTTGACTCAATTAAGCACCTTGTA AAAAGTGTAGTGGAGGGTGG  
CTACTAGTCTAGCTACCCTCCAGAAAGGAGTGCAGGCAATGCCTCAACAACAAGTAAATT  
ATCGTATCAAGAATGAACGCACCGGTCAATGGTGGGAGGGAAAGGCTGATAGTCCAATGGA  
TGCCCTACGGAAATCTGCCCTCGAATATCCGGTGAAAAACCCTAAGTTTAGCTGGACGGCTG  
AGAACTGCTGGGTACGCCAGTGGTGCTCCGGCGGTTACGGATCATGGGTCCTCTGACTATG  
GCGGCAAGAAAATGGAGATGGTGCAAGCATGAAACTCTTAGCTGTTTTCAAGCAATCTCAT  
TTTCTGTTGGCTTTCCGGCATTATCTTCTTAACCGCCGGCGTTGGCGGCTTTGGCCGGATAACC  
GAATGGCCAGAGCTCATTATGTGTATTCTGGCGACTCTGGTCCGCCCTGTATATCCTCTACGCA  
GCCTATAAACAGGCCTGCAAAGAAGCTGAGGTGAAGAAATGACTAGCGGAATGGTTATCTT  
AGCTGAAATACGTACCGAGACTGAACAAGGACGTCCTGCCCTACTCCGGGCTGGGAATGG  
AGCCCAGGGTGTACGCCAATTAAGACCCTAGTCCCGGCAAATGGATAGTCAGGCGGTCAA  
TAGATAGTTTTGATGTCATTTTCCATTTCGTATTTAACACCAGAAGCCAGAGAGGGGCGGTCCG  
GAATACCTCATAGACAGTTTTAATCCTACTGATGCAGGCGAATTAGGTGCCCGTGAAATGGC  
GCTTAAACTGCGCAAAGAATCTTACAGACAGGAGGCCGAACGTAATGGTACAGCGATATC  
GAATAAACCTATTGAATTGTACAGCGGCGTTATCGCCGAGGGAATTACATGTACTGCCAG  
TCCGGGCTGATCATAACTATAAATGTCCGGTATGCGGCTGCCTGGTACAGCCCGGAGAAGTG  
GGGTTTATGCGCTACCGGATTATACGTGACCTGGTAACTGAGCCAATTGGTGACGTACTGCA  
TGCGTGCTGTGTGGAGGCAGGGAAATGATGGAAATTA AAATTGGTTACCTACTGCTCTCTGC  
GGATCTACATCAACCCGGAGATGTAGATATTACCTTGACGACTGGAGATGGCACACTTATTG  
CTGTCGTTAGCTCAAAGACACTTATTACCGCTATTGAGGTA CTGGAGAAGACAGCGGAATAG

CATATCCGGATCAGGACAGGGGAGCGTGATCTCCCTCCCACCCCTCTGTCCTGAATTAATAG  
TAATCGAGGTCCATTATGACAATAGCAACACGTAAATATACGATAGACGATATACTGGCCA  
AACTCCAGGGCGTCAAAAAGAATGGTTCAGGGTTTATGGCCTGCTGTCCTGCCCATGAGGAT  
AAAAACCCTTCTCTCCATCAGCGAAAAGGACGGCAAGGTGCTCCTGAAATGCTTTGCCGG  
GTGCAGTTATGAACAAATCATGACCGCGTTAAATATGCCAATAAATGCCGCAGCACAGGAT  
ACTACAGCCACCTCTTCAAAAAACCAAAAGAGAGCACCAAACGGGAAATAAAGCAGACTT  
ACGACTACACAGACAGAAGCGGACAGCTGATATTCCAGGTAGTCAGGTTTGAGCCAAAAG  
TTTCTCCAGCGACACCCTGGCGGCAAGACCGGCTGGGTCTGGAATATGAAGGATATCGAGC  
CGGTTATCTATCATCTGCCAGACGTGCTGGAAGCGGTAAAAACAGGCCAGACTATTTGGATA  
ACCGAGGGCGAGAAGGATGCTGATAACGCCAGGGCTATGGGCTTGGTGGCCACTACCTCCC  
CGATGGGGGCCGGCAAGTGGCGCGATAATTATACTAATGACTTATTGGGAGCCTCGCAAGT  
AGTAGTTATTGCCGATAAAGACGCTCCGGGCCGTAAACATGCCTCCGATATTGCCATGTCCT  
GCCGGCGGCAACGGATACCGGTCAAGATTATCGAGGTACCCGGCGACGCCAAAGATTTTAC  
CGAGTGGTTGGAAGCCGGCGGCCAGACATCCGAATTGGATGATCTGGTAGCTACAGCTAAG  
AGCTATACGCCATCAAAAAACCAGAGCTTATACTTTCTGTCTGATGGCAAGTTTTCTATCGA  
AGCCGGCCGGATTATTTATCATTACATACAGGGATAATGTCCCCTACGATGCTCCGCTGTGCA  
ATTTCTGTTGCTGCCGTTAAAGAGGAGATCATCAAAGACAATGGCATAAACCGCAAAACTTTC  
TTCAGGATTGGCGGTACAGACTGTACTGGCCGTCCGTTTCCAGATATAGAAGTCCCGTCCGA  
AACTTTTCATCCATGTCCTGGGCATTATCCCAGTGGGGAATTAAGGCTATGATCGAACCCA  
GCCCTTACGCTGAACGGCTATTACGCGGGGCAATGCAGTACATGTCGATGGAGGCACCCTGC  
CGGATTATTTATGAAAATACCGGCTGGACTAATATCAACGGCAAGGATGTTTACCTTACTCC  
CCACGGCGCAATCGGAGCCGATAATGTTGAAGTGGAAATGCCATCCAATATCAGCCATTATG  
ATATACCCTCGCCGAACAGAATGACGATGTGAAGTCCTTCATTGAGGCCAGCTTTAATTTCT  
CTCAAAGTAGCCAAGTTATATATTACCTTGCCGCTGTTTGCGGCTATGTACATGACGCCTTTG  
TCAGACGCCATTGATACCAACTTCAACCTCTGGCTGATTGCCGGTTCTGGCAGCCTTAAAC  
CACGATAGCATCACTGGCACTCTGCCACTACGGAAATTTTGATTATACCTGTGTGCCGGCTG  
CCTGGCGGGATACTCAGAATACTGGAACGCATCCTGTTACCTGCAAGGATATGCCGGTG  
CTGGTAGATGACTGGTCAACCGGCCAGACCACCGCCTCACAAAAGAATTTGACGCTAAGG  
CTGACTATGTATGCCGCGGACAGGCTAACAGACAAGGCCGTAAGCGCATGTCTGCCGATAC  
ATCTATGAGGCAGGAATATGTACCCAGAGGCTTCTGATATCCACCTCGGAAGGACAACCGC  
CAGGCGAGAGCAATAATGCCCGTTTTCTGATCATTGAAATGTCAAAAACAGATATCGAATTC  
CCTTGTCTTACCCTATCACAGAAAGAGGACCATCTGTACCGCCGCGCTATGGCTCATTACCT  
GGCATGGCTGCAAGCGGACTGGCCGGCGAAGAAAGTGTATCTGCGCCAGCGCTACCAAGAG  
GTTTTTGAACAATTTACTGAGAGTCTCCGGGGTGAAAATGTGCATCTCCGGCTACCCAGATC  
CATCGCTCTGTTATATATCGGTCTGGAAATGGCTATTCGCTGGGCCGAAGAAAACGGAGCAG  
CGGATATATTTGATAGGTTTATAGATGAAAGCGGAAACGGGGAGAATGATTCAGTCGGGTC  
TGCGTATCTTTAAAACAAGCCCGCGAAGTATTTATTGAGATGGCCAAGCGACAGGGTGCC  
GGATAGATGAGGCTACACCATCGAAAAAGTTTTGTAAACGCCTTAAATGCAGCCCTTATAGCT  
GGTACTGCATATCTGGATGTTAAAGATGGGGCAAATCCTCGGTCTGCTTACCTGGGCAAAC  
TCTGATCGGTTGGGATGACCGGACTAACGGGCACGTTTCCCTCCATAATGACCTGGCCTACC  
AAGTAGCCAACCAGCATTACCAAAAAATCAATGAGGCTTTTGTAAAAAGGATGCTGTATTT  
ATGGATCTGGTGAAGCGTGGTTATGTGGATCCGGGTAAAGATGGTAAAACCACTGTCTTTGA  
GTATATCCCGGTAATAGCAAAGGCATGCCGTGTCCTACATATCAAACGTGAATTCCTGGGGC  
GGGATGAACAAAAGAGAGGTGAGTAAAACAATGAAAAAATGTGTGTGCGCCCCAAAATAT  
CCCATGTATTAAAAAATGGTGCAAGAAGTGCAAGAAAACACTGTTTTTAATCGTAAGCCAAA  
ATATTCTGAACGTGAAATTTCTTGCACCTTGAGGGTGCAAGAGGGTGCAAGAAGTGCAATAC  
AGGTGCAATACAGGTGCAAGAGAAGTGCAAGAAAATATAAAGCTAAATTAATAAATAGGTGC

AAGAGAAGTGCAAGAAAATATTAAGCTAAATTA AAAATACATACTCGTAATTGTCAATAT  
TTCTTGCACCTCAAAACAAATATATATCACTCAGTTTTAGGGTGACACATAAATCGGTATGT  
AAGATTGTTAAATCATTCTCAAAGGATGTGACATAAATGAAAGTCGCGTTATATGCCAGGGT  
AAGCACCCGCGATAAAAATCAGGATCCGGAAGTCCA ACTGATGGAGCTGCGGAAATATTGC  
CAGGAAAACGGCATGGAAATAACCAGGGAATATATAGATCATGCCTCGGCCAATGATTTTCG  
TCCGCAGGACGGCATGGAAACAGTTGTTAGTGGATGCATCTGCCCCGAAAGTTTCGGGGGTTA  
CTGGTGTGGAACTTGACCGGGCATTCCGCGACATTACGGTGGCCACCTCGTCCGTTAAAAT  
GCTGCGCAATGCCGGCATAGATTTTATTGTTACCACTGTCCCTGTTCTTTTCAGTCCAAGGTCC  
AGCTGGAGACCTGATGTTTAAACATCTATGCCGCTTTTGCCCAGTTTGAAAAGGACACCATTA  
TTGAAAGAGTTAATGCCGGACTTCAAGGGCAAAGGCTAAGGGTAAGGCATTCGGTTCGCC  
AAGAAAGGCAATAGACTTCAATAAGGTTTTGGAAGCCACGAGATAGCCTGCTCACGGGTT  
AACCGGATTAATAAGAAAATCAGGGTTATTCCGAGACGGCGAGGATATTGAGCGAGCAGA  
CCGGGCTAAGAATTACAGCCGGTTGGGTCTATAACCGGATAAAGGCCGGCAATTA AAAATGC  
TTCAAAAACCCACCCCCATTTTTGCATAAATTTTAAAGCCAAAATCTTATCGGATGGGAG  
GCTTCAAAAACAAATGATTTTTGAAGGCATAGTTGAGGTGACGGCATGACAGCCATATAACC  
AATTACAGTCAATAGGAGTGTAGATAGCTTAGAAGGGGATAAAAATGAAACAGCTTAAGCC  
AAAATGCAGGCATAAGTTTTATCAGGCAGGGTCAATCTATTATTGTTCCCGTTACGCTATTG  
AGGGCACTGATTTCTGTAAAGTTCATAATCCGGAATCAGTAGCAGCCAAAGAAAAGGAAAG  
GGAGCTCGGAACCTTGAACATTTTCGGCAAGCCAGAAACGAATTGATTAGGCAAATAATA  
ATAACTGAGATTTTTTCAGGCATTACCACTGAGGAAATAAGGAAAAACAAAGCTAAATTGA  
AAGCAGTATTTAAAACAGTATTTAAAACAGAGGCGTTGCTAGAACACTTCCAGTAGCCAGA  
GAGTACTGTCATGCATTATTTGAGGAGATGCTTGTCTTAAGGATTATGATAGCCTCCGTGAT  
GATAGCAAAGCGGAAATAAAGAAATGCCAAGTGCTCCCGTTTGTAGTTAACCTGCCACTAT  
CCGCAAAGCACTTGAGCTGTACGAAAACCAGCCAAGGAGAAGGAATAACAAATAAATGAG  
ACATCTTAAGGCGGTATGGCAAGGCGGTTTATTTATTGAAGGATTACGTCCTAAAAATAGAT  
TACACGAAAGCCCCGGAACACATCATTTAATAGTCACAAAGGCGAGCCCCCAATTTGATGA  
CCAGAACCTTATCGGTAAAAGAGTAGCAATCCAGTTTGTGGACCGATGTATTGGGAAGTTA  
TGGAATAAGCGCAAAAACGGCAAAAATAATGCCCTGCTTAGTGGTTTATTTCAAAGGTG  
ATTGTGCTAAACCGTAAGACCCCCAAAATTCACAATTGTA AAAAATGCAGTCCTATCTTAATA  
AAAATTATGCTAAGGGAAAGGAAGAAAAATGAAAACCGTATTA ACTAAAATCAAGGGCATC  
ACCCATTATTAATGCACAGATTCCCGATGGCGGGCGCAGACGATACATCAAACGACGTA  
CTGGTGTACCGGATTGGAAGGCAGAGGCAGAACTAGCGTTATACAAAGATGATCATGGTCA  
AATCTATCAGCCAGCGAGCCATATTGAAGCTGCGCTTAAAGAGGCCAGTAAAACACTAAAA  
ATACCAGGTAACGAGGGGCGACCTATTCAAA ACTCATTGGTTCCGCTGTCTCTGTTTCCCT  
GATGCTATCACTCATTTGGTCCAGGATTATGAGATAGATAGTCGCCCTGTTGTGATACAGAA  
GGCAAGGATAGTGCGTTACAGACCAGTATTTAAGGATTGGGAATTAGAGTTTGACATCAATA  
TAGGGGATGATCAAATCCCTATAGAGGTTATCAAACAGGCTCTCGATCATGCAGGGCTATAT  
GTAGGTATAGGCGATTTTCGCCCAGGGCGTGGAGGAAAATTCGGCAAATTCATGGTTGTGAG  
ATTTGAAGAGAAATAATATAGTCCGTAGCCCTGCGGGTTAGTCAGGTGAGGTATGGCTCGGC  
TTGGTTGGGCGTGGTATGGTCAGGTACGGTTAGGCACGGTATGGCAGGGTAAGGTTTTTAAA  
AGTGAGGGATAAAGGGCGTGGAAAGAAGTAGATATCAGAGAAATTCCTCGTTCCTCTTGCAAT  
CGTGTGATTTTTTAAAATTACACGAGAGGAAATACTCAAATCTGATCTTGAATCGGGAGTTA  
AAAAAGAGCTTCTAAATCTGTTGGGAATAAACACAAACAAAGAGTAATCAAGAGAGGGCGA  
AATGGTACTGAGACGAAAGGGATTCTGAACACGGATAATCTGTTCCAAATCTTATCTGCTT  
TGATGGATGAGTGTGTGATGAATTTGGGCCAGCAGGAGATGGCTGTTCCGGGTGTTTATGC  
CGCAGATCATGCCAGAGATTAATAGACTCGATAAATCAGGACCGATTA ACTATGCAGAAAT  
TTCATTTTTATAAACGTGAATTCCGCAAATTGAAATCCC GCCGCAATCATGATGGATGTG



ATTATCTCCTAAGCGAGGTATATAGACCCACACAGTACCCGCAGAAACGGGATAGAAAA  
CAACCACTTAGCCAGACTGGCAGTCCCGGCGAGGAATGAATAATCCCAGAATAGCAATCGT  
GGTATAGCATAAGTCAACAATCCATAAACCCACCAACAATATTTACTACGGTCACAAATAG  
ATTTCCGAGAACACTATCTGAGTACTGCATAACAGAGAAACCCAGCAGGGCATTGAAAAAT  
GATTGCTCCGGGTCACCAAGCCAAGTGCCTTCCAGAATTAAGCACATGAACTGGCCTACAAT  
ATATGTAAATGCCAGCCAACTAACCCTGCTGTCTCATCAGTAACTTGCCAGCTTTCTATTA  
ACCATTTCCGGATGATTATGATTCCCTCCGGCAGTAATACCCACCATGACGTGCCGATAAT  
GGCACAGAAGAAAATCTGCCATATGAGCCCGGCAGCGGCGCACGGCAATAACTCACTGGTC  
AGTCCCAAATAACCATAGTGACTATGGCTGCCCCAAATATACTAGCGAATACCAGAAAA  
AAGCAGGAGGGAAATCCATGTTTTCCAGGAAATCACTAATCGCTTGCCCGCCAGGTAGATTT  
TCAGGGTGCAAATCCCATAACCATCCGTCCGGCATTCTCCAATGTCATCATCTGTAATATT  
TCCACGGCTTCATCGTCTTACCTGTGATAAACGCAGACTGATTACAGGGCTGTATAGCTGAT  
AACTGATACAGATACATCCGCATCAGTAGTTGTGGTCCCTGAATGAGGGCGTAGCGTCATTGC  
CATTGCCGGATAAATCCGTAATGTGGCGGCGTATTGCCATTCCCACGAGCCTCTTAATACC  
CCGCCACTGTTATTTTGGCATAGTACAGGTAAGGCATCGAGCCGTTAGCCCAATAACCAA  
GTTGTTAGCGTTATCAGTAATAGAGACTGCAAATGCGGCTGAGCCCTCTAAGAGACCATCTA  
TATAGATATTCATCGTGCCTGCAGATAAAGATATCTTATATACATGTTCTGAACTGGATATAT  
CCGCCCGCGTAACGATTGTATTATTTGCATTTCCCTGTTATTGATATATTTATGTCTGTTGTAGC  
AGTGCCACTCCAACCTAGACCCTGAATTATTTGTAGTGCAGTATCTGCCGTTAGCATAACGGAT  
TAGTAGGGTTATACCAGTGAGTTAATTTATTAAGTCCCGTTTGGGAGTGACAAGACT  
ATTGCATAACGTGTTCCGGCAGTTAGATTAATTATATTGGAAAAATCAAATGTATGATTTAC  
AGCAGAAGTTGAGATAGTTGAAGCTACCACCGAACCGCTAACCAAGGCACTTCCCTGTTGGC  
ACATCGCCGCTAGTTGCATAGATGGCATAATTAATAATTTCCAGTTGGATTGCCTACTCGTTGT  
GTTCTAAAGGTAAATTGGTTGACAGCCACATCATTAGAAAATTGAAAGGTCTGTGCTATCCA  
GTTAGCACCGTACATAGATGTAGCTGAAGATGCAGTACCATTATATGGAGTTTCTGTATAAC  
TTGATGAATTACCTGCCGATACATCTGTTCCAGACGTATAAATCCAGAATGCTCCAAATTTA  
GATAGGTTATAGCCATCATTAAATCTACCACTTAGCTCAATCTCAAACTATTTCCCTAGCTCC  
AATGAGGCAGCATCAGCAACTGTCATGCCGGCTGTATCGGGGCAATAGGCCAGTTTACCGCC  
CATAGCAGTTTACCACCGGTATATAGGTTATAGTTAATAGCCGAATTTTGCCTATCTGGTC  
AATCCACATAATCCACGGATCAGATCCTTGCCCGGGCATAAAAAGGTATGTCATTACCGATGG  
AATCACGCATGGCGAGGTTATTAACCTCAGAATCTATATAATACCCATCCAGCAGACTATCC  
GTTGCCAGGTAAGGGCGCGGCAACATGTGTAGCTGTGTAACCTGGCATTGGTAGCCCGGAT  
ATTCGCCTGGTATATAGCATCTGTTATAGTTGAGGCTAAAATCGTGCCCGGCCAATAATGG  
TAGCCAGAATCAACATACCCACGGATATTATTAATTTCTTCATGCGTGCCTACCCATCAAAA  
CATAACTGGCATAACGCTGCATATATGGTAACTATCATTGCTAGCAGGACACCGTTAAACAAT  
CCCATATCGGTCCCACCGCCAATATATAAGAACTGGCAATCATTGCTCCGTGGTTATTTCG  
ATATTTCACTCTGCCCATATAAATAATCCTATTACCATCACGATACAAATTAGGCTGGTAAT  
CATTTGCCAGCTGGTTACATTATTGAAAATGGATGCCAAGCCTTCCAATATATCCCCGATTAT  
TGTTCCATCCCATTGATGAGCCCACTCATCCAGCTTTGTCATCACCCACACTCTTCTGGTCAT  
ATCCAAACCTGAGTTTGAGTCGAAAAGATCTTGGGGCACATGGTTTGGAGACCCGGAATTG  
TGCCCTTGCCATAAGCAGAACCGTATTCATTAACACCGTGCCCTGGTCAGTCTCCGTCAAC  
AGCTTTTGCACCCAGTTAATCTCCAACGCCCGGCAAACCTTCGATTATCCAACCTCCCATTAA  
GTCTGATTTTCTTTTTTTGTTTCCAGTTGGCTGTAGTCAGATGTGGTCAGAGTGTAATTGACC  
TCTGGCGGAATCTCCAATATTGGGGGTTACCAACCATCTTGAGTATCAGAGCAGTTTCCCA  
CTCCGGAGCATCATCAGCTGCAAAGTAAAAGGCGGAATACCCCATATCATAACCGGCGTTGT  
AGTAAGCGTATGGCTCAATTGCTCCCAGCTGAATAATTCCATCTGTATCCATCAGTCTGAAA  
TGAAAGAGTTTATTAGCCGGAGTGGTGGGCTGGCCGGATGAATAGGCGATGGTGTATTTAA

AGGAGACCAAGCTATCCCCTGTCTCTACAATATTGTGCGCAACCTGCACATCATCAATAGTA  
AACGTGGTGGGCGCAGCCGGGTCAACAGCCAGTACCGCTGCCGGCGGTAAGGATGCCAGAC  
ATAAGCAGGCAACTATGACGCCTTTATAGATTTTCGTAATAATCTGCCCATTCATTCACACT  
CATATATATTGCCGGTTCTCTGGGGAGGTCTTCTCCCTTCAGATAGCGATAGACCTGCATCCT  
GCTGATGCCGTATATTCGTGAGATAGCCGTAGCTCCAATACCATGCGTCTGCATGATATATC  
GCAGGTTATCAGGGAAGGCATCCTCATTCTTAAGGGCCTCAAGCAGCCGGGTATCTTGCC  
GGA ACTATTATCTTCTGTTCTTCCATACTTTTAGTCTACCTGACTGCCTGTTTAATAACAAGGC  
CTTAAATCTCCCTAATTATTTATTAAGATATACCTCAACTGTCACTTAAAGGTGACAGTTCA  
AGGAAAAATCTTGTCTATCATCATAGAAAACGAGAGGAGGTGATAAAAAATTGGGCAAGGC  
AATGTCAACCGTCATGTTAATTGTAGGTATCGCAGTTTCGGTTTTATTTTTCCCGATGGTTCT  
CTCCTCAATGGATAGTATTCAATTCGCATCCAATACCGGTACCTATGCCGCCGTAACGACCG  
GTGTCCGGCGAACTACCGCGGACGTTGTTCTTTCCACCGCCTTATACAACGATGATAACGGT  
CATGTTACCAGCATCACGTCTACGGTTGGGACAGACGTTCTGTGGCCGGCACGTATGTTGC  
TGCTACTAAAACCCCTGACTGTAACCGGTTAACGGCTTCCGAATCACGGACACTGACCGTCA  
TCTATGACTCCGACAATCTGTCGGACTACACCGGTCTGGGCACTATTGTCAGCCTAAGCCCG  
CTCATTATCTGGCTGGTAATTCTGGGTGCCTGGGTATCGGACTTTATTCCAACGTAAAGAGC  
TAATCCGCAAATTCATTCATAGAAAGGAGGTGACAAAAGAAAATGTTTAACTCAAACACGA  
TGAAGGTCGTAGGAGGCATTCTCGGTATAGCTATTTCTCTGCTGTTCTTCCCCATCGCCCTGA  
GCGGTATTGATGCCGTACTGAACAACGCCAATTTGGCCGACTATACCGGGTTGGAAACCATC  
GTAAAGATAACCCCATGATCGTGTGGGTGGGTATCTTCTCGGTTCCGGCTTAAACCCTGTTT  
TTTGGGGTCAAAGGAAGCCGCGGGGGCAA AAAAATCTAGGTCACGGATGGCCTAAAGGAGAT  
CGTAGCCATGAAGATACTCTGGATGCAATTTGGAAGAGACAAAACCCGGACACAGGACGTA  
CACGTCTGACCGAGGATGGTCGTATTGTGCAAGTTTCTGCGGATGTGCTTTATGGCTGCGT  
ATCTGTGACGAATGGGGTCAAGCATGGGTGCTAAGGGGTGCAGACCTGTGTCCCTCCCGTG  
ATGGTAAGGGAGACATACTGCTTGTAAATGAGCGGAGCTTAGCACCCATTGCGTTTGACGGA  
CGCCCTGCACGCACGCACGAAGAGGCGCTGAAACTCAAGGATGATATCGGAGCAGAAGCCT  
GTGAAAGTGTGCATTTTAAATCGTGACCGCGAAATAAAGAAAAGAAACCATGGCCAATGTACT  
CCAGGTA CTTATTATCGGTCTGTTCCGGCACGGTCTGTGTAATTGCTCTCATAGGGGTATATGC  
CTCAGGGAATGCAAAATTGCCATGGGTGGGTTAGAAGAAATGACAAAAGCATCAACAATTG  
AAAAGAACCAGGAGTTAATTGCCGGATTCAAACTCCTGAAGAAATAATTTCTGTCGCGTATG  
CAATCAGACCAAAGGGCTAAAAGGGAACCCGATGCCCTTGTTTATGATATGCGCCTAGGTTG  
GGCTCCGGAATATATAGATAATCCTATCGGCCATCGTAAATCATTCCGAAACAAGCGATTAT  
GCCCGATTATCAGGCGCTGGAAACAGTTACCTACTGGCGAATGGGAAAGCAAAATTGAACC  
GGTCCCTGAACCTGAAGATATGGAAGCATCCCCTCAAAGTCTTTACAGAATGCTGCATTGGG  
AACCTTTAGTTAAGTCTGCATTTGGAGGGTTGGGAGATATCTGGCAGAAGCTTAAAGTCCGGA  
CTGCTGGTTGTATTGGTAGGTATAGGGATTTTTGCCCTGTACCTGTTACCCAATCATAAGGA  
GTAGCTATCATGGCGGGATTTAAACGTAAAAATGGCGGGCCTGCAACCGGAGGCACTACGG  
ATACTTTAGGTATCCAAGATAACAATCGGTGCGGCCGGTGGCAACGGGTTTAAAGTCAGGATTA  
CTTGATTTTGATGCCCTGGAAAACTACTGGGAAATCCTCAGACCGTAAGTCTGGCAAAAAGA  
ATTTACTTCAACCGGTGACAATGTCCGCGGTCTGCTGATGAGGGCCGACTTCAAGGATGCCA  
AACAGGTA CTGCGATGATTGAGTACCTCCATCGCTGTAAAGAAATTCATTACAAGCGCGGT  
GAAGACAGATTACTGGATTTTATTGCCGCTCTGCCAGCAATTCAGGCCCCGGGATAAACCT  
CTTGGCCAAAGTTCTTACCCATGGCGTAATGGAAGCTTCCAGCAGGCAGCAGAAAGAACGG  
AGACCCGAATGATCTGGGGATATATAGGTATGAAGGTGCCGGCAAATCAGCTGCCATGTG  
CTATTTTGATCTGCTGCATATTGCCAAAGGGGGCGGGCTGTTACCTTCCCGGGCTTCGAAGT  
GTTTAAACCCCAATATCACTCTCGATGATGGTAATCATCCCCGTCTGGGCAAATCTATAGATAT  
GAAGGAATTTATTTCTCCTTCAGTGATGAGCAAAAGCTTCGCAACGTGTTTGTCTCTATGGA

TGAGATCCAGAACTTTTTTCGGGTCTGATAAATACATGACTATGTATAATAGTCTCATTACCA  
AATACAGCATGCAGCGCCGCAAGCTTAACTTCGGCATCAATTACACCGTCCAGAGTTGGAAC  
TGGATTGATCCACGATTACGTCAATTAACCCACTTCCTGACTGTCTGTAAGGATTTGTCACGA  
ACACCTTGGGGCAAAGAAGCCGGTTTGAAGCGCGGCCAACTGATAGACCTGGTGACCTATG  
ATTGCAAAGGGTTTATTACCGGCGAGGAATGGGCTCCCTTGAAACACTTTAACTTAAATATT  
TTGCCAGTTCGCGATTGGTATGACAGTATTTCGACAGTGGATCCGCTGGAAAGTTTTAGAAA  
ACTGGTTATTA AAAAGCCTGAAGATATTTTGGATATGAGAGAGGGAATGCCACGATTTAATC  
CGCTGGATGATTCCCCTCTTGAGAATGTACCGGATGACGTCCGTGAAATAAGCCAGGAAAAC  
AATGCCCGGATATTATCCAAACTTGAAGAGCAGGTGACCCGGCTACTCTTATTCAGGTGAG  
CAAAGCGCTTAGAAAAGGTTAATGCAAAATGACAACTGACGAAGGGTTATTAGCGGCTGCTC  
AAGCGATTGCAAACGCGTTAGAATCTCTGGGCAATACCCTATCAGCTGCCCTTGACACATCA  
GTTACCACGCTGATGAGTACGGCTTTATCAACCGGATTGGAATTATTCTTACTCTCGATGATT  
ACTGTATTGGCGCTATGGAAACGCCATATTGTACTGGATATTCTGGCAGGGCTCGGGTGGTT  
TGGTATCAGTTTTACCCTCTTCAGCAGCGCTTCACTAATAGCGGTAATGCCATTCGCAACCTG  
TTTGGCTCTTGGGATATTTATGTTTTATCGGATTATTGAAGACACCGGCCGGATAGGCCGATA  
ACGAAGGAGGATGACATGCGTACAAGTAAAAATATGCAGCAAAGAAGCCGATAGTATCCC  
GGCAGTTAAGGTAAGCTGGCGCGAAAGAATGCCTAAATTTAAAGAGTTTATTCCGAAAGAC  
ATCCGAAGGCGTATCGGGATGCGATAGGAGGCCGAATTATGGGTATATTAGGATTCCTTCT  
CAGGGTAGCTCCGGTAAAATCCTTTTCGTATGGGCCACCTAGACAACCAAATAACCAGGTGGC  
CATTAAATGCTGCCCTGCAATCCGTTGATAGCTCAGATTCCAAGAAAATTACCACAGTTGAGA  
TGAAGGATGGCAAATGGACGATTACCACTGACGGTGCTGTTTATAACATCGATACAAACGG  
CCAAACAGCAGATACCGTGCAGTATATAACCAATTATCTGACTAGCCGCGGGGCATCTGCGG  
ATATTATCAAATCAGTTACAGAGCAGATTCCCATTATCACGACACGGGAATCTGGAAACGTC  
GTTAAGAAAAAAACCAGTGCAACTATCACAGATCCTAATGATACCACCAAGAAATACACTG  
CTGAACCTGTAAATGAACCAGCAAATGATTCTACCGGTGAAGGTGATACTCAAACCTAACACC  
GATGTTTCGGTCACAGTGGATAATTCTACGGCATGGACGTTTACTACCCCTAACGGCACAGT  
CTACACCGTGCCCATGGCGGGCTTAGCCTGGTCTGACCCCGCCAAGATGCATGAATATATAA  
CAAACCTCCCTGAACAGTATCGGCGCGCCCGCAAATGTCATTATGGAAGCCGTTAGCCGTATG  
CCCATGTAATGGGGGATACTGGTTTAAAGAGAACCCCGAACTGATGAGTTTGGTAACCTAAT  
AGACAATACTCAAGAGATTAAGGATATTATCGCCGGCAGTGACCAATCTCTAGCTTCTATAA  
CTGCCTTAAAGGCATTCTTAGATGCCAAAGGCTTTTCCAACCTGTCTCCTGAAGAGCAATTC  
AATAAGGCGATTGAGTACGGTTTGATACCGACTGATTCTGTCTATGTACCGCCTGATGCCGG  
TTATAACGTAGGTCAAACGCACCGCCTGGAATGCCTGATGATGTAGCCGTTAGCTTAGGGC  
TGCTGCCGTCTGGTGAACAGATTGAATATAATATCCCAATTTTAACTGGGCGTATATGCCT  
AAGAATGAAGCTGACAAATATTTTGCTGAGCTGAAAGAGATTGTAGGCTACGATGTTACCTC  
GGCTAACCTCAAACAGGCCATAAAAGAGGCAAGAGAGATCATCACTGACCAAATTTTAAAG  
CAATCTAATTTTGAATGGCGTTTAAATAAAGGATATCTCATAAAACTGCCTAACAACGAATA  
TATGGAAACATCTGAATTTAATAAGCTCTCCAGAGTATGCAAGCATATATTAAGACTAATG  
GTATTGAAGCTGCCAAAGCTCGACAAGCATGGGCTGAAAATGTGCTTGATAAATACTCTTCA  
GGCTCGGGAGATGACAAAAATATTAATATTCAATCAGCATTAAACAGCTACGATAAAGACG  
TATATGAAGCATTACAATTCCTTTTCCCGATGTTTGGGATGGCCTTAAACGCAAGCCTGAA  
ATAAGCGGAGCCACTGTGGCCGAATTAGACAAAATTATTAATGCCTCTTGGTTTAGTGAAAG  
CGATAACCAGCAAGAGATTA AAACTTTACTACGTAGAATGGGTTACTGGACTGGGGTTGGC  
GGAAAGCTATCTGATAAATGGAATGAATTATCAGAAGATGATAAGCAAAAAGTCGCTGATA  
ATTACTTAAAAAATATCAACGATCGTTGGTTGCGCGAAATGGGAGATATCCAAGTGACGTTT  
GCCAATGCCATAACTGATATTGTTACTGCAGTAGATGGTATGTGCGCAAAGTGACAAGGAAAT  
CGCGAACTGGCTTGTGTTTTGCCTCCTCTTAATTTTATGAAGCAGTATCTCAAGCCTGAAGC

ATGGGAAAAGATAACCGATTGGTTGAAAAATGCTGGAGATAAAGTAATCCAATCACAAGAG  
AGCTTTAAGGAATGGATAGACAAACAACCAGACGCGACGAAAATACCATTATCAGCAGTAC  
GAGGTATATACGATACTAACTGCAATAGGAGCATCAATACCACTGGCCTTGATGGAAAC  
CGCTACAGGATATGATCCGAAAAATCCTACACCAAGTATTAAGCGCATATTGGATATGGGA  
GCAGGTTTAGTGACGTGGCCAACCTACCCTGCCATATGAAATCGCTCAGGATCCAAAACTGG  
CATCCCCTATACAATGGGATTAGCATTGTCAATTAGTAATCGGTCCAAAGACAATTATCAAAT  
TAGGACAAAGTCTTGGGCGAAAAATATTTATACCAAAGGTTATGAAATCGGTGCAATTCG  
ACTGGATATAGATTTACCGGGTGGCATAGGTCCTGAAAAAATGAGTGAAGTCACTGCACATT  
CATTGCAAAATGTACTGCAAGATATGTTAAGTAAGCTGTCAGATCCTAAAAATAAAGGTGCT  
ATGACAGACCAAATTATTACAGACCCTGTATCAGGAGCCACAATACGTGTTACACCTCTGCA  
AAGAGCGGAAAAAGCTTTGGCAAAAGATGCAGGTAATTGGTCATATAGTGTTGATCTTAATT  
ATCAGTGGTTAGCTGAGCAAATTAAGAAGATGGGAAAGCCATTGCTGATGTGCCGAATAG  
GGGTGATTGGGGAGCTGGCGTATATAGCTCTGATTCTGCATGGTTAACTAGATTAGAGACAG  
CTCAGGATAAAAGTGCAGGCGTATATAAACCTGCCATTGTTGCCATTAATATAATGAGCTT  
AAAAAAGTCCCCAAAGAGGTTTCAGGAACTTTTTGAGCAAGGTAATTTGACGAGGCAAGAG  
CTCTCTTTGCTGAAATGGAACGTGCTGGAAAGATTGAACCTGGTGCTTATGAAATGTGGAAG  
CACTGGGTCGATAAAAAATGGACGTTTAATCATGGAAAGAGAAATATACTTTGCAAAAGGTA  
CTGAGTTTTTACCTATCCAGCCTACATTTTGAATCGCACTAAGGCAGTTGGAGATTTAACTG  
CGTCAAACCTTCACTTGGGCGGATCGGGATTTGAAGCGTCCGGATGTCAATGGTAAGGAGACC  
GTGGTTGTTAAAAAGGGTGAACGTGTCCCAATTATCTGGATAGCCGCAAAGGGAGCAAAC  
GTTACAGTCTCTCGTTTAGCTGTTCCGCAATTATCATCATTGTTTATCAACCGTATACTACCTT  
ACGACGTATGGGGAGAGTACCCAAGGGCAAGGTATCTCTGCAATTAGGTTATGGGGATGTG  
CAGTTACCGGAATTACCAGGCATCGAATATAAACACCGTAATACTGGATATGATTATTTGGC  
TAATAATGAACATCCCTCAGTAACTAGCCTTGAAATAAAACAAATAGGTGGCAAAGGAGAC  
TGGGGAACACTGTAATAGGAGATTTGCATGGTGACTATACAGATCTCCTGAAAGATATAAA  
TTCTGGTTATGAGAGACCTCTTATTCGTGGCAGAGATGGAAATATTACCAACTGGAAATGGA  
ATGGAGAAAAACAATCGGTAGTGCAAGTTGGCGATATTGTTGACCGGGGTGCCCACTATGA  
TCAAATTAGAACAACTTTTAATCGTTTGGCAGATGAAGCCGCTCAAACCTGGCGGTCTGTTG  
AACGTTTAATAGGGAATCATGAGTTAGCGTATCTAACCGGGGAAAAAATACATGGTATAGA  
TTATTCAAATGCTGCTGCTATTA AAAAGGGTATTCTCGAGGATATCAATGCAGGAAAAC TCA  
AGGCCGCGGAAGCGATAAATGGGGAAC TATACACTCATGCCGGCGTTAGTTTGGAGAAATT  
TCCAGAATGGAAAGGAAAGGATGCAGCCTATATTGCTGCTGAAATAAATAGACGTTTCAAC  
AAAGCTCTGGCACAAAATAAGTGGACAGATCGTATATTCGATAAAGGGTCAGGAGAACGCG  
GATACAAAGGCATAGGAGGTCCATTCTGGTTACGTACAAAAGAAACATCAGCTGAAGCTCT  
TAATCTTGGTTATAAACAATATTTTGGTCACACTCCAAGACCGTCAGGTATTAATGAGGAAG  
CTCCTAATGCGATAAATGTCGATATAGGCCGCAATGGACAGAATCATGGGCTGGTAAAATC  
GGTGCTTATCAACGTACTCCTAAACTAGAAACAGTTGAACGTGGTACTAATCTAATAGAATC  
TTTAGGCGAATCTCCAGTTCATGGAACGGGTTTTATGCCAGTACAATTTAGTCTAGATATCCC  
AACTATTGAAGAGGGTGCTATTAGCCAAACAATTAAGTCACTATCACGGCATGATCGCGGGC  
AAATAGATTGGTTGAGACCTGAAGATATAAAAGCCACAATGGAGCCGCCAACAAATCTTAC  
CCCCAATCAAATAGGTGCTGCCAACAGATTAATAAAATCTGTGTGGGATCAAACCGGTATG  
GTAGACATGCAATTCAAAGGGGTTATCGGTATTTCAAAGATGGGATGCCAGCTTATAATCG  
ACAAAATATTTTATGGCAAGGTGAGGCTAGCCTGCTCAATAGCAATCCTAAGAATCCAGCAT  
ATATCGCAATGCCTCTAGTTAGTAAATCACAGAAATTGTTTGAAAACCAACGAGAGATAGAT  
GCAGGTCTTAAACGGCTGGGTATAAATGCAAATTATGCCGAATTTAGACCGGCTATTATTCT  
TGGTAAATTTAAACCTAAAATTTCCATGAAAGATCGCATGGGATACATGGAAAAAGTCATG  
AAAAATCAACCTAGAAGTGCAGTAATGATCCGGGCGGAAAAAGTGAATTACTAAAAGCAA

AACCCGGAAAGAATAGCAAAAAATCCAATAAGACCAATAATAAAAATTGATGAGAATTATGA  
TGAAAATCGTTATGAAGGTAGCGAAAACAGTAAAGAGTATACAAAACCTCGAGTTAGGTCCT  
AAACCCGGATATAAACCTCAAGATTATGAAGATTACAGTAAAGAATATCCAGCGAATAAAC  
TTTATTACCCTATCCATGAGAGCAAGTATGCTAGCGCGACTGAAGAAAGCCATGAGCCCGAC  
TATACTGCGAGCGAACAGCTTCCTACATACTCATCTCCTAAATATTCACCACTGGGTATAAT  
CCTAAAAATTACGAGGGTAAGGATAGTCCAATAGAACTATACCTCCTCCAGTTATACCTAC  
AGATGATAACCAGATTACCAAGAGACAAGATTCTAAAGCTACATCTAAACAAGATCGCCCT  
AAACTGGGAAATGGGGATGTAGCATGGAAACAAGGCGAACTGGGTACTGGTGAAAATAAG  
CGACCAGTATGGTATATACAACGTGCTGACGGTGATGTTGACATAGTATTTCAACCGCCTGA  
AGATGCGCCAAGGCTTGAGGGCACTCCTGCAGAGACCTTCTTTACTCGTGGTAAAAAACCAC  
CTACCAACCTGACTCAGAAAATGGGAGTCACTACTGCTAAAATAAACCTGCAGGATAATCCT  
GAAATTAATTCATTCAGACCAAGTCACCAAAATTTAAACAATCTATACCGAGGCATATCAG  
GCGCTCAATTGGCATGTGACAAAGTGTACAAAATATTCAGATATAAGAAGAGGCCGAGT  
GTTTTACTCGGCCTCTTTCTACTTCCTATTTTCCGCTTCATCTATTTCCGGTCTTTTAGTGCGG  
ATGTATCAGGAATTTTAAATATCTGGCTTACATCATGCTGAGCCACTTCATAACCCGTATAG  
AACATATTGGCGATATTTGCAATTCAGACATGGTAGTGCTCGGGCTTAAATTTCCGGTTTTCT  
ATATAATTATAAACTGATAAATGAAATCTTTAGTAGCATTAGCCGCTAACCATTCCTGAGG  
TGATTTTGCAAAACCCTGCATAAGTGTTGAGATATCCCTATGTCCTCTAAAAGATATGGTA  
AATATTCGCTTTAACTGGATCTTCTGGGGCATATGGGAGTACTACTTCTTTCCCTGTTGAA  
TAACCATATCTTTACTCCTATTAATCCTATTGTTTCCTACAATATACTATGATGATACTAG  
GAAGTCAATAGGATTATTGCGCATTAGCTAATTAAGTTATATGATATTGCTATGATAAAAAC  
ATTAAGAGATCATCGATTAGATAAATTCTGGAGCCAAGCTGAACTAGCGAAACAAGCAGGT  
ATTGGAGCGGATACAGTTAACAGACTTGAAAATGGTAAGCAAAATCCTAGTTTTATTACTAT  
CCGTAAGCTAGCTAAAGCTCTCAATGTAAAACCAGAGGATATTGAATTTTAAAACGTACTTT  
TGGAGTGTGTGTTATGTGGGATTCATTGTTGGCAATCAAATCCGCCGCTGCAATCGTAACC  
TCCTTGTTACTATAATACTAATAGCCTTAATTTTTATCGCAATAGCTTCTTTCTCATACTGA  
CCCGGCAGTAACCTGGATAATACTTGGAGCGGGAATTGTTATTTTGCTATATCCAATCATCT  
GTTATCTACGACAAATTAATTCTTTTTCAAATCACCCAGTTATGAAAACCTTGCGCAAGTATG  
ATGACTTGCTGAGTTGCTTCATGCAATAGATGAGGAAGTTAAATCAGAATCATCCATAAAA  
TCCAGTAGCAAATACTTAACTCCAACTGGGCTATATGTCTTACAATGTATGGCATAAAA  
GATTGTAATTTAACCGAATTAGTTTGGGTTTACCCCAAAAAAACTACCCACACGGTTAACT  
TTATCCTTCCATTGTACTCGTCTAATTCTCTTTGTATATGTGCTACCCCAATTGAATCAAGGA  
ATTCTAATGGGAATATGAAGAATTCAATTTACCCTACGCAAATAGAAATTGACGTTACTAAA  
GAACAATGCAACGAATATATGCAATCTCTACAATCTTACGCGCCATGGGTTCTATATGGTTA  
CGCAGACGATATTGAAAGCTGCTGGAAGAAACAGCCGCTAGCATTATTACAGGCAGTTTTA  
AATCGTAAAGAAGAATTATCTAAAGTAGAATAAATATTAATAAATTTTGAAGGTTGTTTCG  
AATGGTAAATAATATATGGCAAAAATAAGATGGAATGGTTTTTATTCATAAGCAAAGTACCCT  
GAACGGTACGAGTAAGCTTGTAACAAGGAAATTTAAGGTTTGTCCGGTATGTTTAAAGTACCT  
ATTTTGAAGCATCATATCAACCTGGTTTTTCATCCACTGGCTAGATATTATTGCAAAAAACATC  
GAGGGTTCTTTTTTATGCCCAAGACGCAAACAGAAGTTATTCGCAAATAATTTTACGAAGAT  
CACTTGGGTACAAAGACAGAATGCCTAGGTAGGAGGAATATTCTTATAACAAAATGATATA  
ATTTACGTACATGTAGTTCAATTAAGAGTGCTTTAGGGAGAGATAGTTACAATGAATGAAA  
GTAATCAATTAGAACCGATACCAGAAGGCGAAATCCAATATCTCTATTTAAAAACAAAGA  
GATCCGAAGAGTATTGCATGACGGCGAATGGTTTTTCTCCGTGGTGGATATAATAGAAGCTA  
TAACAGATTCTATCAGGCCACGACAATATTGGACTGACCTTAAATCTAAGATAATCAAAGAA  
GGCGCAAATGAACTGTACGAAAATATCGTACAGTTAAAAATGCCTGCTTCAGATGGTAAAG  
AGCGAGATACGGACGCAGCAGATGCAGAAACAGTCTTCCGAATTATACAATCTATCCCTTCA

CCAAAAGCAGAGCCCTTTAAGAGATGGCTAGCTAAAACAGCGTATGATCGTATTGAAGAAT  
TCCAAAATCCTGAGATAGCCATCAAACGAGCTATACTTGATTACCAAATACAAGGCAGAAC  
AGATGAATGGATAAAGGCGCGCATTCTGAACCTGACTAGCCGTAATTAAGTACGAA  
TGGCAAAAACGAGGCATAGCAGGTGCGGAGTACGGCATTCTACTAATGTAATATCAAAG  
AGACTTTTGATATAGATACAACAGAACACAAGGAAATCAAGGGGCTTGCAAAAAGACATAA  
CCTCAGAGATCATATGACTGATATGGAACCTTATCTTAACGATGCTTGGGGAAACATCAACAG  
CCGAACCTTGCAGATCGAGGGATGCTAAGGGTTTTCAAGAAAATGAGCAGGCAGCTCATGC  
AGGTGGGAGAATTGCAGGAGACACAAGAAGGAATTTGAAAAGCAATTAGGGGAATCGGT  
CGTCTCTAAAAACAATTTCTTGCCCAAACATCCCGATCAGCCAAAATTAGAGGAAGGATAAT  
TATACATACCCAAGGCCAAAATATTTTTATAGCTTCAGGTTATCAACCCGACTAACTTCTTAT  
GCCCTTGAACAGCTACCTCAGAATTCAAACCTGGCAGCGTATTTTCTAGTTTTCGTCAGAGTG  
CTATGCCCCATAAGAGATTGAACTTCAAACCTCCCTGCCCATTCGTAAGCACATAGTAGC  
GAAGGTGTGCCTGAATGTATGAGGGCTGCACCGGATATTTGTAATCCCTGCCCGCTTCCCTA  
ATACGACGATTGTCTGCATGATGCCATTTTTAGTTAAAGGGTGGCACTCTTTATCACTATAGC  
GAGTCTTGTGACGGCTAACCCAAACATCAGGGGTTTTATCTCCGGGAATGACTGGATTTTA  
AGATACTGATATTCCAGTAATGCCCTCTGAACTTTAGGGCCTATGCGTACAATCCTCT

>Dmc\_IME1-15

AAAATTTAAGAGAAACATTGGAAAATCCAAATTCTGGACTAAGCAAAAAGTTCAAAAACCTT  
CACAAAGAAGTTCATGGTTCGAACATGGCCTTTACGGTGAATTGTATAAAGATAGAATCGAG  
GAATTGAGAAATGCGGAAAGACCCGAAGGGCAACCCGAAAAGACTGGCGAGTGATGGTGG  
CGCTTTGACTGCAATCACTGGCGCATAATAGCGGTGCGATGCCATCGCGAGACAGGCGCAC  
ATGGCTCTGCCATGTGCAAGCAGGACGCAGGAAATCGCACACAGGGCGTTGCCATGCGTCAC  
CGAAGACCGACCGTTCGGTGGGGCGGAAGGGCGGTTCGTCCTCCCCGTACCCCTCCTTCTT  
TACTTGTCCATAACAACGTTAATGTCAACGCTCAGCTTTATAGAGCTAAGGGTTTACTTACAT  
ACTGGGATTTTCATGTTACACAAAGTACGTGTTGGTAACACCATTGTTGTACTTCAGAATAAG  
TCAGACCATAACAGCTTAACTTATGCCCTCAACTGCTCAAAGCAGATACTTTCAAGACGG  
ACGCTTGAACATTTTCGAGAAAAATAAAAAGACGCTTGGGTAAGTTTAATAACGTAAAAGGG  
TTAATGGAACTTTGACCTATGATCCCAAAAAGATTTCTAAACAAGAAGCATGGGCATCATT  
TAGCAAAGACACTCGTAAATTTCTGAATGGTCTCAACCAATATCGAAAACGGCGTGGCTGGC  
CAAGACTCCACTATCTTTGGGTAGTCGAGGTTCAAAAAGAAACGGGCTATCCGCATGTACAT  
ATCTTCTTCCCGAACCTGAAATGGCTTGCACCCCTTTCAATTATCAACGGCAATTGGAATAA  
GGGACGAGCAAATATTGAAAGCCCGAAAGCCATAACAACAACTGTGCCGTTATATCAGC  
AAGTACTTAAGAAAAATGAATGGCTGGAGTGATTTACATCTGGCCTTACTTTGGAGTGGTAA  
AATGCCGTATGTATGGGTTTTCCAGAGGTTTTTCCCCCAAAGTTGAGAAAAAGGAAACCGAG  
TGGCAAAAACATGCGGTCTTACAACTAATGACCGAGATATGCTTGAAAAATCACTTGAAG  
AAGGTGGTTATAAAAATTGATAGAAGATTTGTGAATACGAAAGGACAGAAGTACTAGCGTGAAAA  
CCATGAACACAGTAAACCCCGATACTTTTTCTCCTGATTTATTAACGGCAAGCGTCTTTGTC  
TTAGCGTGCCAGAAGCAGCTAAGATGTTAGGATTGTCAAAGAATTTTACTTATGAACTGGTT  
AGACAAGGCGCTATCCCTTCTATAAAAATTAGGTAAGCGCATACTGATTTCCCGCATGCAATT  
AGAAGAAATTCTAAAACGGGGTAACGAATGAAAGGCCATATCGTAAAACGCAGTACGGACA  
GCTGGTCAATTGTAATTGAACTGCCACGCGATCCAGCTACTGGTAAACGCAGACAATCTTGG  
CATACGATAAAAAGGAACGAAAAAAGAAGCCGATAAAAAACTGCGTGAACCTTCTTACTGCGC  
AAGATAACGGTATATTTGTAAAAACAGAGTAAATTATCATTTGGCGAATGGCTTGAAAACTGG  
TGTAAGAGATTACGTTAAGATCCAACTACCCAAAGAACATTTGAAAGTTACTATCAAACAT  
AATCGGGCATATTGAACCTGCACTAGGCAAGGTTATACTGACTGAACTTACTCCCCAGATTA  
TCCAAGCTTATTATGCAAGGCAATTAGAAAAAGGCCGTGCAGATGGTAAAGGTGGCCTCTCT

GCTCGAAGTGTGCTTTACCAGCATCGGATAATAAGTAAATGCCTTAAACAGGCAACCAA  
TGGCTTAATTATGAGAAATCCAGCTGATGCAGTTGAACCACCCAGACCCCGAAAGACTGCA  
ATATCTGTTCCAGATAAAGATGAATTACCCAGACTCCTAGATGCTTTTGAACAACCCCTA  
TTACGTTTTTTATTGCCTGCTTCTTTATTGTGGCATGCGCCGAGGCGAAGCTTTAGCATTACG  
CTGGAAGGATATAGATTTAAAACAAGACACAATTCAAATAGCCGAGACAGCTTTTACCTTAA  
GATCCGGTGAATACGTCATAAAAAGAACCCAAAACGCCTCACAGTCGAAGATGCATAGACAT  
ACCACCCACAATGAAGCTTCTTCTGCTCGAATACAAAGCAGACCAGACGGCATATTATGCAA  
AACTAGGGGTAGAACTTGGCTTACATGACTTCGTCTTTACTCGGCCTAATGGAGAGCCTTTA  
AATCCAAATACAGTTACTCACACTTTCCTGAAAGCAGTCCGAAAGGCAGGCTTTGATAAGCT  
TCGTCTGCATGACCTGCGTCACTTACATGCTACGCTTATGCTTCAGGCAGGTATACACCCTAA  
GATTGTTTCCGAAAGGCTTGGGCATGCCAGTATCAATATTACTTTAGATACATATAGCCATG  
TAATGCCTGGGCTTCAGAAAAGGCTGTAAATGTTTTTGATAAGATGCTGTCAGCTAACGAA  
GAATCGCTTGAAGAAAATTCGGTTAGCAAACGGTTAGCAAACACGAGGGAGTAAGTGGTA  
GGCCGTACAGGTCTCGAACCTGTGACCCTCTGATTA AAAAGTCAAAGCTAAAAAACCAGGC  
GGAGCCACTCTCCTTTGCATTATGTTATGTATATTAGAATCTTTTGATAGAAGCAATAACTCT  
TCCCAATATATCAGCGTTAGTCATAACTAAATCTTTATAATCTCCATTTGAGGACCGCAGAAT  
AATCTGTCCATTATTCAAATATAGATGTTTTGCAGTCACTTCATTATGCGCTGTACGAACGGC  
ATAAATTTTACCTTCAAACATCTCTGAATCTTTATCAACAATGATTATATCGCCGTTTTCAAT  
CCCATCCCCTTTGAGGCTCTCACCGCTCACTCTCAACGCATACACTCTCTTACTCGCATTTTTT  
AATAATTCCTTTGGGACAGGAACATAATCAGATGCTGCCTCTTCATCTACTAATTCCGGATAT  
CCTGCGGGTATATAACCAATTACTGGGATGAATTC AATATCATCCATTCTTCTGGATATTGCT  
TGTGCGCGGCTTAATAAATTACCAAGAGATTCTTCTTTCTCACCCAATAATGCTGATGTCGAA  
ATATCAAGTCCACGCGCTAACTTCTGCGCAATTCCAAGTGTAGCACTATATGTTTTCCCGCTT  
TCCAATTGGGATATGTAGGCACGATCTACACCTGATCTCCGGGCTAATCACTCTGCGTCAT  
ACCTATTTTTTTGCGTAACTCTTTGAGCGTTATACCTATTGATGACTTATCTTCCATAGCACCT  
ATTTTCACTTGCCTGTTGAATATTTACAAGTTGTAGATATATTTAACAAAAGTGTCAATTATA  
TATTGACTTAAGTCAATGGTAGTGGTATCCTCATGTAGAAATGAGCAACAAAATAGTTGATA  
TTATCAAACAATACCTTGGCAAAAACAGCATCTCGGGAAACCAATTTTCCCGGACAATAGGA  
TTTGACCCAGCAATATGGTGCAGAATTAAGCACAAAAAATGCAACCCCTCACCTGCATTTTT  
GACAAGTGTGCTCGACTTATCCGGAAGTGCCTTCCAAATTCAAGAGTCGATGTTTTGGTA  
CAGAGGAGAACGATGGAAACTAATAAATCAGAAATAGA ACTATATCCCATGACTCCATCTC  
AAATTCGGCAACGTAAAAATGCCGGAGCACTCGGAGGTCAAGCTATTCTGGAACGATACGG  
AGTCGAGTGGTTACAGAAAATCGGTAAGCTTGGTGGGAGACCTAGATTAGCAAATATTGAA  
CTATTAAGACAGCAAAAAGCCCTTAAGGCTGCTAATAAAGAAAATCAGATAGGAGGAATGG  
ACAGCCGCCGGTCTGAAAACCTGGGGCAACTTAAACGGCTTATAAGGCTGAAATACTTTGG  
GGCGAAGTGTGAGCTTCGTCCAGAAAGGGGAATGAGGCAATGCCTCAACAACAAGTGGCT  
TATCGTATCAAGAATGAACGCACCGGTCAATGGTGGGAGGGAAAGGCTGATAGCCCGATAG  
ATGCCATGCGGAAAGCCGGCAATGAATTC CCGGT CAGAAACCCTAAGTTCGGCTATTTCCAT  
TTAACTAGTCTGAAATGAGGTCCAATATGACAACAGCAACACGTAAATATACGATAGACGA  
TATACTGGCCAAACTCCAGGGCGTCAAAAAGAACGGCTCCGGCTGGATGGCCTGCTGCCCTG  
CGCATGCCGATAAAAACCCGTCACTATCAGTATGCGAAAAGAGTGGCAAGATTTTGATCAA  
ATGCTTTGCCGGATGTAGCTATGAGACGATCATGTCCGCGTTGGATATGCCTGTTAATGATG  
CAATGCCCAAAACTGCCAAGTCATCCAAGAAAAATTCACCGCTGGGTTCGGATAGTTATGGC  
ATACCCGTATGAGCAAAAAGACGGATCCATATACTACGAGCATGTACGCTACCAGCCAAAA  
ACCTTCAGATTTAGACGCCCGGATCAGAACGGGTACTACATCAATAATATGGATGGGATAG  
ACCATATTTTGTACCGGCTGCCTAATCTGGTACGCGGGATAGCTGAAGGTAAATCAGTCTAC  
ATTGCTGAAGGTGAAAAGGACGTTGATAACATACGAGGCTTAACTTGGTTCGCAACGTGTA

ATGATTGTGGCGCCGGCAAGTGGGAAGACAAATATTCTGATGAATTA AAAAGGTGCGCCTCA  
AGTGATCATTATCGCCGATAAAGACGAACCCGGCCGAAACATGCCTCCGAGGTCGCCCTAT  
CCGTACATAACAGAGGGCGTACCGGTA AAAATTATAGAGATGCCGGGTGAATTCAGAAGAC  
TGAGGACGGCTATACAGGGGTAAAGGACTTTTCCGACTGGCTGAATGCCGGCGGAACTGCCT  
CCCAGCTGGAAAACTGGTAGCCGAGGCACCGGTCTATGTACCGCCGCTAATACAGGACTC  
CCTCCGTGAGATATCCGGAGAGCGGTATTGTGTGGAAAACGGCAGGGTCTGTCTAATAAAA  
GGCGGCAGAGATGGATCGCTGACTCTCCCCCTGTGTAATTTTACAGCCAGGGTAACAGAAGA  
AATAACCAGAGACAACGGGGTAGAAGTATCCAAGTTTTTCCGGATACTTGGCCATGATTACG  
CCGTAATAATCTGCCCGCTATTGAGGTGTCTGCATCATCTTCCCTGGATTAACTGGGTAG  
TATCAGAATGGGGAATGCGGGCCATCATAGGCGCCGGTCAGAGCGTTAAAGACTGCCTCAG  
AGAGGCTATGCAGCTGCTCTCCAAAACGCCCAATCCCGTCATATATATACCCATACCGGCT  
GGCGTCATATTAACGGGCAAGATATATTCTCTCCAGGGCGGGGCTATAGGCTGTGATGGA  
GTGGATGTAGACCTGGAACCCAGCTGCAGAGGTATTCTCTGGGCACACCGGACCCGGAGA  
AATTAAGGGAATCTGTCCGGGCCAGCCTGAACTTTCTCTATATCGCTGACTTGTCCGTTACCC  
TGCCGCTTTGGACAACGATGTATCTGTCTCCGCTGGCCGAAGCCCTTGAACCGGCTTTTACCT  
TATGGCTGGTGGCTGTGTCCGGCAGTTATAAATCAACTCTGTCTGCGTTGGCACTCTGCCATT  
TCGGAGATTTTGACAATAACCATCTGCCGGCGTCTTGGCGGGATACCGGTAACCAGCTGGAA  
AACTGTTGTTACCGCTAAGGACCTGCCGCTGGTTATAGATGACTGGGCACCTGGTCAGGA  
TAACAATAAGAAACGCGAGTTGGAAGCTAAAGCTGAGCATATCATTCTGTGCCAGGGCAAT  
CACCAGGGGCGCGGCCGGATGCGCTCAGACACAACCTCACGCCTGAGTTATTATCCCCGCGG  
TATGTTGGTTACATCAGGTGAGCATAACCCCTCCGGCCATTCCCATACCGCCCGTATTATCAG  
CGTGCGGTTGGAAAAGGAAATGGTTGACCTCGGCTTAATGACCGAGGCTCAGACTAAGGAC  
CGCCACCTATACCGCCAGGCCATGGCCA ACTATATCGCCTGGTTACAACCGAACTGGCTTGA  
GCGCAAATGTGAACTCCGGCAGAAATTTACCCAGCTGCGGGCTGAGATTACCAATGAATTA  
AGCGACTGCAAAATACATTCCCGCCTGCCGGATGTAGTAGCCATCCTTCTGATTGCGCTGTC  
TACCGCTTTAGAGTTTGCTAAATCTACTGGAGAGCTTAAGGCAGACGAATACGATTTATTCA  
TGAATGAGGGCCGCGTTATTTTCATGGACATGGCCAAGGAGCAGGGCGAAATGGTTGAGGA  
ACAACGCCCAGGTCAGAGAGCTATTGAGGCTATCCAGGCATCGCTGCGTATCGGTACGGCA  
GTATTACGCAATAAAAATGATGCCGCGCTGACTGAGTTGCCATCAGGTAAGACCGCTATCGG  
CTGGCGGGATTATATGAACGGGCATACCCTGCTGGATCCGGCCGCCACTTACCAGGTAATAG  
TCCAGCACTGCGCAAAGTCCAACAATCCATATACCATCAACGAGCTGGAAACATGGCGGGA  
TTTAAACCGCATGGGATTTACTGAGGCCTCCAATGACGGCAGGCCTACGGTCATGGCCAGAG  
TAACGGCTATCCCGAAGTCATTCCGGGTAGTCAAGGTTAAAATGAGGCTATCGGATTGGCT  
AAAACAACATCCCTGCCGCTGGAAGGCATGGAAAATGTGTAATATTTTTTACCGGCGGGG  
GGTATATCAAATTTTGGAAACATGGAAACAACCACTTTTTCCAATCGTGGCTTACGTTGT  
TTCCAAGACCTGGAAACAAGCCCTAAATTTTGGAAACATTGGAAACAGACATAATGTTAGCT  
GGAAACATTTTGGTAACACGATTGATATACGAACAAATAAACTACTTAACAATAATAAAAT  
GGAAACATTTTGGAAACAACGTA ACTTAGCTTTGAGATTCTTTTATTGTTTCCATGTTTCCAA  
AAGAATAGGAGTTAGCTGACATGAAGATTGTTAAATCATTCTCAAAGGGCTCGGATAAATG  
AAAGTCGCGTTATATGCCAGGGTAAGCACTCGGGATAAAAATCAGGATCCGGAAGTCCAAC  
TGATGGAGCTGCGGAAATATTGCCAGGAAAACGGCATGGAAATAACCAGGGAATATATAGA  
TCATGCCCTCGGCCAATGATTTCTGTCGAGGACGGCATGGAAACAGTTGTTAGTGGATGCAT  
CTGCCCGAAAGTTTCCGGGGTACTGGTGTGGAACCTTGACCGGGCATTCCGCGACATTACG  
GTGGCCACCTCGTCCGTTAAAATGCTGCGCAATGCCGGCATAGATTTTATTGTTACCACTGTC  
CCTGTTCTTTTCAGTCCAAGGTCCAGCTGGAGACCTGATGTTTAAACATCTATGCCGCTTTTGGC  
CAGTTTGAAAAGGACACCATTATTGAAAGAGTTAACGCCGGACTTTCAAGAGCAAAGGCTA  
AGGGTAAGGCATTCCGTGCGCCAAGAAAGGCAATAGACTTCAATAAGGTTTTTGGAAAGCCA



CGAGATAGCCTGCTCACGGGTAAACCGGATTACTAAAGAAAATCAGGGTTATTCCGAGACG  
GCGAGGATATTGAGCGAGCAGACCGGGCTAAGAATTACAGCCGGTTGGGTCTATAACCGGA  
TAAAGGCCGCAATTAATGCTTCAAAAAACCCACCCCATTTTTGCATAAATTTAAAGC  
CAAAAATCTTATCGGATGGGAGGCTTCAAAAAACAAATGATTTTTGAAGGAATAGTTGAGG  
TGACGGCATGACAGCCAAAGGGTTCAAAATAGAAGCCTGCGGAATGGGGTTAATAATACC  
GGTTATCCCGGAGCATTACACCTGTGGTTGTAAGCATAATCAAATCCCTCATTAGCGGTAA  
TATCCTGCACTTATTCTCTGGCTCCAGCACGATAGGAAGTGAGCGAGTAGATATTGCACATC  
AAAATGCTACGGCAAATTGTACTGTTGAGGAATTTATTGCACAGGATAAACGTCCTACTGGGAT  
TGGGTTATTCTTGACCCCTTACCAAATTACACGCACTGATGCAAAGCTAAATGGGTATGG  
AATAAAGGGGGCCGTTTCGTCTTGTGTCCAAAAGAGGGCGTCCGTTAATTAGCTGGTTGCGTC  
AACATGCTGATAACGTAATATGGCTAGACCAGTGTGCGCAATAATTAAGGATTTAAGCG  
AGAAAAATTATGGTTATTGTTGCCTGGTGGATTTCAATCAGTGCGTGTACTGACGTGGCTTAG  
CCGTAACCAAATAGAGCTGCCATTAGTAACCAGCAACAGGCAATAGGAGTGTAAGAGATGA  
CAGCAATTAAGAGCTCCTTTGTAAAGAGATAAGACATCAAAATTCACAATTGTAAAAAAT  
GATGGCCTATCTTAATAAAAAATTGTGCTAAGGGAAAGGAAAGAAAATCAATGAAAACCTGTT  
TTAACTAAAATCAAAGGTATCACCCATTATTGATGCACAGATTCCCGATGGCGGGGGCAGA  
CGATACGTCAAAAAGACGCACCGGCGTACCAGATTGGAAGGCAGAGGCTGAACTATCGTTA  
TACAAGGATGATCATGGACAAATTTATCAGCCAGCGAGCCATATTGAAGCCTCGCTTAAAGA  
GGCCAGTAAAACACTAAAAATACCAGGCAAACGAGGGGCAACCTATTCAAAACTCATTGGT  
TCCGCTGTCTCTGTTTCCCCTGATGCTATCACTCATTGATACAGAATTATGAAACCGATAGT  
CGTCCTGTTGTCATACAGAAAGCACGGATAGTACGTTACAGACCAATATTTAAGGAGTGGGA  
ATTAGAATTTGAAATCAATATTGGAGATGAACAAATTCCTATTGAGGTTGTTAAACAGGCCT  
TAGATCATGCCGACTATACGTAGGGATAGGTGATTTTCGCCCAGGACGTGGGGGTAAATTC  
GGTAAATTCATAGTTACAAAATTTATTGAGCAATAATGCAGCATAACAGGGTAGGGCGGGC  
ATGGTCTGGTAAGGCACGGTGGGGCTAGGACGGACCGGGCGGGGAGGGGTAAAGGCAGGGC  
AGGGTAAGGTTTTAAAAAGTGAGGAGATGATAAAAATGAGACATCTTAAAGCAGTCTGGCC  
GGATGGTTCTTTTATTGAAGGCATTCGTCCCAAGAATAGACTATTCGAGAGCCCCGGCACGC  
ATCATTAAATAGTTACCGAAACGAATCTTGATAAACAAAATTTAATAGGTAAGCGAGTCCGT  
ATCCGATTTGCGGACCTCAGTATTGGGTGGTTATGGAATAAACACAAAAAAGAGGAGTGA  
ACAGCATGGAAAAAGCAATTGTAAATTGTCCTAAGGTCGTAACGTTCCGGCCAGATACGGTC  
ATTTAAATCCAAGCAGATTATAGAAGAAGGTGAACCGGTCTGGCTGGATATAGAGTTCGAG  
GCATTTTTAGAGCAGTATGAACTAAAACCTGCTGCTGGATATCAATAAAATGAGATATCCGAT  
TGATTTATAGCGGTTTCATTTGCTGGAACGGATGAAAATACCCCTCACAGAGTAGTTACGT  
TTGAAGAGATAGACGACGTTTACAGATGAAACCATCTGTAAACGTACCTGGGCGTGGGCAGAA  
TAATCCAGGCTCGATGCTAAGTGCTTAATCCATGGAAATATTAAGCCAATCATGCGGGTAT  
CGTTTAGCGCAAACGTGCCCCGAGAACTATCAGGAACCCCGAATCGCTTCATCAACCATGGGA  
GTAAAAACAATCATATTCAACTTTATGGGGACTAAATAGAGAGGTGAATTTATGAGCAGGA  
CAGGTGTTGTTGAACGGGGAGAGGATGATTTAACCTACGAATGCTTCAGAATGAACTGGAT  
ATCTGCGCCGAGGAAATGGGAAGCGCTGGCTGTGAAGGGTGTTCATGCCAGCGCCTCTGTG  
ACCGTTTATGGGCGTCAATAAAGCCCGCCAGAGATAATATGCTGTCAGTGGATGAGTATTTT  
GATTACAGCCGGAAGTTTAAAGAGCTTCGGGGCGGCAAGATACTGCCGCCAGTATTTGCCGTT  
GATTATCGCCTGAATGACAGGATTACGCCTAAAACAGTACCGGCTGATATAGGCCAGAGTA  
AAAACCACTTGATTACAGACCATCCGCCATCCAGAAATGAATAATCCCATGCTACCAGTTTC  
GGTAAAGCGTGGGTGAAAAACCCGATTAACCCTTTGTGAAATTCGCAATTGTAATGCCAAT  
ATTGGCCATCGTGCTATCGGTATAACTCATTACCTGGAACCCAGTAAGGCATTAATAAAAT  
TCTGCTCGGCAGTACCTATCCAAACACCGTCAAGTATCAGACACATAGCATTGCCGATTACG  
AAGGCAAATACTACCATAACCAGCCATTGAGGACGCATCAGAGACTCACCGTCTTTCTGTTT

ACCAGTTCAGTAGCCGCTACGACTACAAATGGCAGGACTGTCCATAAATCAGCTCCCAAAGC  
GGCAGACAAGAACCCTGTCCAGATACCACCTGCGATGATACATGGCAATAATTTACGGGTTA  
CTCCGAACGATATCATGGTAATAGCAGCTCCGCCGCCGAATATAAACGGATACCAGACAAA  
TTCAAGCGGGATACCTGCTTCGGATATAATCTCATTTATAGGGGACAGGAATTCAAGCCGGT  
CAGGATCCAGCGCTCCGAAAAATCCGGCAGGCGTATCAGAAATTTTCATCATCATCTATAATC  
TGAATACCTTTGTTCATCTCCAGAACTACTAATGCGCTCAAATTGTAGGCGTTGTAGCTGATT  
ATAGCTGCCGAGACATCCGCATCGGTGGTTGTTGTCCGGAATGAGGGCGTGGCATCATTACT  
ATTCCCGGATAGATCCGTAAATGTAGTGGCGTATTGCCATTCCCACGAGCCTTTTAATAACCC  
ACCAATCGTTATTTTAGCGTAGTACAGGTAAGGCATGGATCCGTTAGCCCCGATAACCCAGT  
TATTGGCATTATCAGTAATAGAGCCAGCATAAGCGGCAGAATCAGCCAATATATTGTCAACG  
TATAAAGAAAATGTTCCCCCGGATAAAACAGTTTTTACTGTATGGTCGCTAGATATTATTCC  
GGTAGCTGTTAGTGTTACAGCAGGAGTATAGCCACCTACAACAAAATAATAATCATAACTGT  
CTGCTGACCAAGTTACGCCGCTGTCCGATGACGAACACTTAGTTCCACTGGCATAAGCATCC  
GAATTTTCTGACCACACCTTAATATAATTAGAAGCGTCTCCAGTCGGGCAAGAGAAAAGCCAA  
GGCATAAGAAGTTCCGGAACCTAATTTTGTGACTGACTTAAGTAAAATGTTTGGGCGCCAG  
CTGACCCACTGATAGTAGATGCGCTAATTGATCCAGTTGCAAGCGCAGTACCAGTTGGCACT  
CCTCCAGATACGGCGTAGATATATACATTAATAATTTCCGCTTGGCGCTAATATTTTCTGACAC  
CATAATGTAATACTGTTGACATATATATCGCTAATAGGGATAAAAAGTTTGTCCATACCAATT  
TGCTCCGTAGACTCTGGATGTGGTGGCTGAATAATATGTGGCTTGGCTAATATTTGCTGCTGA  
TCCGATTAGCGCAACAATTTGCCTGCATTATTCGGGTAGCAAATAAAGCACCGCCTTTGT  
CGATTATTAATTTGCTGGTCCCCTGGATGTATTTATATACCCACTCAACTCAATCTCAAAT  
CACTCCCAGCTCCAAAGACGCAGAATCAACAACGCTCATACCGGCTGTGTCAGGGAAATA  
GGCCAGTTTACCGCCATAGCAGTTTCACCGCCTGTATACAGGCTGTAATTAAGAACGGAAT  
TCTGCGCTATCTGGTCAATCCACATAATCCACGGATCAGATCCTTGCCCCGGGCATAAAAAGGT  
ATGTCATTACCGATGGAATCACGCAGGGCCAGATTAGTAAAGCCCGAATTAATGTAATACCC  
GTCCAGCAGGCTTTGGGTGACCCAGGTAACCGGCGCTGACACTTTCATGGCCGTATAACTGC  
TATTGGTAGCCCGGATATCCGCCCGGTATATAGCATCTGTTATATCAGACGCTAAGATAGTG  
CCCGGCCCAATCAGCACGGACATGACAAACATACTGACTGCGATAATAAATTTTTTCATGCG  
TGTTTACCCATCAATAAATATCCCAGATACAGAGCATTAAGCAGCGTCAGAATGGCCAGAAT  
AGCCGGATGCAAAAACCCATCAGAGTTGAGCCATTCAACACATGGATGCCCGCAATCATA  
GCCGCTGGTTGTCTGACCATTTGCTCTGTCCCCAGACAAACAATAGAATAACCAGTACTCC  
CACCCGAAGCTGGTCACTATCTGCCAGTCCATGGAGAACAGTTCGGCCAATCCGGCTAGAA  
ACGCTCCTACTACTGTTCCGTCCCATTGCAGTTTCCATTCATCAATTTAATCGGGTCCAGT  
CACGGTCTGAAGTATCAATAGTCTGGTTTTGCACCGAGAATATTTTGGGGCACATTGTCTGT  
AATCCAGGGATTGTGCCCTTGCCATAGGCCGCGCCGGTATCGTTAAGATCGTGCCCTGATT  
AGTTTCAGTAAGGAGTTTGACCGCCAGTTGATTTCCAGGGTACGGCATACTCTATAACCC  
AGTTGCCATCAGCACCTGATTCTCTGATTTAGTATCAAGCTGACTGTAATCAGAGCCGGTC  
AGGGTATAATTAACCTCCGGCGGGCTCCCCAGTATTGTGGAGAGCCAACCATTTTTACTAT  
CAGAGCAGCTTCCCATACGGGTGAATTATCAGCTGTAAAATAGAAGGCTGAATATCCCATGC  
CATAGCCGGAGTCAGCATAAGCGTAGGGTCTACCGCTCCCAGCTGGGTACTCCGTCAGTA  
TCCATTAAGCGGAAGTGGAACAACCTTGTTAGCCGGAGTAGTAGGCTGTCCAGAATCATAAG  
CAATAGTGTATTTAAATGCATACAGACTATCGCCGGCCTCAACGATATTATGAACCACTTGC  
ACATCGTCTATTGAGAAGGTGGTAGGAGTAGTGGGATCAGCCGCCATTACCTGGGCAGCAG  
GACTTCCCAGTACCAAGACTACCGCCAGTAATAAGCCGCAAAGCACCTTTTTCATAGTGATT  
TATCCCTGGCCAGGCGTTTATGCAACACTCCCATTGTTTTGGGACTAACACCCTGTTTCGATTA  
AATCATCCATAATCCGGCGGTCCATTTCCCGGTGTTCTACCTCATCTTTGGGCGACAACGGCT  
CTTCTTCCAATTGTCCCGGCCGAGGTCAATTCCGGTGTGCGTTTGATTATTTCAAACCTTTT

CATACCTCAAATATATCTACAGCCGCGAAAGTATCATAGTATTCGCGAATAGGCTTGGCAG  
TCAGCAATTTTCGTCTTCAGCTGAGACCAGGGTTTACCGGTAAAAAAACCCAGGCAGTCAAAG  
GTCACCCAGCGGATTATTTTCGCTCTTTCCAGCTTGCGGTCTTTTCCCAAGGCGACCAGTAT  
AAGTCCCAGCATAGGGTTAAGAGATGGGTCTTATTACGCATCCGGTAATACAGATCGCCCCA  
TTCCTGAATGGTATAGTTAAAGCCCATGCCACTTTTGCGCCGCTGTTTGGCGATATACGACAT  
AAGCAGATTGAACATTGACATAGAACGTGACGAATCCATGAAGTTGTCTATTTTCATCAATAG  
AGACTATATGCCCCCTGAAATTCTCTATCGGGGTCATAATCATCTGTTCCATGGTGACCGGAT  
GGGAGAGCAGGATTCGCTGGCCTTCAGAATCCCTCTCTTGCCGCAGATAAATATTGTAGCCC  
GGGAAAGTAGCAACCTGTCCATCCTTGGAAGATGTAATACATCAAGATAGGTCATACCTAT  
ACTTTTTCCGGAGCCTTCTGGACCGATAAATCCCCAGTTAAACGGCATCTTTCCCCCTTACGG  
TCCCCGATCATCTTTGGCGTCACGGTTTGCCGCCAGTTTCTTTGAGGTATAAAGCTCAGGTGC  
AATCCGCTGTGATAGCGCCATCACGACTTCTTGCGGGCCATCCCGTCTATGGAGACATTGG  
CGGCCATTTTGAAGAAGTTTTTCTTCTCCTTCTTTGTCATTGGTGGCTTTACAGCGTGACA  
GGTATTCGACCGCGGAATTTACCTGCCCCTCATTCTTGAAACAGGTTTCGCATAAGCAGTTTG  
AGAGGCGTTTACCGGGGTCTACCAACTCCTTAATAACTGACGGGACTTGAGCGTCACCTAT  
CAAATTTTGGACGTCATCGACATTTATGCCACTGCCGTTGCCATTGTGGTTAGACGATGACTG  
GAAAGGGGTAAATCCGTTTTCAGTGCCAAATGGAGTTTTCTAGCCATTTATGCCCCCGTTCC  
TGTAAGAGCTATAAATGAGGTAGATAAAAAACAGGAGAGCCAGCACAAATCGCTACCTGC  
AAACCTATTTTATGCGTTCAGGCCATGGATTGGTACGGGAAAATAGCTCTTTCCTAGGTA  
AGTCCAGTCCAGATATCGATATGTCGGTTCAGGCGGCTCTTTCATTTACAGCCGGTACCCGGTA  
TTCCTGAGAACACCATTTACAGACTGATACAAAATACTGTCTGCCCCCTGAAGCGCCAGC  
GCCGGCCGGCGGCATTTTCTATATGCTGAAGGCTGAAACCGTTTTTCAGGTCACGACCAGA  
GTATTCGGTTTAAAGATTGTTATTATTTTATTCTTCATAATTATTACCCCGGTAAATGGAGTGT  
GCCGTTAGAGATAAGCCCCACTATGACCATCAGAATAAACAGCAGGGTTATGGATAAAATT  
GTTATAGGAAGCCAGTTATTCAGCCATGATTGCTTGTGCTCTTTATCCAGGCTGACATGAGCC  
TCTTCCCTGCACTCATGAGAGATTGCATTAAGTTCACGTATGGATTTGGCATCACGTATA  
TTTTCTTTTGTCCC GCCGAGAAGCACGGGGGCTGTATCCCGTTCGTTTATTACCAGAGTTGAC  
GGTCCGATACCGTTTTCCCTGGGATTAGAGCGTCAGGGAAAAGCACCCATGCCTCCCGGGT  
ATCTTCATCTACAGCCACGCCCTTATATACCGGCAGATCTGGTTCCAAGATACGAGAGTCTT  
CGGTAAGTTTGGAGTGACGGTTGTATCCGCTTTGTTTTCTGCCAGGGCATGCTCATAGTAAAG  
AGTGGGGACTAAGAATATTTCTTGCCGGATTGCTTTTTGCTGGAGCTTCTAGCGCCACGCAC  
ACCCTGGAATGTGAGCAGACCGCCGCCGAAGATCATGGCAACCAGGATCAGAAGAGGCAGC  
ACGTTAGCAAACGGCTCGAGGCCGGTGTAAATCGGCTATGTTGGCATCCCCGGTAATAGCGGC  
CACCCCGTCCAGGATGATCGGATAAATTACCAATGAAACCGCTATAGCAGCAACACCCAGG  
ACGACCTTCCAAATATTTCCACTTTATTACCTCCTCTCATTACTGTGTATTTAAAAAATGG  
ACAATCAGCTAAAGTTTCAGGCCATCACCCGCGGCCTTTGACGCTTGACCAGATTCCGGCAA  
CTAAGACTGAAATAATCGCAACCAATATCAACAGAGGAATAATGCCCGCGAATGCTCCCAT  
ACCGGTAAAGCCGGTCAAGGCATCGTGTTCGTAGGTAATAGTCAGAGTCCGTGAATCCTCAG  
CTGCTAGACCAGTCACGGTTAAAGTTTTGGTAGCTTGAGTCCATGTGCCGGCAACAGGAACA  
TCAGTAACCTCATCTGAGGTAATGGATATAACCGAAGTATTGACGTTGTTATAAAGCTCATA  
CGTAAGTACAACGCCCGCTGAGGTTTACCCGCTCCGGTGGCCACAGCCGCTTCGGTCTCAA  
CATACCTGTCAGTCTGGACGTCATGGGTACTGTCCATAACCATGGGGAAAATAATGAAAACG  
ACTGCAATGCCAATAATTCCGATGACTACCCCAAATATCTTCTGCAAAGCCTTCTCACCCCT  
TCCATAACAAAATATTTTTCTGTTATTTGCGATTGTAGAGGGTATTTTTTTATTTAAGGTCTAC  
TCAAGTAGGCGTTAATCAGATAAATCTTTAATAAAAATTAAGAAAATCTTTACTGAGGGATTT  
GGACATGTACACTGTAACATGAATGCAGAAAAGCCGGAGAGGCAGAGAATGCCGGGCAA  
GACCCATGCAGTACTGGGGCTGAAAGAATCATCACACGAGGTGCTCTCGTTTGTTGACGATA

TCAAGTACCTCAGAAAAAAGGTGGGACCGCGCTCCCTGGCCAGAAGTTTGGGTGTCAGTAA  
AATGACTGAACTTTACTGGTCGCGGGGTGAACGGCTGCCGTCTAATCCAATGTTATATGAGA  
GTGTAAGAGGATGGGCGGAGAGGGAACGGGCAATAGATGCTGCGGCGGTTAGTTAAATTTA  
TATCTGTTATAGTCCTGCTGGCTGGCCTGATTATTCAGCCGGCTGCTTCGGTAACAGCAGCTG  
ACCAGCTGACCGTCCACTTCGAGCGTATCTACGAAAGCCCGGTCAGTGTGACCTTCCGTGTC  
ACTATCACCAATGAGGGTAAAGCCCTGCCGACCTGCCGCTTGAAGTCCATTTGACGGATT  
GAATGTCTCAGACCTATCTCGTCTTACTATTACAGAGCTGACCATAAATGAATATCAGGTCA  
GTTACCCTACCCAGTTTGAACCTATTGAAGAGAGTTATACTGCTACCGGTAAATTGGTACTC  
AGTATAGATGCCAGCGGCCAGACCCTATACCAGGATGTTTCACTTCCGGTTATGGATAAATC  
AGGTAACCTGGTTTCATCCGGAGGGGAAATTATCAAATCAGGTGCCTATGATAGGATAGATC  
AGAAAACAGGTACGGTGTACTGGTTTACGGATATCCCGGTTGCCTGGCAAACCAGTACTATA  
CAGGAGATTATCCCTATAGAATTGGCTGACTGGACAGCAAAATCCAAGTCTCTTAAGGACAA  
TAAACTTAAGACCTCTATATCTTTACCTGAAAAGAGCCTGGAAAAGAACCCTAAAGGTGATA  
CCGGCTGGGGCAGCGGTACCCGGGTATGGGACGTCACCTTATCTCTTCCCCTGCTGACTACT  
GATAGCGGATGGGGCAGTCAGGGACTGATGAAATGGGATTTAGCCGGCACAATCTACTATG  
ATGATACTAACTCCAGCTGGTGAATAATAACTGGCTGTACCGCCGTTTTATCGCCCTGGAT  
ATGACCACAATCTCCGAAACTCTGACCAATTTCCCGGTGTATATCAAATGGATTCCACCAA  
TTTTGATTTTAGCCGGGCACAGGATAATGGAGAGGATATCCGTTTTACAGATGGGGTGAGTA  
ACCTGGATTATGAGATTGTCAGCTGGGATTCTGTATCTGAAACAGCTGAGATTTATGTCAAG  
AATCCTGTTACAGCTGGCCAATGTGGCTACTGATGGCATATATATGTACTACGGGAATAAGGC  
CGTCAGTGATGGACAGAATCCCGCCGGTGTCTGGTCAAACGGATATGTGGCTGTGTACCATA  
TGTCTGATGCCAGCTCTACCCTAATAAATAGCTCCGTAGGCAGCCTGCCAGGTACTAAATCC  
GGCGATATGGCCGCACAAACCGCCGGACTGCTGGGGTATGCCCAGTACTTTGACGGAATAA  
ATGACCAGATAATCGTTGCCTATAATGCCATTCTGGATATTACCAGCGGCAGCGTAGAAGCG  
ATTATCCTGCCTGACAGCGCCGGTACAGACGGCTATATCTTTGCTAAGGGCAACCCTGCCCT  
GGGCTACTACTGCAATACCCGCTATATTGGCAGCATAAACCGGATAGAATGGGCGGGACCA  
TCAGCTGTCCAGAGTAATAATGTTTTTACCGATACTGACTGGACATATATTTGTTTTACCTGC  
AATGGCCGGGCTATCAGCTTCTACCATAACGGCACTGCCGCCGGATCACAGACCCTGAGCTC  
TGACCCGGACACTAATACTGACGGGTTATATATTGGCAACCGGATGGGCGGCAGCAGCGGC  
AGCACCTATTTTGACGGTCTGATTGATGAACTGCGTATCTCGGGTGTGTCCGCTCGGCTGCC  
TGGTTGGCTGCTACTAATTTAAACCTTATGTCTCCGGATACTTTCCTCATTTTCGGCACAGAA  
GAGGGAAAGCCGGCAGATCCGGCTAACCTCTCAGCTGATATCTCAGGAAATAATATTGAAC  
TGACCTGGGTAAAAGGTGACCTGTCCCTGTCTACGGTCATTGTACGGGGCAGTCTGCATTAT  
CCGGAATCACCAGATGATGGCCTGGTAGTATATGACGGCCCGGCTGAAAGCTTCACCGATAC  
CGGTGCTGCCGGAGAATAAGCACTCACTACTACAGAGCCTGGGGATATTCCGGCTGGGGA  
TATTCGGACGGATACAGCCAGGACAGAACGGAGGGAATCATGATTGGAGTTATCATTACCC  
TGGGACTGATAGCTATTGCCTATATAAAGCGGGATATCATTATGACTATTATCGCCGGGATA  
TCCCTGCTGCTCTTAGGCTACGGCATTATAGATCCGGATATTGGCGGAAATGCCATTATACA  
GGCTCTGCCTATTATCCTGATGAGTGTTTACATGATAATCCGGGCAGCCATCTACGCTACTAA  
CAGAAGAGAGGTATGATATGTCCATATTATATGATCCTTCAAATCCTGTAAGCGGGTCTTCC  
AGCCGGGCAAACTGATTGAAAATGTCTCAGGCCGTGATGCAGTTATTATCAAAGCGGCCG  
AAAAACAGCGCAATGGACAGGCTATCCAAAAAAACACTACCGGTCAGTCTGATGTATCGGT  
CAAAGTAGCTAATGATATCTGGACTATAACCGCTCCCGCGGGTTAAAGTACGAAATCAATA  
CCAAGAACGCGGAAGGAGATGTTGCCAGTATATAAATAACTTTCTGGTCAACGCTCAGGCT  
CCGGATAATATTATCCAGGGCGCGGCGGAGCAAGTCCCCGTGATAAAATCCAGTGGCAGAG  
CTATAACAGTAGAGAGTGAAGCGGCAGGCAGCAGCAAAGGAGTAGCTGAGCAAGAACCTA  
AAGTAGGAGATAAGAAATTCCTGCCATAACTGAAGAGAGTTTAGCGGCCGGCAGTGGCAA

AACGTACACATATGAGCCGGTAAATGATTCTGATGCCGGCACCGATAACAGCTCTGATACCA  
CAGGTACCGATAACAATGTAAAGGTCACAGTGGATAATTCTACCGCTTGGACGTTTACTACC  
CCCAATGGCACAGTCTACACCGTGCCTATGGCGGGCTTAGCCTGGTCAGACCCCGCCAAAAT  
GCACGAATATATAACAGAGTACCTCGCCAGCATCGGCGCGCCCGCAAATGTCATCCTAGCG  
GCTGTGGAAAGAACACCAGATGTACTTCAAATGCCAGCTCCGGACTGATGATATAGACG  
AGCTCAAAAATACCCTGGCCGGCATGGATAAATCTACCGCCACCGCTAAGGCTCTGGCAGCT  
TTTATTGATGCCAAGGGTTTTTCATCCCTTTCGCTGAAGAGCAGTTTAAAAAGGCGATTGA  
ATACGGTTTTGATACCGGCTGATTCCGGTCTATGTACCGCCTGATTCCGGATATAACGTAGGCC  
AAAACGCACCGCCCGGAATGCCTGATGACGTGGCTGTAAGCCTGGGGCTACTGCCATCAAA  
TGAACAGATTGAATATAACGCCCCAATTTTGACTGGGCGTATATGCCCAAAAATGAAGCTG  
ATAAGTATTTTGCTGAACTTAAAGAGATTGTGGGTATGATGTTAGCTCTGATAACCTCAA  
CAAGCTATGCGTGAAGCAAATGAAATTGTAACCAGGCAGAACCTACAGGCCAGCTCAAAGT  
CTATATCAGACGCGGTACTGGAAAATATTGCGAAGCAGAACTATCCGGGCAACTAAGAAT  
GGCTGACCTGTTAGGTATGAAACCGTCTGATATCTATAACAAGACGGCAGCCTGAATTCTG  
CCAGAATAGCTACAATTCTAGGTGGCCAACCCAGTGACTIONACAAGACGATTGATGACGTCCTC  
AGAAAATCAGCAGACCAGGATTCAGGATTAGCCCGTGATATTATTAAGAGATCTTTACCTT  
TGGGCAAGCCCAAACCAAGACATTCAACAGAGATGATCTATCCAAAGAATACGATAAGGCC  
GCCTGGCAAGCCGGAATCAAAGGCATGGAAATGGCCGAGAGTAAAGAGGAATTCATTACCC  
GGATAATCAAGCAGCAAAACACCGGGGAAGTTCTCAAAGATTTTACGATCTATATGATTCCC  
ATAGTCGGCACATTGTATTCAATCGGTAAGGGCGATTCCGGCGGTCAAATAGCCCTGTCAGC  
TGCTATTGATGTGGCTACCTTTATCCATTTATCGGACAAGCAGCTGCAATAGCCAGAGCTG  
GAGCTAGACCCGCCGCGGCATTGGGTAAAGCAATATTGGCAGAAGTTAAAGCGCCTCTGAC  
CAGTGTCTACACCCATTGGCAACTGCTAAGGTGGCTCTATCCCCGTTTGAACCATGATTAT  
GCCCCGTAAGATCCCCTAAGCTCAGCTGAATTGAGCTTCCATACCGTCCGTCTGCCCGTTGT  
TGATGTCGGCGGTAAAAAGCGCTTGCAATGGCCCTACGGGATGAAATAACTAAAAAGGCC  
ATCGCGGGTAAACAGCCAAAGCTACAAAAGAGGGTGTAACAGCGGAAATACAAACAACC  
GCTCTGAACAAAACCATAGCTCCGGCCGTAATCAGCGCTACTCCGGATGTCCGCCCTTTTT  
AGACGGCCTGACTGTGGGCGTAGTCAAGGATGATGTAAGGAGCTGCTTCTGTAGGTA  
GGTAGAGATTTATTTGTATCTCCTTCTTTGCATACCAAGTTTTTCTATGTCTACAGCCGCTGGC  
GTTTCAGGTTCTAAAGGCGCTCTCAAAGGCGCAATTATTATCAGAGACCCGGAATTACTTTC  
AAAGCTGAAAATCTCCGGCAAAACATGGGCGGCACAGCCGAAATAGAGATGCGTCTGCC  
GCCGTACGGTATTGCCAAAACAGACCAGCTTTTATATTCCCGTGATGCTTATGGAGATCT  
CTTACATATACTGGTAATTAACGGCAAGGCCTCTCCGCTTACGCAGACAGAAATAAACCAGA  
TGAAGATTATCGGTTAGCTGATACTCTAAAGAATATATTTAATCCGGGTACAAAAGCCAAG  
GTCAGCAAAAAGCAGGTAATACTACTCCTTACGATGAGTTAGTTGAAGCTCAAAAAAATG  
TAACTCAGATCAAAAAGCAGCTGGAACAGCTTAAGAAGACAGGTGCAATCAGCCCTCTATC  
AGAAGGAACATACGCCCTGGGTGATTTGCACGGCAAATATAACCAGGTAATGCATACGCTC  
ACCAGAGAAGGCTTCGTAGATGAGGCCGGCAACTGGATAGCCAAAGATACAACCCTTGAC  
AGGCCGGTGATATTGTAGACCGAGGTTATGGCGGCACTAAACTGATTAATAAGATGCAGGTT  
CTTGACGCACAGGCTAGTAAAATGGGCAGCCGTATAACTACTCTCATGGGTAACCATGATAT  
AGTATTCGGAGCAGTAGCAAGAGAGCTGAAAATCTGCCTCCGGAAGTCTTAGCCAGGCA  
GGCAAGGTACGTTGAAAAGAGTTGCTTGGTAAATACGCCGAATATTTTAGAAGTACAGGTA  
ATGAACTTCAGCTAAATTAATGGAACCTTTGCTGATGGCCGCGGGCATGTGGCTGAGGCC  
TTATCAGCTGATAGTAAAATCTGGAATGGCTCAAAGATCGCCCTGCAATGTACGTAAAGGA  
TGGGGTTCTATATGTCCATGCAGATAGCCCTAATGTATATATGCAGCTCTTAAAAGAAGCTA  
AAATCAAAGGGTTTAAAGGCAGCAATCTTGAGATCGTAAACAATACTAAAGAACTGGC  
TAAGACCACCGAAGGATCTAAGCATTTTTATGACTTGATGGTCAAAAACCGCTATCAGATGA

CTAAAGAATCAGCAATGGAAATGCTGAAAACATTTGATGCTGAAAGACTCGTTCATGGGCA  
TACACCTCAAGGTGGCCGCATAACTTCCAAGTATGACGGATTAGTGACGAATATTGACTCAG  
GATCCGGTACCAACGGCGTATCCAAAATACATCATATAGGTGAACAGAATATCAAATTAGTT  
CGTAATAAAGCCCGGGCTATAACACGCGCCGAGATGGAAGCTGAATATGCTCGTGCTATGG  
AAGAATTCAGGATGCGGGACATGGCCGTCAGACGTGGCTATACGGTGCCTTATACAGTAGG  
AGGTTTCGTAGGGAAAGCTGTAGCAATATCGGCACGCCCTCAACAATCGAGCCGCAGGATA  
GCTACATCAAAGAAGCCCGTGAACATCTGAGCTAAGACGCCCTATACCAAATA

>Dmc\_IME2

AAGAACCCGAATATTTCCATCTCAGCCTCCTTGTGCTAAGTAATTAGGCGGGGTATAATCGT  
GATTAAGGGTTTTATTTCTCACCTCTCTCCACCGGGGAATTGCAGTTCCCCGGTCTTTTTATC  
TTCACTTGGTGCCGACCAGTTCGGGGCTTGTGGATATCATGCTGGGTGTCCCATCGCTTCCAGC  
AAGCAATCAGATCATCACATTCAATAACCCGGATATCTCCTTGGCCGCCGATATATGTATAG  
TGATAACTGACATCACTTCCAGTATGTCCGCAGTGGGAACAGGTAAGTTCTTTCATAACCAA  
GCCTCCGCCATTGCCCTGATTTTCTGTTCGCCTTATTAAGGATTCATCAACAATCTGTTTA  
ATCCATGCGTAAGGGATAATATGCCGGTCTCCGAAACCTTCCAGCGTGGGTATTTCCGCCCTG  
GTAAATCTTTTTGCGGACAGTGGATACACTGACATTAAGTAGCTCTGCAGCTTCCTTTACAGT  
GCAAGTGAGCCTCTCCTTCGGTAAGTCTGTCTTCATCATTTGAACACCTCCCGGAATTTGGTC  
ATAAATGTCTTGTGTGTGATAGGTTCCGGTATGCGTATAATTGGTTTTGCCGTAGATTTACAGCA  
TCAATAAGAGGCTTTAGCTCAGGGAAAGCACGGCCTACGCCGGAGTAGAACTTTACGGTAG  
GTTTGCGTATTCCCCTTTAATGCGAGAATATGACGAATTGCTAATGCCAATCTTGATAGAA  
AGGGCTTGATCTGATAGGCCTTCGTTTTCTTGGTATTCAGTGTAGTCATTAAGAGTGTC  
ATAAATAACCTCAAAGTAATAACTAAGGTACAGTAGAAAGAATATACCCGTTATCATGGTT  
TGTCATAAAGCAAATTAACATAATTGGCACGTTGCTAATTAGCAAACAAATGCCCCATAATT  
ATCACGTATTGCTATAGAATGTATGAGGTGTTACCATGAATATCGGTGAAAAAATAAAGGA  
ACTGAGACTAAAAAAGCGTATAAGTCAGGAAGAGTTAGGCAAATTTGCTGGGTTTGCAAGG  
ACTTATATAAACAAAATTGAAGCAGGTAAGATACCCAATATCACCATTTAACGGCACAAA  
AGTTAGCAGGAGCATTGGGTGTTAGCACTGATGATTTGATGGAGAAAACATCTAGTGACAA  
GTCCGGATTGTCTGACCGCCCGATAGACGATATGCTTTCAGTATTCTCTACTAAGCTCCGGCA  
GTTAGAGATAGTTGAAATACCTGTCCGGGGAGTTATTCCTGCTGGTAATCCCCTGCTGAAG  
AAGAGATAGATTTAGGCGTTATAAGAGTTCCGAGAGAAGTAGTGGAGGGAAAGATAGATAG  
AGTGTGCGTTAAAGATTGGTGGTGAGAGTTTAAATGGTGATGGCCTTCACTCTGGCGATA  
ACGTTCTTATTGACCCGGATGCTCCTATCATAGACGGTAAGATTTATGCTGTCCGTATTGGCG  
GCACAGAGGTTCTGGCAAGGCATGTGTATAAAGAGAATGGCCATCTACGCCTTGAAAGTTCC  
AATGGCGAATACAAACGGCTCCTGGCTACTGATGTGGAAATCCAGGGGCGTTTAAATATATCA  
GATGAGAAAACATAAGGGGGACTGATATGCTTGACGAAAAGCAAACCTCGTAAGGCTATCC  
TTGATGCCCGTAAATGGTAGAAGAGGTGGCTAAGGCTGATGGAAACGAAGCTGAAACGAG  
ACGCAGAATAGAGCGAATATTTGAGTCTATATTAGGCTATGACGTTTTCAAGCATATAAGCC  
GGGAACACGCAGTACACGGGGTAGGTGACACCGAGTACTGCGATTTTGCTATTCAGATAGA  
AAATGGAGCCACTTCCAAGCCGGTAATCCTCGTTGAAATCAAAGGGTTAATGTTGACCTTT  
TAACTAAGCACATGAAACAACTTCTTCCATATGCCATAAATGTAGGTTGTGAGTGGGCAATT  
CTGACCAACGGCCGAGAATGGCGTCTTTATCATATATCCTTTGGGCAACCTCCCGAAGTCAC  
TATGCTGGCCAACTGGGATTTAATGAAAGATAATCCTGCAGACTTGGTAGATAAATTCGGGC  
TTATTAGCTATAAGGAAATTAAGAAAGATACTTTGTCCCACCTCTGGCAGAAGAGTAATGTC  
CTAAGCCCCGAGAATATGCTGCGGGCAGTTTTGTGAGAAGAGGCATTGAATCTGTATAGGCG  
GGAACGAAAAAGTGACCAAGGTCACAGTGACTCCTGAAGAAATAGTGGGTGCTGTCCGC  
CGGCTGCTAAACGAATCGGCAATGACTGAGATGGAGAAAATACGTATTTGCTTACCCGAGA

AAAGGGTTGTTACTCGGAAAACCTGCCAAGACTGATACATGTGAATGTGATATCTAGGAGAA  
ATAAAACGGTGTAGAGCCCTTAATGTTTATAACAAGTTACTTTCAAAGTGTGTATATTCAT  
GGTTATAAATAACGAGGAAAACATTACTTCTGTTGAACAACCTTGTAAAAGTTATATCAAAT  
ATGATCAAGCGAACACCATTTATAGAGGTGTTAATCACTCTGAATATGATTTAAAACCCAAG  
ATTGGGCGTCAAGAATTTAAATATGATAAATCCAAGATTTCCATCAATGATAAACGGCAAGC  
AATTGAAAAAAACTATTTATTGATTTTCATACAGAGAACTCGTACTCAATTGAAAGATAATC  
AATCTAGTATAAACGAAGAATGGGAAATGTTAGCTTTAGCTCAGCACTACGGATTACCTACC  
AGGTTGCTTGATTGGACTCGGAATTCATTAGTAGCAGCGTATTTTGCAGTTGAAAAATTGCA  
TAATGATGCAATTAATGAATCTAACAAGTATAAAGGTCCTCTGCGATATATGTAATCAAAA  
TATTGGATAAAAAATTTAAGCTTGATATTAGTAGGCATTCGTTTTCTCAGGAAAGTATGCATA  
GTCCTTTTGTAGTGTGAAAAGATTGGTTTATTTGACCCCGCACATATAACCCCTAGAATTATTG  
CTCAAACGGGTGTTTTTACCGTGCACCCTGTTTGGTGGGATGACGCAGTGTGGGACAGCA  
GATAAGTGTGGAGGCAAAGTCAAATTAACATAACTGATTATTCCTAGTGAATATCGGCGCAT  
TATAAACACCAACTACATACTCTAGGTATTAATAGAGCTAGTCTTTTCTGACCTCGATAG  
TTGGGCTCAACATATAACATGGTTGAGAACAAAATCTTATGATTGATGGTTGAAAGGATAAA  
TGGATATGGCTTTAATTACGCGTAATGGAATAATTGGTAAAGTATGTTCCATATGCCATGTA  
TGGAAACCTTTAAATGAATTCCTAAAGACCCTAGCCACGGACCTTCTCAAGGTGGTCATCA  
TTGTAGATGCAAAAAATGCCATGGATAAACATTTAAACATGTATAAGTCAATTATTAATTAT  
GGATTTGTTAGAATGTGGGGTTAAAAAATGTTAACGAATGTTGATGACATTAATGGCATGAA  
ACGTTTGGCAAAGCAAAGAATAAGTTATTCGACCAGTACTTATTAAGATGCATTATTGT  
CTGAAATGGAATCTAAAGGTTGGAAGCTTGTAAAGAGAAATAAATCTAATGTGCGAATTCA  
AAAACCTAGACTAGAGTCTGTACGCTTTGAAGATAGGGTTTGGTTATTATTATATAAACTTG  
GATTTTCATATTTATCAAGTAATGGTGGGGCTTCACTGTCGCTTGATGAGAAGAAAGATGGG  
TCTACTGAAACACAAATTAATATTGTTGCGGTAGATGATGAGGTGGCGTTAGCTATTGAATG  
TAGGACTTCAGAGAGACTTGCAAAGCGCCCCCAACTTTGTGAAGAAGTTGAGAAACATACTT  
TAATCCGCGAGCGTTTCGCAAACGCAATTAGGCATCAATATACAACTGCGAATAAAAAACA  
GGTTACTTTCGATGTTTTTATCGAATATAATTTAACGGATAATGATAGAGAGCGTGCAG  
AAAATGCGGGTGTATTATATTCGATAATAAAGATTTAGCTTATTATGAGGCTTTAGTAAAA  
CATCTTGGCCCCGAGCTAGATATCAATTTTTATCTGACATGATTCCAATAAACCAGTTCC  
GGGTTACAGATTTCGAGTTCCTGCAATCCGTACCAAATGGGTGGGTTTAGGTGTTATACATT  
TTCCGTATCCCAGAATATTTATTGAAGATTGCATACGTATCTCATAGGGCAAAGGGAAAAG  
AATCAGATGTGAAAACCTTATCAGAGGATGATTTCTAAGAGGCGTCTAACGAGTATAAGAGA  
ACATATACATGATGACAAAGGGATATTCCCAACTAATATTGTTATAAATCTTGGGAGCAAGC  
CTTTATTTGAGCAAATCCAGCAAAAAACAAATAAGGATGAACTAGAAAAAGGTGTTTTAGG  
GTGGTTAGATTTAAAACCCACTTATAAATCAGCATGGATAATAGATGGCCAACACAGGCTGT  
ATGCGTATTCCGGGCTTCAAGAAGCTAAAAAGGCACTCCTTTCAGTATTAGCTTTCGAAGAA  
TTACCTCCTAGTAAACAAGCTGAATTATTCATTGATATAAATGCAAACAAAAAAGTGTA  
ATCCTCTCTCCTGCAAGAATTGTACGCAGAATTGCATTGGGATGCCGATGACCCAGAGGTTA  
GAATAAGAGCAATAATATCTAAAGCTATCCAAGATATTAGTAATGACCCGGAATGTAAGCTT  
TTCAAAGAATTCAAACGTGTGATACGAATAAAGATAAAAAATAGATGTATAACTTTAACAA  
GCATCTTTAGTACAATTGAACGAGCGCAATTCTATATACAAGATAAAAAGCATGGCGATGTA  
AGCGAATATGGCCCTTTATGGGCTGATACAAACGATAAAAATCTTAAAGAGAACAGAATATA  
TTTTAAAGAAATGGTTTGTGTAATTTATAATCATAACCAAGAATGGTGGGATAAGGGTTC  
GACCCTGGTGGTGGGTTGGCAATGAATGATGGGATATCTACTTGTATATTTGTTCTTCAAAGT  
GTATTTCAATCTTTAATTGCCCAAGGTCACAAGCTTGGTTCTTTAAATAACGAAAAACTATTT  
ATGGAAATTGAACCATATGGGAATGCTTTGGGCAATTATCTAGGGACATTGACAGAAGCAG  
AGAGAAAGGCCTTTAGGGCATTAAAGGGCTGCTCAAGGGATAATTACAAGAACGAGGCAATG

TCAGAAAGCTATTAGAGAGGCAATACCATCTTTTAATCCAAATGGATTAGAGGATTTTATAC  
AGTTAGAAAAAAACAACTAATTTAAAGACAAAAGAAGTTGTAGACCACATTGAAAATAA  
TCTTAAAATATATGTAATGAAGTTGCTGAAGGGGAAATACGGAGAAGAAGAAGCTGGATGG  
TGGACTCAGGGTGTGCCGAAGGCATTAAGGCAGGAAGTAGTAAAACGATATGAAGAAGATG  
ATGGTAAGCGGGGCGGGAAAGAATACTATTTTAATTTAATAGATTATCGTTCGATTATATTG  
AGTAATTGGGCTATTTTAAATCGTCTTTAGGCTTTGGTAAGTCAGGTAACAAAGAAGAAAA  
AACAAAGTGGTTGGTATTTGTAAATGAAAAGCGAAATATAGTTTCTCATTTCATCATCTGGGG  
TGTTAGTTTCGATAGAAGATTACAATGAACTTGCCGAATATGATAAATTATTGAGTAAATGT  
CTTTCGCATGAAGATTCTATTAATAATTAATTGAGGATGAGTAATATTATTCATATAAAGC  
ATATGTATTTAATAAGGTTATAAATTCTAAAAGAATACTACTCATTGAACCAGATTATAAA  
GCAACTTATCCACCTTTGGGTTTAAATGAAGTTATCCACTTTCATAAAAAGAGCTGGAGATGA  
AGTTCATTTTTTGAAGGGACTTCATCTGGGGTTCGTGACCAGCATTGGGATCTGATATATAT  
CTCTACACTTTTTACCTTCCAATGGAAGAAAACTTTAGATACAATTCAATTTTATAAAAAATAA  
CAAGTCAAAGGCCCCATAATTGTAGGAGGGGTTTTAGCCTCGTTATTGAAAAATGAAATTG  
AAGAAATAACAGGAGTAGAGGTGCATTTTGGTTTATATGATGAAATTGATAGGCTCACACCA  
GACTATTCGCTAATAGAAGATATTAAGAGTATTCTCTTCATGACGCTAGCATAGGTTATAT  
GACACGAGGTTGTATCAACAAATGCAAATTTTGTGCGGTGCCTAAGATCGAACCTAATTTTA  
TTAACTACATAACCGTTAGAGAACCAACTGAGTAAAGATAAAAAGGATCTAGTGCTATTTGAT  
AATAACGTTCTTGCATCTGATGAATTTCCGCGCATTGTGCGGGATCTGATTGGCAATAACTTC  
AATAAGGGAGCCAGAGTTGGTAAACGTCAGCGATTTGTAGATTTTAAACCAGGGTATTGATGC  
TCGCTTAATTAATGACGAAAATATGGCTTTGTTATCATCATTAGCGCTTAGACCCCTAAGGAT  
TGCTTTTGATGATATTAATTAGAAAATATTTATGCTAAGGCGGTTCATGTTAGCAAAACGAT  
ATGGGATTACTCACCTCTCCAATTATATCTTGTATAACTATTTGGATACACCAGAAGATTTTT  
ATCGTAGACTTCGCATTAATGTGGAGCTCAATGAACAACATGGTCTGAGTATCTTTTCTTTCC  
CAATGAAGTATGTACCATTAGACTCCTTTGACCGAAAGTACGTGGGAATAAATTGGACTCCG  
CAACAATTAAGAGGAATCCAGTGTATTCTACATGCGACTCATGGTGTGTGGGGCCTAAATT  
GAAATTTTTTAATGCGGCTTTTGGTAATCATGAAGATGAATTTAAATATATTATAGAACAGC  
CTGAAGAATCAATATTCTATCGTAACAATTTATTACCATAACGATGAATATATAAACAGATTG  
AATATATCTACATGTGTTTAGTCATGGTCAAACAGCATACTGACTAATCCCAGAGAGATAAA  
CTATGCGTGGCTATATTAAGAAACGTTCTTTCGGACAGTTACTCAATAGTAATATCGCTGGGC  
AGAGACTCAGTTTCAGGCAAATATAAACAGCGATGGATTACTGTGCGTGGAACATAAAAAG  
ATGCTCAGCAAAAATACTGAGATACTGCATGAATATGATACCGGCACTATTATAGAGCCG  
GACAATACCACATTGGCTGAATATCTGGGTAGGTGGATTGCCGATATGCAACCAAGGCTTGC  
CCCACTACTCTTGATGGTTACACGGATGTTATTAACAACATCTGATTCTGGTCTAGGGCA  
CTGTGTACTTTCAAACCTTACACCTGCCACAATCCAGAAGTATTATGCGGATACGCTTAAAA  
GAAACGGCGAGATGGTAGACCAGGTACGCTTTCTAATCGGACAGTCCGCAGCCATCATAT  
GGTATTACACAGGGCGTTAAAGACGGCTGTTAGGCTACGGCTTATCGCTTACAACCCAGCTG  
ACAATGTTGATCCCCAGTAGCTTCAACCGCAAATATAGGGCTGTTACACCTGAAGAGATG  
CAGGAAATACTCGAAGAAGTTAAAGGCACTCCATATTACGTTGTATTCTATTTATTATTTAT  
ACTGGTTTGCGCCGCTCGGAGTTATTGGCCCTGAAATGGGGAAATATTGACCTTGTTTTGTGC  
CAATTATCTGTTGGCCAGTCCTTACACCAGCTGCATAGTGGTGAAGTTGTTTATCGTCAGCCT  
AAATGGGGGAGTGCTCGTAATATAGCGCTTACTCCATCAACTGCTGTAATTTTACGTGGTTA  
TAAAGAGACGCGTGTTCAGAGGCTAAAATTATCGGCAGGAAATTCGCTGAAACTGATCTG  
GTATTTAGTCATCCTGATGGCACTCCTTTATTGCCTGGTTCTATTTCCCGTAAGTGGACTAGG  
CTAATGCGTAATATAGGTCTGGATGGGGTACGCTTGCATGATACGCGTCATACTCACGCAAC  
ATTGATGCTCAAACAGGGGACACCCCTTAAGGTTCGTCCAAGAAAGACTTGGGCACAGAAGC



ATCAAAACTACAGGGGATATATATGCTCATGTTTTACCTGGTATGCAAGAAGAAGCAGCTGC  
TAAGTTTGATGAGATCAGTAATCCAGAATACAAGCGAAAATAATTCTGCTAA

>Dmc\_IME-OG24

TTGTTTGCTTTCCTCGCACTGATCAGTGGTTGTGAGCAAACACAGCCTCCATCTGTTCAGACG  
GAAATTCAGCTGCATGCCCCGACTCGCAGGTAGAGATAGATAAATTAATCTTATCCGAATT  
TCCTTTTGAGTCTGAGGGAACAACCGAATCTGTGACTGTGTTCAATAGCGGAATCCGCCAGA  
TCTATTGTACTTTCTGGCTAACAGACGATTTGTGCTGTACTGTGATTACCCTTCAACTTAAGG  
ATAATGCTCAAGTATTATTTGAATGGAAAATGAACGGTAACCAGATAGGCTTTCCTCAA  
GTAATAATGGAATTTGAAACGGGGCTTGGTACCGGACAATATCTTTTGAAATCTATATGGA  
TAAAAAGATGCGTGTAAATTTGAACTGGTTATAGTTTAGAACTTAAATTAGACATCTGCAC  
TTATATATTCCACTTGTGTTAATAGTGGTGTGGTTTCTATCCATGTACATTTCTAAAGTAAA  
CCACACCACTATTATCCAACAAAAGTCTTTAACTTAAGATATTCGGGTTTAGACCTTTTGGT  
TCTTCTAATAGCAAGCTGCCAAGCAACCGCAAGCAAAATAAGAGATGGCAAACCAGTAACT  
AACAGGAAAAGATAAGCCGCCTTGTCTCTGCTTCGGCAAAGCGCCAATGAAATTCTGAA  
AAGTAAACAGGAGCAACCCTAATCCCAAAGACCAATAACCCAATCATAACCAGGTAAGGTT  
CAGTCCCTTGTTTTAGCAAATTGAACTACTCCCCAAATAGCTAACCCAACCAGTATACCTAT  
AATCATCCACATAGCTTTATCTCCTTTATCCTAGCTTATTGCTGCAGCAGGCCTTTGGCTTTGT  
AACCACCATCAGTAACACCAACAGTAGTATCAAAAGCATAGGCCGGCAGATTCATGTCCCA  
CCAATTGTTCCACTCAGACTCAGGTGTAAGTCCATAACCAAAGA  
ACTTGTGAGCCTGTTTCA  
TGAAACCATTGAAGAGACTGGTGGTAGCAATAGTACCTTTAACTACCTGGTGTATCATGGAG  
GCATTGTCCACGTTGAACACGCAGGAACCCATGCAGATACCACAGGAATAACCACA  
ACTCT  
CAGTCCACTGTTTGCAAGATGGTTCATCACGCCAGAAAACCTTTTTGCCCGGAACACTGTAT  
TCTACCGGAACATTGGGAGCATACTTGAAGGAGTGATTTCCCATGAGGGTTCTTTGTCATA  
TGAAATAGACTGCGAAGGACAGTTTTCAGCGCAAATAGCACAAGTCTTACAGAACC  
GCCAC  
ATACCGGCATCTATAGGTTTGGTAGGAGTTAACGGCAAATCTGTGAGGAAATGGAATGATCC  
GTGGGTTGAACCGTATTCAGGGCTCAAACAGACATTATTTGAACGCCCAAGTTCACCTAAAC  
CAGAGAAAATAAACCCAGGAATAGTAGGCATGGGTCCATAAGCCCTGGTAGGATAACCCAA  
ACCCTGATAACCAAGGGTCGTCAGGAAGCCTTGAATTTTGGTTTGCCAAACAGATGCCAGAC  
TATAACGGTGACCATTAGTTGCCACTCTCAAATTGCCGCTACCCTGTGCCCACATTTGCGGGC  
TCATAGGCTGAATAACTGAAACCACAAAAAGTTCCTTTTTGTCCGGAATCACCAGCTTTTCA  
GCGGTTTCATAGCCTTTTTCAACATCTTCGAACACAAACGGACGGGCATCTACAGCGGGTAT  
AGGCCATTTTTCAATGTATTTATCGCTCATAGAGGCCATGCCACCTTCGCGAACACAGGTTA  
ATTTATTCTTTACATTTGTATCGTAGGGA  
ACTACGCCAATCTGGGCAGCGCCATAGAAGCGT  
AAAGCCGCTCGCAACATCCTGAGGTTAGCATCAGGATCACCTGCCACTTGGGTACTCCCAG  
TACATCAGGCCCTTTTATGGTAGATTGACCGGTGAAACTCTTACCACCACCCCAACCCTGAG  
CAGTTTTAGTATATGAGAAATACGGTTGAGGAGCATTATACAAACCAGAGGTA  
CTACCCAG  
GGCAGTTGCTCTTAAGTCCATGCCCGGTTTACCAGTTTCCAGAGCTTCTTTTTTGTATTGCGGC  
TGCACTGGCGGCAGCTTCTTTAACCTTGTCAACACCTACATATTTTGCCCATGAATGTTTTAT  
CCACATGGTTTCACATGTATCATGCCGGGACATAGCTTTCCAGTCATATTCGGTGGTAATATC  
CCACAGGTCACGTTCTTAATCCACCAAGCACGCGGGAAAGTTGCAGTGGGGGAAGCGACT  
AAATCATCTAGGTCTCTGAACACCGGAGCAACAGCTGCTGCCGCACCCGCACCAGCCCCTAC  
AAGACCGAGTGCCTTCATGAAATCACGACGGTTAATCACACTATGAAAGTTAGCCATATTTA  
TTCTCTCTATTTAGTATATTCAGCCTCATTTATCTGAAATTCTGCGTATACTTAATCCTCCTA  
CTTTATATTCAATTAAGCCTATAAATATAGTAACCACCACACCTAACAAATGGCCTTACAGTT  
CCATTCTTTGCATTACA  
ACTTTGTAATCAGGCAATAAACGGTGGGATTAGTGGTAAAATATT  
TAAAGGAAAGGTA  
ACTAATAAAACATGAAACATATCTTGCTTTTTATAGCTGTTATCTGTCTG

ATAATTTTGCCTGTCTATTCAAACCCGGTACAAGCTCAGGAATTTACCAGATTTGAACATATC  
TCTATAGACGATGGATTATCACAAAGCAGTGTAAGTCTATTATTCAGGACCGTGAGGGGTT  
CATCTGGTTTTGGTACCAGAGACGGACTAAACCGATTTGATGGCTCCACCATGCATACTTTCA  
GTAATAACCCGGAGAACCCGGGATCACTTTCTGACAGCTATATAAACTGCCTTTTTGAAGAT  
AGCCGAGGCATAATCTGGATAGGTACTCTCTCCGGCGGCTTGAACAAGTTTGATAAAATGAC  
AGAGACATTCTCTACTTTTCGTCATTCGGAGGGAAATAGCGAAACCTGGCAAGTGACAATG  
TACGCATGATGCGCAAGACCTGGCAGGTTTTCTCTGGCTGGCAACACCAAACGGATTGGAC  
CGCTTTAATCCGCATTCAAATTCTTTGAGCACTTCAGCCTTCATAATGGTCTAAGTAACAAC  
TCTGTTTTGGTCAATACTTATAACCAAAGAAGGCACTGTCTGGGTGGCACTGAAGATGGGAT  
TGATCAATTCCAGTCAGAAAATGGCATATACAAACACTCCAACCGACTCACAAGTGACCTGA  
GCGGCAATACAATCCGCTATTTGTTTGAGGATAAAACCGGAAATATTTGGATATCCACCTAC  
AACGGCGTAGATTGTTTGAATCCCCTATCAGGCATTATTGCCCACTTTGAAAATATTCCGGG  
AAATCCTTCCAGTCTGGGCAACAATCGAATCCGGACAATTTGTCAGGATACTGCCGGAAGTC  
TTTGGTTTTGGCACAACCGATGGACTTGATAAGCTTGAGCAGGGAACGAATGAATTTATCCAC  
TTCAAAAATGACTCCGGAAATCCAGACAGTATAAGCAATAACATAATCTGGTCTCTAATGGT  
TGACAGGTCAGGTGTCCTCTGGATTGGGACATTAACGGCGGAGTAAACAGGCTCTCACTTA  
CCAAGCAGGTATTTATTTGTTACCGCAATAATCCGGGAAATGCTAATAGCCTGAGCAATAAT  
ATTGTTAAATCTATTTACCAAGACCAGAATGGTATTATCTGGATTGGTACTCTGGGTGGACTT  
AACAAATTTGACCCACTGGCTAATACCTTCTACCTATTTAACCATGATGGATCCAACCCACA  
ATCTATAGCTGGGGATACAATAAAAACCATACAGGGGATACAAACGGGAACCTTTGGGTT  
GGCACTACTAGCGGCCTGGACAAATATTCCGAACAATTAATCAGTTTACCCATTTACACACA  
TAACCAGTCGGATACTAAAAGTATAAGCGATGATGTTATCTGGTCATTATTTTTTGACAGCC  
AGGGGCAATTTTGGGTAGCCACTAATAGAGGACTGGATAAATTCAACCCCGATTCTTCCGAA  
TTTATCCATTTCCGGTGCTGTTTACGGGTTACCAGAGACTACAATCTATACTATTTTTGAATAT  
GAACCCGGAGTATTGCTACTGGGTACAGATTACGGGTTATATAGGTTTGATACTATATCCGA  
AACATCAGTGCCTTTCCGTTTTGATGCCAATAACCCCACTATCAATAATAACGCGGTCA  
GATGTATTTATCAGGCAACCAATGGCACTATTTAATAGGCACACATACCGGATTGAATAAA  
TTTAACATCACCGAAGGTACTTTTGAACGCTACACTCAGATCAATGGAGTTACCTATGGCAT  
TCTTGAAGATAACTTCGGATATGTGTGGATCAGCGGCAATAACGGTTTAATAAGGTTATTTTC  
TTGCTAACGAAACGATAAAAACCTTTTAATAAAACAGATGGATTGCAAAGTGACGAATTCAG  
CGAGGGTGCCATTTTTAAAGGTTCCCTCGGGTTTACTGTATTTTCGGAGGCATCAATGGATTAA  
ATGTTTTTGACCCTTCAAACACTGCAAACAGAAACAGCAAACCCAATATTATTATTACCAGT  
CTTGATTTAATAGGGGGGAATGCTTCATTTAAGTTGCCGGAGCAAATCTCCGGCGGTATTAC  
TCTGGAGTATGAAAACAACCTTTTTACCATTAATTTTACAGCTCTGGATTTGAAAACCTTACCA  
AAAGGTTAAATACTATTTTACGCTTGTCGGTTTTGATAAAGACCTGAGAATTGCGAATTATG  
ATCAACGTGACATATCTTATACCAATATTGATAATGGTAAATATACCTTCAAATTTACGCC  
GCAGACCAAGATGAGAGCTGGGTTTCCGATACAGCATACTCAATATAAGAATCACAAACAC  
CCTTTTGGGAATCATGGTGGTTCTACTCACTCTGCGGTGTTTCGTCCATAGCTACAATCTATT  
TTATTGTTAAATTAAGGATTTGGGCTATTCAGAAACAAAAGAACCATCTGGAATCTTTAGTA  
GAAGTACGTACAGACCAATTAAAAACCTGAGATTGAAAAACAACAATCATCGAAAATAAAC  
TCAAGGACGAAATTGAAAACCGAGCCAAGTTTACACGCGCTCTGGTTCACGAACTCAAAC  
CCCGCTTACTTCTTTCTATCTCAAGTGAGTTGTTTACAGGTGAAGCTACAAATGAACCATT  
CGTAAGTTTGTACGAAGCATAGAACGCTCTGTTACGAATCTGAGTAAGCGATGTGACGAAA  
TGCTAGACCTGGCCAGAGGAGAAACAGGGCTTTTAAAGATAAGCAAGCAAATGGTAGATTT  
AGATAGTTTTGTTGAGGGGATAAAAACGGATCTACTGAGTATCGCATTTTCTAAAGGAATAC  
ATCTAACATTTGAGTATGCAAAAAACACACGTAAAGCATACTTGATCCAGACCGAATTAAC  
GAAGTTATTAATAATTTAACAGATAATGCTTTAAAATTTACTCCCCAAATGGCACGATTAC

CATTA AACAGATATCTCAAACGAACAATTTATATTTGAAATATCCGATACTGGTTGCGGCA  
TTAACAAAGACTACCAAAAACGCATGTTCTCACCTGGATACCAAGGGGAAACAAACCCGCG  
GCTGGACGGGCTTGGCATCGGATTAATTTTGGCGAAAATGTTTATTGAACTTCATAAAGGTA  
CAATCTGGGTGAAAAGCAAGCCGAAATCAGGGAGCATATTCGGTTTTTCTATCCCGATTGGG  
GAAAAAGATTAATGAATGTTGTAATAATTGAAGACGATGATGTAATAATTGAATCTCTGACG  
CTGCTATTCGGGATGCGCTGGCCAGAAGCCAACTTGTTTCATCTAATCTGGGGGACAAGGG  
GTTGGA ACTCATTGTTGACTGGAATCCAACTTGTAATACTTGATTTGGGTTTACCGGATTT  
GGATGGACTGGAAGTTTTGAAAAGAATCAGATTATTTTCAAATGTGCCGGTAATCATTTTAA  
CCGTAAGAGGTGATGAGGCGGAGATAGTGAAAGGTCTTGAATACGGTGCCGATGATTATAT  
TACCAAACCTTTCAAACA ACTGGAATTTTTAGCCCGTGTTAAAGCTCTTACTCGAAGGCAGG  
AGGTGCCGGCAATTGCAACCTGTTATCAAAAAGGACCATTCCAGTTGGTCTCAGCCACGCAT  
AAGTTATATTTAAAAGATAAAGAAATAACCCTGACCAACACTGAATACCTCATTTTTTATAA  
ACTACTTGAGAATGCAAAATATGGTTATCTCTCACAGCACTCTCTCCAAGATGCTCTGGGGCG  
AAGATTATCCGGATTCCATAGATGCTATTAGAGTATATATAAGCAGAATACGGCAAAAAAT  
ACATGATGATTCGTCAGAGCCTTCAATCATTCTGACAAAACCAGGACTGGGCTATATGCTTA  
GCACATCGAAAGCCTAATACTAATACTTACAAGAGTCAATCCCAATAAACCCCTACCACGG  
GCTGGGAATGGAGTCCGGGCTGTAAGTCGCTCCCCGTGCGGGAGCGTGAATTGAAACATCA  
ACTACTTGCTTAAGCCCGACTGAGATGACCGCGTCGCTCCCCGTGCGGGAGCGTGAATTGAA  
ACTAGGTATACTAAAGAAGCATATGTTAAAATTATTATAAATATGCTTAACCATAAAA ACTAT  
GAGGAGAATAAATAGGAGTGCAAAAAATAACTAGTAACCTGCCTCTATCTTACTATATGGA  
ACTAAAGTACCAGATTATTTTAATACCTGACCCCTCTGGCGGATACGTGGCAACAATAGAAG  
AACTGCCCGGATGTCTCTCTCTGACCTGCCCCCGATAGTGATACCACTTTTTAAGTAGTTACC  
ACTGCCATTATTGCCTCCGGTGCTGGAGGACGATAACCAAGAGAGCTGTGAGGCCGGACTTG  
ATTGTACTGCCTCCTCCAGTCAGTAATCAATACCCGAGCTTCAGCAAGCGTAGTAAAGATCT  
CCAAGTTCAATAATTTCATCTCGCAGTTTGCCGTTGAATGATTCAATGTAGCCATTCTCCAAG  
GAGAGCCGGGTTTCGATGAAAAGAGTCTTGATGCCAAGTCGGGTCAACCACTTGCGTATTGCT  
TTGGCGGTAAATTCGGGTCCGTTGTCTGACCTTATATGTTCCGGGATACCCCTAAAAATGAA  
TAGATTAAGAGTTGGTCTATGACGTCTTCTGAAGTCAATCGCCGGTTGATCGTTATGGCTA  
GACACTCACGAGTATATTCATCGATGATATTAAGCATCCGGAAAGCCCGGCCGTACGCGGTT  
CTGGCAGTGACAAAATCATAACTCCAGACATGATTCTTACGCTCCGGTCTTAGTCTGATGCA  
CGAACCGTCATTGAGCCATAGCCGACTCCGCTTGGGCTGCTTCTTGGGCACCCTGAGTCCCT  
CGGTACGCCAAATTCTCTCTACTCTTTTTATGGTTCACTCTCCAGCCTCTTTCATTGAGTAAAG  
CTGTGATTCGCCGATAACCATACTGCCGTA CTTACTAGCCAGTTCAATGATATCAGCCACC  
AGCCGTTTCTCCTCACCTGGTATTTCCCGGCTGCGGCGTTGAGTAGCTCTGGATTGATATAGT  
ACTTGGCATGCCCGCCTCTGGGAGACCTTGAGGTTACTCTGAATTCTCTCAATTATCTGCTGT  
CTCTTGTGCGGGCTTAGGAGTTTCCCCGTGCGGCCTCTTTCAAAATAGCTTTATCCAATGAGA  
GATCGGCTACAAGTTTCTTAAGGCGGGTGT TTTCCACTTCGAGTTCTTTGAGGCGTTTTGCT  
GCTCAATACGCATACCACCGTATTCTTGGCGCCAGCGGTAGTAGGTACAGTCACTGACTTCA  
ATCTTCTTTAGCATGACTGCAAGTGTAGTTCCCTGGCTGATGAGTATCTCAGCCTCGCGAAGC  
TTATTGATGATCTGTTCCGGTGTA AAAAGATTTCTGGGCATCTGATTTCCCTTTTTCTATTTT  
CCAGTCTAACATGAACTGGGCTCGTTTTCCGGGGG CAGGTCAGCCCAGACGTTCTAGAGCA  
GTTGGTTGATAAGGAAGAGATTGATTACCAGGAAAAAAGTGCGCGATATGGCCAGACCTTA  
GACAACGGCATCGAAGCCCAGAAATATGTATTGAAAAGAAATCCCAGTACTGGCTCGCTC  
TTCGTCAGTGGAGTCTCCCGATTCAACTCTTGAGCCGAAGGAATCGAGCATACTGGACGTT  
GCGTGTGACATGCCCCGAAGATTCCAAGCGAAAAGCAATGTCAGGTCTGATAGCGATCG  
AGAAGAAAGCTTTAGAGGAGGGTTTCCCTGGAGCTGTCTGAGATTACATACAAGGTAGATA  
CAACTCCTGAAA ACTGTACGCCAGAAAAAATCCGGCATAGACTGAGTACCCTCCTTTATGTT

GCTCTCAGGATATTAGCGAGAGATGGAAAATTACAGAGTGGTTTGACGGTTGATCAAATAG  
ATCAAATCTGGGAGAAACGGAACCCGTGGCTAGGTTACCTAGATCATGCTTCTGAAAAAGC  
CGACGAGTTTLAGGATAGTGGAAAGCTGAAATCAAAGAAATTCGTATCCGACTTCCTTCCGTGG  
TTTGGAATCAAATCGGAACGGAAGCACGCAGAATGCACATCAGGCACACCGAACTCGCTCG  
AAAATGGATTATCGAAGGTTTGAATAAATCTCGGCGATTATAGATTTTTAAGGCTTATGCTA  
TACTGAAAGCTAACTCGAAGGTTTTAGTTCTGTCTACCGTACAGTACCGCCCACCTTACTGG  
ACTCGAAACAGTATTTAGGAGATAATTGCAAAGTGGTGGAAAAAGTTCTACCTATTGATAC  
CTCAGCTCCACCATAAAGCTAAAAGCACCGCCGGTAGCCAAAAATGAATGCTTTCTTACCAT  
TTAACTACATCCGGTTCTCACGAATAGCCCCAAGCTAAAACCTACCATTAACTAATTTCAA  
AAACCTTTCCGGAAGGCTGAATGCCAATGGTTCAGGTTTTAACTTGATTAAATGGAGAGAGT  
TGTTGATAAGGCTGTAAACTGTGGAGTATATAAATAGGTGGAGTTTTGATTTCTACCCATTTA  
TATACTCCGGGTGCTTAAAAGCAAGAATTTATGTTCACTACAGTACACCGTACCCAGCATA  
TACTAACTCAAGGCCTCAAAACCTGTCAGTAGTGAAGCTATTGACTAACTCACACAGAAACA  
AATTATTACTGCACAAGGTCAGTTATTTGTTCTTGCGTTTCTCTATTTCTCTTCGACTTCCTT  
TGCTCCATCAGCGTAAAAATTCTCTTCGTCAGGGGCAAGTTCCTTAAAGAGTCTGAGAAATT  
CACCGGCGTGCACCTTTTCTTCATTGGCAATATCCCGGAGTACTTCTATGGCTAGCCTGTTGG  
TAGTGGATTTCGGCTAGTTGCATATAAAGCTGTATCGCTTCATATTCGGCTGCTACCATAAATC  
TTATCGCCCGTATAAGCTCTTCGTTACTTAGGGGTTGGCCTTTAGCCATTCCGGAAAAGGGTG  
ATCCAAACTCTGGCAT

>Dmc\_IME-OG49

ATGTGGGGTATCATTTTTGCAATAGTTGTTGCATCTGTTGTTACTTGGCTGGTTTTCTTGGGCTT  
TATCGCATAAAATTGCCATTAAATGGTTTGAATGGCTTTTGGCTGCAATAGGCCTGGTATTTT  
TAGGTGCAGCTTTTCAACATACTAGGAGAAGCATAACGAGGGTTTATACAAGGCAGCCTG  
GCTGGGTCTTCTGATAATGGGTGGTATAGGTGTTGTATTAATAGCTGTTACTATACAGAGTAT  
CCGGCGGAGAAACAACAGCCAAAACGGTTAATCTATTCTGAGCTTGCATATTTATTTGATAT  
GTAACCGGTAGTAAAACCTGTATCGTAGAGCCACAGTCCCAATATTAAGGTCTATACTCAGTT  
CTCTAGTTCATCAGAGTTCTGAGTATAGACCAAATTATTGTTTGTATGACCTGCCCTCCGAA  
AACGAGACCAGTTTCATGTTAGACTGGAAAATAAGTGGTAACTACTTAAAAAGTGGTATCAC  
TATCGGGGGCAGGTCATTTGAATTGAATAACCTAGATTAGCATGGCTGATGATTAGAGTAGG  
ATGACTAGGGTCTACTTCGAGTTTTCTTCGTAAGCGTAAACATATACTCTTAAACTGTTCGAC  
AGCGCCTGTGTAACCTTTCTCCCAGATTGTTTCTGAAAGGGTTTCATAACTCACGATATTTCC  
GGCGTTCTCTGCTAATTTCTTCAGGATAAGCCCTTCCGTAGTTGTCAAATATATCTCCCGTCC  
ATTGTATTGAACAGTACGATATGAATAGCTGAAATTTAAAGGACCATACTAACTGTTGAAT  
TACCTTGGACAGGGCCATTTCTGCGAAGTGTGCTTTCAATCTGGCTAGAAGTCCATCTGCC  
CGAATGGTTTACAAATATATTCATCAGCCCCGGCTTCAAGACCTCGAACGATATTGCTTTCTG  
CTGTGCGCACAGTCATTATGACTATAGGGATATTTGAGAAAGATCGAATTTGTTTTAAGACA  
TCAATACCATCAATATCGGGTAATCCTAAGTCAAGGAGAATCGCATCAGGGCTATCTTCTTC  
AACATGCTGTAGCCCCTTTGCCCACTATTTGTAGTAATTATTTGAGCGAATGGCCAGCCGAC  
TCTAAATGCTAACTGAATACATTCGGCAATCTCTTTATCATCTTCGATTATTAATATTTTCATT  
ATGTTAAATCTTTTTATTACAGATTTTCATGTTTTGTATATGGAATAAATAACTTAAAAATAC  
TCCCGCTAGGTTTATTATCTTCTATTTTTATTGTTCCCTCATGAAGCTCAATCAAATATTTGCA  
TAGAGCAAGCCCTAATCCTAATCCTCCCGCTTTGGTAGGATTCGCTTTCGAACGATAGTAAG  
ATTGAAATATTTTCTCCTTTTCGCTATGAGGAATACCAGTCCCATTATCCTCAACATGAATAT  
AAAGCTTAGATTCCCTGCAATATACCCTCATAATTATTTCCGCGCCTTCTGCAGTAAATTTAG  
ATGCGTTATCCAGTAAATTCAAGACTATTTGCCGGATTCTATCTGCATCAGCCCAGAGAGGT  
GGTAAATCCGGTGAAATGTATGTTCTGAATAGGTTCTTATTCAACAAAGTTCGTGATTTAAA

CTCAGACACGACTTCATTTAATACACTGCTTGGATTAATCCAATCATATTCTAGATTAAGGAT  
GCCTACTTCACTACGGATTAATCAAAATGTTTCATCTACACGATTATTGAGGTTATATGCGG  
CACGGAAGATATTTTGAGTCAGCAATATAGCAGTTTCATCTGTGACAATTTTAGTTAGTACTT  
TACTATTACATAAAATAGGAGTAAATGAAGTTTTAATTTTCATGAACTAAACCTCTAGCGAAT  
TCAATTCGCTGATGGATTTGATTTTGTAGTTCTTGTCTAAGTTGTAATTCCTTCTCATAGCTTA  
ATATAAGATCCTGCTCAAATTTTTTTCGTTTAGTGATATCATGGTGTATTCCAAAGCCAATCA  
ATCTGCCATTGAGTTAACCACATGTGAACTTAATTCAGTTGGAACCCGTCTGCCATTTTTTCG  
ATAAAAATGTTATTTTCGCGTATTATCTTTCTATCTGTCCCCGATTTTTGTGCGATCAATAAATTG  
TCTTGCAATTGTGATACAAATCTTCAGGGGTGATATCTATTGGTGAGAGACCGATCAATTCGT  
CATGTGTATATCCCAGCATGCTGCAGAATACATCGTTTACTTCAATGAATTGACCAAATGGA  
CCTTTTGAAAGGTCTATTACTAAACCATCATTAAACGAAATGAAAGAAATTAATACAGTA  
CGGGTGAAGTAATTCCTTTGGGGAATCCCTATTGATACCTATCTGCTTATTTACCAATTTATT  
GCCTTTATGCGATAAGTATTAAGAACAGTCGCAATATTGAGATCAATGTCAAATAACGCTAT  
TTATCCTCAATTATAACGCTAATATGTATGGTTCGAGACCCAATATATAGAAATTGTAACACC  
ATATTAATAAATTGTAATCAATATTTAGGCATTCTTTTATGAGGAAGAATTATATTTAGGCAT  
AGATTCAATTAAGGGAAAGGAGGATTGCCAATGATGAGAGCACATAAGGAATAGGTGCTTA  
CTAATGTCTACTATTA AAAAAGAGGAGACGAATTGTGTCTAATTTTCATTCCATTGTATCTAG  
AAGAGATTTTCATGAAAGCATTGGGCTTAGCTGGTGTCTGGCGGAGTAGGGGTCTTAGGAACG  
AGTCCTGTATTTACGACTTAGATGAGCTAGCTTCTTCAGGAAATGATATTCAAAAGCACCC  
ATGGTATGTAAAAGAACGAGAGTATGGTGATTCCACAACCCCAATCGATTGGCCAAATGTTG  
ATCGCTATGACAGAACTAGATTACCCTTGAGATCTACATTTGCAGATGAAGAGGAAAGGAA  
AGTCCTTATAGAATACGCCAGAAAGAAGACCCGGGTTGGGATCCTGGTCCGGAGGGTATT  
GGAGACATGCGAACGACTGCTCTTGGGGTAGGCGCTGGCATGTTTCGCTTTTGGGGTAATGAT  
TCATGATGATGGCAAGACCTCAAACCTTAATACCCTTCTTGGTTCGTCCTCCGTAATTCCTCT  
TCATGGAGAAACACCACGATGGGAAGGCACTCCAGAGGATAATCTTAAATTGCTCCGGGCA  
GCGGTTTCGTTTTTATGGTGGTAGTGAGGTTGGAGCAATTGACTTAGATGAAAATACCAAGAA  
ATTAATCTGGGAAAAGACTACTCCTGGAGAGACTTGTATTGGTACAGCAGCTTCGATGGGAC  
AAATACTTGATGGAGTTACGGGCCCTCTGCCACTTGTATTATGAAGATGTAGACCAGTCTTAT  
ATGGCCGATGACAAGCTCGTGATATCCAATAAATGTAAATGGGTTTTAACTTGGACATTCAG  
ACAACCTGAAGATATGGTTAGAAGGATGCAAGGTGTTACCGAAAATGCAGCAGTTTTTATAT  
CTTACTCGCGGATAGCGATTATCGAATTACGTATTCAAGCGTTCTTAAGAACGCTGGGTTAT  
CAAGGATTGGGGGGTGGTACAGGGGAGTGGGGGCCTTCCAGGTGCGTTTGCAACACTGACTG  
GCTTGGGAGAATTGGGTCGCGCTAGTTATATCATAACTCCCAAATATGGAATTTTCAGTAAGA  
GGCATGAATAGAATGCTTACCGATTTCCCACTAGCCCCAACAAAACCCATAGATGCTGGAAT  
GCGTAAGTTTTGTTATACCTGTGGCATTGTGTCTGATGCATGTCCATTTGGTGCAATACAAAC  
AGGGGATCCCTCTTTGAAGGATATAAACCTTGGATGAATAATGGCTACGAAGCTTGGCGTG  
TTAATTACGAAAATTGTACCCATTGCCCTGTCTGTCAAGGTACCTGTCTTTTAATGAACTTG  
GGGGAAGTATGCTCCATGGCATAATTAAGGGACAGTAGCAACCACACCAGTTTTTAATAGT  
TTCTTTAGAAACATGCATAAAGTATTTGACTACGGGCGTAAACCTACTAGAGACTGGTGGGA  
TCTCGATAACCAGCCTGAATGGGGTTTTGATTCAACCCGGTAATAAAAAATACTATAGGAGA  
TAAAACACTACTATGCCATTGATATTAGGTATATTTATAGGTGCCGGCATCGCGATATTGGTTTC  
ATGGCTCAGATCAAGAGCAATCAAAGTGAATGGTATGAATGGATTTTGGGAGTCATTGCG  
CTTTTTTCAGCGATTATTGGAGTCCAACATTACTTGGGTTCACTATCAATCGAAAATGAATCA  
ACTGCGGGATGGATGGGGCTGTTAGTATTTGAGGGGATTGCATTGATCTTGGTAGTTTTTCAG  
TTGGCAACTAGTTGCGAGGAGAGCCAAGAAGTCTTAAGCTAAATTTTCTAGATGTACTCAGG  
CGGGGGATAATTATCCCCGCTTATTTATTTCTGCTATTTTCGTTTACTGGGAGACTAGGGT  
TTATCAGATACCCAGACTCCAGTCCGGATTATTACGTTTCATATGGCTGCCTTATTAAGCTAG

AGGCATGTTTTTAGCTTTGGTGGAGACGGGGGATCATCGAACTCCTTGTTATTTTTATCCCTAT  
ATGAATTCAGGGTGATTTTCTGACAACCATTTTAGCACCACACTATGAATCTCTCGTGCCAA  
ATCAATCATTTCCTTAGTATCTTGTTCTGAAATCATCCCTGTCATCTCATATCCACTGATATTA  
CGTTTCTGCCGGAATTTATCAAATTTTCTTATCATGCTTGATCTAATGGTAAAATGAAAGCT  
GAGGCTTGAATTGTCCAATAATGGCTTCCTTCACCCGTGGTCCTGTAACCGCTGCTGACCAA  
AGCAATTCTGGCTATCGTGAGAGCAGCATTATACGCCGTAGAAAAATTTCTGTCTGTACTCA  
ATATCTCTATTTGGGCATCGGTTATGTCACGGTCAAAGACGGCTAAAAGCTGCTTTATCTCCT  
GTTTGCTTGGTGTATGTTCTTTTATTTCGTCGGTCATTTAGTAAGTTCTTCAAGTCCATGTGCGT  
CGCCTATAATAAAAAATTTTTTCACCCTCTAATACATTATTGATGAAATAATTATCCTTTCCGA  
TTTTTTGCCGAAATTCAGAGGTTGGATATACTACTGAGTTAATTTCCCGGTTGAGCTGTTTTT  
CTGCATCTGAGAGTAAGGTAACCGTATCTCCGAATGAGATATCTCCTATTACCACAATGTCT  
ATATCACTGGTTTTATCCTCATTGCCACTGGCAATAGAGCCAAATATAAATGCAACTTTAATT  
AGGCTAGCAGATGGTAATAGCGCACTGCGCAAGATGTCTGTCATGCCAAAAGTCTTGGTTAT  
AAGACTTTTCAACTCTTTAAATACCGGGTTCATCGGATTAGCCTGATAGTATACCTGCTGATT  
ATGTACTCTGCGCTGAATAATGCCAGAATCGGTAAGTTGTTTCAGCTCTCTCTGGACCGGCC  
CGACCCCAATATCTGTAATGCGAGCAATCTGACGTAGATAATATTCTTCGTCTGAATGACCG  
TAAAGTAAAGATAAAATGCCTCGTCTTGCTTTGCCGAAAAGGGTAGTTCCTATGATATCTTT  
ATTTCTTAATGTACTCATACTGGTTACAATTGTAACCTTATATGGTTACAAGATTCAAGCATT  
TATCAATGAAATCTTCAAGATTTGGGATTACCCAGTAGAATGAAGTTTTATAAAGCTGTAA  
GACATGATTTTGTCACTATATCTGATGCAGTATTCGTCACTTATTGTCGTTCTTGGCTTTAATA  
TAAAGCATATTTTATTGTAGTGCCAAGTAGTATAGGAAAAGGGGCATCCCTACCAGCAGCAA  
TACCTACTTGACAGGTGGTATCCCTGGCTGGGCAGGTTATAGCAAAAATCTTTAGGATGAGG  
CTGTAACCTGGAGCACTTCTAGACCGACTAACACACTAGTGTATATACTCGAAACGAATGGT  
AAAAGCTATTATTTTAGGAAAGCTTATGGAGGAAAAGGGGGAACGTGGATTGATATATTTTT  
TACCCTAAGTGGCTTCCTTTTCATTTGTCAAATAAACTCAATTTTGATATGATTAATAATATGA  
GTGCGTTACAAGACAAAAAAGCCAAACATGATATCTCACCAAATCAGGTTTGGGATGAAAT  
ATTGCTTTTACGGGCTGTTCTCTATCGTATTAGGGAATTAGAGCTCCGAAAAGTTGGTCTTAC  
TCCAGAACAAGCCGGAATAATTCATGCAGTCAAGCAGTCTCACAATCGAATTATACCTGCCC  
AGATTGCGCCGATTTCTCGGCGAAAACCTGAGACAATATCTCTGATCCTCAGAAGAATGGAA  
AAGAGTGGTCTCGTACGATTGATAAAAAGACCTTGATAAAAAGAATATGATCAGAGTCAAT  
TGACTGTTGTCGCTGAGCAAAAACCTCAAAGACGGAGTGGAAAATTTTGTTCAAACAGAAAA  
AGTCTTTGACGTTTTATCAGCGGAAGAGTTGAACGAATTTTCATATTTTCATTAGAAAGTTGG  
ATGCCCCTGCGATGCAAGTTTGAATGAAATTAAGACCGAACGGCTATGACATATACTCCTC  
TGTCCTTCTTAACGCTTTAGATTGAATCAGAATTGTTGTGGCGGAAAAGTCTTGGTAACTTGA  
TAGATTATTTCTGAATAAATCGTTATTTTATTAACCTCCTAATGAAGCAATTTCTCATGTGA  
TCTTCAATGACGAGGTCGTGTGAATTGCTTTAGTATAATTGCCTTCTAGAGTGATCTTATAAA  
AAGGGGAATCCGATTCTTTACGAGATTAAGAGATTACCACGGTCAAGCCTACGTGGATT  
GAAGGTAGGCGGTAATGTTTCGTATATCTCGATTGGATCATTTTAGAATTTTTCTAATATTCC  
TCCGGAATCATATAACAGCTTAGGGGCGAACGAGTGTGACTTGGTGAAGCAAGAGTGGAC  
TTGTTACAAGTCATTATGATTGCACAACTATAAGAGTTCATGACTAATAGCAGAATTGTCT  
TTAAAAGATCGAGTTATGAGCAGCACTTGCCTATTGACTTATACTTTGAGTAAGGTTGTTG  
AATAGTTGGATATAGCAGATTCAACTTTGACTGGGAACTGTGTTATTGTATTTACCTCA  
GATCCTCTCAATTTTTTATCTTAAAAGTGGTGGTCAATTTCCCAATTTATAATGTGCAAATCA  
TCACATTAATAGATGATGCACTTGAAGTTCATCGTAAAGCACAATTTGAACTGGGCATCCAC  
GCGATATTGTCGTGCATCAAGGGGATCATCATAGATTGGATATATACTAAGCTGATAGAAGG  
CGACAATCCTTGGAGTTAAGAACCGAAGACTAAGCGGTTTAGTAATCTGATTCTTCGAAGTT  
CATCAACCAGCCATGTCTTTAATCAAGTCGTTTCGATTAGACATGGCCTTTATTATTGGTGGTC

TAGCACTCTCACCTTTCAATAAATAGCTGGGTGATATTTACGAAGCTTTCTGGAATTGATATA  
CAAAAGAATACTAAATTTGGCCCTCGTTGCTCAAAGAAAAATGCAATTAATTTCT  
ACTTTTGTATATAGTGTCTGCATCATTTTCAATTTGGTTCGATTGGTAATCATTGTATTAATTGC  
ACAAAAGCCTGTTTCGGATCAGTAAATTGGTTCATTTTAGGTAAACAAGTTAATTATTCTA  
AACCTAGGAACCGTCCTGACAAAAATTTGTTTTTACCCAATTGACAGTTATTAAGATAATGA  
CTTACAATGTTTATATATAAACATTGTATATAAATAACCCCTGCTTTATGCACGGAGAACTTC  
TCCGCCAACTCCCTAGGTGTAAGAGGGGTTCTCTATGGCACGTGCCTTAATGAGGTGGAGGA  
AAACAGAATCAATAGTGAACAGATTAAGGAGGATTGAATGCCTTATTTCAATTCGTTTAGTTA  
TCTAAAAATGATTTACTAAGTTTCTTTTTACCAAGCCAAATCTGTGAAAGTATCTAAATGCA  
AAAAAATAAAAAGGAGCAAAGGAAATGTCAGCGTTTCATTCTACTGTAAGCAGAAAAGAAT  
TCATTAAGACTTTGGGTTGACCGGAGCAGGATTAGGTGCCTTGACAGCGGCAACTCCTATT  
TTTACGATCTGGACGAAGTAACATCCTCAAATTAGGAGTTGGTCTCAGCACCCCTGGTA  
TGTTAAAGAGAGAGAGATACTCGACCCACATGTGAGTTTGATTGGGATCAATACCAGCGTT  
TTGACAATTCTCCCGAGAATAGGTTGATAGGAATAGACACTTTGATGATCAGAGACCTTAAG  
TGGCTAGATGAACATCCTGTGCTTAAAGAAACCATCAGGCTGAAAGAGAGTGATGTAGACA  
CTACATGCGTACAAAAGAAGTTCCTAGCTATGACCACGATACAAGGGATGGCGCCATGTG  
GGCGGCTGGCATCGCTGGTATGCAGTATCCTATGTACGGTTCCTTTCTAGGACAGTTTACTAT  
GTCAGGAGCTTCAAAGCCAATTTACTTTATGAATCCGAATGAACTTACCCATCCGGGAGAAA  
TTTCTATCCACCCGGTGTGAAATTTGTGGAGACTCCGCCAACACGTATCCGAGATGGAAT  
GGGACGCCAGAAGAAAATCTTAAAACGCTTACGGCTGCTGTTAGACATTTTGGTGGTCAGGA  
AGTTGGCGTTGTGGAATTGAACGAGAAAACAAAGAAGTTCATTTACTCTAGAGACGATAGG  
CGACTAGGATCCTCTGCGACACGTGACATCGTATTTGAGGATGTTGATCTAGCTTATGAAAC  
CGATACCAAGAGTGTTATCCCAAACAAGTGCAATCGGGTGATAGTCTTTACGAACTTACAGC  
CAACCGAGATAACTCTTACCAAACCTGGTGGTATTAGTGGAAGCGCAGTGAGTTATAGCAGA  
ATGTTCAAGATGACTGTCGAAATGCATGCTTTTATACACGCCCTCGGTTATCAGCACATTGAT  
GGCTCTCATTGGGCGCTGTCACCATCCGTGCCATTCCGGTATTATGGCGGGTCTTGGTGAAGC  
CGGACGAACTGGTATGAGCATTATTTCTTATAAGTATGGCAACATGATTAGATGTGTAATC  
GAATAATCACCGATATGCCCTTGCCCTCTACTAAGCCCATAGACTCTGGAACATATCGATTTT  
GCCATACCTGTAAATTGTGCGCTGAAGCCTGCCCTTATAATGCTTTACCAATGGATACTGAA  
CCTCGCTGGGACACTGAATGGGAAGATGAAAATAAGATCCATAACTACATCGGTGGCTACA  
AGGCTTACAGAGCCTCGTTGCAAAGATGCCACGATGTAGAGCTTGTGAGGCAGTCTGTGTA  
TTCAATGCTAAAGACTCTGCATTTACGCATCAGTTGGTCAAGTCGATCCAGGCTACAAACCC  
AATGTTCAATACTTTTTTCCGAAATATGCATGAAAGTTTTGGATACGGAATGCAAAATCCGA  
ACGATTGGTGGGAGAAGAATTTACCATCTTATGGAGTTGATCCGGCATTCTGTACTAGTAT  
GAGCAAGAGTGAATACTTCCCAATGGGTTCCGTTGGATCCTTAAATTTTATTAAGGAGA  
TTAGAATGTGGTATATAAATTGGCCTTATGCTTGGCGCATTGGTATTGGGAGTTGTTTGGTTGT  
TGAAAGCTAAAAATCTAAATTTTAAATGGTATGAATGGGTTATAGGTATTATTGGTCTTGGT  
CTGCTTCTTTTACCATACAAACTTTCTTGGCAGTTTGGAGGAATTAGAACCCTCAAGCAGCC  
TATACATTCCTATTAATTACCGGTTTGGCGGCATTGATTTTGTCTGTGCTGGTTTGGCAATTA  
GCCATTCCGGAGAATTAGGAAAGCTTAA

>Dmc\_IME-vcrA

TACTTCGCCCGCCGGCTCGTCCGTGTTTCTGGTGGAGACGGGGGAGGGTTGGACTCTCCCTG  
AAACAATGGTGATGGGGTTTGCAGGATGTTAAGATGCAAAAATAACTGTAGTTTTTATTATT  
TAAAGTAACTCGTGTTTCGATATGTAGTAAATTAGCAAAGACTAGTACTTAAGTATTAATACT  
TAAGTACATTTATTTTATATATCTTTGCGTATTTTGTGCAATTGACACTATATAAAAATGCT  
AGAATACAAATAATCAACTGTGTATTTGTACTGAGGAAACGCTTATGGATATTTGGCGTTCA

GGAAAGACTGAATGGCTCTAGGGAAAGACCTAAATATATCTTTAGGATAAAATTTATGAGTA  
AATTTCATAAAAACGATTAGCCGCCGAGATTTTCATGAAAGGACTAGGATTAGCCGGGGGCGG  
TATTGGTGCTGCGGTGGCTGCCATGCCTGTTTTTCATGATCTTGATGAATTTGTTTTCAAGCGA  
AGCAAATTCTACTAAAGATCAACCTTGGTACGTTAAGCATCGAGAGCATTTTGACCCTACGA  
TTACAGTTGACTGGGATATTTTTGATAGATATGACGGGTATCAGCATAAGGGTGTCTATGAA  
GGCCCTCCAGATGCTCCCTTTACATCATGGGGCAATAGGCTTCAGACGAGAATGTCAGATGA  
AGAGCAAAGAAGCGAATTTTGGCCGCTAAAAAAGAGAGGTTCCCTGGTTGGGACGGTGGG  
TTACACGGGAGAGGGGATCAGCGGGCGGATGCACTATTTTACGCAGTAACTCAACCATTTCC  
TGGTAGTGGTGAGGAAGGGCACGGACTATTCCAACCTTATCCTGATCAACCCGGTAAGTTTT  
ACGCGAGATGGGGTTTTGTATGGTCCGCCACATGATTCAGCGCCACCTGATGGGAGCGTACCA  
AAATGGGAGGGTACTCCAGAAGACAATTTTCTAATGCTGAGGGCAGCTGCAAAAATATTTTGG  
TGCTGGTGGCGTTGGTGCTCTAACCTGGCAGATCCCAAATGCAAAAACTAATATATAAGA  
AAGCTCAGCCGATGACTCTAGGAAAAGGAACATACAGTGAAATAGGTGGACCAGGAATGAT  
CGATGCAAAAATTTATCCCAAGGTTCCCTGACCATGCCGTACCTATTAACTTTAAGGAAGCGG  
ATTATAGCTACTACAATGATGCAGAGTGGGTTATTCCAACAAAGTGTGAATCCATTTTCACT  
TTCACCCTACCTCAACCACAAGA ACTCAATAAGAGGACGGGTGGTATAGCAGGTGCTGGAC  
CATATACTGTATACAAAGATTTTCGCTAGGGTAGGC ACTTTAGTCCAATGTTTATTAAGAAT  
CTAGGTTATCACGCTTTATATTGGCCAATTGGATGGGGACCGGGTGGTTGCTTTACCACTTTT  
GACGGGCAAGGTGAACAGGGTAGAACAGGTGCTGCTATCCATTGGAAGTTTGGTTCTTACA  
ACGTGGTTCTGAAAGAGTAGTAACTGATTTACCGATAGCTCCTACCCCGCCAATTGATGCAG  
GTATGTTTGAGTTTTGCAAAACCTGTTATATATGCCGTGACGTTTGCCTCTCTGGGGGTGTGC  
ACCAAGAAGACGAACCAACTTGGGATTCAGGTAATTGGTGGAATGTACAAGGATATCTCGG  
CTACCGAACGGATTGGAGTGGTTGCCATAACCAGTGCGGTATGTGTCAATCCTCCTGCCCTT  
TTACTTATTTAGGTTTGGAAAATGCTTCATTAGTGCACAAAATAGTAAAAGGTGTTGTTGCTA  
ACACGACTGTTTTTAATAGTTTTTTTTACCAATATGGAGAAAGCATTAGGATATGGTGATTTAA  
CCATGGAAAATTCTAACTGGTGGAAAGAAGAAGGACCGATATACGGCTTTGATCCCGGTAC  
TTAGAAATAGATACTAAATTCGATAGAAAATAAAGGAAATTGAAATGGATGCTATATATTTT  
TTCTTAACAATTGCATTAGCAGTTGGACTAACTATGCTATTTACCTGGTTTTAAAAGAATAAT  
ATCACTTTAAAGTGAATGAGTGGGTACTTGGCATATTGGGGCTGTTACTAGCTTTGTTTGTCT  
ATTCAACACACATATGCCAGTGCTACATATGAATTTGAATATACGTCAGCATGGATAGTGGG  
CGTCATAGTGTTATTGTTAGCTGTAGTACCGTTGTTATTTGCGGCAAGATCAGTAAGACGCA  
GGGTAGACAAATAACGGGTATCTTTAAGTAGATAAGGTAGTAAGTTCGCTTGGGTTGCACGCT  
TAATAAAGCAATCAAGAGCTATTTCATAAAAAGTTAACCCCGAGTTGTATTACCCGTGGCAA  
CTCGGGGGATTATAGTTTTCTTTTATGTGCAAATATAACGAGAAAATGGATACAAATAGACA  
GTGAAGAAGTTTATTATTGCAATTATTGCGCTGGTCTTATTGGGCGCCGGCATATATGGAAA  
TACCGGCGGCGATCAAGATATTGATGCGTATCTAGCTGAAGCTTTACCTGAAGCGCAAGAGT  
TTTCTCTTTTGTCTTGAAGGTTTCGAACGGGGACA ACTATTTATATGGCGGATATGATGCTAATA  
TATTAGGTTATGTTGCTGTATCAGAAGGCTATGGTTATGGTGGCCCTCTTACGGTTGTTACAA  
CCTATAGTACAGATGGCACAATCGCAGCAATAACCGTTCCTAAAAACAAAGAGAGTGAAGT  
TTGGTTTGATAACCCTCTATCAATACGGATTCTTTGAACAATATATCGGGCTAAATTA CTGTGT  
ACCATTAACCCTTGGTGAAGATGTAGATGCAATATCAGGTGCCACCATATCTTCAAACGGCG  
TTGCTGTCGGTGTGCAAAACGGCAGACAGGTATTATCAGAATACTTGGGGAACCCTTATCCG  
CAGGAAAAAGAAAGCATCAACTTCGGATTTCGGAGAAATCTTACTTATAATTGGACTTTTAGG  
TACCATTGCGCTAAGAAATGTACCTATATTA AAAACGCATTA AATGGCGTTCGTTACATAACAC  
TTGGTTACGGACTGGTATTCTTAGGCATTATTCTTTCTCGCCCACTTAGCCTTACCAACTTCA  
CAACTTGGATCGTGGGAATAGCCCCACATCTACAGACTACTTTATTTATATATACTGGTTT  
TTAGCATATTAGGCATCGCTATCTTTTTTGGTAAAAATATATATTGCTTCTGGCTTTGTCCATT



TGCAGCCGTTCAAGAAGTTGCCTATTCAGTTGGGCGTGGCGGTATCAAGCCAAGCTCAAAAC  
TAAGTAAACGTCTAAAACCAGTAAGATATATTGTTTTATTGTTTGCAGTATTTATGGTACTAG  
CAACCGGTGACCCTTCAGTATCTGTTTTTGAACCATGGGCAACACTATTCGCAATGTCTGGTC  
CTGCCGTAGATTGGGTTCTTTTAATTGCCACGCTTTTATTAGTGCCCTTATCTATAACTTTTG  
GTGTTCTATTTGTGTCCGGTTGGGGCGGTAATGGATCTCACTTTGAAAGCGCGCAAGTTATT  
TCTTAGAACTTGGAGTAAAAGATTAATGCAAAACAAAATAGTTTTAGCAAAAAGATAT  
CTTTATAGTAATTGCAGTATTTATAGTATTCATTCTTAGTATTACTACAATCACCTCAAAGT  
ATTTTGACCATTTTGTGTTTGTATGAAAACAAGTGACTACAGTGAATTATCTTTCCTTTTTG  
CAAAATAAGATGAAGATATTCAAAACATTCTATTTATTATCTAAATTTCACTGCCTTTTCACC  
TTTACAAACCATATGGTTTCGGAAGACTCATTTTATAAGATTTTTGTTTCGTAGATTTTGCCTG  
ATTTAGGGGGTAGGGTTTCGGAAGGCGCTCCAAGCTTTAAATACGCTTAAACCATTTGATAA  
GCACACACTATTACGACAGGCTGATTATTCACCCATCTTTTTAAACTGTTCTTTCCTTCGCCC  
ACAAGCAGGACAAGTCCAACCTTTCAGGCAGATCCTCAAAGGGGTATTCGGCTCTATCCCAT  
GTGAAGGGTCACCACTCATGGGGCTATAACATTTCTCACAGAATCCACATTCATACGAGTTC  
TCCATATCTTCCCACGTACTTTTATTTTTCCTGCGTATCTCCTTAAATGCTAATTTTGTATTCTT  
AGAATCCTCCAAGGACGTAACGCTTCTATGATTTCAATACTCGTATGGGTTTCACTATCATC  
AAATTCTATGGCTCCCTTCTCATATTCAGAAGGGCATTAGCTTGTTTCATACGGGATTTCTCT  
ATCCATAAGGTTTCTTTTCAGTTTCCCGTAGGCATTGCAAATTCATGCTCTCCTCTCTCATGA  
TGCTTCTCCAATCACCTAAGATGTCTGGCGCCGCTTCTTTTGGAACACCCCATTTAATAAGC  
ATTAGAGTATCAAGACCTCTGGAGATGCCTTGCATATATCCACATTCGAGCTAACTGTTTG  
ATCGATATCAGTAGATTCATTGGCTTTGTTACAATATCTTCCAATTGTACGCTCAGAGATGGT  
AACCCCAAATTCCTTCTCCACCTCCAGAGCAATCGCACGTCTTATTGGTTTGGGCTTCCTGTT  
TGCACAATTGATAACGAACTGTACAATTTTCTCATCTCGGTGATTCCTTCTTTCATATAAAA  
CCTCCAAAGTGCCTAAAAGGCATGAAAAGGCATCCTTTTTACGTTTGAAAATGCCCTTTCGG  
CATGATGACGGCATCTGAAGTGCCGTGCTTATATTTAGTATACCAATTATCACCGGCATGCA  
CCCAGAGTGGATCTTATGATTGAACAATAACGAAATAAAAAACATCTACGCAAAGTAT  
CAGGACCGGACAAAACGGCTGGTACACTTCACTCTGTCCATTCCACAATGATCAGCATACC  
CCTAACCTGAGATTTACTGAGAAGGGGTTCTATTGCCTGGCTTGTTGGAGAAAAGGGAGATAC  
TCATAAACTAGCTGACAAATTGGGTATCGAATCAAACACCAGATCTACTATTAAGAAAAGTA  
TAGAAGTAGTCTACGACTATAGAGATGAGAGCGGAAAGCTCATCTTCCAAGTAGTTCGCTAT  
ACTCCCAAAGCCTTCAAACAGAGAAGACCTGATGGAAATGGTAGTTGGATCTATAATCTCAA  
AGGTATCAGTCCTGTTCTTTACCGACTTCCTGAACTGCTTAAGGCTCTACTTGATGAACTGGT  
CTTTATTGCTGAAGGGGAAAAGGGAGTTGAGTCACTTGCAGAACACGGTCTGACAGCTACCT  
GTTACCTATGGGGGCGGGTAAATGGAGAGATGAGTATTCTTACTACTTCACCTCCCGAAAA  
GTTGCCATTCTTCCAGATAATGATGAACCGGGCAGACACCATGCAAAGCAAATTGCCTCTTC  
TCTTTATTGATTGCTAAAGAAGTGAAGATAGTAAATCTACCTAACCTCTCTGAAAAGAAG  
ATATCTATGACTGGTTTGAAGGTAGTGAACCAAAGAGGAGCTCTTAGAACTTGTACTCAAT  
ACACTTCCCTATACGCCACCTGACCGAGTCGATCTTTCTTCTTCTTGTATGATATATCTGCCT  
TTATTAAGAGATATGTTGTACTCACGTCTGAACAATAAGTTGCCATTGTCTTATGGGTGGCGC  
ATACCTACCTGATAGGCCATGCTGATACTACTCCTTATCTTAATATCCATTCAGCTGAGAAAA  
GATCAGGCAAGACACGACTCTTGGAGGTGCTTGAGACGCTTGTATCCAACCCTTGGCCCACC  
GGAAGAGCAACCTCAGCGGTCCTGGCTCGTAAAATTGATGCAGAATGTCCGACACTGCTACT  
TGATGAGTCAGATGCCGCCTTTAAAGGCGAGAAGGAATACTCAGAAACACTCCGGGGGATA  
CTAAACAGCGGTTATCGCAGGGGAGGCAAGTCTTCTATATGTGTAGGGAAGGGTGCCGATA  
TCGGGTACAAAGACCTTTCAACTTTCTGTCCTAAGGCCATTGCCGGTATCGGCAAGCTTCCTT  
CTACCATTGCAGACAGGAGCATAACCCGTGCTTCTAAAGCGCAAGATAGAAGAGGAGAAGAC  
AGAAAAGTTCCGCTTGAGAAAGACGTGGAAGAAGCAGGGTCTTTAAGAGAACGCCTGGAG

CTATGTCTTAACTTAAAACCTTACAGACGAAGAGGTAGCCATTCCTGAAAACCTTGATGACAG  
GGCTGCTGACTGCTGTGAGCCACTGCTCGTTATCGCCTACTCTGCAGGGGAAGAATGGTTTG  
CTAAAGCAACGGAGTCACTTATTAACCTGATGACAGGTGAAGAAAGACAAGATGATTCGCT  
TAACGTGCAACTGTTATCAGATATAAGGGAGATACTGGAAAGTGAAGGGTTGGATAGGATA  
TCCTCCTCTGCTTAACTGACTCTCTCAAGTCCCAAGAGGAATCCCCCTGGAGCGAACATGG  
AGGTATTAACCTTTCTCAAAGAAAGCTCTCCAGGATGCTCAAACCCTATGGCATAAAAAGCA  
GATCAATCCGCTCCGGTGCAGATACTTACAAAGGGTATCAGAAAGACGATTTTAATGACGCT  
TTTAGCCGTTACCTGCCTACTTCCAGGGATTTAAACGTCCACATCCGTCACACCTAGCTTTGAG  
CCAAACGTAGAAGAAAGCCCCATTTTATCCGTCACAAACACTCCAAAAACGGTAAATGTGA  
CGGATAATCTCCAAAGCTACGCCAATCGTAATGTGACGGATGTGACGGATAAAAGTCGAAA  
CAAGAGGAAAAGAAGCTGTTTTCCGCTTCTTCCTTACTCCCTTTCTAAAGAGTGGAGAGAAG  
CTTTCGGCTTAGAAAAAGTGAAGGTAATTTGGGGTACTGAAACAGAAGAGGACCAAAGATG  
TGCAAAC TAGAACGTAAAGGGATAAGTAACACATGCGCCGCTGGTGTAAACAGAAAAGCACGG  
CACTTGACCAGAGTGCAAGACGCGGTTTAAACCCGACGGCGGCGCTCCAATCTCTAATAGTC  
AAACCCATTCCCTTTACAGCTGCCAAGAAGATCTTAGAGAAGCATCATTATCTGCACTCTAT  
GCCAGGCGGTACTAAGCTTGCCTTTGGAGTATTCCTCGGGGAGAGATTAGAAGGCGCCATCA  
CCTTCGGTTCAGGTCCGGCTAATGTCTATAAGATGGTTAGTAATGCTTCACCTTCTGATTGCC  
TGACTCTATCAAGGCTATGGCTTTCGGACTCTCTACCCTCCAACCTCGGAGTCAAGAACAATA  
GGGATAGCGTTAAGAGCCCTGAAGCGTTTTACCAAACCAAGTTTGTGGTCAGTTATGCTGA  
TCCGACTCAAGGACACCTTGGCACAATCTATCAGGCAACGGGTTGGGTATATACAGGCGTAT  
CCCTAGCTATGCCAATGTTTGATATAGGTGACGGGGTGGCGAGGCACTCAAGAAGCTTAAGC  
CATAACTTCGGAAGCCACTCGATTAACACTTTAACTCCCATGGAGTAAGGGTACGGGTAAT  
ACCTCAATCCCGTAAACATCGCTACTTTTACTTTCTGGATAAGGAATATAAGGGGAGGCTTA  
GGATAGAACCCAAGCCATACCCAAGAAGATTAAGGAGAACGACTAAATGAAGACTGTAG  
ACATTGAACTAGAAAGGCTTAAGGAAGCACCATGGAACCCCAACCGTATGGATGAAAAGGG  
CATCGAGAGGCTCAAGAACAGCCTTGAGAGGTACGGGTTGGTAGGACCTCTGGTGGTAAGA  
CCTATAGATAAATCCTACCACGAGGTACTGTCCGGCAACCAAAGGCTTAAGGTAAGGTAAGGA  
AACGGGTTGGGGGAGCGTACCCTGCATTGTCCTTAATCTTAACGATACCGAGGCGATGCTAC  
TGGCACAAGCACTTAATGACTTAAAGGGTGAAGATGACCAGGCGCTGAAAGGAGCACTCTT  
AAAGAAGGTGCTATCCGAGGTATCAGAAAGTGAAGTGCTTTCGATACTCCCGGAGACCGCA  
GGCAGTTTAACTCTTTATCCCAAATAGATGAAGGTGATCTGGCAAGCCACCTAAGGGCTTG  
GGAAGAGGCACAAAGCGCCAAGTTAAACCATATGCAGCTTCAGTTTACCCGCCCCAGCTTG  
ATCTGGTAAGGGAAGCGTTAAGTTCTATCATGCCGGTAGCTAAAGGGTCCAAGCAGGATAA  
CCCCAATACCAGGAGCACCGCCATCTTTTTACTGTGTAAGTTCTATCTTGATAGGAGGGATG  
AGAATGAATGACGTAAAGTGCCCGATATGTTCCAAACCATTATCTGTACGCATGGCAAGG  
GGAAGAAGGTCCAACAAGCCTTTTATACTGCTGGTTTGCCTGAGGATGGCAGGCATTTTAG  
AGCCTTTATATCGGACCAGGACTATATCGCCAAGGTGATAGCAGAGAAGGGTTTAGCTTAGA  
AAGGGTAGCGAGGGTGGTGAGGGCTCTTAAATCGGAAAAACATATGTATGTTGTTGTACAA  
CAGGGGAAAGGAGGAACTGGAAAATGAAAGATGATATGAGGGAGACACTGGAAAAAGCAA  
GAGAAATGATGAGAGCAAGGAATATCTTAGCAGTTTTTCAAACCTGCCTATGTTATGGCGCTT  
GAAGGGACAACCAGGGCTTCTGCCGGAGAGATATCGGCAAGAGAGAAAAAGGAATTTGAT  
ATGGATATAACACCCTCCAATGTAGGGCAGGCTTTTTGCGCTATCGGCATCAAATCAGTAGT  
TTCACACGGCAAGGTTAGATACGTACTTAACGTAAGTGAACCTGGAGAGAATCTGCAAGGCA  
GCTGAAGCCGAATGTGAAGAAATGGCAGATAGACTTGAGGACTCCCTTGAAACTTATGAAG  
ATTTGAATACCAGGGTACTTACGCTTCTTGACCGCCTTAAGGAAGTCTTTGATTTAACTGATG  
AAGAAGAGAGACTTGAAATGAAATTAAGGGGTTTTGAGGAAGAATAGTGAGAGCCGTAATC  
TACGCCAGGGTATCGATAACAGACAAAGTTGAAAAGCTTAATGATCAGTTAGAGTTATTAA

GGCGCTTTGTCAAAGAAAGGCGTTGGAAGGTCTATAAGGAATACTCTGATCAGGCACAAGC  
AGATAACTTAAGACAAAGAAAAGACTGGCAGAGGTTGCTGGAAGACGCAATTAACAAACGT  
TTTGATGTACTGATTATTCAGAGCATGGACAGAGCCTTTTATTAGTTACCCATGTCTCCATC  
TCTTTGGAGAAGTTTAGAGAATGGGGAGTTGGAGTAAAGTCAGTTTCTGATGCGTGGCTTGA  
TACTGTAACCTCCAAAGAGACCCCTTATGAAATCGCTGCTTCTTATGCCCGGTTAGAAAAAG  
AAATGATACATGAGCGTCTCATGCTGGGCATGGAGAGATCTCGAAAATTAGGCAGTAAAAC  
AGGCAGACCTAAGGTAATCGATAGGGAAGGCTTCTCTCAGGCTTATGGAGACATTTTGGAG  
GGGCTTAGCAAAGGAAACCTTTCAAGGAGTCAAGCTGCCAAGAACTCGGCATTGGTTATG  
CAACTTTGAAAAGACTTTTAGACGCTGAAAAAGTACTGGCGGAGTCTCTATAACATGGAAA  
ACGAAAACCTCAAGCAGGAAGAAAACCTCGTTGACGGGTATACAACAGAAGTATACAATGCC  
TGCCAATTCTTCCGAGGGTGAGGTTGACAACTAATGACACGCGAATTTATTAAGAATCTAG  
CCGAGGTATCAATAGCTGTTGCCCTCAAGGGACGTGAGGAAGGGGCGTGCTGATGAATGAGG  
CAAAGAGGGTAGTTGCATATCTTAGGGTATCTTACAGTATCACAGATAGATGGGTACTCGCTT  
GATGCTCAAGAACGTTTATTCAAAGAACTCTGCAAGAACAGAGGGTGGCAGATAATAAATA  
TCTACCGAGAAGAAGGAAGATCAGCCCATGTAGACAGCATCAATAAGCGTCCTGTATTTAG  
GAAGCTGCTTGATGATGTAAAGAAAGGGCAGTTCGATCTGGTTGTCGTTTCATACCTTGGATC  
GTTGGTCACGTAACCTTGAGGATAGCCCTTGAATCATTGGGGATACTAGGGGAATTTGGGGTA  
GGGTTGGTATCTGTTAGCGAAAGCAACATCGATTACTCTACACCCCAGGGAATGTTTCAAAT  
GCAGATGATGGGAGCCTTTGCTCAATACGGCAGTGAATCACTTAGTGTCCACGTTAAGAAAG  
GCATAGAACAAGGGCAGTGGAAAGGCAAACATAACGGCACTATCCCCTTTGGTTATGAGTC  
ATGTTGGGAAAAGAGTGAATAATGGTGAGAAGAGACGCCGTTGTAATCCCGAACACCCGGGA  
GGTATCCATATCCACCGAAAGGAAGGCAAGGCAGTCAAAGAATTATTCAAGCGTTATGCCA  
TAGGAACTGTTACCTTGTGCAATTGGCTAAATATCTTAACGATAGTGGTTTTAAGACCCGC  
AATACCAAGAAGATAGAGGATGCTTGTGGTAACCTCACTTCAGGACCAAAGCTCTTTACAGG  
GGCTTCAGTAAGGGGTATTCTGCATAATCCCTTCTATACGGGCAAGATAAAGCATAGAGACA  
AACTGCTTCCCGACTACATAAACCGCTAGTTACTAAGAAGCTCTTTAATATGGTTCAAGAT  
ACCATGAAGAAGAAGTCAAGGAAGATCAGAAACACTTCAATCTAAACCCCAAAGGGAATACC  
TGCTTAAAGGACTTGCCAGATGTGCCCTATTGCGGTATGCCGATGTGGGCTCAGACTTACCAT  
AACGGTAGGAAGTATTATAGAGAACATAAAGGCTCAAGAAGCATAGACCAATGTATCGCCC  
ATGGGGGTACCATCCCTTGTGAGATAGTAGATAAAGCAAATGATAGAACTGGTTAGTGCTATA  
GAGCTAAAAGGAACATGGCTTGAAGAGGTAATCTATTATTAGTCTAAAGGATGAAGTGA  
ATAGGGTAGCGAAAGAGAGGGAGCAGGTAACCTGTCAAACCTTAAGCGTATGGCTAGAGCTTA  
CATAGATGGTCTACTTCCCGATAGTGAATACTCACGCCAGAAGAAGCTTCTAGAACTAAATC  
TAGAATCGCTGGTAGTACCTGATTATAACGCCTCTGAGGAAGCAGGTAAGCTCATTATGAAT  
CTGCCGCTCTATGGAATAAGGCTACTTTATCTGAACAGAGGAAGCTACTTGTAAACATGCT  
TGATGCTGTATATATCGACTTTAAGAAGAGCAAATCTATTATTGCAGTGAAACCGAAACCAC  
CTTTTAAACCTATCTTTCAGGTAGCGGTATCTAAGAAGGAATCTAAGATACGTATTGTAAAT  
GAGCCATTCAGTAATAAACCAAACGGCTCGTCTTTGTTTCTGGTGGAGACGGGGGAGGGTCCG  
AACTCCCCGTCCAGAAAAGGTGACCCAGGATCTACTACAGGATTATCCGTCTATTTAATCTT  
GTCTGGCTAGCTTTTGGCGGCCTAATTTAGCCAAACCAGCCGATATTTCTTTCGTTCCCTCA  
TCGGCGTTGGGGAAACGGCACCTCAACTAATCGGCACCCAAACCTGACCCGTTGAGGTGGG  
GCCAAGCAGGATGTGCTGTCTTATTTAGCCAGCAAGAACGAGTTCACGTTCCAGTTGTTT  
TTTGCCACCTGTTTAAATGAGGTGGATGGCACCTCAGCCTGCAATCCAGTAGCCTACCTTCCCT  
GTCGAAACCACGCTCCCATAAAAATTGGTAACTAGCGGCGGAAATTGCGGTATTTGACCT  
CC

>Dmc\_IME-tceA

AATTATGATTTACGCATACAGGCGAGCAACCTGCTCTTAGCCCCGTTTTTCGGTGAATTTGGT  
GCTAATACCAAACAGCGGGATATCATGGTCCCACCAGCTATCCGGATTCTTCAGCCCATAACC  
CCATGGTGCCTCCATATTGGCAAAGAAACCATTTCAGGATACTGGTAGTAGTAACAGTTCCC  
ATGACAAAATTATGAATAGAAGCATCTCTGGTTGTGCTGAAAGGACAAACAGCATGGCACT  
GAGCACAGAAATAACACCTATAGTTATTCATATGCCAGGCTTTATGAGCATAAGGTACATCC  
AAAGCTCCGGGGCGCCATTCCGGGTCTACATCATAAACCGGGTCCGTATCCATAGATAGAGC  
ACCGGACGGGCAGCTTTCCGCGCATATTTTGTAGGTATAGCAGA ACTTATTAATACCGGCAT  
CAATAGGTTTTAGTGGGAGTTAGAGGCATGTCTGTAATCAGCATATCCATGCATACCAGTTGC  
ATACCATACTCAGGAGAACAAATAGTTGCCCCACGGGAATGTAATAGGTAAAGCCAGCCCC  
AATGTTGTAGGGTTCCTACCTTCCGGCACAAAGGTGTATGGAGAGGGTAGAGTAGTAGTTGG  
GCAGATTAAGGAAACACCTACTTTCCGCATCTTCTATAATTCAGGATTATCACGCCTGCCAA  
ATGCAATTTTCAGATGCAAGAAGTATGGATGAAATGGCATCTAAGGCCTGGAGTTATGTTAAA  
AGCGATAAATCTACCGGAGAAATATACCTGTATTTAAGCAATACGCCAAGTATATAGAAG  
ACGAAGCCTTGATGACTCCTGGCAGCCGGGCTATACCTGTACTGGATGACAGGGGTAAACC  
GGTAGTTTTAAACACTGTTCGGCCCGGATGGGAAGAAAATCAATGTTCCCTGCTACAAATGG  
TTACTCCGGACTGGTTCGAAAAAAGCCTGGAGATTACCAGAGCACTGGCCGGCAAAGCAGA  
TACGCTTAAACCTCGTCCACTCTCCAGGTAATAGGCAAAGTAGAATCGCTGCCAGAGGTA  
TGGATGAGGATTTTCATAGCATATATGCGTAAGAATCCTGATAATGTACTTTATGGCAGTACC  
GCTGAATATACATTCACCGGGGGCAGAAAGCCCGGGGATTTGGATATTCAGTCTCCTACCCC  
GGAAAAGACCGCTAATGATATTGCTGATATATCCCGCCGCTATACGGCGAATGATGTTAAGG  
TAAGTAAGGTATCTAGCCATTACACCGTATCCCAACTCAAAAATGGTTTTGTGGAAAAATATT  
GCTGACATATCTGAATTGGGCTGGAAAAAAGCCGATGCAGGATTCAAAGGCTGAATGCGC  
CTATCAATACAGTCAAGGTTGAAGGCATTACTATGGAAGCTCCAGTACTCAGCTTTACAGC  
TTATTGAACCGGACAGTGGTCAGCTTTGAAAAACAGGATCGCTTTACCGCTATGGTGAGCAA  
ACTGGGCGGCGAGCTTGATCTTGGCATTGGAGCCAAAGCCCCTACTCTGGCAGATTTGTATA  
AACTGAAGGCTCGCGGTATCTACAATACAGTCCGGGATATTTTTGTCCCGAACCTGCAAAAAG  
AAAATTA ACTATGAAGCCCTAACTAAATCTAATCCGGAGCTAGCGGGTAAGATTGAAAAGG  
TCTTTACCTCTGAAGCCGATACCCAAAAGGCTTTACTGGCTGAGATACGTGAAAAATCCCCA  
AACTGGCGGAGAACTGGAAGAGTTACTGGATGAAAGGAATATGTCCAACGCAGCCCGTT  
TAGAAGCTGCCCGGCAAATAGCTCCAGATCTAGTGCCTGAAGTAAGGGAATTATTGCGTGCT  
GAGCAGCAGTCAATAGCAGCTGCCCGATCAGCGGCCATGACAGCCGGAAAAGATGGACGTG  
CCAGTGCCTTAATCGTAGCCGGCAGGCTGACAAAAGCATTGATACCGAACGCAGACGGCTT  
GAGGGTGAAATAGAACGCCGGGCAAAAAGTTATCCAGCGTGAGTTACGAAA ACTGCCTGTGC  
GTATGCCTAATTTTTGGTGATATGAGCAAAAACCAAATACCAGCTAAAACACTGGAAAGGAA  
ACTGCACACTGGCGGAGGTGACTATACCAGCCTGCGCAGCCGGATACCGCCATCCAGAGGT  
GAAAGGGTGCCGCCACCGAGGGTTCCTACCCTAATCCACCGGATAACCCGCCCGCAGGG  
TTGACCCCTCAGCGCATTAAAGCCGCCAGATTTTGATTACAGGCACGAAAATAGAAGAAATGA  
CAGTGATGAAACCTCATCTACTGCCCGTCTAACTGAAAAACGGAGATGTAGCATGGAGA  
CAGGGGGCTTTGGGCAGTGGTGACGATCAGCGTCTGTCTGGTATATAAAGCGAGCCAATG  
GCAAGGTGGATATAGTTTTCCAGCCGCCTGAAGATGCCCCGAGACTGGAAGGAACTCCTGA  
AGAGACATTTTTACCAGAGGTA AAAAACC GCCCACTTACACAGAACATGGGCGTT  
ACCACAGCTAAAATAAATTTGAAGGACGACCCTGAAATTAAGTTTTGTCCAGACTAAGGCGC  
CGAAGTTTAAGCCATATATCCCAAAGAGTGTCCGGCGGTCTATAGGCATGTGATACTTTGTC  
ACAAATATTCCAGATATAGGATTATTGTGCATTGACTAATTAAGTCGTATGATATTGCTATG  
ATAAAAAGCATTAAAGAGACCATAGATTAGATAATTTCTGGAGCCAAGCTGAATTAGCGAAAC  
AAGCAGGTATAGGAGCGGATACGGTTAACAGACTTGAAAATGGTAAGCAAAAATCCAAGTTT  
TATTACTATCCGGAAACTAGCAAAGGCTCTTAATATTAACCAGAGGAAATTGAATTCTAAT

GTGGGATTTGATTGGCTGGGTATTTGTTGGAGTTTTAGCTTTATCTATAATTGCTGGCATATT  
ATCACTAGACACCAGAGGAAGGTCATTATTAGGACTAGTTTTAATTATTGCTGCTATCATTTG  
CATGATCACCGGAGTAGCTAATAGTTGGACGCCAATATTACTTTACTTCATAAGTGGATCAG  
CATTTATTATTTATAACTTGATTAATGGGGGCAGCTCCGGGATTATTACTGGCTATGGTGTA  
TGAAACAGACGAATTCCTCGGCCCATTTAATAATGACATTGAAATGAAGCTTTTTTCAGCCA  
CCTCATTATCTTCCTGGCGGGTGGCAAATCTTCTGGATACCGGCTAAAGATCCTCTTAAAGCT  
ACCAAATCATCCGCAAGTGGGTTAAAGACGCTGAAAAAGTTCTGCGTAAAGACCCTAAAT  
ATAAAGACAGAATGCCAAAATAAGATAAATGTGGTGCTTTAAAATGCAGTTTCTAAATATTA  
TCGGGCTCGTAGTATCTTTAATTGGTACTATACTCTTATATAAATATGGCGTTTCCTATAGAA  
GAAATGAGTTAGGGGCACCTTCAAATAGATGAACCCACTCCGAAATTTTTATTATTGAGCTA  
ACTTTGGAATTTAGGCAGAAATCAGGTTTCTTTTTATTAGCTGGCGGTTTTTTAATTCAAATA  
GTAGCACAGTTCCCTAAGCAATAAATAAGAGATGATGTAGCTATAAATCACCTAGGTA AAAA  
TATCGCATTGGTGCACGATAAGTAAGGAGGCCGAGTAAAATACTCGGCCTCCTTTGCACTAT  
ATCCAAACGTATTTAAAATTTGGGGGATAAACCAATAGGTGATTATATATGAAATACATAT  
ACCAGATACTATTACCTTTAGCACATGCTCACCCCTTTATTCTAAATCTGTAATCTAACTCT  
TGTATTATTATACCACTAGTTTTATTACAACCTTTAGGTTATCAACCGGGCTTACTTTTTTATGC  
ACTCTCATCATATCTTCAGTTCCAAGAGTGCTAGTATAACGCCTGGTCATGGCAAGGGTAGT  
ATGCCCAGCATTATCTGCAAGGTAACTCATCTCCCCATTACGTAGATAATTAATAGCAG  
CTGTATGACGAAACGTATGCGGTCCCGGTTTAGCATCGATGATATTAGCTCTATAGCAAATG  
TTTGTGGTGAGTGGTGGCGTGGTTATAGGACTGGCCATGCTCTTTATCGGTGTGGTTAGTAAC  
ATTGTGGGTTCTGTTATGAAGATATTCTAAGTAAATATAAATACCTTTTTATATACTTGTATGG  
AAATTGACCTTACCCCCGAAAACAGCTACACGATGACTTAGAGTCTTCTGGTAAAATAAAAA  
CACCAGGAGGACTCATGAAAGCCAGAAAATACACTGAAGAACAGATCATCGCCGTAATGAA  
GGAAGGCGAAGCCGGCGCTAAGGTAGCCGATCTCTGTGCGAAACATGGTATGAGCGAGGCT  
ACTTACTACAATTGGAAGGCGAAGTACGCCGGGATGACCGTCAGCGATCTGAAACGGTTGA  
AATCGTTGGAAGCCGAAAACCGTCGTCTTAAGCAGCTTGTAGCCGACCAGGCGCTGGATAAT  
CTGGCGCTGAAGGAACTGCTCTCAAAAACTTCTGACGCCCGAGGTTAAGCGGCAAGCGGT  
CTCTCATGTCAGGGAGAACCTTGGGCTAAGTATCAGAAGAGCTTGCCTGTTGGTTAATATAT  
CAACGTCGGTCTATCAATACCGACCGAAACCGGATAATGACGCTATGGTGCCTAAGCGGCT  
GCGTGAACCTGGCGGAGCAACGAAAGAGGTTTGGCAGCCCTCGACTGCACATATTGTTGAAA  
CGGGAAAGATTAGTTGTAATCATAAGCGTACAGAACGGTTATACCGTGAGGAAGGGTTGG  
CATTAAAGAAAGAAACGGAAAAGGAAAGGATCCGCCGGATTACGTATTGTATTACCTTCACC  
GCGTCGGACGAACGAGAGATGGTCGATGGATTTTGTAAACAGACAGTATTATTACCGGCAGA  
CGTTTCCGGGCGCTTACCATCGTTGATAACTACACGCGGGAATGTCCGGCGATAGAGGTGGA  
TACGTCACTGGGAGGCCGAGAGTAGCGGGAGTACTTGACCGGCTATCAGAAACGAGGGGA  
CTGCCTGAAAGCATCACGGTTGACAATGGTCCGGAATTTGCCGGACGTGCCTTGGATGAATG  
GGCATATCGCAAAGGAGTAAGGCTGAACTTCATAAGACCCGAAACCTATTGAAAACGCGT  
ATATCGAGAGTTTCAATGGGAGATTACGGGATGAGTGCTTGAATACGAACTGGTTTCTCAGC  
TTGGACCATGCCCGTAGTGTTATCGAAGAGTGGCGGAGAGACTACAACGAAGTCAGACCGC  
ACAGCGCATTGAACGGAACCTACGCCAAAGGAGTATGCTAATATAACTGCGAAGGCTCTAAT  
GCAGGGTGCCTAATTCGGGGTAAGGTCAAATAGGCATTATAATACCTTATCGCTTAATA  
AAGAGTAGATCAGATGCCGAGAGATAAAAATGAAGGGAAGATCTTAGAACAGGTTAAAGT  
AGATCATCATAAGATAGCCATCGCAAAGCATTATTTTTAGGTATACCCAGAAATAACGAGT  
ATAATCCAGAAGACATCTGTAAACAATTTTTACAGCAGCAACATGCCGAACAACCCGGAGA  
AGTAATAATACATCCTTCGTTCACTGAAACTGATGTTTTAGTTAAGGAAGTGGCAGAAAGTT  
TAAGTTTTACCTTGCTTTTCACGAAGCGTTAAACGCGTTAATTTATTCTGGAATAGTTATGC  
CTACTAGTTCCTATCGCACTGAAGGTTTCCATCAGGCGTGGACTACTGTGTACCAAAGGGC

GGGGGGCATTCTGGGGGATGGAGTTTCGATGAGTACCGATATACATTTCCAAACCGTTTTAT  
CTTCTCGGTCTCCAGCAGAACTAATGATGACTTTGCCCTAATGGATGCAGATCTTTATCTGTT  
AGAAGCGGGAGTTGCCGGGGCTGACGAAGAAATTATTGAAGCTATCAAAGATTCTATCGCT  
TGCTTTAAAGGAAATTTATACAGACCCGCAGTTGTAATGCTTGGAAAAGCCATGGAAGGCGC  
ATGGTTAGAACTTGGGGTTTCCATCATGCAATACATGGTTAAGCTCGGATCCAAGAGTGAAG  
AAGACGTTGCACGTTTTAAAGCAAGTGATAAGCCAATTACAATTATGAGTAAAATCAGCAA  
GATAGTTGAAATGTACAATAGAAAAGAATTA AAAACTGTGAGAGACAAA ACTGGAATTTCA  
AACGGTGCGTTAAATAGTATTATGGTTTGGTCCGATATTCTGCGTGACTCTAGAAATGCGAT  
TCACTTCTCGGTAAACCAACTACCAACACATATGAAAAAGTAGCCATTCTACTAATTG  
CGGCTTCAAATATTTTTAAAAGCATGTATTGTATTA AAAAGGCAACCGATGAAGAAGTAATA  
TAATATACTGCTTGGTACAGGCAGATTCTCCTTCACAAACCAATTGGTTTGTGAGCCCCTCTT  
TTTTGCCTGGTGTTTATTCGTAAATATTGCTTGATTTTGAGGGTAGGGTTTGTGAAGGTAATT  
TCTGGCTATTAATGGGGAGACGGGGGAGAGTTGGTCTCTCCCTTAAGCAATGGTGATGGGGT  
TTGCTGCAGTTTAGAGAAAGCTAATGCCTGACATGCGAACATGGTAATCATTACATTATGC  
CTTATATCCAAAAGCATATCCCAAATTTCTTGCTTCTTTTCATCACTTAAGTCTTTACAAAA  
TAGTTACAAGCATCTGTTGCTTTTTGATAACCTTCTAAAACATCCTGCCAATCCCCCGGTGGG  
TTATCTGCGATACTATAATAAGTTTTCTTACCCTTTTTTACTTTCTTTAGGTAGCCTTTGTTAT  
ATATATTAGAGAATAAATGCAAGACATTCTCAGTGCTTAAACCAGTTGCCCTGCATGCGTCA  
ATGATTCCGATTTCTTCTCTAAAATATACTTCCATAAGTAAACTGCTCTCATTCCGGTGTTAGG  
TTTTCACTATACTCACCCATAGTATATTTGTAGTTTCGCATTGCTATGGTTCCAATAAGTGTT  
ATTATACTCATTAATGAGAGATTTACATACTCTTCCCCGTAGGTATTAATTCTATCTTCTCCTGC  
TGCTTAATGTTATTTAAATCCATATCACGCTCGTTTCCCATTTTTTACTCACGTCCCTCCCAAT  
CTAATTCTCCAACTAACTCGTTTTGTGACTATTATATTCTAATTTAATAAATTTTCAATAAAA  
GTTTTAGTAAACTTTTAATATTGTTTTTTCATTCTTTCGTGGCACGTGCGCTTTCCAAGGTGCT  
ATCTTCTACTTAACAAACCTTCCCGTTGAGTAAACATTTCAAGGAGGCATGTTATGGATACTT  
GGCTTGCGGACTACCGCATGACAGACGCCAAAGTGCGAAAAGCTTTTTTTAAATGAGGTATT  
TTAAAAGTATGAGTGAAAAATATCATTCTACAGTCACAAGGCGTGATTTTCATGAAGAGATTA  
GGTTTGGCAGGAGCCGGTGCGGGGGCACTGGGTGCCGCAGTACTTGCAGAGAATAACCTGC  
CGCATGAGTTTAAAGATGTTGATGACCTGCTGTCAGCAGGTAAAGCTTTAGAGGGTGACCAC  
GCTAATAAAGTAAACAATCATCCATGGTGGGTTACCACGCGTGATCATGAGGATCCAACCTG  
TAATATAGATTGGAGCCTTATAAAAAGATACAGCGGTTGGAACAACCAGGGAGCATACTTC  
TTACCTGAGGATTACCTGTCTCCAACCTATACAGGTAGAAGACATACCATTGTTGATTCAAA  
ACTAGAAATAGAATTACAGGGTAAAAAATACCGTGATAGTGCCTTTATAAAAATCAGGCATA  
GACTGGATGAAGGAAAATATTGATCCAGATTATGACCCTGGTGAACCTGGGCTATGGCGACC  
GCAGGGAAGATGCCCTAATATATGCCGCCACGAATGGCTCACATAATTGCTGGGAGAACCC  
GCTTTATGGACGCTATGAAGGTTCTAGGCCTTATCTCTCTATGCGAACCATGAATGGAATAA  
ACGGCTTGATGAATTTGGTCACGCAGATATCAAACCACCAACTACCCGAAGTGGGAGGG  
TACGCCTGAAGAGAACCTGTTAATCATGCGCACCGCCGCGGCTACTTCGGGGCTTCTCCG  
TTGGCGCCATTAAGATAACGGATAACGTGAAGAAAATCTTCTATGCCAAAGTCCAGCCCTTT  
TGCCTCGGGCCTTGGTATACGATTACAAATATGGCTGAATACATTGAATATCCGGTCCCAGT  
AGATAATTATGCCATACCCATTGTGTTTGAAGATATCCCTGCAGACCAGGGGCATTACAGCT  
ACAAACGCTTTGGCGGTGATGATAAGATAGCAGTACCCAATGCACTGGATAACATCTTACC  
TATACCATCATGCTCCCTGAGAAGCGCTTTAAATATGCACACTCTATACCTATGGACCCATG  
CTCTTGATTGCCTATCCCCTCTTTACAGAGGTTGAGGCACGCATTCAGCAATTCATTGCAGG  
CCTTGGCTATAACTCGATGGGTGGTGGAGTTGAAGCTTGGGGTCCGGGCAGTGCCTTCGGCA  
ACTTAAGTGGCCTTGGGGAACAATCACGCGTATCAAGCATTATTGAGCCCCGCTACGGTTCC  
AACACCAAGGGTTCCTAAGGATGCTTACCGACCTGCCTCTTGCCCCACCAAGCCTATAGA

TGCCGGTATCCGCGAGTTCTGTAAGACCTGCGGCATCTGTGCCGAGCATTGTCCTACCCAAG  
CTATCTCGCATGAAGGGCCGCGCTATGACTCACCACACTGGGATTGCGTAAGCGGTTATGAG  
GGCTGGCACCTTGACTATCACAAATGCATTA ACTGTACCATCTGTGAGGCCGTCTGCCCTTC  
TTC ACTATGAGCAATAACTCCTGGGTGCACAACTTGGTCAAGTCCACTGTTGCCACTACGCC  
CGTTTTTAACGGTTTCTTTAAGAATATGGAAGGAGCCTTCGGCTACGGCCCCGCGCTACTCAC  
CAAGCAGGGATGAATGGTGGGCCTCAGAAAACCCAATACGCGGCGCAAGCGTAGATATTTT  
TTAAGAGAAAGGATGGAATAGATTATTATGGGTGGTGCTTTATACTACTTTTTAGTCGGTAT  
GCTTATTGGCGGTGCCGCAATATGGTTTATTACCTATACCCAGTTTAAGAATATAAGTTTTAA  
ATGGTGGGAATGGTCCCTTATGGCGCTAAGCCTGCTTTTGGTATCCTCTATCTTCCAGCATAT  
GTATTCTTCTATGAGCGTGGAGATGGAGTATCAGAGTGCCTTTATGTACCTTGGCGTCTTTGG  
CACACTGGCTGTCATCTTAAACCTTATTGTATGGCGCACATATAGCGGCAGGAAGGAATAAA  
ATCTTTTGATCCGCAATGTTGAAAGGGGAGTTGTTAACTCCCCTTTTTCTTTTGCCCCTGT  
ACACACGATTATAGCTCAGCGATGCTAAGTATCTATCGAGGCATATATACACATTAGACGAG  
GAGTTGGGGGTAACGCAGAGGGGCTGAACTCCCCGTCTAAAATCTAAAGTGTCTCTAAAAGT  
GCCGAAAACATCTCAGTTTGAATCGTAAAGGTGTCTTCTACTGCCAAAAGGGTATCTCAAGC  
GGCACCTTAAGGGGATCATTTTTAATGGCAGAAAAATGATCCCCTGACTCTTTTTGTTTATGG  
TATAATATGCGCCTTCATATCACAAATCAGACTCGAATAATATGTAATTAGAACTCATTTA  
ATTATCCTCCTATACCTTTCCAGTGGTAGCTCCAAAAAAGTAAAAAATTCTTGATATACCCA  
AAGGTGTTTTTATAATAAAACAATTTCAAGAATATGCGTGT CATAATTAACGTTCTCCAAA  
CCTTCTCCATAATTTGGTCCACTTTTATAGAGGATGCTATCTCGTTTTTTGCCTATTACCCGT  
CGTATTTCTAATACCAGAGGATGCGCACGTATCTTAAGCCATAACGGATCATCTTTGGAAAC  
AAGGGTGT AATCCAGTTTAAAGATATTCCTCATTTCTGCCCTCCATATTTTTGAATTGTTA  
TAGTAATATAGAAAATCATCAATCTTCATACCGCCATTAATCCGGGAGACTGCCTGATCCCA  
AAGCCCTTGGCATTATTTCTTCATAGGGCAGTTGTACACCCTGCGGGCCCCGCTGCACTTTTC  
AACTTGTTCAATAAGCCCGGCAAAAAGGGGGT CATGCAGATCATCAAGGGCAATATTAAT  
TCCATCAACGCTTTTTCTGGCTTTTGCCGCAAGTACCATATCTTTATCGCCTCCTAACCCACAG  
AAGAATCATCTGGATGATAAAGCTAGCGGTA AACATACGACGAACCAAATGTTATAACCT  
GCCAATAAGGAAACAAGCGCAGCCCCCAATAGGAAATAGATCACCCCAAACATATAAAGCA  
TTTTCTTTGTTAAAAACATCAGCCACCTCGCTTGATTTGGTTATAAACATAGCCCGGGGTTAC  
TTTTACCCCGGTTTGCTCGGTTAAAAGCCGGGCTGCCCTGGTATAATTCATTTCCACGCGATT  
GAACGCTTCCAAAACTTTTGTGAAGTCGATACTCTTTCTCGGCCGACCGATTGCTTTGCCTGA  
TTTGGTGCCATTCTCTTTTG CATAAGCAATTCGGGCATTA ACTCTTTGTCTTATAGTTGATTGC  
TCCAGTTCTGCGGCCGCGTCATTATGGAGAAAACAAAATTCCCATTGGAGTAGTGGTATC  
AATGCCGGAGTCCATATAAGATTTAAAACCGACATTATAGCTATTAAGCATCTGCATGGAAT  
TTACGGCATGGATCACAGATCTAAAAGCTCGGTCAAGTTTCCAGACAAGCAGAACATTGAA  
CTTTTTCAGTTGGGCCTCCTTCATCAGCGCCGTCCAAGCCTTGCGCCCCGTA AAAATCTGATGC  
AGAAGCCTCATCTGTATATTCCCGGTAGATTTCCAACCATTGTGCGGCACAGTATTTACGAA  
GCGCTGCGAGCTGCAGCTCCGGGTTTTGCTCTTTGTCTTTAGTTGATACCCTGGCGTATAGAG  
CTACTTTCATTTAGTTGCTCCTTGCTTTTCGTTGGTCCATGATGGAAAACAAAACGCCTACCG  
ATCCGTCCACACCTAGCGTTTCACCCCCTGATAGAAGCATCTCCAGTACCTTTGGCCTATATT  
CTTCTTGACGCCAACTCTTTAACGCATGCCGACATGGTTTCCGACATTGCCATCACTACGC  
CGAGTTTTTTGTTTCTCGACATCCGGGCTATTCAACATTTCCCTAACAGTATTGCTTATCATTGC  
CTTAGTCTTCTCCTTTTTTATTCAAACCTAGTTTCTCAAGCCATGCATTGGATACTTCATTTGA  
CACAATGGCTGCACGCCGAATAAAAACAACAGAGCAAGCCAAAATCGCAACTAAGCTGGAA  
ACAGGAAGGAGTTTTAGTATGAATAGCTCTGCTCCGGTTTTTTGCGTTAAGTAACTCTGCTAGT  
TTTTCTATGTATTCAGGGAAGAATAGAAGCGGCGGTGCAAATATCCCCCGGCCATGCATAG  
AGTGAGGAATGCCATCACAATGGTTGGAAAGAGAATAACTAGATTTTTTAATTATTGTTTTAA

GGATTTTAACCGGTAAACTGTCATTTTGTGCCTTATTGTCCATTTTCAGTCTCCTAACATTTT  
GTTTTTCAGTGGTCTCTTATAGTTTTTAGTGTAGAAGTGTAGAATTTAATTACTTTTTAGCTTT  
ACTTTACGTTTACTACACTACTTCTACACCTTTTTGTTATTTTTACTGTTTTAGCTTTAAACGC  
TCTACGCTATCTCTACACCAACTCTACACTTCTCTCTACACTTTTCTACACCTTTTTTAAAAA  
AGTGTAGAGTACGTAAGTTACGTTTGGAAAAAACATCATTCTACACCTCTACACCTTTTACA  
ACATAAGAGGGGCCCGCGCGGAAAAAGCGTTATTTTCATCATTATTTTCTCTTTCATTTAATA  
ATACTTTCCTAAGCTTGAGTACTCTTTTTTGTCCATTGGCTATACAGACATTATGAGTAGCTA  
TTTTTTGACTGGGGCAGTCTATATAACCCATTCTTCTCAAATCTTTTATAACCGCATTTGATTT  
GATAGTGTAGGGTTCATCAGTGCACGCAATGATCTTTAACCGCTTTATATGCAGTTTGGC  
CAAGTATAAGGACATGTCCGTTTTGCTGATCATTCCACCCAACCAGTGTGTGTGCCGGGCC  
ACTTGCCTTATACAGTCATCATTCCATCGCCAAGTATCGCGGATCCTGATTCTTTTAGTGAA  
TTAAGTATCTCAATAAAACGTTTTGCCGGCCGCTCTTCTTCAACTCTAGATCCTTGGTCTGTT  
GCTTGTGAAATAAATGCACTCATCCCTTCTTCCCAAACCTCGTTAGACTCCTCAAGGGTGAG  
GGCTCCGCATTCCACTGCAAAATCAAGCCATACTTAAGCCCTAAGCAAAGTAGAGCAATA  
ACCTCAGGCAACCGTGCATGAAGGCCTTTATTCATAACTTGACCCCTTAACGCCAAAAAATC  
ATCCGGGATGGATTTCTTAATAGAATCCATTTACCTGAAAGCCAAGTTAAGTAGTGGGCCA  
TTGCCTGGCGATAATACGGGGTGTGTGCTGCGCGGTAGTTAAGTTATTGATATCTATATCCT  
CACGTTCCAGCTCTACCGTGTAGAGCCTGGCAGTGTGGCTGTGGCCGGAAGGCAGTTGCTCC  
CCTGATGTAATGAGCATAACCGCGGGGAATATAGCTCGGGCGGGCAGATGTATCAGATCTTA  
AGCGCCCTTTGCCCTGGCGGTTGCCCTGGGCCCTGACAATACGCTCCGCTCTTGTTCAGCT  
GGCGGGCTTTTCCCGCGTCTGCCCCGGTGCCCAGTCATCAATAAGAAGAGGGGCATCCTTG  
CATAAGAACATCAGCTTTTCTAAAGCATTATCGGTATCAACCCAAGAAGCAGGGATATGCCG  
GGAATCAAAGTCTCCGAAGTGGCAAAGGGCCAAACTGGTGAGGGTAGACTTAAAACCTGCCG  
AGTCCGATTTGCAACAGACGATGATGACGACTTTTTGTCTTAAGAAAGGACGGTAAACCAA  
TGACAACGATTTTACTAAACATCCTTTTAGGATTGTACTIONTGTGTGTACGTTCCCTGA  
TCTCAATGATTCAGAGCATTTCGAGGCGATCGCAAGAGGGCAAACGTGACGAAGAGCGCGA  
AGCTCGTGATAAAGAGTATCACGAAAAACGAATGCGGGACTTCAAGTAAAAACTGTGGACG  
GCGGTAGAGAAATCTTTACCGCCTTTCCTTATAAAAGGATGGTCAACTATGAAATCACTCT  
CAATAGATATTGAAACCTATAGCAGCGCCAATCTAGCCAAATCAGGTGTATACCGCTATGTC  
GAATCACCAGATTTTCGAGATACTGCTTTTCGGTTATAGCGTCGACGGCGGGCAGGTTCCAGG  
CGTTGACCTTACCAGCGGGGAGAAGCTGCCCAGCGATGTTATCACCGCACTCACGGATGAA  
ACGGTGATCAAGTGGGCATTCAACGCAAACCTTTGAACGGATCTGCCTGTCTCGCTTTCTTGG  
ACTCCCACCGGCAAATACATCAACCCTGCCTCATGGAAATGTTCAATGGTATGGGCAGCGA  
CGATGGGGCTGCCTCTGTGCTGGAAGGCGTCCGCTCGGTACTTAAGCTGGACAAGCAGAA  
ACTCACCGAAGGTAAGGATCTCATCAAATACTTCAGCCAGCCTTGTGCTCCAACGAAATCCA  
ATGGACAGCGCACCCGGAATCACCTCTATCACGCACCCGATAAATGGTCCGCATTTAAGAA  
ATATAACATCCGTGATATTGAAACTGAAATGTCCATTCAAGAAAAGCTCACCAGGTTCCCGG  
TTCAGGATAGTATCTGGGACGAATACCACCTCGACCAGGAGATCAATGACCGAGGTGTGGC  
GCTGGATATGACACTGGTCCAAGAGGCTATCGCAATGGATGGTTCGCTCCCGTTCAGAGCTCA  
CAACCGCGATGAAGCATCTGACGGAGCTGGACAATCCGAACCTCCGTACAGCAGATGAAGCA  
ATGGCTTGCCGACAATGGCATGGAGACCGACACGCTTGGAAAAAAGATTGTCGCCGAGTTA  
CTCAAAACAGCACCTCTGGATCTTGCAGACGTTCTATCGCTCAGGCAGCAGCTTGCCAAGTC  
ATCGGTTTCGTAAGTATCAGGCAATGGAGAATGCGGTCTGTACCGATGGTCCGCGCCCGTGGGA  
TGTTTCAATTTTTTGGTGCCTCGGACCGGGCGCTGGGCAGGCAGGCTTATTCAAATGCAA  
AACCTCCCTCAGAACCATCTGGAGGACTTGGCCGAAGCGCGTGCCCTTGTGCGTTTCGGTGA  
TTTTGATGCACTTGAATGCTGTACGAGGATGTGCCGGACACGCTGTGCGCAGCTTATCCGCA  
CCGCTTCGTCCCAAAGGCCGGAGCTAGGCTAATCGTATCAGACTTCAGCGCCATCGAAGCC



CGTGTGATTGCGTGGATGGCTGGTGAAGAGTGGCGACAGGATGTGTTTTGCCAAGGGCGGGG  
ATATCTACTGCGCCTCCGCATCGCAGATGTTCAAGGTGCCGGTTGAAAAACATGGCATCAAC  
GGTCACCTACGTCAAAAAGGCAAGATTGCTGAACTCGCCCTCGGTTATGGTGGTTCCGTCGG  
TGCCTCAAAGCAATGGGCGCTCTTGATATGGGACTTGAAGAGGACGAACTCCCTCAGCTGG  
TTGACGCATGGCGGCAAGCCAATCCGTGCATCGTAAAATTCTGGTGGGATGTGGACAAGGC  
CGCTATGGAGGCTGTTTCGCTATAAACGCACCAACTCGACGCATGGGATCACTTTCTCCTGCC  
AGAGTGGGATGCTTTTCATTACGCTTCTTCCGGCAGGCGGCTTGCCTATGTGAAGCCGCGA  
ATCGGTGAAAACAAGTTCGGCGGGCAGTGCATCACCTACGAAGGTGTTGGTGCTACGAAGA  
AGTGGGAGCGACTGGATTCTACGGACCGAAGTTCGTGGAAAACATCGTACAAGCAACTGC  
CCGCGACATCCTTTGCAACGCCATGCAAACACTCCAGCACTGCTCCATCGTCATGCACGTCC  
ACGACGAAATCGTCATCGAAGCTGATCCACGGATGTCTCTGAAAGCAGTCTGTGAGCAGAT  
GGGCCGAACACCTTCTTGGGCTAAGGGACTGCTGCTCCGCGCCGATGGCTACGAGACAGATT  
TTTATAAAAAAGATTGAGCCTTTTTCGTTCAAACCCGTTTTTGGACCTCCATTGGGTAATAGAG  
GTGGACAAAAGCCCGCCCGGATTGGAGGTCAAATGAGCATTGATAAATTTAACAGCGAG  
GGTTACTACGACCCAACCGCCTACGAAGCATTGTCTGCTGTGAAAAAGAAGAACAGGCGC  
TTCGGGCATTCAGGCCAATTGTCTATATCTGCTCTCCCTTTTCTGGAGATGTAGAAGGAAACG  
TAAAGGCTGCACAGCGCTACAGCCGATTTCGCCGTGGACAAGGGCTTCATTCCCATTGCACCA  
CATTTGCTGTTTTCCACAGTTTTTGAACGAAAACATTCCAGCCGAACGCCAGCTTGGGCTATTC  
TTCGGCAACGCCTTAATGAGCAAATGTACAGAGGTCTGGGTGTTTCGGCAGCACCATCTCAGC  
TGGTATGTCGGCTGAAATCAAGAGAGCCAAGTGGAAAGAACTACCGCTTACGCTACTTTAATG  
AAAACCTGCGAGGAGGTTTAATCATGTACGCTATCACAGAAAAGGAAAGAAATATCGACGGC  
ACCACTATCACGACTTTTAGCCGTGATATATACAGCGCAAATGTTCTCGAAGTCGAAGCTGG  
CACCAACGGTTATAAGGGTGGAGATTCCGGCCACGGCAGCCGTACTTACTTTTCGCATCGAGA  
ACGCCGGAGGCACTGACATTGAAGCGCATCTGATTGGTCCGTATGGCACAGATGGCATAGA  
GGTGTCTCTTGGTGGTGA CTGCGAGCTTGAACAATCATCACCGCACTTAAATTCATCACCA  
AGGTACTGGAGGATGGCGCATCGGAGGTGAACGACTGATGTTCACTCTTTATCACGCCGACT  
TCATCGGCAACCCCGGCAACTGCTCTTATCCACACATGGTCGAGGTCATTGATGCAAGTTCT  
TTGATCGCAGCTGTTGGCCATGACTATGTGTGCGCTGAGTACCGGAACAGCTATCGGAATGG  
TGAAAACCTTCATCGGTAGCAATTGCCTACCGGTGGACTGCGACAATGATCACTCAGAGCAAC  
CGGAAGATTGGGTGCTTCCCGCCGATGTCATGGAGGCGTTCCCGGTGTCACCTTTGCCGTT  
CATTATAGCCGCTACAATATGCGCGAGAAAA
